# Supplementary material for: Enhancers display constrained sequence flexibility and context-specific modulation of motif function
Source: HighWire-hosted journal article supplement (doi:10.1101/gr.277246.122), 2023-03-01
Supplement: Supplemental_Table__S1.xlsx [file Supplemental_Table__S1.xlsx]

## Sheet: Legend
Supplemental Table S1. Primers used for UMI-STARR-seq library cloning.
Primers used for UMI-STARR-seq library cloning.

## Sheet: Supplemental Table S1
Primer name	sequence 5'-3'
ced6_pos110_GATA1-nnn_FW	CATTTTTCAAACGACGAACAAnnnnnnnnGTCGACAACTAAACCGCAG
ced6_pos110_GATA1-nnn_REV	GTTCGTCGTTTGAAAAATGTG
ced6_pos182-nnn_FW	CAAGTCGCTGTACTACGCAnnnnnnnnCATAGTATATTTAACAAAACGGAG
ced6_pos182-nnn_REV	GCGTAGTACAGCGACTTGTAC
ced6_pos230-nnn_FW	GAGCCAAGTCGCGGAAGTAnnnnnnnnCATCTTATCGCACTTAGATCG
ced6_pos230-nnn_REV	CTTCCGCGACTTGGCTC
ced6_pos241_GATA2-nnn_FW	GCGGAAGTAATTCTCCGCATnnnnnnnnACTTAGATCGGAAGAGCACAC
ced6_pos241_GATA2-nnn_REV	GCGGAGAATTACTTCCGCGAC
ZnT63C_pos142_AP1-nnn_FW	CTTGTTATTTAAGCATGTAAnnnnnnnnTATAAATGAGTAGAGATTTTC
ZnT63C_pos142_AP1-nnn_REV	TTACATGCTTAAATAACAAG
ZnT63C_pos180_twist-nnn_FW	GTAGAGATTTTCGCTTGGCGAnnnnnnnnTTCAAAATTGATTCTATTG
ZnT63C_pos180_twist-nnn_REV	TCGCCAAGCGAAAATCTCTAC
ZnT63C_pos210_GATA-nnn_FW	CAAAATTGATTCTATTGCAGnnnnnnnnAGTAGTGTACATTCTGCAAAC
ZnT63C_pos210_GATA-nnn_REV	CTGCAATAGAATCAATTTTG
lib cloning Drosophila gibson FW	CAACTGATCTAGAGCATGCAACACTCTTTCCCTACACGACGCTCTTCCGATCT
lib cloning Drosophila gibson RV	GAAGCGGCCGGCCGAATTCGGTGACTGGAGTTCAGACGTGTGCTCTTCCGATCT
lib cloning human gibson FW	TAGATTGATCTAGAGCATGCACCGGACACTCTTTCCCTACACGACGCTCTTCCGATCT
lib cloning human gibson RV	CGAAGCGGCCGGCCGAATTCGTCGAGTGACTGGAGTTCAGACGTGTGCTCTTCCGATCT
