# Supplementary material for: Enhancers display constrained sequence flexibility and context-specific modulation of motif function
Source: HighWire-hosted journal article supplement (doi:10.1101/gr.277246.122), 2023-03-01
Supplement: Supplemental_Table_S3.xlsx [file Supplemental_Table_S3.xlsx]

## Sheet: Legend
Supplemental Table S3. Activity of random variants in seven enhancer positions.
8nt and 16nt forward and reverse sequences, activities and scaled activities in each of the seven enhancer positions.

## Sheet: Supplemental Table S3
variant_sequence_fw	variant_sequence_rv	ced6_pos110_act	ced6_pos110_fw_extended4bp	ced6_pos110_rv_extended4bp	ced6_pos182_act	ced6_pos182_fw_extended4bp	ced6_pos182_rv_extended4bp	ced6_pos230_act	ced6_pos230_fw_extended4bp	ced6_pos230_rv_extended4bp	ced6_pos241_act	ced6_pos241_fw_extended4bp	ced6_pos241_rv_extended4bp	ZnT63C_pos210_act	ZnT63C_pos210_fw_extended4bp	ZnT63C_pos210_rv_extended4bp	ZnT63C_pos142_act	ZnT63C_pos142_fw_extended4bp	ZnT63C_pos142_rv_extended4bp	ZnT63C_pos180_act	ZnT63C_pos180_fw_extended4bp	ZnT63C_pos180_rv_extended4bp	ced6_pos110_act_scaled	ced6_pos182_act_scaled	ced6_pos230_act_scaled	ced6_pos241_act_scaled	ZnT63C_pos210_act_scaled	ZnT63C_pos142_act_scaled	ZnT63C_pos180_act_scaled
AAAAAAAA	TTTTTTTT	4.38486	ACAAAAAAAAAAGTCG	CGACTTTTTTTTTTGT	NA	CGCAAAAAAAAACATA	TATGTTTTTTTTTGCG	6.27951	AGTAAAAAAAAACATC	GATGTTTTTTTTTACT	3.59767	GCATAAAAAAAAACTT	AAGTTTTTTTTTATGC	4.05462	GCAGAAAAAAAAAGTA	TACTTTTTTTTTCTGC	NA	GTAAAAAAAAAATATA	TATATTTTTTTTTTAC	3.37276	GCGAAAAAAAAATTCA	TGAATTTTTTTTTCGC	0.82818	NA	1.11787	0.947385	-0.00243817	NA	0.673856
AAAAAAAC	GTTTTTTT	4.73772	ACAAAAAAAAACGTCG	CGACGTTTTTTTTTGT	NA	CGCAAAAAAAACCATA	TATGGTTTTTTTTGCG	5.66392	AGTAAAAAAAACCATC	GATGGTTTTTTTTACT	3.64324	GCATAAAAAAACACTT	AAGTGTTTTTTTATGC	4.48079	GCAGAAAAAAACAGTA	TACTGTTTTTTTCTGC	NA	GTAAAAAAAAACTATA	TATAGTTTTTTTTTAC	NA	GCGAAAAAAAACTTCA	TGAAGTTTTTTTTCGC	1.331	NA	0.393071	0.993422	0.352822	NA	NA
AAAAAAAG	CTTTTTTT	4.1912	ACAAAAAAAAAGGTCG	CGACCTTTTTTTTTGT	NA	CGCAAAAAAAAGCATA	TATGCTTTTTTTTGCG	6.09398	AGTAAAAAAAAGCATC	GATGCTTTTTTTTACT	3.11094	GCATAAAAAAAGACTT	AAGTCTTTTTTTATGC	NA	GCAGAAAAAAAGAGTA	TACTCTTTTTTTCTGC	NA	GTAAAAAAAAAGTATA	TATACTTTTTTTTTAC	NA	GCGAAAAAAAAGTTCA	TGAACTTTTTTTTCGC	0.55221	NA	0.899429	0.455667	NA	NA	NA
AAAAAAAT	ATTTTTTT	4.49983	ACAAAAAAAAATGTCG	CGACATTTTTTTTTGT	NA	CGCAAAAAAAATCATA	TATGATTTTTTTTGCG	6.1584	AGTAAAAAAAATCATC	GATGATTTTTTTTACT	3.83619	GCATAAAAAAATACTT	AAGTATTTTTTTATGC	3.90234	GCAGAAAAAAATAGTA	TACTATTTTTTTCTGC	NA	GTAAAAAAAAATTATA	TATAATTTTTTTTTAC	3.53542	GCGAAAAAAAATTTCA	TGAAATTTTTTTTCGC	0.992007	NA	0.975276	1.18834	-0.129385	NA	0.842691
AAAAAACA	TGTTTTTT	3.83836	ACAAAAAAAACAGTCG	CGACTGTTTTTTTTGT	NA	CGCAAAAAAACACATA	TATGTGTTTTTTTGCG	6.06511	AGTAAAAAAACACATC	GATGTGTTTTTTTACT	2.27069	GCATAAAAAACAACTT	AAGTTGTTTTTTATGC	NA	GCAGAAAAAACAAGTA	TACTTGTTTTTTCTGC	NA	GTAAAAAAAACATATA	TATATGTTTTTTTTAC	NA	GCGAAAAAAACATTCA	TGAATGTTTTTTTCGC	0.0494143	NA	0.865427	-0.393183	NA	NA	NA
AAAAAACC	GGTTTTTT	3.69503	ACAAAAAAAACCGTCG	CGACGGTTTTTTTTGT	NA	CGCAAAAAAACCCATA	TATGGGTTTTTTTGCG	6.24739	AGTAAAAAAACCCATC	GATGGGTTTTTTTACT	1.74607	GCATAAAAAACCACTT	AAGTGGTTTTTTATGC	NA	GCAGAAAAAACCAGTA	TACTGGTTTTTTCTGC	NA	GTAAAAAAAACCTATA	TATAGGTTTTTTTTAC	NA	GCGAAAAAAACCTTCA	TGAAGGTTTTTTTCGC	-0.154826	NA	1.08004	-0.923171	NA	NA	NA
AAAAAACG	CGTTTTTT	4.17112	ACAAAAAAAACGGTCG	CGACCGTTTTTTTTGT	4.4569	CGCAAAAAAACGCATA	TATGCGTTTTTTTGCG	5.50197	AGTAAAAAAACGCATC	GATGCGTTTTTTTACT	3.51241	GCATAAAAAACGACTT	AAGTCGTTTTTTATGC	4.74423	GCAGAAAAAACGAGTA	TACTCGTTTTTTCTGC	4.09996	GTAAAAAAAACGTATA	TATACGTTTTTTTTAC	1.9001	GCGAAAAAAACGTTCA	TGAACGTTTTTTTCGC	0.523601	-0.563745	0.202404	0.861248	0.57243	1.18544	-0.854741
AAAAAACT	AGTTTTTT	4.37058	ACAAAAAAAACTGTCG	CGACAGTTTTTTTTGT	NA	CGCAAAAAAACTCATA	TATGAGTTTTTTTGCG	5.98949	AGTAAAAAAACTCATC	GATGAGTTTTTTTACT	2.79185	GCATAAAAAACTACTT	AAGTAGTTTTTTATGC	3.59199	GCAGAAAAAACTAGTA	TACTAGTTTTTTCTGC	NA	GTAAAAAAAACTTATA	TATAAGTTTTTTTTAC	1.76439	GCGAAAAAAACTTTCA	TGAAAGTTTTTTTCGC	0.807825	NA	0.776399	0.133318	-0.388096	NA	-0.995597
AAAAAAGA	TCTTTTTT	4.44039	ACAAAAAAAAGAGTCG	CGACTCTTTTTTTTGT	NA	CGCAAAAAAAGACATA	TATGTCTTTTTTTGCG	5.75264	AGTAAAAAAAGACATC	GATGTCTTTTTTTACT	3.28039	GCATAAAAAAGAACTT	AAGTTCTTTTTTATGC	2.30073	GCAGAAAAAAGAAGTA	TACTTCTTTTTTCTGC	NA	GTAAAAAAAAGATATA	TATATCTTTTTTTTAC	2.17393	GCGAAAAAAAGATTCA	TGAATCTTTTTTTCGC	0.907306	NA	0.497534	0.626851	-1.46451	NA	-0.570508
AAAAAAGC	GCTTTTTT	3.97372	ACAAAAAAAAGCGTCG	CGACGCTTTTTTTTGT	NA	CGCAAAAAAAGCCATA	TATGGCTTTTTTTGCG	6.45072	AGTAAAAAAAGCCATC	GATGGCTTTTTTTACT	1.8466	GCATAAAAAAGCACTT	AAGTGCTTTTTTATGC	NA	GCAGAAAAAAGCAGTA	TACTGCTTTTTTCTGC	3.74534	GTAAAAAAAAGCTATA	TATAGCTTTTTTTTAC	3.38943	GCGAAAAAAAGCTTCA	TGAAGCTTTTTTTCGC	0.2423	NA	1.31945	-0.821613	NA	0.855746	0.691159
AAAAAAGG	CCTTTTTT	4.03613	ACAAAAAAAAGGGTCG	CGACCCTTTTTTTTGT	4.03141	CGCAAAAAAAGGCATA	TATGCCTTTTTTTGCG	5.16351	AGTAAAAAAAGGCATC	GATGCCTTTTTTTACT	NA	GCATAAAAAAGGACTT	AAGTCCTTTTTTATGC	NA	GCAGAAAAAAGGAGTA	TACTCCTTTTTTCTGC	NA	GTAAAAAAAAGGTATA	TATACCTTTTTTTTAC	1.40558	GCGAAAAAAAGGTTCA	TGAACCTTTTTTTCGC	0.331237	-1.13066	-0.196096	NA	NA	NA	-1.36803
AAAAAAGT	ACTTTTTT	3.82975	ACAAAAAAAAGTGTCG	CGACACTTTTTTTTGT	NA	CGCAAAAAAAGTCATA	TATGACTTTTTTTGCG	5.89777	AGTAAAAAAAGTCATC	GATGACTTTTTTTACT	2.74519	GCATAAAAAAGTACTT	AAGTACTTTTTTATGC	2.9611	GCAGAAAAAAGTAGTA	TACTACTTTTTTCTGC	2.69086	GTAAAAAAAAGTTATA	TATAACTTTTTTTTAC	NA	GCGAAAAAAAGTTTCA	TGAAACTTTTTTTCGC	0.037147	NA	0.668413	0.086173	-0.914017	-0.12462	NA
AAAAAATA	TATTTTTT	4.20069	ACAAAAAAAATAGTCG	CGACTATTTTTTTTGT	NA	CGCAAAAAAATACATA	TATGTATTTTTTTGCG	NA	AGTAAAAAAATACATC	GATGTATTTTTTTACT	1.99697	GCATAAAAAATAACTT	AAGTTATTTTTTATGC	4.05872	GCAGAAAAAATAAGTA	TACTTATTTTTTCTGC	NA	GTAAAAAAAATATATA	TATATATTTTTTTTAC	2.85522	GCGAAAAAAATATTCA	TGAATATTTTTTTCGC	0.565732	NA	NA	-0.669701	0.000974695	NA	0.136659
AAAAAATC	GATTTTTT	4.87776	ACAAAAAAAATCGTCG	CGACGATTTTTTTTGT	NA	CGCAAAAAAATCCATA	TATGGATTTTTTTGCG	5.66928	AGTAAAAAAATCCATC	GATGGATTTTTTTACT	3.04175	GCATAAAAAATCACTT	AAGTGATTTTTTATGC	3.67199	GCAGAAAAAATCAGTA	TACTGATTTTTTCTGC	NA	GTAAAAAAAATCTATA	TATAGATTTTTTTTAC	NA	GCGAAAAAAATCTTCA	TGAAGATTTTTTTCGC	1.53056	NA	0.399387	0.385776	-0.321411	NA	NA
AAAAAATG	CATTTTTT	3.76429	ACAAAAAAAATGGTCG	CGACCATTTTTTTTGT	NA	CGCAAAAAAATGCATA	TATGCATTTTTTTGCG	4.77958	AGTAAAAAAATGCATC	GATGCATTTTTTTACT	1.94989	GCATAAAAAATGACTT	AAGTCATTTTTTATGC	5.09474	GCAGAAAAAATGAGTA	TACTCATTTTTTCTGC	3.26173	GTAAAAAAAATGTATA	TATACATTTTTTTTAC	3.79206	GCGAAAAAAATGTTCA	TGAACATTTTTTTCGC	-0.0561347	NA	-0.648131	-0.717258	0.86462	0.406129	1.10908
AAAAAATT	AATTTTTT	4.78399	ACAAAAAAAATTGTCG	CGACAATTTTTTTTGT	NA	CGCAAAAAAATTCATA	TATGAATTTTTTTGCG	6.17399	AGTAAAAAAATTCATC	GATGAATTTTTTTACT	2.89295	GCATAAAAAATTACTT	AAGTAATTTTTTATGC	3.67651	GCAGAAAAAATTAGTA	TACTAATTTTTTCTGC	NA	GTAAAAAAAATTTATA	TATAAATTTTTTTTAC	2.8969	GCGAAAAAAATTTTCA	TGAAAATTTTTTTCGC	1.39693	NA	0.993622	0.235452	-0.317637	NA	0.179924
AAAAACAA	TTGTTTTT	4.59703	ACAAAAAAACAAGTCG	CGACTTGTTTTTTTGT	NA	CGCAAAAAACAACATA	TATGTTGTTTTTTGCG	6.36129	AGTAAAAAACAACATC	GATGTTGTTTTTTACT	3.57131	GCATAAAAACAAACTT	AAGTTTGTTTTTATGC	3.78572	GCAGAAAAACAAAGTA	TACTTTGTTTTTCTGC	NA	GTAAAAAAACAATATA	TATATTGTTTTTTTAC	NA	GCGAAAAAACAATTCA	TGAATTGTTTTTTCGC	1.13053	NA	1.21416	0.920754	-0.2266	NA	NA
AAAAACAC	GTGTTTTT	3.77625	ACAAAAAAACACGTCG	CGACGTGTTTTTTTGT	NA	CGCAAAAAACACCATA	TATGGTGTTTTTTGCG	5.10936	AGTAAAAAACACCATC	GATGGTGTTTTTTACT	2.12004	GCATAAAAACACACTT	AAGTGTGTTTTTATGC	NA	GCAGAAAAACACAGTA	TACTGTGTTTTTCTGC	NA	GTAAAAAAACACTATA	TATAGTGTTTTTTTAC	NA	GCGAAAAAACACTTCA	TGAAGTGTTTTTTCGC	-0.039092	NA	-0.259855	-0.545366	NA	NA	NA
AAAAACAG	CTGTTTTT	4.42534	ACAAAAAAACAGGTCG	CGACCTGTTTTTTTGT	NA	CGCAAAAAACAGCATA	TATGCTGTTTTTTGCG	5.30489	AGTAAAAAACAGCATC	GATGCTGTTTTTTACT	3.11024	GCATAAAAACAGACTT	AAGTCTGTTTTTATGC	NA	GCAGAAAAACAGAGTA	TACTCTGTTTTTCTGC	NA	GTAAAAAAACAGTATA	TATACTGTTTTTTTAC	NA	GCGAAAAAACAGTTCA	TGAACTGTTTTTTCGC	0.885861	NA	-0.02964	0.454967	NA	NA	NA
AAAAACAT	ATGTTTTT	4.42992	ACAAAAAAACATGTCG	CGACATGTTTTTTTGT	NA	CGCAAAAAACATCATA	TATGATGTTTTTTGCG	5.49998	AGTAAAAAACATCATC	GATGATGTTTTTTACT	2.72675	GCATAAAAACATACTT	AAGTATGTTTTTATGC	NA	GCAGAAAAACATAGTA	TACTATGTTTTTCTGC	NA	GTAAAAAAACATTATA	TATAATGTTTTTTTAC	NA	GCGAAAAAACATTTCA	TGAAATGTTTTTTCGC	0.892388	NA	0.20006	0.0675543	NA	NA	NA
AAAAACCA	TGGTTTTT	3.72926	ACAAAAAAACCAGTCG	CGACTGGTTTTTTTGT	NA	CGCAAAAAACCACATA	TATGTGGTTTTTTGCG	5.54088	AGTAAAAAACCACATC	GATGTGGTTTTTTACT	NA	GCATAAAAACCAACTT	AAGTTGGTTTTTATGC	NA	GCAGAAAAACCAAGTA	TACTTGGTTTTTCTGC	3.54094	GTAAAAAAACCATATA	TATATGGTTTTTTTAC	NA	GCGAAAAAACCATTCA	TGAATGGTTTTTTCGC	-0.106054	NA	0.248216	NA	NA	0.665707	NA
AAAAACCC	GGGTTTTT	3.91887	ACAAAAAAACCCGTCG	CGACGGGTTTTTTTGT	NA	CGCAAAAAACCCCATA	TATGGGGTTTTTTGCG	NA	AGTAAAAAACCCCATC	GATGGGGTTTTTTACT	NA	GCATAAAAACCCACTT	AAGTGGGTTTTTATGC	NA	GCAGAAAAACCCAGTA	TACTGGGTTTTTCTGC	NA	GTAAAAAAACCCTATA	TATAGGGTTTTTTTAC	NA	GCGAAAAAACCCTTCA	TGAAGGGTTTTTTCGC	0.164148	NA	NA	NA	NA	NA	NA
AAAAACCG	CGGTTTTT	4.57398	ACAAAAAAACCGGTCG	CGACCGGTTTTTTTGT	NA	CGCAAAAAACCGCATA	TATGCGGTTTTTTGCG	5.43624	AGTAAAAAACCGCATC	GATGCGGTTTTTTACT	2.32526	GCATAAAAACCGACTT	AAGTCGGTTTTTATGC	NA	GCAGAAAAACCGAGTA	TACTCGGTTTTTCTGC	NA	GTAAAAAAACCGTATA	TATACGGTTTTTTTAC	NA	GCGAAAAAACCGTTCA	TGAACGGTTTTTTCGC	1.09767	NA	0.125013	-0.33805	NA	NA	NA
AAAAACCT	AGGTTTTT	3.81251	ACAAAAAAACCTGTCG	CGACAGGTTTTTTTGT	NA	CGCAAAAAACCTCATA	TATGAGGTTTTTTGCG	5.93721	AGTAAAAAACCTCATC	GATGAGGTTTTTTACT	1.91536	GCATAAAAACCTACTT	AAGTAGGTTTTTATGC	NA	GCAGAAAAACCTAGTA	TACTAGGTTTTTCTGC	NA	GTAAAAAAACCTTATA	TATAAGGTTTTTTTAC	NA	GCGAAAAAACCTTTCA	TGAAAGGTTTTTTCGC	0.0125776	NA	0.714843	-0.752149	NA	NA	NA
AAAAACGA	TCGTTTTT	4.27141	ACAAAAAAACGAGTCG	CGACTCGTTTTTTTGT	NA	CGCAAAAAACGACATA	TATGTCGTTTTTTGCG	5.20956	AGTAAAAAACGACATC	GATGTCGTTTTTTACT	3.47625	GCATAAAAACGAACTT	AAGTTCGTTTTTATGC	1.87662	GCAGAAAAACGAAGTA	TACTTCGTTTTTCTGC	3.87866	GTAAAAAAACGATATA	TATATCGTTTTTTTAC	NA	GCGAAAAAACGATTCA	TGAATCGTTTTTTCGC	0.666517	NA	-0.141878	0.824719	-1.81805	0.979688	NA
AAAAACGC	GCGTTTTT	4.78624	ACAAAAAAACGCGTCG	CGACGCGTTTTTTTGT	NA	CGCAAAAAACGCCATA	TATGGCGTTTTTTGCG	4.49525	AGTAAAAAACGCCATC	GATGGCGTTTTTTACT	NA	GCATAAAAACGCACTT	AAGTGCGTTTTTATGC	NA	GCAGAAAAACGCAGTA	TACTGCGTTTTTCTGC	NA	GTAAAAAAACGCTATA	TATAGCGTTTTTTTAC	3.55021	GCGAAAAAACGCTTCA	TGAAGCGTTTTTTCGC	1.40014	NA	-0.982896	NA	NA	NA	0.858043
AAAAACGG	CCGTTTTT	3.81192	ACAAAAAAACGGGTCG	CGACCCGTTTTTTTGT	3.73338	CGCAAAAAACGGCATA	TATGCCGTTTTTTGCG	5.54508	AGTAAAAAACGGCATC	GATGCCGTTTTTTACT	2.09109	GCATAAAAACGGACTT	AAGTCCGTTTTTATGC	1.40952	GCAGAAAAACGGAGTA	TACTCCGTTTTTCTGC	2.7936	GTAAAAAAACGGTATA	TATACCGTTTTTTTAC	1.98748	GCGAAAAAACGGTTCA	TGAACCGTTTTTTCGC	0.0117316	-1.52774	0.253155	-0.574612	-2.20743	-0.0291021	-0.764035
AAAAACGT	ACGTTTTT	4.48829	ACAAAAAAACGTGTCG	CGACACGTTTTTTTGT	NA	CGCAAAAAACGTCATA	TATGACGTTTTTTGCG	5.39512	AGTAAAAAACGTCATC	GATGACGTTTTTTACT	1.08255	GCATAAAAACGTACTT	AAGTACGTTTTTATGC	2.82353	GCAGAAAAACGTAGTA	TACTACGTTTTTCTGC	3.4732	GTAAAAAAACGTTATA	TATAACGTTTTTTTAC	1.49709	GCGAAAAAACGTTTCA	TGAAACGTTTTTTCGC	0.975569	NA	0.076598	-1.59348	-1.02869	0.602728	-1.27305
AAAAACTA	TAGTTTTT	4.34047	ACAAAAAAACTAGTCG	CGACTAGTTTTTTTGT	NA	CGCAAAAAACTACATA	TATGTAGTTTTTTGCG	5.6963	AGTAAAAAACTACATC	GATGTAGTTTTTTACT	1.73574	GCATAAAAACTAACTT	AAGTTAGTTTTTATGC	3.73905	GCAGAAAAACTAAGTA	TACTTAGTTTTTCTGC	NA	GTAAAAAAACTATATA	TATATAGTTTTTTTAC	NA	GCGAAAAAACTATTCA	TGAATAGTTTTTTCGC	0.764915	NA	0.431197	-0.933608	-0.265506	NA	NA
AAAAACTC	GAGTTTTT	4.41509	ACAAAAAAACTCGTCG	CGACGAGTTTTTTTGT	NA	CGCAAAAAACTCCATA	TATGGAGTTTTTTGCG	NA	AGTAAAAAACTCCATC	GATGGAGTTTTTTACT	1.89824	GCATAAAAACTCACTT	AAGTGAGTTTTTATGC	3.64098	GCAGAAAAACTCAGTA	TACTGAGTTTTTCTGC	NA	GTAAAAAAACTCTATA	TATAGAGTTTTTTTAC	NA	GCGAAAAAACTCTTCA	TGAAGAGTTTTTTCGC	0.87125	NA	NA	-0.769438	-0.34726	NA	NA
AAAAACTG	CAGTTTTT	3.79377	ACAAAAAAACTGGTCG	CGACCAGTTTTTTTGT	NA	CGCAAAAAACTGCATA	TATGCAGTTTTTTGCG	4.28066	AGTAAAAAACTGCATC	GATGCAGTTTTTTACT	3.30628	GCATAAAAACTGACTT	AAGTCAGTTTTTATGC	4.20999	GCAGAAAAACTGAGTA	TACTCAGTTTTTCTGC	3.67686	GTAAAAAAACTGTATA	TATACAGTTTTTTTAC	1.80883	GCGAAAAAACTGTTCA	TGAACAGTTTTTTCGC	-0.014132	NA	-1.23555	0.653006	0.127079	0.79208	-0.949475
AAAAACTT	AAGTTTTT	4.68171	ACAAAAAAACTTGTCG	CGACAAGTTTTTTTGT	NA	CGCAAAAAACTTCATA	TATGAAGTTTTTTGCG	4.31597	AGTAAAAAACTTCATC	GATGAAGTTTTTTACT	2.73072	GCATAAAAACTTACTT	AAGTAAGTTTTTATGC	4.21051	GCAGAAAAACTTAGTA	TACTAAGTTTTTCTGC	NA	GTAAAAAAACTTTATA	TATAAAGTTTTTTTAC	3.40935	GCGAAAAAACTTTTCA	TGAAAAGTTTTTTCGC	1.25118	NA	-1.19398	0.0715573	0.127514	NA	0.711835
AAAAAGAA	TTCTTTTT	4.24371	ACAAAAAAAGAAGTCG	CGACTTCTTTTTTTGT	NA	CGCAAAAAAGAACATA	TATGTTCTTTTTTGCG	5.97026	AGTAAAAAAGAACATC	GATGTTCTTTTTTACT	2.72961	GCATAAAAAGAAACTT	AAGTTTCTTTTTATGC	NA	GCAGAAAAAGAAAGTA	TACTTTCTTTTTCTGC	4.04238	GTAAAAAAAGAATATA	TATATTCTTTTTTTAC	2.14583	GCGAAAAAAGAATTCA	TGAATTCTTTTTTCGC	0.627037	NA	0.753758	0.0704342	NA	1.1319	-0.599676
AAAAAGAC	GTCTTTTT	3.78158	ACAAAAAAAGACGTCG	CGACGTCTTTTTTTGT	NA	CGCAAAAAAGACCATA	TATGGTCTTTTTTGCG	6.2456	AGTAAAAAAGACCATC	GATGGTCTTTTTTACT	2.8003	GCATAAAAAGACACTT	AAGTGTCTTTTTATGC	1.38293	GCAGAAAAAGACAGTA	TACTGTCTTTTTCTGC	NA	GTAAAAAAAGACTATA	TATAGTCTTTTTTTAC	NA	GCGAAAAAAGACTTCA	TGAAGTCTTTTTTCGC	-0.0314964	NA	1.07794	0.141856	-2.2296	NA	NA
AAAAAGAG	CTCTTTTT	4.85766	ACAAAAAAAGAGGTCG	CGACCTCTTTTTTTGT	NA	CGCAAAAAAGAGCATA	TATGCTCTTTTTTGCG	5.61587	AGTAAAAAAGAGCATC	GATGCTCTTTTTTACT	3.62055	GCATAAAAAGAGACTT	AAGTCTCTTTTTATGC	2.90186	GCAGAAAAAGAGAGTA	TACTCTCTTTTTCTGC	2.81951	GTAAAAAAAGAGTATA	TATACTCTTTTTTTAC	1.28856	GCGAAAAAAGAGTTCA	TGAACTCTTTTTTCGC	1.50192	NA	0.336501	0.970497	-0.963397	-0.00501153	-1.4895
AAAAAGAT	ATCTTTTT	3.56055	ACAAAAAAAGATGTCG	CGACATCTTTTTTTGT	NA	CGCAAAAAAGATCATA	TATGATCTTTTTTGCG	5.60068	AGTAAAAAAGATCATC	GATGATCTTTTTTACT	3.00437	GCATAAAAAGATACTT	AAGTATCTTTTTATGC	4.10887	GCAGAAAAAGATAGTA	TACTATCTTTTTCTGC	2.33575	GTAAAAAAAGATTATA	TATAATCTTTTTTTAC	NA	GCGAAAAAAGATTTCA	TGAAATCTTTTTTCGC	-0.346462	NA	0.318614	0.348013	0.042782	-0.454768	NA
AAAAAGCA	TGCTTTTT	4.27035	ACAAAAAAAGCAGTCG	CGACTGCTTTTTTTGT	NA	CGCAAAAAAGCACATA	TATGTGCTTTTTTGCG	6.26662	AGTAAAAAAGCACATC	GATGTGCTTTTTTACT	2.53849	GCATAAAAAGCAACTT	AAGTTGCTTTTTATGC	3.52404	GCAGAAAAAGCAAGTA	TACTTGCTTTTTCTGC	4.54019	GTAAAAAAAGCATATA	TATATGCTTTTTTTAC	NA	GCGAAAAAAGCATTCA	TGAATGCTTTTTTCGC	0.665007	NA	1.10269	-0.122635	-0.444738	1.59472	NA
AAAAAGCC	GGCTTTTT	3.8507	ACAAAAAAAGCCGTCG	CGACGGCTTTTTTTGT	NA	CGCAAAAAAGCCCATA	TATGGGCTTTTTTGCG	5.87972	AGTAAAAAAGCCCATC	GATGGGCTTTTTTACT	2.78863	GCATAAAAAGCCACTT	AAGTGGCTTTTTATGC	NA	GCAGAAAAAGCCAGTA	TACTGGCTTTTTCTGC	NA	GTAAAAAAAGCCTATA	TATAGGCTTTTTTTAC	3.2929	GCGAAAAAAGCCTTCA	TGAAGGCTTTTTTCGC	0.0670028	NA	0.647151	0.130067	NA	NA	0.590962
AAAAAGCG	CGCTTTTT	4.25619	ACAAAAAAAGCGGTCG	CGACCGCTTTTTTTGT	5.12025	CGCAAAAAAGCGCATA	TATGCGCTTTTTTGCG	5.34829	AGTAAAAAAGCGCATC	GATGCGCTTTTTTACT	2.35298	GCATAAAAAGCGACTT	AAGTCGCTTTTTATGC	3.70874	GCAGAAAAAGCGAGTA	TACTCGCTTTTTCTGC	4.08058	GTAAAAAAAGCGTATA	TATACGCTTTTTTTAC	1.54706	GCGAAAAAAGCGTTCA	TGAACGCTTTTTTCGC	0.644826	0.320063	0.0214556	-0.310046	-0.290775	1.16741	-1.22118
AAAAAGCT	AGCTTTTT	4.09084	ACAAAAAAAGCTGTCG	CGACAGCTTTTTTTGT	NA	CGCAAAAAAGCTCATA	TATGAGCTTTTTTGCG	5.73576	AGTAAAAAAGCTCATC	GATGAGCTTTTTTACT	2.9538	GCATAAAAAGCTACTT	AAGTAGCTTTTTATGC	2.58995	GCAGAAAAAGCTAGTA	TACTAGCTTTTTCTGC	NA	GTAAAAAAAGCTTATA	TATAAGCTTTTTTTAC	2.57129	GCGAAAAAAGCTTTCA	TGAAAGCTTTTTTCGC	0.409196	NA	0.477659	0.296926	-1.22341	NA	-0.15806
AAAAAGGA	TCCTTTTT	NA	ACAAAAAAAGGAGTCG	CGACTCCTTTTTTTGT	NA	CGCAAAAAAGGACATA	TATGTCCTTTTTTGCG	1.66548	AGTAAAAAAGGACATC	GATGTCCTTTTTTACT	1.69383	GCATAAAAAGGAACTT	AAGTTCCTTTTTATGC	5.26512	GCAGAAAAAGGAAGTA	TACTTCCTTTTTCTGC	2.41242	GTAAAAAAAGGATATA	TATATCCTTTTTTTAC	NA	GCGAAAAAAGGATTCA	TGAATCCTTTTTTCGC	NA	NA	-4.31463	-0.975939	1.00665	-0.383486	NA
AAAAAGGC	GCCTTTTT	4.1589	ACAAAAAAAGGCGTCG	CGACGCCTTTTTTTGT	NA	CGCAAAAAAGGCCATA	TATGGCCTTTTTTGCG	5.62909	AGTAAAAAAGGCCATC	GATGGCCTTTTTTACT	1.97201	GCATAAAAAGGCACTT	AAGTGCCTTTTTATGC	2.78528	GCAGAAAAAGGCAGTA	TACTGCCTTTTTCTGC	2.94188	GTAAAAAAAGGCTATA	TATAGCCTTTTTTTAC	3.41439	GCGAAAAAAGGCTTCA	TGAAGCCTTTTTTCGC	0.506179	NA	0.352074	-0.694913	-1.06058	0.108755	0.71706
AAAAAGGG	CCCTTTTT	3.65585	ACAAAAAAAGGGGTCG	CGACCCCTTTTTTTGT	NA	CGCAAAAAAGGGCATA	TATGCCCTTTTTTGCG	4.97272	AGTAAAAAAGGGCATC	GATGCCCTTTTTTACT	1.1832	GCATAAAAAGGGACTT	AAGTCCCTTTTTATGC	1.08005	GCAGAAAAAGGGAGTA	TACTCCCTTTTTCTGC	3.44633	GTAAAAAAAGGGTATA	TATACCCTTTTTTTAC	NA	GCGAAAAAAGGGTTCA	TGAACCCTTTTTTCGC	-0.21066	NA	-0.420726	-1.4918	-2.48209	0.577754	NA
AAAAAGGT	ACCTTTTT	3.10582	ACAAAAAAAGGTGTCG	CGACACCTTTTTTTGT	NA	CGCAAAAAAGGTCATA	TATGACCTTTTTTGCG	5.59834	AGTAAAAAAGGTCATC	GATGACCTTTTTTACT	0.916865	GCATAAAAAGGTACTT	AAGTACCTTTTTATGC	0.573454	GCAGAAAAAGGTAGTA	TACTACCTTTTTCTGC	2.14069	GTAAAAAAAGGTTATA	TATAACCTTTTTTTAC	2.39796	GCGAAAAAAGGTTTCA	TGAAACCTTTTTTCGC	-0.994458	NA	0.315867	-1.76086	-2.90439	-0.636118	-0.337973
AAAAAGTA	TACTTTTT	4.07609	ACAAAAAAAGTAGTCG	CGACTACTTTTTTTGT	NA	CGCAAAAAAGTACATA	TATGTACTTTTTTGCG	5.39406	AGTAAAAAAGTACATC	GATGTACTTTTTTACT	1.95951	GCATAAAAAGTAACTT	AAGTTACTTTTTATGC	3.297	GCAGAAAAAGTAAGTA	TACTTACTTTTTCTGC	2.10353	GTAAAAAAAGTATATA	TATATACTTTTTTTAC	NA	GCGAAAAAAGTATTCA	TGAATACTTTTTTCGC	0.388178	NA	0.075353	-0.707542	-0.634002	-0.670662	NA
AAAAAGTC	GACTTTTT	4.34208	ACAAAAAAAGTCGTCG	CGACGACTTTTTTTGT	NA	CGCAAAAAAGTCCATA	TATGGACTTTTTTGCG	5.12629	AGTAAAAAAGTCCATC	GATGGACTTTTTTACT	3.08882	GCATAAAAAGTCACTT	AAGTGACTTTTTATGC	1.81333	GCAGAAAAAGTCAGTA	TACTGACTTTTTCTGC	4.32539	GTAAAAAAAGTCTATA	TATAGACTTTTTTTAC	1.65013	GCGAAAAAAGTCTTCA	TGAAGACTTTTTTCGC	0.767213	NA	-0.239919	0.433324	-1.87081	1.39502	-1.1142
AAAAAGTG	CACTTTTT	4.35615	ACAAAAAAAGTGGTCG	CGACCACTTTTTTTGT	NA	CGCAAAAAAGTGCATA	TATGCACTTTTTTGCG	4.48336	AGTAAAAAAGTGCATC	GATGCACTTTTTTACT	2.78056	GCATAAAAAGTGACTT	AAGTCACTTTTTATGC	3.25245	GCAGAAAAAGTGAGTA	TACTCACTTTTTCTGC	3.28708	GTAAAAAAAGTGTATA	TATACACTTTTTTTAC	1.96737	GCGAAAAAAGTGTTCA	TGAACACTTTTTTCGC	0.787271	NA	-0.996901	0.121906	-0.671142	0.429697	-0.784909
AAAAAGTT	AACTTTTT	4.43304	ACAAAAAAAGTTGTCG	CGACAACTTTTTTTGT	NA	CGCAAAAAAGTTCATA	TATGAACTTTTTTGCG	4.99738	AGTAAAAAAGTTCATC	GATGAACTTTTTTACT	0.302187	GCATAAAAAGTTACTT	AAGTAACTTTTTATGC	NA	GCAGAAAAAGTTAGTA	TACTAACTTTTTCTGC	2.82123	GTAAAAAAAGTTTATA	TATAAACTTTTTTTAC	2.31448	GCGAAAAAAGTTTTCA	TGAAAACTTTTTTCGC	0.896829	NA	-0.391701	-2.38183	NA	-0.00341052	-0.424615
AAAAATAA	TTATTTTT	4.12297	ACAAAAAAATAAGTCG	CGACTTATTTTTTTGT	NA	CGCAAAAAATAACATA	TATGTTATTTTTTGCG	5.38581	AGTAAAAAATAACATC	GATGTTATTTTTTACT	3.19344	GCATAAAAATAAACTT	AAGTTTATTTTTATGC	5.19173	GCAGAAAAATAAAGTA	TACTTTATTTTTCTGC	NA	GTAAAAAAATAATATA	TATATTATTTTTTTAC	NA	GCGAAAAAATAATTCA	TGAATTATTTTTTCGC	0.454978	NA	0.0656326	0.539017	0.945468	NA	NA
AAAAATAC	GTATTTTT	4.57686	ACAAAAAAATACGTCG	CGACGTATTTTTTTGT	NA	CGCAAAAAATACCATA	TATGGTATTTTTTGCG	5.85193	AGTAAAAAATACCATC	GATGGTATTTTTTACT	2.37201	GCATAAAAATACACTT	AAGTGTATTTTTATGC	4.01299	GCAGAAAAATACAGTA	TACTGTATTTTTCTGC	NA	GTAAAAAAATACTATA	TATAGTATTTTTTTAC	NA	GCGAAAAAATACTTCA	TGAAGTATTTTTTCGC	1.10178	NA	0.614433	-0.290821	-0.0371491	NA	NA
AAAAATAG	CTATTTTT	4.13834	ACAAAAAAATAGGTCG	CGACCTATTTTTTTGT	NA	CGCAAAAAATAGCATA	TATGCTATTTTTTGCG	6.00897	AGTAAAAAATAGCATC	GATGCTATTTTTTACT	2.10859	GCATAAAAATAGACTT	AAGTCTATTTTTATGC	2.71279	GCAGAAAAATAGAGTA	TACTCTATTTTTCTGC	3.56837	GTAAAAAAATAGTATA	TATACTATTTTTTTAC	1.08581	GCGAAAAAATAGTTCA	TGAACTATTTTTTCGC	0.476884	NA	0.799334	-0.556933	-1.12101	0.691208	-1.69996
AAAAATAT	ATATTTTT	4.53207	ACAAAAAAATATGTCG	CGACATATTTTTTTGT	NA	CGCAAAAAATATCATA	TATGATATTTTTTGCG	5.53276	AGTAAAAAATATCATC	GATGATATTTTTTACT	1.78877	GCATAAAAATATACTT	AAGTATATTTTTATGC	4.17246	GCAGAAAAATATAGTA	TACTATATTTTTCTGC	NA	GTAAAAAAATATTATA	TATAATATTTTTTTAC	2.47954	GCGAAAAAATATTTCA	TGAAATATTTTTTCGC	1.03796	NA	0.238646	-0.880026	0.0957891	NA	-0.253288
AAAAATCA	TGATTTTT	4.15361	ACAAAAAAATCAGTCG	CGACTGATTTTTTTGT	NA	CGCAAAAAATCACATA	TATGTGATTTTTTGCG	5.70818	AGTAAAAAATCACATC	GATGTGATTTTTTACT	2.13045	GCATAAAAATCAACTT	AAGTTGATTTTTATGC	3.3408	GCAGAAAAATCAAGTA	TACTTGATTTTTCTGC	2.62443	GTAAAAAAATCATATA	TATATGATTTTTTTAC	NA	GCGAAAAAATCATTCA	TGAATGATTTTTTCGC	0.498644	NA	0.445185	-0.534855	-0.597494	-0.186373	NA
AAAAATCC	GGATTTTT	4.71357	ACAAAAAAATCCGTCG	CGACGGATTTTTTTGT	NA	CGCAAAAAATCCCATA	TATGGGATTTTTTGCG	6.24905	AGTAAAAAATCCCATC	GATGGGATTTTTTACT	2.04184	GCATAAAAATCCACTT	AAGTGGATTTTTATGC	3.87271	GCAGAAAAATCCAGTA	TACTGGATTTTTCTGC	2.75132	GTAAAAAAATCCTATA	TATAGGATTTTTTTAC	NA	GCGAAAAAATCCTTCA	TGAAGGATTTTTTCGC	1.29659	NA	1.082	-0.624371	-0.154082	-0.0684094	NA
AAAAATCG	CGATTTTT	4.59415	ACAAAAAAATCGGTCG	CGACCGATTTTTTTGT	NA	CGCAAAAAATCGCATA	TATGCGATTTTTTGCG	5.48616	AGTAAAAAATCGCATC	GATGCGATTTTTTACT	3.5727	GCATAAAAATCGACTT	AAGTCGATTTTTATGC	3.4283	GCAGAAAAATCGAGTA	TACTCGATTTTTCTGC	3.42855	GTAAAAAAATCGTATA	TATACGATTTTTTTAC	NA	GCGAAAAAATCGTTCA	TGAACGATTTTTTCGC	1.12641	NA	0.183791	0.922161	-0.524548	0.561217	NA
AAAAATCT	AGATTTTT	4.70856	ACAAAAAAATCTGTCG	CGACAGATTTTTTTGT	NA	CGCAAAAAATCTCATA	TATGAGATTTTTTGCG	5.96401	AGTAAAAAATCTCATC	GATGAGATTTTTTACT	3.04196	GCATAAAAATCTACTT	AAGTAGATTTTTATGC	3.94589	GCAGAAAAATCTAGTA	TACTAGATTTTTCTGC	NA	GTAAAAAAATCTTATA	TATAAGATTTTTTTAC	3.23235	GCGAAAAAATCTTTCA	TGAAAGATTTTTTCGC	1.28946	NA	0.746397	0.385988	-0.0930775	NA	0.528105
AAAAATGA	TCATTTTT	4.74326	ACAAAAAAATGAGTCG	CGACTCATTTTTTTGT	NA	CGCAAAAAATGACATA	TATGTCATTTTTTGCG	5.78737	AGTAAAAAATGACATC	GATGTCATTTTTTACT	2.27509	GCATAAAAATGAACTT	AAGTTCATTTTTATGC	3.34735	GCAGAAAAATGAAGTA	TACTTCATTTTTCTGC	4.77659	GTAAAAAAATGATATA	TATATCATTTTTTTAC	3.52995	GCGAAAAAATGATTCA	TGAATCATTTTTTCGC	1.33889	NA	0.53842	-0.388735	-0.592029	1.8145	0.837007
AAAAATGC	GCATTTTT	4.75081	ACAAAAAAATGCGTCG	CGACGCATTTTTTTGT	NA	CGCAAAAAATGCCATA	TATGGCATTTTTTGCG	6.44149	AGTAAAAAATGCCATC	GATGGCATTTTTTACT	NA	GCATAAAAATGCACTT	AAGTGCATTTTTATGC	NA	GCAGAAAAATGCAGTA	TACTGCATTTTTCTGC	1.82079	GTAAAAAAATGCTATA	TATAGCATTTTTTTAC	3.81628	GCGAAAAAATGCTTCA	TGAAGCATTTTTTCGC	1.34966	NA	1.30858	NA	NA	-0.933523	1.13421
AAAAATGG	CCATTTTT	3.90384	ACAAAAAAATGGGTCG	CGACCCATTTTTTTGT	NA	CGCAAAAAATGGCATA	TATGCCATTTTTTGCG	5.4138	AGTAAAAAATGGCATC	GATGCCATTTTTTACT	1.77482	GCATAAAAATGGACTT	AAGTCCATTTTTATGC	0.90272	GCAGAAAAATGGAGTA	TACTCCATTTTTCTGC	2.1253	GTAAAAAAATGGTATA	TATACCATTTTTTTAC	2.74745	GCGAAAAAATGGTTCA	TGAACCATTTTTTCGC	0.142724	NA	0.0985941	-0.894128	-2.62991	-0.650424	0.0247919
AAAAATGT	ACATTTTT	4.82721	ACAAAAAAATGTGTCG	CGACACATTTTTTTGT	NA	CGCAAAAAATGTCATA	TATGACATTTTTTGCG	5.35152	AGTAAAAAATGTCATC	GATGACATTTTTTACT	2.65655	GCATAAAAATGTACTT	AAGTACATTTTTATGC	4.58995	GCAGAAAAATGTAGTA	TACTACATTTTTCTGC	2.69147	GTAAAAAAATGTTATA	TATAACATTTTTTTAC	3.01913	GCGAAAAAATGTTTCA	TGAAACATTTTTTCGC	1.45852	NA	0.0252636	-0.00337202	0.443821	-0.124053	0.306788
AAAAATTA	TAATTTTT	4.15623	ACAAAAAAATTAGTCG	CGACTAATTTTTTTGT	NA	CGCAAAAAATTACATA	TATGTAATTTTTTGCG	5.57831	AGTAAAAAATTACATC	GATGTAATTTTTTACT	1.66645	GCATAAAAATTAACTT	AAGTTAATTTTTATGC	2.65126	GCAGAAAAATTAAGTA	TACTTAATTTTTCTGC	3.311	GTAAAAAAATTATATA	TATATAATTTTTTTAC	3.07629	GCGAAAAAATTATTCA	TGAATAATTTTTTCGC	0.502383	NA	0.292283	-1.0036	-1.1723	0.451929	0.366127
AAAAATTC	GAATTTTT	4.40975	ACAAAAAAATTCGTCG	CGACGAATTTTTTTGT	NA	CGCAAAAAATTCCATA	TATGGAATTTTTTGCG	6.34041	AGTAAAAAATTCCATC	GATGGAATTTTTTACT	2.46089	GCATAAAAATTCACTT	AAGTGAATTTTTATGC	4.26418	GCAGAAAAATTCAGTA	TACTGAATTTTTCTGC	3.44632	GTAAAAAAATTCTATA	TATAGAATTTTTTTAC	3.19761	GCGAAAAAATTCTTCA	TGAAGAATTTTTTCGC	0.863644	NA	1.18957	-0.201031	0.172248	0.577738	0.492049
AAAAATTG	CAATTTTT	4	ACAAAAAAATTGGTCG	CGACCAATTTTTTTGT	NA	CGCAAAAAATTGCATA	TATGCAATTTTTTGCG	5.15952	AGTAAAAAATTGCATC	GATGCAATTTTTTACT	1.82404	GCATAAAAATTGACTT	AAGTCAATTTTTATGC	4.12273	GCAGAAAAATTGAGTA	TACTCAATTTTTCTGC	3.1022	GTAAAAAAATTGTATA	TATACAATTTTTTTAC	3.15716	GCGAAAAAATTGTTCA	TGAACAATTTTTTCGC	0.279755	NA	-0.200795	-0.844395	0.0543344	0.257806	0.450063
AAAAATTT	AAATTTTT	4.82579	ACAAAAAAATTTGTCG	CGACAAATTTTTTTGT	NA	CGCAAAAAATTTCATA	TATGAAATTTTTTGCG	5.09156	AGTAAAAAATTTCATC	GATGAAATTTTTTACT	3.08795	GCATAAAAATTTACTT	AAGTAAATTTTTATGC	4.48554	GCAGAAAAATTTAGTA	TACTAAATTTTTCTGC	4.13023	GTAAAAAAATTTTATA	TATAAAATTTTTTTAC	3.68308	GCGAAAAAATTTTTCA	TGAAAAATTTTTTCGC	1.4565	NA	-0.280811	0.432443	0.356775	1.21358	0.995956
AAAACAAA	TTTGTTTT	4.50056	ACAAAAAACAAAGTCG	CGACTTTGTTTTTTGT	NA	CGCAAAAACAAACATA	TATGTTTGTTTTTGCG	5.44631	AGTAAAAACAAACATC	GATGTTTGTTTTTACT	3.78502	GCATAAAACAAAACTT	AAGTTTTGTTTTATGC	2.10459	GCAGAAAACAAAAGTA	TACTTTTGTTTTCTGC	NA	GTAAAAAACAAATATA	TATATTTGTTTTTTAC	NA	GCGAAAAACAAATTCA	TGAATTTGTTTTTCGC	0.993043	NA	0.136871	1.13665	-1.62802	NA	NA
AAAACAAC	GTTGTTTT	3.95158	ACAAAAAACAACGTCG	CGACGTTGTTTTTTGT	NA	CGCAAAAACAACCATA	TATGGTTGTTTTTGCG	5.00744	AGTAAAAACAACCATC	GATGGTTGTTTTTACT	2.0536	GCATAAAACAACACTT	AAGTGTTGTTTTATGC	3.90166	GCAGAAAACAACAGTA	TACTGTTGTTTTCTGC	NA	GTAAAAAACAACTATA	TATAGTTGTTTTTTAC	NA	GCGAAAAACAACTTCA	TGAAGTTGTTTTTCGC	0.210758	NA	-0.379847	-0.61249	-0.129948	NA	NA
AAAACAAG	CTTGTTTT	4.05916	ACAAAAAACAAGGTCG	CGACCTTGTTTTTTGT	NA	CGCAAAAACAAGCATA	TATGCTTGTTTTTGCG	5.92841	AGTAAAAACAAGCATC	GATGCTTGTTTTTACT	NA	GCATAAAACAAGACTT	AAGTCTTGTTTTATGC	4.43839	GCAGAAAACAAGAGTA	TACTCTTGTTTTCTGC	3.25894	GTAAAAAACAAGTATA	TATACTTGTTTTTTAC	2.21837	GCGAAAAACAAGTTCA	TGAACTTGTTTTTCGC	0.364059	NA	0.704479	NA	0.317472	0.403531	-0.524377
AAAACAAT	ATTGTTTT	4.98166	ACAAAAAACAATGTCG	CGACATTGTTTTTTGT	4.65639	CGCAAAAACAATCATA	TATGATTGTTTTTGCG	5.11892	AGTAAAAACAATCATC	GATGATTGTTTTTACT	NA	GCATAAAACAATACTT	AAGTATTGTTTTATGC	NA	GCAGAAAACAATAGTA	TACTATTGTTTTCTGC	NA	GTAAAAAACAATTATA	TATAATTGTTTTTTAC	2.28605	GCGAAAAACAATTTCA	TGAAATTGTTTTTCGC	1.67862	-0.297956	-0.248593	NA	NA	NA	-0.454125
AAAACACA	TGTGTTTT	4.84374	ACAAAAAACACAGTCG	CGACTGTGTTTTTTGT	4.99425	CGCAAAAACACACATA	TATGTGTGTTTTTGCG	5.38843	AGTAAAAACACACATC	GATGTGTGTTTTTACT	3.077	GCATAAAACACAACTT	AAGTTGTGTTTTATGC	NA	GCAGAAAACACAAGTA	TACTTGTGTTTTCTGC	NA	GTAAAAAACACATATA	TATATGTGTTTTTTAC	NA	GCGAAAAACACATTCA	TGAATGTGTTTTTCGC	1.48208	0.152183	0.0687226	0.421385	NA	NA	NA
AAAACACC	GGTGTTTT	3.49629	ACAAAAAACACCGTCG	CGACGGTGTTTTTTGT	NA	CGCAAAAACACCCATA	TATGGGTGTTTTTGCG	5.14068	AGTAAAAACACCCATC	GATGGGTGTTTTTACT	1.82761	GCATAAAACACCACTT	AAGTGGTGTTTTATGC	NA	GCAGAAAACACCAGTA	TACTGGTGTTTTCTGC	NA	GTAAAAAACACCTATA	TATAGGTGTTTTTTAC	NA	GCGAAAAACACCTTCA	TGAAGGTGTTTTTCGC	-0.438033	NA	-0.222975	-0.840795	NA	NA	NA
AAAACACG	CGTGTTTT	4.00975	ACAAAAAACACGGTCG	CGACCGTGTTTTTTGT	NA	CGCAAAAACACGCATA	TATGCGTGTTTTTGCG	6.08741	AGTAAAAACACGCATC	GATGCGTGTTTTTACT	1.38282	GCATAAAACACGACTT	AAGTCGTGTTTTATGC	NA	GCAGAAAACACGAGTA	TACTCGTGTTTTCTGC	NA	GTAAAAAACACGTATA	TATACGTGTTTTTTAC	NA	GCGAAAAACACGTTCA	TGAACGTGTTTTTCGC	0.293645	NA	0.89169	-1.29013	NA	NA	NA
AAAACACT	AGTGTTTT	3.9548	ACAAAAAACACTGTCG	CGACAGTGTTTTTTGT	NA	CGCAAAAACACTCATA	TATGAGTGTTTTTGCG	5.66214	AGTAAAAACACTCATC	GATGAGTGTTTTTACT	2.07067	GCATAAAACACTACTT	AAGTAGTGTTTTATGC	NA	GCAGAAAACACTAGTA	TACTAGTGTTTTCTGC	NA	GTAAAAAACACTTATA	TATAAGTGTTTTTTAC	NA	GCGAAAAACACTTTCA	TGAAAGTGTTTTTCGC	0.21534	NA	0.39098	-0.595246	NA	NA	NA
AAAACAGA	TCTGTTTT	4.53083	ACAAAAAACAGAGTCG	CGACTCTGTTTTTTGT	NA	CGCAAAAACAGACATA	TATGTCTGTTTTTGCG	5.81134	AGTAAAAACAGACATC	GATGTCTGTTTTTACT	3.17561	GCATAAAACAGAACTT	AAGTTCTGTTTTATGC	NA	GCAGAAAACAGAAGTA	TACTTCTGTTTTCTGC	NA	GTAAAAAACAGATATA	TATATCTGTTTTTTAC	2.9207	GCGAAAAACAGATTCA	TGAATCTGTTTTTCGC	1.03618	NA	0.566651	0.521001	NA	NA	0.204623
AAAACAGC	GCTGTTTT	3.9365	ACAAAAAACAGCGTCG	CGACGCTGTTTTTTGT	NA	CGCAAAAACAGCCATA	TATGGCTGTTTTTGCG	5.36747	AGTAAAAACAGCCATC	GATGGCTGTTTTTACT	2.66586	GCATAAAACAGCACTT	AAGTGCTGTTTTATGC	3.23235	GCAGAAAACAGCAGTA	TACTGCTGTTTTCTGC	NA	GTAAAAAACAGCTATA	TATAGCTGTTTTTTAC	NA	GCGAAAAACAGCTTCA	TGAAGCTGTTTTTCGC	0.189258	NA	0.0440449	0.00603673	-0.687902	NA	NA
AAAACAGG	CCTGTTTT	3.39123	ACAAAAAACAGGGTCG	CGACCCTGTTTTTTGT	4.90845	CGCAAAAACAGGCATA	TATGCCTGTTTTTGCG	5.66085	AGTAAAAACAGGCATC	GATGCCTGTTTTTACT	NA	GCATAAAACAGGACTT	AAGTCCTGTTTTATGC	NA	GCAGAAAACAGGAGTA	TACTCCTGTTTTCTGC	NA	GTAAAAAACAGGTATA	TATACCTGTTTTTTAC	3.20304	GCGAAAAACAGGTTCA	TGAACCTGTTTTTCGC	-0.587742	0.0378744	0.389462	NA	NA	NA	0.497687
AAAACAGT	ACTGTTTT	4.00605	ACAAAAAACAGTGTCG	CGACACTGTTTTTTGT	3.6605	CGCAAAAACAGTCATA	TATGACTGTTTTTGCG	5.71764	AGTAAAAACAGTCATC	GATGACTGTTTTTACT	2.43844	GCATAAAACAGTACTT	AAGTACTGTTTTATGC	4.54821	GCAGAAAACAGTAGTA	TACTACTGTTTTCTGC	NA	GTAAAAAACAGTTATA	TATAACTGTTTTTTAC	2.11448	GCGAAAAACAGTTTCA	TGAAACTGTTTTTCGC	0.288366	-1.62483	0.45633	-0.223716	0.40902	NA	-0.632212
AAAACATA	TATGTTTT	4.53418	ACAAAAAACATAGTCG	CGACTATGTTTTTTGT	NA	CGCAAAAACATACATA	TATGTATGTTTTTGCG	NA	AGTAAAAACATACATC	GATGTATGTTTTTACT	2.8419	GCATAAAACATAACTT	AAGTTATGTTTTATGC	4.53767	GCAGAAAACATAAGTA	TACTTATGTTTTCTGC	NA	GTAAAAAACATATATA	TATATATGTTTTTTAC	NA	GCGAAAAACATATTCA	TGAATATGTTTTTCGC	1.04096	NA	NA	0.183878	0.400236	NA	NA
AAAACATC	GATGTTTT	4.4032	ACAAAAAACATCGTCG	CGACGATGTTTTTTGT	NA	CGCAAAAACATCCATA	TATGGATGTTTTTGCG	5.56325	AGTAAAAACATCCATC	GATGGATGTTTTTACT	NA	GCATAAAACATCACTT	AAGTGATGTTTTATGC	4.28748	GCAGAAAACATCAGTA	TACTGATGTTTTCTGC	NA	GTAAAAAACATCTATA	TATAGATGTTTTTTAC	NA	GCGAAAAACATCTTCA	TGAAGATGTTTTTCGC	0.854309	NA	0.274549	NA	0.191675	NA	NA
AAAACATG	CATGTTTT	3.09929	ACAAAAAACATGGTCG	CGACCATGTTTTTTGT	NA	CGCAAAAACATGCATA	TATGCATGTTTTTGCG	5.87581	AGTAAAAACATGCATC	GATGCATGTTTTTACT	3.25021	GCATAAAACATGACTT	AAGTCATGTTTTATGC	5.41454	GCAGAAAACATGAGTA	TACTCATGTTTTCTGC	3.90123	GTAAAAAACATGTATA	TATACATGTTTTTTAC	3.0013	GCGAAAAACATGTTCA	TGAACATGTTTTTCGC	-1.00375	NA	0.642557	0.596364	1.1312	1.00068	0.288287
AAAACATT	AATGTTTT	4.30277	ACAAAAAACATTGTCG	CGACAATGTTTTTTGT	NA	CGCAAAAACATTCATA	TATGAATGTTTTTGCG	5.50067	AGTAAAAACATTCATC	GATGAATGTTTTTACT	1.88445	GCATAAAACATTACTT	AAGTAATGTTTTATGC	4.23381	GCAGAAAACATTAGTA	TACTAATGTTTTCTGC	NA	GTAAAAAACATTTATA	TATAAATGTTTTTTAC	1.37957	GCGAAAAACATTTTCA	TGAAAATGTTTTTCGC	0.711202	NA	0.200869	-0.783367	0.146932	NA	-1.39503
AAAACCAA	TTGGTTTT	4.63139	ACAAAAAACCAAGTCG	CGACTTGGTTTTTTGT	NA	CGCAAAAACCAACATA	TATGTTGGTTTTTGCG	NA	AGTAAAAACCAACATC	GATGTTGGTTTTTACT	NA	GCATAAAACCAAACTT	AAGTTTGGTTTTATGC	3.53542	GCAGAAAACCAAAGTA	TACTTTGGTTTTCTGC	NA	GTAAAAAACCAATATA	TATATTGGTTTTTTAC	NA	GCGAAAAACCAATTCA	TGAATTGGTTTTTCGC	1.17948	NA	NA	NA	-0.435254	NA	NA
AAAACCAC	GTGGTTTT	4.42199	ACAAAAAACCACGTCG	CGACGTGGTTTTTTGT	NA	CGCAAAAACCACCATA	TATGGTGGTTTTTGCG	NA	AGTAAAAACCACCATC	GATGGTGGTTTTTACT	NA	GCATAAAACCACACTT	AAGTGTGGTTTTATGC	NA	GCAGAAAACCACAGTA	TACTGTGGTTTTCTGC	NA	GTAAAAAACCACTATA	TATAGTGGTTTTTTAC	NA	GCGAAAAACCACTTCA	TGAAGTGGTTTTTCGC	0.881086	NA	NA	NA	NA	NA	NA
AAAACCAG	CTGGTTTT	3.72606	ACAAAAAACCAGGTCG	CGACCTGGTTTTTTGT	NA	CGCAAAAACCAGCATA	TATGCTGGTTTTTGCG	5.2646	AGTAAAAACCAGCATC	GATGCTGGTTTTTACT	NA	GCATAAAACCAGACTT	AAGTCTGGTTTTATGC	3.31661	GCAGAAAACCAGAGTA	TACTCTGGTTTTCTGC	NA	GTAAAAAACCAGTATA	TATACTGGTTTTTTAC	NA	GCGAAAAACCAGTTCA	TGAACTGGTTTTTCGC	-0.110606	NA	-0.0770781	NA	-0.617656	NA	NA
AAAACCAT	ATGGTTTT	3.63881	ACAAAAAACCATGTCG	CGACATGGTTTTTTGT	4.76292	CGCAAAAACCATCATA	TATGATGGTTTTTGCG	4.73179	AGTAAAAACCATCATC	GATGATGGTTTTTACT	1.80936	GCATAAAACCATACTT	AAGTATGGTTTTATGC	3.9915	GCAGAAAACCATAGTA	TACTATGGTTTTCTGC	NA	GTAAAAAACCATTATA	TATAATGGTTTTTTAC	1.56394	GCGAAAAACCATTTCA	TGAAATGGTTTTTCGC	-0.234938	-0.156022	-0.704397	-0.859232	-0.0550556	NA	-1.20366
AAAACCCA	TGGGTTTT	4.33082	ACAAAAAACCCAGTCG	CGACTGGGTTTTTTGT	NA	CGCAAAAACCCACATA	TATGTGGGTTTTTGCG	5.33958	AGTAAAAACCCACATC	GATGTGGGTTTTTACT	2.2436	GCATAAAACCCAACTT	AAGTTGGGTTTTATGC	NA	GCAGAAAACCCAAGTA	TACTTGGGTTTTCTGC	NA	GTAAAAAACCCATATA	TATATGGGTTTTTTAC	NA	GCGAAAAACCCATTCA	TGAATGGGTTTTTCGC	0.751168	NA	0.0112085	-0.420549	NA	NA	NA
AAAACCCC	GGGGTTTT	4.86004	ACAAAAAACCCCGTCG	CGACGGGGTTTTTTGT	NA	CGCAAAAACCCCCATA	TATGGGGGTTTTTGCG	NA	AGTAAAAACCCCCATC	GATGGGGGTTTTTACT	NA	GCATAAAACCCCACTT	AAGTGGGGTTTTATGC	NA	GCAGAAAACCCCAGTA	TACTGGGGTTTTCTGC	NA	GTAAAAAACCCCTATA	TATAGGGGTTTTTTAC	NA	GCGAAAAACCCCTTCA	TGAAGGGGTTTTTCGC	1.50531	NA	NA	NA	NA	NA	NA
AAAACCCG	CGGGTTTT	3.39478	ACAAAAAACCCGGTCG	CGACCGGGTTTTTTGT	NA	CGCAAAAACCCGCATA	TATGCGGGTTTTTGCG	5.71101	AGTAAAAACCCGCATC	GATGCGGGTTTTTACT	NA	GCATAAAACCCGACTT	AAGTCGGGTTTTATGC	4.80713	GCAGAAAACCCGAGTA	TACTCGGGTTTTCTGC	NA	GTAAAAAACCCGTATA	TATACGGGTTTTTTAC	NA	GCGAAAAACCCGTTCA	TGAACGGGTTTTTCGC	-0.582684	NA	0.448517	NA	0.624859	NA	NA
AAAACCCT	AGGGTTTT	3.95653	ACAAAAAACCCTGTCG	CGACAGGGTTTTTTGT	NA	CGCAAAAACCCTCATA	TATGAGGGTTTTTGCG	6.14136	AGTAAAAACCCTCATC	GATGAGGGTTTTTACT	NA	GCATAAAACCCTACTT	AAGTAGGGTTTTATGC	3.88077	GCAGAAAACCCTAGTA	TACTAGGGTTTTCTGC	NA	GTAAAAAACCCTTATA	TATAAGGGTTTTTTAC	NA	GCGAAAAACCCTTTCA	TGAAAGGGTTTTTCGC	0.217806	NA	0.955204	NA	-0.147368	NA	NA
AAAACCGA	TCGGTTTT	3.45298	ACAAAAAACCGAGTCG	CGACTCGGTTTTTTGT	NA	CGCAAAAACCGACATA	TATGTCGGTTTTTGCG	5.05735	AGTAAAAACCGACATC	GATGTCGGTTTTTACT	2.79185	GCATAAAACCGAACTT	AAGTTCGGTTTTATGC	3.26689	GCAGAAAACCGAAGTA	TACTTCGGTTTTCTGC	NA	GTAAAAAACCGATATA	TATATCGGTTTTTTAC	NA	GCGAAAAACCGATTCA	TGAATCGGTTTTTCGC	-0.499748	NA	-0.321084	0.133318	-0.659108	NA	NA
AAAACCGC	GCGGTTTT	3.92895	ACAAAAAACCGCGTCG	CGACGCGGTTTTTTGT	NA	CGCAAAAACCGCCATA	TATGGCGGTTTTTGCG	3.95758	AGTAAAAACCGCCATC	GATGGCGGTTTTTACT	2.73072	GCATAAAACCGCACTT	AAGTGCGGTTTTATGC	3.9636	GCAGAAAACCGCAGTA	TACTGCGGTTTTCTGC	NA	GTAAAAAACCGCTATA	TATAGCGGTTTTTTAC	NA	GCGAAAAACCGCTTCA	TGAAGCGGTTTTTCGC	0.178507	NA	-1.61594	0.0715573	-0.0783133	NA	NA
AAAACCGG	CCGGTTTT	3.9816	ACAAAAAACCGGGTCG	CGACCCGGTTTTTTGT	NA	CGCAAAAACCGGCATA	TATGCCGGTTTTTGCG	5.40947	AGTAAAAACCGGCATC	GATGCCGGTTTTTACT	2.08803	GCATAAAACCGGACTT	AAGTCCGGTTTTATGC	2.96012	GCAGAAAACCGGAGTA	TACTCCGGTTTTCTGC	1.4281	GTAAAAAACCGGTATA	TATACCGGTTTTTTAC	NA	GCGAAAAACCGGTTCA	TGAACCGGTTTTTCGC	0.253532	NA	0.093492	-0.577705	-0.914834	-1.29861	NA
AAAACCGT	ACGGTTTT	3.25822	ACAAAAAACCGTGTCG	CGACACGGTTTTTTGT	NA	CGCAAAAACCGTCATA	TATGACGGTTTTTGCG	5.50868	AGTAAAAACCGTCATC	GATGACGGTTTTTACT	2.71875	GCATAAAACCGTACTT	AAGTACGGTTTTATGC	NA	GCAGAAAACCGTAGTA	TACTACGGTTTTCTGC	2.14456	GTAAAAAACCGTTATA	TATAACGGTTTTTTAC	0.841845	GCGAAAAACCGTTTCA	TGAAACGGTTTTTCGC	-0.777281	NA	0.210305	0.0594627	NA	-0.632518	-1.95318
AAAACCTA	TAGGTTTT	4.08751	ACAAAAAACCTAGTCG	CGACTAGGTTTTTTGT	NA	CGCAAAAACCTACATA	TATGTAGGTTTTTGCG	4.91246	AGTAAAAACCTACATC	GATGTAGGTTTTTACT	NA	GCATAAAACCTAACTT	AAGTTAGGTTTTATGC	2.62805	GCAGAAAACCTAAGTA	TACTTAGGTTTTCTGC	NA	GTAAAAAACCTATATA	TATATAGGTTTTTTAC	NA	GCGAAAAACCTATTCA	TGAATAGGTTTTTCGC	0.40445	NA	-0.491686	NA	-1.19165	NA	NA
AAAACCTC	GAGGTTTT	3.59411	ACAAAAAACCTCGTCG	CGACGAGGTTTTTTGT	NA	CGCAAAAACCTCCATA	TATGGAGGTTTTTGCG	4.96672	AGTAAAAACCTCCATC	GATGGAGGTTTTTACT	3.27035	GCATAAAACCTCACTT	AAGTGAGGTTTTATGC	NA	GCAGAAAACCTCAGTA	TACTGAGGTTTTCTGC	NA	GTAAAAAACCTCTATA	TATAGAGGTTTTTTAC	NA	GCGAAAAACCTCTTCA	TGAAGAGGTTTTTCGC	-0.298639	NA	-0.4278	0.61671	NA	NA	NA
AAAACCTG	CAGGTTTT	3.24514	ACAAAAAACCTGGTCG	CGACCAGGTTTTTTGT	NA	CGCAAAAACCTGCATA	TATGCAGGTTTTTGCG	4.45954	AGTAAAAACCTGCATC	GATGCAGGTTTTTACT	0.955303	GCATAAAACCTGACTT	AAGTCAGGTTTTATGC	NA	GCAGAAAACCTGAGTA	TACTCAGGTTTTCTGC	1.5875	GTAAAAAACCTGTATA	TATACAGGTTTTTTAC	1.09575	GCGAAAAACCTGTTCA	TGAACAGGTTTTTCGC	-0.795919	NA	-1.02494	-1.72203	NA	-1.15042	-1.68964
AAAACCTT	AAGGTTTT	4.61578	ACAAAAAACCTTGTCG	CGACAAGGTTTTTTGT	NA	CGCAAAAACCTTCATA	TATGAAGGTTTTTGCG	5.17596	AGTAAAAACCTTCATC	GATGAAGGTTTTTACT	1.77115	GCATAAAACCTTACTT	AAGTAAGGTTTTATGC	3.78274	GCAGAAAACCTTAGTA	TACTAAGGTTTTCTGC	NA	GTAAAAAACCTTTATA	TATAAAGGTTTTTTAC	NA	GCGAAAAACCTTTTCA	TGAAAAGGTTTTTCGC	1.15723	NA	-0.181436	-0.897835	-0.229085	NA	NA
AAAACGAA	TTCGTTTT	4.69969	ACAAAAAACGAAGTCG	CGACTTCGTTTTTTGT	NA	CGCAAAAACGAACATA	TATGTTCGTTTTTGCG	5.26966	AGTAAAAACGAACATC	GATGTTCGTTTTTACT	1.8684	GCATAAAACGAAACTT	AAGTTTCGTTTTATGC	2.06997	GCAGAAAACGAAAGTA	TACTTTCGTTTTCTGC	NA	GTAAAAAACGAATATA	TATATTCGTTTTTTAC	1.9001	GCGAAAAACGAATTCA	TGAATTCGTTTTTCGC	1.27681	NA	-0.071117	-0.799588	-1.65688	NA	-0.854741
AAAACGAC	GTCGTTTT	4.53987	ACAAAAAACGACGTCG	CGACGTCGTTTTTTGT	NA	CGCAAAAACGACCATA	TATGGTCGTTTTTGCG	5.1984	AGTAAAAACGACCATC	GATGGTCGTTTTTACT	1.44988	GCATAAAACGACACTT	AAGTGTCGTTTTATGC	NA	GCAGAAAACGACAGTA	TACTGTCGTTTTCTGC	3.16619	GTAAAAAACGACTATA	TATAGTCGTTTTTTAC	NA	GCGAAAAACGACTTCA	TGAAGTCGTTTTTCGC	1.04906	NA	-0.155021	-1.22239	NA	0.3173	NA
AAAACGAG	CTCGTTTT	4.89874	ACAAAAAACGAGGTCG	CGACCTCGTTTTTTGT	4.12018	CGCAAAAACGAGCATA	TATGCTCGTTTTTGCG	5.44315	AGTAAAAACGAGCATC	GATGCTCGTTTTTACT	3.05865	GCATAAAACGAGACTT	AAGTCTCGTTTTATGC	NA	GCAGAAAACGAGAGTA	TACTCTCGTTTTCTGC	3.51372	GTAAAAAACGAGTATA	TATACTCGTTTTTTAC	NA	GCGAAAAACGAGTTCA	TGAACTCGTTTTTCGC	1.56046	-1.01239	0.133141	0.402845	NA	0.640406	NA
AAAACGAT	ATCGTTTT	4.57776	ACAAAAAACGATGTCG	CGACATCGTTTTTTGT	NA	CGCAAAAACGATCATA	TATGATCGTTTTTGCG	5.76072	AGTAAAAACGATCATC	GATGATCGTTTTTACT	NA	GCATAAAACGATACTT	AAGTATCGTTTTATGC	4.75319	GCAGAAAACGATAGTA	TACTATCGTTTTCTGC	3.38332	GTAAAAAACGATTATA	TATAATCGTTTTTTAC	NA	GCGAAAAACGATTTCA	TGAAATCGTTTTTCGC	1.10305	NA	0.50705	NA	0.5799	0.519172	NA
AAAACGCA	TGCGTTTT	4.09391	ACAAAAAACGCAGTCG	CGACTGCGTTTTTTGT	NA	CGCAAAAACGCACATA	TATGTGCGTTTTTGCG	4.61824	AGTAAAAACGCACATC	GATGTGCGTTTTTACT	3.09655	GCATAAAACGCAACTT	AAGTTGCGTTTTATGC	4.09982	GCAGAAAACGCAAGTA	TACTTGCGTTTTCTGC	3.13018	GTAAAAAACGCATATA	TATATGCGTTTTTTAC	NA	GCGAAAAACGCATTCA	TGAATGCGTTTTTCGC	0.413567	NA	-0.83809	0.44113	0.0352373	0.283825	NA
AAAACGCC	GGCGTTTT	3.62344	ACAAAAAACGCCGTCG	CGACGGCGTTTTTTGT	NA	CGCAAAAACGCCCATA	TATGGGCGTTTTTGCG	5.24444	AGTAAAAACGCCCATC	GATGGGCGTTTTTACT	2.27069	GCATAAAACGCCACTT	AAGTGGCGTTTTATGC	NA	GCAGAAAACGCCAGTA	TACTGGCGTTTTCTGC	2.51668	GTAAAAAACGCCTATA	TATAGGCGTTTTTTAC	NA	GCGAAAAACGCCTTCA	TGAAGGCGTTTTTCGC	-0.256848	NA	-0.100818	-0.393183	NA	-0.286551	NA
AAAACGCG	CGCGTTTT	3.9358	ACAAAAAACGCGGTCG	CGACCGCGTTTTTTGT	NA	CGCAAAAACGCGCATA	TATGCGCGTTTTTGCG	5.96255	AGTAAAAACGCGCATC	GATGCGCGTTTTTACT	2.08468	GCATAAAACGCGACTT	AAGTCGCGTTTTATGC	4.53287	GCAGAAAACGCGAGTA	TACTCGCGTTTTCTGC	3.97842	GTAAAAAACGCGTATA	TATACGCGTTTTTTAC	2.41074	GCGAAAAACGCGTTCA	TGAACGCGTTTTTCGC	0.188272	NA	0.744685	-0.581087	0.396235	1.07244	-0.324706
AAAACGCT	AGCGTTTT	3.93175	ACAAAAAACGCTGTCG	CGACAGCGTTTTTTGT	NA	CGCAAAAACGCTCATA	TATGAGCGTTTTTGCG	5.34709	AGTAAAAACGCTCATC	GATGAGCGTTTTTACT	1.58081	GCATAAAACGCTACTT	AAGTAGCGTTTTATGC	NA	GCAGAAAACGCTAGTA	TACTAGCGTTTTCTGC	3.04835	GTAAAAAACGCTTATA	TATAAGCGTTTTTTAC	NA	GCGAAAAACGCTTTCA	TGAAAGCGTTTTTCGC	0.182491	NA	0.0200513	-1.09011	NA	0.207745	NA
AAAACGGA	TCCGTTTT	2.44523	ACAAAAAACGGAGTCG	CGACTCCGTTTTTTGT	NA	CGCAAAAACGGACATA	TATGTCCGTTTTTGCG	4.75435	AGTAAAAACGGACATC	GATGTCCGTTTTTACT	2.66917	GCATAAAACGGAACTT	AAGTTCCGTTTTATGC	7.10883	GCAGAAAACGGAAGTA	TACTTCCGTTTTCTGC	4.29915	GTAAAAAACGGATATA	TATATCCGTTTTTTAC	NA	GCGAAAAACGGATTCA	TGAATCCGTTTTTCGC	-1.93579	NA	-0.677839	0.00937525	2.5436	1.37062	NA
AAAACGGC	GCCGTTTT	4.44176	ACAAAAAACGGCGTCG	CGACGCCGTTTTTTGT	4.65454	CGCAAAAACGGCCATA	TATGGCCGTTTTTGCG	4.14918	AGTAAAAACGGCCATC	GATGGCCGTTTTTACT	2.86662	GCATAAAACGGCACTT	AAGTGCCGTTTTATGC	NA	GCAGAAAACGGCAGTA	TACTGCCGTTTTCTGC	3.21295	GTAAAAAACGGCTATA	TATAGCCGTTTTTTAC	1.57213	GCGAAAAACGGCTTCA	TGAAGCCGTTTTTCGC	0.909262	-0.300422	-1.39035	0.208848	NA	0.360779	-1.19516
AAAACGGG	CCCGTTTT	4.26468	ACAAAAAACGGGGTCG	CGACCCCGTTTTTTGT	4.7729	CGCAAAAACGGGCATA	TATGCCCGTTTTTGCG	5.30349	AGTAAAAACGGGCATC	GATGCCCGTTTTTACT	2.44238	GCATAAAACGGGACTT	AAGTCCCGTTTTATGC	NA	GCAGAAAACGGGAGTA	TACTCCCGTTTTCTGC	2.72923	GTAAAAAACGGGTATA	TATACCCGTTTTTTAC	2.3705	GCGAAAAACGGGTTCA	TGAACCCGTTTTTCGC	0.656923	-0.142735	-0.0312922	-0.219735	NA	-0.0889406	-0.366472
AAAACGGT	ACCGTTTT	4.12064	ACAAAAAACGGTGTCG	CGACACCGTTTTTTGT	5.29959	CGCAAAAACGGTCATA	TATGACCGTTTTTGCG	4.9421	AGTAAAAACGGTCATC	GATGACCGTTTTTACT	1.94757	GCATAAAACGGTACTT	AAGTACCGTTTTATGC	4.05751	GCAGAAAACGGTAGTA	TACTACCGTTTTCTGC	2.03527	GTAAAAAACGGTTATA	TATAACCGTTTTTTAC	1.82273	GCGAAAAACGGTTTCA	TGAAACCGTTTTTCGC	0.451666	0.559011	-0.456781	-0.719606	-3.5908e-05	-0.734124	-0.93504
AAAACGTA	TACGTTTT	3.39522	ACAAAAAACGTAGTCG	CGACTACGTTTTTTGT	NA	CGCAAAAACGTACATA	TATGTACGTTTTTGCG	6.047	AGTAAAAACGTACATC	GATGTACGTTTTTACT	0.788107	GCATAAAACGTAACTT	AAGTTACGTTTTATGC	3.70639	GCAGAAAACGTAAGTA	TACTTACGTTTTCTGC	3.66184	GTAAAAAACGTATATA	TATATACGTTTTTTAC	NA	GCGAAAAACGTATTCA	TGAATACGTTTTTCGC	-0.582056	NA	0.844106	-1.89093	-0.292731	0.778109	NA
AAAACGTC	GACGTTTT	4.18701	ACAAAAAACGTCGTCG	CGACGACGTTTTTTGT	NA	CGCAAAAACGTCCATA	TATGGACGTTTTTGCG	5.56408	AGTAAAAACGTCCATC	GATGGACGTTTTTACT	2.13336	GCATAAAACGTCACTT	AAGTGACGTTTTATGC	1.91834	GCAGAAAACGTCAGTA	TACTGACGTTTTCTGC	3.18536	GTAAAAAACGTCTATA	TATAGACGTTTTTTAC	2.29826	GCGAAAAACGTCTTCA	TGAAGACGTTTTTCGC	0.546243	NA	0.275532	-0.531912	-1.78328	0.335129	-0.441455
AAAACGTG	CACGTTTT	3.58364	ACAAAAAACGTGGTCG	CGACCACGTTTTTTGT	4.84448	CGCAAAAACGTGCATA	TATGCACGTTTTTGCG	4.92321	AGTAAAAACGTGCATC	GATGCACGTTTTTACT	2.56551	GCATAAAACGTGACTT	AAGTCACGTTTTATGC	4.08095	GCAGAAAACGTGAGTA	TACTCACGTTTTCTGC	3.46833	GTAAAAAACGTGTATA	TATACACGTTTTTTAC	NA	GCGAAAAACGTGTTCA	TGAACACGTTTTTCGC	-0.313558	-0.047358	-0.47903	-0.0953386	0.019508	0.598207	NA
AAAACGTT	AACGTTTT	3.77119	ACAAAAAACGTTGTCG	CGACAACGTTTTTTGT	5.37145	CGCAAAAACGTTCATA	TATGAACGTTTTTGCG	5.89427	AGTAAAAACGTTCATC	GATGAACGTTTTTACT	0.0313965	GCATAAAACGTTACTT	AAGTAACGTTTTATGC	1.8154	GCAGAAAACGTTAGTA	TACTAACGTTTTCTGC	2.63735	GTAAAAAACGTTTATA	TATAAACGTTTTTTAC	1.76439	GCGAAAAACGTTTTCA	TGAAAACGTTTTTCGC	-0.0463042	0.654751	0.664284	-2.65539	-1.86909	-0.174366	-0.995597
AAAACTAA	TTAGTTTT	3.17118	ACAAAAAACTAAGTCG	CGACTTAGTTTTTTGT	NA	CGCAAAAACTAACATA	TATGTTAGTTTTTGCG	5.17337	AGTAAAAACTAACATC	GATGTTAGTTTTTACT	2.34528	GCATAAAACTAAACTT	AAGTTTAGTTTTATGC	4.27325	GCAGAAAACTAAAGTA	TACTTTAGTTTTCTGC	NA	GTAAAAAACTAATATA	TATATTAGTTTTTTAC	NA	GCGAAAAACTAATTCA	TGAATTAGTTTTTCGC	-0.901313	NA	-0.184489	-0.317825	0.179815	NA	NA
AAAACTAC	GTAGTTTT	4.38056	ACAAAAAACTACGTCG	CGACGTAGTTTTTTGT	NA	CGCAAAAACTACCATA	TATGGTAGTTTTTGCG	5.06951	AGTAAAAACTACCATC	GATGGTAGTTTTTACT	3.37861	GCATAAAACTACACTT	AAGTGTAGTTTTATGC	3.68714	GCAGAAAACTACAGTA	TACTGTAGTTTTCTGC	NA	GTAAAAAACTACTATA	TATAGTAGTTTTTTAC	NA	GCGAAAAACTACTTCA	TGAAGTAGTTTTTCGC	0.822053	NA	-0.306775	0.726083	-0.30878	NA	NA
AAAACTAG	CTAGTTTT	3.32343	ACAAAAAACTAGGTCG	CGACCTAGTTTTTTGT	NA	CGCAAAAACTAGCATA	TATGCTAGTTTTTGCG	5.19913	AGTAAAAACTAGCATC	GATGCTAGTTTTTACT	0.483855	GCATAAAACTAGACTT	AAGTCTAGTTTTATGC	3.35134	GCAGAAAACTAGAGTA	TACTCTAGTTTTCTGC	NA	GTAAAAAACTAGTATA	TATACTAGTTTTTTAC	2.16338	GCGAAAAACTAGTTCA	TGAACTAGTTTTTCGC	-0.684354	NA	-0.154158	-2.1983	-0.588705	NA	-0.581454
AAAACTAT	ATAGTTTT	4.70536	ACAAAAAACTATGTCG	CGACATAGTTTTTTGT	NA	CGCAAAAACTATCATA	TATGATAGTTTTTGCG	4.09429	AGTAAAAACTATCATC	GATGATAGTTTTTACT	NA	GCATAAAACTATACTT	AAGTATAGTTTTATGC	4.30749	GCAGAAAACTATAGTA	TACTATAGTTTTCTGC	NA	GTAAAAAACTATTATA	TATAATAGTTTTTTAC	NA	GCGAAAAACTATTTCA	TGAAATAGTTTTTCGC	1.28488	NA	-1.45498	NA	0.208355	NA	NA
AAAACTCA	TGAGTTTT	3.98031	ACAAAAAACTCAGTCG	CGACTGAGTTTTTTGT	NA	CGCAAAAACTCACATA	TATGTGAGTTTTTGCG	4.98065	AGTAAAAACTCACATC	GATGTGAGTTTTTACT	NA	GCATAAAACTCAACTT	AAGTTGAGTTTTATGC	4.29615	GCAGAAAACTCAAGTA	TACTTGAGTTTTCTGC	NA	GTAAAAAACTCATATA	TATATGAGTTTTTTAC	NA	GCGAAAAACTCATTCA	TGAATGAGTTTTTCGC	0.25169	NA	-0.411392	NA	0.1989	NA	NA
AAAACTCC	GGAGTTTT	3.64734	ACAAAAAACTCCGTCG	CGACGGAGTTTTTTGT	NA	CGCAAAAACTCCCATA	TATGGGAGTTTTTGCG	2.81461	AGTAAAAACTCCCATC	GATGGGAGTTTTTACT	NA	GCATAAAACTCCACTT	AAGTGGAGTTTTATGC	NA	GCAGAAAACTCCAGTA	TACTGGAGTTTTCTGC	1.77631	GTAAAAAACTCCTATA	TATAGGAGTTTTTTAC	NA	GCGAAAAACTCCTTCA	TGAAGGAGTTTTTCGC	-0.222795	NA	-2.96166	NA	NA	-0.974877	NA
AAAACTCG	CGAGTTTT	4.87726	ACAAAAAACTCGGTCG	CGACCGAGTTTTTTGT	NA	CGCAAAAACTCGCATA	TATGCGAGTTTTTGCG	5.20101	AGTAAAAACTCGCATC	GATGCGAGTTTTTACT	0.782906	GCATAAAACTCGACTT	AAGTCGAGTTTTATGC	3.67178	GCAGAAAACTCGAGTA	TACTCGAGTTTTCTGC	3.44263	GTAAAAAACTCGTATA	TATACGAGTTTTTTAC	NA	GCGAAAAACTCGTTCA	TGAACGAGTTTTTCGC	1.52985	NA	-0.151944	-1.89619	-0.321585	0.574307	NA
AAAACTCT	AGAGTTTT	3.94357	ACAAAAAACTCTGTCG	CGACAGAGTTTTTTGT	NA	CGCAAAAACTCTCATA	TATGAGAGTTTTTGCG	3.88246	AGTAAAAACTCTCATC	GATGAGAGTTTTTACT	NA	GCATAAAACTCTACTT	AAGTAGAGTTTTATGC	2.96421	GCAGAAAACTCTAGTA	TACTAGAGTTTTCTGC	NA	GTAAAAAACTCTTATA	TATAAGAGTTTTTTAC	NA	GCGAAAAACTCTTTCA	TGAAAGAGTTTTTCGC	0.199345	NA	-1.70439	NA	-0.911424	NA	NA
AAAACTGA	TCAGTTTT	4.19539	ACAAAAAACTGAGTCG	CGACTCAGTTTTTTGT	NA	CGCAAAAACTGACATA	TATGTCAGTTTTTGCG	5.59442	AGTAAAAACTGACATC	GATGTCAGTTTTTACT	NA	GCATAAAACTGAACTT	AAGTTCAGTTTTATGC	2.37818	GCAGAAAACTGAAGTA	TACTTCAGTTTTCTGC	4.54105	GTAAAAAACTGATATA	TATATCAGTTTTTTAC	NA	GCGAAAAACTGATTCA	TGAATCAGTTTTTCGC	0.558182	NA	0.311247	NA	-1.39994	1.59552	NA
AAAACTGC	GCAGTTTT	4.27837	ACAAAAAACTGCGTCG	CGACGCAGTTTTTTGT	NA	CGCAAAAACTGCCATA	TATGGCAGTTTTTGCG	5.23139	AGTAAAAACTGCCATC	GATGGCAGTTTTTACT	1.49051	GCATAAAACTGCACTT	AAGTGCAGTTTTATGC	NA	GCAGAAAACTGCAGTA	TACTGCAGTTTTCTGC	NA	GTAAAAAACTGCTATA	TATAGCAGTTTTTTAC	1.79356	GCGAAAAACTGCTTCA	TGAAGCAGTTTTTCGC	0.676433	NA	-0.116181	-1.18134	NA	NA	-0.965323
AAAACTGG	CCAGTTTT	3.60876	ACAAAAAACTGGGTCG	CGACCCAGTTTTTTGT	NA	CGCAAAAACTGGCATA	TATGCCAGTTTTTGCG	5.25462	AGTAAAAACTGGCATC	GATGCCAGTTTTTACT	2.38255	GCATAAAACTGGACTT	AAGTCCAGTTTTATGC	1.54255	GCAGAAAACTGGAGTA	TACTCCAGTTTTCTGC	3.3292	GTAAAAAACTGGTATA	TATACCAGTTTTTTAC	NA	GCGAAAAACTGGTTCA	TGAACCAGTTTTTCGC	-0.277769	NA	-0.0888269	-0.280176	-2.09654	0.468851	NA
AAAACTGT	ACAGTTTT	4.09869	ACAAAAAACTGTGTCG	CGACACAGTTTTTTGT	NA	CGCAAAAACTGTCATA	TATGACAGTTTTTGCG	5.26133	AGTAAAAACTGTCATC	GATGACAGTTTTTACT	3.42059	GCATAAAACTGTACTT	AAGTACAGTTTTATGC	4.14031	GCAGAAAACTGTAGTA	TACTACAGTTTTCTGC	1.84818	GTAAAAAACTGTTATA	TATAACAGTTTTTTAC	3.39607	GCGAAAAACTGTTTCA	TGAAACAGTTTTTCGC	0.42039	NA	-0.0809259	0.768494	0.0689878	-0.908059	0.698049
AAAACTTA	TAAGTTTT	4.13299	ACAAAAAACTTAGTCG	CGACTAAGTTTTTTGT	NA	CGCAAAAACTTACATA	TATGTAAGTTTTTGCG	5.20965	AGTAAAAACTTACATC	GATGTAAGTTTTTACT	NA	GCATAAAACTTAACTT	AAGTTAAGTTTTATGC	2.94866	GCAGAAAACTTAAGTA	TACTTAAGTTTTCTGC	3.04484	GTAAAAAACTTATATA	TATATAAGTTTTTTAC	NA	GCGAAAAACTTATTCA	TGAATAAGTTTTTCGC	0.469263	NA	-0.141776	NA	-0.924382	0.204482	NA
AAAACTTC	GAAGTTTT	3.33357	ACAAAAAACTTCGTCG	CGACGAAGTTTTTTGT	NA	CGCAAAAACTTCCATA	TATGGAAGTTTTTGCG	4.39497	AGTAAAAACTTCCATC	GATGGAAGTTTTTACT	1.56281	GCATAAAACTTCACTT	AAGTGAAGTTTTATGC	2.47623	GCAGAAAACTTCAGTA	TACTGAAGTTTTCTGC	3.38205	GTAAAAAACTTCTATA	TATAGAAGTTTTTTAC	NA	GCGAAAAACTTCTTCA	TGAAGAAGTTTTTCGC	-0.669908	NA	-1.10096	-1.1083	-1.31821	0.517989	NA
AAAACTTG	CAAGTTTT	3.09627	ACAAAAAACTTGGTCG	CGACCAAGTTTTTTGT	5.35601	CGCAAAAACTTGCATA	TATGCAAGTTTTTGCG	5.10266	AGTAAAAACTTGCATC	GATGCAAGTTTTTACT	NA	GCATAAAACTTGACTT	AAGTCAAGTTTTATGC	5.02269	GCAGAAAACTTGAGTA	TACTCAAGTTTTCTGC	3.64272	GTAAAAAACTTGTATA	TATACAAGTTTTTTAC	1.03271	GCGAAAAACTTGTTCA	TGAACAAGTTTTTCGC	-1.00806	0.634176	-0.267737	NA	0.804552	0.760336	-1.75507
AAAACTTT	AAAGTTTT	4.00203	ACAAAAAACTTTGTCG	CGACAAAGTTTTTTGT	NA	CGCAAAAACTTTCATA	TATGAAAGTTTTTGCG	4.66687	AGTAAAAACTTTCATC	GATGAAAGTTTTTACT	0.951183	GCATAAAACTTTACTT	AAGTAAAGTTTTATGC	3.1341	GCAGAAAACTTTAGTA	TACTAAAGTTTTCTGC	NA	GTAAAAAACTTTTATA	TATAAAAGTTTTTTAC	NA	GCGAAAAACTTTTTCA	TGAAAAAGTTTTTCGC	0.282651	NA	-0.780833	-1.72619	-0.769801	NA	NA
AAAAGAAA	TTTCTTTT	4.10837	ACAAAAAAGAAAGTCG	CGACTTTCTTTTTTGT	NA	CGCAAAAAGAAACATA	TATGTTTCTTTTTGCG	6.33839	AGTAAAAAGAAACATC	GATGTTTCTTTTTACT	2.72367	GCATAAAAGAAAACTT	AAGTTTTCTTTTATGC	NA	GCAGAAAAGAAAAGTA	TACTTTTCTTTTCTGC	NA	GTAAAAAAGAAATATA	TATATTTCTTTTTTAC	NA	GCGAAAAAGAAATTCA	TGAATTTCTTTTTCGC	0.434185	NA	1.18719	0.064433	NA	NA	NA
AAAAGAAC	GTTCTTTT	3.93293	ACAAAAAAGAACGTCG	CGACGTTCTTTTTTGT	NA	CGCAAAAAGAACCATA	TATGGTTCTTTTTGCG	NA	AGTAAAAAGAACCATC	GATGGTTCTTTTTACT	NA	GCATAAAAGAACACTT	AAGTGTTCTTTTATGC	3.89033	GCAGAAAAGAACAGTA	TACTGTTCTTTTCTGC	3.71888	GTAAAAAAGAACTATA	TATAGTTCTTTTTTAC	1.87742	GCGAAAAAGAACTTCA	TGAAGTTCTTTTTCGC	0.184178	NA	NA	NA	-0.139398	0.831138	-0.878282
AAAAGAAG	CTTCTTTT	4.30279	ACAAAAAAGAAGGTCG	CGACCTTCTTTTTTGT	NA	CGCAAAAAGAAGCATA	TATGCTTCTTTTTGCG	5.32376	AGTAAAAAGAAGCATC	GATGCTTCTTTTTACT	2.96995	GCATAAAAGAAGACTT	AAGTCTTCTTTTATGC	3.73559	GCAGAAAAGAAGAGTA	TACTCTTCTTTTCTGC	NA	GTAAAAAAGAAGTATA	TATACTTCTTTTTTAC	NA	GCGAAAAAGAAGTTCA	TGAACTTCTTTTTCGC	0.711223	NA	-0.00741982	0.313236	-0.26839	NA	NA
AAAAGAAT	ATTCTTTT	4.44869	ACAAAAAAGAATGTCG	CGACATTCTTTTTTGT	NA	CGCAAAAAGAATCATA	TATGATTCTTTTTGCG	5.00799	AGTAAAAAGAATCATC	GATGATTCTTTTTACT	2.89643	GCATAAAAGAATACTT	AAGTATTCTTTTATGC	3.95979	GCAGAAAAGAATAGTA	TACTATTCTTTTCTGC	3.55749	GTAAAAAAGAATTATA	TATAATTCTTTTTTAC	NA	GCGAAAAAGAATTTCA	TGAAATTCTTTTTCGC	0.919131	NA	-0.379203	0.238966	-0.0814937	0.681092	NA
AAAAGACA	TGTCTTTT	3.68298	ACAAAAAAGACAGTCG	CGACTGTCTTTTTTGT	NA	CGCAAAAAGACACATA	TATGTGTCTTTTTGCG	5.51261	AGTAAAAAGACACATC	GATGTGTCTTTTTACT	NA	GCATAAAAGACAACTT	AAGTTGTCTTTTATGC	NA	GCAGAAAAGACAAGTA	TACTTGTCTTTTCTGC	NA	GTAAAAAAGACATATA	TATATGTCTTTTTTAC	2.7736	GCGAAAAAGACATTCA	TGAATGTCTTTTTCGC	-0.171998	NA	0.21493	NA	NA	NA	0.0519325
AAAAGACC	GGTCTTTT	4.63394	ACAAAAAAGACCGTCG	CGACGGTCTTTTTTGT	NA	CGCAAAAAGACCCATA	TATGGGTCTTTTTGCG	5.31315	AGTAAAAAGACCCATC	GATGGGTCTTTTTACT	2.01017	GCATAAAAGACCACTT	AAGTGGTCTTTTATGC	4.01921	GCAGAAAAGACCAGTA	TACTGGTCTTTTCTGC	NA	GTAAAAAAGACCTATA	TATAGGTCTTTTTTAC	NA	GCGAAAAAGACCTTCA	TGAAGGTCTTTTTCGC	1.18311	NA	-0.0199136	-0.656361	-0.0319605	NA	NA
AAAAGACG	CGTCTTTT	3.73667	ACAAAAAAGACGGTCG	CGACCGTCTTTTTTGT	NA	CGCAAAAAGACGCATA	TATGCGTCTTTTTGCG	5.42476	AGTAAAAAGACGCATC	GATGCGTCTTTTTACT	2.395	GCATAAAAGACGACTT	AAGTCGTCTTTTATGC	5.13634	GCAGAAAAGACGAGTA	TACTCGTCTTTTCTGC	4.00553	GTAAAAAAGACGTATA	TATACGTCTTTTTTAC	NA	GCGAAAAAGACGTTCA	TGAACGTCTTTTTCGC	-0.0954947	NA	0.111495	-0.2676	0.899294	1.09764	NA
AAAAGACT	AGTCTTTT	3.35536	ACAAAAAAGACTGTCG	CGACAGTCTTTTTTGT	5.29265	CGCAAAAAGACTCATA	TATGAGTCTTTTTGCG	5.48726	AGTAAAAAGACTCATC	GATGAGTCTTTTTACT	1.9143	GCATAAAAGACTACTT	AAGTAGTCTTTTATGC	NA	GCAGAAAAGACTAGTA	TACTAGTCTTTTCTGC	2.66447	GTAAAAAAGACTTATA	TATAAGTCTTTTTTAC	0.818933	GCGAAAAAGACTTTCA	TGAAAGTCTTTTTCGC	-0.638861	0.549766	0.185076	-0.753218	NA	-0.149149	-1.97696
AAAAGAGA	TCTCTTTT	4.13433	ACAAAAAAGAGAGTCG	CGACTCTCTTTTTTGT	NA	CGCAAAAAGAGACATA	TATGTCTCTTTTTGCG	6.06068	AGTAAAAAGAGACATC	GATGTCTCTTTTTACT	2.44927	GCATAAAAGAGAACTT	AAGTTCTCTTTTATGC	3.65642	GCAGAAAAGAGAAGTA	TACTTCTCTTTTCTGC	4.36044	GTAAAAAAGAGATATA	TATATCTCTTTTTTAC	NA	GCGAAAAAGAGATTCA	TGAATCTCTTTTTCGC	0.471177	NA	0.860214	-0.212774	-0.33439	1.42761	NA
AAAAGAGC	GCTCTTTT	3.96714	ACAAAAAAGAGCGTCG	CGACGCTCTTTTTTGT	NA	CGCAAAAAGAGCCATA	TATGGCTCTTTTTGCG	4.97043	AGTAAAAAGAGCCATC	GATGGCTCTTTTTACT	3.33638	GCATAAAAGAGCACTT	AAGTGCTCTTTTATGC	NA	GCAGAAAAGAGCAGTA	TACTGCTCTTTTCTGC	3.25454	GTAAAAAAGAGCTATA	TATAGCTCTTTTTTAC	3.68741	GCGAAAAAGAGCTTCA	TGAAGCTCTTTTTCGC	0.232933	NA	-0.423422	0.683417	NA	0.399439	1.00045
AAAAGAGG	CCTCTTTT	3.59892	ACAAAAAAGAGGGTCG	CGACCCTCTTTTTTGT	NA	CGCAAAAAGAGGCATA	TATGCCTCTTTTTGCG	5.51355	AGTAAAAAGAGGCATC	GATGCCTCTTTTTACT	0.919849	GCATAAAAGAGGACTT	AAGTCCTCTTTTATGC	4.12269	GCAGAAAAGAGGAGTA	TACTCCTCTTTTCTGC	2.31552	GTAAAAAAGAGGTATA	TATACCTCTTTTTTAC	3.13294	GCGAAAAAGAGGTTCA	TGAACCTCTTTTTCGC	-0.291789	NA	0.216029	-1.75784	0.0543036	-0.473577	0.424921
AAAAGAGT	ACTCTTTT	3.84875	ACAAAAAAGAGTGTCG	CGACACTCTTTTTTGT	NA	CGCAAAAAGAGTCATA	TATGACTCTTTTTGCG	5.72542	AGTAAAAAGAGTCATC	GATGACTCTTTTTACT	2.14932	GCATAAAAGAGTACTT	AAGTACTCTTTTATGC	3.87765	GCAGAAAAGAGTAGTA	TACTACTCTTTTCTGC	2.54407	GTAAAAAAGAGTTATA	TATAACTCTTTTTTAC	0.0343964	GCGAAAAAGAGTTTCA	TGAAACTCTTTTTCGC	0.064225	NA	0.465488	-0.515787	-0.149963	-0.261087	-2.7913
AAAAGATA	TATCTTTT	4.93947	ACAAAAAAGATAGTCG	CGACTATCTTTTTTGT	NA	CGCAAAAAGATACATA	TATGTATCTTTTTGCG	5.74822	AGTAAAAAGATACATC	GATGTATCTTTTTACT	5.64407	GCATAAAAGATAACTT	AAGTTATCTTTTATGC	6.77473	GCAGAAAAGATAAGTA	TACTTATCTTTTCTGC	3.99583	GTAAAAAAGATATATA	TATATATCTTTTTTAC	NA	GCGAAAAAGATATTCA	TGAATATCTTTTTCGC	1.6185	NA	0.492331	3.01473	2.26508	1.08863	NA
AAAAGATC	GATCTTTT	4.60286	ACAAAAAAGATCGTCG	CGACGATCTTTTTTGT	NA	CGCAAAAAGATCCATA	TATGGATCTTTTTGCG	5.65164	AGTAAAAAGATCCATC	GATGGATCTTTTTACT	2.59719	GCATAAAAGATCACTT	AAGTGATCTTTTATGC	NA	GCAGAAAAGATCAGTA	TACTGATCTTTTCTGC	2.64701	GTAAAAAAGATCTATA	TATAGATCTTTTTTAC	2.45079	GCGAAAAAGATCTTCA	TGAAGATCTTTTTCGC	1.13882	NA	0.378615	-0.0633415	NA	-0.165383	-0.283136
AAAAGATG	CATCTTTT	3.53458	ACAAAAAAGATGGTCG	CGACCATCTTTTTTGT	NA	CGCAAAAAGATGCATA	TATGCATCTTTTTGCG	4.61051	AGTAAAAAGATGCATC	GATGCATCTTTTTACT	2.7344	GCATAAAAGATGACTT	AAGTCATCTTTTATGC	5.55722	GCAGAAAAGATGAGTA	TACTCATCTTTTCTGC	3.18842	GTAAAAAAGATGTATA	TATACATCTTTTTTAC	2.52035	GCGAAAAAGATGTTCA	TGAACATCTTTTTCGC	-0.383468	NA	-0.847195	0.0752799	1.25015	0.337973	-0.210931
AAAAGATT	AATCTTTT	4.95273	ACAAAAAAGATTGTCG	CGACAATCTTTTTTGT	NA	CGCAAAAAGATTCATA	TATGAATCTTTTTGCG	6.12549	AGTAAAAAGATTCATC	GATGAATCTTTTTACT	4.44544	GCATAAAAGATTACTT	AAGTAATCTTTTATGC	5.3969	GCAGAAAAGATTAGTA	TACTAATCTTTTCTGC	NA	GTAAAAAAGATTTATA	TATAAATCTTTTTTAC	1.57366	GCGAAAAAGATTTTCA	TGAAAATCTTTTTCGC	1.63739	NA	0.936517	1.80382	1.11651	NA	-1.19357
AAAAGCAA	TTGCTTTT	3.74815	ACAAAAAAGCAAGTCG	CGACTTGCTTTTTTGT	NA	CGCAAAAAGCAACATA	TATGTTGCTTTTTGCG	4.83751	AGTAAAAAGCAACATC	GATGTTGCTTTTTACT	1.46462	GCATAAAAGCAAACTT	AAGTTTGCTTTTATGC	NA	GCAGAAAAGCAAAGTA	TACTTTGCTTTTCTGC	NA	GTAAAAAAGCAATATA	TATATTGCTTTTTTAC	NA	GCGAAAAAGCAATTCA	TGAATTGCTTTTTCGC	-0.079138	NA	-0.579931	-1.20749	NA	NA	NA
AAAAGCAC	GTGCTTTT	5.01619	ACAAAAAAGCACGTCG	CGACGTGCTTTTTTGT	NA	CGCAAAAAGCACCATA	TATGGTGCTTTTTGCG	5.88627	AGTAAAAAGCACCATC	GATGGTGCTTTTTACT	2.21602	GCATAAAAGCACACTT	AAGTGTGCTTTTATGC	NA	GCAGAAAAGCACAGTA	TACTGTGCTTTTCTGC	NA	GTAAAAAAGCACTATA	TATAGTGCTTTTTTAC	NA	GCGAAAAAGCACTTCA	TGAAGTGCTTTTTCGC	1.72782	NA	0.654865	-0.448409	NA	NA	NA
AAAAGCAG	CTGCTTTT	3.98282	ACAAAAAAGCAGGTCG	CGACCTGCTTTTTTGT	NA	CGCAAAAAGCAGCATA	TATGCTGCTTTTTGCG	5.99677	AGTAAAAAGCAGCATC	GATGCTGCTTTTTACT	3.37875	GCATAAAAGCAGACTT	AAGTCTGCTTTTATGC	NA	GCAGAAAAGCAGAGTA	TACTCTGCTTTTCTGC	3.40449	GTAAAAAAGCAGTATA	TATACTGCTTTTTTAC	NA	GCGAAAAAGCAGTTCA	TGAACTGCTTTTTCGC	0.255274	NA	0.784964	0.726225	NA	0.538851	NA
AAAAGCAT	ATGCTTTT	3.8034	ACAAAAAAGCATGTCG	CGACATGCTTTTTTGT	NA	CGCAAAAAGCATCATA	TATGATGCTTTTTGCG	4.94442	AGTAAAAAGCATCATC	GATGATGCTTTTTACT	3.4077	GCATAAAAGCATACTT	AAGTATGCTTTTATGC	4.31584	GCAGAAAAGCATAGTA	TACTATGCTTTTCTGC	2.81567	GTAAAAAAGCATTATA	TATAATGCTTTTTTAC	NA	GCGAAAAAGCATTTCA	TGAAATGCTTTTTCGC	-0.000395794	NA	-0.454057	0.755473	0.215312	-0.00858056	NA
AAAAGCCA	TGGCTTTT	3.5491	ACAAAAAAGCCAGTCG	CGACTGGCTTTTTTGT	NA	CGCAAAAAGCCACATA	TATGTGGCTTTTTGCG	NA	AGTAAAAAGCCACATC	GATGTGGCTTTTTACT	NA	GCATAAAAGCCAACTT	AAGTTGGCTTTTATGC	3.88819	GCAGAAAAGCCAAGTA	TACTTGGCTTTTCTGC	3.311	GTAAAAAAGCCATATA	TATATGGCTTTTTTAC	NA	GCGAAAAAGCCATTCA	TGAATGGCTTTTTCGC	-0.362778	NA	NA	NA	-0.141183	0.451929	NA
AAAAGCCC	GGGCTTTT	4.0895	ACAAAAAAGCCCGTCG	CGACGGGCTTTTTTGT	NA	CGCAAAAAGCCCCATA	TATGGGGCTTTTTGCG	5.51235	AGTAAAAAGCCCCATC	GATGGGGCTTTTTACT	NA	GCATAAAAGCCCACTT	AAGTGGGCTTTTATGC	3.52608	GCAGAAAAGCCCAGTA	TACTGGGCTTTTCTGC	3.1051	GTAAAAAAGCCCTATA	TATAGGGCTTTTTTAC	NA	GCGAAAAAGCCCTTCA	TGAAGGGCTTTTTCGC	0.407283	NA	0.214626	NA	-0.443042	0.26051	NA
AAAAGCCG	CGGCTTTT	3.74325	ACAAAAAAGCCGGTCG	CGACCGGCTTTTTTGT	NA	CGCAAAAAGCCGCATA	TATGCGGCTTTTTGCG	4.7967	AGTAAAAAGCCGCATC	GATGCGGCTTTTTACT	1.4073	GCATAAAAGCCGACTT	AAGTCGGCTTTTATGC	3.61375	GCAGAAAAGCCGAGTA	TACTCGGCTTTTCTGC	3.81244	GTAAAAAAGCCGTATA	TATACGGCTTTTTTAC	NA	GCGAAAAAGCCGTTCA	TGAACGGCTTTTTCGC	-0.0861155	NA	-0.62797	-1.26541	-0.369957	0.918128	NA
AAAAGCCT	AGGCTTTT	2.98353	ACAAAAAAGCCTGTCG	CGACAGGCTTTTTTGT	NA	CGCAAAAAGCCTCATA	TATGAGGCTTTTTGCG	5.50147	AGTAAAAAGCCTCATC	GATGAGGCTTTTTACT	NA	GCATAAAAGCCTACTT	AAGTAGGCTTTTATGC	3.2987	GCAGAAAAGCCTAGTA	TACTAGGCTTTTCTGC	4.38443	GTAAAAAAGCCTTATA	TATAAGGCTTTTTTAC	NA	GCGAAAAAGCCTTTCA	TGAAAGGCTTTTTCGC	-1.16872	NA	0.201809	NA	-0.632588	1.44991	NA
AAAAGCGA	TCGCTTTT	4.51744	ACAAAAAAGCGAGTCG	CGACTCGCTTTTTTGT	NA	CGCAAAAAGCGACATA	TATGTCGCTTTTTGCG	5.27999	AGTAAAAAGCGACATC	GATGTCGCTTTTTACT	1.91217	GCATAAAAGCGAACTT	AAGTTCGCTTTTATGC	3.12582	GCAGAAAAGCGAAGTA	TACTTCGCTTTTCTGC	4.35041	GTAAAAAAGCGATATA	TATATCGCTTTTTTAC	NA	GCGAAAAAGCGATTCA	TGAATCGCTTTTTCGC	1.0171	NA	-0.0589608	-0.755363	-0.776704	1.41828	NA
AAAAGCGC	GCGCTTTT	4.64028	ACAAAAAAGCGCGTCG	CGACGCGCTTTTTTGT	5.25804	CGCAAAAAGCGCCATA	TATGGCGCTTTTTGCG	3.91734	AGTAAAAAGCGCCATC	GATGGCGCTTTTTACT	1.7736	GCATAAAAGCGCACTT	AAGTGCGCTTTTATGC	NA	GCAGAAAAGCGCAGTA	TACTGCGCTTTTCTGC	3.59812	GTAAAAAAGCGCTATA	TATAGCGCTTTTTTAC	NA	GCGAAAAAGCGCTTCA	TGAAGCGCTTTTTCGC	1.19216	0.503644	-1.66333	-0.895353	NA	0.71887	NA
AAAAGCGG	CCGCTTTT	4.56634	ACAAAAAAGCGGGTCG	CGACCCGCTTTTTTGT	5.79691	CGCAAAAAGCGGCATA	TATGCCGCTTTTTGCG	5.3277	AGTAAAAAGCGGCATC	GATGCCGCTTTTTACT	2.73725	GCATAAAAGCGGACTT	AAGTCCGCTTTTATGC	3.81669	GCAGAAAAGCGGAGTA	TACTCCGCTTTTCTGC	1.80253	GTAAAAAAGCGGTATA	TATACCGCTTTTTTAC	2.25178	GCGAAAAAGCGGTTCA	TGAACCGCTTTTTCGC	1.08679	1.22162	-0.00278804	0.0781618	-0.200786	-0.950504	-0.489698
AAAAGCGT	ACGCTTTT	3.88662	ACAAAAAAGCGTGTCG	CGACACGCTTTTTTGT	6.08652	CGCAAAAAGCGTCATA	TATGACGCTTTTTGCG	5.91794	AGTAAAAAGCGTCATC	GATGACGCTTTTTACT	2.43994	GCATAAAAGCGTACTT	AAGTACGCTTTTATGC	3.98465	GCAGAAAAGCGTAGTA	TACTACGCTTTTCTGC	2.70216	GTAAAAAAGCGTTATA	TATAACGCTTTTTTAC	2.35733	GCGAAAAAGCGTTTCA	TGAAACGCTTTTTCGC	0.118181	1.60747	0.692161	-0.222192	-0.0607676	-0.114107	-0.380137
AAAAGCTA	TAGCTTTT	3.31934	ACAAAAAAGCTAGTCG	CGACTAGCTTTTTTGT	NA	CGCAAAAAGCTACATA	TATGTAGCTTTTTGCG	5.11556	AGTAAAAAGCTACATC	GATGTAGCTTTTTACT	NA	GCATAAAAGCTAACTT	AAGTTAGCTTTTATGC	3.82877	GCAGAAAAGCTAAGTA	TACTTAGCTTTTCTGC	3.70134	GTAAAAAAGCTATATA	TATATAGCTTTTTTAC	2.11787	GCGAAAAAGCTATTCA	TGAATAGCTTTTTCGC	-0.69019	NA	-0.252556	NA	-0.190715	0.814833	-0.628692
AAAAGCTC	GAGCTTTT	3.59443	ACAAAAAAGCTCGTCG	CGACGAGCTTTTTTGT	NA	CGCAAAAAGCTCCATA	TATGGAGCTTTTTGCG	4.52414	AGTAAAAAGCTCCATC	GATGGAGCTTTTTACT	2.60111	GCATAAAAGCTCACTT	AAGTGAGCTTTTATGC	4.49585	GCAGAAAAGCTCAGTA	TACTGAGCTTTTCTGC	3.61094	GTAAAAAAGCTCTATA	TATAGAGCTTTTTTAC	NA	GCGAAAAAGCTCTTCA	TGAAGAGCTTTTTCGC	-0.298191	NA	-0.948883	-0.0593742	0.365378	0.730786	NA
AAAAGCTG	CAGCTTTT	3.54286	ACAAAAAAGCTGGTCG	CGACCAGCTTTTTTGT	4.23721	CGCAAAAAGCTGCATA	TATGCAGCTTTTTGCG	5.06028	AGTAAAAAGCTGCATC	GATGCAGCTTTTTACT	3.12355	GCATAAAAGCTGACTT	AAGTCAGCTTTTATGC	3.9339	GCAGAAAAGCTGAGTA	TACTCAGCTTTTCTGC	4.30643	GTAAAAAAGCTGTATA	TATACAGCTTTTTTAC	1.29776	GCGAAAAAGCTGTTCA	TGAACAGCTTTTTCGC	-0.371665	-0.856462	-0.317641	0.468406	-0.103077	1.3774	-1.47995
AAAAGCTT	AAGCTTTT	4.2197	ACAAAAAAGCTTGTCG	CGACAAGCTTTTTTGT	NA	CGCAAAAAGCTTCATA	TATGAAGCTTTTTGCG	4.89514	AGTAAAAAGCTTCATC	GATGAAGCTTTTTACT	NA	GCATAAAAGCTTACTT	AAGTAAGCTTTTATGC	4.91462	GCAGAAAAGCTTAGTA	TACTAAGCTTTTCTGC	2.84006	GTAAAAAAGCTTTATA	TATAAAGCTTTTTTAC	1.83112	GCGAAAAAGCTTTTCA	TGAAAAGCTTTTTCGC	0.592825	NA	-0.512068	NA	0.714464	0.0141006	-0.926335
AAAAGGAA	TTCCTTTT	3.99963	ACAAAAAAGGAAGTCG	CGACTTCCTTTTTTGT	NA	CGCAAAAAGGAACATA	TATGTTCCTTTTTGCG	3.83415	AGTAAAAAGGAACATC	GATGTTCCTTTTTACT	0.866526	GCATAAAAGGAAACTT	AAGTTTCCTTTTATGC	NA	GCAGAAAAGGAAAGTA	TACTTTCCTTTTCTGC	3.82442	GTAAAAAAGGAATATA	TATATTCCTTTTTTAC	NA	GCGAAAAAGGAATTCA	TGAATTCCTTTTTCGC	0.279227	NA	-1.76126	-1.81171	NA	0.929264	NA
AAAAGGAC	GTCCTTTT	0.959931	ACAAAAAAGGACGTCG	CGACGTCCTTTTTTGT	NA	CGCAAAAAGGACCATA	TATGGTCCTTTTTGCG	3.55401	AGTAAAAAGGACCATC	GATGGTCCTTTTTACT	NA	GCATAAAAGGACACTT	AAGTGTCCTTTTATGC	NA	GCAGAAAAGGACAGTA	TACTGTCCTTTTCTGC	2.61687	GTAAAAAAGGACTATA	TATAGTCCTTTTTTAC	NA	GCGAAAAAGGACTTCA	TGAAGTCCTTTTTCGC	-4.05234	NA	-2.09109	NA	NA	-0.193405	NA
AAAAGGAG	CTCCTTTT	2.97053	ACAAAAAAGGAGGTCG	CGACCTCCTTTTTTGT	2.11087	CGCAAAAAGGAGCATA	TATGCTCCTTTTTGCG	3.75845	AGTAAAAAGGAGCATC	GATGCTCCTTTTTACT	NA	GCATAAAAGGAGACTT	AAGTCTCCTTTTATGC	3.95386	GCAGAAAAGGAGAGTA	TACTCTCCTTTTCTGC	1.07757	GTAAAAAAGGAGTATA	TATACTCCTTTTTTAC	1.37805	GCGAAAAAGGAGTTCA	TGAACTCCTTTTTCGC	-1.18724	-3.68949	-1.8504	NA	-0.0864342	-1.62451	-1.39662
AAAAGGAT	ATCCTTTT	2.02838	ACAAAAAAGGATGTCG	CGACATCCTTTTTTGT	4.10318	CGCAAAAAGGATCATA	TATGATCCTTTTTGCG	5.36506	AGTAAAAAGGATCATC	GATGATCCTTTTTACT	NA	GCATAAAAGGATACTT	AAGTATCCTTTTATGC	1.19077	GCAGAAAAGGATAGTA	TACTATCCTTTTCTGC	NA	GTAAAAAAGGATTATA	TATAATCCTTTTTTAC	0.552101	GCGAAAAAGGATTTCA	TGAAATCCTTTTTCGC	-2.52981	-1.03503	0.0412046	NA	-2.38979	NA	-2.25393
AAAAGGCA	TGCCTTTT	3.45556	ACAAAAAAGGCAGTCG	CGACTGCCTTTTTTGT	NA	CGCAAAAAGGCACATA	TATGTGCCTTTTTGCG	5.18976	AGTAAAAAGGCACATC	GATGTGCCTTTTTACT	1.36972	GCATAAAAGGCAACTT	AAGTTGCCTTTTATGC	NA	GCAGAAAAGGCAAGTA	TACTTGCCTTTTCTGC	4.00447	GTAAAAAAGGCATATA	TATATGCCTTTTTTAC	3.46202	GCGAAAAAGGCATTCA	TGAATGCCTTTTTCGC	-0.496069	NA	-0.165197	-1.30337	NA	1.09666	0.766501
AAAAGGCC	GGCCTTTT	4.06093	ACAAAAAAGGCCGTCG	CGACGGCCTTTTTTGT	NA	CGCAAAAAGGCCCATA	TATGGGCCTTTTTGCG	5.61813	AGTAAAAAGGCCCATC	GATGGGCCTTTTTACT	NA	GCATAAAAGGCCACTT	AAGTGGCCTTTTATGC	2.89212	GCAGAAAAGGCCAGTA	TACTGGCCTTTTCTGC	NA	GTAAAAAAGGCCTATA	TATAGGCCTTTTTTAC	2.82634	GCGAAAAAGGCCTTCA	TGAAGGCCTTTTTCGC	0.366573	NA	0.339159	NA	-0.971521	NA	0.106682
AAAAGGCG	CGCCTTTT	3.80892	ACAAAAAAGGCGGTCG	CGACCGCCTTTTTTGT	4.24688	CGCAAAAAGGCGCATA	TATGCGCCTTTTTGCG	4.98013	AGTAAAAAGGCGCATC	GATGCGCCTTTTTACT	3.27698	GCATAAAAGGCGACTT	AAGTCGCCTTTTATGC	4.47616	GCAGAAAAGGCGAGTA	TACTCGCCTTTTCTGC	3.7352	GTAAAAAAGGCGTATA	TATACGCCTTTTTTAC	NA	GCGAAAAAGGCGTTCA	TGAACGCCTTTTTCGC	0.00745639	-0.843572	-0.412012	0.62341	0.348962	0.846317	NA
AAAAGGCT	AGCCTTTT	3.13402	ACAAAAAAGGCTGTCG	CGACAGCCTTTTTTGT	NA	CGCAAAAAGGCTCATA	TATGAGCCTTTTTGCG	5.23231	AGTAAAAAGGCTCATC	GATGAGCCTTTTTACT	0.0570343	GCATAAAAGGCTACTT	AAGTAGCCTTTTATGC	3.45028	GCAGAAAAGGCTAGTA	TACTAGCCTTTTCTGC	2.88496	GTAAAAAAGGCTTATA	TATAAGCCTTTTTTAC	2.11245	GCGAAAAAGGCTTTCA	TGAAAGCCTTTTTCGC	-0.954263	NA	-0.11509	-2.62949	-0.506232	0.0558443	-0.634325
AAAAGGGA	TCCCTTTT	2.64031	ACAAAAAAGGGAGTCG	CGACTCCCTTTTTTGT	NA	CGCAAAAAGGGACATA	TATGTCCCTTTTTGCG	3.90874	AGTAAAAAGGGACATC	GATGTCCCTTTTTACT	2.63159	GCATAAAAGGGAACTT	AAGTTCCCTTTTATGC	6.56721	GCAGAAAAGGGAAGTA	TACTTCCCTTTTCTGC	1.31508	GTAAAAAAGGGATATA	TATATCCCTTTTTTAC	2.52567	GCGAAAAAGGGATTCA	TGAATCCCTTTTTCGC	-1.6578	NA	-1.67345	-0.0285888	2.09209	-1.40369	-0.205412
AAAAGGGC	GCCCTTTT	3.33288	ACAAAAAAGGGCGTCG	CGACGCCCTTTTTTGT	3.93839	CGCAAAAAGGGCCATA	TATGGCCCTTTTTGCG	4.44767	AGTAAAAAGGGCCATC	GATGGCCCTTTTTACT	1.54495	GCATAAAAGGGCACTT	AAGTGCCCTTTTATGC	3.23835	GCAGAAAAGGGCAGTA	TACTGCCCTTTTCTGC	3.10262	GTAAAAAAGGGCTATA	TATAGCCCTTTTTTAC	1.65393	GCGAAAAAGGGCTTCA	TGAAGCCCTTTTTCGC	-0.670897	-1.25459	-1.03892	-1.12634	-0.682892	0.258202	-1.11026
AAAAGGGG	CCCCTTTT	3.87746	ACAAAAAAGGGGGTCG	CGACCCCCTTTTTTGT	4.5018	CGCAAAAAGGGGCATA	TATGCCCCTTTTTGCG	5.04581	AGTAAAAAGGGGCATC	GATGCCCCTTTTTACT	2.77831	GCATAAAAGGGGACTT	AAGTCCCCTTTTATGC	4.1901	GCAGAAAAGGGGAGTA	TACTCCCCTTTTCTGC	2.26281	GTAAAAAAGGGGTATA	TATACCCCTTTTTTAC	1.63312	GCGAAAAAGGGGTTCA	TGAACCCCTTTTTCGC	0.105126	-0.503925	-0.334678	0.119636	0.110493	-0.522575	-1.13185
AAAAGGGT	ACCCTTTT	2.19265	ACAAAAAAGGGTGTCG	CGACACCCTTTTTTGT	4.3455	CGCAAAAAGGGTCATA	TATGACCCTTTTTGCG	4.60222	AGTAAAAAGGGTCATC	GATGACCCTTTTTACT	1.55179	GCATAAAAGGGTACTT	AAGTACCCTTTTATGC	3.44096	GCAGAAAAGGGTAGTA	TACTACCCTTTTCTGC	1.42534	GTAAAAAAGGGTTATA	TATAACCCTTTTTTAC	1.59621	GCGAAAAAGGGTTTCA	TGAAACCCTTTTTCGC	-2.29571	-0.712175	-0.856956	-1.11944	-0.513998	-1.30118	-1.17017
AAAAGGTA	TACCTTTT	2.68953	ACAAAAAAGGTAGTCG	CGACTACCTTTTTTGT	4.44475	CGCAAAAAGGTACATA	TATGTACCTTTTTGCG	2.91459	AGTAAAAAGGTACATC	GATGTACCTTTTTACT	-0.0588125	GCATAAAAGGTAACTT	AAGTTACCTTTTATGC	-0.0161386	GCAGAAAAGGTAAGTA	TACTTACCTTTTCTGC	1.88819	GTAAAAAAGGTATATA	TATATACCTTTTTTAC	2.44278	GCGAAAAAGGTATTCA	TGAATACCTTTTTCGC	-1.58767	-0.579935	-2.84394	-2.74652	-3.39588	-0.870861	-0.29145
AAAAGGTC	GACCTTTT	4.47144	ACAAAAAAGGTCGTCG	CGACGACCTTTTTTGT	NA	CGCAAAAAGGTCCATA	TATGGACCTTTTTGCG	5.90992	AGTAAAAAGGTCCATC	GATGGACCTTTTTACT	2.13099	GCATAAAAGGTCACTT	AAGTGACCTTTTATGC	3.1399	GCAGAAAAGGTCAGTA	TACTGACCTTTTCTGC	2.17875	GTAAAAAAGGTCTATA	TATAGACCTTTTTTAC	3.09054	GCGAAAAAGGTCTTCA	TGAAGACCTTTTTCGC	0.951547	NA	0.682711	-0.534304	-0.764963	-0.600727	0.380913
AAAAGGTG	CACCTTTT	3.2407	ACAAAAAAGGTGGTCG	CGACCACCTTTTTTGT	2.82654	CGCAAAAAGGTGCATA	TATGCACCTTTTTGCG	1.91826	AGTAAAAAGGTGCATC	GATGCACCTTTTTACT	NA	GCATAAAAGGTGACTT	AAGTCACCTTTTATGC	0.76841	GCAGAAAAGGTGAGTA	TACTCACCTTTTCTGC	1.38425	GTAAAAAAGGTGTATA	TATACACCTTTTTTAC	NA	GCGAAAAAGGTGTTCA	TGAACACCTTTTTCGC	-0.802253	-2.73597	-4.01701	NA	-2.74187	-1.33938	NA
AAAAGGTT	AACCTTTT	3.29306	ACAAAAAAGGTTGTCG	CGACAACCTTTTTTGT	NA	CGCAAAAAGGTTCATA	TATGAACCTTTTTGCG	4.60846	AGTAAAAAGGTTCATC	GATGAACCTTTTTACT	0.903683	GCATAAAAGGTTACTT	AAGTAACCTTTTATGC	1.53599	GCAGAAAAGGTTAGTA	TACTAACCTTTTCTGC	2.39294	GTAAAAAAGGTTTATA	TATAAACCTTTTTTAC	2.25062	GCGAAAAAGGTTTTCA	TGAAAACCTTTTTCGC	-0.727637	NA	-0.849606	-1.77418	-2.102	-0.401595	-0.490908
AAAAGTAA	TTACTTTT	2.1404	ACAAAAAAGTAAGTCG	CGACTTACTTTTTTGT	NA	CGCAAAAAGTAACATA	TATGTTACTTTTTGCG	5.82053	AGTAAAAAGTAACATC	GATGTTACTTTTTACT	1.49267	GCATAAAAGTAAACTT	AAGTTTACTTTTATGC	3.41406	GCAGAAAAGTAAAGTA	TACTTTACTTTTCTGC	NA	GTAAAAAAGTAATATA	TATATTACTTTTTTAC	1.78761	GCGAAAAAGTAATTCA	TGAATTACTTTTTCGC	-2.37017	NA	0.577468	-1.17916	-0.536419	NA	-0.9715
AAAAGTAC	GTACTTTT	4.0069	ACAAAAAAGTACGTCG	CGACGTACTTTTTTGT	NA	CGCAAAAAGTACCATA	TATGGTACTTTTTGCG	4.80721	AGTAAAAAGTACCATC	GATGGTACTTTTTACT	1.15936	GCATAAAAGTACACTT	AAGTGTACTTTTATGC	NA	GCAGAAAAGTACAGTA	TACTGTACTTTTCTGC	4.01398	GTAAAAAAGTACTATA	TATAGTACTTTTTTAC	2.19977	GCGAAAAAGTACTTCA	TGAAGTACTTTTTCGC	0.289578	NA	-0.615605	-1.51588	NA	1.1055	-0.543686
AAAAGTAG	CTACTTTT	3.35925	ACAAAAAAGTAGGTCG	CGACCTACTTTTTTGT	NA	CGCAAAAAGTAGCATA	TATGCTACTTTTTGCG	5.52367	AGTAAAAAGTAGCATC	GATGCTACTTTTTACT	NA	GCATAAAAGTAGACTT	AAGTCTACTTTTATGC	4.37356	GCAGAAAAGTAGAGTA	TACTCTACTTTTCTGC	3.12878	GTAAAAAAGTAGTATA	TATACTACTTTTTTAC	2.45919	GCGAAAAAGTAGTTCA	TGAACTACTTTTTCGC	-0.633312	NA	0.227945	NA	0.263428	0.282518	-0.274416
AAAAGTAT	ATACTTTT	3.73073	ACAAAAAAGTATGTCG	CGACATACTTTTTTGT	NA	CGCAAAAAGTATCATA	TATGATACTTTTTGCG	5.73744	AGTAAAAAGTATCATC	GATGATACTTTTTACT	0.112527	GCATAAAAGTATACTT	AAGTATACTTTTATGC	5.03426	GCAGAAAAGTATAGTA	TACTATACTTTTCTGC	3.16624	GTAAAAAAGTATTATA	TATAATACTTTTTTAC	2.88327	GCGAAAAAGTATTTCA	TGAAATACTTTTTCGC	-0.103951	NA	0.479634	-2.57343	0.814201	0.317349	0.165776
AAAAGTCA	TGACTTTT	4.08522	ACAAAAAAGTCAGTCG	CGACTGACTTTTTTGT	4.18979	CGCAAAAAGTCACATA	TATGTGACTTTTTGCG	5.3879	AGTAAAAAGTCACATC	GATGTGACTTTTTACT	1.06789	GCATAAAAGTCAACTT	AAGTTGACTTTTATGC	3.70051	GCAGAAAAGTCAAGTA	TACTTGACTTTTCTGC	4.02662	GTAAAAAAGTCATATA	TATATGACTTTTTTAC	3.08894	GCGAAAAAGTCATTCA	TGAATGACTTTTTCGC	0.401184	-0.919633	0.0680984	-1.60829	-0.297635	1.11725	0.379257
AAAAGTCC	GGACTTTT	3.80231	ACAAAAAAGTCCGTCG	CGACGGACTTTTTTGT	NA	CGCAAAAAGTCCCATA	TATGGGACTTTTTGCG	5.49131	AGTAAAAAGTCCCATC	GATGGGACTTTTTACT	2.59119	GCATAAAAGTCCACTT	AAGTGGACTTTTATGC	3.88219	GCAGAAAAGTCCAGTA	TACTGGACTTTTCTGC	NA	GTAAAAAAGTCCTATA	TATAGGACTTTTTTAC	NA	GCGAAAAAGTCCTTCA	TGAAGGACTTTTTCGC	-0.00195777	NA	0.189851	-0.069397	-0.146185	NA	NA
AAAAGTCG	CGACTTTT	4.31073	ACAAAAAAGTCGGTCG	CGACCGACTTTTTTGT	4.49968	CGCAAAAAGTCGCATA	TATGCGACTTTTTGCG	5.58035	AGTAAAAAGTCGCATC	GATGCGACTTTTTACT	2.55355	GCATAAAAGTCGACTT	AAGTCGACTTTTATGC	3.99043	GCAGAAAAGTCGAGTA	TACTCGACTTTTCTGC	3.88617	GTAAAAAAGTCGTATA	TATACGACTTTTTTAC	0.577925	GCGAAAAAGTCGTTCA	TGAACGACTTTTTCGC	0.722535	-0.506757	0.294687	-0.107421	-0.0559473	0.986673	-2.22713
AAAAGTCT	AGACTTTT	4.39813	ACAAAAAAGTCTGTCG	CGACAGACTTTTTTGT	4.54893	CGCAAAAAGTCTCATA	TATGAGACTTTTTGCG	5.62854	AGTAAAAAGTCTCATC	GATGAGACTTTTTACT	2.20223	GCATAAAAGTCTACTT	AAGTAGACTTTTATGC	5.10106	GCAGAAAAGTCTAGTA	TACTAGACTTTTCTGC	3.54453	GTAAAAAAGTCTTATA	TATAAGACTTTTTTAC	2.43044	GCGAAAAAGTCTTTCA	TGAAAGACTTTTTCGC	0.847087	-0.441137	0.351421	-0.462334	0.869884	0.66905	-0.304254
AAAAGTGA	TCACTTTT	4.93288	ACAAAAAAGTGAGTCG	CGACTCACTTTTTTGT	NA	CGCAAAAAGTGACATA	TATGTCACTTTTTGCG	5.71081	AGTAAAAAGTGACATC	GATGTCACTTTTTACT	2.11445	GCATAAAAGTGAACTT	AAGTTCACTTTTATGC	2.36542	GCAGAAAAGTGAAGTA	TACTTCACTTTTCTGC	3.89711	GTAAAAAAGTGATATA	TATATCACTTTTTTAC	3.67705	GCGAAAAAGTGATTCA	TGAATCACTTTTTCGC	1.60911	NA	0.448287	-0.551015	-1.41058	0.996841	0.9897
AAAAGTGC	GCACTTTT	4.22283	ACAAAAAAGTGCGTCG	CGACGCACTTTTTTGT	5.1141	CGCAAAAAGTGCCATA	TATGGCACTTTTTGCG	5.49193	AGTAAAAAGTGCCATC	GATGGCACTTTTTACT	1.57371	GCATAAAAGTGCACTT	AAGTGCACTTTTATGC	NA	GCAGAAAAGTGCAGTA	TACTGCACTTTTCTGC	NA	GTAAAAAAGTGCTATA	TATAGCACTTTTTTAC	2.91396	GCGAAAAAGTGCTTCA	TGAAGCACTTTTTCGC	0.597285	0.311868	0.190582	-1.09729	NA	NA	0.197623
AAAAGTGG	CCACTTTT	3.55516	ACAAAAAAGTGGGTCG	CGACCCACTTTTTTGT	5.40947	CGCAAAAAGTGGCATA	TATGCCACTTTTTGCG	4.99502	AGTAAAAAGTGGCATC	GATGCCACTTTTTACT	1.99516	GCATAAAAGTGGACTT	AAGTCCACTTTTATGC	2.00983	GCAGAAAAGTGGAGTA	TACTCCACTTTTCTGC	2.30285	GTAAAAAAGTGGTATA	TATACCACTTTTTTAC	2.39639	GCGAAAAAGTGGTTCA	TGAACCACTTTTTCGC	-0.354144	0.705408	-0.39448	-0.671527	-1.70701	-0.485349	-0.339601
AAAAGTGT	ACACTTTT	3.70279	ACAAAAAAGTGTGTCG	CGACACACTTTTTTGT	NA	CGCAAAAAGTGTCATA	TATGACACTTTTTGCG	5.31734	AGTAAAAAGTGTCATC	GATGACACTTTTTACT	2.02906	GCATAAAAGTGTACTT	AAGTACACTTTTATGC	4.50819	GCAGAAAAGTGTAGTA	TACTACACTTTTCTGC	2.35107	GTAAAAAAGTGTTATA	TATAACACTTTTTTAC	2.073	GCGAAAAAGTGTTTCA	TGAAACACTTTTTCGC	-0.143777	NA	-0.0149849	-0.637283	0.375659	-0.440524	-0.675266
AAAAGTTA	TAACTTTT	2.94221	ACAAAAAAGTTAGTCG	CGACTAACTTTTTTGT	NA	CGCAAAAAGTTACATA	TATGTAACTTTTTGCG	5.0001	AGTAAAAAGTTACATC	GATGTAACTTTTTACT	NA	GCATAAAAGTTAACTT	AAGTTAACTTTTATGC	3.07388	GCAGAAAAGTTAAGTA	TACTTAACTTTTCTGC	1.68222	GTAAAAAAGTTATATA	TATATAACTTTTTTAC	1.52203	GCGAAAAAGTTATTCA	TGAATAACTTTTTCGC	-1.2276	NA	-0.388497	NA	-0.819997	-1.06236	-1.24716
AAAAGTTC	GAACTTTT	3.80675	ACAAAAAAGTTCGTCG	CGACGAACTTTTTTGT	NA	CGCAAAAAGTTCCATA	TATGGAACTTTTTGCG	4.89106	AGTAAAAAGTTCCATC	GATGGAACTTTTTACT	1.98548	GCATAAAAGTTCACTT	AAGTGAACTTTTATGC	3.98614	GCAGAAAAGTTCAGTA	TACTGAACTTTTCTGC	3.70403	GTAAAAAAGTTCTATA	TATAGAACTTTTTTAC	1.83896	GCGAAAAAGTTCTTCA	TGAAGAACTTTTTCGC	0.00437122	NA	-0.516876	-0.681306	-0.0595281	0.81734	-0.918195
AAAAGTTG	CAACTTTT	2.94014	ACAAAAAAGTTGGTCG	CGACCAACTTTTTTGT	4.25599	CGCAAAAAGTTGCATA	TATGCAACTTTTTGCG	5.27249	AGTAAAAAGTTGCATC	GATGCAACTTTTTACT	1.73272	GCATAAAAGTTGACTT	AAGTCAACTTTTATGC	4.86196	GCAGAAAAGTTGAGTA	TACTCAACTTTTCTGC	2.9306	GTAAAAAAGTTGTATA	TATACAACTTTTTTAC	1.08318	GCGAAAAAGTTGTTCA	TGAACAACTTTTTCGC	-1.23055	-0.831428	-0.0677824	-0.936655	0.670566	0.0982716	-1.70268
AAAAGTTT	AAACTTTT	4.34676	ACAAAAAAGTTTGTCG	CGACAAACTTTTTTGT	NA	CGCAAAAAGTTTCATA	TATGAAACTTTTTGCG	5.636	AGTAAAAAGTTTCATC	GATGAAACTTTTTACT	1.42435	GCATAAAAGTTTACTT	AAGTAAACTTTTATGC	4.14435	GCAGAAAAGTTTAGTA	TACTAAACTTTTCTGC	3.37685	GTAAAAAAGTTTTATA	TATAAAACTTTTTTAC	1.68786	GCGAAAAAGTTTTTCA	TGAAAAACTTTTTCGC	0.773891	NA	0.360201	-1.24818	0.0723575	0.513158	-1.07504
AAAATAAA	TTTATTTT	3.62463	ACAAAAAATAAAGTCG	CGACTTTATTTTTTGT	NA	CGCAAAAATAAACATA	TATGTTTATTTTTGCG	5.47901	AGTAAAAATAAACATC	GATGTTTATTTTTACT	NA	GCATAAAATAAAACTT	AAGTTTTATTTTATGC	3.77574	GCAGAAAATAAAAGTA	TACTTTTATTTTCTGC	NA	GTAAAAAATAAATATA	TATATTTATTTTTTAC	NA	GCGAAAAATAAATTCA	TGAATTTATTTTTCGC	-0.255149	NA	0.175373	NA	-0.234919	NA	NA
AAAATAAC	GTTATTTT	3.49898	ACAAAAAATAACGTCG	CGACGTTATTTTTTGT	NA	CGCAAAAATAACCATA	TATGGTTATTTTTGCG	5.17595	AGTAAAAATAACCATC	GATGGTTATTTTTACT	1.96355	GCATAAAATAACACTT	AAGTGTTATTTTATGC	NA	GCAGAAAATAACAGTA	TACTGTTATTTTCTGC	NA	GTAAAAAATAACTATA	TATAGTTATTTTTTAC	1.56949	GCGAAAAATAACTTCA	TGAAGTTATTTTTCGC	-0.434206	NA	-0.181446	-0.703457	NA	NA	-1.1979
AAAATAAG	CTTATTTT	4.45108	ACAAAAAATAAGGTCG	CGACCTTATTTTTTGT	NA	CGCAAAAATAAGCATA	TATGCTTATTTTTGCG	5.73007	AGTAAAAATAAGCATC	GATGCTTATTTTTACT	NA	GCATAAAATAAGACTT	AAGTCTTATTTTATGC	3.19842	GCAGAAAATAAGAGTA	TACTCTTATTTTCTGC	2.89209	GTAAAAAATAAGTATA	TATACTTATTTTTTAC	2.55667	GCGAAAAATAAGTTCA	TGAACTTATTTTTCGC	0.922546	NA	0.470961	NA	-0.716185	0.0624675	-0.173231
AAAATAAT	ATTATTTT	4.70535	ACAAAAAATAATGTCG	CGACATTATTTTTTGT	NA	CGCAAAAATAATCATA	TATGATTATTTTTGCG	5.05314	AGTAAAAATAATCATC	GATGATTATTTTTACT	2.35071	GCATAAAATAATACTT	AAGTATTATTTTATGC	3.00532	GCAGAAAATAATAGTA	TACTATTATTTTCTGC	3.23808	GTAAAAAATAATTATA	TATAATTATTTTTTAC	2.29645	GCGAAAAATAATTTCA	TGAAATTATTTTTCGC	1.28488	NA	-0.326043	-0.312342	-0.877157	0.38414	-0.443337
AAAATACA	TGTATTTT	3.53533	ACAAAAAATACAGTCG	CGACTGTATTTTTTGT	NA	CGCAAAAATACACATA	TATGTGTATTTTTGCG	NA	AGTAAAAATACACATC	GATGTGTATTTTTACT	NA	GCATAAAATACAACTT	AAGTTGTATTTTATGC	3.36017	GCAGAAAATACAAGTA	TACTTGTATTTTCTGC	3.79253	GTAAAAAATACATATA	TATATGTATTTTTTAC	3.28949	GCGAAAAATACATTCA	TGAATGTATTTTTCGC	-0.382401	NA	NA	NA	-0.581348	0.899617	0.587417
AAAATACC	GGTATTTT	3.81242	ACAAAAAATACCGTCG	CGACGGTATTTTTTGT	NA	CGCAAAAATACCCATA	TATGGGTATTTTTGCG	5.34023	AGTAAAAATACCCATC	GATGGGTATTTTTACT	NA	GCATAAAATACCACTT	AAGTGGTATTTTATGC	2.47681	GCAGAAAATACCAGTA	TACTGGTATTTTCTGC	NA	GTAAAAAATACCTATA	TATAGGTATTTTTTAC	NA	GCGAAAAATACCTTCA	TGAAGGTATTTTTCGC	0.0124485	NA	0.011975	NA	-1.31772	NA	NA
AAAATACG	CGTATTTT	4.48637	ACAAAAAATACGGTCG	CGACCGTATTTTTTGT	NA	CGCAAAAATACGCATA	TATGCGTATTTTTGCG	5.7695	AGTAAAAATACGCATC	GATGCGTATTTTTACT	2.66433	GCATAAAATACGACTT	AAGTCGTATTTTATGC	4.83244	GCAGAAAATACGAGTA	TACTCGTATTTTCTGC	4.37871	GTAAAAAATACGTATA	TATACGTATTTTTTAC	NA	GCGAAAAATACGTTCA	TGAACGTATTTTTCGC	0.972829	NA	0.517385	0.00448833	0.645958	1.44459	NA
AAAATACT	AGTATTTT	4.13237	ACAAAAAATACTGTCG	CGACAGTATTTTTTGT	NA	CGCAAAAATACTCATA	TATGAGTATTTTTGCG	6.27205	AGTAAAAATACTCATC	GATGAGTATTTTTACT	2.4896	GCATAAAATACTACTT	AAGTAGTATTTTATGC	2.41085	GCAGAAAATACTAGTA	TACTAGTATTTTCTGC	NA	GTAAAAAATACTTATA	TATAAGTATTTTTTAC	NA	GCGAAAAATACTTTCA	TGAAAGTATTTTTCGC	0.468384	NA	1.10908	-0.172023	-1.37271	NA	NA
AAAATAGA	TCTATTTT	4.3098	ACAAAAAATAGAGTCG	CGACTCTATTTTTTGT	NA	CGCAAAAATAGACATA	TATGTCTATTTTTGCG	5.43358	AGTAAAAATAGACATC	GATGTCTATTTTTACT	3.65699	GCATAAAATAGAACTT	AAGTTCTATTTTATGC	2.43053	GCAGAAAATAGAAGTA	TACTTCTATTTTCTGC	4.65588	GTAAAAAATAGATATA	TATATCTATTTTTTAC	NA	GCGAAAAATAGATTCA	TGAATCTATTTTTCGC	0.721213	NA	0.121876	1.00731	-1.35631	1.70228	NA
AAAATAGC	GCTATTTT	4.27231	ACAAAAAATAGCGTCG	CGACGCTATTTTTTGT	NA	CGCAAAAATAGCCATA	TATGGCTATTTTTGCG	5.45765	AGTAAAAATAGCCATC	GATGGCTATTTTTACT	2.68876	GCATAAAATAGCACTT	AAGTGCTATTTTATGC	NA	GCAGAAAATAGCAGTA	TACTGCTATTTTCTGC	3.09876	GTAAAAAATAGCTATA	TATAGCTATTTTTTAC	NA	GCGAAAAATAGCTTCA	TGAAGCTATTTTTCGC	0.667795	NA	0.150218	0.029166	NA	0.25461	NA
AAAATAGG	CCTATTTT	3.58505	ACAAAAAATAGGGTCG	CGACCCTATTTTTTGT	5.00365	CGCAAAAATAGGCATA	TATGCCTATTTTTGCG	5.3418	AGTAAAAATAGGCATC	GATGCCTATTTTTACT	1.17269	GCATAAAATAGGACTT	AAGTCCTATTTTATGC	1.88092	GCAGAAAATAGGAGTA	TACTCCTATTTTCTGC	2.14812	GTAAAAAATAGGTATA	TATACCTATTTTTTAC	1.83744	GCGAAAAATAGGTTCA	TGAACCTATTTTTCGC	-0.311557	0.164707	0.013814	-1.50241	-1.81447	-0.629204	-0.919774
AAAATAGT	ACTATTTT	3.95845	ACAAAAAATAGTGTCG	CGACACTATTTTTTGT	NA	CGCAAAAATAGTCATA	TATGACTATTTTTGCG	5.12058	AGTAAAAATAGTCATC	GATGACTATTTTTACT	2.66356	GCATAAAATAGTACTT	AAGTACTATTTTATGC	3.07809	GCAGAAAATAGTAGTA	TACTACTATTTTCTGC	3.30128	GTAAAAAATAGTTATA	TATAACTATTTTTTAC	0.050801	GCGAAAAATAGTTTCA	TGAAACTATTTTTCGC	0.220543	NA	-0.246639	0.00371526	-0.816487	0.442897	-2.77427
AAAATATA	TATATTTT	4.07844	ACAAAAAATATAGTCG	CGACTATATTTTTTGT	NA	CGCAAAAATATACATA	TATGTATATTTTTGCG	6.21806	AGTAAAAATATACATC	GATGTATATTTTTACT	NA	GCATAAAATATAACTT	AAGTTATATTTTATGC	3.61333	GCAGAAAATATAAGTA	TACTTATATTTTCTGC	4.08542	GTAAAAAATATATATA	TATATATATTTTTTAC	3.09085	GCGAAAAATATATTCA	TGAATATATTTTTCGC	0.391525	NA	1.04552	NA	-0.370304	1.17191	0.381233
AAAATATC	GATATTTT	4.86319	ACAAAAAATATCGTCG	CGACGATATTTTTTGT	NA	CGCAAAAATATCCATA	TATGGATATTTTTGCG	5.69629	AGTAAAAATATCCATC	GATGGATATTTTTACT	2.02106	GCATAAAATATCACTT	AAGTGATATTTTATGC	3.98094	GCAGAAAATATCAGTA	TACTGATATTTTCTGC	NA	GTAAAAAATATCTATA	TATAGATATTTTTTAC	1.87742	GCGAAAAATATCTTCA	TGAAGATATTTTTCGC	1.50979	NA	0.43119	-0.645362	-0.0638662	NA	-0.878282
AAAATATG	CATATTTT	3.77762	ACAAAAAATATGGTCG	CGACCATATTTTTTGT	NA	CGCAAAAATATGCATA	TATGCATATTTTTGCG	6.05026	AGTAAAAATATGCATC	GATGCATATTTTTACT	2.57733	GCATAAAATATGACTT	AAGTCATATTTTATGC	4.66676	GCAGAAAATATGAGTA	TACTCATATTTTCTGC	4.21563	GTAAAAAATATGTATA	TATACATATTTTTTAC	3.73745	GCGAAAAATATGTTCA	TGAACATATTTTTCGC	-0.0371364	NA	0.847947	-0.0834024	0.507845	1.29297	1.0524
AAAATATT	AATATTTT	4.40191	ACAAAAAATATTGTCG	CGACAATATTTTTTGT	NA	CGCAAAAATATTCATA	TATGAATATTTTTGCG	6.02967	AGTAAAAATATTCATC	GATGAATATTTTTACT	2.07377	GCATAAAATATTACTT	AAGTAATATTTTATGC	2.09527	GCAGAAAATATTAGTA	TACTAATATTTTCTGC	4.10442	GTAAAAAATATTTATA	TATAAATATTTTTTAC	2.16803	GCGAAAAATATTTTCA	TGAAAATATTTTTCGC	0.852471	NA	0.823706	-0.592117	-1.63578	1.18958	-0.576629
AAAATCAA	TTGATTTT	4.53938	ACAAAAAATCAAGTCG	CGACTTGATTTTTTGT	NA	CGCAAAAATCAACATA	TATGTTGATTTTTGCG	5.40016	AGTAAAAATCAACATC	GATGTTGATTTTTACT	2.88534	GCATAAAATCAAACTT	AAGTTTGATTTTATGC	2.07185	GCAGAAAATCAAAGTA	TACTTTGATTTTCTGC	NA	GTAAAAAATCAATATA	TATATTGATTTTTTAC	1.67177	GCGAAAAATCAATTCA	TGAATTGATTTTTCGC	1.04837	NA	0.0825272	0.227764	-1.65531	NA	-1.09174
AAAATCAC	GTGATTTT	5.43728	ACAAAAAATCACGTCG	CGACGTGATTTTTTGT	NA	CGCAAAAATCACCATA	TATGGTGATTTTTGCG	6.46148	AGTAAAAATCACCATC	GATGGTGATTTTTACT	2.9769	GCATAAAATCACACTT	AAGTGTGATTTTATGC	NA	GCAGAAAATCACAGTA	TACTGTGATTTTCTGC	NA	GTAAAAAATCACTATA	TATAGTGATTTTTTAC	NA	GCGAAAAATCACTTCA	TGAAGTGATTTTTCGC	2.32787	NA	1.33211	0.320255	NA	NA	NA
AAAATCAG	CTGATTTT	3.51104	ACAAAAAATCAGGTCG	CGACCTGATTTTTTGT	NA	CGCAAAAATCAGCATA	TATGCTGATTTTTGCG	6.25139	AGTAAAAATCAGCATC	GATGCTGATTTTTACT	2.4103	GCATAAAATCAGACTT	AAGTCTGATTTTATGC	2.85276	GCAGAAAATCAGAGTA	TACTCTGATTTTCTGC	2.41069	GTAAAAAATCAGTATA	TATACTGATTTTTTAC	1.31199	GCGAAAAATCAGTTCA	TGAACTGATTTTTCGC	-0.417012	NA	1.08475	-0.252144	-1.00433	-0.385093	-1.46518
AAAATCAT	ATGATTTT	4.7728	ACAAAAAATCATGTCG	CGACATGATTTTTTGT	NA	CGCAAAAATCATCATA	TATGATGATTTTTGCG	6.35023	AGTAAAAATCATCATC	GATGATGATTTTTACT	3.28542	GCATAAAATCATACTT	AAGTATGATTTTATGC	2.89853	GCAGAAAATCATAGTA	TACTATGATTTTCTGC	2.51544	GTAAAAAATCATTATA	TATAATGATTTTTTAC	NA	GCGAAAAATCATTTCA	TGAAATGATTTTTCGC	1.38099	NA	1.20113	0.631937	-0.966179	-0.287705	NA
AAAATCCA	TGGATTTT	4.18004	ACAAAAAATCCAGTCG	CGACTGGATTTTTTGT	NA	CGCAAAAATCCACATA	TATGTGGATTTTTGCG	5.93128	AGTAAAAATCCACATC	GATGTGGATTTTTACT	1.96729	GCATAAAATCCAACTT	AAGTTGGATTTTATGC	4.05934	GCAGAAAATCCAAGTA	TACTTGGATTTTCTGC	NA	GTAAAAAATCCATATA	TATATGGATTTTTTAC	NA	GCGAAAAATCCATTCA	TGAATGGATTTTTCGC	0.53631	NA	0.707858	-0.699688	0.00149264	NA	NA
AAAATCCC	GGGATTTT	3.57865	ACAAAAAATCCCGTCG	CGACGGGATTTTTTGT	NA	CGCAAAAATCCCCATA	TATGGGGATTTTTGCG	5.83426	AGTAAAAATCCCCATC	GATGGGGATTTTTACT	2.23424	GCATAAAATCCCACTT	AAGTGGGATTTTATGC	1.55697	GCAGAAAATCCCAGTA	TACTGGGATTTTCTGC	2.01171	GTAAAAAATCCCTATA	TATAGGGATTTTTTAC	NA	GCGAAAAATCCCTTCA	TGAAGGGATTTTTCGC	-0.320666	NA	0.593628	-0.430002	-2.08452	-0.756029	NA
AAAATCCG	CGGATTTT	5.22155	ACAAAAAATCCGGTCG	CGACCGGATTTTTTGT	NA	CGCAAAAATCCGCATA	TATGCGGATTTTTGCG	6.15345	AGTAAAAATCCGCATC	GATGCGGATTTTTACT	1.54496	GCATAAAATCCGACTT	AAGTCGGATTTTATGC	3.30679	GCAGAAAATCCGAGTA	TACTCGGATTTTCTGC	3.57582	GTAAAAAATCCGTATA	TATACGGATTTTTTAC	1.55282	GCGAAAAATCCGTTCA	TGAACGGATTTTTCGC	2.02045	NA	0.969444	-1.12633	-0.625845	0.698134	-1.2152
AAAATCCT	AGGATTTT	2.23581	ACAAAAAATCCTGTCG	CGACAGGATTTTTTGT	NA	CGCAAAAATCCTCATA	TATGAGGATTTTTGCG	5.06099	AGTAAAAATCCTCATC	GATGAGGATTTTTACT	1.03856	GCATAAAATCCTACTT	AAGTAGGATTTTATGC	1.8992	GCAGAAAATCCTAGTA	TACTAGGATTTTCTGC	3.26861	GTAAAAAATCCTTATA	TATAAGGATTTTTTAC	NA	GCGAAAAATCCTTTCA	TGAAAGGATTTTTCGC	-2.23421	NA	-0.316808	-1.63792	-1.79923	0.412523	NA
AAAATCGA	TCGATTTT	3.32034	ACAAAAAATCGAGTCG	CGACTCGATTTTTTGT	NA	CGCAAAAATCGACATA	TATGTCGATTTTTGCG	5.40977	AGTAAAAATCGACATC	GATGTCGATTTTTACT	2.40555	GCATAAAATCGAACTT	AAGTTCGATTTTATGC	NA	GCAGAAAATCGAAGTA	TACTTCGATTTTCTGC	1.19387	GTAAAAAATCGATATA	TATATCGATTTTTTAC	NA	GCGAAAAATCGATTCA	TGAATCGATTTTTCGC	-0.688766	NA	0.0938473	-0.256935	NA	-1.51638	NA
AAAATCGC	GCGATTTT	4.3833	ACAAAAAATCGCGTCG	CGACGCGATTTTTTGT	NA	CGCAAAAATCGCCATA	TATGGCGATTTTTGCG	4.24642	AGTAAAAATCGCCATC	GATGGCGATTTTTACT	3.05038	GCATAAAATCGCACTT	AAGTGCGATTTTATGC	2.60532	GCAGAAAATCGCAGTA	TACTGCGATTTTCTGC	3.30308	GTAAAAAATCGCTATA	TATAGCGATTTTTTAC	NA	GCGAAAAATCGCTTCA	TGAAGCGATTTTTCGC	0.825959	NA	-1.27587	0.394494	-1.2106	0.444572	NA
AAAATCGG	CCGATTTT	4.16917	ACAAAAAATCGGGTCG	CGACCCGATTTTTTGT	4.03971	CGCAAAAATCGGCATA	TATGCCGATTTTTGCG	5.8128	AGTAAAAATCGGCATC	GATGCCGATTTTTACT	2.47256	GCATAAAATCGGACTT	AAGTCCGATTTTATGC	1.54628	GCAGAAAATCGGAGTA	TACTCCGATTTTCTGC	2.60714	GTAAAAAATCGGTATA	TATACCGATTTTTTAC	NA	GCGAAAAATCGGTTCA	TGAACCGATTTTTCGC	0.520823	-1.11959	0.568362	-0.189245	-2.09343	-0.20245	NA
AAAATCGT	ACGATTTT	4.69961	ACAAAAAATCGTGTCG	CGACACGATTTTTTGT	4.51073	CGCAAAAATCGTCATA	TATGACGATTTTTGCG	5.50731	AGTAAAAATCGTCATC	GATGACGATTTTTACT	3.13495	GCATAAAATCGTACTT	AAGTACGATTTTATGC	2.02686	GCAGAAAATCGTAGTA	TACTACGATTTTCTGC	2.58159	GTAAAAAATCGTTATA	TATAACGATTTTTTAC	1.87747	GCGAAAAATCGTTTCA	TGAAACGATTTTTCGC	1.2767	-0.492026	0.20869	0.479928	-1.69282	-0.226208	-0.878226
AAAATCTA	TAGATTTT	4.07844	ACAAAAAATCTAGTCG	CGACTAGATTTTTTGT	3.34727	CGCAAAAATCTACATA	TATGTAGATTTTTGCG	6.4708	AGTAAAAATCTACATC	GATGTAGATTTTTACT	2.19316	GCATAAAATCTAACTT	AAGTTAGATTTTATGC	2.98079	GCAGAAAATCTAAGTA	TACTTAGATTTTCTGC	2.04961	GTAAAAAATCTATATA	TATATAGATTTTTTAC	1.30625	GCGAAAAATCTATTCA	TGAATAGATTTTTCGC	0.391525	-2.04217	1.34309	-0.471502	-0.897602	-0.720794	-1.47114
AAAATCTC	GAGATTTT	4.49782	ACAAAAAATCTCGTCG	CGACGAGATTTTTTGT	NA	CGCAAAAATCTCCATA	TATGGAGATTTTTGCG	6.00384	AGTAAAAATCTCCATC	GATGGAGATTTTTACT	3.52291	GCATAAAATCTCACTT	AAGTGAGATTTTATGC	3.14717	GCAGAAAATCTCAGTA	TACTGAGATTTTCTGC	NA	GTAAAAAATCTCTATA	TATAGAGATTTTTTAC	NA	GCGAAAAATCTCTTCA	TGAAGAGATTTTTCGC	0.989146	NA	0.793291	0.871854	-0.758909	NA	NA
AAAATCTG	CAGATTTT	5.02333	ACAAAAAATCTGGTCG	CGACCAGATTTTTTGT	NA	CGCAAAAATCTGCATA	TATGCAGATTTTTGCG	5.43755	AGTAAAAATCTGCATC	GATGCAGATTTTTACT	3.17592	GCATAAAATCTGACTT	AAGTCAGATTTTATGC	4.59606	GCAGAAAATCTGAGTA	TACTCAGATTTTCTGC	3.54348	GTAAAAAATCTGTATA	TATACAGATTTTTTAC	NA	GCGAAAAATCTGTTCA	TGAACAGATTTTTCGC	1.73799	NA	0.126551	0.521316	0.448911	0.668071	NA
AAAATCTT	AAGATTTT	4.59362	ACAAAAAATCTTGTCG	CGACAAGATTTTTTGT	NA	CGCAAAAATCTTCATA	TATGAAGATTTTTGCG	5.41854	AGTAAAAATCTTCATC	GATGAAGATTTTTACT	2.84327	GCATAAAATCTTACTT	AAGTAAGATTTTATGC	3.45685	GCAGAAAATCTTAGTA	TACTAAGATTTTCTGC	2.62246	GTAAAAAATCTTTATA	TATAAAGATTTTTTAC	1.77038	GCGAAAAATCTTTTCA	TGAAAAGATTTTTCGC	1.12566	NA	0.104173	0.185262	-0.50075	-0.18821	-0.989386
AAAATGAA	TTCATTTT	3.62197	ACAAAAAATGAAGTCG	CGACTTCATTTTTTGT	NA	CGCAAAAATGAACATA	TATGTTCATTTTTGCG	5.85573	AGTAAAAATGAACATC	GATGTTCATTTTTACT	2.57534	GCATAAAATGAAACTT	AAGTTTCATTTTATGC	NA	GCAGAAAATGAAAGTA	TACTTTCATTTTCTGC	3.00123	GTAAAAAATGAATATA	TATATTCATTTTTTAC	3.05584	GCGAAAAATGAATTCA	TGAATTCATTTTTCGC	-0.258946	NA	0.618906	-0.0854134	NA	0.163937	0.344898
AAAATGAC	GTCATTTT	4.21553	ACAAAAAATGACGTCG	CGACGTCATTTTTTGT	NA	CGCAAAAATGACCATA	TATGGTCATTTTTGCG	5.40736	AGTAAAAATGACCATC	GATGGTCATTTTTACT	1.64653	GCATAAAATGACACTT	AAGTGTCATTTTATGC	2.72865	GCAGAAAATGACAGTA	TACTGTCATTTTCTGC	4.03371	GTAAAAAATGACTATA	TATAGTCATTTTTTAC	2.23339	GCGAAAAATGACTTCA	TGAAGTCATTTTTCGC	0.586877	NA	0.0910015	-1.02373	-1.10779	1.12384	-0.508791
AAAATGAG	CTCATTTT	4.564	ACAAAAAATGAGGTCG	CGACCTCATTTTTTGT	4.48967	CGCAAAAATGAGCATA	TATGCTCATTTTTGCG	5.2645	AGTAAAAATGAGCATC	GATGCTCATTTTTACT	3.14606	GCATAAAATGAGACTT	AAGTCTCATTTTATGC	2.54762	GCAGAAAATGAGAGTA	TACTCTCATTTTCTGC	3.3785	GTAAAAAATGAGTATA	TATACTCATTTTTTAC	1.91282	GCGAAAAATGAGTTCA	TGAACTCATTTTTCGC	1.08345	-0.520091	-0.0771918	0.491152	-1.2587	0.514689	-0.841534
AAAATGAT	ATCATTTT	4.12967	ACAAAAAATGATGTCG	CGACATCATTTTTTGT	NA	CGCAAAAATGATCATA	TATGATCATTTTTGCG	5.67516	AGTAAAAATGATCATC	GATGATCATTTTTACT	3.09112	GCATAAAATGATACTT	AAGTATCATTTTATGC	3.05892	GCAGAAAATGATAGTA	TACTATCATTTTCTGC	NA	GTAAAAAATGATTATA	TATAATCATTTTTTAC	1.27853	GCGAAAAATGATTTCA	TGAAATCATTTTTCGC	0.46453	NA	0.406307	0.435648	-0.832473	NA	-1.49992
AAAATGCA	TGCATTTT	2.89234	ACAAAAAATGCAGTCG	CGACTGCATTTTTTGT	NA	CGCAAAAATGCACATA	TATGTGCATTTTTGCG	4.98587	AGTAAAAATGCACATC	GATGTGCATTTTTACT	0.461548	GCATAAAATGCAACTT	AAGTTGCATTTTATGC	1.52039	GCAGAAAATGCAAGTA	TACTTGCATTTTCTGC	2.71384	GTAAAAAATGCATATA	TATATGCATTTTTTAC	NA	GCGAAAAATGCATTCA	TGAATGCATTTTTCGC	-1.29866	NA	-0.405246	-2.22084	-2.11501	-0.103254	NA
AAAATGCC	GGCATTTT	4.212	ACAAAAAATGCCGTCG	CGACGGCATTTTTTGT	NA	CGCAAAAATGCCCATA	TATGGGCATTTTTGCG	5.40783	AGTAAAAATGCCCATC	GATGGGCATTTTTACT	2.81491	GCATAAAATGCCACTT	AAGTGGCATTTTATGC	3.64548	GCAGAAAATGCCAGTA	TACTGGCATTTTCTGC	1.58596	GTAAAAAATGCCTATA	TATAGGCATTTTTTAC	2.96473	GCGAAAAATGCCTTCA	TGAAGGCATTTTTCGC	0.581847	NA	0.0915591	0.156616	-0.34351	-1.15185	0.250321
AAAATGCG	CGCATTTT	3.80201	ACAAAAAATGCGGTCG	CGACCGCATTTTTTGT	5.21156	CGCAAAAATGCGCATA	TATGCGCATTTTTGCG	5.9084	AGTAAAAATGCGCATC	GATGCGCATTTTTACT	3.17955	GCATAAAATGCGACTT	AAGTCGCATTTTATGC	3.96108	GCAGAAAATGCGAGTA	TACTCGCATTTTCTGC	3.83265	GTAAAAAATGCGTATA	TATACGCATTTTTTAC	2.34353	GCGAAAAATGCGTTCA	TGAACGCATTTTTCGC	-0.00238521	0.441726	0.680927	0.52498	-0.0804154	0.936915	-0.394471
AAAATGCT	AGCATTTT	4.27052	ACAAAAAATGCTGTCG	CGACAGCATTTTTTGT	NA	CGCAAAAATGCTCATA	TATGAGCATTTTTGCG	6.05528	AGTAAAAATGCTCATC	GATGAGCATTTTTACT	2.08667	GCATAAAATGCTACTT	AAGTAGCATTTTATGC	3.34108	GCAGAAAATGCTAGTA	TACTAGCATTTTCTGC	4.62597	GTAAAAAATGCTTATA	TATAAGCATTTTTTAC	2.3049	GCGAAAAATGCTTTCA	TGAAAGCATTTTTCGC	0.665245	NA	0.853864	-0.579081	-0.597255	1.67447	-0.434558
AAAATGGA	TCCATTTT	2.42907	ACAAAAAATGGAGTCG	CGACTCCATTTTTTGT	5.56718	CGCAAAAATGGACATA	TATGTCCATTTTTGCG	5.04348	AGTAAAAATGGACATC	GATGTCCATTTTTACT	2.52961	GCATAAAATGGAACTT	AAGTTCCATTTTATGC	3.91773	GCAGAAAATGGAAGTA	TACTTCCATTTTCTGC	4.2796	GTAAAAAATGGATATA	TATATCCATTTTTTAC	2.38808	GCGAAAAATGGATTCA	TGAATCCATTTTTCGC	-1.95881	0.915533	-0.337424	-0.131606	-0.116557	1.35244	-0.348222
AAAATGGC	GCCATTTT	3.20245	ACAAAAAATGGCGTCG	CGACGCCATTTTTTGT	4.00789	CGCAAAAATGGCCATA	TATGGCCATTTTTGCG	4.88423	AGTAAAAATGGCCATC	GATGGCCATTTTTACT	1.68652	GCATAAAATGGCACTT	AAGTGCCATTTTATGC	1.90995	GCAGAAAATGGCAGTA	TACTGCCATTTTCTGC	2.18919	GTAAAAAATGGCTATA	TATAGCCATTTTTTAC	1.71285	GCGAAAAATGGCTTCA	TGAAGCCATTTTTCGC	-0.856753	-1.16199	-0.524923	-0.983326	-1.79027	-0.591025	-1.0491
AAAATGGG	CCCATTTT	3.44696	ACAAAAAATGGGGTCG	CGACCCCATTTTTTGT	5.32588	CGCAAAAATGGGCATA	TATGCCCATTTTTGCG	5.44654	AGTAAAAATGGGCATC	GATGCCCATTTTTACT	1.95518	GCATAAAATGGGACTT	AAGTCCCATTTTATGC	1.7352	GCAGAAAATGGGAGTA	TACTCCCATTTTCTGC	2.92022	GTAAAAAATGGGTATA	TATACCCATTTTTTAC	2.70203	GCGAAAAATGGGTTCA	TGAACCCATTTTTCGC	-0.508326	0.594036	0.137136	-0.711918	-1.93595	0.0886241	-0.0223547
AAAATGGT	ACCATTTT	3.70816	ACAAAAAATGGTGTCG	CGACACCATTTTTTGT	5.23694	CGCAAAAATGGTCATA	TATGACCATTTTTGCG	4.89274	AGTAAAAATGGTCATC	GATGACCATTTTTACT	NA	GCATAAAATGGTACTT	AAGTACCATTTTATGC	2.38594	GCAGAAAATGGTAGTA	TACTACCATTTTCTGC	1.25715	GTAAAAAATGGTTATA	TATAACCATTTTTTAC	2.21053	GCGAAAAATGGTTTCA	TGAAACCATTTTTCGC	-0.136117	0.47554	-0.514893	NA	-1.39348	-1.45755	-0.532518
AAAATGTA	TACATTTT	4.27392	ACAAAAAATGTAGTCG	CGACTACATTTTTTGT	4.41969	CGCAAAAATGTACATA	TATGTACATTTTTGCG	5.55404	AGTAAAAATGTACATC	GATGTACATTTTTACT	1.5834	GCATAAAATGTAACTT	AAGTTACATTTTATGC	3.35378	GCAGAAAATGTAAGTA	TACTTACATTTTCTGC	4.17432	GTAAAAAATGTATATA	TATATACATTTTTTAC	2.95348	GCGAAAAATGTATTCA	TGAATACATTTTTCGC	0.670089	-0.613328	0.263711	-1.0875	-0.586669	1.25457	0.238648
AAAATGTC	GACATTTT	4.19359	ACAAAAAATGTCGTCG	CGACGACATTTTTTGT	NA	CGCAAAAATGTCCATA	TATGGACATTTTTGCG	6.03937	AGTAAAAATGTCCATC	GATGGACATTTTTACT	2.38322	GCATAAAATGTCACTT	AAGTGACATTTTATGC	1.74365	GCAGAAAATGTCAGTA	TACTGACATTTTCTGC	2.62207	GTAAAAAATGTCTATA	TATAGACATTTTTTAC	2.59072	GCGAAAAATGTCTTCA	TGAAGACATTTTTCGC	0.555623	NA	0.835126	-0.279495	-1.9289	-0.188574	-0.137893
AAAATGTG	CACATTTT	4.34034	ACAAAAAATGTGGTCG	CGACCACATTTTTTGT	5.62855	CGCAAAAATGTGCATA	TATGCACATTTTTGCG	5.24086	AGTAAAAATGTGCATC	GATGCACATTTTTACT	3.02312	GCATAAAATGTGACTT	AAGTCACATTTTATGC	4.02299	GCAGAAAATGTGAGTA	TACTCACATTTTCTGC	4.33661	GTAAAAAATGTGTATA	TATACACATTTTTTAC	3.61491	GCGAAAAATGTGTTCA	TGAACACATTTTTCGC	0.76473	0.997295	-0.105025	0.36695	-0.0288121	1.40545	0.925194
AAAATGTT	AACATTTT	4.58374	ACAAAAAATGTTGTCG	CGACAACATTTTTTGT	5.60331	CGCAAAAATGTTCATA	TATGAACATTTTTGCG	5.55484	AGTAAAAATGTTCATC	GATGAACATTTTTACT	2.03254	GCATAAAATGTTACTT	AAGTAACATTTTATGC	1.48637	GCAGAAAATGTTAGTA	TACTAACATTTTCTGC	4.62276	GTAAAAAATGTTTATA	TATAAACATTTTTTAC	2.9071	GCGAAAAATGTTTTCA	TGAAAACATTTTTCGC	1.11158	0.963669	0.264645	-0.633767	-2.14337	1.67149	0.190503
AAAATTAA	TTAATTTT	3.67297	ACAAAAAATTAAGTCG	CGACTTAATTTTTTGT	3.78716	CGCAAAAATTAACATA	TATGTTAATTTTTGCG	4.85538	AGTAAAAATTAACATC	GATGTTAATTTTTACT	2.36323	GCATAAAATTAAACTT	AAGTTTAATTTTATGC	3.00298	GCAGAAAATTAAAGTA	TACTTTAATTTTCTGC	NA	GTAAAAAATTAATATA	TATATTAATTTTTTAC	2.64781	GCGAAAAATTAATTCA	TGAATTAATTTTTCGC	-0.186265	-1.45608	-0.558887	-0.299688	-0.879105	NA	-0.0786269
AAAATTAC	GTAATTTT	4.47629	ACAAAAAATTACGTCG	CGACGTAATTTTTTGT	NA	CGCAAAAATTACCATA	TATGGTAATTTTTGCG	5.02285	AGTAAAAATTACCATC	GATGGTAATTTTTACT	2.05094	GCATAAAATTACACTT	AAGTGTAATTTTATGC	2.80282	GCAGAAAATTACAGTA	TACTGTAATTTTCTGC	NA	GTAAAAAATTACTATA	TATAGTAATTTTTTAC	2.77384	GCGAAAAATTACTTCA	TGAAGTAATTTTTCGC	0.958461	NA	-0.361708	-0.615175	-1.04596	NA	0.0521884
AAAATTAG	CTAATTTT	4.25993	ACAAAAAATTAGGTCG	CGACCTAATTTTTTGT	4.0415	CGCAAAAATTAGCATA	TATGCTAATTTTTGCG	5.18063	AGTAAAAATTAGCATC	GATGCTAATTTTTACT	2.41236	GCATAAAATTAGACTT	AAGTCTAATTTTATGC	2.38575	GCAGAAAATTAGAGTA	TACTCTAATTTTCTGC	2.81538	GTAAAAAATTAGTATA	TATACTAATTTTTTAC	NA	GCGAAAAATTAGTTCA	TGAACTAATTTTTCGC	0.650153	-1.11721	-0.175941	-0.250061	-1.39364	-0.00884475	NA
AAAATTAT	ATAATTTT	4.5706	ACAAAAAATTATGTCG	CGACATAATTTTTTGT	NA	CGCAAAAATTATCATA	TATGATAATTTTTGCG	4.74122	AGTAAAAATTATCATC	GATGATAATTTTTACT	2.40686	GCATAAAATTATACTT	AAGTATAATTTTATGC	4.4679	GCAGAAAATTATAGTA	TACTATAATTTTCTGC	NA	GTAAAAAATTATTATA	TATAATAATTTTTTAC	1.95041	GCGAAAAATTATTTCA	TGAAATAATTTTTCGC	1.09285	NA	-0.693298	-0.255617	0.342073	NA	-0.802517
AAAATTCA	TGAATTTT	4.08449	ACAAAAAATTCAGTCG	CGACTGAATTTTTTGT	NA	CGCAAAAATTCACATA	TATGTGAATTTTTGCG	5.35644	AGTAAAAATTCACATC	GATGTGAATTTTTACT	2.23732	GCATAAAATTCAACTT	AAGTTGAATTTTATGC	3.96086	GCAGAAAATTCAAGTA	TACTTGAATTTTCTGC	NA	GTAAAAAATTCATATA	TATATGAATTTTTTAC	3.21962	GCGAAAAATTCATTCA	TGAATGAATTTTTCGC	0.400151	NA	0.0310555	-0.426892	-0.0805986	NA	0.514895
AAAATTCC	GGAATTTT	4.68319	ACAAAAAATTCCGTCG	CGACGGAATTTTTTGT	NA	CGCAAAAATTCCCATA	TATGGGAATTTTTGCG	6.71818	AGTAAAAATTCCCATC	GATGGGAATTTTTACT	3.78008	GCATAAAATTCCACTT	AAGTGGAATTTTATGC	4.56522	GCAGAAAATTCCAGTA	TACTGGAATTTTCTGC	4.50493	GTAAAAAATTCCTATA	TATAGGAATTTTTTAC	NA	GCGAAAAATTCCTTCA	TGAAGGAATTTTTCGC	1.2533	NA	1.63435	1.13166	0.423198	1.56194	NA
AAAATTCG	CGAATTTT	4.11011	ACAAAAAATTCGGTCG	CGACCGAATTTTTTGT	4.1082	CGCAAAAATTCGCATA	TATGCGAATTTTTGCG	5.79979	AGTAAAAATTCGCATC	GATGCGAATTTTTACT	2.39418	GCATAAAATTCGACTT	AAGTCGAATTTTATGC	3.16232	GCAGAAAATTCGAGTA	TACTCGAATTTTCTGC	4.10813	GTAAAAAATTCGTATA	TATACGAATTTTTTAC	2.86313	GCGAAAAATTCGTTCA	TGAACGAATTTTTCGC	0.436657	-1.02834	0.553043	-0.268422	-0.74628	1.19303	0.144872
AAAATTCT	AGAATTTT	3.94364	ACAAAAAATTCTGTCG	CGACAGAATTTTTTGT	4.39472	CGCAAAAATTCTCATA	TATGAGAATTTTTGCG	6.02773	AGTAAAAATTCTCATC	GATGAGAATTTTTACT	2.54306	GCATAAAATTCTACTT	AAGTAGAATTTTATGC	4.09737	GCAGAAAATTCTAGTA	TACTAGAATTTTCTGC	4.44178	GTAAAAAATTCTTATA	TATAAGAATTTTTTAC	3.39599	GCGAAAAATTCTTTCA	TGAAAGAATTTTTCGC	0.19944	-0.646598	0.821423	-0.118017	0.0331969	1.50323	0.697963
AAAATTGA	TCAATTTT	4.29085	ACAAAAAATTGAGTCG	CGACTCAATTTTTTGT	4.2493	CGCAAAAATTGACATA	TATGTCAATTTTTGCG	5.13032	AGTAAAAATTGACATC	GATGTCAATTTTTACT	2.45181	GCATAAAATTGAACTT	AAGTTCAATTTTATGC	1.68478	GCAGAAAATTGAAGTA	TACTTCAATTTTCTGC	3.23357	GTAAAAAATTGATATA	TATATCAATTTTTTAC	1.55859	GCGAAAAATTGATTCA	TGAATCAATTTTTCGC	0.694216	-0.840342	-0.235173	-0.210207	-1.97798	0.379942	-1.20921
AAAATTGC	GCAATTTT	4.37623	ACAAAAAATTGCGTCG	CGACGCAATTTTTTGT	4.93614	CGCAAAAATTGCCATA	TATGGCAATTTTTGCG	5.65722	AGTAAAAATTGCCATC	GATGGCAATTTTTACT	NA	GCATAAAATTGCACTT	AAGTGCAATTTTATGC	NA	GCAGAAAATTGCAGTA	TACTGCAATTTTCTGC	4.23695	GTAAAAAATTGCTATA	TATAGCAATTTTTTAC	2.65554	GCGAAAAATTGCTTCA	TGAAGCAATTTTTCGC	0.815883	0.0747717	0.385194	NA	NA	1.31279	-0.0706081
AAAATTGG	CCAATTTT	3.40825	ACAAAAAATTGGGTCG	CGACCCAATTTTTTGT	4.90742	CGCAAAAATTGGCATA	TATGCCAATTTTTGCG	5.32629	AGTAAAAATTGGCATC	GATGCCAATTTTTACT	1.91673	GCATAAAATTGGACTT	AAGTCCAATTTTATGC	1.98193	GCAGAAAATTGGAGTA	TACTCCAATTTTCTGC	2.53484	GTAAAAAATTGGTATA	TATACCAATTTTTTAC	1.66326	GCGAAAAATTGGTTCA	TGAACCAATTTTTCGC	-0.563493	0.036499	-0.00444847	-0.750758	-1.73026	-0.269666	-1.10058
AAAATTGT	ACAATTTT	4.27984	ACAAAAAATTGTGTCG	CGACACAATTTTTTGT	5.39034	CGCAAAAATTGTCATA	TATGACAATTTTTGCG	5.61779	AGTAAAAATTGTCATC	GATGACAATTTTTACT	2.64119	GCATAAAATTGTACTT	AAGTACAATTTTATGC	3.90634	GCAGAAAATTGTAGTA	TACTACAATTTTCTGC	2.879	GTAAAAAATTGTTATA	TATAACAATTTTTTAC	2.29519	GCGAAAAATTGTTTCA	TGAAACAATTTTTCGC	0.678529	0.679926	0.33876	-0.0188853	-0.126049	0.0503006	-0.444641
AAAATTTA	TAAATTTT	4.11641	ACAAAAAATTTAGTCG	CGACTAAATTTTTTGT	NA	CGCAAAAATTTACATA	TATGTAAATTTTTGCG	5.43125	AGTAAAAATTTACATC	GATGTAAATTTTTACT	1.97261	GCATAAAATTTAACTT	AAGTTAAATTTTATGC	3.39459	GCAGAAAATTTAAGTA	TACTTAAATTTTCTGC	NA	GTAAAAAATTTATATA	TATATAAATTTTTTAC	2.51042	GCGAAAAATTTATTCA	TGAATAAATTTTTCGC	0.445636	NA	0.119137	-0.694309	-0.552656	NA	-0.221237
AAAATTTC	GAAATTTT	4.67448	ACAAAAAATTTCGTCG	CGACGAAATTTTTTGT	5.05568	CGCAAAAATTTCCATA	TATGGAAATTTTTGCG	5.4044	AGTAAAAATTTCCATC	GATGGAAATTTTTACT	1.75578	GCATAAAATTTCACTT	AAGTGAAATTTTATGC	4.10768	GCAGAAAATTTCAGTA	TACTGAAATTTTCTGC	1.70091	GTAAAAAATTTCTATA	TATAGAAATTTTTTAC	2.25069	GCGAAAAATTTCTTCA	TGAAGAAATTTTTCGC	1.24088	0.234031	0.0875171	-0.913358	0.0417927	-1.04498	-0.490831
AAAATTTG	CAAATTTT	4.1626	ACAAAAAATTTGGTCG	CGACCAAATTTTTTGT	5.55985	CGCAAAAATTTGCATA	TATGCAAATTTTTGCG	5.56771	AGTAAAAATTTGCATC	GATGCAAATTTTTACT	2.57744	GCATAAAATTTGACTT	AAGTCAAATTTTATGC	3.92141	GCAGAAAATTTGAGTA	TACTCAAATTTTCTGC	4.10446	GTAAAAAATTTGTATA	TATACAAATTTTTTAC	2.99847	GCGAAAAATTTGTTCA	TGAACAAATTTTTCGC	0.511457	0.905769	0.279804	-0.0832902	-0.113483	1.18962	0.285343
AAAATTTT	AAAATTTT	4.47668	ACAAAAAATTTTGTCG	CGACAAAATTTTTTGT	NA	CGCAAAAATTTTCATA	TATGAAAATTTTTGCG	4.6218	AGTAAAAATTTTCATC	GATGAAAATTTTTACT	2.95584	GCATAAAATTTTACTT	AAGTAAAATTTTATGC	3.35458	GCAGAAAATTTTAGTA	TACTAAAATTTTCTGC	3.11158	GTAAAAAATTTTTATA	TATAAAAATTTTTTAC	2.75447	GCGAAAAATTTTTTCA	TGAAAAAATTTTTCGC	0.959019	NA	-0.833901	0.298979	-0.586008	0.266529	0.0320849
AAACAAAA	TTTTGTTT	3.64807	ACAAAAACAAAAGTCG	CGACTTTTGTTTTTGT	NA	CGCAAAACAAAACATA	TATGTTTTGTTTTGCG	5.73063	AGTAAAACAAAACATC	GATGTTTTGTTTTACT	1.58908	GCATAAACAAAAACTT	AAGTTTTTGTTTATGC	3.75845	GCAGAAACAAAAAGTA	TACTTTTTGTTTCTGC	NA	GTAAAAACAAAATATA	TATATTTTGTTTTTAC	NA	GCGAAAACAAAATTCA	TGAATTTTGTTTTCGC	-0.22174	NA	0.471618	-1.08176	-0.24933	NA	NA
AAACAAAC	GTTTGTTT	4.74023	ACAAAAACAAACGTCG	CGACGTTTGTTTTTGT	NA	CGCAAAACAAACCATA	TATGGTTTGTTTTGCG	6.33839	AGTAAAACAAACCATC	GATGGTTTGTTTTACT	2.92734	GCATAAACAAACACTT	AAGTGTTTGTTTATGC	NA	GCAGAAACAAACAGTA	TACTGTTTGTTTCTGC	NA	GTAAAAACAAACTATA	TATAGTTTGTTTTTAC	NA	GCGAAAACAAACTTCA	TGAAGTTTGTTTTCGC	1.33458	NA	1.18719	0.270192	NA	NA	NA
AAACAAAG	CTTTGTTT	3.08936	ACAAAAACAAAGGTCG	CGACCTTTGTTTTTGT	3.04996	CGCAAAACAAAGCATA	TATGCTTTGTTTTGCG	6.51982	AGTAAAACAAAGCATC	GATGCTTTGTTTTACT	2.96839	GCATAAACAAAGACTT	AAGTCTTTGTTTATGC	NA	GCAGAAACAAAGAGTA	TACTCTTTGTTTCTGC	NA	GTAAAAACAAAGTATA	TATACTTTGTTTTTAC	NA	GCGAAAACAAAGTTCA	TGAACTTTGTTTTCGC	-1.01791	-2.43829	1.4008	0.311659	NA	NA	NA
AAACAAAT	ATTTGTTT	4.33626	ACAAAAACAAATGTCG	CGACATTTGTTTTTGT	NA	CGCAAAACAAATCATA	TATGATTTGTTTTGCG	5.90105	AGTAAAACAAATCATC	GATGATTTGTTTTACT	3.0763	GCATAAACAAATACTT	AAGTATTTGTTTATGC	2.96473	GCAGAAACAAATAGTA	TACTATTTGTTTCTGC	3.6183	GTAAAAACAAATTATA	TATAATTTGTTTTTAC	NA	GCGAAAACAAATTTCA	TGAAATTTGTTTTCGC	0.758918	NA	0.672271	0.420679	-0.910994	0.73763	NA
AAACAACA	TGTTGTTT	3.8103	ACAAAAACAACAGTCG	CGACTGTTGTTTTTGT	NA	CGCAAAACAACACATA	TATGTGTTGTTTTGCG	NA	AGTAAAACAACACATC	GATGTGTTGTTTTACT	3.1243	GCATAAACAACAACTT	AAGTTGTTGTTTATGC	4.34029	GCAGAAACAACAAGTA	TACTTGTTGTTTCTGC	NA	GTAAAAACAACATATA	TATATGTTGTTTTTAC	NA	GCGAAAACAACATTCA	TGAATGTTGTTTTCGC	0.00942298	NA	NA	0.469171	0.235696	NA	NA
AAACAACC	GGTTGTTT	4.50042	ACAAAAACAACCGTCG	CGACGGTTGTTTTTGT	NA	CGCAAAACAACCCATA	TATGGGTTGTTTTGCG	NA	AGTAAAACAACCCATC	GATGGGTTGTTTTACT	NA	GCATAAACAACCACTT	AAGTGGTTGTTTATGC	3.05745	GCAGAAACAACCAGTA	TACTGGTTGTTTCTGC	NA	GTAAAAACAACCTATA	TATAGGTTGTTTTTAC	NA	GCGAAAACAACCTTCA	TGAAGGTTGTTTTCGC	0.992855	NA	NA	NA	-0.833697	NA	NA
AAACAACG	CGTTGTTT	4.44534	ACAAAAACAACGGTCG	CGACCGTTGTTTTTGT	NA	CGCAAAACAACGCATA	TATGCGTTGTTTTGCG	5.19884	AGTAAAACAACGCATC	GATGCGTTGTTTTACT	3.83405	GCATAAACAACGACTT	AAGTCGTTGTTTATGC	NA	GCAGAAACAACGAGTA	TACTCGTTGTTTCTGC	NA	GTAAAAACAACGTATA	TATACGTTGTTTTTAC	NA	GCGAAAACAACGTTCA	TGAACGTTGTTTTCGC	0.914361	NA	-0.154504	1.18619	NA	NA	NA
AAACAACT	AGTTGTTT	4.34417	ACAAAAACAACTGTCG	CGACAGTTGTTTTTGT	NA	CGCAAAACAACTCATA	TATGAGTTGTTTTGCG	6.13125	AGTAAAACAACTCATC	GATGAGTTGTTTTACT	2.80637	GCATAAACAACTACTT	AAGTAGTTGTTTATGC	3.70817	GCAGAAACAACTAGTA	TACTAGTTGTTTCTGC	3.35012	GTAAAAACAACTTATA	TATAAGTTGTTTTTAC	0.721072	GCGAAAACAACTTTCA	TGAAAGTTGTTTTCGC	0.7702	NA	0.943303	0.147984	-0.291246	0.4883	-2.07854
AAACAAGA	TCTTGTTT	3.41803	ACAAAAACAAGAGTCG	CGACTCTTGTTTTTGT	NA	CGCAAAACAAGACATA	TATGTCTTGTTTTGCG	5.40908	AGTAAAACAAGACATC	GATGTCTTGTTTTACT	1.91872	GCATAAACAAGAACTT	AAGTTCTTGTTTATGC	NA	GCAGAAACAAGAAGTA	TACTTCTTGTTTCTGC	NA	GTAAAAACAAGATATA	TATATCTTGTTTTTAC	NA	GCGAAAACAAGATTCA	TGAATCTTGTTTTCGC	-0.54956	NA	0.0930376	-0.748755	NA	NA	NA
AAACAAGC	GCTTGTTT	4.0016	ACAAAAACAAGCGTCG	CGACGCTTGTTTTTGT	NA	CGCAAAACAAGCCATA	TATGGCTTGTTTTGCG	6.25621	AGTAAAACAAGCCATC	GATGGCTTGTTTTACT	NA	GCATAAACAAGCACTT	AAGTGCTTGTTTATGC	3.47066	GCAGAAACAAGCAGTA	TACTGCTTGTTTCTGC	NA	GTAAAAACAAGCTATA	TATAGCTTGTTTTTAC	NA	GCGAAAACAAGCTTCA	TGAAGCTTGTTTTCGC	0.282026	NA	1.09043	NA	-0.48924	NA	NA
AAACAAGG	CCTTGTTT	3.83573	ACAAAAACAAGGGTCG	CGACCCTTGTTTTTGT	NA	CGCAAAACAAGGCATA	TATGCCTTGTTTTGCG	5.37089	AGTAAAACAAGGCATC	GATGCCTTGTTTTACT	NA	GCATAAACAAGGACTT	AAGTCCTTGTTTATGC	1.58596	GCAGAAACAAGGAGTA	TACTCCTTGTTTCTGC	NA	GTAAAAACAAGGTATA	TATACCTTGTTTTTAC	1.7599	GCGAAAACAAGGTTCA	TGAACCTTGTTTTCGC	0.0456738	NA	0.0480676	NA	-2.06035	NA	-1.00026
AAACAAGT	ACTTGTTT	4.78717	ACAAAAACAAGTGTCG	CGACACTTGTTTTTGT	4.92772	CGCAAAACAAGTCATA	TATGACTTGTTTTGCG	5.61337	AGTAAAACAAGTCATC	GATGACTTGTTTTACT	3.14674	GCATAAACAAGTACTT	AAGTACTTGTTTATGC	3.76755	GCAGAAACAAGTAGTA	TACTACTTGTTTCTGC	2.23715	GTAAAAACAAGTTATA	TATAACTTGTTTTTAC	3.80757	GCGAAAACAAGTTTCA	TGAAACTTGTTTTCGC	1.40147	0.0635425	0.333562	0.491838	-0.241748	-0.54643	1.12518
AAACAATA	TATTGTTT	4.19514	ACAAAAACAATAGTCG	CGACTATTGTTTTTGT	NA	CGCAAAACAATACATA	TATGTATTGTTTTGCG	6.9729	AGTAAAACAATACATC	GATGTATTGTTTTACT	2.52053	GCATAAACAATAACTT	AAGTTATTGTTTATGC	NA	GCAGAAACAATAAGTA	TACTTATTGTTTCTGC	NA	GTAAAAACAATATATA	TATATATTGTTTTTAC	2.02242	GCGAAAACAATATTCA	TGAATATTGTTTTCGC	0.557822	NA	1.93425	-0.140784	NA	NA	-0.727767
AAACAATC	GATTGTTT	4.24695	ACAAAAACAATCGTCG	CGACGATTGTTTTTGT	NA	CGCAAAACAATCCATA	TATGGATTGTTTTGCG	6.12547	AGTAAAACAATCCATC	GATGGATTGTTTTACT	3.7423	GCATAAACAATCACTT	AAGTGATTGTTTATGC	3.53151	GCAGAAACAATCAGTA	TACTGATTGTTTCTGC	NA	GTAAAAACAATCTATA	TATAGATTGTTTTTAC	1.78155	GCGAAAACAATCTTCA	TGAAGATTGTTTTCGC	0.631657	NA	0.936503	1.09349	-0.438514	NA	-0.977786
AAACAATG	CATTGTTT	3.23469	ACAAAAACAATGGTCG	CGACCATTGTTTTTGT	NA	CGCAAAACAATGCATA	TATGCATTGTTTTGCG	5.94469	AGTAAAACAATGCATC	GATGCATTGTTTTACT	3.03969	GCATAAACAATGACTT	AAGTCATTGTTTATGC	3.18916	GCAGAAACAATGAGTA	TACTCATTGTTTCTGC	1.31919	GTAAAAACAATGTATA	TATACATTGTTTTTAC	2.31331	GCGAAAACAATGTTCA	TGAACATTGTTTTCGC	-0.810809	NA	0.723657	0.38369	-0.723904	-1.39987	-0.425833
AAACAATT	AATTGTTT	4.57556	ACAAAAACAATTGTCG	CGACAATTGTTTTTGT	NA	CGCAAAACAATTCATA	TATGAATTGTTTTGCG	5.93781	AGTAAAACAATTCATC	GATGAATTGTTTTACT	1.61788	GCATAAACAATTACTT	AAGTAATTGTTTATGC	1.30995	GCAGAAACAATTAGTA	TACTAATTGTTTCTGC	NA	GTAAAAACAATTTATA	TATAAATTGTTTTTAC	NA	GCGAAAACAATTTTCA	TGAAAATTGTTTTCGC	1.09993	NA	0.715552	-1.05267	-2.29044	NA	NA
AAACACAA	TTGTGTTT	4.59644	ACAAAAACACAAGTCG	CGACTTGTGTTTTTGT	NA	CGCAAAACACAACATA	TATGTTGTGTTTTGCG	5.95535	AGTAAAACACAACATC	GATGTTGTGTTTTACT	2.64438	GCATAAACACAAACTT	AAGTTTGTGTTTATGC	3.66293	GCAGAAACACAAAGTA	TACTTTGTGTTTCTGC	NA	GTAAAAACACAATATA	TATATTGTGTTTTTAC	NA	GCGAAAACACAATTCA	TGAATTGTGTTTTCGC	1.12968	NA	0.7362	-0.0156635	-0.328959	NA	NA
AAACACAC	GTGTGTTT	3.44388	ACAAAAACACACGTCG	CGACGTGTGTTTTTGT	NA	CGCAAAACACACCATA	TATGGTGTGTTTTGCG	NA	AGTAAAACACACCATC	GATGGTGTGTTTTACT	3.1974	GCATAAACACACACTT	AAGTGTGTGTTTATGC	NA	GCAGAAACACACAGTA	TACTGTGTGTTTCTGC	NA	GTAAAAACACACTATA	TATAGTGTGTTTTTAC	NA	GCGAAAACACACTTCA	TGAAGTGTGTTTTCGC	-0.512715	NA	NA	0.543017	NA	NA	NA
AAACACAG	CTGTGTTT	NA	ACAAAAACACAGGTCG	CGACCTGTGTTTTTGT	2.79065	CGCAAAACACAGCATA	TATGCTGTGTTTTGCG	5.53771	AGTAAAACACAGCATC	GATGCTGTGTTTTACT	2.58534	GCATAAACACAGACTT	AAGTCTGTGTTTATGC	NA	GCAGAAACACAGAGTA	TACTCTGTGTTTCTGC	3.47796	GTAAAAACACAGTATA	TATACTGTGTTTTTAC	3.25894	GCGAAAACACAGTTCA	TGAACTGTGTTTTCGC	NA	-2.78378	0.244476	-0.0753104	NA	0.607153	0.555708
AAACACAT	ATGTGTTT	5.09655	ACAAAAACACATGTCG	CGACATGTGTTTTTGT	NA	CGCAAAACACATCATA	TATGATGTGTTTTGCG	5.57437	AGTAAAACACATCATC	GATGATGTGTTTTACT	4.33727	GCATAAACACATACTT	AAGTATGTGTTTATGC	NA	GCAGAAACACATAGTA	TACTATGTGTTTCTGC	4.13453	GTAAAAACACATTATA	TATAATGTGTTTTTAC	NA	GCGAAAACACATTTCA	TGAAATGTGTTTTCGC	1.84234	NA	0.287647	1.69455	NA	1.21757	NA
AAACACCA	TGGTGTTT	4.78792	ACAAAAACACCAGTCG	CGACTGGTGTTTTTGT	NA	CGCAAAACACCACATA	TATGTGGTGTTTTGCG	5.13192	AGTAAAACACCACATC	GATGTGGTGTTTTACT	NA	GCATAAACACCAACTT	AAGTTGGTGTTTATGC	NA	GCAGAAACACCAAGTA	TACTTGGTGTTTCTGC	NA	GTAAAAACACCATATA	TATATGGTGTTTTTAC	NA	GCGAAAACACCATTCA	TGAATGGTGTTTTCGC	1.40254	NA	-0.233295	NA	NA	NA	NA
AAACACCC	GGGTGTTT	3.86585	ACAAAAACACCCGTCG	CGACGGGTGTTTTTGT	NA	CGCAAAACACCCCATA	TATGGGGTGTTTTGCG	5.98919	AGTAAAACACCCCATC	GATGGGGTGTTTTACT	2.85667	GCATAAACACCCACTT	AAGTGGGTGTTTATGC	NA	GCAGAAACACCCAGTA	TACTGGGTGTTTCTGC	NA	GTAAAAACACCCTATA	TATAGGGTGTTTTTAC	NA	GCGAAAACACCCTTCA	TGAAGGGTGTTTTCGC	0.08859	NA	0.776051	0.1988	NA	NA	NA
AAACACCG	CGGTGTTT	3.63263	ACAAAAACACCGGTCG	CGACCGGTGTTTTTGT	NA	CGCAAAACACCGCATA	TATGCGGTGTTTTGCG	4.79544	AGTAAAACACCGCATC	GATGCGGTGTTTTACT	NA	GCATAAACACCGACTT	AAGTCGGTGTTTATGC	4.13439	GCAGAAACACCGAGTA	TACTCGGTGTTTCTGC	1.96201	GTAAAAACACCGTATA	TATACGGTGTTTTTAC	NA	GCGAAAACACCGTTCA	TGAACGGTGTTTTCGC	-0.243748	NA	-0.629463	NA	0.0640552	-0.80223	NA
AAACACCT	AGGTGTTT	2.15749	ACAAAAACACCTGTCG	CGACAGGTGTTTTTGT	NA	CGCAAAACACCTCATA	TATGAGGTGTTTTGCG	4.2674	AGTAAAACACCTCATC	GATGAGGTGTTTTACT	NA	GCATAAACACCTACTT	AAGTAGGTGTTTATGC	2.22441	GCAGAAACACCTAGTA	TACTAGGTGTTTCTGC	NA	GTAAAAACACCTTATA	TATAAGGTGTTTTTAC	NA	GCGAAAACACCTTTCA	TGAAAGGTGTTTTCGC	-2.34582	NA	-1.25117	NA	-1.52813	NA	NA
AAACACGA	TCGTGTTT	4.31613	ACAAAAACACGAGTCG	CGACTCGTGTTTTTGT	NA	CGCAAAACACGACATA	TATGTCGTGTTTTGCG	5.89287	AGTAAAACACGACATC	GATGTCGTGTTTTACT	3.08262	GCATAAACACGAACTT	AAGTTCGTGTTTATGC	NA	GCAGAAACACGAAGTA	TACTTCGTGTTTCTGC	NA	GTAAAAACACGATATA	TATATCGTGTTTTTAC	NA	GCGAAAACACGATTCA	TGAATCGTGTTTTCGC	0.730234	NA	0.662639	0.427061	NA	NA	NA
AAACACGC	GCGTGTTT	4.27449	ACAAAAACACGCGTCG	CGACGCGTGTTTTTGT	NA	CGCAAAACACGCCATA	TATGGCGTGTTTTGCG	6.6766	AGTAAAACACGCCATC	GATGGCGTGTTTTACT	2.66481	GCATAAACACGCACTT	AAGTGCGTGTTTATGC	NA	GCAGAAACACGCAGTA	TACTGCGTGTTTCTGC	NA	GTAAAAACACGCTATA	TATAGCGTGTTTTTAC	NA	GCGAAAACACGCTTCA	TGAAGCGTGTTTTCGC	0.670901	NA	1.58539	0.00497277	NA	NA	NA
AAACACGG	CCGTGTTT	3.45025	ACAAAAACACGGGTCG	CGACCCGTGTTTTTGT	3.64324	CGCAAAACACGGCATA	TATGCCGTGTTTTGCG	5.0587	AGTAAAACACGGCATC	GATGCCGTGTTTTACT	1.72995	GCATAAACACGGACTT	AAGTCCGTGTTTATGC	NA	GCAGAAACACGGAGTA	TACTCCGTGTTTCTGC	1.93709	GTAAAAACACGGTATA	TATACCGTGTTTTTAC	NA	GCGAAAACACGGTTCA	TGAACCGTGTTTTCGC	-0.503641	-1.64783	-0.319499	-0.939457	NA	-0.825405	NA
AAACACGT	ACGTGTTT	4.85705	ACAAAAACACGTGTCG	CGACACGTGTTTTTGT	NA	CGCAAAACACGTCATA	TATGACGTGTTTTGCG	6.86265	AGTAAAACACGTCATC	GATGACGTGTTTTACT	2.08291	GCATAAACACGTACTT	AAGTACGTGTTTATGC	3.80472	GCAGAAACACGTAGTA	TACTACGTGTTTCTGC	2.4707	GTAAAAACACGTTATA	TATAACGTGTTTTTAC	NA	GCGAAAACACGTTTCA	TGAAACGTGTTTTCGC	1.50105	NA	1.80445	-0.58288	-0.210759	-0.329298	NA
AAACACTA	TAGTGTTT	4.41595	ACAAAAACACTAGTCG	CGACTAGTGTTTTTGT	NA	CGCAAAACACTACATA	TATGTAGTGTTTTGCG	5.92715	AGTAAAACACTACATC	GATGTAGTGTTTTACT	NA	GCATAAACACTAACTT	AAGTTAGTGTTTATGC	NA	GCAGAAACACTAAGTA	TACTTAGTGTTTCTGC	2.95573	GTAAAAACACTATATA	TATATAGTGTTTTTAC	NA	GCGAAAACACTATTCA	TGAATAGTGTTTTCGC	0.872481	NA	0.702996	NA	NA	0.12164	NA
AAACACTC	GAGTGTTT	4.1604	ACAAAAACACTCGTCG	CGACGAGTGTTTTTGT	NA	CGCAAAACACTCCATA	TATGGAGTGTTTTGCG	5.28644	AGTAAAACACTCCATC	GATGGAGTGTTTTACT	2.8961	GCATAAACACTCACTT	AAGTGAGTGTTTATGC	NA	GCAGAAACACTCAGTA	TACTGAGTGTTTCTGC	NA	GTAAAAACACTCTATA	TATAGAGTGTTTTTAC	NA	GCGAAAACACTCTTCA	TGAAGAGTGTTTTCGC	0.508324	NA	-0.0513586	0.238628	NA	NA	NA
AAACACTG	CAGTGTTT	3.49252	ACAAAAACACTGGTCG	CGACCAGTGTTTTTGT	3.49857	CGCAAAACACTGCATA	TATGCAGTGTTTTGCG	5.65453	AGTAAAACACTGCATC	GATGCAGTGTTTTACT	2.4748	GCATAAACACTGACTT	AAGTCAGTGTTTATGC	NA	GCAGAAACACTGAGTA	TACTCAGTGTTTCTGC	3.48553	GTAAAAACACTGTATA	TATACAGTGTTTTTAC	1.82434	GCGAAAACACTGTTCA	TGAACAGTGTTTTCGC	-0.44341	-1.84058	0.382023	-0.186975	NA	0.614199	-0.933372
AAACACTT	AAGTGTTT	4.38152	ACAAAAACACTTGTCG	CGACAAGTGTTTTTGT	NA	CGCAAAACACTTCATA	TATGAAGTGTTTTGCG	4.98233	AGTAAAACACTTCATC	GATGAAGTGTTTTACT	2.48354	GCATAAACACTTACTT	AAGTAAGTGTTTATGC	NA	GCAGAAACACTTAGTA	TACTAAGTGTTTCTGC	3.86704	GTAAAAACACTTTATA	TATAAAGTGTTTTTAC	2.50447	GCGAAAACACTTTTCA	TGAAAAGTGTTTTCGC	0.823424	NA	-0.409421	-0.178151	NA	0.968887	-0.227415
AAACAGAA	TTCTGTTT	4.36785	ACAAAAACAGAAGTCG	CGACTTCTGTTTTTGT	NA	CGCAAAACAGAACATA	TATGTTCTGTTTTGCG	5.69996	AGTAAAACAGAACATC	GATGTTCTGTTTTACT	2.00842	GCATAAACAGAAACTT	AAGTTTCTGTTTATGC	4.21078	GCAGAAACAGAAAGTA	TACTTTCTGTTTCTGC	NA	GTAAAAACAGAATATA	TATATTCTGTTTTTAC	NA	GCGAAAACAGAATTCA	TGAATTCTGTTTTCGC	0.803944	NA	0.435507	-0.658129	0.127735	NA	NA
AAACAGAC	GTCTGTTT	4.45419	ACAAAAACAGACGTCG	CGACGTCTGTTTTTGT	NA	CGCAAAACAGACCATA	TATGGTCTGTTTTGCG	NA	AGTAAAACAGACCATC	GATGGTCTGTTTTACT	4.21706	GCATAAACAGACACTT	AAGTGTCTGTTTATGC	NA	GCAGAAACAGACAGTA	TACTGTCTGTTTCTGC	NA	GTAAAAACAGACTATA	TATAGTCTGTTTTTAC	NA	GCGAAAACAGACTTCA	TGAAGTCTGTTTTCGC	0.926973	NA	NA	1.57311	NA	NA	NA
AAACAGAG	CTCTGTTT	3.99309	ACAAAAACAGAGGTCG	CGACCTCTGTTTTTGT	NA	CGCAAAACAGAGCATA	TATGCTCTGTTTTGCG	5.17156	AGTAAAACAGAGCATC	GATGCTCTGTTTTACT	2.38602	GCATAAACAGAGACTT	AAGTCTCTGTTTATGC	4.92628	GCAGAAACAGAGAGTA	TACTCTCTGTTTCTGC	NA	GTAAAAACAGAGTATA	TATACTCTGTTTTTAC	NA	GCGAAAACAGAGTTCA	TGAACTCTGTTTTCGC	0.269907	NA	-0.186617	-0.276664	0.724189	NA	NA
AAACAGAT	ATCTGTTT	5.65294	ACAAAAACAGATGTCG	CGACATCTGTTTTTGT	NA	CGCAAAACAGATCATA	TATGATCTGTTTTGCG	6.06767	AGTAAAACAGATCATC	GATGATCTGTTTTACT	3.5837	GCATAAACAGATACTT	AAGTATCTGTTTATGC	6.45656	GCAGAAACAGATAGTA	TACTATCTGTTTCTGC	NA	GTAAAAACAGATTATA	TATAATCTGTTTTTAC	2.12986	GCGAAAACAGATTTCA	TGAAATCTGTTTTCGC	2.63518	NA	0.86845	0.933273	1.99985	NA	-0.616246
AAACAGCA	TGCTGTTT	4.79872	ACAAAAACAGCAGTCG	CGACTGCTGTTTTTGT	NA	CGCAAAACAGCACATA	TATGTGCTGTTTTGCG	6.35648	AGTAAAACAGCACATC	GATGTGCTGTTTTACT	NA	GCATAAACAGCAACTT	AAGTTGCTGTTTATGC	5.29341	GCAGAAACAGCAAGTA	TACTTGCTGTTTCTGC	4.55845	GTAAAAACAGCATATA	TATATGCTGTTTTTAC	3.32167	GCGAAAACAGCATTCA	TGAATGCTGTTTTCGC	1.41792	NA	1.20849	NA	1.03023	1.6117	0.620824
AAACAGCC	GGCTGTTT	4.32292	ACAAAAACAGCCGTCG	CGACGGCTGTTTTTGT	NA	CGCAAAACAGCCCATA	TATGGGCTGTTTTGCG	6.80762	AGTAAAACAGCCCATC	GATGGGCTGTTTTACT	3.07457	GCATAAACAGCCACTT	AAGTGGCTGTTTATGC	4.22247	GCAGAAACAGCCAGTA	TACTGGCTGTTTCTGC	NA	GTAAAAACAGCCTATA	TATAGGCTGTTTTTAC	NA	GCGAAAACAGCCTTCA	TGAAGGCTGTTTTCGC	0.739908	NA	1.73965	0.418924	0.13748	NA	NA
AAACAGCG	CGCTGTTT	4.64554	ACAAAAACAGCGGTCG	CGACCGCTGTTTTTGT	NA	CGCAAAACAGCGCATA	TATGCGCTGTTTTGCG	5.27675	AGTAAAACAGCGCATC	GATGCGCTGTTTTACT	2.69829	GCATAAACAGCGACTT	AAGTCGCTGTTTATGC	NA	GCAGAAACAGCGAGTA	TACTCGCTGTTTCTGC	3.49218	GTAAAAACAGCGTATA	TATACGCTGTTTTTAC	3.36733	GCGAAAACAGCGTTCA	TGAACGCTGTTTTCGC	1.19965	NA	-0.0627732	0.0388028	NA	0.620378	0.668214
AAACAGCT	AGCTGTTT	5.62286	ACAAAAACAGCTGTCG	CGACAGCTGTTTTTGT	NA	CGCAAAACAGCTCATA	TATGAGCTGTTTTGCG	5.35993	AGTAAAACAGCTCATC	GATGAGCTGTTTTACT	3.34113	GCATAAACAGCTACTT	AAGTAGCTGTTTATGC	3.892	GCAGAAACAGCTAGTA	TACTAGCTGTTTCTGC	3.71111	GTAAAAACAGCTTATA	TATAAGCTGTTTTTAC	2.63327	GCGAAAACAGCTTTCA	TGAAAGCTGTTTTCGC	2.59233	NA	0.0351592	0.688213	-0.138002	0.823917	-0.0937218
AAACAGGA	TCCTGTTT	3.25341	ACAAAAACAGGAGTCG	CGACTCCTGTTTTTGT	NA	CGCAAAACAGGACATA	TATGTCCTGTTTTGCG	NA	AGTAAAACAGGACATC	GATGTCCTGTTTTACT	2.86546	GCATAAACAGGAACTT	AAGTTCCTGTTTATGC	NA	GCAGAAACAGGAAGTA	TACTTCCTGTTTCTGC	4.22759	GTAAAAACAGGATATA	TATATCCTGTTTTTAC	NA	GCGAAAACAGGATTCA	TGAATCCTGTTTTCGC	-0.784143	NA	NA	0.207679	NA	1.3041	NA
AAACAGGC	GCCTGTTT	3.41842	ACAAAAACAGGCGTCG	CGACGCCTGTTTTTGT	NA	CGCAAAACAGGCCATA	TATGGCCTGTTTTGCG	6.27636	AGTAAAACAGGCCATC	GATGGCCTGTTTTACT	2.22674	GCATAAACAGGCACTT	AAGTGCCTGTTTATGC	3.63636	GCAGAAACAGGCAGTA	TACTGCCTGTTTCTGC	3.38652	GTAAAAACAGGCTATA	TATAGCCTGTTTTTAC	2.31523	GCGAAAACAGGCTTCA	TGAAGCCTGTTTTCGC	-0.548998	NA	1.11415	-0.437582	-0.351113	0.522142	-0.423841
AAACAGGG	CCCTGTTT	3.67092	ACAAAAACAGGGGTCG	CGACCCCTGTTTTTGT	4.82401	CGCAAAACAGGGCATA	TATGCCCTGTTTTGCG	5.30582	AGTAAAACAGGGCATC	GATGCCCTGTTTTACT	1.89625	GCATAAACAGGGACTT	AAGTCCCTGTTTATGC	3.38789	GCAGAAACAGGGAGTA	TACTCCCTGTTTCTGC	2.53128	GTAAAAACAGGGTATA	TATACCCTGTTTTTAC	2.14811	GCGAAAACAGGGTTCA	TGAACCCTGTTTTCGC	-0.189182	-0.0746251	-0.0285448	-0.771449	-0.558242	-0.272976	-0.597309
AAACAGGT	ACCTGTTT	3.38218	ACAAAAACAGGTGTCG	CGACACCTGTTTTTGT	4.29611	CGCAAAACAGGTCATA	TATGACCTGTTTTGCG	5.12195	AGTAAAACAGGTCATC	GATGACCTGTTTTACT	NA	GCATAAACAGGTACTT	AAGTACCTGTTTATGC	NA	GCAGAAACAGGTAGTA	TACTACCTGTTTCTGC	1.81777	GTAAAAACAGGTTATA	TATAACCTGTTTTTAC	NA	GCGAAAACAGGTTTCA	TGAAACCTGTTTTCGC	-0.600641	-0.777985	-0.245033	NA	NA	-0.936333	NA
AAACAGTA	TACTGTTT	3.63174	ACAAAAACAGTAGTCG	CGACTACTGTTTTTGT	NA	CGCAAAACAGTACATA	TATGTACTGTTTTGCG	5.69265	AGTAAAACAGTACATC	GATGTACTGTTTTACT	2.02551	GCATAAACAGTAACTT	AAGTTACTGTTTATGC	NA	GCAGAAACAGTAAGTA	TACTTACTGTTTCTGC	3.30379	GTAAAAACAGTATATA	TATATACTGTTTTTAC	NA	GCGAAAACAGTATTCA	TGAATACTGTTTTCGC	-0.245015	NA	0.426903	-0.640872	NA	0.445226	NA
AAACAGTC	GACTGTTT	5.11685	ACAAAAACAGTCGTCG	CGACGACTGTTTTTGT	NA	CGCAAAACAGTCCATA	TATGGACTGTTTTGCG	5.60135	AGTAAAACAGTCCATC	GATGGACTGTTTTACT	3.14866	GCATAAACAGTCACTT	AAGTGACTGTTTATGC	3.45073	GCAGAAACAGTCAGTA	TACTGACTGTTTCTGC	3.35963	GTAAAAACAGTCTATA	TATAGACTGTTTTTAC	2.98968	GCGAAAACAGTCTTCA	TGAAGACTGTTTTCGC	1.87126	NA	0.319414	0.493775	-0.505854	0.497143	0.27622
AAACAGTG	CACTGTTT	3.41399	ACAAAAACAGTGGTCG	CGACCACTGTTTTTGT	5.45171	CGCAAAACAGTGCATA	TATGCACTGTTTTGCG	5.40692	AGTAAAACAGTGCATC	GATGCACTGTTTTACT	2.74186	GCATAAACAGTGACTT	AAGTCACTGTTTATGC	4.91805	GCAGAAACAGTGAGTA	TACTCACTGTTTCTGC	2.76071	GTAAAAACAGTGTATA	TATACACTGTTTTTAC	3.78832	GCGAAAACAGTGTTCA	TGAACACTGTTTTCGC	-0.555307	0.76169	0.0904912	0.0828146	0.717325	-0.0596762	1.1052
AAACAGTT	AACTGTTT	4.34851	ACAAAAACAGTTGTCG	CGACAACTGTTTTTGT	4.5339	CGCAAAACAGTTCATA	TATGAACTGTTTTGCG	5.24773	AGTAAAACAGTTCATC	GATGAACTGTTTTACT	0.834148	GCATAAACAGTTACTT	AAGTAACTGTTTATGC	1.99714	GCAGAAACAGTTAGTA	TACTAACTGTTTCTGC	2.54154	GTAAAAACAGTTTATA	TATAAACTGTTTTTAC	2.01774	GCGAAAACAGTTTTCA	TGAAAACTGTTTTCGC	0.776382	-0.461164	-0.0969393	-1.84442	-1.71759	-0.263437	-0.732628
AAACATAA	TTATGTTT	4.64981	ACAAAAACATAAGTCG	CGACTTATGTTTTTGT	NA	CGCAAAACATAACATA	TATGTTATGTTTTGCG	6.20241	AGTAAAACATAACATC	GATGTTATGTTTTACT	3.32461	GCATAAACATAAACTT	AAGTTTATGTTTATGC	4.0697	GCAGAAACATAAAGTA	TACTTTATGTTTCTGC	2.20924	GTAAAAACATAATATA	TATATTATGTTTTTAC	NA	GCGAAAACATAATTCA	TGAATTATGTTTTCGC	1.20573	NA	1.02709	0.671531	0.0101262	-0.572384	NA
AAACATAC	GTATGTTT	4.39224	ACAAAAACATACGTCG	CGACGTATGTTTTTGT	NA	CGCAAAACATACCATA	TATGGTATGTTTTGCG	5.39246	AGTAAAACATACCATC	GATGGTATGTTTTACT	2.08803	GCATAAACATACACTT	AAGTGTATGTTTATGC	4.92786	GCAGAAACATACAGTA	TACTGTATGTTTCTGC	NA	GTAAAAACATACTATA	TATAGTATGTTTTTAC	NA	GCGAAAACATACTTCA	TGAAGTATGTTTTCGC	0.838686	NA	0.0734594	-0.577705	0.725502	NA	NA
AAACATAG	CTATGTTT	3.99552	ACAAAAACATAGGTCG	CGACCTATGTTTTTGT	NA	CGCAAAACATAGCATA	TATGCTATGTTTTGCG	5.47685	AGTAAAACATAGCATC	GATGCTATGTTTTACT	2.28211	GCATAAACATAGACTT	AAGTCTATGTTTATGC	3.56453	GCAGAAACATAGAGTA	TACTCTATGTTTCTGC	NA	GTAAAAACATAGTATA	TATACTATGTTTTTAC	NA	GCGAAAACATAGTTCA	TGAACTATGTTTTCGC	0.273367	NA	0.172824	-0.381645	-0.410992	NA	NA
AAACATAT	ATATGTTT	5.13155	ACAAAAACATATGTCG	CGACATATGTTTTTGT	NA	CGCAAAACATATCATA	TATGATATGTTTTGCG	6.08917	AGTAAAACATATCATC	GATGATATGTTTTACT	3.27697	GCATAAACATATACTT	AAGTATATGTTTATGC	NA	GCAGAAACATATAGTA	TACTATATGTTTCTGC	3.09865	GTAAAAACATATTATA	TATAATATGTTTTTAC	NA	GCGAAAACATATTTCA	TGAAATATGTTTTCGC	1.89221	NA	0.893761	0.623404	NA	0.254507	NA
AAACATCA	TGATGTTT	4.23756	ACAAAAACATCAGTCG	CGACTGATGTTTTTGT	NA	CGCAAAACATCACATA	TATGTGATGTTTTGCG	5.55083	AGTAAAACATCACATC	GATGTGATGTTTTACT	3.03574	GCATAAACATCAACTT	AAGTTGATGTTTATGC	4.10337	GCAGAAACATCAAGTA	TACTTGATGTTTCTGC	3.97679	GTAAAAACATCATATA	TATATGATGTTTTTAC	NA	GCGAAAACATCATTCA	TGAATGATGTTTTCGC	0.618281	NA	0.259928	0.379705	0.0382	1.07092	NA
AAACATCC	GGATGTTT	5.1715	ACAAAAACATCCGTCG	CGACGGATGTTTTTGT	NA	CGCAAAACATCCCATA	TATGGGATGTTTTGCG	5.99938	AGTAAAACATCCCATC	GATGGGATGTTTTACT	4.27366	GCATAAACATCCACTT	AAGTGGATGTTTATGC	4.18526	GCAGAAACATCCAGTA	TACTGGATGTTTCTGC	NA	GTAAAAACATCCTATA	TATAGGATGTTTTTAC	NA	GCGAAAACATCCTTCA	TGAAGGATGTTTTCGC	1.94913	NA	0.788041	1.63029	0.10646	NA	NA
AAACATCG	CGATGTTT	4.04005	ACAAAAACATCGGTCG	CGACCGATGTTTTTGT	5.11304	CGCAAAACATCGCATA	TATGCGATGTTTTGCG	5.49341	AGTAAAACATCGCATC	GATGCGATGTTTTACT	3.64326	GCATAAACATCGACTT	AAGTCGATGTTTATGC	3.27688	GCAGAAACATCGAGTA	TACTCGATGTTTCTGC	3.28125	GTAAAAACATCGTATA	TATACGATGTTTTTAC	NA	GCGAAAACATCGTTCA	TGAACGATGTTTTCGC	0.336818	0.310454	0.192324	0.993444	-0.650776	0.424274	NA
AAACATCT	AGATGTTT	5.41956	ACAAAAACATCTGTCG	CGACAGATGTTTTTGT	NA	CGCAAAACATCTCATA	TATGAGATGTTTTGCG	5.21867	AGTAAAACATCTCATC	GATGAGATGTTTTACT	3.60291	GCATAAACATCTACTT	AAGTAGATGTTTATGC	4.66676	GCAGAAACATCTAGTA	TACTAGATGTTTCTGC	NA	GTAAAAACATCTTATA	TATAAGATGTTTTTAC	2.60044	GCGAAAACATCTTTCA	TGAAAGATGTTTTCGC	2.30262	NA	-0.131148	0.952674	0.507845	NA	-0.127801
AAACATGA	TCATGTTT	5.55099	ACAAAAACATGAGTCG	CGACTCATGTTTTTGT	NA	CGCAAAACATGACATA	TATGTCATGTTTTGCG	5.55567	AGTAAAACATGACATC	GATGTCATGTTTTACT	2.32025	GCATAAACATGAACTT	AAGTTCATGTTTATGC	3.33228	GCAGAAACATGAAGTA	TACTTCATGTTTCTGC	4.02947	GTAAAAACATGATATA	TATATCATGTTTTTAC	4.24314	GCGAAAACATGATTCA	TGAATCATGTTTTCGC	2.48991	NA	0.265631	-0.343107	-0.604597	1.1199	1.57729
AAACATGC	GCATGTTT	4.06993	ACAAAAACATGCGTCG	CGACGCATGTTTTTGT	5.73083	CGCAAAACATGCCATA	TATGGCATGTTTTGCG	6.78247	AGTAAAACATGCCATC	GATGGCATGTTTTACT	2.45661	GCATAAACATGCACTT	AAGTGCATGTTTATGC	3.15482	GCAGAAACATGCAGTA	TACTGCATGTTTCTGC	NA	GTAAAAACATGCTATA	TATAGCATGTTTTTAC	3.39465	GCGAAAACATGCTTCA	TGAAGCATGTTTTCGC	0.379409	1.13357	1.71004	-0.205353	-0.752529	NA	0.696576
AAACATGG	CCATGTTT	4.35475	ACAAAAACATGGGTCG	CGACCCATGTTTTTGT	NA	CGCAAAACATGGCATA	TATGCCATGTTTTGCG	5.66481	AGTAAAACATGGCATC	GATGCCATGTTTTACT	2.82995	GCATAAACATGGACTT	AAGTCCATGTTTATGC	3.27133	GCAGAAACATGGAGTA	TACTCCATGTTTCTGC	3.27776	GTAAAAACATGGTATA	TATACCATGTTTTTAC	3.55993	GCGAAAACATGGTTCA	TGAACCATGTTTTCGC	0.785276	NA	0.394123	0.171803	-0.655399	0.42103	0.868134
AAACATGT	ACATGTTT	5.11542	ACAAAAACATGTGTCG	CGACACATGTTTTTGT	NA	CGCAAAACATGTCATA	TATGACATGTTTTGCG	6.11563	AGTAAAACATGTCATC	GATGACATGTTTTACT	2.3699	GCATAAACATGTACTT	AAGTACATGTTTATGC	4.99206	GCAGAAACATGTAGTA	TACTACATGTTTCTGC	3.48418	GTAAAAACATGTTATA	TATAACATGTTTTTAC	4.30069	GCGAAAACATGTTTCA	TGAAACATGTTTTCGC	1.86922	NA	0.92491	-0.292954	0.77902	0.61294	1.63703
AAACATTA	TAATGTTT	4.76914	ACAAAAACATTAGTCG	CGACTAATGTTTTTGT	NA	CGCAAAACATTACATA	TATGTAATGTTTTGCG	5.14195	AGTAAAACATTACATC	GATGTAATGTTTTACT	3.48736	GCATAAACATTAACTT	AAGTTAATGTTTATGC	3.87158	GCAGAAACATTAAGTA	TACTTAATGTTTCTGC	2.94314	GTAAAAACATTATATA	TATATAATGTTTTTAC	NA	GCGAAAACATTATTCA	TGAATAATGTTTTCGC	1.37577	NA	-0.221485	0.83594	-0.155028	0.109935	NA
AAACATTC	GAATGTTT	5.08691	ACAAAAACATTCGTCG	CGACGAATGTTTTTGT	NA	CGCAAAACATTCCATA	TATGGAATGTTTTGCG	6.29823	AGTAAAACATTCCATC	GATGGAATGTTTTACT	3.54187	GCATAAACATTCACTT	AAGTGAATGTTTATGC	4.65443	GCAGAAACATTCAGTA	TACTGAATGTTTCTGC	NA	GTAAAAACATTCTATA	TATAGAATGTTTTTAC	NA	GCGAAAACATTCTTCA	TGAAGAATGTTTTCGC	1.8286	NA	1.13991	0.891016	0.497567	NA	NA
AAACATTG	CAATGTTT	4.21071	ACAAAAACATTGGTCG	CGACCAATGTTTTTGT	3.91406	CGCAAAACATTGCATA	TATGCAATGTTTTGCG	5.65107	AGTAAAACATTGCATC	GATGCAATGTTTTACT	3.05756	GCATAAACATTGACTT	AAGTCAATGTTTATGC	3.83535	GCAGAAACATTGAGTA	TACTCAATGTTTCTGC	4.29057	GTAAAAACATTGTATA	TATACAATGTTTTTAC	2.99169	GCGAAAACATTGTTCA	TGAACAATGTTTTCGC	0.580018	-1.28701	0.377953	0.401745	-0.185232	1.36264	0.278312
AAACATTT	AAATGTTT	4.40193	ACAAAAACATTTGTCG	CGACAAATGTTTTTGT	NA	CGCAAAACATTTCATA	TATGAAATGTTTTGCG	5.64883	AGTAAAACATTTCATC	GATGAAATGTTTTACT	0.948267	GCATAAACATTTACTT	AAGTAAATGTTTATGC	3.98972	GCAGAAACATTTAGTA	TACTAAATGTTTCTGC	3.22229	GTAAAAACATTTTATA	TATAAAATGTTTTTAC	2.78501	GCGAAAACATTTTTCA	TGAAAAATGTTTTCGC	0.852498	NA	0.375307	-1.72914	-0.0565407	0.369459	0.063785
AAACCAAA	TTTGGTTT	3.69041	ACAAAAACCAAAGTCG	CGACTTTGGTTTTTGT	NA	CGCAAAACCAAACATA	TATGTTTGGTTTTGCG	5.30549	AGTAAAACCAAACATC	GATGTTTGGTTTTACT	2.59003	GCATAAACCAAAACTT	AAGTTTTGGTTTATGC	NA	GCAGAAACCAAAAGTA	TACTTTTGGTTTCTGC	NA	GTAAAAACCAAATATA	TATATTTGGTTTTTAC	NA	GCGAAAACCAAATTCA	TGAATTTGGTTTTCGC	-0.16142	NA	-0.0289376	-0.070574	NA	NA	NA
AAACCAAC	GTTGGTTT	3.32461	ACAAAAACCAACGTCG	CGACGTTGGTTTTTGT	NA	CGCAAAACCAACCATA	TATGGTTGGTTTTGCG	4.89387	AGTAAAACCAACCATC	GATGGTTGGTTTTACT	NA	GCATAAACCAACACTT	AAGTGTTGGTTTATGC	NA	GCAGAAACCAACAGTA	TACTGTTGGTTTCTGC	NA	GTAAAAACCAACTATA	TATAGTTGGTTTTTAC	NA	GCGAAAACCAACTTCA	TGAAGTTGGTTTTCGC	-0.682673	NA	-0.513574	NA	NA	NA	NA
AAACCAAG	CTTGGTTT	5.41371	ACAAAAACCAAGGTCG	CGACCTTGGTTTTTGT	NA	CGCAAAACCAAGCATA	TATGCTTGGTTTTGCG	5.3525	AGTAAAACCAAGCATC	GATGCTTGGTTTTACT	1.88525	GCATAAACCAAGACTT	AAGTCTTGGTTTATGC	4.05274	GCAGAAACCAAGAGTA	TACTCTTGGTTTCTGC	NA	GTAAAAACCAAGTATA	TATACTTGGTTTTTAC	NA	GCGAAAACCAAGTTCA	TGAACTTGGTTTTCGC	2.29428	NA	0.0264205	-0.782565	-0.00400896	NA	NA
AAACCAAT	ATTGGTTT	4.70072	ACAAAAACCAATGTCG	CGACATTGGTTTTTGT	NA	CGCAAAACCAATCATA	TATGATTGGTTTTGCG	3.60631	AGTAAAACCAATCATC	GATGATTGGTTTTACT	2.79899	GCATAAACCAATACTT	AAGTATTGGTTTATGC	2.56126	GCAGAAACCAATAGTA	TACTATTGGTTTCTGC	NA	GTAAAAACCAATTATA	TATAATTGGTTTTTAC	NA	GCGAAAACCAATTTCA	TGAAATTGGTTTTCGC	1.27828	NA	-2.02952	0.140532	-1.24733	NA	NA
AAACCACA	TGTGGTTT	3.70884	ACAAAAACCACAGTCG	CGACTGTGGTTTTTGT	NA	CGCAAAACCACACATA	TATGTGTGGTTTTGCG	5.57014	AGTAAAACCACACATC	GATGTGTGGTTTTACT	2.3799	GCATAAACCACAACTT	AAGTTGTGGTTTATGC	4.63465	GCAGAAACCACAAGTA	TACTTGTGGTTTCTGC	NA	GTAAAAACCACATATA	TATATGTGGTTTTTAC	NA	GCGAAAACCACATTCA	TGAATGTGGTTTTCGC	-0.135145	NA	0.282661	-0.282852	0.481079	NA	NA
AAACCACC	GGTGGTTT	4.05943	ACAAAAACCACCGTCG	CGACGGTGGTTTTTGT	NA	CGCAAAACCACCCATA	TATGGGTGGTTTTGCG	4.84411	AGTAAAACCACCCATC	GATGGGTGGTTTTACT	2.72667	GCATAAACCACCACTT	AAGTGGTGGTTTATGC	4.43099	GCAGAAACCACCAGTA	TACTGGTGGTTTCTGC	NA	GTAAAAACCACCTATA	TATAGGTGGTTTTTAC	NA	GCGAAAACCACCTTCA	TGAAGGTGGTTTTCGC	0.364439	NA	-0.572159	0.0674733	0.311306	NA	NA
AAACCACG	CGTGGTTT	3.58936	ACAAAAACCACGGTCG	CGACCGTGGTTTTTGT	NA	CGCAAAACCACGCATA	TATGCGTGGTTTTGCG	5.54228	AGTAAAACCACGCATC	GATGCGTGGTTTTACT	NA	GCATAAACCACGACTT	AAGTCGTGGTTTATGC	NA	GCAGAAACCACGAGTA	TACTCGTGGTTTCTGC	NA	GTAAAAACCACGTATA	TATACGTGGTTTTTAC	NA	GCGAAAACCACGTTCA	TGAACGTGGTTTTCGC	-0.305408	NA	0.249865	NA	NA	NA	NA
AAACCACT	AGTGGTTT	4.4198	ACAAAAACCACTGTCG	CGACAGTGGTTTTTGT	NA	CGCAAAACCACTCATA	TATGAGTGGTTTTGCG	6.18641	AGTAAAACCACTCATC	GATGAGTGGTTTTACT	NA	GCATAAACCACTACTT	AAGTAGTGGTTTATGC	3.64056	GCAGAAACCACTAGTA	TACTAGTGGTTTCTGC	NA	GTAAAAACCACTTATA	TATAAGTGGTTTTTAC	NA	GCGAAAACCACTTTCA	TGAAAGTGGTTTTCGC	0.877969	NA	1.00824	NA	-0.34761	NA	NA
AAACCAGA	TCTGGTTT	4.02009	ACAAAAACCAGAGTCG	CGACTCTGGTTTTTGT	NA	CGCAAAACCAGACATA	TATGTCTGGTTTTGCG	5.67646	AGTAAAACCAGACATC	GATGTCTGGTTTTACT	2.55967	GCATAAACCAGAACTT	AAGTTCTGGTTTATGC	4.06906	GCAGAAACCAGAAGTA	TACTTCTGGTTTCTGC	NA	GTAAAAACCAGATATA	TATATCTGGTTTTTAC	NA	GCGAAAACCAGATTCA	TGAATCTGGTTTTCGC	0.308386	NA	0.407839	-0.101242	0.00959579	NA	NA
AAACCAGC	GCTGGTTT	3.43777	ACAAAAACCAGCGTCG	CGACGCTGGTTTTTGT	NA	CGCAAAACCAGCCATA	TATGGCTGGTTTTGCG	4.63026	AGTAAAACCAGCCATC	GATGGCTGGTTTTACT	NA	GCATAAACCAGCACTT	AAGTGCTGGTTTATGC	3.18932	GCAGAAACCAGCAGTA	TACTGCTGGTTTCTGC	NA	GTAAAAACCAGCTATA	TATAGCTGGTTTTTAC	NA	GCGAAAACCAGCTTCA	TGAAGCTGGTTTTCGC	-0.521426	NA	-0.82394	NA	-0.723772	NA	NA
AAACCAGG	CCTGGTTT	3.98767	ACAAAAACCAGGGTCG	CGACCCTGGTTTTTGT	NA	CGCAAAACCAGGCATA	TATGCCTGGTTTTGCG	5.93159	AGTAAAACCAGGCATC	GATGCCTGGTTTTACT	NA	GCATAAACCAGGACTT	AAGTCCTGGTTTATGC	4.21917	GCAGAAACCAGGAGTA	TACTCCTGGTTTCTGC	NA	GTAAAAACCAGGTATA	TATACCTGGTTTTTAC	NA	GCGAAAACCAGGTTCA	TGAACCTGGTTTTCGC	0.262187	NA	0.708228	NA	0.134732	NA	NA
AAACCAGT	ACTGGTTT	3.67321	ACAAAAACCAGTGTCG	CGACACTGGTTTTTGT	NA	CGCAAAACCAGTCATA	TATGACTGGTTTTGCG	4.55497	AGTAAAACCAGTCATC	GATGACTGGTTTTACT	2.72006	GCATAAACCAGTACTT	AAGTACTGGTTTATGC	3.32532	GCAGAAACCAGTAGTA	TACTACTGGTTTCTGC	0.735775	GTAAAAACCAGTTATA	TATAACTGGTTTTTAC	NA	GCGAAAACCAGTTTCA	TGAAACTGGTTTTCGC	-0.185923	NA	-0.912588	0.0607938	-0.610396	-1.94227	NA
AAACCATA	TATGGTTT	3.18604	ACAAAAACCATAGTCG	CGACTATGGTTTTTGT	NA	CGCAAAACCATACATA	TATGTATGGTTTTGCG	5.62284	AGTAAAACCATACATC	GATGTATGGTTTTACT	1.55275	GCATAAACCATAACTT	AAGTTATGGTTTATGC	NA	GCAGAAACCATAAGTA	TACTTATGGTTTCTGC	NA	GTAAAAACCATATATA	TATATATGGTTTTTAC	1.56938	GCGAAAACCATATTCA	TGAATATGGTTTTCGC	-0.880141	NA	0.344708	-1.11846	NA	NA	-1.19802
AAACCATC	GATGGTTT	4.25008	ACAAAAACCATCGTCG	CGACGATGGTTTTTGT	4.77024	CGCAAAACCATCCATA	TATGGATGGTTTTGCG	5.56611	AGTAAAACCATCCATC	GATGGATGGTTTTACT	2.7712	GCATAAACCATCACTT	AAGTGATGGTTTATGC	3.70771	GCAGAAACCATCAGTA	TACTGATGGTTTCTGC	NA	GTAAAAACCATCTATA	TATAGATGGTTTTTAC	NA	GCGAAAACCATCTTCA	TGAAGATGGTTTTCGC	0.63612	-0.146267	0.277912	0.112457	-0.291632	NA	NA
AAACCATG	CATGGTTT	3.58353	ACAAAAACCATGGTCG	CGACCATGGTTTTTGT	NA	CGCAAAACCATGCATA	TATGCATGGTTTTGCG	6.05886	AGTAAAACCATGCATC	GATGCATGGTTTTACT	2.50983	GCATAAACCATGACTT	AAGTCATGGTTTATGC	5.37888	GCAGAAACCATGAGTA	TACTCATGGTTTCTGC	NA	GTAAAAACCATGTATA	TATACATGGTTTTTAC	NA	GCGAAAACCATGTTCA	TGAACATGGTTTTCGC	-0.313715	NA	0.858071	-0.151588	1.10148	NA	NA
AAACCATT	AATGGTTT	3.85398	ACAAAAACCATTGTCG	CGACAATGGTTTTTGT	4.6337	CGCAAAACCATTCATA	TATGAATGGTTTTGCG	5.76226	AGTAAAACCATTCATC	GATGAATGGTTTTACT	1.53541	GCATAAACCATTACTT	AAGTAATGGTTTATGC	4.02693	GCAGAAACCATTAGTA	TACTAATGGTTTCTGC	1.56368	GTAAAAACCATTTATA	TATAAATGGTTTTTAC	NA	GCGAAAACCATTTTCA	TGAAAATGGTTTTCGC	0.071673	-0.328194	0.508862	-1.13599	-0.0255285	-1.17256	NA
AAACCCAA	TTGGGTTT	4.30514	ACAAAAACCCAAGTCG	CGACTTGGGTTTTTGT	NA	CGCAAAACCCAACATA	TATGTTGGGTTTTGCG	6.03399	AGTAAAACCCAACATC	GATGTTGGGTTTTACT	2.5264	GCATAAACCCAAACTT	AAGTTTGGGTTTATGC	NA	GCAGAAACCCAAAGTA	TACTTTGGGTTTCTGC	NA	GTAAAAACCCAATATA	TATATTGGGTTTTTAC	NA	GCGAAAACCCAATTCA	TGAATTGGGTTTTCGC	0.714577	NA	0.82879	-0.134849	NA	NA	NA
AAACCCAC	GTGGGTTT	5.08829	ACAAAAACCCACGTCG	CGACGTGGGTTTTTGT	NA	CGCAAAACCCACCATA	TATGGTGGGTTTTGCG	NA	AGTAAAACCCACCATC	GATGGTGGGTTTTACT	NA	GCATAAACCCACACTT	AAGTGTGGGTTTATGC	NA	GCAGAAACCCACAGTA	TACTGTGGGTTTCTGC	NA	GTAAAAACCCACTATA	TATAGTGGGTTTTTAC	NA	GCGAAAACCCACTTCA	TGAAGTGGGTTTTCGC	1.83057	NA	NA	NA	NA	NA	NA
AAACCCAG	CTGGGTTT	3.41817	ACAAAAACCCAGGTCG	CGACCTGGGTTTTTGT	NA	CGCAAAACCCAGCATA	TATGCTGGGTTTTGCG	6.39676	AGTAAAACCCAGCATC	GATGCTGGGTTTTACT	2.93247	GCATAAACCCAGACTT	AAGTCTGGGTTTATGC	4.91139	GCAGAAACCCAGAGTA	TACTCTGGGTTTCTGC	NA	GTAAAAACCCAGTATA	TATACTGGGTTTTTAC	NA	GCGAAAACCCAGTTCA	TGAACTGGGTTTTCGC	-0.549353	NA	1.25592	0.275379	0.71177	NA	NA
AAACCCAT	ATGGGTTT	3.79506	ACAAAAACCCATGTCG	CGACATGGGTTTTTGT	NA	CGCAAAACCCATCATA	TATGATGGGTTTTGCG	NA	AGTAAAACCCATCATC	GATGATGGGTTTTACT	2.61566	GCATAAACCCATACTT	AAGTATGGGTTTATGC	4.93523	GCAGAAACCCATAGTA	TACTATGGGTTTCTGC	NA	GTAAAAACCCATTATA	TATAATGGGTTTTTAC	NA	GCGAAAACCCATTTCA	TGAAATGGGTTTTCGC	-0.0122867	NA	NA	-0.044674	0.731648	NA	NA
AAACCCCA	TGGGGTTT	5.11311	ACAAAAACCCCAGTCG	CGACTGGGGTTTTTGT	NA	CGCAAAACCCCACATA	TATGTGGGGTTTTGCG	5.81095	AGTAAAACCCCACATC	GATGTGGGGTTTTACT	NA	GCATAAACCCCAACTT	AAGTTGGGGTTTATGC	NA	GCAGAAACCCCAAGTA	TACTTGGGGTTTCTGC	NA	GTAAAAACCCCATATA	TATATGGGGTTTTTAC	NA	GCGAAAACCCCATTCA	TGAATGGGGTTTTCGC	1.86594	NA	0.566193	NA	NA	NA	NA
AAACCCCC	GGGGGTTT	4.50415	ACAAAAACCCCCGTCG	CGACGGGGGTTTTTGT	NA	CGCAAAACCCCCCATA	TATGGGGGGTTTTGCG	4.98144	AGTAAAACCCCCCATC	GATGGGGGGTTTTACT	3.25099	GCATAAACCCCCACTT	AAGTGGGGGTTTATGC	NA	GCAGAAACCCCCAGTA	TACTGGGGGTTTCTGC	NA	GTAAAAACCCCCTATA	TATAGGGGGTTTTTAC	NA	GCGAAAACCCCCTTCA	TGAAGGGGGTTTTCGC	0.998168	NA	-0.41047	0.597153	NA	NA	NA
AAACCCCG	CGGGGTTT	4.44151	ACAAAAACCCCGGTCG	CGACCGGGGTTTTTGT	NA	CGCAAAACCCCGCATA	TATGCGGGGTTTTGCG	5.82107	AGTAAAACCCCGCATC	GATGCGGGGTTTTACT	NA	GCATAAACCCCGACTT	AAGTCGGGGTTTATGC	4.18685	GCAGAAACCCCGAGTA	TACTCGGGGTTTCTGC	NA	GTAAAAACCCCGTATA	TATACGGGGTTTTTAC	NA	GCGAAAACCCCGTTCA	TGAACGGGGTTTTCGC	0.908901	NA	0.578098	NA	0.107786	NA	NA
AAACCCCT	AGGGGTTT	4.07756	ACAAAAACCCCTGTCG	CGACAGGGGTTTTTGT	NA	CGCAAAACCCCTCATA	TATGAGGGGTTTTGCG	5.40631	AGTAAAACCCCTCATC	GATGAGGGGTTTTACT	1.1035	GCATAAACCCCTACTT	AAGTAGGGGTTTATGC	4.32075	GCAGAAACCCCTAGTA	TACTAGGGGTTTCTGC	NA	GTAAAAACCCCTTATA	TATAAGGGGTTTTTAC	NA	GCGAAAACCCCTTTCA	TGAAAGGGGTTTTCGC	0.390279	NA	0.0897673	-1.57231	0.219409	NA	NA
AAACCCGA	TCGGGTTT	2.64908	ACAAAAACCCGAGTCG	CGACTCGGGTTTTTGT	NA	CGCAAAACCCGACATA	TATGTCGGGTTTTGCG	5.8387	AGTAAAACCCGACATC	GATGTCGGGTTTTACT	1.79209	GCATAAACCCGAACTT	AAGTTCGGGTTTATGC	NA	GCAGAAACCCGAAGTA	TACTTCGGGTTTCTGC	NA	GTAAAAACCCGATATA	TATATCGGGTTTTTAC	1.55831	GCGAAAACCCGATTCA	TGAATCGGGTTTTCGC	-1.64531	NA	0.598865	-0.876672	NA	NA	-1.20951
AAACCCGC	GCGGGTTT	4.0797	ACAAAAACCCGCGTCG	CGACGCGGGTTTTTGT	NA	CGCAAAACCCGCCATA	TATGGCGGGTTTTGCG	4.83349	AGTAAAACCCGCCATC	GATGGCGGGTTTTACT	2.3281	GCATAAACCCGCACTT	AAGTGCGGGTTTATGC	NA	GCAGAAACCCGCAGTA	TACTGCGGGTTTCTGC	2.76848	GTAAAAACCCGCTATA	TATAGCGGGTTTTTAC	NA	GCGAAAACCCGCTTCA	TGAAGCGGGTTTTCGC	0.393323	NA	-0.584664	-0.335176	NA	-0.05245	NA
AAACCCGG	CCGGGTTT	3.71558	ACAAAAACCCGGGTCG	CGACCCGGGTTTTTGT	NA	CGCAAAACCCGGCATA	TATGCCGGGTTTTGCG	5.38638	AGTAAAACCCGGCATC	GATGCCGGGTTTTACT	2.05444	GCATAAACCCGGACTT	AAGTCCGGGTTTATGC	4.74163	GCAGAAACCCGGAGTA	TACTCCGGGTTTCTGC	1.65013	GTAAAAACCCGGTATA	TATACCGGGTTTTTAC	NA	GCGAAAACCCGGTTCA	TGAACCGGGTTTTCGC	-0.125551	NA	0.0663	-0.611637	0.570257	-1.09219	NA
AAACCCGT	ACGGGTTT	3.42883	ACAAAAACCCGTGTCG	CGACACGGGTTTTTGT	4.90867	CGCAAAACCCGTCATA	TATGACGGGTTTTGCG	6.01532	AGTAAAACCCGTCATC	GATGACGGGTTTTACT	2.23752	GCATAAACCCGTACTT	AAGTACGGGTTTATGC	4.42618	GCAGAAACCCGTAGTA	TACTACGGGTTTCTGC	NA	GTAAAAACCCGTTATA	TATAACGGGTTTTTAC	NA	GCGAAAACCCGTTTCA	TGAAACGGGTTTTCGC	-0.534166	0.0381614	0.806811	-0.426691	0.307296	NA	NA
AAACCCTA	TAGGGTTT	2.63392	ACAAAAACCCTAGTCG	CGACTAGGGTTTTTGT	NA	CGCAAAACCCTACATA	TATGTAGGGTTTTGCG	5.19728	AGTAAAACCCTACATC	GATGTAGGGTTTTACT	1.99362	GCATAAACCCTAACTT	AAGTTAGGGTTTATGC	NA	GCAGAAACCCTAAGTA	TACTTAGGGTTTCTGC	NA	GTAAAAACCCTATATA	TATATAGGGTTTTTAC	NA	GCGAAAACCCTATTCA	TGAATAGGGTTTTCGC	-1.66692	NA	-0.156334	-0.673086	NA	NA	NA
AAACCCTC	GAGGGTTT	3.6237	ACAAAAACCCTCGTCG	CGACGAGGGTTTTTGT	NA	CGCAAAACCCTCCATA	TATGGAGGGTTTTGCG	5.27968	AGTAAAACCCTCCATC	GATGGAGGGTTTTACT	2.32852	GCATAAACCCTCACTT	AAGTGAGGGTTTATGC	5.30173	GCAGAAACCCTCAGTA	TACTGAGGGTTTCTGC	NA	GTAAAAACCCTCTATA	TATAGAGGGTTTTTAC	NA	GCGAAAACCCTCTTCA	TGAAGAGGGTTTTCGC	-0.256477	NA	-0.0593207	-0.33476	1.03717	NA	NA
AAACCCTG	CAGGGTTT	3.87094	ACAAAAACCCTGGTCG	CGACCAGGGTTTTTGT	NA	CGCAAAACCCTGCATA	TATGCAGGGTTTTGCG	5.26658	AGTAAAACCCTGCATC	GATGCAGGGTTTTACT	2.37244	GCATAAACCCTGACTT	AAGTCAGGGTTTATGC	5.17921	GCAGAAACCCTGAGTA	TACTCAGGGTTTCTGC	2.80345	GTAAAAACCCTGTATA	TATACAGGGTTTTTAC	NA	GCGAAAACCCTGTTCA	TGAACAGGGTTTTCGC	0.0958395	NA	-0.0747401	-0.290391	0.935032	-0.0199412	NA
AAACCCTT	AAGGGTTT	3.96533	ACAAAAACCCTTGTCG	CGACAAGGGTTTTTGT	NA	CGCAAAACCCTTCATA	TATGAAGGGTTTTGCG	5.55782	AGTAAAACCCTTCATC	GATGAAGGGTTTTACT	3.19071	GCATAAACCCTTACTT	AAGTAAGGGTTTATGC	4.47548	GCAGAAACCCTTAGTA	TACTAAGGGTTTCTGC	NA	GTAAAAACCCTTTATA	TATAAAGGGTTTTTAC	NA	GCGAAAACCCTTTTCA	TGAAAAGGGTTTTCGC	0.230349	NA	0.26816	0.536261	0.348393	NA	NA
AAACCGAA	TTCGGTTT	3.8449	ACAAAAACCGAAGTCG	CGACTTCGGTTTTTGT	NA	CGCAAAACCGAACATA	TATGTTCGGTTTTGCG	NA	AGTAAAACCGAACATC	GATGTTCGGTTTTACT	2.52492	GCATAAACCGAAACTT	AAGTTTCGGTTTATGC	3.5621	GCAGAAACCGAAAGTA	TACTTTCGGTTTCTGC	2.3082	GTAAAAACCGAATATA	TATATTCGGTTTTTAC	NA	GCGAAAACCGAATTCA	TGAATTCGGTTTTCGC	0.0587378	NA	NA	-0.136349	-0.413015	-0.480379	NA
AAACCGAC	GTCGGTTT	3.62959	ACAAAAACCGACGTCG	CGACGTCGGTTTTTGT	NA	CGCAAAACCGACCATA	TATGGTCGGTTTTGCG	4.72989	AGTAAAACCGACCATC	GATGGTCGGTTTTACT	3.4125	GCATAAACCGACACTT	AAGTGTCGGTTTATGC	NA	GCAGAAACCGACAGTA	TACTGTCGGTTTCTGC	NA	GTAAAAACCGACTATA	TATAGTCGGTTTTTAC	NA	GCGAAAACCGACTTCA	TGAAGTCGGTTTTCGC	-0.248079	NA	-0.706639	0.760318	NA	NA	NA
AAACCGAG	CTCGGTTT	3.88586	ACAAAAACCGAGGTCG	CGACCTCGGTTTTTGT	NA	CGCAAAACCGAGCATA	TATGCTCGGTTTTGCG	5.41068	AGTAAAACCGAGCATC	GATGCTCGGTTTTACT	2.81748	GCATAAACCGAGACTT	AAGTCTCGGTTTATGC	5.53814	GCAGAAACCGAGAGTA	TACTCTCGGTTTCTGC	3.52157	GTAAAAACCGAGTATA	TATACTCGGTTTTTAC	NA	GCGAAAACCGAGTTCA	TGAACTCGGTTTTCGC	0.117097	NA	0.0949154	0.159208	1.23425	0.647703	NA
AAACCGAT	ATCGGTTT	4.17177	ACAAAAACCGATGTCG	CGACATCGGTTTTTGT	NA	CGCAAAACCGATCATA	TATGATCGGTTTTGCG	5.22889	AGTAAAACCGATCATC	GATGATCGGTTTTACT	2.00619	GCATAAACCGATACTT	AAGTATCGGTTTATGC	4.54075	GCAGAAACCGATAGTA	TACTATCGGTTTCTGC	NA	GTAAAAACCGATTATA	TATAATCGGTTTTTAC	NA	GCGAAAACCGATTTCA	TGAAATCGGTTTTCGC	0.524522	NA	-0.119124	-0.660382	0.402807	NA	NA
AAACCGCA	TGCGGTTT	3.37486	ACAAAAACCGCAGTCG	CGACTGCGGTTTTTGT	NA	CGCAAAACCGCACATA	TATGTGCGGTTTTGCG	4.78394	AGTAAAACCGCACATC	GATGTGCGGTTTTACT	NA	GCATAAACCGCAACTT	AAGTTGCGGTTTATGC	NA	GCAGAAACCGCAAGTA	TACTTGCGGTTTCTGC	4.11096	GTAAAAACCGCATATA	TATATGCGGTTTTTAC	NA	GCGAAAACCGCATTCA	TGAATGCGGTTTTCGC	-0.611077	NA	-0.642995	NA	NA	1.19566	NA
AAACCGCC	GGCGGTTT	3.97799	ACAAAAACCGCCGTCG	CGACGGCGGTTTTTGT	NA	CGCAAAACCGCCCATA	TATGGGCGGTTTTGCG	6.1754	AGTAAAACCGCCCATC	GATGGGCGGTTTTACT	2.0891	GCATAAACCGCCACTT	AAGTGGCGGTTTATGC	NA	GCAGAAACCGCCAGTA	TACTGGCGGTTTCTGC	NA	GTAAAAACCGCCTATA	TATAGGCGGTTTTTAC	NA	GCGAAAACCGCCTTCA	TGAAGGCGGTTTTCGC	0.248391	NA	0.995281	-0.576631	NA	NA	NA
AAACCGCG	CGCGGTTT	4.40601	ACAAAAACCGCGGTCG	CGACCGCGGTTTTTGT	NA	CGCAAAACCGCGCATA	TATGCGCGGTTTTGCG	5.81542	AGTAAAACCGCGCATC	GATGCGCGGTTTTACT	3.04134	GCATAAACCGCGACTT	AAGTCGCGGTTTATGC	4.78825	GCAGAAACCGCGAGTA	TACTCGCGGTTTCTGC	4.29636	GTAAAAACCGCGTATA	TATACGCGGTTTTTAC	NA	GCGAAAACCGCGTTCA	TGAACGCGGTTTTCGC	0.858319	NA	0.571451	0.385361	0.609122	1.36803	NA
AAACCGCT	AGCGGTTT	4.32698	ACAAAAACCGCTGTCG	CGACAGCGGTTTTTGT	3.80179	CGCAAAACCGCTCATA	TATGAGCGGTTTTGCG	5.24071	AGTAAAACCGCTCATC	GATGAGCGGTTTTACT	2.09619	GCATAAACCGCTACTT	AAGTAGCGGTTTATGC	NA	GCAGAAACCGCTAGTA	TACTAGCGGTTTCTGC	2.95271	GTAAAAACCGCTTATA	TATAAGCGGTTTTTAC	NA	GCGAAAACCGCTTTCA	TGAAAGCGGTTTTCGC	0.745702	-1.43658	-0.1052	-0.569464	NA	0.118824	NA
AAACCGGA	TCCGGTTT	3.10099	ACAAAAACCGGAGTCG	CGACTCCGGTTTTTGT	NA	CGCAAAACCGGACATA	TATGTCCGGTTTTGCG	6.11069	AGTAAAACCGGACATC	GATGTCCGGTTTTACT	3.2289	GCATAAACCGGAACTT	AAGTTCCGGTTTATGC	7.62553	GCAGAAACCGGAAGTA	TACTTCCGGTTTCTGC	7.21422	GTAAAAACCGGATATA	TATATCCGGTTTTTAC	NA	GCGAAAACCGGATTCA	TGAATCCGGTTTTCGC	-1.00133	NA	0.919094	0.574834	2.97432	4.08079	NA
AAACCGGC	GCCGGTTT	4.0859	ACAAAAACCGGCGTCG	CGACGCCGGTTTTTGT	NA	CGCAAAACCGGCCATA	TATGGCCGGTTTTGCG	5.78802	AGTAAAACCGGCCATC	GATGGCCGGTTTTACT	1.74329	GCATAAACCGGCACTT	AAGTGCCGGTTTATGC	NA	GCAGAAACCGGCAGTA	TACTGCCGGTTTCTGC	2.19503	GTAAAAACCGGCTATA	TATAGCCGGTTTTTAC	2.22198	GCGAAAACCGGCTTCA	TGAAGCCGGTTTTCGC	0.402154	NA	0.539186	-0.925977	NA	-0.585596	-0.520634
AAACCGGG	CCCGGTTT	4.31802	ACAAAAACCGGGGTCG	CGACCCCGGTTTTTGT	4.70017	CGCAAAACCGGGCATA	TATGCCCGGTTTTGCG	5.84499	AGTAAAACCGGGCATC	GATGCCCGGTTTTACT	2.08834	GCATAAACCGGGACTT	AAGTCCCGGTTTATGC	4.78075	GCAGAAACCGGGAGTA	TACTCCCGGTTTCTGC	3.24158	GTAAAAACCGGGTATA	TATACCCGGTTTTTAC	1.0981	GCGAAAACCGGGTTCA	TGAACCCGGTTTTCGC	0.732923	-0.239631	0.606271	-0.577396	0.602868	0.387392	-1.68719
AAACCGGT	ACCGGTTT	3.36864	ACAAAAACCGGTGTCG	CGACACCGGTTTTTGT	4.81644	CGCAAAACCGGTCATA	TATGACCGGTTTTGCG	5.99682	AGTAAAACCGGTCATC	GATGACCGGTTTTACT	1.95991	GCATAAACCGGTACTT	AAGTACCGGTTTATGC	3.29546	GCAGAAACCGGTAGTA	TACTACCGGTTTCTGC	1.35109	GTAAAAACCGGTTATA	TATAACCGGTTTTTAC	0.509311	GCGAAAACCGGTTTCA	TGAAACCGGTTTTCGC	-0.619938	-0.0847155	0.785023	-0.707138	-0.635287	-1.37021	-2.29835
AAACCGTA	TACGGTTT	2.69192	ACAAAAACCGTAGTCG	CGACTACGGTTTTTGT	NA	CGCAAAACCGTACATA	TATGTACGGTTTTGCG	5.71296	AGTAAAACCGTACATC	GATGTACGGTTTTACT	NA	GCATAAACCGTAACTT	AAGTTACGGTTTATGC	3.9454	GCAGAAACCGTAAGTA	TACTTACGGTTTCTGC	3.78438	GTAAAAACCGTATATA	TATATACGGTTTTTAC	NA	GCGAAAACCGTATTCA	TGAATACGGTTTTCGC	-1.58425	NA	0.450816	NA	-0.093488	0.892034	NA
AAACCGTC	GACGGTTT	3.94815	ACAAAAACCGTCGTCG	CGACGACGGTTTTTGT	NA	CGCAAAACCGTCCATA	TATGGACGGTTTTGCG	4.8421	AGTAAAACCGTCCATC	GATGGACGGTTTTACT	2.43328	GCATAAACCGTCACTT	AAGTGACGGTTTATGC	3.66004	GCAGAAACCGTCAGTA	TACTGACGGTTTCTGC	2.69086	GTAAAAACCGTCTATA	TATAGACGGTTTTTAC	NA	GCGAAAACCGTCTTCA	TGAAGACGGTTTTCGC	0.205867	NA	-0.574523	-0.228921	-0.331367	-0.12462	NA
AAACCGTG	CACGGTTT	3.85119	ACAAAAACCGTGGTCG	CGACCACGGTTTTTGT	5.18876	CGCAAAACCGTGCATA	TATGCACGGTTTTGCG	4.91267	AGTAAAACCGTGCATC	GATGCACGGTTTTACT	1.44296	GCATAAACCGTGACTT	AAGTCACGGTTTATGC	4.01357	GCAGAAACCGTGAGTA	TACTCACGGTTTCTGC	2.67177	GTAAAAACCGTGTATA	TATACACGGTTTTTAC	2.40747	GCGAAAACCGTGTTCA	TGAACACGGTTTTCGC	0.0676953	0.411343	-0.491434	-1.22938	-0.0366611	-0.142367	-0.328094
AAACCGTT	AACGGTTT	4.09254	ACAAAAACCGTTGTCG	CGACAACGGTTTTTGT	4.81045	CGCAAAACCGTTCATA	TATGAACGGTTTTGCG	5.4128	AGTAAAACCGTTCATC	GATGAACGGTTTTACT	2.6239	GCATAAACCGTTACTT	AAGTAACGGTTTATGC	1.1479	GCAGAAACCGTTAGTA	TACTAACGGTTTCTGC	NA	GTAAAAACCGTTTATA	TATAAACGGTTTTTAC	1.37957	GCGAAAACCGTTTTCA	TGAAAACGGTTTTCGC	0.411617	-0.0927043	0.0974069	-0.0363532	-2.42553	NA	-1.39503
AAACCTAA	TTAGGTTT	4.77603	ACAAAAACCTAAGTCG	CGACTTAGGTTTTTGT	NA	CGCAAAACCTAACATA	TATGTTAGGTTTTGCG	5.08215	AGTAAAACCTAACATC	GATGTTAGGTTTTACT	NA	GCATAAACCTAAACTT	AAGTTTAGGTTTATGC	3.83168	GCAGAAACCTAAAGTA	TACTTTAGGTTTCTGC	NA	GTAAAAACCTAATATA	TATATTAGGTTTTTAC	NA	GCGAAAACCTAATTCA	TGAATTAGGTTTTCGC	1.38559	NA	-0.291885	NA	-0.18829	NA	NA
AAACCTAC	GTAGGTTT	4.24927	ACAAAAACCTACGTCG	CGACGTAGGTTTTTGT	NA	CGCAAAACCTACCATA	TATGGTAGGTTTTGCG	4.40921	AGTAAAACCTACCATC	GATGGTAGGTTTTACT	NA	GCATAAACCTACACTT	AAGTGTAGGTTTATGC	4.68494	GCAGAAACCTACAGTA	TACTGTAGGTTTCTGC	NA	GTAAAAACCTACTATA	TATAGTAGGTTTTTAC	NA	GCGAAAACCTACTTCA	TGAAGTAGGTTTTCGC	0.634965	NA	-1.0842	NA	0.523	NA	NA
AAACCTAG	CTAGGTTT	3.55098	ACAAAAACCTAGGTCG	CGACCTAGGTTTTTGT	NA	CGCAAAACCTAGCATA	TATGCTAGGTTTTGCG	5.32963	AGTAAAACCTAGCATC	GATGCTAGGTTTTACT	NA	GCATAAACCTAGACTT	AAGTCTAGGTTTATGC	4.21859	GCAGAAACCTAGAGTA	TACTCTAGGTTTCTGC	2.80972	GTAAAAACCTAGTATA	TATACTAGGTTTTTAC	NA	GCGAAAACCTAGTTCA	TGAACTAGGTTTTCGC	-0.360096	NA	-0.00051475	NA	0.134245	-0.0141086	NA
AAACCTAT	ATAGGTTT	4.48793	ACAAAAACCTATGTCG	CGACATAGGTTTTTGT	NA	CGCAAAACCTATCATA	TATGATAGGTTTTGCG	4.58827	AGTAAAACCTATCATC	GATGATAGGTTTTACT	1.68395	GCATAAACCTATACTT	AAGTATAGGTTTATGC	NA	GCAGAAACCTATAGTA	TACTATAGGTTTCTGC	NA	GTAAAAACCTATTATA	TATAATAGGTTTTTAC	NA	GCGAAAACCTATTTCA	TGAAATAGGTTTTCGC	0.975045	NA	-0.873379	-0.985924	NA	NA	NA
AAACCTCA	TGAGGTTT	4.84296	ACAAAAACCTCAGTCG	CGACTGAGGTTTTTGT	4.52973	CGCAAAACCTCACATA	TATGTGAGGTTTTGCG	5.50806	AGTAAAACCTCACATC	GATGTGAGGTTTTACT	1.27555	GCATAAACCTCAACTT	AAGTTGAGGTTTATGC	3.95915	GCAGAAACCTCAAGTA	TACTTGAGGTTTCTGC	NA	GTAAAAACCTCATATA	TATATGAGGTTTTTAC	NA	GCGAAAACCTCATTCA	TGAATGAGGTTTTCGC	1.48097	-0.466721	0.209575	-1.39851	-0.0820289	NA	NA
AAACCTCC	GGAGGTTT	3.59946	ACAAAAACCTCCGTCG	CGACGGAGGTTTTTGT	NA	CGCAAAACCTCCCATA	TATGGGAGGTTTTGCG	5.09765	AGTAAAACCTCCCATC	GATGGGAGGTTTTACT	2.69114	GCATAAACCTCCACTT	AAGTGGAGGTTTATGC	4.32882	GCAGAAACCTCCAGTA	TACTGGAGGTTTCTGC	NA	GTAAAAACCTCCTATA	TATAGGAGGTTTTTAC	NA	GCGAAAACCTCCTTCA	TGAAGGAGGTTTTCGC	-0.291021	NA	-0.273641	0.0315754	0.226132	NA	NA
AAACCTCG	CGAGGTTT	4.64687	ACAAAAACCTCGGTCG	CGACCGAGGTTTTTGT	5.85984	CGCAAAACCTCGCATA	TATGCGAGGTTTTGCG	6.36896	AGTAAAACCTCGCATC	GATGCGAGGTTTTACT	2.64543	GCATAAACCTCGACTT	AAGTCGAGGTTTATGC	4.78013	GCAGAAACCTCGAGTA	TACTCGAGGTTTCTGC	3.99344	GTAAAAACCTCGTATA	TATACGAGGTTTTTAC	NA	GCGAAAACCTCGTTCA	TGAACGAGGTTTTCGC	1.20154	1.30546	1.22318	-0.0146071	0.602358	1.0864	NA
AAACCTCT	AGAGGTTT	3.69772	ACAAAAACCTCTGTCG	CGACAGAGGTTTTTGT	NA	CGCAAAACCTCTCATA	TATGAGAGGTTTTGCG	5.69204	AGTAAAACCTCTCATC	GATGAGAGGTTTTACT	1.68645	GCATAAACCTCTACTT	AAGTAGAGGTTTATGC	4.61303	GCAGAAACCTCTAGTA	TACTAGAGGTTTCTGC	NA	GTAAAAACCTCTTATA	TATAAGAGGTTTTTAC	NA	GCGAAAACCTCTTTCA	TGAAAGAGGTTTTCGC	-0.150992	NA	0.426182	-0.983394	0.463054	NA	NA
AAACCTGA	TCAGGTTT	2.8951	ACAAAAACCTGAGTCG	CGACTCAGGTTTTTGT	4.44867	CGCAAAACCTGACATA	TATGTCAGGTTTTGCG	4.77247	AGTAAAACCTGACATC	GATGTCAGGTTTTACT	NA	GCATAAACCTGAACTT	AAGTTCAGGTTTATGC	2.94877	GCAGAAACCTGAAGTA	TACTTCAGGTTTCTGC	3.68722	GTAAAAACCTGATATA	TATATCAGGTTTTTAC	NA	GCGAAAACCTGATTCA	TGAATCAGGTTTTCGC	-1.29473	-0.574722	-0.656505	NA	-0.924294	0.801712	NA
AAACCTGC	GCAGGTTT	3.95752	ACAAAAACCTGCGTCG	CGACGCAGGTTTTTGT	NA	CGCAAAACCTGCCATA	TATGGCAGGTTTTGCG	4.51447	AGTAAAACCTGCCATC	GATGGCAGGTTTTACT	NA	GCATAAACCTGCACTT	AAGTGCAGGTTTATGC	NA	GCAGAAACCTGCAGTA	TACTGCAGGTTTCTGC	NA	GTAAAAACCTGCTATA	TATAGCAGGTTTTTAC	NA	GCGAAAACCTGCTTCA	TGAAGCAGGTTTTCGC	0.219218	NA	-0.960268	NA	NA	NA	NA
AAACCTGG	CCAGGTTT	3.715	ACAAAAACCTGGGTCG	CGACCCAGGTTTTTGT	NA	CGCAAAACCTGGCATA	TATGCCAGGTTTTGCG	4.87738	AGTAAAACCTGGCATC	GATGCCAGGTTTTACT	1.24137	GCATAAACCTGGACTT	AAGTCCAGGTTTATGC	3.20251	GCAGAAACCTGGAGTA	TACTCCAGGTTTCTGC	1.83638	GTAAAAACCTGGTATA	TATACCAGGTTTTTAC	2.09395	GCGAAAACCTGGTTCA	TGAACCAGGTTTTCGC	-0.126366	NA	-0.532987	-1.43303	-0.712769	-0.919035	-0.653528
AAACCTGT	ACAGGTTT	3.71189	ACAAAAACCTGTGTCG	CGACACAGGTTTTTGT	3.81277	CGCAAAACCTGTCATA	TATGACAGGTTTTGCG	4.08302	AGTAAAACCTGTCATC	GATGACAGGTTTTACT	1.06256	GCATAAACCTGTACTT	AAGTACAGGTTTATGC	2.31233	GCAGAAACCTGTAGTA	TACTACAGGTTTCTGC	3.26861	GTAAAAACCTGTTATA	TATAACAGGTTTTTAC	2.21434	GCGAAAACCTGTTTCA	TGAAACAGGTTTTCGC	-0.130799	-1.42196	-1.46825	-1.61367	-1.45484	0.412523	-0.528567
AAACCTTA	TAAGGTTT	4.55555	ACAAAAACCTTAGTCG	CGACTAAGGTTTTTGT	3.47403	CGCAAAACCTTACATA	TATGTAAGGTTTTGCG	5.05204	AGTAAAACCTTACATC	GATGTAAGGTTTTACT	1.57468	GCATAAACCTTAACTT	AAGTTAAGGTTTATGC	3.55841	GCAGAAACCTTAAGTA	TACTTAAGGTTTCTGC	NA	GTAAAAACCTTATATA	TATATAAGGTTTTTAC	NA	GCGAAAACCTTATTCA	TGAATAAGGTTTTCGC	1.07141	-1.87328	-0.327343	-1.09632	-0.416091	NA	NA
AAACCTTC	GAAGGTTT	3.57283	ACAAAAACCTTCGTCG	CGACGAAGGTTTTTGT	NA	CGCAAAACCTTCCATA	TATGGAAGGTTTTGCG	4.95141	AGTAAAACCTTCCATC	GATGGAAGGTTTTACT	1.26145	GCATAAACCTTCACTT	AAGTGAAGGTTTATGC	4.21152	GCAGAAACCTTCAGTA	TACTGAAGGTTTCTGC	NA	GTAAAAACCTTCTATA	TATAGAAGGTTTTTAC	NA	GCGAAAACCTTCTTCA	TGAAGAAGGTTTTCGC	-0.328967	NA	-0.445821	-1.41274	0.128349	NA	NA
AAACCTTG	CAAGGTTT	3.05472	ACAAAAACCTTGGTCG	CGACCAAGGTTTTTGT	NA	CGCAAAACCTTGCATA	TATGCAAGGTTTTGCG	5.11585	AGTAAAACCTTGCATC	GATGCAAGGTTTTACT	1.80228	GCATAAACCTTGACTT	AAGTCAAGGTTTATGC	4.88633	GCAGAAACCTTGAGTA	TACTCAAGGTTTCTGC	2.90865	GTAAAAACCTTGTATA	TATACAAGGTTTTTAC	1.39753	GCGAAAACCTTGTTCA	TGAACAAGGTTTTCGC	-1.06727	NA	-0.25221	-0.866382	0.690886	0.0778676	-1.37639
AAACCTTT	AAAGGTTT	4.06217	ACAAAAACCTTTGTCG	CGACAAAGGTTTTTGT	4.04197	CGCAAAACCTTTCATA	TATGAAAGGTTTTGCG	4.60452	AGTAAAACCTTTCATC	GATGAAAGGTTTTACT	1.80657	GCATAAACCTTTACTT	AAGTAAAGGTTTATGC	4.20665	GCAGAAACCTTTAGTA	TACTAAAGGTTTCTGC	3.50427	GTAAAAACCTTTTATA	TATAAAAGGTTTTTAC	NA	GCGAAAACCTTTTTCA	TGAAAAAGGTTTTCGC	0.368348	-1.11658	-0.854246	-0.862053	0.124295	0.631618	NA
AAACGAAA	TTTCGTTT	3.95214	ACAAAAACGAAAGTCG	CGACTTTCGTTTTTGT	NA	CGCAAAACGAAACATA	TATGTTTCGTTTTGCG	6.41046	AGTAAAACGAAACATC	GATGTTTCGTTTTACT	2.323	GCATAAACGAAAACTT	AAGTTTTCGTTTATGC	NA	GCAGAAACGAAAAGTA	TACTTTTCGTTTCTGC	NA	GTAAAAACGAAATATA	TATATTTCGTTTTTAC	NA	GCGAAAACGAAATTCA	TGAATTTCGTTTTCGC	0.211553	NA	1.27204	-0.340329	NA	NA	NA
AAACGAAC	GTTCGTTT	4.9024	ACAAAAACGAACGTCG	CGACGTTCGTTTTTGT	NA	CGCAAAACGAACCATA	TATGGTTCGTTTTGCG	6.14601	AGTAAAACGAACCATC	GATGGTTCGTTTTACT	3.08653	GCATAAACGAACACTT	AAGTGTTCGTTTATGC	4.27452	GCAGAAACGAACAGTA	TACTGTTCGTTTCTGC	2.73217	GTAAAAACGAACTATA	TATAGTTCGTTTTTAC	1.75827	GCGAAAACGAACTTCA	TGAAGTTCGTTTTCGC	1.56567	NA	0.96068	0.431016	0.180869	-0.0862075	-1.00196
AAACGAAG	CTTCGTTT	4.34268	ACAAAAACGAAGGTCG	CGACCTTCGTTTTTGT	NA	CGCAAAACGAAGCATA	TATGCTTCGTTTTGCG	5.79817	AGTAAAACGAAGCATC	GATGCTTCGTTTTACT	1.20875	GCATAAACGAAGACTT	AAGTCTTCGTTTATGC	NA	GCAGAAACGAAGAGTA	TACTCTTCGTTTCTGC	2.57292	GTAAAAACGAAGTATA	TATACTTCGTTTTTAC	NA	GCGAAAACGAAGTTCA	TGAACTTCGTTTTCGC	0.768076	NA	0.551139	-1.46598	NA	-0.234262	NA
AAACGAAT	ATTCGTTT	4.36705	ACAAAAACGAATGTCG	CGACATTCGTTTTTGT	NA	CGCAAAACGAATCATA	TATGATTCGTTTTGCG	5.48535	AGTAAAACGAATCATC	GATGATTCGTTTTACT	2.15713	GCATAAACGAATACTT	AAGTATTCGTTTATGC	3.76638	GCAGAAACGAATAGTA	TACTATTCGTTTCTGC	3.41443	GTAAAAACGAATTATA	TATAATTCGTTTTTAC	NA	GCGAAAACGAATTTCA	TGAAATTCGTTTTCGC	0.802805	NA	0.182833	-0.507902	-0.242725	0.548093	NA
AAACGACA	TGTCGTTT	3.74036	ACAAAAACGACAGTCG	CGACTGTCGTTTTTGT	NA	CGCAAAACGACACATA	TATGTGTCGTTTTGCG	5.52259	AGTAAAACGACACATC	GATGTGTCGTTTTACT	2.82654	GCATAAACGACAACTT	AAGTTGTCGTTTATGC	NA	GCAGAAACGACAAGTA	TACTTGTCGTTTCTGC	NA	GTAAAAACGACATATA	TATATGTCGTTTTTAC	NA	GCGAAAACGACATTCA	TGAATGTCGTTTTCGC	-0.0902372	NA	0.226681	0.168357	NA	NA	NA
AAACGACC	GGTCGTTT	4.33958	ACAAAAACGACCGTCG	CGACGGTCGTTTTTGT	NA	CGCAAAACGACCCATA	TATGGGTCGTTTTGCG	NA	AGTAAAACGACCCATC	GATGGGTCGTTTTACT	2.45565	GCATAAACGACCACTT	AAGTGGTCGTTTATGC	NA	GCAGAAACGACCAGTA	TACTGGTCGTTTCTGC	NA	GTAAAAACGACCTATA	TATAGGTCGTTTTTAC	NA	GCGAAAACGACCTTCA	TGAAGGTCGTTTTCGC	0.763652	NA	NA	-0.206327	NA	NA	NA
AAACGACG	CGTCGTTT	4.05359	ACAAAAACGACGGTCG	CGACCGTCGTTTTTGT	NA	CGCAAAACGACGCATA	TATGCGTCGTTTTGCG	5.31914	AGTAAAACGACGCATC	GATGCGTCGTTTTACT	NA	GCATAAACGACGACTT	AAGTCGTCGTTTATGC	NA	GCAGAAACGACGAGTA	TACTCGTCGTTTCTGC	3.76643	GTAAAAACGACGTATA	TATACGTCGTTTTTAC	NA	GCGAAAACGACGTTCA	TGAACGTCGTTTTCGC	0.356112	NA	-0.0128592	NA	NA	0.875346	NA
AAACGACT	AGTCGTTT	4.34994	ACAAAAACGACTGTCG	CGACAGTCGTTTTTGT	NA	CGCAAAACGACTCATA	TATGAGTCGTTTTGCG	5.2081	AGTAAAACGACTCATC	GATGAGTCGTTTTACT	2.56102	GCATAAACGACTACTT	AAGTAGTCGTTTATGC	5.11587	GCAGAAACGACTAGTA	TACTAGTCGTTTCTGC	4.31266	GTAAAAACGACTTATA	TATAAGTCGTTTTTAC	NA	GCGAAAACGACTTTCA	TGAAAGTCGTTTTCGC	0.778412	NA	-0.143594	-0.0998721	0.882235	1.38318	NA
AAACGAGA	TCTCGTTT	4.39094	ACAAAAACGAGAGTCG	CGACTCTCGTTTTTGT	NA	CGCAAAACGAGACATA	TATGTCTCGTTTTGCG	6.00479	AGTAAAACGAGACATC	GATGTCTCGTTTTACT	2.77847	GCATAAACGAGAACTT	AAGTTCTCGTTTATGC	5.24951	GCAGAAACGAGAAGTA	TACTTCTCGTTTCTGC	NA	GTAAAAACGAGATATA	TATATCTCGTTTTTAC	NA	GCGAAAACGAGATTCA	TGAATCTCGTTTTCGC	0.836848	NA	0.794417	0.119802	0.993632	NA	NA
AAACGAGC	GCTCGTTT	4.4198	ACAAAAACGAGCGTCG	CGACGCTCGTTTTTGT	NA	CGCAAAACGAGCCATA	TATGGCTCGTTTTGCG	5.79302	AGTAAAACGAGCCATC	GATGGCTCGTTTTACT	NA	GCATAAACGAGCACTT	AAGTGCTCGTTTATGC	4.35241	GCAGAAACGAGCAGTA	TACTGCTCGTTTCTGC	NA	GTAAAAACGAGCTATA	TATAGCTCGTTTTTAC	NA	GCGAAAACGAGCTTCA	TGAAGCTCGTTTTCGC	0.877969	NA	0.54508	NA	0.245799	NA	NA
AAACGAGG	CCTCGTTT	4.22683	ACAAAAACGAGGGTCG	CGACCCTCGTTTTTGT	NA	CGCAAAACGAGGCATA	TATGCCTCGTTTTGCG	5.48518	AGTAAAACGAGGCATC	GATGCCTCGTTTTACT	0.89325	GCATAAACGAGGACTT	AAGTCCTCGTTTATGC	4.69871	GCAGAAACGAGGAGTA	TACTCCTCGTTTCTGC	1.69565	GTAAAAACGAGGTATA	TATACCTCGTTTTTAC	NA	GCGAAAACGAGGTTCA	TGAACCTCGTTTTCGC	0.60298	NA	0.182628	-1.78472	0.534479	-1.04987	NA
AAACGAGT	ACTCGTTT	3.81314	ACAAAAACGAGTGTCG	CGACACTCGTTTTTGT	NA	CGCAAAACGAGTCATA	TATGACTCGTTTTGCG	5.41515	AGTAAAACGAGTCATC	GATGACTCGTTTTACT	1.88603	GCATAAACGAGTACTT	AAGTACTCGTTTATGC	4.12145	GCAGAAACGAGTAGTA	TACTACTCGTTTCTGC	2.24603	GTAAAAACGAGTTATA	TATAACTCGTTTTTAC	1.55635	GCGAAAACGAGTTTCA	TGAAACTCGTTTTCGC	0.0134801	NA	0.100177	-0.781771	0.0532682	-0.538178	-1.21154
AAACGATA	TATCGTTT	4.38969	ACAAAAACGATAGTCG	CGACTATCGTTTTTGT	NA	CGCAAAACGATACATA	TATGTATCGTTTTGCG	4.96408	AGTAAAACGATACATC	GATGTATCGTTTTACT	3.54545	GCATAAACGATAACTT	AAGTTATCGTTTATGC	7.10647	GCAGAAACGATAAGTA	TACTTATCGTTTCTGC	NA	GTAAAAACGATATATA	TATATATCGTTTTTAC	2.50219	GCGAAAACGATATTCA	TGAATATCGTTTTCGC	0.835055	NA	-0.4309	0.894625	2.54163	NA	-0.229779
AAACGATC	GATCGTTT	4.36589	ACAAAAACGATCGTCG	CGACGATCGTTTTTGT	NA	CGCAAAACGATCCATA	TATGGATCGTTTTGCG	5.67325	AGTAAAACGATCCATC	GATGGATCGTTTTACT	2.06742	GCATAAACGATCACTT	AAGTGATCGTTTATGC	4.73577	GCAGAAACGATCAGTA	TACTGATCGTTTCTGC	3.7852	GTAAAAACGATCTATA	TATAGATCGTTTTTAC	NA	GCGAAAACGATCTTCA	TGAAGATCGTTTTCGC	0.801149	NA	0.404065	-0.598527	0.565378	0.892803	NA
AAACGATG	CATCGTTT	3.90597	ACAAAAACGATGGTCG	CGACCATCGTTTTTGT	NA	CGCAAAACGATGCATA	TATGCATCGTTTTGCG	4.46514	AGTAAAACGATGCATC	GATGCATCGTTTTACT	3.12713	GCATAAACGATGACTT	AAGTCATCGTTTATGC	5.54785	GCAGAAACGATGAGTA	TACTCATCGTTTCTGC	2.99473	GTAAAAACGATGTATA	TATACATCGTTTTTAC	NA	GCGAAAACGATGTTCA	TGAACATCGTTTTCGC	0.145756	NA	-1.01835	0.472029	1.24234	0.157897	NA
AAACGATT	AATCGTTT	3.50179	ACAAAAACGATTGTCG	CGACAATCGTTTTTGT	5.69706	CGCAAAACGATTCATA	TATGAATCGTTTTGCG	5.34814	AGTAAAACGATTCATC	GATGAATCGTTTTACT	NA	GCATAAACGATTACTT	AAGTAATCGTTTATGC	3.95991	GCAGAAACGATTAGTA	TACTAATCGTTTCTGC	2.80074	GTAAAAACGATTTATA	TATAAATCGTTTTTAC	1.6318	GCGAAAACGATTTTCA	TGAAAATCGTTTTCGC	-0.430197	1.08858	0.0212871	NA	-0.0813932	-0.0224604	-1.13323
AAACGCAA	TTGCGTTT	4.40926	ACAAAAACGCAAGTCG	CGACTTGCGTTTTTGT	3.92361	CGCAAAACGCAACATA	TATGTTGCGTTTTGCG	5.98421	AGTAAAACGCAACATC	GATGTTGCGTTTTACT	1.86257	GCATAAACGCAAACTT	AAGTTTGCGTTTATGC	4.33532	GCAGAAACGCAAAGTA	TACTTTGCGTTTCTGC	3.01152	GTAAAAACGCAATATA	TATATTGCGTTTTTAC	NA	GCGAAAACGCAATTCA	TGAATTGCGTTTTCGC	0.862941	-1.27428	0.770186	-0.80547	0.231552	0.173503	NA
AAACGCAC	GTGCGTTT	5.82153	ACAAAAACGCACGTCG	CGACGTGCGTTTTTGT	NA	CGCAAAACGCACCATA	TATGGTGCGTTTTGCG	5.57231	AGTAAAACGCACCATC	GATGGTGCGTTTTACT	2.48169	GCATAAACGCACACTT	AAGTGTGCGTTTATGC	NA	GCAGAAACGCACAGTA	TACTGTGCGTTTCTGC	3.07502	GTAAAAACGCACTATA	TATAGTGCGTTTTTAC	NA	GCGAAAACGCACTTCA	TGAAGTGCGTTTTCGC	2.87543	NA	0.285222	-0.180023	NA	0.232543	NA
AAACGCAG	CTGCGTTT	3.30797	ACAAAAACGCAGGTCG	CGACCTGCGTTTTTGT	4.05715	CGCAAAACGCAGCATA	TATGCTGCGTTTTGCG	5.80735	AGTAAAACGCAGCATC	GATGCTGCGTTTTACT	3.15001	GCATAAACGCAGACTT	AAGTCTGCGTTTATGC	4.39282	GCAGAAACGCAGAGTA	TACTCTGCGTTTCTGC	3.89373	GTAAAAACGCAGTATA	TATACTGCGTTTTTAC	NA	GCGAAAACGCAGTTCA	TGAACTGCGTTTTCGC	-0.706387	-1.09636	0.561953	0.495136	0.279484	0.993703	NA
AAACGCAT	ATGCGTTT	3.64792	ACAAAAACGCATGTCG	CGACATGCGTTTTTGT	4.16191	CGCAAAACGCATCATA	TATGATGCGTTTTGCG	5.20779	AGTAAAACGCATCATC	GATGATGCGTTTTACT	2.32211	GCATAAACGCATACTT	AAGTATGCGTTTATGC	3.66984	GCAGAAACGCATAGTA	TACTATGCGTTTCTGC	2.67993	GTAAAAACGCATTATA	TATAATGCGTTTTTAC	NA	GCGAAAACGCATTTCA	TGAAATGCGTTTTCGC	-0.221957	-0.956785	-0.143966	-0.341236	-0.323197	-0.134781	NA
AAACGCCA	TGGCGTTT	3.6502	ACAAAAACGCCAGTCG	CGACTGGCGTTTTTGT	NA	CGCAAAACGCCACATA	TATGTGGCGTTTTGCG	5.44058	AGTAAAACGCCACATC	GATGTGGCGTTTTACT	NA	GCATAAACGCCAACTT	AAGTTGGCGTTTATGC	NA	GCAGAAACGCCAAGTA	TACTTGGCGTTTCTGC	NA	GTAAAAACGCCATATA	TATATGGCGTTTTTAC	NA	GCGAAAACGCCATTCA	TGAATGGCGTTTTCGC	-0.21871	NA	0.130124	NA	NA	NA	NA
AAACGCCC	GGGCGTTT	3.35893	ACAAAAACGCCCGTCG	CGACGGGCGTTTTTGT	NA	CGCAAAACGCCCCATA	TATGGGGCGTTTTGCG	5.96419	AGTAAAACGCCCCATC	GATGGGGCGTTTTACT	3.2211	GCATAAACGCCCACTT	AAGTGGGCGTTTATGC	NA	GCAGAAACGCCCAGTA	TACTGGGCGTTTCTGC	NA	GTAAAAACGCCCTATA	TATAGGGCGTTTTTAC	NA	GCGAAAACGCCCTTCA	TGAAGGGCGTTTTCGC	-0.633765	NA	0.746611	0.566963	NA	NA	NA
AAACGCCG	CGGCGTTT	4.75018	ACAAAAACGCCGGTCG	CGACCGGCGTTTTTGT	NA	CGCAAAACGCCGCATA	TATGCGGCGTTTTGCG	5.5796	AGTAAAACGCCGCATC	GATGCGGCGTTTTACT	1.87423	GCATAAACGCCGACTT	AAGTCGGCGTTTATGC	NA	GCAGAAACGCCGAGTA	TACTCGGCGTTTCTGC	NA	GTAAAAACGCCGTATA	TATACGGCGTTTTTAC	NA	GCGAAAACGCCGTTCA	TGAACGGCGTTTTCGC	1.34876	NA	0.293799	-0.793696	NA	NA	NA
AAACGCCT	AGGCGTTT	4.60675	ACAAAAACGCCTGTCG	CGACAGGCGTTTTTGT	NA	CGCAAAACGCCTCATA	TATGAGGCGTTTTGCG	6.31651	AGTAAAACGCCTCATC	GATGAGGCGTTTTACT	2.50494	GCATAAACGCCTACTT	AAGTAGGCGTTTATGC	4.30012	GCAGAAACGCCTAGTA	TACTAGGCGTTTCTGC	NA	GTAAAAACGCCTTATA	TATAAGGCGTTTTTAC	1.36798	GCGAAAACGCCTTTCA	TGAAAGGCGTTTTCGC	1.14436	NA	1.16143	-0.156535	0.202213	NA	-1.40707
AAACGCGA	TCGCGTTT	4.46873	ACAAAAACGCGAGTCG	CGACTCGCGTTTTTGT	4.93158	CGCAAAACGCGACATA	TATGTCGCGTTTTGCG	6.05895	AGTAAAACGCGACATC	GATGTCGCGTTTTACT	2.62146	GCATAAACGCGAACTT	AAGTTCGCGTTTATGC	3.90001	GCAGAAACGCGAAGTA	TACTTCGCGTTTCTGC	5.18697	GTAAAAACGCGATATA	TATATCGCGTTTTTAC	1.66051	GCGAAAACGCGATTCA	TGAATCGCGTTTTCGC	0.947697	0.0686841	0.85818	-0.0388157	-0.131325	2.19604	-1.10342
AAACGCGC	GCGCGTTT	4.14499	ACAAAAACGCGCGTCG	CGACGCGCGTTTTTGT	NA	CGCAAAACGCGCCATA	TATGGCGCGTTTTGCG	5.4326	AGTAAAACGCGCCATC	GATGGCGCGTTTTACT	0.453776	GCATAAACGCGCACTT	AAGTGCGCGTTTATGC	4.55227	GCAGAAACGCGCAGTA	TACTGCGCGTTTCTGC	NA	GTAAAAACGCGCTATA	TATAGCGCGTTTTTAC	3.22359	GCGAAAACGCGCTTCA	TGAAGCGCGTTTTCGC	0.486366	NA	0.120719	-2.22869	0.412404	NA	0.519016
AAACGCGG	CCGCGTTT	4.07779	ACAAAAACGCGGGTCG	CGACCCGCGTTTTTGT	NA	CGCAAAACGCGGCATA	TATGCCGCGTTTTGCG	6.46776	AGTAAAACGCGGCATC	GATGCCGCGTTTTACT	2.63188	GCATAAACGCGGACTT	AAGTCCGCGTTTATGC	4.06202	GCAGAAACGCGGAGTA	TACTCCGCGTTTCTGC	3.66349	GTAAAAACGCGGTATA	TATACCGCGTTTTTAC	2.43772	GCGAAAACGCGGTTCA	TGAACCGCGTTTTCGC	0.390603	NA	1.3395	-0.0282951	0.00372687	0.779645	-0.296695
AAACGCGT	ACGCGTTT	3.82776	ACAAAAACGCGTGTCG	CGACACGCGTTTTTGT	5.88045	CGCAAAACGCGTCATA	TATGACGCGTTTTGCG	6.1051	AGTAAAACGCGTCATC	GATGACGCGTTTTACT	2.16285	GCATAAACGCGTACTT	AAGTACGCGTTTATGC	4.98894	GCAGAAACGCGTAGTA	TACTACGCGTTTCTGC	1.73594	GTAAAAACGCGTTATA	TATAACGCGTTTTTAC	NA	GCGAAAACGCGTTTCA	TGAAACGCGTTTTCGC	0.034314	1.33292	0.912514	-0.502117	0.776425	-1.01241	NA
AAACGCTA	TAGCGTTT	3.19681	ACAAAAACGCTAGTCG	CGACTAGCGTTTTTGT	NA	CGCAAAACGCTACATA	TATGTAGCGTTTTGCG	5.48451	AGTAAAACGCTACATC	GATGTAGCGTTTTACT	1.72016	GCATAAACGCTAACTT	AAGTTAGCGTTTATGC	NA	GCAGAAACGCTAAGTA	TACTTAGCGTTTCTGC	3.63522	GTAAAAACGCTATATA	TATATAGCGTTTTTAC	NA	GCGAAAACGCTATTCA	TGAATAGCGTTTTCGC	-0.864794	NA	0.181847	-0.94934	NA	0.753359	NA
AAACGCTC	GAGCGTTT	3.49184	ACAAAAACGCTCGTCG	CGACGAGCGTTTTTGT	4.91162	CGCAAAACGCTCCATA	TATGGAGCGTTTTGCG	4.63905	AGTAAAACGCTCCATC	GATGGAGCGTTTTACT	1.50744	GCATAAACGCTCACTT	AAGTGAGCGTTTATGC	4.84194	GCAGAAACGCTCAGTA	TACTGAGCGTTTCTGC	3.45362	GTAAAAACGCTCTATA	TATAGAGCGTTTTTAC	NA	GCGAAAACGCTCTTCA	TGAAGAGCGTTTTCGC	-0.444378	0.0420963	-0.813592	-1.16424	0.653877	0.584526	NA
AAACGCTG	CAGCGTTT	3.91726	ACAAAAACGCTGGTCG	CGACCAGCGTTTTTGT	NA	CGCAAAACGCTGCATA	TATGCAGCGTTTTGCG	5.54972	AGTAAAACGCTGCATC	GATGCAGCGTTTTACT	2.72743	GCATAAACGCTGACTT	AAGTCAGCGTTTATGC	NA	GCAGAAACGCTGAGTA	TACTCAGCGTTTCTGC	3.83005	GTAAAAACGCTGTATA	TATACAGCGTTTTTAC	2.50996	GCGAAAACGCTGTTCA	TGAACAGCGTTTTCGC	0.16185	NA	0.258621	0.0682362	NA	0.934496	-0.221714
AAACGCTT	AAGCGTTT	3.63359	ACAAAAACGCTTGTCG	CGACAAGCGTTTTTGT	5.11243	CGCAAAACGCTTCATA	TATGAAGCGTTTTGCG	5.25802	AGTAAAACGCTTCATC	GATGAAGCGTTTTACT	1.48004	GCATAAACGCTTACTT	AAGTAAGCGTTTATGC	4.46503	GCAGAAACGCTTAGTA	TACTAAGCGTTTCTGC	NA	GTAAAAACGCTTTATA	TATAAAGCGTTTTTAC	2.43964	GCGAAAACGCTTTTCA	TGAAAAGCGTTTTCGC	-0.24238	0.309649	-0.0848244	-1.19192	0.339682	NA	-0.294701
AAACGGAA	TTCCGTTT	5.3079	ACAAAAACGGAAGTCG	CGACTTCCGTTTTTGT	NA	CGCAAAACGGAACATA	TATGTTCCGTTTTGCG	5.4756	AGTAAAACGGAACATC	GATGTTCCGTTTTACT	2.55787	GCATAAACGGAAACTT	AAGTTTCCGTTTATGC	3.95518	GCAGAAACGGAAAGTA	TACTTTCCGTTTCTGC	3.73031	GTAAAAACGGAATATA	TATATTCCGTTTTTAC	3.9701	GCGAAAACGGAATTCA	TGAATTCCGTTTTCGC	2.14351	NA	0.171354	-0.103061	-0.0853402	0.841764	1.29387
AAACGGAC	GTCCGTTT	3.87345	ACAAAAACGGACGTCG	CGACGTCCGTTTTTGT	NA	CGCAAAACGGACCATA	TATGGTCCGTTTTGCG	6.0173	AGTAAAACGGACCATC	GATGGTCCGTTTTACT	2.60495	GCATAAACGGACACTT	AAGTGTCCGTTTATGC	NA	GCAGAAACGGACAGTA	TACTGTCCGTTTCTGC	1.90594	GTAAAAACGGACTATA	TATAGTCCGTTTTTAC	NA	GCGAAAACGGACTTCA	TGAAGTCCGTTTTCGC	0.0994252	NA	0.809136	-0.055501	NA	-0.854359	NA
AAACGGAG	CTCCGTTT	3.97248	ACAAAAACGGAGGTCG	CGACCTCCGTTTTTGT	4.3229	CGCAAAACGGAGCATA	TATGCTCCGTTTTGCG	4.95678	AGTAAAACGGAGCATC	GATGCTCCGTTTTACT	NA	GCATAAACGGAGACTT	AAGTCTCCGTTTATGC	NA	GCAGAAACGGAGAGTA	TACTCTCCGTTTCTGC	0.332459	GTAAAAACGGAGTATA	TATACTCCGTTTTTAC	1.27853	GCGAAAACGGAGTTCA	TGAACTCCGTTTTCGC	0.240542	-0.742286	-0.439501	NA	NA	-2.31724	-1.49992
AAACGGAT	ATCCGTTT	5.5325	ACAAAAACGGATGTCG	CGACATCCGTTTTTGT	4.55482	CGCAAAACGGATCATA	TATGATCCGTTTTGCG	6.0003	AGTAAAACGGATCATC	GATGATCCGTTTTACT	1.79129	GCATAAACGGATACTT	AAGTATCCGTTTATGC	4.45857	GCAGAAACGGATAGTA	TACTATCCGTTTCTGC	2.46758	GTAAAAACGGATTATA	TATAATCCGTTTTTAC	NA	GCGAAAACGGATTTCA	TGAAATCCGTTTTCGC	2.46356	-0.433292	0.789121	-0.877484	0.3343	-0.332203	NA
AAACGGCA	TGCCGTTT	3.62944	ACAAAAACGGCAGTCG	CGACTGCCGTTTTTGT	5.20976	CGCAAAACGGCACATA	TATGTGCCGTTTTGCG	5.80996	AGTAAAACGGCACATC	GATGTGCCGTTTTACT	1.81961	GCATAAACGGCAACTT	AAGTTGCCGTTTATGC	4.74401	GCAGAAACGGCAAGTA	TACTTGCCGTTTCTGC	3.41692	GTAAAAACGGCATATA	TATATGCCGTTTTTAC	3.33777	GCGAAAACGGCATTCA	TGAATGCCGTTTTCGC	-0.248301	0.439324	0.565025	-0.848877	0.572248	0.550403	0.637529
AAACGGCC	GGCCGTTT	4.38148	ACAAAAACGGCCGTCG	CGACGGCCGTTTTTGT	NA	CGCAAAACGGCCCATA	TATGGGCCGTTTTGCG	5.89555	AGTAAAACGGCCCATC	GATGGGCCGTTTTACT	3.07899	GCATAAACGGCCACTT	AAGTGGCCGTTTATGC	3.17407	GCAGAAACGGCCAGTA	TACTGGCCGTTTCTGC	1.62264	GTAAAAACGGCCTATA	TATAGGCCGTTTTTAC	3.87885	GCGAAAACGGCCTTCA	TGAAGGCCGTTTTCGC	0.82336	NA	0.665792	0.423394	-0.736485	-1.11775	1.19916
AAACGGCG	CGCCGTTT	4.63827	ACAAAAACGGCGGTCG	CGACCGCCGTTTTTGT	5.7217	CGCAAAACGGCGCATA	TATGCGCCGTTTTGCG	5.1475	AGTAAAACGGCGCATC	GATGCGCCGTTTTACT	1.20322	GCATAAACGGCGACTT	AAGTCGCCGTTTATGC	4.95037	GCAGAAACGGCGAGTA	TACTCGCCGTTTCTGC	3.71009	GTAAAAACGGCGTATA	TATACGCCGTTTTTAC	2.08965	GCGAAAACGGCGTTCA	TGAACGCCGTTTTCGC	1.18929	1.12141	-0.214949	-1.47157	0.744272	0.822973	-0.657989
AAACGGCT	AGCCGTTT	3.86174	ACAAAAACGGCTGTCG	CGACAGCCGTTTTTGT	NA	CGCAAAACGGCTCATA	TATGAGCCGTTTTGCG	5.18497	AGTAAAACGGCTCATC	GATGAGCCGTTTTACT	1.34461	GCATAAACGGCTACTT	AAGTAGCCGTTTATGC	3.68048	GCAGAAACGGCTAGTA	TACTAGCCGTTTCTGC	1.55941	GTAAAAACGGCTTATA	TATAAGCCGTTTTTAC	1.44951	GCGAAAACGGCTTTCA	TGAAAGCCGTTTTCGC	0.0827371	NA	-0.170832	-1.32874	-0.314334	-1.17653	-1.32244
AAACGGGA	TCCCGTTT	3.30039	ACAAAAACGGGAGTCG	CGACTCCCGTTTTTGT	5.09049	CGCAAAACGGGACATA	TATGTCCCGTTTTGCG	5.23744	AGTAAAACGGGACATC	GATGTCCCGTTTTACT	3.15862	GCATAAACGGGAACTT	AAGTTCCCGTTTATGC	6.57957	GCAGAAACGGGAAGTA	TACTTCCCGTTTCTGC	3.628	GTAAAAACGGGATATA	TATATCCCGTTTTTAC	NA	GCGAAAACGGGATTCA	TGAATCCCGTTTTCGC	-0.717188	0.28042	-0.10906	0.503841	2.10239	0.74665	NA
AAACGGGC	GCCCGTTT	3.89718	ACAAAAACGGGCGTCG	CGACGCCCGTTTTTGT	5.75778	CGCAAAACGGGCCATA	TATGGCCCGTTTTGCG	5.51984	AGTAAAACGGGCCATC	GATGGCCCGTTTTACT	2.30652	GCATAAACGGGCACTT	AAGTGCCCGTTTATGC	3.48779	GCAGAAACGGGCAGTA	TACTGCCCGTTTCTGC	3.32146	GTAAAAACGGGCTATA	TATAGCCCGTTTTTAC	1.33108	GCGAAAACGGGCTTCA	TGAAGCCCGTTTTCGC	0.133235	1.16948	0.223442	-0.356983	-0.474962	0.461659	-1.44537
AAACGGGG	CCCCGTTT	3.75136	ACAAAAACGGGGGTCG	CGACCCCCGTTTTTGT	5.12752	CGCAAAACGGGGCATA	TATGCCCCGTTTTGCG	5.24138	AGTAAAACGGGGCATC	GATGCCCCGTTTTACT	2.23598	GCATAAACGGGGACTT	AAGTCCCCGTTTATGC	3.88969	GCAGAAACGGGGAGTA	TACTCCCCGTTTCTGC	2.98723	GTAAAAACGGGGTATA	TATACCCCGTTTTTAC	1.84011	GCGAAAACGGGGTTCA	TGAACCCCGTTTTCGC	-0.0745529	0.329747	-0.104411	-0.428242	-0.139932	0.150924	-0.917003
AAACGGGT	ACCCGTTT	4.28408	ACAAAAACGGGTGTCG	CGACACCCGTTTTTGT	5.25616	CGCAAAACGGGTCATA	TATGACCCGTTTTGCG	5.43652	AGTAAAACGGGTCATC	GATGACCCGTTTTACT	2.03246	GCATAAACGGGTACTT	AAGTACCCGTTTATGC	3.47953	GCAGAAACGGGTAGTA	TACTACCCGTTTCTGC	1.35174	GTAAAAACGGGTTATA	TATAACCCGTTTTTAC	1.49011	GCGAAAACGGGTTTCA	TGAAACCCGTTTTCGC	0.684571	0.501146	0.125339	-0.633847	-0.481842	-1.36961	-1.28029
AAACGGTA	TACCGTTT	3.276	ACAAAAACGGTAGTCG	CGACTACCGTTTTTGT	NA	CGCAAAACGGTACATA	TATGTACCGTTTTGCG	5.47797	AGTAAAACGGTACATC	GATGTACCGTTTTACT	1.20596	GCATAAACGGTAACTT	AAGTTACCGTTTATGC	1.69403	GCAGAAACGGTAAGTA	TACTTACCGTTTCTGC	2.30699	GTAAAAACGGTATATA	TATATACCGTTTTTAC	1.46393	GCGAAAACGGTATTCA	TGAATACCGTTTTCGC	-0.751944	NA	0.174142	-1.4688	-1.97026	-0.481507	-1.30747
AAACGGTC	GACCGTTT	3.39637	ACAAAAACGGTCGTCG	CGACGACCGTTTTTGT	5.10612	CGCAAAACGGTCCATA	TATGGACCGTTTTGCG	6.1	AGTAAAACGGTCCATC	GATGGACCGTTTTACT	-0.170668	GCATAAACGGTCACTT	AAGTGACCGTTTATGC	4.01466	GCAGAAACGGTCAGTA	TACTGACCGTTTCTGC	2.95199	GTAAAAACGGTCTATA	TATAGACCGTTTTTAC	3.23747	GCGAAAACGGTCTTCA	TGAAGACCGTTTTCGC	-0.58042	0.301234	0.906511	-2.85952	-0.0357519	0.118156	0.533421
AAACGGTG	CACCGTTT	3.24945	ACAAAAACGGTGGTCG	CGACCACCGTTTTTGT	4.76678	CGCAAAACGGTGCATA	TATGCACCGTTTTGCG	4.95254	AGTAAAACGGTGCATC	GATGCACCGTTTTACT	2.29408	GCATAAACGGTGACTT	AAGTCACCGTTTATGC	2.9681	GCAGAAACGGTGAGTA	TACTCACCGTTTCTGC	1.63038	GTAAAAACGGTGTATA	TATACACCGTTTTTAC	1.07757	GCGAAAACGGTGTTCA	TGAACACCGTTTTCGC	-0.789781	-0.150884	-0.444496	-0.369548	-0.908177	-1.11055	-1.70851
AAACGGTT	AACCGTTT	3.73545	ACAAAAACGGTTGTCG	CGACAACCGTTTTTGT	4.11954	CGCAAAACGGTTCATA	TATGAACCGTTTTGCG	5.50111	AGTAAAACGGTTCATC	GATGAACCGTTTTACT	1.45498	GCATAAACGGTTACTT	AAGTAACCGTTTATGC	2.61137	GCAGAAACGGTTAGTA	TACTAACCGTTTCTGC	2.52266	GTAAAAACGGTTTATA	TATAAACCGTTTTTAC	1.95704	GCGAAAACGGTTTTCA	TGAAAACCGTTTTCGC	-0.0972303	-1.01324	0.201385	-1.21723	-1.20556	-0.280989	-0.795635
AAACGTAA	TTACGTTT	3.40147	ACAAAAACGTAAGTCG	CGACTTACGTTTTTGT	NA	CGCAAAACGTAACATA	TATGTTACGTTTTGCG	5.88999	AGTAAAACGTAACATC	GATGTTACGTTTTACT	NA	GCATAAACGTAAACTT	AAGTTTACGTTTATGC	3.93358	GCAGAAACGTAAAGTA	TACTTTACGTTTCTGC	3.17974	GTAAAAACGTAATATA	TATATTACGTTTTTAC	3.33231	GCGAAAACGTAATTCA	TGAATTACGTTTTCGC	-0.573158	NA	0.659244	NA	-0.103343	0.3299	0.631861
AAACGTAC	GTACGTTT	4.04315	ACAAAAACGTACGTCG	CGACGTACGTTTTTGT	NA	CGCAAAACGTACCATA	TATGGTACGTTTTGCG	5.35882	AGTAAAACGTACCATC	GATGGTACGTTTTACT	2.35991	GCATAAACGTACACTT	AAGTGTACGTTTATGC	NA	GCAGAAACGTACAGTA	TACTGTACGTTTCTGC	3.27311	GTAAAAACGTACTATA	TATAGTACGTTTTTAC	NA	GCGAAAACGTACTTCA	TGAAGTACGTTTTCGC	0.341242	NA	0.0338613	-0.303044	NA	0.416702	NA
AAACGTAG	CTACGTTT	4.8974	ACAAAAACGTAGGTCG	CGACCTACGTTTTTGT	5.78769	CGCAAAACGTAGCATA	TATGCTACGTTTTGCG	5.30757	AGTAAAACGTAGCATC	GATGCTACGTTTTACT	1.39278	GCATAAACGTAGACTT	AAGTCTACGTTTATGC	3.29358	GCAGAAACGTAGAGTA	TACTCTACGTTTCTGC	2.81621	GTAAAAACGTAGTATA	TATACTACGTTTTTAC	NA	GCGAAAACGTAGTTCA	TGAACTACGTTTTCGC	1.55855	1.20933	-0.0264878	-1.28007	-0.636855	-0.0080777	NA
AAACGTAT	ATACGTTT	3.69435	ACAAAAACGTATGTCG	CGACATACGTTTTTGT	NA	CGCAAAACGTATCATA	TATGATACGTTTTGCG	5.53869	AGTAAAACGTATCATC	GATGATACGTTTTACT	1.83422	GCATAAACGTATACTT	AAGTATACGTTTATGC	4.14417	GCAGAAACGTATAGTA	TACTATACGTTTCTGC	1.85126	GTAAAAACGTATTATA	TATAATACGTTTTTAC	2.74497	GCGAAAACGTATTTCA	TGAAATACGTTTTCGC	-0.155792	NA	0.245632	-0.834115	0.0722119	-0.905198	0.0222227
AAACGTCA	TGACGTTT	4.42138	ACAAAAACGTCAGTCG	CGACTGACGTTTTTGT	4.82186	CGCAAAACGTCACATA	TATGTGACGTTTTGCG	6.00357	AGTAAAACGTCACATC	GATGTGACGTTTTACT	1.69303	GCATAAACGTCAACTT	AAGTTGACGTTTATGC	4.93108	GCAGAAACGTCAAGTA	TACTTGACGTTTCTGC	4.43554	GTAAAAACGTCATATA	TATATGACGTTTTTAC	0.896397	GCGAAAACGTCATTCA	TGAATGACGTTTTCGC	0.880214	-0.0774988	0.792981	-0.976752	0.728184	1.49743	-1.89656
AAACGTCC	GGACGTTT	4.15003	ACAAAAACGTCCGTCG	CGACGGACGTTTTTGT	NA	CGCAAAACGTCCCATA	TATGGGACGTTTTGCG	5.3673	AGTAAAACGTCCCATC	GATGGGACGTTTTACT	1.90609	GCATAAACGTCCACTT	AAGTGGACGTTTATGC	4.80142	GCAGAAACGTCCAGTA	TACTGGACGTTTCTGC	NA	GTAAAAACGTCCTATA	TATAGGACGTTTTTAC	NA	GCGAAAACGTCCTTCA	TGAAGGACGTTTTCGC	0.493542	NA	0.0438445	-0.761507	0.620105	NA	NA
AAACGTCG	CGACGTTT	4.28305	ACAAAAACGTCGGTCG	CGACCGACGTTTTTGT	5.40798	CGCAAAACGTCGCATA	TATGCGACGTTTTGCG	5.59182	AGTAAAACGTCGCATC	GATGCGACGTTTTACT	2.03288	GCATAAACGTCGACTT	AAGTCGACGTTTATGC	5.0083	GCAGAAACGTCGAGTA	TACTCGACGTTTCTGC	4.37206	GTAAAAACGTCGTATA	TATACGACGTTTTTAC	2.06491	GCGAAAACGTCGTTCA	TGAACGACGTTTTCGC	0.683102	0.703423	0.308186	-0.633426	0.792561	1.43841	-0.683669
AAACGTCT	AGACGTTT	4.50358	ACAAAAACGTCTGTCG	CGACAGACGTTTTTGT	5.31802	CGCAAAACGTCTCATA	TATGAGACGTTTTGCG	5.40654	AGTAAAACGTCTCATC	GATGAGACGTTTTACT	2.89645	GCATAAACGTCTACTT	AAGTAGACGTTTATGC	4.83726	GCAGAAACGTCTAGTA	TACTAGACGTTTCTGC	2.81779	GTAAAAACGTCTTATA	TATAAGACGTTTTTAC	NA	GCGAAAACGTCTTTCA	TGAAAGACGTTTTCGC	0.997358	0.583567	0.0900365	0.238989	0.649976	-0.00660963	NA
AAACGTGA	TCACGTTT	4.44666	ACAAAAACGTGAGTCG	CGACTCACGTTTTTGT	NA	CGCAAAACGTGACATA	TATGTCACGTTTTGCG	5.5937	AGTAAAACGTGACATC	GATGTCACGTTTTACT	0.987735	GCATAAACGTGAACTT	AAGTTCACGTTTATGC	3.65989	GCAGAAACGTGAAGTA	TACTTCACGTTTCTGC	4.4018	GTAAAAACGTGATATA	TATATCACGTTTTTAC	NA	GCGAAAACGTGATTCA	TGAATCACGTTTTCGC	0.916238	NA	0.310396	-1.68926	-0.331494	1.46605	NA
AAACGTGC	GCACGTTT	3.96812	ACAAAAACGTGCGTCG	CGACGCACGTTTTTGT	NA	CGCAAAACGTGCCATA	TATGGCACGTTTTGCG	5.54005	AGTAAAACGTGCCATC	GATGGCACGTTTTACT	2.5581	GCATAAACGTGCACTT	AAGTGCACGTTTATGC	NA	GCAGAAACGTGCAGTA	TACTGCACGTTTCTGC	2.96543	GTAAAAACGTGCTATA	TATAGCACGTTTTTAC	1.89327	GCGAAAACGTGCTTCA	TGAAGCACGTTTTCGC	0.234321	NA	0.247233	-0.102826	NA	0.130652	-0.861822
AAACGTGG	CCACGTTT	4.11663	ACAAAAACGTGGGTCG	CGACCCACGTTTTTGT	4.84846	CGCAAAACGTGGCATA	TATGCCACGTTTTGCG	5.69034	AGTAAAACGTGGCATC	GATGCCACGTTTTACT	0.987735	GCATAAACGTGGACTT	AAGTCCACGTTTATGC	3.3063	GCAGAAACGTGGAGTA	TACTCCACGTTTCTGC	3.12045	GTAAAAACGTGGTATA	TATACCACGTTTTTAC	2.61669	GCGAAAACGTGGTTCA	TGAACCACGTTTTCGC	0.44595	-0.0420577	0.424179	-1.68926	-0.626249	0.274777	-0.110931
AAACGTGT	ACACGTTT	3.70782	ACAAAAACGTGTGTCG	CGACACACGTTTTTGT	5.24974	CGCAAAACGTGTCATA	TATGACACGTTTTGCG	6.25331	AGTAAAACGTGTCATC	GATGACACGTTTTACT	NA	GCATAAACGTGTACTT	AAGTACACGTTTATGC	5.00183	GCAGAAACGTGTAGTA	TACTACACGTTTCTGC	2.52918	GTAAAAACGTGTTATA	TATAACACGTTTTTAC	0.798768	GCGAAAACGTGTTTCA	TGAAACACGTTTTCGC	-0.136608	0.492592	1.08702	NA	0.787164	-0.274934	-1.9979
AAACGTTA	TAACGTTT	3.50243	ACAAAAACGTTAGTCG	CGACTAACGTTTTTGT	NA	CGCAAAACGTTACATA	TATGTAACGTTTTGCG	4.7225	AGTAAAACGTTACATC	GATGTAACGTTTTACT	0.756985	GCATAAACGTTAACTT	AAGTTAACGTTTATGC	2.94528	GCAGAAACGTTAAGTA	TACTTAACGTTTCTGC	1.68101	GTAAAAACGTTATATA	TATATAACGTTTTTAC	2.22757	GCGAAAACGTTATTCA	TGAATAACGTTTTCGC	-0.429282	NA	-0.715342	-1.92238	-0.9272	-1.06348	-0.514831
AAACGTTC	GAACGTTT	4.26148	ACAAAAACGTTCGTCG	CGACGAACGTTTTTGT	NA	CGCAAAACGTTCCATA	TATGGAACGTTTTGCG	5.74586	AGTAAAACGTTCCATC	GATGGAACGTTTTACT	2.55076	GCATAAACGTTCACTT	AAGTGAACGTTTATGC	4.31587	GCAGAAACGTTCAGTA	TACTGAACGTTTCTGC	3.40013	GTAAAAACGTTCTATA	TATAGAACGTTTTTAC	2.87503	GCGAAAACGTTCTTCA	TGAAGAACGTTTTCGC	0.652358	NA	0.489553	-0.110239	0.215343	0.534795	0.157223
AAACGTTG	CAACGTTT	4.39264	ACAAAAACGTTGGTCG	CGACCAACGTTTTTGT	5.42782	CGCAAAACGTTGCATA	TATGCAACGTTTTGCG	5.09033	AGTAAAACGTTGCATC	GATGCAACGTTTTACT	2.04728	GCATAAACGTTGACTT	AAGTCAACGTTTATGC	4.3602	GCAGAAACGTTGAGTA	TACTCAACGTTTCTGC	3.55786	GTAAAAACGTTGTATA	TATACAACGTTTTTAC	0.453045	GCGAAAACGTTGTTCA	TGAACAACGTTTTCGC	0.839269	0.729853	-0.28226	-0.618877	0.252293	0.681436	-2.35675
AAACGTTT	AAACGTTT	3.62512	ACAAAAACGTTTGTCG	CGACAAACGTTTTTGT	5.39636	CGCAAAACGTTTCATA	TATGAAACGTTTTGCG	5.12222	AGTAAAACGTTTCATC	GATGAAACGTTTTACT	1.03077	GCATAAACGTTTACTT	AAGTAAACGTTTATGC	4.71495	GCAGAAACGTTTAGTA	TACTAAACGTTTCTGC	3.32001	GTAAAAACGTTTTATA	TATAAAACGTTTTTAC	NA	GCGAAAACGTTTTTCA	TGAAAAACGTTTTCGC	-0.254452	0.687935	-0.244707	-1.64579	0.548019	0.460307	NA
AAACTAAA	TTTAGTTT	5.42543	ACAAAAACTAAAGTCG	CGACTTTAGTTTTTGT	NA	CGCAAAACTAAACATA	TATGTTTAGTTTTGCG	5.35283	AGTAAAACTAAACATC	GATGTTTAGTTTTACT	NA	GCATAAACTAAAACTT	AAGTTTTAGTTTATGC	3.49985	GCAGAAACTAAAAGTA	TACTTTTAGTTTCTGC	NA	GTAAAAACTAAATATA	TATATTTAGTTTTTAC	NA	GCGAAAACTAAATTCA	TGAATTTAGTTTTCGC	2.31099	NA	0.0268011	NA	-0.464903	NA	NA
AAACTAAC	GTTAGTTT	3.98911	ACAAAAACTAACGTCG	CGACGTTAGTTTTTGT	3.7715	CGCAAAACTAACCATA	TATGGTTAGTTTTGCG	4.50439	AGTAAAACTAACCATC	GATGGTTAGTTTTACT	2.05559	GCATAAACTAACACTT	AAGTGTTAGTTTATGC	4.24482	GCAGAAACTAACAGTA	TACTGTTAGTTTCTGC	NA	GTAAAAACTAACTATA	TATAGTTAGTTTTTAC	NA	GCGAAAACTAACTTCA	TGAAGTTAGTTTTCGC	0.264227	-1.47695	-0.972139	-0.610476	0.156114	NA	NA
AAACTAAG	CTTAGTTT	3.26793	ACAAAAACTAAGGTCG	CGACCTTAGTTTTTGT	NA	CGCAAAACTAAGCATA	TATGCTTAGTTTTGCG	5.62737	AGTAAAACTAAGCATC	GATGCTTAGTTTTACT	1.9416	GCATAAACTAAGACTT	AAGTCTTAGTTTATGC	3.00766	GCAGAAACTAAGAGTA	TACTCTTAGTTTCTGC	1.89154	GTAAAAACTAAGTATA	TATACTTAGTTTTTAC	NA	GCGAAAACTAAGTTCA	TGAACTTAGTTTTCGC	-0.763447	NA	0.350045	-0.725637	-0.875201	-0.867752	NA
AAACTAAT	ATTAGTTT	3.74868	ACAAAAACTAATGTCG	CGACATTAGTTTTTGT	NA	CGCAAAACTAATCATA	TATGATTAGTTTTGCG	4.40256	AGTAAAACTAATCATC	GATGATTAGTTTTACT	2.38112	GCATAAACTAATACTT	AAGTATTAGTTTATGC	1.30734	GCAGAAACTAATAGTA	TACTATTAGTTTCTGC	NA	GTAAAAACTAATTATA	TATAATTAGTTTTTAC	NA	GCGAAAACTAATTTCA	TGAAATTAGTTTTCGC	-0.078374	NA	-1.09203	-0.281617	-2.29262	NA	NA
AAACTACA	TGTAGTTT	4.56338	ACAAAAACTACAGTCG	CGACTGTAGTTTTTGT	NA	CGCAAAACTACACATA	TATGTGTAGTTTTGCG	5.10431	AGTAAAACTACACATC	GATGTGTAGTTTTACT	2.66624	GCATAAACTACAACTT	AAGTTGTAGTTTATGC	4.15997	GCAGAAACTACAAGTA	TACTTGTAGTTTCTGC	NA	GTAAAAACTACATATA	TATATGTAGTTTTTAC	NA	GCGAAAACTACATTCA	TGAATGTAGTTTTCGC	1.08256	NA	-0.265805	0.00642019	0.0853779	NA	NA
AAACTACC	GGTAGTTT	3.65203	ACAAAAACTACCGTCG	CGACGGTAGTTTTTGT	NA	CGCAAAACTACCCATA	TATGGGTAGTTTTGCG	5.14864	AGTAAAACTACCCATC	GATGGGTAGTTTTACT	0.955303	GCATAAACTACCACTT	AAGTGGTAGTTTATGC	NA	GCAGAAACTACCAGTA	TACTGGTAGTTTCTGC	NA	GTAAAAACTACCTATA	TATAGGTAGTTTTTAC	NA	GCGAAAACTACCTTCA	TGAAGGTAGTTTTCGC	-0.216104	NA	-0.213608	-1.72203	NA	NA	NA
AAACTACG	CGTAGTTT	3.71434	ACAAAAACTACGGTCG	CGACCGTAGTTTTTGT	NA	CGCAAAACTACGCATA	TATGCGTAGTTTTGCG	5.48259	AGTAAAACTACGCATC	GATGCGTAGTTTTACT	3.13407	GCATAAACTACGACTT	AAGTCGTAGTTTATGC	NA	GCAGAAACTACGAGTA	TACTCGTAGTTTCTGC	3.49772	GTAAAAACTACGTATA	TATACGTAGTTTTTAC	NA	GCGAAAACTACGTTCA	TGAACGTAGTTTTCGC	-0.127318	NA	0.179582	0.479039	NA	0.625528	NA
AAACTACT	AGTAGTTT	4.22776	ACAAAAACTACTGTCG	CGACAGTAGTTTTTGT	NA	CGCAAAACTACTCATA	TATGAGTAGTTTTGCG	5.88371	AGTAAAACTACTCATC	GATGAGTAGTTTTACT	0.903903	GCATAAACTACTACTT	AAGTAGTAGTTTATGC	4.16389	GCAGAAACTACTAGTA	TACTAGTAGTTTCTGC	2.90024	GTAAAAACTACTTATA	TATAAGTAGTTTTTAC	NA	GCGAAAACTACTTTCA	TGAAAGTAGTTTTCGC	0.604317	NA	0.651859	-1.77395	0.0886463	0.0700486	NA
AAACTAGA	TCTAGTTT	4.64749	ACAAAAACTAGAGTCG	CGACTCTAGTTTTTGT	NA	CGCAAAACTAGACATA	TATGTCTAGTTTTGCG	5.47901	AGTAAAACTAGACATC	GATGTCTAGTTTTACT	2.26642	GCATAAACTAGAACTT	AAGTTCTAGTTTATGC	3.79342	GCAGAAACTAGAAGTA	TACTTCTAGTTTCTGC	3.07502	GTAAAAACTAGATATA	TATATCTAGTTTTTAC	NA	GCGAAAACTAGATTCA	TGAATCTAGTTTTCGC	1.20242	NA	0.175372	-0.397491	-0.220178	0.232543	NA
AAACTAGC	GCTAGTTT	4.65771	ACAAAAACTAGCGTCG	CGACGCTAGTTTTTGT	NA	CGCAAAACTAGCCATA	TATGGCTAGTTTTGCG	4.90548	AGTAAAACTAGCCATC	GATGGCTAGTTTTACT	2.12939	GCATAAACTAGCACTT	AAGTGCTAGTTTATGC	3.71689	GCAGAAACTAGCAGTA	TACTGCTAGTTTCTGC	NA	GTAAAAACTAGCTATA	TATAGCTAGTTTTTAC	NA	GCGAAAACTAGCTTCA	TGAAGCTAGTTTTCGC	1.21699	NA	-0.499895	-0.535929	-0.283977	NA	NA
AAACTAGG	CCTAGTTT	3.80963	ACAAAAACTAGGGTCG	CGACCCTAGTTTTTGT	3.81676	CGCAAAACTAGGCATA	TATGCCTAGTTTTGCG	4.95048	AGTAAAACTAGGCATC	GATGCCTAGTTTTACT	NA	GCATAAACTAGGACTT	AAGTCCTAGTTTATGC	3.08724	GCAGAAACTAGGAGTA	TACTCCTAGTTTCTGC	0.680349	GTAAAAACTAGGTATA	TATACCTAGTTTTTAC	1.03685	GCGAAAACTAGGTTCA	TGAACCTAGTTTTCGC	0.00847128	-1.41664	-0.446919	NA	-0.808866	-1.9938	-1.75077
AAACTAGT	ACTAGTTT	3.97724	ACAAAAACTAGTGTCG	CGACACTAGTTTTTGT	NA	CGCAAAACTAGTCATA	TATGACTAGTTTTGCG	4.97434	AGTAAAACTAGTCATC	GATGACTAGTTTTACT	2.42221	GCATAAACTAGTACTT	AAGTACTAGTTTATGC	3.57772	GCAGAAACTAGTAGTA	TACTACTAGTTTCTGC	2.12698	GTAAAAACTAGTTATA	TATAACTAGTTTTTAC	2.12244	GCGAAAACTAGTTTCA	TGAAACTAGTTTTCGC	0.247325	NA	-0.418827	-0.240112	-0.399989	-0.648862	-0.623958
AAACTATA	TATAGTTT	3.92738	ACAAAAACTATAGTCG	CGACTATAGTTTTTGT	NA	CGCAAAACTATACATA	TATGTATAGTTTTGCG	NA	AGTAAAACTATACATC	GATGTATAGTTTTACT	3.13443	GCATAAACTATAACTT	AAGTTATAGTTTATGC	4.18508	GCAGAAACTATAAGTA	TACTTATAGTTTCTGC	2.66447	GTAAAAACTATATATA	TATATATAGTTTTTAC	2.76362	GCGAAAACTATATTCA	TGAATATAGTTTTCGC	0.176265	NA	NA	0.479402	0.106314	-0.149149	0.0415766
AAACTATC	GATAGTTT	3.82902	ACAAAAACTATCGTCG	CGACGATAGTTTTTGT	NA	CGCAAAACTATCCATA	TATGGATAGTTTTGCG	4.3185	AGTAAAACTATCCATC	GATGGATAGTTTTACT	1.85902	GCATAAACTATCACTT	AAGTGATAGTTTATGC	5.69306	GCAGAAACTATCAGTA	TACTGATAGTTTCTGC	3.10966	GTAAAAACTATCTATA	TATAGATAGTTTTTAC	NA	GCGAAAACTATCTTCA	TGAAGATAGTTTTCGC	0.0361112	NA	-1.191	-0.809064	1.36339	0.264744	NA
AAACTATG	CATAGTTT	3.82776	ACAAAAACTATGGTCG	CGACCATAGTTTTTGT	NA	CGCAAAACTATGCATA	TATGCATAGTTTTGCG	5.3185	AGTAAAACTATGCATC	GATGCATAGTTTTACT	3.77364	GCATAAACTATGACTT	AAGTCATAGTTTATGC	4.16816	GCAGAAACTATGAGTA	TACTCATAGTTTCTGC	3.6866	GTAAAAACTATGTATA	TATACATAGTTTTTAC	3.62665	GCGAAAACTATGTTCA	TGAACATAGTTTTCGC	0.034314	NA	-0.0136127	1.12516	0.0922029	0.801131	0.937388
AAACTATT	AATAGTTT	4.12488	ACAAAAACTATTGTCG	CGACAATAGTTTTTGT	3.67279	CGCAAAACTATTCATA	TATGAATAGTTTTGCG	5.48265	AGTAAAACTATTCATC	GATGAATAGTTTTACT	1.45326	GCATAAACTATTACTT	AAGTAATAGTTTATGC	2.81001	GCAGAAACTATTAGTA	TACTAATAGTTTCTGC	3.66484	GTAAAAACTATTTATA	TATAAATAGTTTTTAC	1.6748	GCGAAAACTATTTTCA	TGAAAATAGTTTTCGC	0.45771	-1.60846	0.179656	-1.21897	-1.03997	0.780901	-1.0886
AAACTCAA	TTGAGTTT	4.027	ACAAAAACTCAAGTCG	CGACTTGAGTTTTTGT	NA	CGCAAAACTCAACATA	TATGTTGAGTTTTGCG	4.61547	AGTAAAACTCAACATC	GATGTTGAGTTTTACT	1.11106	GCATAAACTCAAACTT	AAGTTTGAGTTTATGC	3.76688	GCAGAAACTCAAAGTA	TACTTTGAGTTTCTGC	1.22676	GTAAAAACTCAATATA	TATATTGAGTTTTTAC	NA	GCGAAAACTCAATTCA	TGAATTGAGTTTTCGC	0.318231	NA	-0.841351	-1.56468	-0.242307	-1.4858	NA
AAACTCAC	GTGAGTTT	5.37677	ACAAAAACTCACGTCG	CGACGTGAGTTTTTGT	NA	CGCAAAACTCACCATA	TATGGTGAGTTTTGCG	NA	AGTAAAACTCACCATC	GATGGTGAGTTTTACT	NA	GCATAAACTCACACTT	AAGTGTGAGTTTATGC	NA	GCAGAAACTCACAGTA	TACTGTGAGTTTCTGC	NA	GTAAAAACTCACTATA	TATAGTGAGTTTTTAC	NA	GCGAAAACTCACTTCA	TGAAGTGAGTTTTCGC	2.24165	NA	NA	NA	NA	NA	NA
AAACTCAG	CTGAGTTT	NA	ACAAAAACTCAGGTCG	CGACCTGAGTTTTTGT	NA	CGCAAAACTCAGCATA	TATGCTGAGTTTTGCG	5.23493	AGTAAAACTCAGCATC	GATGCTGAGTTTTACT	2.58784	GCATAAACTCAGACTT	AAGTCTGAGTTTATGC	5.22187	GCAGAAACTCAGAGTA	TACTCTGAGTTTCTGC	3.68767	GTAAAAACTCAGTATA	TATACTGAGTTTTTAC	NA	GCGAAAACTCAGTTCA	TGAACTGAGTTTTCGC	NA	NA	-0.112009	-0.0727847	0.970596	0.802128	NA
AAACTCAT	ATGAGTTT	4.31274	ACAAAAACTCATGTCG	CGACATGAGTTTTTGT	NA	CGCAAAACTCATCATA	TATGATGAGTTTTGCG	5.21984	AGTAAAACTCATCATC	GATGATGAGTTTTACT	2.99317	GCATAAACTCATACTT	AAGTATGAGTTTATGC	4.79358	GCAGAAACTCATAGTA	TACTATGAGTTTCTGC	NA	GTAAAAACTCATTATA	TATAATGAGTTTTTAC	NA	GCGAAAACTCATTTCA	TGAAATGAGTTTTCGC	0.725401	NA	-0.129775	0.336693	0.613563	NA	NA
AAACTCCA	TGGAGTTT	2.89886	ACAAAAACTCCAGTCG	CGACTGGAGTTTTTGT	NA	CGCAAAACTCCACATA	TATGTGGAGTTTTGCG	NA	AGTAAAACTCCACATC	GATGTGGAGTTTTACT	NA	GCATAAACTCCAACTT	AAGTTGGAGTTTATGC	1.84109	GCAGAAACTCCAAGTA	TACTTGGAGTTTCTGC	NA	GTAAAAACTCCATATA	TATATGGAGTTTTTAC	NA	GCGAAAACTCCATTCA	TGAATGGAGTTTTCGC	-1.28937	NA	NA	NA	-1.84767	NA	NA
AAACTCCC	GGGAGTTT	2.61967	ACAAAAACTCCCGTCG	CGACGGGAGTTTTTGT	NA	CGCAAAACTCCCCATA	TATGGGGAGTTTTGCG	2.90827	AGTAAAACTCCCCATC	GATGGGGAGTTTTACT	NA	GCATAAACTCCCACTT	AAGTGGGAGTTTATGC	2.70869	GCAGAAACTCCCAGTA	TACTGGGAGTTTCTGC	NA	GTAAAAACTCCCTATA	TATAGGGAGTTTTTAC	NA	GCGAAAACTCCCTTCA	TGAAGGGAGTTTTCGC	-1.68722	NA	-2.85138	NA	-1.12443	NA	NA
AAACTCCG	CGGAGTTT	3.79239	ACAAAAACTCCGGTCG	CGACCGGAGTTTTTGT	NA	CGCAAAACTCCGCATA	TATGCGGAGTTTTGCG	3.3591	AGTAAAACTCCGCATC	GATGCGGAGTTTTACT	NA	GCATAAACTCCGACTT	AAGTCGGAGTTTATGC	1.63039	GCAGAAACTCCGAGTA	TACTCGGAGTTTCTGC	1.46906	GTAAAAACTCCGTATA	TATACGGAGTTTTTAC	NA	GCGAAAACTCCGTTCA	TGAACGGAGTTTTCGC	-0.0160856	NA	-2.32058	NA	-2.02331	-1.26053	NA
AAACTCCT	AGGAGTTT	1.8938	ACAAAAACTCCTGTCG	CGACAGGAGTTTTTGT	NA	CGCAAAACTCCTCATA	TATGAGGAGTTTTGCG	3.3841	AGTAAAACTCCTCATC	GATGAGGAGTTTTACT	NA	GCATAAACTCCTACTT	AAGTAGGAGTTTATGC	NA	GCAGAAACTCCTAGTA	TACTAGGAGTTTCTGC	NA	GTAAAAACTCCTTATA	TATAAGGAGTTTTTAC	NA	GCGAAAACTCCTTTCA	TGAAAGGAGTTTTCGC	-2.72158	NA	-2.29115	NA	NA	NA	NA
AAACTCGA	TCGAGTTT	4.51692	ACAAAAACTCGAGTCG	CGACTCGAGTTTTTGT	NA	CGCAAAACTCGACATA	TATGTCGAGTTTTGCG	4.92468	AGTAAAACTCGACATC	GATGTCGAGTTTTACT	2.66356	GCATAAACTCGAACTT	AAGTTCGAGTTTATGC	3.02639	GCAGAAACTCGAAGTA	TACTTCGAGTTTCTGC	3.97387	GTAAAAACTCGATATA	TATATCGAGTTTTTAC	NA	GCGAAAACTCGATTCA	TGAATCGAGTTTTCGC	1.01636	NA	-0.477292	0.00371526	-0.859586	1.06821	NA
AAACTCGC	GCGAGTTT	4.41321	ACAAAAACTCGCGTCG	CGACGCGAGTTTTTGT	4.91603	CGCAAAACTCGCCATA	TATGGCGAGTTTTGCG	5.07692	AGTAAAACTCGCCATC	GATGGCGAGTTTTACT	2.10536	GCATAAACTCGCACTT	AAGTGCGAGTTTATGC	NA	GCAGAAACTCGCAGTA	TACTGCGAGTTTCTGC	3.44801	GTAAAAACTCGCTATA	TATAGCGAGTTTTTAC	NA	GCGAAAACTCGCTTCA	TGAAGCGAGTTTTCGC	0.868578	0.0479755	-0.298049	-0.560199	NA	0.57931	NA
AAACTCGG	CCGAGTTT	3.86775	ACAAAAACTCGGGTCG	CGACCCGAGTTTTTGT	NA	CGCAAAACTCGGCATA	TATGCCGAGTTTTGCG	5.11849	AGTAAAACTCGGCATC	GATGCCGAGTTTTACT	1.25451	GCATAAACTCGGACTT	AAGTCCGAGTTTATGC	4.08867	GCAGAAACTCGGAGTA	TACTCCGAGTTTCTGC	2.48145	GTAAAAACTCGGTATA	TATACCGAGTTTTTAC	NA	GCGAAAACTCGGTTCA	TGAACCGAGTTTTCGC	0.0913002	NA	-0.249109	-1.41976	0.0259438	-0.319309	NA
AAACTCGT	ACGAGTTT	3.72268	ACAAAAACTCGTGTCG	CGACACGAGTTTTTGT	NA	CGCAAAACTCGTCATA	TATGACGAGTTTTGCG	4.68179	AGTAAAACTCGTCATC	GATGACGAGTTTTACT	1.73308	GCATAAACTCGTACTT	AAGTACGAGTTTATGC	5.01344	GCAGAAACTCGTAGTA	TACTACGAGTTTCTGC	1.93455	GTAAAAACTCGTTATA	TATAACGAGTTTTTAC	NA	GCGAAAACTCGTTTCA	TGAAACGAGTTTTCGC	-0.115431	NA	-0.763273	-0.936286	0.796841	-0.827765	NA
AAACTCTA	TAGAGTTT	4.20442	ACAAAAACTCTAGTCG	CGACTAGAGTTTTTGT	NA	CGCAAAACTCTACATA	TATGTAGAGTTTTGCG	3.54406	AGTAAAACTCTACATC	GATGTAGAGTTTTACT	1.20694	GCATAAACTCTAACTT	AAGTTAGAGTTTATGC	3.99794	GCAGAAACTCTAAGTA	TACTTAGAGTTTCTGC	3.32665	GTAAAAACTCTATATA	TATATAGAGTTTTTAC	NA	GCGAAAACTCTATTCA	TGAATAGAGTTTTCGC	0.571055	NA	-2.10282	-1.46782	-0.0496929	0.466484	NA
AAACTCTC	GAGAGTTT	4.25165	ACAAAAACTCTCGTCG	CGACGAGAGTTTTTGT	NA	CGCAAAACTCTCCATA	TATGGAGAGTTTTGCG	3.90199	AGTAAAACTCTCCATC	GATGGAGAGTTTTACT	1.09756	GCATAAACTCTCACTT	AAGTGAGAGTTTATGC	NA	GCAGAAACTCTCAGTA	TACTGAGAGTTTCTGC	NA	GTAAAAACTCTCTATA	TATAGAGAGTTTTTAC	NA	GCGAAAACTCTCTTCA	TGAAGAGAGTTTTCGC	0.63835	NA	-1.6814	-1.57832	NA	NA	NA
AAACTCTG	CAGAGTTT	3.92819	ACAAAAACTCTGGTCG	CGACCAGAGTTTTTGT	1.74068	CGCAAAACTCTGCATA	TATGCAGAGTTTTGCG	4.10039	AGTAAAACTCTGCATC	GATGCAGAGTTTTACT	1.84113	GCATAAACTCTGACTT	AAGTCAGAGTTTATGC	5.4823	GCAGAAACTCTGAGTA	TACTCAGAGTTTCTGC	2.79541	GTAAAAACTCTGTATA	TATACAGAGTTTTTAC	NA	GCGAAAACTCTGTTCA	TGAACAGAGTTTTCGC	0.177417	-4.18272	-1.4478	-0.827135	1.18769	-0.0274178	NA
AAACTCTT	AAGAGTTT	3.85952	ACAAAAACTCTTGTCG	CGACAAGAGTTTTTGT	NA	CGCAAAACTCTTCATA	TATGAAGAGTTTTGCG	3.74968	AGTAAAACTCTTCATC	GATGAAGAGTTTTACT	1.04233	GCATAAACTCTTACTT	AAGTAAGAGTTTATGC	3.91641	GCAGAAACTCTTAGTA	TACTAAGAGTTTCTGC	3.34678	GTAAAAACTCTTTATA	TATAAAGAGTTTTTAC	NA	GCGAAAACTCTTTTCA	TGAAAAGAGTTTTCGC	0.0795671	NA	-1.86073	-1.63411	-0.117652	0.485197	NA
AAACTGAA	TTCAGTTT	3.69347	ACAAAAACTGAAGTCG	CGACTTCAGTTTTTGT	NA	CGCAAAACTGAACATA	TATGTTCAGTTTTGCG	5.63876	AGTAAAACTGAACATC	GATGTTCAGTTTTACT	2.46679	GCATAAACTGAAACTT	AAGTTTCAGTTTATGC	4.38937	GCAGAAACTGAAAGTA	TACTTTCAGTTTCTGC	3.19822	GTAAAAACTGAATATA	TATATTCAGTTTTTAC	2.89816	GCGAAAACTGAATTCA	TGAATTCAGTTTTCGC	-0.157055	NA	0.363452	-0.195075	0.276607	0.347076	0.181225
AAACTGAC	GTCAGTTT	4.75725	ACAAAAACTGACGTCG	CGACGTCAGTTTTTGT	NA	CGCAAAACTGACCATA	TATGGTCAGTTTTGCG	5.72136	AGTAAAACTGACCATC	GATGGTCAGTTTTACT	1.92917	GCATAAACTGACACTT	AAGTGTCAGTTTATGC	4.99111	GCAGAAACTGACAGTA	TACTGTCAGTTTCTGC	NA	GTAAAAACTGACTATA	TATAGTCAGTTTTTAC	NA	GCGAAAACTGACTTCA	TGAAGTCAGTTTTCGC	1.35883	NA	0.460703	-0.738192	0.778229	NA	NA
AAACTGAG	CTCAGTTT	4.15108	ACAAAAACTGAGGTCG	CGACCTCAGTTTTTGT	NA	CGCAAAACTGAGCATA	TATGCTCAGTTTTGCG	5.32075	AGTAAAACTGAGCATC	GATGCTCAGTTTTACT	3.08132	GCATAAACTGAGACTT	AAGTCTCAGTTTATGC	5.00775	GCAGAAACTGAGAGTA	TACTCTCAGTTTCTGC	2.95682	GTAAAAACTGAGTATA	TATACTCAGTTTTTAC	2.62848	GCGAAAACTGAGTTCA	TGAACTCAGTTTTCGC	0.495035	NA	-0.0109642	0.425745	0.792104	0.122649	-0.0986898
AAACTGAT	ATCAGTTT	4.06186	ACAAAAACTGATGTCG	CGACATCAGTTTTTGT	4.57946	CGCAAAACTGATCATA	TATGATCAGTTTTGCG	5.63621	AGTAAAACTGATCATC	GATGATCAGTTTTACT	3.05284	GCATAAACTGATACTT	AAGTATCAGTTTATGC	6.4751	GCAGAAACTGATAGTA	TACTATCAGTTTCTGC	2.78918	GTAAAAACTGATTATA	TATAATCAGTTTTTAC	NA	GCGAAAACTGATTTCA	TGAAATCAGTTTTCGC	0.367901	-0.400457	0.360455	0.396976	2.0153	-0.0332054	NA
AAACTGCA	TGCAGTTT	2.98677	ACAAAAACTGCAGTCG	CGACTGCAGTTTTTGT	4.10318	CGCAAAACTGCACATA	TATGTGCAGTTTTGCG	4.60617	AGTAAAACTGCACATC	GATGTGCAGTTTTACT	2.03409	GCATAAACTGCAACTT	AAGTTGCAGTTTATGC	2.72688	GCAGAAACTGCAAGTA	TACTTGCAGTTTCTGC	2.86668	GTAAAAACTGCATATA	TATATGCAGTTTTTAC	NA	GCGAAAACTGCATTCA	TGAATGCAGTTTTCGC	-1.1641	-1.03503	-0.852302	-0.632203	-1.10927	0.0388496	NA
AAACTGCC	GGCAGTTT	3.90772	ACAAAAACTGCCGTCG	CGACGGCAGTTTTTGT	NA	CGCAAAACTGCCCATA	TATGGGCAGTTTTGCG	5.15154	AGTAAAACTGCCCATC	GATGGGCAGTTTTACT	2.39	GCATAAACTGCCACTT	AAGTGGCAGTTTATGC	4.8924	GCAGAAACTGCCAGTA	TACTGGCAGTTTCTGC	2.78449	GTAAAAACTGCCTATA	TATAGGCAGTTTTTAC	NA	GCGAAAACTGCCTTCA	TGAAGGCAGTTTTCGC	0.148248	NA	-0.210191	-0.272646	0.695947	-0.0375656	NA
AAACTGCG	CGCAGTTT	3.75425	ACAAAAACTGCGGTCG	CGACCGCAGTTTTTGT	5.17123	CGCAAAACTGCGCATA	TATGCGCAGTTTTGCG	5.50792	AGTAAAACTGCGCATC	GATGCGCAGTTTTACT	2.41115	GCATAAACTGCGACTT	AAGTCGCAGTTTATGC	4.96394	GCAGAAACTGCGAGTA	TACTCGCAGTTTCTGC	3.28047	GTAAAAACTGCGTATA	TATACGCAGTTTTTAC	2.13675	GCGAAAACTGCGTTCA	TGAACGCAGTTTTCGC	-0.0704461	0.387982	0.209409	-0.251279	0.755584	0.423549	-0.609102
AAACTGCT	AGCAGTTT	4.21575	ACAAAAACTGCTGTCG	CGACAGCAGTTTTTGT	4.59281	CGCAAAACTGCTCATA	TATGAGCAGTTTTGCG	6.15568	AGTAAAACTGCTCATC	GATGAGCAGTTTTACT	2.77127	GCATAAACTGCTACTT	AAGTAGCAGTTTATGC	NA	GCAGAAACTGCTAGTA	TACTAGCAGTTTCTGC	3.15444	GTAAAAACTGCTTATA	TATAAGCAGTTTTTAC	2.4675	GCGAAAACTGCTTTCA	TGAAAGCAGTTTTCGC	0.587198	-0.382666	0.972068	0.112526	NA	0.306377	-0.265791
AAACTGGA	TCCAGTTT	3.34376	ACAAAAACTGGAGTCG	CGACTCCAGTTTTTGT	NA	CGCAAAACTGGACATA	TATGTCCAGTTTTGCG	5.34044	AGTAAAACTGGACATC	GATGTCCAGTTTTACT	2.31048	GCATAAACTGGAACTT	AAGTTCCAGTTTATGC	5.40771	GCAGAAACTGGAAGTA	TACTTCCAGTTTCTGC	3.2054	GTAAAAACTGGATATA	TATATCCAGTTTTTAC	NA	GCGAAAACTGGATTCA	TGAATCCAGTTTTCGC	-0.655392	NA	0.0122156	-0.352978	1.12552	0.353755	NA
AAACTGGC	GCCAGTTT	5.0418	ACAAAAACTGGCGTCG	CGACGCCAGTTTTTGT	4.91962	CGCAAAACTGGCCATA	TATGGCCAGTTTTGCG	5.75953	AGTAAAACTGGCCATC	GATGGCCAGTTTTACT	1.63375	GCATAAACTGGCACTT	AAGTGCCAGTTTATGC	3.63845	GCAGAAACTGGCAGTA	TACTGCCAGTTTCTGC	2.31108	GTAAAAACTGGCTATA	TATAGCCAGTTTTTAC	2.14684	GCGAAAACTGGCTTCA	TGAAGCCAGTTTTCGC	1.76431	0.0527504	0.505652	-1.03664	-0.349367	-0.477698	-0.598628
AAACTGGG	CCCAGTTT	4.4302	ACAAAAACTGGGGTCG	CGACCCCAGTTTTTGT	5.31418	CGCAAAACTGGGCATA	TATGCCCAGTTTTGCG	5.92695	AGTAAAACTGGGCATC	GATGCCCAGTTTTACT	2.74651	GCATAAACTGGGACTT	AAGTCCCAGTTTATGC	4.0146	GCAGAAACTGGGAGTA	TACTCCCAGTTTCTGC	2.7328	GTAAAAACTGGGTATA	TATACCCAGTTTTTAC	1.24715	GCGAAAACTGGGTTCA	TGAACCCAGTTTTCGC	0.892782	0.578443	0.70276	0.0875146	-0.0358027	-0.0856262	-1.53249
AAACTGGT	ACCAGTTT	4.20445	ACAAAAACTGGTGTCG	CGACACCAGTTTTTGT	5.39986	CGCAAAACTGGTCATA	TATGACCAGTTTTGCG	5.79539	AGTAAAACTGGTCATC	GATGACCAGTTTTACT	0.946485	GCATAAACTGGTACTT	AAGTACCAGTTTATGC	3.25698	GCAGAAACTGGTAGTA	TACTACCAGTTTCTGC	NA	GTAAAAACTGGTTATA	TATAACCAGTTTTTAC	1.60688	GCGAAAACTGGTTTCA	TGAAACCAGTTTTCGC	0.571098	0.692609	0.54787	-1.73094	-0.667368	NA	-1.1591
AAACTGTA	TACAGTTT	3.83896	ACAAAAACTGTAGTCG	CGACTACAGTTTTTGT	4.32613	CGCAAAACTGTACATA	TATGTACAGTTTTGCG	6.00488	AGTAAAACTGTACATC	GATGTACAGTTTTACT	1.1213	GCATAAACTGTAACTT	AAGTTACAGTTTATGC	4.51177	GCAGAAACTGTAAGTA	TACTTACAGTTTCTGC	2.74356	GTAAAAACTGTATATA	TATATACAGTTTTTAC	2.22675	GCGAAAACTGTATTCA	TGAATACAGTTTTCGC	0.0502713	-0.737982	0.794515	-1.55433	0.378645	-0.075621	-0.515683
AAACTGTC	GACAGTTT	4.18192	ACAAAAACTGTCGTCG	CGACGACAGTTTTTGT	4.79461	CGCAAAACTGTCCATA	TATGGACAGTTTTGCG	5.68768	AGTAAAACTGTCCATC	GATGGACAGTTTTACT	1.90786	GCATAAACTGTCACTT	AAGTGACAGTTTATGC	4.32751	GCAGAAACTGTCAGTA	TACTGACAGTTTCTGC	NA	GTAAAAACTGTCTATA	TATAGACAGTTTTTAC	NA	GCGAAAACTGTCTTCA	TGAAGACAGTTTTCGC	0.538984	-0.113808	0.421051	-0.759717	0.225047	NA	NA
AAACTGTG	CACAGTTT	4.41594	ACAAAAACTGTGGTCG	CGACCACAGTTTTTGT	4.84411	CGCAAAACTGTGCATA	TATGCACAGTTTTGCG	5.58882	AGTAAAACTGTGCATC	GATGCACAGTTTTACT	2.83035	GCATAAACTGTGACTT	AAGTCACAGTTTATGC	5.71989	GCAGAAACTGTGAGTA	TACTCACAGTTTCTGC	2.29517	GTAAAAACTGTGTATA	TATACACAGTTTTTAC	2.58558	GCGAAAACTGTGTTCA	TGAACACAGTTTTCGC	0.872465	-0.0478562	0.304652	0.172211	1.38575	-0.49249	-0.143225
AAACTGTT	AACAGTTT	3.93296	ACAAAAACTGTTGTCG	CGACAACAGTTTTTGT	5.87737	CGCAAAACTGTTCATA	TATGAACAGTTTTGCG	5.5655	AGTAAAACTGTTCATC	GATGAACAGTTTTACT	0.733793	GCATAAACTGTTACTT	AAGTAACAGTTTATGC	3.29354	GCAGAAACTGTTAGTA	TACTAACAGTTTCTGC	2.82968	GTAAAAACTGTTTATA	TATAAACAGTTTTTAC	2.19872	GCGAAAACTGTTTTCA	TGAAAACAGTTTTCGC	0.184219	1.32881	0.277203	-1.9458	-0.636886	0.00444371	-0.544777
AAACTTAA	TTAAGTTT	4.3698	ACAAAAACTTAAGTCG	CGACTTAAGTTTTTGT	NA	CGCAAAACTTAACATA	TATGTTAAGTTTTGCG	4.44288	AGTAAAACTTAACATC	GATGTTAAGTTTTACT	2.48907	GCATAAACTTAAACTT	AAGTTTAAGTTTATGC	3.20307	GCAGAAACTTAAAGTA	TACTTTAAGTTTCTGC	1.41481	GTAAAAACTTAATATA	TATATTAAGTTTTTAC	2.78449	GCGAAAACTTAATTCA	TGAATTAAGTTTTCGC	0.806722	NA	-1.04456	-0.172566	-0.712309	-1.31097	0.063243
AAACTTAC	GTAAGTTT	3.89567	ACAAAAACTTACGTCG	CGACGTAAGTTTTTGT	NA	CGCAAAACTTACCATA	TATGGTAAGTTTTGCG	4.90908	AGTAAAACTTACCATC	GATGGTAAGTTTTACT	3.48167	GCATAAACTTACACTT	AAGTGTAAGTTTATGC	3.46985	GCAGAAACTTACAGTA	TACTGTAAGTTTCTGC	2.04642	GTAAAAACTTACTATA	TATAGTAAGTTTTTAC	1.42825	GCGAAAACTTACTTCA	TGAAGTAAGTTTTCGC	0.13108	NA	-0.495663	0.830198	-0.489911	-0.723757	-1.34451
AAACTTAG	CTAAGTTT	3.84445	ACAAAAACTTAGGTCG	CGACCTAAGTTTTTGT	NA	CGCAAAACTTAGCATA	TATGCTAAGTTTTGCG	4.91249	AGTAAAACTTAGCATC	GATGCTAAGTTTTACT	0.489937	GCATAAACTTAGACTT	AAGTCTAAGTTTATGC	4.69673	GCAGAAACTTAGAGTA	TACTCTAAGTTTCTGC	3.43541	GTAAAAACTTAGTATA	TATACTAAGTTTTTAC	3.35505	GCGAAAACTTAGTTCA	TGAACTAAGTTTTCGC	0.0580886	NA	-0.49164	-2.19216	0.53283	0.567597	0.655472
AAACTTAT	ATAAGTTT	3.83363	ACAAAAACTTATGTCG	CGACATAAGTTTTTGT	NA	CGCAAAACTTATCATA	TATGATAAGTTTTGCG	4.34052	AGTAAAACTTATCATC	GATGATAAGTTTTACT	2.34436	GCATAAACTTATACTT	AAGTATAAGTTTATGC	3.86434	GCAGAAACTTATAGTA	TACTATAAGTTTCTGC	3.40076	GTAAAAACTTATTATA	TATAATAAGTTTTTAC	2.50516	GCGAAAACTTATTTCA	TGAAATAAGTTTTCGC	0.0426767	NA	-1.16507	-0.318751	-0.161064	0.535386	-0.226697
AAACTTCA	TGAAGTTT	2.90949	ACAAAAACTTCAGTCG	CGACTGAAGTTTTTGT	NA	CGCAAAACTTCACATA	TATGTGAAGTTTTGCG	NA	AGTAAAACTTCACATC	GATGTGAAGTTTTACT	NA	GCATAAACTTCAACTT	AAGTTGAAGTTTATGC	3.29199	GCAGAAACTTCAAGTA	TACTTGAAGTTTCTGC	3.19016	GTAAAAACTTCATATA	TATATGAAGTTTTTAC	NA	GCGAAAACTTCATTCA	TGAATGAAGTTTTCGC	-1.27423	NA	NA	NA	-0.638185	0.339591	NA
AAACTTCC	GGAAGTTT	4.88767	ACAAAAACTTCCGTCG	CGACGGAAGTTTTTGT	NA	CGCAAAACTTCCCATA	TATGGGAAGTTTTGCG	4.6595	AGTAAAACTTCCCATC	GATGGGAAGTTTTACT	NA	GCATAAACTTCCACTT	AAGTGGAAGTTTATGC	5.10469	GCAGAAACTTCCAGTA	TACTGGAAGTTTCTGC	NA	GTAAAAACTTCCTATA	TATAGGAAGTTTTTAC	2.08426	GCGAAAACTTCCTTCA	TGAAGGAAGTTTTCGC	1.54468	NA	-0.789508	NA	0.872908	NA	-0.663586
AAACTTCG	CGAAGTTT	3.81857	ACAAAAACTTCGGTCG	CGACCGAAGTTTTTGT	3.09373	CGCAAAACTTCGCATA	TATGCGAAGTTTTGCG	3.10989	AGTAAAACTTCGCATC	GATGCGAAGTTTTACT	1.48075	GCATAAACTTCGACTT	AAGTCGAAGTTTATGC	3.83595	GCAGAAACTTCGAGTA	TACTCGAAGTTTCTGC	3.55315	GTAAAAACTTCGTATA	TATACGAAGTTTTTAC	1.90565	GCGAAAACTTCGTTCA	TGAACGAAGTTTTCGC	0.0212215	-2.37997	-2.61399	-1.1912	-0.184731	0.677064	-0.84898
AAACTTCT	AGAAGTTT	4.00595	ACAAAAACTTCTGTCG	CGACAGAAGTTTTTGT	NA	CGCAAAACTTCTCATA	TATGAGAAGTTTTGCG	4.13698	AGTAAAACTTCTCATC	GATGAGAAGTTTTACT	1.75553	GCATAAACTTCTACTT	AAGTAGAAGTTTATGC	4.56958	GCAGAAACTTCTAGTA	TACTAGAAGTTTCTGC	NA	GTAAAAACTTCTTATA	TATAAGAAGTTTTTAC	2.884	GCGAAAACTTCTTTCA	TGAAAGAAGTTTTCGC	0.288226	NA	-1.40471	-0.913615	0.426838	NA	0.166528
AAACTTGA	TCAAGTTT	3.64154	ACAAAAACTTGAGTCG	CGACTCAAGTTTTTGT	4.00534	CGCAAAACTTGACATA	TATGTCAAGTTTTGCG	4.42487	AGTAAAACTTGACATC	GATGTCAAGTTTTACT	2.3523	GCATAAACTTGAACTT	AAGTTCAAGTTTATGC	4.6873	GCAGAAACTTGAAGTA	TACTTCAAGTTTCTGC	3.71301	GTAAAAACTTGATATA	TATATCAAGTTTTTAC	1.31453	GCGAAAACTTGATTCA	TGAATCAAGTTTTCGC	-0.231051	-1.16539	-1.06576	-0.310731	0.524973	0.825688	-1.46255
AAACTTGC	GCAAGTTT	3.52151	ACAAAAACTTGCGTCG	CGACGCAAGTTTTTGT	4.81458	CGCAAAACTTGCCATA	TATGGCAAGTTTTGCG	5.82094	AGTAAAACTTGCCATC	GATGGCAAGTTTTACT	2.54551	GCATAAACTTGCACTT	AAGTGCAAGTTTATGC	2.10257	GCAGAAACTTGCAGTA	TACTGCAAGTTTCTGC	NA	GTAAAAACTTGCTATA	TATAGCAAGTTTTTAC	1.64567	GCGAAAACTTGCTTCA	TGAAGCAAGTTTTCGC	-0.402097	-0.0871979	0.577951	-0.115544	-1.6297	NA	-1.11883
AAACTTGG	CCAAGTTT	4.13507	ACAAAAACTTGGGTCG	CGACCCAAGTTTTTGT	3.013	CGCAAAACTTGGCATA	TATGCCAAGTTTTGCG	5.37575	AGTAAAACTTGGCATC	GATGCCAAGTTTTACT	0.484347	GCATAAACTTGGACTT	AAGTCCAAGTTTATGC	3.76858	GCAGAAACTTGGAGTA	TACTCCAAGTTTCTGC	1.3903	GTAAAAACTTGGTATA	TATACCAAGTTTTTAC	1.64381	GCGAAAACTTGGTTCA	TGAACCAAGTTTTCGC	0.472228	-2.48754	0.0537899	-2.1978	-0.240889	-1.33375	-1.12076
AAACTTGT	ACAAGTTT	3.80588	ACAAAAACTTGTGTCG	CGACACAAGTTTTTGT	5.39489	CGCAAAACTTGTCATA	TATGACAAGTTTTGCG	5.20809	AGTAAAACTTGTCATC	GATGACAAGTTTTACT	2.50907	GCATAAACTTGTACTT	AAGTACAAGTTTATGC	4.86342	GCAGAAACTTGTAGTA	TACTACAAGTTTCTGC	2.81039	GTAAAAACTTGTTATA	TATAACAAGTTTTTAC	1.84553	GCGAAAACTTGTTTCA	TGAAACAAGTTTTCGC	0.00312879	0.685981	-0.143614	-0.152361	0.671781	-0.0134923	-0.911378
AAACTTTA	TAAAGTTT	4.00176	ACAAAAACTTTAGTCG	CGACTAAAGTTTTTGT	4.4861	CGCAAAACTTTACATA	TATGTAAAGTTTTGCG	4.73154	AGTAAAACTTTACATC	GATGTAAAGTTTTACT	0.0844983	GCATAAACTTTAACTT	AAGTTAAAGTTTATGC	3.91515	GCAGAAACTTTAAGTA	TACTTAAAGTTTCTGC	3.31933	GTAAAAACTTTATATA	TATATAAAGTTTTTAC	1.96569	GCGAAAACTTTATTCA	TGAATAAAGTTTTCGC	0.282259	-0.524849	-0.704693	-2.60174	-0.118707	0.459681	-0.786654
AAACTTTC	GAAAGTTT	4.6814	ACAAAAACTTTCGTCG	CGACGAAAGTTTTTGT	NA	CGCAAAACTTTCCATA	TATGGAAAGTTTTGCG	4.18453	AGTAAAACTTTCCATC	GATGGAAAGTTTTACT	0.516492	GCATAAACTTTCACTT	AAGTGAAAGTTTATGC	4.1372	GCAGAAACTTTCAGTA	TACTGAAAGTTTCTGC	NA	GTAAAAACTTTCTATA	TATAGAAAGTTTTTAC	1.5778	GCGAAAACTTTCTTCA	TGAAGAAAGTTTTCGC	1.25075	NA	-1.34874	-2.16533	0.0663991	NA	-1.18927
AAACTTTG	CAAAGTTT	4.02213	ACAAAAACTTTGGTCG	CGACCAAAGTTTTTGT	NA	CGCAAAACTTTGCATA	TATGCAAAGTTTTGCG	4.62841	AGTAAAACTTTGCATC	GATGCAAAGTTTTACT	1.80469	GCATAAACTTTGACTT	AAGTCAAAGTTTATGC	4.09714	GCAGAAACTTTGAGTA	TACTCAAAGTTTCTGC	3.12411	GTAAAAACTTTGTATA	TATACAAAGTTTTTAC	2.58862	GCGAAAACTTTGTTCA	TGAACAAAGTTTTCGC	0.311291	NA	-0.826123	-0.863944	0.0330035	0.278184	-0.140064
AAACTTTT	AAAAGTTT	4.27811	ACAAAAACTTTTGTCG	CGACAAAAGTTTTTGT	5.562	CGCAAAACTTTTCATA	TATGAAAAGTTTTGCG	4.86593	AGTAAAACTTTTCATC	GATGAAAAGTTTTACT	1.02887	GCATAAACTTTTACTT	AAGTAAAAGTTTATGC	4.11009	GCAGAAACTTTTAGTA	TACTAAAAGTTTCTGC	3.63682	GTAAAAACTTTTTATA	TATAAAAAGTTTTTAC	0.793427	GCGAAAACTTTTTTCA	TGAAAAAAGTTTTCGC	0.676053	0.908632	-0.546466	-1.64771	0.0437998	0.75485	-2.00344
AAAGAAAA	TTTTCTTT	3.90415	ACAAAAAGAAAAGTCG	CGACTTTTCTTTTTGT	NA	CGCAAAAGAAAACATA	TATGTTTTCTTTTGCG	NA	AGTAAAAGAAAACATC	GATGTTTTCTTTTACT	2.60578	GCATAAAGAAAAACTT	AAGTTTTTCTTTATGC	NA	GCAGAAAGAAAAAGTA	TACTTTTTCTTTCTGC	NA	GTAAAAAGAAAATATA	TATATTTTCTTTTTAC	NA	GCGAAAAGAAAATTCA	TGAATTTTCTTTTCGC	0.143166	NA	NA	-0.0546636	NA	NA	NA
AAAGAAAC	GTTTCTTT	3.82675	ACAAAAAGAAACGTCG	CGACGTTTCTTTTTGT	NA	CGCAAAAGAAACCATA	TATGGTTTCTTTTGCG	NA	AGTAAAAGAAACCATC	GATGGTTTCTTTTACT	3.05757	GCATAAAGAAACACTT	AAGTGTTTCTTTATGC	NA	GCAGAAAGAAACAGTA	TACTGTTTCTTTCTGC	NA	GTAAAAAGAAACTATA	TATAGTTTCTTTTTAC	NA	GCGAAAAGAAACTTCA	TGAAGTTTCTTTTCGC	0.0328699	NA	NA	0.40176	NA	NA	NA
AAAGAAAG	CTTTCTTT	3.40057	ACAAAAAGAAAGGTCG	CGACCTTTCTTTTTGT	NA	CGCAAAAGAAAGCATA	TATGCTTTCTTTTGCG	3.57601	AGTAAAAGAAAGCATC	GATGCTTTCTTTTACT	1.8579	GCATAAAGAAAGACTT	AAGTCTTTCTTTATGC	NA	GCAGAAAGAAAGAGTA	TACTCTTTCTTTCTGC	NA	GTAAAAAGAAAGTATA	TATACTTTCTTTTTAC	0.74086	GCGAAAAGAAAGTTCA	TGAACTTTCTTTTCGC	-0.574429	NA	-2.0652	-0.810195	NA	NA	-2.058
AAAGAAAT	ATTTCTTT	3.78619	ACAAAAAGAAATGTCG	CGACATTTCTTTTTGT	NA	CGCAAAAGAAATCATA	TATGATTTCTTTTGCG	5.41861	AGTAAAAGAAATCATC	GATGATTTCTTTTACT	2.97633	GCATAAAGAAATACTT	AAGTATTTCTTTATGC	3.33127	GCAGAAAGAAATAGTA	TACTATTTCTTTCTGC	NA	GTAAAAAGAAATTATA	TATAATTTCTTTTTAC	NA	GCGAAAAGAAATTTCA	TGAAATTTCTTTTCGC	-0.0249304	NA	0.104256	0.319679	-0.605438	NA	NA
AAAGAACA	TGTTCTTT	4.16049	ACAAAAAGAACAGTCG	CGACTGTTCTTTTTGT	NA	CGCAAAAGAACACATA	TATGTGTTCTTTTGCG	4.91858	AGTAAAAGAACACATC	GATGTGTTCTTTTACT	2.61326	GCATAAAGAACAACTT	AAGTTGTTCTTTATGC	NA	GCAGAAAGAACAAGTA	TACTTGTTCTTTCTGC	3.90206	GTAAAAAGAACATATA	TATATGTTCTTTTTAC	3.30197	GCGAAAAGAACATTCA	TGAATGTTCTTTTCGC	0.508456	NA	-0.484472	-0.0471001	NA	1.00145	0.600373
AAAGAACC	GGTTCTTT	4.57705	ACAAAAAGAACCGTCG	CGACGGTTCTTTTTGT	NA	CGCAAAAGAACCCATA	TATGGGTTCTTTTGCG	5.32569	AGTAAAAGAACCCATC	GATGGGTTCTTTTACT	NA	GCATAAAGAACCACTT	AAGTGGTTCTTTATGC	NA	GCAGAAAGAACCAGTA	TACTGGTTCTTTCTGC	NA	GTAAAAAGAACCTATA	TATAGGTTCTTTTTAC	NA	GCGAAAAGAACCTTCA	TGAAGGTTCTTTTCGC	1.10204	NA	-0.00514535	NA	NA	NA	NA
AAAGAACG	CGTTCTTT	4.75904	ACAAAAAGAACGGTCG	CGACCGTTCTTTTTGT	NA	CGCAAAAGAACGCATA	TATGCGTTCTTTTGCG	5.50054	AGTAAAAGAACGCATC	GATGCGTTCTTTTACT	3.03837	GCATAAAGAACGACTT	AAGTCGTTCTTTATGC	NA	GCAGAAAGAACGAGTA	TACTCGTTCTTTCTGC	2.7892	GTAAAAAGAACGTATA	TATACGTTCTTTTTAC	2.58449	GCGAAAAGAACGTTCA	TGAACGTTCTTTTCGC	1.36139	NA	0.200717	0.382357	NA	-0.033189	-0.144351
AAAGAACT	AGTTCTTT	4.61041	ACAAAAAGAACTGTCG	CGACAGTTCTTTTTGT	NA	CGCAAAAGAACTCATA	TATGAGTTCTTTTGCG	5.14726	AGTAAAAGAACTCATC	GATGAGTTCTTTTACT	1.39311	GCATAAAGAACTACTT	AAGTAGTTCTTTATGC	NA	GCAGAAAGAACTAGTA	TACTAGTTCTTTCTGC	NA	GTAAAAAGAACTTATA	TATAAGTTCTTTTTAC	1.20022	GCGAAAAGAACTTTCA	TGAAAGTTCTTTTCGC	1.14958	NA	-0.215234	-1.27974	NA	NA	-1.5812
AAAGAAGA	TCTTCTTT	4.471	ACAAAAAGAAGAGTCG	CGACTCTTCTTTTTGT	NA	CGCAAAAGAAGACATA	TATGTCTTCTTTTGCG	4.74962	AGTAAAAGAAGACATC	GATGTCTTCTTTTACT	2.82989	GCATAAAGAAGAACTT	AAGTTCTTCTTTATGC	NA	GCAGAAAGAAGAAGTA	TACTTCTTCTTTCTGC	4.1165	GTAAAAAGAAGATATA	TATATCTTCTTTTTAC	NA	GCGAAAAGAAGATTCA	TGAATCTTCTTTTCGC	0.950922	NA	-0.683412	0.171745	NA	1.20081	NA
AAAGAAGC	GCTTCTTT	4.58429	ACAAAAAGAAGCGTCG	CGACGCTTCTTTTTGT	NA	CGCAAAAGAAGCCATA	TATGGCTTCTTTTGCG	4.53407	AGTAAAAGAAGCCATC	GATGGCTTCTTTTACT	2.09932	GCATAAAGAAGCACTT	AAGTGCTTCTTTATGC	NA	GCAGAAAGAAGCAGTA	TACTGCTTCTTTCTGC	NA	GTAAAAAGAAGCTATA	TATAGCTTCTTTTTAC	2.65001	GCGAAAAGAAGCTTCA	TGAAGCTTCTTTTCGC	1.11237	NA	-0.937193	-0.566302	NA	NA	-0.0763477
AAAGAAGG	CCTTCTTT	4.26378	ACAAAAAGAAGGGTCG	CGACCCTTCTTTTTGT	NA	CGCAAAAGAAGGCATA	TATGCCTTCTTTTGCG	5.17109	AGTAAAAGAAGGCATC	GATGCCTTCTTTTACT	NA	GCATAAAGAAGGACTT	AAGTCCTTCTTTATGC	2.0315	GCAGAAAGAAGGAGTA	TACTCCTTCTTTCTGC	NA	GTAAAAAGAAGGTATA	TATACCTTCTTTTTAC	NA	GCGAAAAGAAGGTTCA	TGAACCTTCTTTTCGC	0.655633	NA	-0.187171	NA	-1.68894	NA	NA
AAAGAAGT	ACTTCTTT	4.61872	ACAAAAAGAAGTGTCG	CGACACTTCTTTTTGT	NA	CGCAAAAGAAGTCATA	TATGACTTCTTTTGCG	3.77302	AGTAAAAGAAGTCATC	GATGACTTCTTTTACT	1.11527	GCATAAAGAAGTACTT	AAGTACTTCTTTATGC	4.12428	GCAGAAAGAAGTAGTA	TACTACTTCTTTCTGC	1.88949	GTAAAAAGAAGTTATA	TATAACTTCTTTTTAC	NA	GCGAAAAGAAGTTTCA	TGAAACTTCTTTTCGC	1.16143	NA	-1.83324	-1.56043	0.0556289	-0.869652	NA
AAAGAATA	TATTCTTT	5.04299	ACAAAAAGAATAGTCG	CGACTATTCTTTTTGT	NA	CGCAAAAGAATACATA	TATGTATTCTTTTGCG	6.25863	AGTAAAAGAATACATC	GATGTATTCTTTTACT	3.4679	GCATAAAGAATAACTT	AAGTTATTCTTTATGC	4.25105	GCAGAAAGAATAAGTA	TACTTATTCTTTCTGC	3.46795	GTAAAAAGAATATATA	TATATATTCTTTTTAC	3.07097	GCGAAAAGAATATTCA	TGAATATTCTTTTCGC	1.76602	NA	1.09328	0.816283	0.161306	0.597847	0.3606
AAAGAATC	GATTCTTT	5.11244	ACAAAAAGAATCGTCG	CGACGATTCTTTTTGT	NA	CGCAAAAGAATCCATA	TATGGATTCTTTTGCG	5.91002	AGTAAAAGAATCCATC	GATGGATTCTTTTACT	2.14767	GCATAAAGAATCACTT	AAGTGATTCTTTATGC	4.31576	GCAGAAAGAATCAGTA	TACTGATTCTTTCTGC	NA	GTAAAAAGAATCTATA	TATAGATTCTTTTTAC	1.90645	GCGAAAAGAATCTTCA	TGAAGATTCTTTTCGC	1.86498	NA	0.682826	-0.517457	0.215246	NA	-0.848146
AAAGAATG	CATTCTTT	3.86384	ACAAAAAGAATGGTCG	CGACCATTCTTTTTGT	NA	CGCAAAAGAATGCATA	TATGCATTCTTTTGCG	6.23139	AGTAAAAGAATGCATC	GATGCATTCTTTTACT	3.60266	GCATAAAGAATGACTT	AAGTCATTCTTTATGC	5.73211	GCAGAAAGAATGAGTA	TACTCATTCTTTCTGC	4.26959	GTAAAAAGAATGTATA	TATACATTCTTTTTAC	3.3655	GCGAAAAGAATGTTCA	TGAACATTCTTTTCGC	0.0857297	NA	1.0612	0.952423	1.39594	1.34314	0.666315
AAAGAATT	AATTCTTT	4.67462	ACAAAAAGAATTGTCG	CGACAATTCTTTTTGT	NA	CGCAAAAGAATTCATA	TATGAATTCTTTTGCG	6.00848	AGTAAAAGAATTCATC	GATGAATTCTTTTACT	3.12032	GCATAAAGAATTACTT	AAGTAATTCTTTATGC	3.31932	GCAGAAAGAATTAGTA	TACTAATTCTTTCTGC	3.90541	GTAAAAAGAATTTATA	TATAAATTCTTTTTAC	2.27903	GCGAAAAGAATTTTCA	TGAAAATTCTTTTCGC	1.24108	NA	0.798751	0.46515	-0.615399	1.00456	-0.461414
AAAGACAA	TTGTCTTT	4.452	ACAAAAAGACAAGTCG	CGACTTGTCTTTTTGT	NA	CGCAAAAGACAACATA	TATGTTGTCTTTTGCG	4.66819	AGTAAAAGACAACATC	GATGTTGTCTTTTACT	2.20111	GCATAAAGACAAACTT	AAGTTTGTCTTTATGC	3.50866	GCAGAAAGACAAAGTA	TACTTTGTCTTTCTGC	3.10416	GTAAAAAGACAATATA	TATATTGTCTTTTTAC	NA	GCGAAAAGACAATTCA	TGAATTGTCTTTTCGC	0.923854	NA	-0.779276	-0.463469	-0.457565	0.259635	NA
AAAGACAC	GTGTCTTT	4.84999	ACAAAAAGACACGTCG	CGACGTGTCTTTTTGT	NA	CGCAAAAGACACCATA	TATGGTGTCTTTTGCG	4.56265	AGTAAAAGACACCATC	GATGGTGTCTTTTACT	2.09656	GCATAAAGACACACTT	AAGTGTGTCTTTATGC	NA	GCAGAAAGACACAGTA	TACTGTGTCTTTCTGC	4.43039	GTAAAAAGACACTATA	TATAGTGTCTTTTTAC	NA	GCGAAAAGACACTTCA	TGAAGTGTCTTTTCGC	1.49099	NA	-0.903544	-0.569093	NA	1.49264	NA
AAAGACAG	CTGTCTTT	2.4187	ACAAAAAGACAGGTCG	CGACCTGTCTTTTTGT	5.27708	CGCAAAAGACAGCATA	TATGCTGTCTTTTGCG	5.48439	AGTAAAAGACAGCATC	GATGCTGTCTTTTACT	3.18136	GCATAAAGACAGACTT	AAGTCTGTCTTTATGC	NA	GCAGAAAGACAGAGTA	TACTCTGTCTTTCTGC	NA	GTAAAAAGACAGTATA	TATACTGTCTTTTTAC	NA	GCGAAAAGACAGTTCA	TGAACTGTCTTTTCGC	-1.9736	0.529021	0.181707	0.526808	NA	NA	NA
AAAGACAT	ATGTCTTT	4.94766	ACAAAAAGACATGTCG	CGACATGTCTTTTTGT	4.63176	CGCAAAAGACATCATA	TATGATGTCTTTTGCG	5.207	AGTAAAAGACATCATC	GATGATGTCTTTTACT	3.23285	GCATAAAGACATACTT	AAGTATGTCTTTATGC	NA	GCAGAAAGACATAGTA	TACTATGTCTTTCTGC	3.46374	GTAAAAAGACATTATA	TATAATGTCTTTTTAC	3.33722	GCGAAAAGACATTTCA	TGAAATGTCTTTTCGC	1.63017	-0.330781	-0.144895	0.578826	NA	0.593939	0.636966
AAAGACCA	TGGTCTTT	4.77587	ACAAAAAGACCAGTCG	CGACTGGTCTTTTTGT	NA	CGCAAAAGACCACATA	TATGTGGTCTTTTGCG	5.45939	AGTAAAAGACCACATC	GATGTGGTCTTTTACT	NA	GCATAAAGACCAACTT	AAGTTGGTCTTTATGC	NA	GCAGAAAGACCAAGTA	TACTTGGTCTTTCTGC	NA	GTAAAAAGACCATATA	TATATGGTCTTTTTAC	NA	GCGAAAAGACCATTCA	TGAATGGTCTTTTCGC	1.38537	NA	0.15227	NA	NA	NA	NA
AAAGACCC	GGGTCTTT	4.70455	ACAAAAAGACCCGTCG	CGACGGGTCTTTTTGT	NA	CGCAAAAGACCCCATA	TATGGGGTCTTTTGCG	5.69883	AGTAAAAGACCCCATC	GATGGGGTCTTTTACT	2.38235	GCATAAAGACCCACTT	AAGTGGGTCTTTATGC	4.18158	GCAGAAAGACCCAGTA	TACTGGGTCTTTCTGC	NA	GTAAAAAGACCCTATA	TATAGGGTCTTTTTAC	NA	GCGAAAAGACCCTTCA	TGAAGGGTCTTTTCGC	1.28373	NA	0.43418	-0.280378	0.103396	NA	NA
AAAGACCG	CGGTCTTT	4.04875	ACAAAAAGACCGGTCG	CGACCGGTCTTTTTGT	NA	CGCAAAAGACCGCATA	TATGCGGTCTTTTGCG	4.8395	AGTAAAAGACCGCATC	GATGCGGTCTTTTACT	0.631818	GCATAAAGACCGACTT	AAGTCGGTCTTTATGC	NA	GCAGAAAGACCGAGTA	TACTCGGTCTTTCTGC	NA	GTAAAAAGACCGTATA	TATACGGTCTTTTTAC	NA	GCGAAAAGACCGTTCA	TGAACGGTCTTTTCGC	0.349218	NA	-0.577582	-2.04882	NA	NA	NA
AAAGACCT	AGGTCTTT	4.20763	ACAAAAAGACCTGTCG	CGACAGGTCTTTTTGT	NA	CGCAAAAGACCTCATA	TATGAGGTCTTTTGCG	5.9257	AGTAAAAGACCTCATC	GATGAGGTCTTTTACT	NA	GCATAAAGACCTACTT	AAGTAGGTCTTTATGC	NA	GCAGAAAGACCTAGTA	TACTAGGTCTTTCTGC	NA	GTAAAAAGACCTTATA	TATAAGGTCTTTTTAC	NA	GCGAAAAGACCTTTCA	TGAAAGGTCTTTTCGC	0.575627	NA	0.701288	NA	NA	NA	NA
AAAGACGA	TCGTCTTT	4.4751	ACAAAAAGACGAGTCG	CGACTCGTCTTTTTGT	NA	CGCAAAAGACGACATA	TATGTCGTCTTTTGCG	5.43113	AGTAAAAGACGACATC	GATGTCGTCTTTTACT	NA	GCATAAAGACGAACTT	AAGTTCGTCTTTATGC	NA	GCAGAAAGACGAAGTA	TACTTCGTCTTTCTGC	NA	GTAAAAAGACGATATA	TATATCGTCTTTTTAC	NA	GCGAAAAGACGATTCA	TGAATCGTCTTTTCGC	0.956774	NA	0.118999	NA	NA	NA	NA
AAAGACGC	GCGTCTTT	4.53051	ACAAAAAGACGCGTCG	CGACGCGTCTTTTTGT	NA	CGCAAAAGACGCCATA	TATGGCGTCTTTTGCG	3.87815	AGTAAAAGACGCCATC	GATGGCGTCTTTTACT	2.00036	GCATAAAGACGCACTT	AAGTGCGTCTTTATGC	NA	GCAGAAAGACGCAGTA	TACTGCGTCTTTCTGC	4.24146	GTAAAAAGACGCTATA	TATAGCGTCTTTTTAC	1.24781	GCGAAAAGACGCTTCA	TGAAGCGTCTTTTCGC	1.03573	NA	-1.70946	-0.666278	NA	1.31699	-1.5318
AAAGACGG	CCGTCTTT	3.74426	ACAAAAAGACGGGTCG	CGACCCGTCTTTTTGT	4.68867	CGCAAAAGACGGCATA	TATGCCGTCTTTTGCG	5.3815	AGTAAAAGACGGCATC	GATGCCGTCTTTTACT	2.56167	GCATAAAGACGGACTT	AAGTCCGTCTTTATGC	NA	GCAGAAAGACGGAGTA	TACTCCGTCTTTCTGC	2.05772	GTAAAAAGACGGTATA	TATACCGTCTTTTTAC	NA	GCGAAAAGACGGTTCA	TGAACCGTCTTTTCGC	-0.0846699	-0.254954	0.0605658	-0.0992179	NA	-0.71325	NA
AAAGACGT	ACGTCTTT	4.37953	ACAAAAAGACGTGTCG	CGACACGTCTTTTTGT	NA	CGCAAAAGACGTCATA	TATGACGTCTTTTGCG	5.34932	AGTAAAAGACGTCATC	GATGACGTCTTTTACT	2.62319	GCATAAAGACGTACTT	AAGTACGTCTTTATGC	NA	GCAGAAAGACGTAGTA	TACTACGTCTTTCTGC	1.7012	GTAAAAAGACGTTATA	TATAACGTCTTTTTAC	1.17047	GCGAAAAGACGTTTCA	TGAAACGTCTTTTCGC	0.820587	NA	0.0226701	-0.0370742	NA	-1.04471	-1.61207
AAAGACTA	TAGTCTTT	4.02859	ACAAAAAGACTAGTCG	CGACTAGTCTTTTTGT	NA	CGCAAAAGACTACATA	TATGTAGTCTTTTGCG	4.93136	AGTAAAAGACTACATC	GATGTAGTCTTTTACT	NA	GCATAAAGACTAACTT	AAGTTAGTCTTTATGC	NA	GCAGAAAGACTAAGTA	TACTTAGTCTTTCTGC	NA	GTAAAAAGACTATATA	TATATAGTCTTTTTAC	1.48464	GCGAAAAGACTATTCA	TGAATAGTCTTTTCGC	0.320486	NA	-0.469424	NA	NA	NA	-1.28598
AAAGACTC	GAGTCTTT	4.55063	ACAAAAAGACTCGTCG	CGACGAGTCTTTTTGT	NA	CGCAAAAGACTCCATA	TATGGAGTCTTTTGCG	2.1866	AGTAAAAGACTCCATC	GATGGAGTCTTTTACT	1.75672	GCATAAAGACTCACTT	AAGTGAGTCTTTATGC	NA	GCAGAAAGACTCAGTA	TACTGAGTCTTTCTGC	3.43133	GTAAAAAGACTCTATA	TATAGAGTCTTTTTAC	NA	GCGAAAAGACTCTTCA	TGAAGAGTCTTTTCGC	1.0644	NA	-3.70107	-0.912411	NA	0.563804	NA
AAAGACTG	CAGTCTTT	4.12504	ACAAAAAGACTGGTCG	CGACCAGTCTTTTTGT	NA	CGCAAAAGACTGCATA	TATGCAGTCTTTTGCG	5.64233	AGTAAAAGACTGCATC	GATGCAGTCTTTTACT	1.99421	GCATAAAGACTGACTT	AAGTCAGTCTTTATGC	4.79749	GCAGAAAGACTGAGTA	TACTCAGTCTTTCTGC	2.54908	GTAAAAAGACTGTATA	TATACAGTCTTTTTAC	2.02779	GCGAAAAGACTGTTCA	TGAACAGTCTTTTCGC	0.457927	NA	0.367658	-0.672487	0.616824	-0.256432	-0.722194
AAAGACTT	AAGTCTTT	4.56648	ACAAAAAGACTTGTCG	CGACAAGTCTTTTTGT	NA	CGCAAAAGACTTCATA	TATGAAGTCTTTTGCG	3.84251	AGTAAAAGACTTCATC	GATGAAGTCTTTTACT	1.8479	GCATAAAGACTTACTT	AAGTAAGTCTTTATGC	3.28746	GCAGAAAGACTTAGTA	TACTAAGTCTTTCTGC	3.10212	GTAAAAAGACTTTATA	TATAAAGTCTTTTTAC	NA	GCGAAAAGACTTTTCA	TGAAAAGTCTTTTCGC	1.08698	NA	-1.75142	-0.820295	-0.641954	0.25774	NA
AAAGAGAA	TTCTCTTT	4.2063	ACAAAAAGAGAAGTCG	CGACTTCTCTTTTTGT	NA	CGCAAAAGAGAACATA	TATGTTCTCTTTTGCG	5.53971	AGTAAAAGAGAACATC	GATGTTCTCTTTTACT	3.40545	GCATAAAGAGAAACTT	AAGTTTCTCTTTATGC	2.07539	GCAGAAAGAGAAAGTA	TACTTTCTCTTTCTGC	NA	GTAAAAAGAGAATATA	TATATTCTCTTTTTAC	2.51236	GCGAAAAGAGAATTCA	TGAATTCTCTTTTCGC	0.57373	NA	0.246838	0.753193	-1.65236	NA	-0.219224
AAAGAGAC	GTCTCTTT	4.86647	ACAAAAAGAGACGTCG	CGACGTCTCTTTTTGT	NA	CGCAAAAGAGACCATA	TATGGTCTCTTTTGCG	5.13537	AGTAAAAGAGACCATC	GATGGTCTCTTTTACT	1.63143	GCATAAAGAGACACTT	AAGTGTCTCTTTATGC	4.54935	GCAGAAAGAGACAGTA	TACTGTCTCTTTCTGC	NA	GTAAAAAGAGACTATA	TATAGTCTCTTTTTAC	2.90186	GCGAAAAGAGACTTCA	TGAAGTCTCTTTTCGC	1.51447	NA	-0.229225	-1.03898	0.40997	NA	0.185071
AAAGAGAG	CTCTCTTT	4.63138	ACAAAAAGAGAGGTCG	CGACCTCTCTTTTTGT	3.34688	CGCAAAAGAGAGCATA	TATGCTCTCTTTTGCG	5.78873	AGTAAAAGAGAGCATC	GATGCTCTCTTTTACT	3.65147	GCATAAAGAGAGACTT	AAGTCTCTCTTTATGC	3.78836	GCAGAAAGAGAGAGTA	TACTCTCTCTTTCTGC	2.59135	GTAAAAAGAGAGTATA	TATACTCTCTTTTTAC	1.81108	GCGAAAAGAGAGTTCA	TGAACTCTCTTTTCGC	1.17946	-2.04269	0.540031	1.00173	-0.224398	-0.217131	-0.947135
AAAGAGAT	ATCTCTTT	4.2332	ACAAAAAGAGATGTCG	CGACATCTCTTTTTGT	NA	CGCAAAAGAGATCATA	TATGATCTCTTTTGCG	4.93766	AGTAAAAGAGATCATC	GATGATCTCTTTTACT	3.92141	GCATAAAGAGATACTT	AAGTATCTCTTTATGC	5.55025	GCAGAAAGAGATAGTA	TACTATCTCTTTCTGC	4.757	GTAAAAAGAGATTATA	TATAATCTCTTTTTAC	0.711688	GCGAAAAGAGATTTCA	TGAAATCTCTTTTCGC	0.612061	NA	-0.462006	1.27443	1.24433	1.79629	-2.08828
AAAGAGCA	TGCTCTTT	4.58253	ACAAAAAGAGCAGTCG	CGACTGCTCTTTTTGT	5.32657	CGCAAAAGAGCACATA	TATGTGCTCTTTTGCG	4.89573	AGTAAAAGAGCACATC	GATGTGCTCTTTTACT	3.51978	GCATAAAGAGCAACTT	AAGTTGCTCTTTATGC	5.12384	GCAGAAAGAGCAAGTA	TACTTGCTCTTTCTGC	NA	GTAAAAAGAGCATATA	TATATGCTCTTTTTAC	NA	GCGAAAAGAGCATTCA	TGAATGCTCTTTTCGC	1.10986	0.59496	-0.511372	0.868696	0.888876	NA	NA
AAAGAGCC	GGCTCTTT	4.19291	ACAAAAAGAGCCGTCG	CGACGGCTCTTTTTGT	NA	CGCAAAAGAGCCCATA	TATGGGCTCTTTTGCG	5.28956	AGTAAAAGAGCCCATC	GATGGGCTCTTTTACT	2.46289	GCATAAAGAGCCACTT	AAGTGGCTCTTTATGC	NA	GCAGAAAGAGCCAGTA	TACTGGCTCTTTCTGC	2.78475	GTAAAAAGAGCCTATA	TATAGGCTCTTTTTAC	3.86138	GCGAAAAGAGCCTTCA	TGAAGGCTCTTTTCGC	0.554645	NA	-0.0476871	-0.199015	NA	-0.0373282	1.18102
AAAGAGCG	CGCTCTTT	4.68169	ACAAAAAGAGCGGTCG	CGACCGCTCTTTTTGT	5.17287	CGCAAAAGAGCGCATA	TATGCGCTCTTTTGCG	5.31377	AGTAAAAGAGCGCATC	GATGCGCTCTTTTACT	2.98769	GCATAAAGAGCGACTT	AAGTCGCTCTTTATGC	4.79242	GCAGAAAGAGCGAGTA	TACTCGCTCTTTCTGC	3.84719	GTAAAAAGAGCGTATA	TATACGCTCTTTTTAC	NA	GCGAAAAGAGCGTTCA	TGAACGCTCTTTTCGC	1.25116	0.390175	-0.0191857	0.33116	0.612595	0.950433	NA
AAAGAGCT	AGCTCTTT	4.38154	ACAAAAAGAGCTGTCG	CGACAGCTCTTTTTGT	5.0505	CGCAAAAGAGCTCATA	TATGAGCTCTTTTGCG	5.76374	AGTAAAAGAGCTCATC	GATGAGCTCTTTTACT	1.99788	GCATAAAGAGCTACTT	AAGTAGCTCTTTATGC	4.94367	GCAGAAAGAGCTAGTA	TACTAGCTCTTTCTGC	3.10517	GTAAAAAGAGCTTATA	TATAAGCTCTTTTTAC	1.62599	GCGAAAAGAGCTTTCA	TGAAAGCTCTTTTCGC	0.823442	0.227127	0.510602	-0.668777	0.738685	0.260571	-1.13925
AAAGAGGA	TCCTCTTT	4.00597	ACAAAAAGAGGAGTCG	CGACTCCTCTTTTTGT	NA	CGCAAAAGAGGACATA	TATGTCCTCTTTTGCG	3.5829	AGTAAAAGAGGACATC	GATGTCCTCTTTTACT	3.38812	GCATAAAGAGGAACTT	AAGTTCCTCTTTATGC	7.84486	GCAGAAAGAGGAAGTA	TACTTCCTCTTTCTGC	3.99653	GTAAAAAGAGGATATA	TATATCCTCTTTTTAC	2.42359	GCGAAAAGAGGATTCA	TGAATCCTCTTTTCGC	0.288259	NA	-2.05709	0.735691	3.15716	1.08927	-0.311361
AAAGAGGC	GCCTCTTT	3.84458	ACAAAAAGAGGCGTCG	CGACGCCTCTTTTTGT	4.45888	CGCAAAAGAGGCCATA	TATGGCCTCTTTTGCG	4.81941	AGTAAAAGAGGCCATC	GATGGCCTCTTTTACT	1.78761	GCATAAAGAGGCACTT	AAGTGCCTCTTTATGC	4.03639	GCAGAAAGAGGCAGTA	TACTGCCTCTTTCTGC	2.19139	GTAAAAAGAGGCTATA	TATAGCCTCTTTTTAC	0.901626	GCGAAAAGAGGCTTCA	TGAAGCCTCTTTTCGC	0.0582845	-0.561111	-0.601242	-0.8812	-0.0176424	-0.588977	-1.89113
AAAGAGGG	CCCTCTTT	4.10036	ACAAAAAGAGGGGTCG	CGACCCCTCTTTTTGT	5.25655	CGCAAAAGAGGGCATA	TATGCCCTCTTTTGCG	5.57866	AGTAAAAGAGGGCATC	GATGCCCTCTTTTACT	2.83073	GCATAAAGAGGGACTT	AAGTCCCTCTTTATGC	4.34492	GCAGAAAGAGGGAGTA	TACTCCCTCTTTCTGC	2.82387	GTAAAAAGAGGGTATA	TATACCCTCTTTTTAC	2.09071	GCGAAAAGAGGGTTCA	TGAACCCTCTTTTCGC	0.422763	0.501666	0.292689	0.172589	0.239556	-0.000951308	-0.656891
AAAGAGGT	ACCTCTTT	4.04578	ACAAAAAGAGGTGTCG	CGACACCTCTTTTTGT	NA	CGCAAAAGAGGTCATA	TATGACCTCTTTTGCG	5.25518	AGTAAAAGAGGTCATC	GATGACCTCTTTTACT	1.73614	GCATAAAGAGGTACTT	AAGTACCTCTTTATGC	3.08669	GCAGAAAGAGGTAGTA	TACTACCTCTTTCTGC	2.6621	GTAAAAAGAGGTTATA	TATAACCTCTTTTTAC	1.78362	GCGAAAAGAGGTTTCA	TGAAACCTCTTTTCGC	0.344992	NA	-0.0881719	-0.933197	-0.80932	-0.151358	-0.975643
AAAGAGTA	TACTCTTT	3.62338	ACAAAAAGAGTAGTCG	CGACTACTCTTTTTGT	NA	CGCAAAAGAGTACATA	TATGTACTCTTTTGCG	5.115	AGTAAAAGAGTACATC	GATGTACTCTTTTACT	NA	GCATAAAGAGTAACTT	AAGTTACTCTTTATGC	3.97273	GCAGAAAGAGTAAGTA	TACTTACTCTTTCTGC	3.30851	GTAAAAAGAGTATATA	TATATACTCTTTTTAC	2.63134	GCGAAAAGAGTATTCA	TGAATACTCTTTTCGC	-0.256931	NA	-0.25321	NA	-0.0707024	0.449614	-0.0957203
AAAGAGTC	GACTCTTT	3.94654	ACAAAAAGAGTCGTCG	CGACGACTCTTTTTGT	NA	CGCAAAAGAGTCCATA	TATGGACTCTTTTGCG	4.84152	AGTAAAAGAGTCCATC	GATGGACTCTTTTACT	2.32921	GCATAAAGAGTCACTT	AAGTGACTCTTTATGC	3.8485	GCAGAAAGAGTCAGTA	TACTGACTCTTTCTGC	3.12878	GTAAAAAGAGTCTATA	TATAGACTCTTTTTAC	2.3115	GCGAAAAGAGTCTTCA	TGAAGACTCTTTTCGC	0.203579	NA	-0.57521	-0.334054	-0.174268	0.282518	-0.42771
AAAGAGTG	CACTCTTT	3.96737	ACAAAAAGAGTGGTCG	CGACCACTCTTTTTGT	4.81051	CGCAAAAGAGTGCATA	TATGCACTCTTTTGCG	4.13489	AGTAAAAGAGTGCATC	GATGCACTCTTTTACT	3.35671	GCATAAAGAGTGACTT	AAGTCACTCTTTATGC	5.17964	GCAGAAAGAGTGAGTA	TACTCACTCTTTCTGC	2.63925	GTAAAAAGAGTGTATA	TATACACTCTTTTTAC	3.02451	GCGAAAAGAGTGTTCA	TGAACACTCTTTTCGC	0.233261	-0.0926203	-1.40718	0.703959	0.93539	-0.172594	0.31238
AAAGAGTT	AACTCTTT	3.20042	ACAAAAAGAGTTGTCG	CGACAACTCTTTTTGT	NA	CGCAAAAGAGTTCATA	TATGAACTCTTTTGCG	4.80236	AGTAAAAGAGTTCATC	GATGAACTCTTTTACT	NA	GCATAAAGAGTTACTT	AAGTAACTCTTTATGC	2.39941	GCAGAAAGAGTTAGTA	TACTAACTCTTTCTGC	2.4311	GTAAAAAGAGTTTATA	TATAAACTCTTTTTAC	1.90816	GCGAAAAGAGTTTTCA	TGAAAACTCTTTTCGC	-0.859642	NA	-0.621305	NA	-1.38225	-0.366114	-0.846375
AAAGATAA	TTATCTTT	5.62023	ACAAAAAGATAAGTCG	CGACTTATCTTTTTGT	NA	CGCAAAAGATAACATA	TATGTTATCTTTTGCG	5.41547	AGTAAAAGATAACATC	GATGTTATCTTTTACT	4.96793	GCATAAAGATAAACTT	AAGTTTATCTTTATGC	6.527	GCAGAAAGATAAAGTA	TACTTTATCTTTCTGC	NA	GTAAAAAGATAATATA	TATATTATCTTTTTAC	2.2983	GCGAAAAGATAATTCA	TGAATTATCTTTTCGC	2.58858	NA	0.100561	2.33167	2.05857	NA	-0.441411
AAAGATAC	GTATCTTT	5.68665	ACAAAAAGATACGTCG	CGACGTATCTTTTTGT	NA	CGCAAAAGATACCATA	TATGGTATCTTTTGCG	4.79411	AGTAAAAGATACCATC	GATGGTATCTTTTACT	2.94878	GCATAAAGATACACTT	AAGTGTATCTTTATGC	NA	GCAGAAAGATACAGTA	TACTGTATCTTTCTGC	NA	GTAAAAAGATACTATA	TATAGTATCTTTTTAC	NA	GCGAAAAGATACTTCA	TGAAGTATCTTTTCGC	2.68322	NA	-0.631021	0.291847	NA	NA	NA
AAAGATAG	CTATCTTT	4.71885	ACAAAAAGATAGGTCG	CGACCTATCTTTTTGT	5.71799	CGCAAAAGATAGCATA	TATGCTATCTTTTGCG	5.49758	AGTAAAAGATAGCATC	GATGCTATCTTTTACT	3.50563	GCATAAAGATAGACTT	AAGTCTATCTTTATGC	4.77959	GCAGAAAGATAGAGTA	TACTCTATCTTTCTGC	3.16622	GTAAAAAGATAGTATA	TATACTATCTTTTTAC	2.28551	GCGAAAAGATAGTTCA	TGAACTATCTTTTCGC	1.30411	1.11647	0.197236	0.8544	0.6019	0.317327	-0.454686
AAAGATAT	ATATCTTT	4.4007	ACAAAAAGATATGTCG	CGACATATCTTTTTGT	NA	CGCAAAAGATATCATA	TATGATATCTTTTGCG	5.23139	AGTAAAAGATATCATC	GATGATATCTTTTACT	3.21594	GCATAAAGATATACTT	AAGTATATCTTTATGC	5.5951	GCAGAAAGATATAGTA	TACTATATCTTTCTGC	3.86852	GTAAAAAGATATTATA	TATAATATCTTTTTAC	3.30833	GCGAAAAGATATTTCA	TGAAATATCTTTTCGC	0.850755	NA	-0.116181	0.561747	1.28172	0.970262	0.606973
AAAGATCA	TGATCTTT	4.28161	ACAAAAAGATCAGTCG	CGACTGATCTTTTTGT	NA	CGCAAAAGATCACATA	TATGTGATCTTTTGCG	5.58352	AGTAAAAGATCACATC	GATGTGATCTTTTACT	2.83221	GCATAAAGATCAACTT	AAGTTGATCTTTATGC	4.43082	GCAGAAAGATCAAGTA	TACTTGATCTTTCTGC	3.14424	GTAAAAAGATCATATA	TATATGATCTTTTTAC	NA	GCGAAAAGATCATTCA	TGAATGATCTTTTCGC	0.681041	NA	0.298421	0.174089	0.311167	0.296897	NA
AAAGATCC	GGATCTTT	4.23173	ACAAAAAGATCCGTCG	CGACGGATCTTTTTGT	NA	CGCAAAAGATCCCATA	TATGGGATCTTTTGCG	6.04709	AGTAAAAGATCCCATC	GATGGGATCTTTTACT	2.12023	GCATAAAGATCCACTT	AAGTGGATCTTTATGC	5.16299	GCAGAAAGATCCAGTA	TACTGGATCTTTCTGC	NA	GTAAAAAGATCCTATA	TATAGGATCTTTTTAC	NA	GCGAAAAGATCCTTCA	TGAAGGATCTTTTCGC	0.609961	NA	0.844221	-0.54518	0.92151	NA	NA
AAAGATCG	CGATCTTT	4.21152	ACAAAAAGATCGGTCG	CGACCGATCTTTTTGT	4.48241	CGCAAAAGATCGCATA	TATGCGATCTTTTGCG	5.03433	AGTAAAAGATCGCATC	GATGCGATCTTTTACT	2.28163	GCATAAAGATCGACTT	AAGTCGATCTTTATGC	NA	GCAGAAAGATCGAGTA	TACTCGATCTTTCTGC	4.30643	GTAAAAAGATCGTATA	TATACGATCTTTTTAC	NA	GCGAAAAGATCGTTCA	TGAACGATCTTTTCGC	0.581171	-0.52976	-0.348193	-0.382127	NA	1.3774	NA
AAAGATCT	AGATCTTT	4.50304	ACAAAAAGATCTGTCG	CGACAGATCTTTTTGT	NA	CGCAAAAGATCTCATA	TATGAGATCTTTTGCG	4.60303	AGTAAAAGATCTCATC	GATGAGATCTTTTACT	2.45956	GCATAAAGATCTACTT	AAGTAGATCTTTATGC	4.10817	GCAGAAAGATCTAGTA	TACTAGATCTTTCTGC	3.514	GTAAAAAGATCTTATA	TATAAGATCTTTTTAC	NA	GCGAAAAGATCTTTCA	TGAAAGATCTTTTCGC	0.996582	NA	-0.855997	-0.202371	0.042199	0.640659	NA
AAAGATGA	TCATCTTT	5.49737	ACAAAAAGATGAGTCG	CGACTCATCTTTTTGT	NA	CGCAAAAGATGACATA	TATGTCATCTTTTGCG	5.80331	AGTAAAAGATGACATC	GATGTCATCTTTTACT	2.69304	GCATAAAGATGAACTT	AAGTTCATCTTTATGC	3.18353	GCAGAAAGATGAAGTA	TACTTCATCTTTCTGC	4.43741	GTAAAAAGATGATATA	TATATCATCTTTTTAC	3.51995	GCGAAAAGATGATTCA	TGAATCATCTTTTCGC	2.41351	NA	0.557197	0.0334988	-0.728599	1.49916	0.826632
AAAGATGC	GCATCTTT	4.35248	ACAAAAAGATGCGTCG	CGACGCATCTTTTTGT	NA	CGCAAAAGATGCCATA	TATGGCATCTTTTGCG	5.10476	AGTAAAAGATGCCATC	GATGGCATCTTTTACT	NA	GCATAAAGATGCACTT	AAGTGCATCTTTATGC	NA	GCAGAAAGATGCAGTA	TACTGCATCTTTCTGC	2.89199	GTAAAAAGATGCTATA	TATAGCATCTTTTTAC	2.20747	GCGAAAAGATGCTTCA	TGAAGCATCTTTTCGC	0.782034	NA	-0.265273	NA	NA	0.0623744	-0.535689
AAAGATGG	CCATCTTT	4.66989	ACAAAAAGATGGGTCG	CGACCCATCTTTTTGT	4.45678	CGCAAAAGATGGCATA	TATGCCATCTTTTGCG	4.30477	AGTAAAAGATGGCATC	GATGCCATCTTTTACT	2.75098	GCATAAAGATGGACTT	AAGTCCATCTTTATGC	2.54806	GCAGAAAGATGGAGTA	TACTCCATCTTTCTGC	2.58376	GTAAAAAGATGGTATA	TATACCATCTTTTTAC	1.4104	GCGAAAAGATGGTTCA	TGAACCATCTTTTCGC	1.23434	-0.563916	-1.20717	0.0920312	-1.25833	-0.224187	-1.36303
AAAGATGT	ACATCTTT	4.70603	ACAAAAAGATGTGTCG	CGACACATCTTTTTGT	NA	CGCAAAAGATGTCATA	TATGACATCTTTTGCG	4.75893	AGTAAAAGATGTCATC	GATGACATCTTTTACT	2.71802	GCATAAAGATGTACTT	AAGTACATCTTTATGC	4.75012	GCAGAAAGATGTAGTA	TACTACATCTTTCTGC	2.74971	GTAAAAAGATGTTATA	TATAACATCTTTTTAC	3.0972	GCGAAAAGATGTTTCA	TGAAACATCTTTTCGC	1.28584	NA	-0.672445	0.0587278	0.577333	-0.0699006	0.387822
AAAGATTA	TAATCTTT	5.43333	ACAAAAAGATTAGTCG	CGACTAATCTTTTTGT	NA	CGCAAAAGATTACATA	TATGTAATCTTTTGCG	5.49619	AGTAAAAGATTACATC	GATGTAATCTTTTACT	3.91488	GCATAAAGATTAACTT	AAGTTAATCTTTATGC	5.75294	GCAGAAAGATTAAGTA	TACTTAATCTTTCTGC	4.53644	GTAAAAAGATTATATA	TATATAATCTTTTTAC	3.26773	GCGAAAAGATTATTCA	TGAATAATCTTTTCGC	2.32225	NA	0.195592	1.26784	1.4133	1.59124	0.564833
AAAGATTC	GAATCTTT	5.25565	ACAAAAAGATTCGTCG	CGACGAATCTTTTTGT	NA	CGCAAAAGATTCCATA	TATGGAATCTTTTGCG	5.19955	AGTAAAAGATTCCATC	GATGGAATCTTTTACT	2.63578	GCATAAAGATTCACTT	AAGTGAATCTTTATGC	4.80628	GCAGAAAGATTCAGTA	TACTGAATCTTTCTGC	2.93492	GTAAAAAGATTCTATA	TATAGAATCTTTTTAC	2.53414	GCGAAAAGATTCTTCA	TGAAGAATCTTTTCGC	2.06904	NA	-0.15366	-0.0243528	0.624152	0.102292	-0.19662
AAAGATTG	CAATCTTT	4.45093	ACAAAAAGATTGGTCG	CGACCAATCTTTTTGT	5.52586	CGCAAAAGATTGCATA	TATGCAATCTTTTGCG	5.09757	AGTAAAAGATTGCATC	GATGCAATCTTTTACT	2.4058	GCATAAAGATTGACTT	AAGTCAATCTTTATGC	4.69042	GCAGAAAGATTGAGTA	TACTCAATCTTTCTGC	4.41114	GTAAAAAGATTGTATA	TATACAATCTTTTTAC	1.97274	GCGAAAAGATTGTTCA	TGAACAATCTTTTCGC	0.922323	0.860476	-0.273736	-0.256683	0.52757	1.47474	-0.779343
AAAGATTT	AAATCTTT	5.12617	ACAAAAAGATTTGTCG	CGACAAATCTTTTTGT	NA	CGCAAAAGATTTCATA	TATGAAATCTTTTGCG	4.24887	AGTAAAAGATTTCATC	GATGAAATCTTTTACT	2.50456	GCATAAAGATTTACTT	AAGTAAATCTTTATGC	4.79302	GCAGAAAGATTTAGTA	TACTAAATCTTTCTGC	2.88641	GTAAAAAGATTTTATA	TATAAAATCTTTTTAC	1.74034	GCGAAAAGATTTTTCA	TGAAAAATCTTTTCGC	1.88454	NA	-1.27298	-0.156913	0.613097	0.0571905	-1.02056
AAAGCAAA	TTTGCTTT	4.77619	ACAAAAAGCAAAGTCG	CGACTTTGCTTTTTGT	NA	CGCAAAAGCAAACATA	TATGTTTGCTTTTGCG	6.02351	AGTAAAAGCAAACATC	GATGTTTGCTTTTACT	2.9604	GCATAAAGCAAAACTT	AAGTTTTGCTTTATGC	4.71531	GCAGAAAGCAAAAGTA	TACTTTTGCTTTCTGC	NA	GTAAAAAGCAAATATA	TATATTTGCTTTTTAC	NA	GCGAAAAGCAAATTCA	TGAATTTGCTTTTCGC	1.38582	NA	0.816447	0.303594	0.548322	NA	NA
AAAGCAAC	GTTGCTTT	3.95665	ACAAAAAGCAACGTCG	CGACGTTGCTTTTTGT	NA	CGCAAAAGCAACCATA	TATGGTTGCTTTTGCG	4.46622	AGTAAAAGCAACCATC	GATGGTTGCTTTTACT	2.42361	GCATAAAGCAACACTT	AAGTGTTGCTTTATGC	NA	GCAGAAAGCAACAGTA	TACTGTTGCTTTCTGC	4.00876	GTAAAAAGCAACTATA	TATAGTTGCTTTTTAC	NA	GCGAAAAGCAACTTCA	TGAAGTTGCTTTTCGC	0.217976	NA	-1.01708	-0.238697	NA	1.10064	NA
AAAGCAAG	CTTGCTTT	5.31262	ACAAAAAGCAAGGTCG	CGACCTTGCTTTTTGT	NA	CGCAAAAGCAAGCATA	TATGCTTGCTTTTGCG	NA	AGTAAAAGCAAGCATC	GATGCTTGCTTTTACT	2.73919	GCATAAAGCAAGACTT	AAGTCTTGCTTTATGC	4.76773	GCAGAAAGCAAGAGTA	TACTCTTGCTTTCTGC	1.87738	GTAAAAAGCAAGTATA	TATACTTGCTTTTTAC	NA	GCGAAAAGCAAGTTCA	TGAACTTGCTTTTCGC	2.15023	NA	NA	0.080113	0.592015	-0.880917	NA
AAAGCAAT	ATTGCTTT	4.46203	ACAAAAAGCAATGTCG	CGACATTGCTTTTTGT	NA	CGCAAAAGCAATCATA	TATGATTGCTTTTGCG	5.26306	AGTAAAAGCAATCATC	GATGATTGCTTTTACT	3.22732	GCATAAAGCAATACTT	AAGTATTGCTTTATGC	2.64207	GCAGAAAGCAATAGTA	TACTATTGCTTTCTGC	3.18027	GTAAAAAGCAATTATA	TATAATTGCTTTTTAC	NA	GCGAAAAGCAATTTCA	TGAAATTGCTTTTCGC	0.938141	NA	-0.0788942	0.573241	-1.17996	0.330391	NA
AAAGCACA	TGTGCTTT	4.14048	ACAAAAAGCACAGTCG	CGACTGTGCTTTTTGT	NA	CGCAAAAGCACACATA	TATGTGTGCTTTTGCG	5.11987	AGTAAAAGCACACATC	GATGTGTGCTTTTACT	1.92207	GCATAAAGCACAACTT	AAGTTGTGCTTTATGC	NA	GCAGAAAGCACAAGTA	TACTTGTGCTTTCTGC	3.97592	GTAAAAAGCACATATA	TATATGTGCTTTTTAC	NA	GCGAAAAGCACATTCA	TGAATGTGCTTTTCGC	0.479931	NA	-0.247481	-0.745366	NA	1.07012	NA
AAAGCACC	GGTGCTTT	4.81137	ACAAAAAGCACCGTCG	CGACGGTGCTTTTTGT	NA	CGCAAAAGCACCCATA	TATGGGTGCTTTTGCG	5.45166	AGTAAAAGCACCCATC	GATGGGTGCTTTTACT	NA	GCATAAAGCACCACTT	AAGTGGTGCTTTATGC	NA	GCAGAAAGCACCAGTA	TACTGGTGCTTTCTGC	1.68315	GTAAAAAGCACCTATA	TATAGGTGCTTTTTAC	NA	GCGAAAAGCACCTTCA	TGAAGGTGCTTTTCGC	1.43596	NA	0.143166	NA	NA	-1.06149	NA
AAAGCACG	CGTGCTTT	4.33308	ACAAAAAGCACGGTCG	CGACCGTGCTTTTTGT	4.93619	CGCAAAAGCACGCATA	TATGCGTGCTTTTGCG	5.49269	AGTAAAAGCACGCATC	GATGCGTGCTTTTACT	2.85613	GCATAAAGCACGACTT	AAGTCGTGCTTTATGC	NA	GCAGAAAGCACGAGTA	TACTCGTGCTTTCTGC	2.41242	GTAAAAAGCACGTATA	TATACGTGCTTTTTAC	NA	GCGAAAAGCACGTTCA	TGAACGTGCTTTTCGC	0.754387	0.0748279	0.191469	0.198253	NA	-0.383486	NA
AAAGCACT	AGTGCTTT	4.56922	ACAAAAAGCACTGTCG	CGACAGTGCTTTTTGT	NA	CGCAAAAGCACTCATA	TATGAGTGCTTTTGCG	5.24896	AGTAAAAGCACTCATC	GATGAGTGCTTTTACT	NA	GCATAAAGCACTACTT	AAGTAGTGCTTTATGC	NA	GCAGAAAGCACTAGTA	TACTAGTGCTTTCTGC	3.08001	GTAAAAAGCACTTATA	TATAAGTGCTTTTTAC	NA	GCGAAAAGCACTTTCA	TGAAAGTGCTTTTCGC	1.09089	NA	-0.0954878	NA	NA	0.237178	NA
AAAGCAGA	TCTGCTTT	5.45539	ACAAAAAGCAGAGTCG	CGACTCTGCTTTTTGT	NA	CGCAAAAGCAGACATA	TATGTCTGCTTTTGCG	4.64412	AGTAAAAGCAGACATC	GATGTCTGCTTTTACT	2.71054	GCATAAAGCAGAACTT	AAGTTCTGCTTTATGC	NA	GCAGAAAGCAGAAGTA	TACTTCTGCTTTCTGC	NA	GTAAAAAGCAGATATA	TATATCTGCTTTTTAC	NA	GCGAAAAGCAGATTCA	TGAATCTGCTTTTCGC	2.35368	NA	-0.807623	0.051171	NA	NA	NA
AAAGCAGC	GCTGCTTT	5.19704	ACAAAAAGCAGCGTCG	CGACGCTGCTTTTTGT	5.14656	CGCAAAAGCAGCCATA	TATGGCTGCTTTTGCG	5.05722	AGTAAAAGCAGCCATC	GATGGCTGCTTTTACT	NA	GCATAAAGCAGCACTT	AAGTGCTGCTTTATGC	4.25071	GCAGAAAGCAGCAGTA	TACTGCTGCTTTCTGC	2.80286	GTAAAAAGCAGCTATA	TATAGCTGCTTTTTAC	NA	GCGAAAAGCAGCTTCA	TGAAGCTGCTTTTCGC	1.98553	0.355116	-0.321246	NA	0.161025	-0.0204916	NA
AAAGCAGG	CCTGCTTT	3.28071	ACAAAAAGCAGGGTCG	CGACCCTGCTTTTTGT	NA	CGCAAAAGCAGGCATA	TATGCCTGCTTTTGCG	5.32159	AGTAAAAGCAGGCATC	GATGCCTGCTTTTACT	0.998945	GCATAAAGCAGGACTT	AAGTCCTGCTTTATGC	2.86674	GCAGAAAGCAGGAGTA	TACTCCTGCTTTCTGC	NA	GTAAAAAGCAGGTATA	TATACCTGCTTTTTAC	NA	GCGAAAAGCAGGTTCA	TGAACCTGCTTTTCGC	-0.745229	NA	-0.00997232	-1.67794	-0.992674	NA	NA
AAAGCAGT	ACTGCTTT	4.7417	ACAAAAAGCAGTGTCG	CGACACTGCTTTTTGT	NA	CGCAAAAGCAGTCATA	TATGACTGCTTTTGCG	4.01192	AGTAAAAGCAGTCATC	GATGACTGCTTTTACT	1.01876	GCATAAAGCAGTACTT	AAGTACTGCTTTATGC	3.2697	GCAGAAAGCAGTAGTA	TACTACTGCTTTCTGC	NA	GTAAAAAGCAGTTATA	TATAACTGCTTTTTAC	1.75827	GCGAAAAGCAGTTTCA	TGAAACTGCTTTTCGC	1.33667	NA	-1.55197	-1.65792	-0.656765	NA	-1.00196
AAAGCATA	TATGCTTT	4.21558	ACAAAAAGCATAGTCG	CGACTATGCTTTTTGT	NA	CGCAAAAGCATACATA	TATGTATGCTTTTGCG	5.1933	AGTAAAAGCATACATC	GATGTATGCTTTTACT	3.01614	GCATAAAGCATAACTT	AAGTTATGCTTTATGC	4.43553	GCAGAAAGCATAAGTA	TACTTATGCTTTCTGC	3.56911	GTAAAAAGCATATATA	TATATATGCTTTTTAC	NA	GCGAAAAGCATATTCA	TGAATATGCTTTTCGC	0.586947	NA	-0.161027	0.359905	0.315088	0.691896	NA
AAAGCATC	GATGCTTT	4.80696	ACAAAAAGCATCGTCG	CGACGATGCTTTTTGT	NA	CGCAAAAGCATCCATA	TATGGATGCTTTTGCG	4.68715	AGTAAAAGCATCCATC	GATGGATGCTTTTACT	2.82952	GCATAAAGCATCACTT	AAGTGATGCTTTATGC	3.88441	GCAGAAAGCATCAGTA	TACTGATGCTTTCTGC	NA	GTAAAAAGCATCTATA	TATAGATGCTTTTTAC	NA	GCGAAAAGCATCTTCA	TGAAGATGCTTTTCGC	1.42967	NA	-0.756961	0.171371	-0.144335	NA	NA
AAAGCATG	CATGCTTT	3.86055	ACAAAAAGCATGGTCG	CGACCATGCTTTTTGT	NA	CGCAAAAGCATGCATA	TATGCATGCTTTTGCG	4.96173	AGTAAAAGCATGCATC	GATGCATGCTTTTACT	3.90443	GCATAAAGCATGACTT	AAGTCATGCTTTATGC	5.73893	GCAGAAAGCATGAGTA	TACTCATGCTTTCTGC	3.84588	GTAAAAAGCATGTATA	TATACATGCTTTTTAC	2.32651	GCGAAAAGCATGTTCA	TGAACATGCTTTTCGC	0.0810293	NA	-0.433676	1.25728	1.40162	0.949214	-0.412129
AAAGCATT	AATGCTTT	4.19781	ACAAAAAGCATTGTCG	CGACAATGCTTTTTGT	NA	CGCAAAAGCATTCATA	TATGAATGCTTTTGCG	5.45351	AGTAAAAGCATTCATC	GATGAATGCTTTTACT	1.92211	GCATAAAGCATTACTT	AAGTAATGCTTTATGC	3.87746	GCAGAAAGCATTAGTA	TACTAATGCTTTCTGC	3.49428	GTAAAAAGCATTTATA	TATAAATGCTTTTTAC	NA	GCGAAAAGCATTTTCA	TGAAAATGCTTTTCGC	0.561633	NA	0.145341	-0.745323	-0.150127	0.622333	NA
AAAGCCAA	TTGGCTTT	3.19544	ACAAAAAGCCAAGTCG	CGACTTGGCTTTTTGT	NA	CGCAAAAGCCAACATA	TATGTTGGCTTTTGCG	2.61137	AGTAAAAGCCAACATC	GATGTTGGCTTTTACT	NA	GCATAAAGCCAAACTT	AAGTTTGGCTTTATGC	3.10825	GCAGAAAGCCAAAGTA	TACTTTGGCTTTCTGC	NA	GTAAAAAGCCAATATA	TATATTGGCTTTTTAC	NA	GCGAAAAGCCAATTCA	TGAATTGGCTTTTCGC	-0.866737	NA	-3.20095	NA	-0.791349	NA	NA
AAAGCCAC	GTGGCTTT	4.75848	ACAAAAAGCCACGTCG	CGACGTGGCTTTTTGT	NA	CGCAAAAGCCACCATA	TATGGTGGCTTTTGCG	3.72954	AGTAAAAGCCACCATC	GATGGTGGCTTTTACT	2.07315	GCATAAAGCCACACTT	AAGTGTGGCTTTATGC	NA	GCAGAAAGCCACAGTA	TACTGTGGCTTTCTGC	3.9193	GTAAAAAGCCACTATA	TATAGTGGCTTTTTAC	NA	GCGAAAAGCCACTTCA	TGAAGTGGCTTTTCGC	1.36059	NA	-1.88443	-0.592742	NA	1.01747	NA
AAAGCCAG	CTGGCTTT	3.57081	ACAAAAAGCCAGGTCG	CGACCTGGCTTTTTGT	NA	CGCAAAAGCCAGCATA	TATGCTGGCTTTTGCG	4.3037	AGTAAAAGCCAGCATC	GATGCTGGCTTTTACT	NA	GCATAAAGCCAGACTT	AAGTCTGGCTTTATGC	4.20507	GCAGAAAGCCAGAGTA	TACTCTGGCTTTCTGC	NA	GTAAAAAGCCAGTATA	TATACTGGCTTTTTAC	1.39467	GCGAAAAGCCAGTTCA	TGAACTGGCTTTTCGC	-0.331838	NA	-1.20842	NA	0.122977	NA	-1.37936
AAAGCCAT	ATGGCTTT	4.22323	ACAAAAAGCCATGTCG	CGACATGGCTTTTTGT	4.32019	CGCAAAAGCCATCATA	TATGATGGCTTTTGCG	3.87295	AGTAAAAGCCATCATC	GATGATGGCTTTTACT	2.03687	GCATAAAGCCATACTT	AAGTATGGCTTTATGC	3.04461	GCAGAAAGCCATAGTA	TACTATGGCTTTCTGC	3.08481	GTAAAAAGCCATTATA	TATAATGGCTTTTTAC	NA	GCGAAAAGCCATTTCA	TGAAATGGCTTTTCGC	0.59785	-0.745896	-1.71559	-0.629387	-0.844402	0.241641	NA
AAAGCCCA	TGGGCTTT	3.83745	ACAAAAAGCCCAGTCG	CGACTGGGCTTTTTGT	NA	CGCAAAAGCCCACATA	TATGTGGGCTTTTGCG	5.90662	AGTAAAAGCCCACATC	GATGTGGGCTTTTACT	NA	GCATAAAGCCCAACTT	AAGTTGGGCTTTATGC	NA	GCAGAAAGCCCAAGTA	TACTTGGGCTTTCTGC	NA	GTAAAAAGCCCATATA	TATATGGGCTTTTTAC	NA	GCGAAAAGCCCATTCA	TGAATGGGCTTTTCGC	0.0481216	NA	0.67883	NA	NA	NA	NA
AAAGCCCC	GGGGCTTT	3.92569	ACAAAAAGCCCCGTCG	CGACGGGGCTTTTTGT	NA	CGCAAAAGCCCCCATA	TATGGGGGCTTTTGCG	5.80407	AGTAAAAGCCCCCATC	GATGGGGGCTTTTACT	3.74305	GCATAAAGCCCCACTT	AAGTGGGGCTTTATGC	NA	GCAGAAAGCCCCAGTA	TACTGGGGCTTTCTGC	NA	GTAAAAAGCCCCTATA	TATAGGGGCTTTTTAC	NA	GCGAAAAGCCCCTTCA	TGAAGGGGCTTTTCGC	0.173853	NA	0.558085	1.09425	NA	NA	NA
AAAGCCCG	CGGGCTTT	3.80706	ACAAAAAGCCCGGTCG	CGACCGGGCTTTTTGT	NA	CGCAAAAGCCCGCATA	TATGCGGGCTTTTGCG	5.41945	AGTAAAAGCCCGCATC	GATGCGGGCTTTTACT	2.73247	GCATAAAGCCCGACTT	AAGTCGGGCTTTATGC	4.84111	GCAGAAAGCCCGAGTA	TACTCGGGCTTTCTGC	NA	GTAAAAAGCCCGTATA	TATACGGGCTTTTTAC	NA	GCGAAAAGCCCGTTCA	TGAACGGGCTTTTCGC	0.00480925	NA	0.105245	0.0733231	0.653186	NA	NA
AAAGCCCT	AGGGCTTT	3.2798	ACAAAAAGCCCTGTCG	CGACAGGGCTTTTTGT	NA	CGCAAAAGCCCTCATA	TATGAGGGCTTTTGCG	4.70795	AGTAAAAGCCCTCATC	GATGAGGGCTTTTACT	1.63234	GCATAAAGCCCTACTT	AAGTAGGGCTTTATGC	NA	GCAGAAAGCCCTAGTA	TACTAGGGCTTTCTGC	NA	GTAAAAAGCCCTTATA	TATAAGGGCTTTTTAC	NA	GCGAAAAGCCCTTTCA	TGAAAGGGCTTTTCGC	-0.746534	NA	-0.732469	-1.03806	NA	NA	NA
AAAGCCGA	TCGGCTTT	2.40768	ACAAAAAGCCGAGTCG	CGACTCGGCTTTTTGT	NA	CGCAAAAGCCGACATA	TATGTCGGCTTTTGCG	5.59591	AGTAAAAGCCGACATC	GATGTCGGCTTTTACT	1.72515	GCATAAAGCCGAACTT	AAGTTCGGCTTTATGC	1.30536	GCAGAAAGCCGAAGTA	TACTTCGGCTTTCTGC	2.7998	GTAAAAAGCCGATATA	TATATCGGCTTTTTAC	NA	GCGAAAAGCCGATTCA	TGAATCGGCTTTTCGC	-1.98931	NA	0.313001	-0.944305	-2.29426	-0.0233342	NA
AAAGCCGC	GCGGCTTT	4.31579	ACAAAAAGCCGCGTCG	CGACGCGGCTTTTTGT	NA	CGCAAAAGCCGCCATA	TATGGCGGCTTTTGCG	3.53106	AGTAAAAGCCGCCATC	GATGGCGGCTTTTACT	2.76821	GCATAAAGCCGCACTT	AAGTGCGGCTTTATGC	NA	GCAGAAAGCCGCAGTA	TACTGCGGCTTTCTGC	3.30225	GTAAAAAGCCGCTATA	TATAGCGGCTTTTTAC	NA	GCGAAAAGCCGCTTCA	TGAAGCGGCTTTTCGC	0.729758	NA	-2.11812	0.109436	NA	0.443794	NA
AAAGCCGG	CCGGCTTT	2.6933	ACAAAAAGCCGGGTCG	CGACCCGGCTTTTTGT	5.40346	CGCAAAAGCCGGCATA	TATGCCGGCTTTTGCG	4.84056	AGTAAAAGCCGGCATC	GATGCCGGCTTTTACT	1.58841	GCATAAAGCCGGACTT	AAGTCCGGCTTTATGC	NA	GCAGAAAGCCGGAGTA	TACTCCGGCTTTCTGC	3.28235	GTAAAAAGCCGGTATA	TATACCGGCTTTTTAC	1.84109	GCGAAAAGCCGGTTCA	TGAACCGGCTTTTCGC	-1.58229	0.697397	-0.576337	-1.08244	NA	0.425294	-0.915989
AAAGCCGT	ACGGCTTT	3.00162	ACAAAAAGCCGTGTCG	CGACACGGCTTTTTGT	5.23056	CGCAAAAGCCGTCATA	TATGACGGCTTTTGCG	4.88769	AGTAAAAGCCGTCATC	GATGACGGCTTTTACT	0.837714	GCATAAAGCCGTACTT	AAGTACGGCTTTATGC	4.24446	GCAGAAAGCCGTAGTA	TACTACGGCTTTCTGC	3.12385	GTAAAAAGCCGTTATA	TATAACGGCTTTTTAC	1.87237	GCGAAAAGCCGTTTCA	TGAAACGGCTTTTCGC	-1.14293	0.467031	-0.520847	-1.84082	0.155814	0.277934	-0.883515
AAAGCCTA	TAGGCTTT	2.92543	ACAAAAAGCCTAGTCG	CGACTAGGCTTTTTGT	4.13303	CGCAAAAGCCTACATA	TATGTAGGCTTTTGCG	5.11102	AGTAAAAGCCTACATC	GATGTAGGCTTTTACT	1.56228	GCATAAAGCCTAACTT	AAGTTAGGCTTTATGC	4.42963	GCAGAAAGCCTAAGTA	TACTTAGGCTTTCTGC	NA	GTAAAAAGCCTATATA	TATATAGGCTTTTTAC	NA	GCGAAAAGCCTATTCA	TGAATAGGCTTTTCGC	-1.25151	-0.995266	-0.257905	-1.10883	0.310174	NA	NA
AAAGCCTC	GAGGCTTT	4.8534	ACAAAAAGCCTCGTCG	CGACGAGGCTTTTTGT	NA	CGCAAAAGCCTCCATA	TATGGAGGCTTTTGCG	4.2147	AGTAAAAGCCTCCATC	GATGGAGGCTTTTACT	2.44741	GCATAAAGCCTCACTT	AAGTGAGGCTTTATGC	5.08063	GCAGAAAGCCTCAGTA	TACTGAGGCTTTCTGC	3.32076	GTAAAAAGCCTCTATA	TATAGAGGCTTTTTAC	NA	GCGAAAAGCCTCTTCA	TGAAGAGGCTTTTCGC	1.49584	NA	-1.31321	-0.21465	0.852853	0.461009	NA
AAAGCCTG	CAGGCTTT	3.15348	ACAAAAAGCCTGGTCG	CGACCAGGCTTTTTGT	4.91781	CGCAAAAGCCTGCATA	TATGCAGGCTTTTGCG	4.85679	AGTAAAAGCCTGCATC	GATGCAGGCTTTTACT	2.08864	GCATAAAGCCTGACTT	AAGTCAGGCTTTATGC	4.66165	GCAGAAAGCCTGAGTA	TACTCAGGCTTTCTGC	3.52126	GTAAAAAGCCTGTATA	TATACAGGCTTTTTAC	NA	GCGAAAAGCCTGTTCA	TGAACAGGCTTTTCGC	-0.92653	0.0503427	-0.557221	-0.577091	0.503585	0.647417	NA
AAAGCCTT	AAGGCTTT	3.97333	ACAAAAAGCCTTGTCG	CGACAAGGCTTTTTGT	NA	CGCAAAAGCCTTCATA	TATGAAGGCTTTTGCG	4.76065	AGTAAAAGCCTTCATC	GATGAAGGCTTTTACT	1.59945	GCATAAAGCCTTACTT	AAGTAAGGCTTTATGC	4.08832	GCAGAAAGCCTTAGTA	TACTAAGGCTTTCTGC	3.81108	GTAAAAAGCCTTTATA	TATAAAGGCTTTTTAC	1.87742	GCGAAAAGCCTTTTCA	TGAAAAGGCTTTTCGC	0.241748	NA	-0.670419	-1.07129	0.0256504	0.91686	-0.878282
AAAGCGAA	TTCGCTTT	4.23843	ACAAAAAGCGAAGTCG	CGACTTCGCTTTTTGT	NA	CGCAAAAGCGAACATA	TATGTTCGCTTTTGCG	5.48572	AGTAAAAGCGAACATC	GATGTTCGCTTTTACT	2.8468	GCATAAAGCGAAACTT	AAGTTTCGCTTTATGC	3.63714	GCAGAAAGCGAAAGTA	TACTTTCGCTTTCTGC	3.81449	GTAAAAAGCGAATATA	TATATTCGCTTTTTAC	NA	GCGAAAAGCGAATTCA	TGAATTCGCTTTTCGC	0.619517	NA	0.183268	0.188833	-0.35046	0.920031	NA
AAAGCGAC	GTCGCTTT	3.70162	ACAAAAAGCGACGTCG	CGACGTCGCTTTTTGT	NA	CGCAAAAGCGACCATA	TATGGTCGCTTTTGCG	4.9061	AGTAAAAGCGACCATC	GATGGTCGCTTTTACT	2.81049	GCATAAAGCGACACTT	AAGTGTCGCTTTATGC	NA	GCAGAAAGCGACAGTA	TACTGTCGCTTTCTGC	3.50374	GTAAAAAGCGACTATA	TATAGTCGCTTTTTAC	NA	GCGAAAAGCGACTTCA	TGAAGTCGCTTTTCGC	-0.145442	NA	-0.499172	0.152147	NA	0.631129	NA
AAAGCGAG	CTCGCTTT	4.29419	ACAAAAAGCGAGGTCG	CGACCTCGCTTTTTGT	NA	CGCAAAAGCGAGCATA	TATGCTCGCTTTTGCG	5.44999	AGTAAAAGCGAGCATC	GATGCTCGCTTTTACT	2.92282	GCATAAAGCGAGACTT	AAGTCTCGCTTTATGC	4.71091	GCAGAAAGCGAGAGTA	TACTCTCGCTTTCTGC	3.54999	GTAAAAAGCGAGTATA	TATACTCGCTTTTTAC	1.56938	GCGAAAAGCGAGTTCA	TGAACTCGCTTTTCGC	0.698971	NA	0.141195	0.265622	0.544647	0.674125	-1.19802
AAAGCGAT	ATCGCTTT	3.57454	ACAAAAAGCGATGTCG	CGACATCGCTTTTTGT	NA	CGCAAAAGCGATCATA	TATGATCGCTTTTGCG	4.83143	AGTAAAAGCGATCATC	GATGATCGCTTTTACT	3.28366	GCATAAAGCGATACTT	AAGTATCGCTTTATGC	6.68163	GCAGAAAGCGATAGTA	TACTATCGCTTTCTGC	4.39692	GTAAAAAGCGATTATA	TATAATCGCTTTTTAC	NA	GCGAAAAGCGATTTCA	TGAAATCGCTTTTCGC	-0.326525	NA	-0.587082	0.630155	2.18747	1.46152	NA
AAAGCGCA	TGCGCTTT	3.88178	ACAAAAAGCGCAGTCG	CGACTGCGCTTTTTGT	NA	CGCAAAAGCGCACATA	TATGTGCGCTTTTGCG	5.72135	AGTAAAAGCGCACATC	GATGTGCGCTTTTACT	1.93014	GCATAAAGCGCAACTT	AAGTTGCGCTTTATGC	3.69906	GCAGAAAGCGCAAGTA	TACTTGCGCTTTCTGC	3.5205	GTAAAAAGCGCATATA	TATATGCGCTTTTTAC	NA	GCGAAAAGCGCATTCA	TGAATGCGCTTTTCGC	0.111291	NA	0.460692	-0.737217	-0.298843	0.646705	NA
AAAGCGCC	GGCGCTTT	3.68036	ACAAAAAGCGCCGTCG	CGACGGCGCTTTTTGT	4.14506	CGCAAAAGCGCCCATA	TATGGGCGCTTTTGCG	5.4745	AGTAAAAGCGCCCATC	GATGGGCGCTTTTACT	1.77098	GCATAAAGCGCCACTT	AAGTGGCGCTTTATGC	NA	GCAGAAAGCGCCAGTA	TACTGGCGCTTTCTGC	3.89355	GTAAAAAGCGCCTATA	TATAGGCGCTTTTTAC	NA	GCGAAAAGCGCCTTCA	TGAAGGCGCTTTTCGC	-0.175734	-0.979228	0.170061	-0.898005	NA	0.993537	NA
AAAGCGCG	CGCGCTTT	4.0336	ACAAAAAGCGCGGTCG	CGACCGCGCTTTTTGT	4.67162	CGCAAAAGCGCGCATA	TATGCGCGCTTTTGCG	5.08903	AGTAAAAGCGCGCATC	GATGCGCGCTTTTACT	2.63392	GCATAAAGCGCGACTT	AAGTCGCGCTTTATGC	4.88904	GCAGAAAGCGCGAGTA	TACTCGCGCTTTCTGC	3.53517	GTAAAAAGCGCGTATA	TATACGCGCTTTTTAC	1.08972	GCGAAAAGCGCGTTCA	TGAACGCGCTTTTCGC	0.327634	-0.277665	-0.283785	-0.0262275	0.693145	0.660341	-1.69589
AAAGCGCT	AGCGCTTT	4.07998	ACAAAAAGCGCTGTCG	CGACAGCGCTTTTTGT	5.27996	CGCAAAAGCGCTCATA	TATGAGCGCTTTTGCG	5.50514	AGTAAAAGCGCTCATC	GATGAGCGCTTTTACT	2.00727	GCATAAAGCGCTACTT	AAGTAGCGCTTTATGC	NA	GCAGAAAGCGCTAGTA	TACTAGCGCTTTCTGC	3.53643	GTAAAAAGCGCTTATA	TATAAGCGCTTTTTAC	NA	GCGAAAAGCGCTTTCA	TGAAAGCGCTTTTCGC	0.393728	0.532853	0.206137	-0.659296	NA	0.661514	NA
AAAGCGGA	TCCGCTTT	3.46284	ACAAAAAGCGGAGTCG	CGACTCCGCTTTTTGT	4.0062	CGCAAAAGCGGACATA	TATGTCCGCTTTTGCG	5.21901	AGTAAAAGCGGACATC	GATGTCCGCTTTTACT	3.27171	GCATAAAGCGGAACTT	AAGTTCCGCTTTATGC	7.44245	GCAGAAAGCGGAAGTA	TACTTCCGCTTTCTGC	5.9829	GTAAAAAGCGGATATA	TATATCCGCTTTTTAC	2.64076	GCGAAAAGCGGATTCA	TGAATCCGCTTTTCGC	-0.485695	-1.16425	-0.130756	0.618085	2.8217	2.93602	-0.0859455
AAAGCGGC	GCCGCTTT	4.16927	ACAAAAAGCGGCGTCG	CGACGCCGCTTTTTGT	NA	CGCAAAAGCGGCCATA	TATGGCCGCTTTTGCG	4.3053	AGTAAAAGCGGCCATC	GATGGCCGCTTTTACT	2.75194	GCATAAAGCGGCACTT	AAGTGCCGCTTTATGC	3.75135	GCAGAAAGCGGCAGTA	TACTGCCGCTTTCTGC	3.2656	GTAAAAAGCGGCTATA	TATAGCCGCTTTTTAC	1.23867	GCGAAAAGCGGCTTCA	TGAAGCCGCTTTTCGC	0.520957	NA	-1.20654	0.0929945	-0.255255	0.409729	-1.54129
AAAGCGGG	CCCGCTTT	4.19584	ACAAAAAGCGGGGTCG	CGACCCCGCTTTTTGT	5.35122	CGCAAAAGCGGGCATA	TATGCCCGCTTTTGCG	5.92218	AGTAAAAGCGGGCATC	GATGCCCGCTTTTACT	2.00034	GCATAAAGCGGGACTT	AAGTCCCGCTTTATGC	3.81595	GCAGAAAGCGGGAGTA	TACTCCCGCTTTCTGC	3.38289	GTAAAAAGCGGGTATA	TATACCCGCTTTTTAC	2.71739	GCGAAAAGCGGGTTCA	TGAACCCGCTTTTCGC	0.558825	0.627794	0.697147	-0.666296	-0.201397	0.518769	-0.00640598
AAAGCGGT	ACCGCTTT	3.72377	ACAAAAAGCGGTGTCG	CGACACCGCTTTTTGT	4.12141	CGCAAAAGCGGTCATA	TATGACCGCTTTTGCG	4.12737	AGTAAAAGCGGTCATC	GATGACCGCTTTTACT	2.19316	GCATAAAGCGGTACTT	AAGTACCGCTTTATGC	3.93358	GCAGAAAGCGGTAGTA	TACTACCGCTTTCTGC	1.27778	GTAAAAAGCGGTTATA	TATAACCGCTTTTTAC	1.89855	GCGAAAAGCGGTTTCA	TGAAACCGCTTTTCGC	-0.113872	-1.01075	-1.41603	-0.471502	-0.103343	-1.43837	-0.856344
AAAGCGTA	TACGCTTT	3.8577	ACAAAAAGCGTAGTCG	CGACTACGCTTTTTGT	NA	CGCAAAAGCGTACATA	TATGTACGCTTTTGCG	5.67519	AGTAAAAGCGTACATC	GATGTACGCTTTTACT	3.10093	GCATAAAGCGTAACTT	AAGTTACGCTTTATGC	4.40751	GCAGAAAGCGTAAGTA	TACTTACGCTTTCTGC	3.21426	GTAAAAAGCGTATATA	TATATACGCTTTTTAC	NA	GCGAAAAGCGTATTCA	TGAATACGCTTTTCGC	0.0769736	NA	0.40635	0.445555	0.291736	0.361995	NA
AAAGCGTC	GACGCTTT	4.39058	ACAAAAAGCGTCGTCG	CGACGACGCTTTTTGT	4.83155	CGCAAAAGCGTCCATA	TATGGACGCTTTTGCG	5.45584	AGTAAAAGCGTCCATC	GATGGACGCTTTTACT	3.1094	GCATAAAGCGTCACTT	AAGTGACGCTTTATGC	4.12889	GCAGAAAGCGTCAGTA	TACTGACGCTTTCTGC	2.96359	GTAAAAAGCGTCTATA	TATAGACGCTTTTTAC	NA	GCGAAAAGCGTCTTCA	TGAAGACGCTTTTCGC	0.836333	-0.0645842	0.148084	0.45412	0.059469	0.12894	NA
AAAGCGTG	CACGCTTT	3.25986	ACAAAAAGCGTGGTCG	CGACCACGCTTTTTGT	NA	CGCAAAAGCGTGCATA	TATGCACGCTTTTGCG	5.28272	AGTAAAAGCGTGCATC	GATGCACGCTTTTACT	2.54184	GCATAAAGCGTGACTT	AAGTCACGCTTTATGC	4.78341	GCAGAAAGCGTGAGTA	TACTCACGCTTTCTGC	2.96343	GTAAAAAGCGTGTATA	TATACACGCTTTTTAC	2.59596	GCGAAAAGCGTGTTCA	TGAACACGCTTTTCGC	-0.774943	NA	-0.0557425	-0.119254	0.605084	0.128796	-0.132444
AAAGCGTT	AACGCTTT	4.30973	ACAAAAAGCGTTGTCG	CGACAACGCTTTTTGT	4.95305	CGCAAAAGCGTTCATA	TATGAACGCTTTTGCG	5.09149	AGTAAAAGCGTTCATC	GATGAACGCTTTTACT	1.78883	GCATAAAGCGTTACTT	AAGTAACGCTTTATGC	2.52293	GCAGAAAGCGTTAGTA	TACTAACGCTTTCTGC	2.96984	GTAAAAAGCGTTTATA	TATAAACGCTTTTTAC	1.76329	GCGAAAAGCGTTTTCA	TGAAAACGCTTTTCGC	0.721113	0.0972935	-0.280893	-0.879972	-1.27928	0.134749	-0.996745
AAAGCTAA	TTAGCTTT	3.46429	ACAAAAAGCTAAGTCG	CGACTTAGCTTTTTGT	NA	CGCAAAAGCTAACATA	TATGTTAGCTTTTGCG	5.58489	AGTAAAAGCTAACATC	GATGTTAGCTTTTACT	2.75148	GCATAAAGCTAAACTT	AAGTTTAGCTTTATGC	3.50747	GCAGAAAGCTAAAGTA	TACTTTAGCTTTCTGC	1.8872	GTAAAAAGCTAATATA	TATATTAGCTTTTTAC	NA	GCGAAAAGCTAATTCA	TGAATTAGCTTTTCGC	-0.483637	NA	0.300026	0.0925306	-0.458551	-0.871782	NA
AAAGCTAC	GTAGCTTT	3.93153	ACAAAAAGCTACGTCG	CGACGTAGCTTTTTGT	NA	CGCAAAAGCTACCATA	TATGGTAGCTTTTGCG	4.91699	AGTAAAAGCTACCATC	GATGGTAGCTTTTACT	2.1509	GCATAAAGCTACACTT	AAGTGTAGCTTTATGC	NA	GCAGAAAGCTACAGTA	TACTGTAGCTTTCTGC	3.79371	GTAAAAAGCTACTATA	TATAGTAGCTTTTTAC	NA	GCGAAAAGCTACTTCA	TGAAGTAGCTTTTCGC	0.182187	NA	-0.486353	-0.514196	NA	0.900713	NA
AAAGCTAG	CTAGCTTT	4.04974	ACAAAAAGCTAGGTCG	CGACCTAGCTTTTTGT	NA	CGCAAAAGCTAGCATA	TATGCTAGCTTTTGCG	4.76447	AGTAAAAGCTAGCATC	GATGCTAGCTTTTACT	1.62113	GCATAAAGCTAGACTT	AAGTCTAGCTTTATGC	3.90344	GCAGAAAGCTAGAGTA	TACTCTAGCTTTCTGC	2.65489	GTAAAAAGCTAGTATA	TATACTAGCTTTTTAC	NA	GCGAAAAGCTAGTTCA	TGAACTAGCTTTTCGC	0.350625	NA	-0.665919	-1.04939	-0.128467	-0.158059	NA
AAAGCTAT	ATAGCTTT	4.10342	ACAAAAAGCTATGTCG	CGACATAGCTTTTTGT	NA	CGCAAAAGCTATCATA	TATGATAGCTTTTGCG	4.48378	AGTAAAAGCTATCATC	GATGATAGCTTTTACT	2.36065	GCATAAAGCTATACTT	AAGTATAGCTTTATGC	4.61218	GCAGAAAGCTATAGTA	TACTATAGCTTTCTGC	3.65805	GTAAAAAGCTATTATA	TATAATAGCTTTTTAC	NA	GCGAAAAGCTATTTCA	TGAAATAGCTTTTCGC	0.427131	NA	-0.996404	-0.302298	0.462345	0.774592	NA
AAAGCTCA	TGAGCTTT	4.60646	ACAAAAAGCTCAGTCG	CGACTGAGCTTTTTGT	NA	CGCAAAAGCTCACATA	TATGTGAGCTTTTGCG	5.20518	AGTAAAAGCTCACATC	GATGTGAGCTTTTACT	1.3912	GCATAAAGCTCAACTT	AAGTTGAGCTTTATGC	4.5913	GCAGAAAGCTCAAGTA	TACTTGAGCTTTCTGC	3.68762	GTAAAAAGCTCATATA	TATATGAGCTTTTTAC	NA	GCGAAAAGCTCATTCA	TGAATGAGCTTTTCGC	1.14396	NA	-0.147031	-1.28167	0.444943	0.802077	NA
AAAGCTCC	GGAGCTTT	4.32275	ACAAAAAGCTCCGTCG	CGACGGAGCTTTTTGT	NA	CGCAAAAGCTCCCATA	TATGGGAGCTTTTGCG	5.48196	AGTAAAAGCTCCCATC	GATGGGAGCTTTTACT	NA	GCATAAAGCTCCACTT	AAGTGGAGCTTTATGC	NA	GCAGAAAGCTCCAGTA	TACTGGAGCTTTCTGC	3.66101	GTAAAAAGCTCCTATA	TATAGGAGCTTTTTAC	NA	GCGAAAAGCTCCTTCA	TGAAGGAGCTTTTCGC	0.739674	NA	0.178837	NA	NA	0.77734	NA
AAAGCTCG	CGAGCTTT	3.82928	ACAAAAAGCTCGGTCG	CGACCGAGCTTTTTGT	5.24352	CGCAAAAGCTCGCATA	TATGCGAGCTTTTGCG	5.22663	AGTAAAAGCTCGCATC	GATGCGAGCTTTTACT	2.62072	GCATAAAGCTCGACTT	AAGTCGAGCTTTATGC	4.41232	GCAGAAAGCTCGAGTA	TACTCGAGCTTTCTGC	3.5322	GTAAAAAGCTCGTATA	TATACGAGCTTTTTAC	NA	GCGAAAAGCTCGTTCA	TGAACGAGCTTTTCGC	0.036475	0.484302	-0.121782	-0.0395634	0.295744	0.657584	NA
AAAGCTCT	AGAGCTTT	4.5684	ACAAAAAGCTCTGTCG	CGACAGAGCTTTTTGT	4.77024	CGCAAAAGCTCTCATA	TATGAGAGCTTTTGCG	4.80998	AGTAAAAGCTCTCATC	GATGAGAGCTTTTACT	1.43415	GCATAAAGCTCTACTT	AAGTAGAGCTTTATGC	NA	GCAGAAAGCTCTAGTA	TACTAGAGCTTTCTGC	3.22623	GTAAAAAGCTCTTATA	TATAAGAGCTTTTTAC	NA	GCGAAAAGCTCTTTCA	TGAAAGAGCTTTTCGC	1.08972	-0.146267	-0.612338	-1.23828	NA	0.37312	NA
AAAGCTGA	TCAGCTTT	4.51686	ACAAAAAGCTGAGTCG	CGACTCAGCTTTTTGT	NA	CGCAAAAGCTGACATA	TATGTCAGCTTTTGCG	5.47245	AGTAAAAGCTGACATC	GATGTCAGCTTTTACT	2.50197	GCATAAAGCTGAACTT	AAGTTCAGCTTTATGC	3.21459	GCAGAAAGCTGAAGTA	TACTTCAGCTTTCTGC	4.67612	GTAAAAAGCTGATATA	TATATCAGCTTTTTAC	NA	GCGAAAAGCTGATTCA	TGAATCAGCTTTTCGC	1.01628	NA	0.167643	-0.15953	-0.702704	1.7211	NA
AAAGCTGC	GCAGCTTT	4.5866	ACAAAAAGCTGCGTCG	CGACGCAGCTTTTTGT	NA	CGCAAAAGCTGCCATA	TATGGCAGCTTTTGCG	4.79771	AGTAAAAGCTGCCATC	GATGGCAGCTTTTACT	1.75177	GCATAAAGCTGCACTT	AAGTGCAGCTTTATGC	1.8872	GCAGAAAGCTGCAGTA	TACTGCAGCTTTCTGC	2.73801	GTAAAAAGCTGCTATA	TATAGCAGCTTTTTAC	NA	GCGAAAAGCTGCTTCA	TGAAGCAGCTTTTCGC	1.11566	NA	-0.626781	-0.917412	-1.80923	-0.0807771	NA
AAAGCTGG	CCAGCTTT	4.40261	ACAAAAAGCTGGGTCG	CGACCCAGCTTTTTGT	5.23165	CGCAAAAGCTGGCATA	TATGCCAGCTTTTGCG	5.66152	AGTAAAAGCTGGCATC	GATGCCAGCTTTTACT	2.3802	GCATAAAGCTGGACTT	AAGTCCAGCTTTATGC	3.68396	GCAGAAAGCTGGAGTA	TACTCCAGCTTTCTGC	2.81603	GTAAAAAGCTGGTATA	TATACCAGCTTTTTAC	1.55142	GCGAAAAGCTGGTTCA	TGAACCAGCTTTTCGC	0.853464	0.468493	0.390251	-0.282545	-0.311429	-0.00824832	-1.21665
AAAGCTGT	ACAGCTTT	4.35774	ACAAAAAGCTGTGTCG	CGACACAGCTTTTTGT	5.35143	CGCAAAAGCTGTCATA	TATGACAGCTTTTGCG	5.32844	AGTAAAAGCTGTCATC	GATGACAGCTTTTACT	2.81897	GCATAAAGCTGTACTT	AAGTACAGCTTTATGC	5.02423	GCAGAAAGCTGTAGTA	TACTACAGCTTTCTGC	3.16253	GTAAAAAGCTGTTATA	TATAACAGCTTTTTAC	1.10673	GCGAAAAGCTGTTTCA	TGAAACAGCTTTTCGC	0.789531	0.628074	-0.001914	0.160708	0.805838	0.3139	-1.67824
AAAGCTTA	TAAGCTTT	4.38842	ACAAAAAGCTTAGTCG	CGACTAAGCTTTTTGT	NA	CGCAAAAGCTTACATA	TATGTAAGCTTTTGCG	5.32872	AGTAAAAGCTTACATC	GATGTAAGCTTTTACT	1.95085	GCATAAAGCTTAACTT	AAGTTAAGCTTTATGC	4.19621	GCAGAAAGCTTAAGTA	TACTTAAGCTTTCTGC	4.31266	GTAAAAAGCTTATATA	TATATAAGCTTTTTAC	NA	GCGAAAAGCTTATTCA	TGAATAAGCTTTTCGC	0.833254	NA	-0.0015767	-0.716294	0.11559	1.38318	NA
AAAGCTTC	GAAGCTTT	4.5587	ACAAAAAGCTTCGTCG	CGACGAAGCTTTTTGT	NA	CGCAAAAGCTTCCATA	TATGGAAGCTTTTGCG	5.53318	AGTAAAAGCTTCCATC	GATGGAAGCTTTTACT	2.11674	GCATAAAGCTTCACTT	AAGTGAAGCTTTATGC	4.38635	GCAGAAAGCTTCAGTA	TACTGAAGCTTTCTGC	3.54383	GTAAAAAGCTTCTATA	TATAGAAGCTTTTTAC	NA	GCGAAAAGCTTCTTCA	TGAAGAAGCTTTTCGC	1.0759	NA	0.239144	-0.548699	0.274095	0.668393	NA
AAAGCTTG	CAAGCTTT	3.26817	ACAAAAAGCTTGGTCG	CGACCAAGCTTTTTGT	5.00567	CGCAAAAGCTTGCATA	TATGCAAGCTTTTGCG	5.18692	AGTAAAAGCTTGCATC	GATGCAAGCTTTTACT	0.400381	GCATAAAGCTTGACTT	AAGTCAAGCTTTATGC	5.03106	GCAGAAAGCTTGAGTA	TACTCAAGCTTTCTGC	3.43767	GTAAAAAGCTTGTATA	TATACAAGCTTTTTAC	1.54716	GCGAAAAGCTTGTTCA	TGAACAAGCTTTTCGC	-0.7631	0.167402	-0.168531	-2.28263	0.811529	0.569701	-1.22108
AAAGCTTT	AAAGCTTT	4.67999	ACAAAAAGCTTTGTCG	CGACAAAGCTTTTTGT	4.59186	CGCAAAAGCTTTCATA	TATGAAAGCTTTTGCG	3.62051	AGTAAAAGCTTTCATC	GATGAAAGCTTTTACT	1.91782	GCATAAAGCTTTACTT	AAGTAAAGCTTTATGC	4.53488	GCAGAAAGCTTTAGTA	TACTAAAGCTTTCTGC	3.53494	GTAAAAAGCTTTTATA	TATAAAAGCTTTTTAC	2.22387	GCGAAAAGCTTTTTCA	TGAAAAAGCTTTTCGC	1.24874	-0.383932	-2.01281	-0.749662	0.397907	0.660128	-0.518666
AAAGGAAA	TTTCCTTT	3.29821	ACAAAAAGGAAAGTCG	CGACTTTCCTTTTTGT	NA	CGCAAAAGGAAACATA	TATGTTTCCTTTTGCG	5.56483	AGTAAAAGGAAACATC	GATGTTTCCTTTTACT	1.10476	GCATAAAGGAAAACTT	AAGTTTTCCTTTATGC	3.24383	GCAGAAAGGAAAAGTA	TACTTTTCCTTTCTGC	4.31371	GTAAAAAGGAAATATA	TATATTTCCTTTTTAC	NA	GCGAAAAGGAAATTCA	TGAATTTCCTTTTCGC	-0.720298	NA	0.276413	-1.57104	-0.678324	1.38416	NA
AAAGGAAC	GTTCCTTT	4.39974	ACAAAAAGGAACGTCG	CGACGTTCCTTTTTGT	NA	CGCAAAAGGAACCATA	TATGGTTCCTTTTGCG	4.19181	AGTAAAAGGAACCATC	GATGGTTCCTTTTACT	NA	GCATAAAGGAACACTT	AAGTGTTCCTTTATGC	NA	GCAGAAAGGAACAGTA	TACTGTTCCTTTCTGC	NA	GTAAAAAGGAACTATA	TATAGTTCCTTTTTAC	3.24217	GCGAAAAGGAACTTCA	TGAAGTTCCTTTTCGC	0.84938	NA	-1.34016	NA	NA	NA	0.538298
AAAGGAAG	CTTCCTTT	3.45606	ACAAAAAGGAAGGTCG	CGACCTTCCTTTTTGT	4.85652	CGCAAAAGGAAGCATA	TATGCTTCCTTTTGCG	4.97401	AGTAAAAGGAAGCATC	GATGCTTCCTTTTACT	1.74647	GCATAAAGGAAGACTT	AAGTCTTCCTTTATGC	4.23273	GCAGAAAGGAAGAGTA	TACTCTTCCTTTCTGC	4.39985	GTAAAAAGGAAGTATA	TATACTTCCTTTTTAC	3.53205	GCGAAAAGGAAGTTCA	TGAACTTCCTTTTCGC	-0.495367	-0.0313207	-0.419207	-0.922765	0.146031	1.46424	0.839193
AAAGGAAT	ATTCCTTT	4.68304	ACAAAAAGGAATGTCG	CGACATTCCTTTTTGT	3.31603	CGCAAAAGGAATCATA	TATGATTCCTTTTGCG	4.33722	AGTAAAAGGAATCATC	GATGATTCCTTTTACT	1.73869	GCATAAAGGAATACTT	AAGTATTCCTTTATGC	3.33517	GCAGAAAGGAATAGTA	TACTATTCCTTTCTGC	3.52157	GTAAAAAGGAATTATA	TATAATTCCTTTTTAC	3.15898	GCGAAAAGGAATTTCA	TGAAATTCCTTTTCGC	1.25309	-2.08379	-1.16895	-0.930626	-0.602185	0.647703	0.451949
AAAGGACA	TGTCCTTT	1.66938	ACAAAAAGGACAGTCG	CGACTGTCCTTTTTGT	NA	CGCAAAAGGACACATA	TATGTGTCCTTTTGCG	2.89789	AGTAAAAGGACACATC	GATGTGTCCTTTTACT	NA	GCATAAAGGACAACTT	AAGTTGTCCTTTATGC	NA	GCAGAAAGGACAAGTA	TACTTGTCCTTTCTGC	NA	GTAAAAAGGACATATA	TATATGTCCTTTTTAC	NA	GCGAAAAGGACATTCA	TGAATGTCCTTTTCGC	-3.04137	NA	-2.86361	NA	NA	NA	NA
AAAGGACC	GGTCCTTT	1.01258	ACAAAAAGGACCGTCG	CGACGGTCCTTTTTGT	NA	CGCAAAAGGACCCATA	TATGGGTCCTTTTGCG	NA	AGTAAAAGGACCCATC	GATGGGTCCTTTTACT	NA	GCATAAAGGACCACTT	AAGTGGTCCTTTATGC	NA	GCAGAAAGGACCAGTA	TACTGGTCCTTTCTGC	2.92331	GTAAAAAGGACCTATA	TATAGGTCCTTTTTAC	NA	GCGAAAAGGACCTTCA	TGAAGGTCCTTTTCGC	-3.97732	NA	NA	NA	NA	0.0914944	NA
AAAGGACG	CGTCCTTT	2.54752	ACAAAAAGGACGGTCG	CGACCGTCCTTTTTGT	3.91699	CGCAAAAGGACGCATA	TATGCGTCCTTTTGCG	2.7491	AGTAAAAGGACGCATC	GATGCGTCCTTTTACT	NA	GCATAAAGGACGACTT	AAGTCGTCCTTTATGC	NA	GCAGAAAGGACGAGTA	TACTCGTCCTTTCTGC	2.28896	GTAAAAAGGACGTATA	TATACGTCCTTTTTAC	1.66051	GCGAAAAGGACGTTCA	TGAACGTCCTTTTCGC	-1.79003	-1.2831	-3.03879	NA	NA	-0.498267	-1.10342
AAAGGACT	AGTCCTTT	0.247469	ACAAAAAGGACTGTCG	CGACAGTCCTTTTTGT	NA	CGCAAAAGGACTCATA	TATGAGTCCTTTTGCG	1.60055	AGTAAAAGGACTCATC	GATGAGTCCTTTTACT	NA	GCATAAAGGACTACTT	AAGTAGTCCTTTATGC	NA	GCAGAAAGGACTAGTA	TACTAGTCCTTTCTGC	NA	GTAAAAAGGACTTATA	TATAAGTCCTTTTTAC	1.00868	GCGAAAAGGACTTTCA	TGAAAGTCCTTTTCGC	-5.0676	NA	-4.39107	NA	NA	NA	-1.78001
AAAGGAGA	TCTCCTTT	3.25131	ACAAAAAGGAGAGTCG	CGACTCTCCTTTTTGT	3.69095	CGCAAAAGGAGACATA	TATGTCTCCTTTTGCG	4.57775	AGTAAAAGGAGACATC	GATGTCTCCTTTTACT	2.60271	GCATAAAGGAGAACTT	AAGTTCTCCTTTATGC	NA	GCAGAAAGGAGAAGTA	TACTTCTCCTTTCTGC	3.96271	GTAAAAAGGAGATATA	TATATCTCCTTTTTAC	NA	GCGAAAAGGAGATTCA	TGAATCTCCTTTTCGC	-0.787128	-1.58427	-0.885763	-0.0577586	NA	1.05783	NA
AAAGGAGC	GCTCCTTT	2.36711	ACAAAAAGGAGCGTCG	CGACGCTCCTTTTTGT	4.76095	CGCAAAAGGAGCCATA	TATGGCTCCTTTTGCG	2.23832	AGTAAAAGGAGCCATC	GATGGCTCCTTTTACT	0.756226	GCATAAAGGAGCACTT	AAGTGCTCCTTTATGC	NA	GCAGAAAGGAGCAGTA	TACTGCTCCTTTCTGC	2.21291	GTAAAAAGGAGCTATA	TATAGCTCCTTTTTAC	2.82696	GCGAAAAGGAGCTTCA	TGAAGCTCCTTTTCGC	-2.04711	-0.158649	-3.64017	-1.92314	NA	-0.568971	0.107319
AAAGGAGG	CCTCCTTT	3.75111	ACAAAAAGGAGGGTCG	CGACCCTCCTTTTTGT	4.60028	CGCAAAAGGAGGCATA	TATGCCTCCTTTTGCG	5.05174	AGTAAAAGGAGGCATC	GATGCCTCCTTTTACT	NA	GCATAAAGGAGGACTT	AAGTCCTCCTTTATGC	2.82765	GCAGAAAGGAGGAGTA	TACTCCTCCTTTCTGC	1.38401	GTAAAAAGGAGGTATA	TATACCTCCTTTTTAC	1.418	GCGAAAAGGAGGTTCA	TGAACCTCCTTTTCGC	-0.0749112	-0.372723	-0.327691	NA	-1.02526	-1.3396	-1.35514
AAAGGAGT	ACTCCTTT	1.68679	ACAAAAAGGAGTGTCG	CGACACTCCTTTTTGT	NA	CGCAAAAGGAGTCATA	TATGACTCCTTTTGCG	2.91499	AGTAAAAGGAGTCATC	GATGACTCCTTTTACT	NA	GCATAAAGGAGTACTT	AAGTACTCCTTTATGC	1.07782	GCAGAAAGGAGTAGTA	TACTACTCCTTTCTGC	NA	GTAAAAAGGAGTTATA	TATAACTCCTTTTTAC	NA	GCGAAAAGGAGTTTCA	TGAAACTCCTTTTCGC	-3.01657	NA	-2.84347	NA	-2.48394	NA	NA
AAAGGATA	TATCCTTT	NA	ACAAAAAGGATAGTCG	CGACTATCCTTTTTGT	NA	CGCAAAAGGATACATA	TATGTATCCTTTTGCG	1.29948	AGTAAAAGGATACATC	GATGTATCCTTTTACT	NA	GCATAAAGGATAACTT	AAGTTATCCTTTATGC	1.75946	GCAGAAAGGATAAGTA	TACTTATCCTTTCTGC	2.48522	GTAAAAAGGATATATA	TATATATCCTTTTTAC	NA	GCGAAAAGGATATTCA	TGAATATCCTTTTCGC	NA	NA	-4.74555	NA	-1.91572	-0.3158	NA
AAAGGATC	GATCCTTT	4.04956	ACAAAAAGGATCGTCG	CGACGATCCTTTTTGT	5.424	CGCAAAAGGATCCATA	TATGGATCCTTTTGCG	5.17707	AGTAAAAGGATCCATC	GATGGATCCTTTTACT	1.88002	GCATAAAGGATCACTT	AAGTGATCCTTTATGC	4.28868	GCAGAAAGGATCAGTA	TACTGATCCTTTCTGC	3.17833	GTAAAAAGGATCTATA	TATAGATCCTTTTTAC	NA	GCGAAAAGGATCTTCA	TGAAGATCCTTTTCGC	0.350369	0.724763	-0.180136	-0.787849	0.192675	0.328587	NA
AAAGGATG	CATCCTTT	1.66299	ACAAAAAGGATGGTCG	CGACCATCCTTTTTGT	NA	CGCAAAAGGATGCATA	TATGCATCCTTTTGCG	1.79432	AGTAAAAGGATGCATC	GATGCATCCTTTTACT	0.648379	GCATAAAGGATGACTT	AAGTCATCCTTTATGC	4.53386	GCAGAAAGGATGAGTA	TACTCATCCTTTCTGC	2.38968	GTAAAAAGGATGTATA	TATACATCCTTTTTAC	2.19919	GCGAAAAGGATGTTCA	TGAACATCCTTTTCGC	-3.05048	NA	-4.16293	-2.03209	0.397061	-0.404625	-0.544287
AAAGGATT	AATCCTTT	NA	ACAAAAAGGATTGTCG	CGACAATCCTTTTTGT	NA	CGCAAAAGGATTCATA	TATGAATCCTTTTGCG	NA	AGTAAAAGGATTCATC	GATGAATCCTTTTACT	-0.151325	GCATAAAGGATTACTT	AAGTAATCCTTTATGC	2.42087	GCAGAAAGGATTAGTA	TACTAATCCTTTCTGC	1.82473	GTAAAAAGGATTTATA	TATAAATCCTTTTTAC	0.481541	GCGAAAAGGATTTTCA	TGAAAATCCTTTTCGC	NA	NA	NA	-2.83998	-1.36436	-0.929866	-2.32717
AAAGGCAA	TTGCCTTT	3.9296	ACAAAAAGGCAAGTCG	CGACTTGCCTTTTTGT	NA	CGCAAAAGGCAACATA	TATGTTGCCTTTTGCG	5.06888	AGTAAAAGGCAACATC	GATGTTGCCTTTTACT	1.686	GCATAAAGGCAAACTT	AAGTTTGCCTTTATGC	4.51167	GCAGAAAGGCAAAGTA	TACTTTGCCTTTCTGC	3.4642	GTAAAAAGGCAATATA	TATATTGCCTTTTTAC	NA	GCGAAAAGGCAATTCA	TGAATTGCCTTTTCGC	0.179432	NA	-0.307508	-0.98385	0.378558	0.59436	NA
AAAGGCAC	GTGCCTTT	5.45636	ACAAAAAGGCACGTCG	CGACGTGCCTTTTTGT	NA	CGCAAAAGGCACCATA	TATGGTGCCTTTTGCG	5.09107	AGTAAAAGGCACCATC	GATGGTGCCTTTTACT	2.62351	GCATAAAGGCACACTT	AAGTGTGCCTTTATGC	NA	GCAGAAAGGCACAGTA	TACTGTGCCTTTCTGC	3.40943	GTAAAAAGGCACTATA	TATAGTGCCTTTTTAC	3.09264	GCGAAAAGGCACTTCA	TGAAGTGCCTTTTCGC	2.35507	NA	-0.281392	-0.0367469	NA	0.543443	0.383089
AAAGGCAG	CTGCCTTT	3.58138	ACAAAAAGGCAGGTCG	CGACCTGCCTTTTTGT	4.83441	CGCAAAAGGCAGCATA	TATGCTGCCTTTTGCG	5.53512	AGTAAAAGGCAGCATC	GATGCTGCCTTTTACT	0.838484	GCATAAAGGCAGACTT	AAGTCTGCCTTTATGC	NA	GCAGAAAGGCAGAGTA	TACTCTGCCTTTCTGC	3.42759	GTAAAAAGGCAGTATA	TATACTGCCTTTTTAC	1.31453	GCGAAAAGGCAGTTCA	TGAACTGCCTTTTCGC	-0.31678	-0.0607748	0.241424	-1.84004	NA	0.560323	-1.46255
AAAGGCAT	ATGCCTTT	4.09794	ACAAAAAGGCATGTCG	CGACATGCCTTTTTGT	4.73067	CGCAAAAGGCATCATA	TATGATGCCTTTTGCG	5.0425	AGTAAAAGGCATCATC	GATGATGCCTTTTACT	2.74697	GCATAAAGGCATACTT	AAGTATGCCTTTATGC	4.95775	GCAGAAAGGCATAGTA	TACTATGCCTTTCTGC	3.44103	GTAAAAAGGCATTATA	TATAATGCCTTTTTAC	2.68195	GCGAAAAGGCATTTCA	TGAAATGCCTTTTCGC	0.419313	-0.198999	-0.338575	0.0879802	0.750423	0.572824	-0.0431965
AAAGGCCA	TGGCCTTT	4.66553	ACAAAAAGGCCAGTCG	CGACTGGCCTTTTTGT	NA	CGCAAAAGGCCACATA	TATGTGGCCTTTTGCG	6.08444	AGTAAAAGGCCACATC	GATGTGGCCTTTTACT	0.562371	GCATAAAGGCCAACTT	AAGTTGGCCTTTATGC	NA	GCAGAAAGGCCAAGTA	TACTTGGCCTTTCTGC	3.16367	GTAAAAAGGCCATATA	TATATGGCCTTTTTAC	1.88462	GCGAAAAGGCCATTCA	TGAATGGCCTTTTCGC	1.22813	NA	0.888194	-2.11898	NA	0.314959	-0.870804
AAAGGCCC	GGGCCTTT	4.88435	ACAAAAAGGCCCGTCG	CGACGGGCCTTTTTGT	NA	CGCAAAAGGCCCCATA	TATGGGGCCTTTTGCG	5.4388	AGTAAAAGGCCCCATC	GATGGGGCCTTTTACT	1.05238	GCATAAAGGCCCACTT	AAGTGGGCCTTTATGC	4.50752	GCAGAAAGGCCCAGTA	TACTGGGCCTTTCTGC	NA	GTAAAAAGGCCCTATA	TATAGGGCCTTTTTAC	0.577925	GCGAAAAGGCCCTTCA	TGAAGGGCCTTTTCGC	1.53995	NA	0.128023	-1.62396	0.375104	NA	-2.22713
AAAGGCCG	CGGCCTTT	3.94821	ACAAAAAGGCCGGTCG	CGACCGGCCTTTTTGT	NA	CGCAAAAGGCCGCATA	TATGCGGCCTTTTGCG	5.36984	AGTAAAAGGCCGCATC	GATGCGGCCTTTTACT	1.15403	GCATAAAGGCCGACTT	AAGTCGGCCTTTATGC	NA	GCAGAAAGGCCGAGTA	TACTCGGCCTTTCTGC	4.30439	GTAAAAAGGCCGTATA	TATACGGCCTTTTTAC	3.35372	GCGAAAAGGCCGTTCA	TGAACGGCCTTTTCGC	0.205947	NA	0.0468338	-1.52127	NA	1.3755	0.654094
AAAGGCCT	AGGCCTTT	3.93517	ACAAAAAGGCCTGTCG	CGACAGGCCTTTTTGT	4.90801	CGCAAAAGGCCTCATA	TATGAGGCCTTTTGCG	5.17186	AGTAAAAGGCCTCATC	GATGAGGCCTTTTACT	0.781408	GCATAAAGGCCTACTT	AAGTAGGCCTTTATGC	4.02078	GCAGAAAGGCCTAGTA	TACTAGGCCTTTCTGC	3.37893	GTAAAAAGGCCTTATA	TATAAGGCCTTTTTAC	1.74347	GCGAAAAGGCCTTTCA	TGAAAGGCCTTTTCGC	0.187367	0.0372894	-0.186271	-1.8977	-0.0306504	0.515089	-1.01731
AAAGGCGA	TCGCCTTT	3.80378	ACAAAAAGGCGAGTCG	CGACTCGCCTTTTTGT	NA	CGCAAAAGGCGACATA	TATGTCGCCTTTTGCG	5.51858	AGTAAAAGGCGACATC	GATGTCGCCTTTTACT	1.6192	GCATAAAGGCGAACTT	AAGTTCGCCTTTATGC	3.69305	GCAGAAAGGCGAAGTA	TACTTCGCCTTTCTGC	4.55797	GTAAAAAGGCGATATA	TATATCGCCTTTTTAC	NA	GCGAAAAGGCGATTCA	TGAATCGCCTTTTCGC	0.000133964	NA	0.221953	-1.05133	-0.303848	1.61125	NA
AAAGGCGC	GCGCCTTT	4.17029	ACAAAAAGGCGCGTCG	CGACGCGCCTTTTTGT	NA	CGCAAAAGGCGCCATA	TATGGCGCCTTTTGCG	NA	AGTAAAAGGCGCCATC	GATGGCGCCTTTTACT	2.11766	GCATAAAGGCGCACTT	AAGTGCGCCTTTATGC	NA	GCAGAAAGGCGCAGTA	TACTGCGCCTTTCTGC	4.24092	GTAAAAAGGCGCTATA	TATAGCGCCTTTTTAC	2.16291	GCGAAAAGGCGCTTCA	TGAAGCGCCTTTTCGC	0.522416	NA	NA	-0.547775	NA	1.31649	-0.581949
AAAGGCGG	CCGCCTTT	3.25977	ACAAAAAGGCGGGTCG	CGACCCGCCTTTTTGT	4.4047	CGCAAAAGGCGGCATA	TATGCCGCCTTTTGCG	4.89835	AGTAAAAGGCGGCATC	GATGCCGCCTTTTACT	2.65969	GCATAAAGGCGGACTT	AAGTCCGCCTTTATGC	4.63817	GCAGAAAGGCGGAGTA	TACTCCGCCTTTCTGC	3.41173	GTAAAAAGGCGGTATA	TATACCGCCTTTTTAC	1.65671	GCGAAAAGGCGGTTCA	TGAACCGCCTTTTCGC	-0.775074	-0.633301	-0.508288	-0.000201748	0.484014	0.545586	-1.10737
AAAGGCGT	ACGCCTTT	3.99271	ACAAAAAGGCGTGTCG	CGACACGCCTTTTTGT	5.05619	CGCAAAAGGCGTCATA	TATGACGCCTTTTGCG	5.00764	AGTAAAAGGCGTCATC	GATGACGCCTTTTACT	1.5635	GCATAAAGGCGTACTT	AAGTACGCCTTTATGC	4.30302	GCAGAAAGGCGTAGTA	TACTACGCCTTTCTGC	2.71382	GTAAAAAGGCGTTATA	TATAACGCCTTTTTAC	1.43294	GCGAAAAGGCGTTTCA	TGAAACGCCTTTTCGC	0.269361	0.234711	-0.379617	-1.10761	0.204626	-0.103267	-1.33964
AAAGGCTA	TAGCCTTT	3.46148	ACAAAAAGGCTAGTCG	CGACTAGCCTTTTTGT	5.2453	CGCAAAAGGCTACATA	TATGTAGCCTTTTGCG	5.0304	AGTAAAAGGCTACATC	GATGTAGCCTTTTACT	NA	GCATAAAGGCTAACTT	AAGTTAGCCTTTATGC	3.45488	GCAGAAAGGCTAAGTA	TACTTAGCCTTTCTGC	3.38459	GTAAAAAGGCTATATA	TATATAGCCTTTTTAC	2.10076	GCGAAAAGGCTATTCA	TGAATAGCCTTTTCGC	-0.487636	0.486672	-0.352823	NA	-0.502392	0.520353	-0.646458
AAAGGCTC	GAGCCTTT	2.80553	ACAAAAAGGCTCGTCG	CGACGAGCCTTTTTGT	NA	CGCAAAAGGCTCCATA	TATGGAGCCTTTTGCG	4.11567	AGTAAAAGGCTCCATC	GATGGAGCCTTTTACT	1.41308	GCATAAAGGCTCACTT	AAGTGAGCCTTTATGC	3.72861	GCAGAAAGGCTCAGTA	TACTGAGCCTTTCTGC	3.37798	GTAAAAAGGCTCTATA	TATAGAGCCTTTTTAC	NA	GCGAAAAGGCTCTTCA	TGAAGAGCCTTTTCGC	-1.42236	NA	-1.42982	-1.25956	-0.274211	0.514204	NA
AAAGGCTG	CAGCCTTT	3.74078	ACAAAAAGGCTGGTCG	CGACCAGCCTTTTTGT	5.02157	CGCAAAAGGCTGCATA	TATGCAGCCTTTTGCG	5.04047	AGTAAAAGGCTGCATC	GATGCAGCCTTTTACT	1.67991	GCATAAAGGCTGACTT	AAGTCAGCCTTTATGC	NA	GCAGAAAGGCTGAGTA	TACTCAGCCTTTCTGC	3.23136	GTAAAAAGGCTGTATA	TATACAGCCTTTTTAC	2.89611	GCGAAAAGGCTGTTCA	TGAACAGCCTTTTCGC	-0.0896293	0.188585	-0.340961	-0.990008	NA	0.37789	0.179101
AAAGGCTT	AAGCCTTT	2.83566	ACAAAAAGGCTTGTCG	CGACAAGCCTTTTTGT	NA	CGCAAAAGGCTTCATA	TATGAAGCCTTTTGCG	4.216	AGTAAAAGGCTTCATC	GATGAAGCCTTTTACT	0.407741	GCATAAAGGCTTACTT	AAGTAAGCCTTTATGC	3.86802	GCAGAAAGGCTTAGTA	TACTAAGCCTTTCTGC	3.70992	GTAAAAAGGCTTTATA	TATAAAGCCTTTTTAC	2.0413	GCGAAAAGGCTTTTCA	TGAAAAGCCTTTTCGC	-1.37943	NA	-1.31168	-2.27519	-0.157998	0.822812	-0.708173
AAAGGGAA	TTCCCTTT	4.3498	ACAAAAAGGGAAGTCG	CGACTTCCCTTTTTGT	NA	CGCAAAAGGGAACATA	TATGTTCCCTTTTGCG	4.99674	AGTAAAAGGGAACATC	GATGTTCCCTTTTACT	1.35086	GCATAAAGGGAAACTT	AAGTTTCCCTTTATGC	NA	GCAGAAAGGGAAAGTA	TACTTTCCCTTTCTGC	3.83833	GTAAAAAGGGAATATA	TATATTCCCTTTTTAC	2.95861	GCGAAAAGGGAATTCA	TGAATTCCCTTTTCGC	0.778217	NA	-0.392446	-1.32243	NA	0.942199	0.243979
AAAGGGAC	GTCCCTTT	3.71078	ACAAAAAGGGACGTCG	CGACGTCCCTTTTTGT	4.08725	CGCAAAAGGGACCATA	TATGGTCCCTTTTGCG	4.97706	AGTAAAAGGGACCATC	GATGGTCCCTTTTACT	1.37988	GCATAAAGGGACACTT	AAGTGTCCCTTTATGC	NA	GCAGAAAGGGACAGTA	TACTGTCCCTTTCTGC	3.97084	GTAAAAAGGGACTATA	TATAGTCCCTTTTTAC	2.55446	GCGAAAAGGGACTTCA	TGAAGTCCCTTTTCGC	-0.132381	-1.05625	-0.415627	-1.2931	NA	1.06539	-0.17553
AAAGGGAG	CTCCCTTT	3.65491	ACAAAAAGGGAGGTCG	CGACCTCCCTTTTTGT	5.63422	CGCAAAAGGGAGCATA	TATGCTCCCTTTTGCG	4.68296	AGTAAAAGGGAGCATC	GATGCTCCCTTTTACT	1.36636	GCATAAAGGGAGACTT	AAGTCTCCCTTTATGC	4.8347	GCAGAAAGGGAGAGTA	TACTCTCCCTTTCTGC	1.51624	GTAAAAAGGGAGTATA	TATACTCCCTTTTTAC	0.953298	GCGAAAAGGGAGTTCA	TGAACTCCCTTTTCGC	-0.211999	1.00486	-0.761885	-1.30677	0.647848	-1.21666	-1.8375
AAAGGGAT	ATCCCTTT	1.97793	ACAAAAAGGGATGTCG	CGACATCCCTTTTTGT	3.97064	CGCAAAAGGGATCATA	TATGATCCCTTTTGCG	4.82191	AGTAAAAGGGATCATC	GATGATCCCTTTTACT	1.09285	GCATAAAGGGATACTT	AAGTATCCCTTTATGC	3.86012	GCAGAAAGGGATAGTA	TACTATCCCTTTCTGC	2.73362	GTAAAAAGGGATTATA	TATAATCCCTTTTTAC	2.23184	GCGAAAAGGGATTTCA	TGAAATCCCTTTTCGC	-2.6017	-1.21163	-0.598294	-1.58307	-0.164581	-0.0848617	-0.510397
AAAGGGCA	TGCCCTTT	3.19604	ACAAAAAGGGCAGTCG	CGACTGCCCTTTTTGT	4.42261	CGCAAAAGGGCACATA	TATGTGCCCTTTTGCG	5.12109	AGTAAAAGGGCACATC	GATGTGCCCTTTTACT	1.2885	GCATAAAGGGCAACTT	AAGTTGCCCTTTATGC	NA	GCAGAAAGGGCAAGTA	TACTTGCCCTTTCTGC	1.48637	GTAAAAAGGGCATATA	TATATGCCCTTTTTAC	2.04329	GCGAAAAGGGCATTCA	TGAATGCCCTTTTCGC	-0.865895	-0.609435	-0.24604	-1.38542	NA	-1.24444	-0.706109
AAAGGGCC	GGCCCTTT	3.42765	ACAAAAAGGGCCGTCG	CGACGGCCCTTTTTGT	4.57037	CGCAAAAGGGCCCATA	TATGGGCCCTTTTGCG	4.4959	AGTAAAAGGGCCCATC	GATGGGCCCTTTTACT	1.24229	GCATAAAGGGCCACTT	AAGTGGCCCTTTATGC	3.23338	GCAGAAAGGGCCAGTA	TACTGGCCCTTTCTGC	2.75825	GTAAAAAGGGCCTATA	TATAGGCCCTTTTTAC	2.80413	GCGAAAAGGGCCTTCA	TGAAGGCCCTTTTCGC	-0.535842	-0.412573	-0.982129	-1.4321	-0.687037	-0.0619616	0.0836318
AAAGGGCG	CGCCCTTT	3.79567	ACAAAAAGGGCGGTCG	CGACCGCCCTTTTTGT	5.00897	CGCAAAAGGGCGCATA	TATGCGCCCTTTTGCG	4.10203	AGTAAAAGGGCGCATC	GATGCGCCCTTTTACT	1.76323	GCATAAAGGGCGACTT	AAGTCGCCCTTTATGC	3.99729	GCAGAAAGGGCGAGTA	TACTCGCCCTTTCTGC	2.01753	GTAAAAAGGGCGTATA	TATACGCCCTTTTTAC	1.52182	GCGAAAAGGGCGTTCA	TGAACGCCCTTTTCGC	-0.0114109	0.171805	-1.44587	-0.905827	-0.050233	-0.750618	-1.24738
AAAGGGCT	AGCCCTTT	3.04501	ACAAAAAGGGCTGTCG	CGACAGCCCTTTTTGT	NA	CGCAAAAGGGCTCATA	TATGAGCCCTTTTGCG	4.45279	AGTAAAAGGGCTCATC	GATGAGCCCTTTTACT	1.38984	GCATAAAGGGCTACTT	AAGTAGCCCTTTATGC	NA	GCAGAAAGGGCTAGTA	TACTAGCCCTTTCTGC	2.15928	GTAAAAAGGGCTTATA	TATAAGCCCTTTTTAC	NA	GCGAAAAGGGCTTTCA	TGAAAGCCCTTTTCGC	-1.08111	NA	-1.03289	-1.28304	NA	-0.618827	NA
AAAGGGGA	TCCCCTTT	3.2214	ACAAAAAGGGGAGTCG	CGACTCCCCTTTTTGT	5.29973	CGCAAAAGGGGACATA	TATGTCCCCTTTTGCG	5.65418	AGTAAAAGGGGACATC	GATGTCCCCTTTTACT	2.55799	GCATAAAGGGGAACTT	AAGTTCCCCTTTATGC	5.12756	GCAGAAAGGGGAAGTA	TACTTCCCCTTTCTGC	3.01298	GTAAAAAGGGGATATA	TATATCCCCTTTTTAC	1.88855	GCGAAAAGGGGATTCA	TGAATCCCCTTTTCGC	-0.82975	0.559196	0.381605	-0.102939	0.891979	0.174858	-0.866729
AAAGGGGC	GCCCCTTT	3.33245	ACAAAAAGGGGCGTCG	CGACGCCCCTTTTTGT	4.56387	CGCAAAAGGGGCCATA	TATGGCCCCTTTTGCG	4.87022	AGTAAAAGGGGCCATC	GATGGCCCCTTTTACT	2.82279	GCATAAAGGGGCACTT	AAGTGCCCCTTTATGC	4.74845	GCAGAAAGGGGCAGTA	TACTGCCCCTTTCTGC	3.11829	GTAAAAAGGGGCTATA	TATAGCCCCTTTTTAC	3.05092	GCGAAAAGGGGCTTCA	TGAAGCCCCTTTTCGC	-0.671511	-0.421225	-0.541411	0.164572	0.575945	0.272766	0.339791
AAAGGGGG	CCCCCTTT	3.37447	ACAAAAAGGGGGGTCG	CGACCCCCCTTTTTGT	4.88344	CGCAAAAGGGGGCATA	TATGCCCCCTTTTGCG	5.36874	AGTAAAAGGGGGCATC	GATGCCCCCTTTTACT	2.58167	GCATAAAGGGGGACTT	AAGTCCCCCTTTATGC	3.99476	GCAGAAAGGGGGAGTA	TACTCCCCCTTTCTGC	2.29877	GTAAAAAGGGGGTATA	TATACCCCCTTTTTAC	0.838675	GCGAAAAGGGGGTTCA	TGAACCCCCTTTTCGC	-0.61162	0.00454905	0.0455409	-0.0790154	-0.0523383	-0.489149	-1.95647
AAAGGGGT	ACCCCTTT	2.73178	ACAAAAAGGGGTGTCG	CGACACCCCTTTTTGT	4.43528	CGCAAAAGGGGTCATA	TATGACCCCTTTTGCG	4.58677	AGTAAAAGGGGTCATC	GATGACCCCTTTTACT	2.17815	GCATAAAGGGGTACTT	AAGTACCCCTTTATGC	4.45308	GCAGAAAGGGGTAGTA	TACTACCCCTTTCTGC	1.44974	GTAAAAAGGGGTTATA	TATAACCCCTTTTTAC	1.56984	GCGAAAAGGGGTTTCA	TGAAACCCCTTTTCGC	-1.52746	-0.592561	-0.875143	-0.486669	0.329722	-1.2785	-1.19753
AAAGGGTA	TACCCTTT	1.80374	ACAAAAAGGGTAGTCG	CGACTACCCTTTTTGT	NA	CGCAAAAGGGTACATA	TATGTACCCTTTTGCG	5.02144	AGTAAAAGGGTACATC	GATGTACCCTTTTACT	NA	GCATAAAGGGTAACTT	AAGTTACCCTTTATGC	2.42101	GCAGAAAGGGTAAGTA	TACTTACCCTTTCTGC	1.4574	GTAAAAAGGGTATATA	TATATACCCTTTTTAC	0.925794	GCGAAAAGGGTATTCA	TGAATACCCTTTTCGC	-2.84992	NA	-0.363371	NA	-1.36425	-1.27137	-1.86605
AAAGGGTC	GACCCTTT	3.09458	ACAAAAAGGGTCGTCG	CGACGACCCTTTTTGT	5.27209	CGCAAAAGGGTCCATA	TATGGACCCTTTTGCG	4.50383	AGTAAAAGGGTCCATC	GATGGACCCTTTTACT	1.7534	GCATAAAGGGTCACTT	AAGTGACCCTTTATGC	2.79356	GCAGAAAGGGTCAGTA	TACTGACCCTTTCTGC	2.23297	GTAAAAAGGGTCTATA	TATAGACCCTTTTTAC	2.32747	GCGAAAAGGGTCTTCA	TGAAGACCCTTTTCGC	-1.01047	0.522372	-0.972791	-0.915762	-1.05368	-0.550318	-0.411137
AAAGGGTG	CACCCTTT	2.85846	ACAAAAAGGGTGGTCG	CGACCACCCTTTTTGT	4.50558	CGCAAAAGGGTGCATA	TATGCACCCTTTTGCG	4.49426	AGTAAAAGGGTGCATC	GATGCACCCTTTTACT	2.48345	GCATAAAGGGTGACTT	AAGTCACCCTTTATGC	4.57652	GCAGAAAGGGTGAGTA	TACTCACCCTTTCTGC	3.28044	GTAAAAAGGGTGTATA	TATACACCCTTTTTAC	2.42419	GCGAAAAGGGTGTTCA	TGAACACCCTTTTCGC	-1.34694	-0.498895	-0.984066	-0.17824	0.432621	0.423519	-0.310745
AAAGGGTT	AACCCTTT	3.04625	ACAAAAAGGGTTGTCG	CGACAACCCTTTTTGT	5.20051	CGCAAAAGGGTTCATA	TATGAACCCTTTTGCG	4.18633	AGTAAAAGGGTTCATC	GATGAACCCTTTTACT	0.678615	GCATAAAGGGTTACTT	AAGTAACCCTTTATGC	3.25473	GCAGAAAGGGTTAGTA	TACTAACCCTTTCTGC	1.56437	GTAAAAAGGGTTTATA	TATAAACCCTTTTTAC	1.52685	GCGAAAAGGGTTTTCA	TGAAAACCCTTTTCGC	-1.07934	0.426993	-1.34662	-2.00155	-0.669244	-1.17192	-1.24217
AAAGGTAA	TTACCTTT	0.522567	ACAAAAAGGTAAGTCG	CGACTTACCTTTTTGT	NA	CGCAAAAGGTAACATA	TATGTTACCTTTTGCG	NA	AGTAAAAGGTAACATC	GATGTTACCTTTTACT	NA	GCATAAAGGTAAACTT	AAGTTTACCTTTATGC	NA	GCAGAAAGGTAAAGTA	TACTTTACCTTTCTGC	NA	GTAAAAAGGTAATATA	TATATTACCTTTTTAC	NA	GCGAAAAGGTAATTCA	TGAATTACCTTTTCGC	-4.67558	NA	NA	NA	NA	NA	NA
AAAGGTAC	GTACCTTT	3.18215	ACAAAAAGGTACGTCG	CGACGTACCTTTTTGT	3.63867	CGCAAAAGGTACCATA	TATGGTACCTTTTGCG	3.6071	AGTAAAAGGTACCATC	GATGGTACCTTTTACT	-0.150156	GCATAAAGGTACACTT	AAGTGTACCTTTATGC	NA	GCAGAAAGGTACAGTA	TACTGTACCTTTCTGC	NA	GTAAAAAGGTACTATA	TATAGTACCTTTTTAC	NA	GCGAAAAGGTACTTCA	TGAAGTACCTTTTCGC	-0.885689	-1.65392	-2.02859	-2.8388	NA	NA	NA
AAAGGTAG	CTACCTTT	1.96283	ACAAAAAGGTAGGTCG	CGACCTACCTTTTTGT	2.49227	CGCAAAAGGTAGCATA	TATGCTACCTTTTGCG	3.06692	AGTAAAAGGTAGCATC	GATGCTACCTTTTACT	0.530572	GCATAAAGGTAGACTT	AAGTCTACCTTTATGC	NA	GCAGAAAGGTAGAGTA	TACTCTACCTTTCTGC	NA	GTAAAAAGGTAGTATA	TATACTACCTTTTTAC	NA	GCGAAAAGGTAGTTCA	TGAACTACCTTTTCGC	-2.62321	-3.18133	-2.6646	-2.15111	NA	NA	NA
AAAGGTAT	ATACCTTT	2.91293	ACAAAAAGGTATGTCG	CGACATACCTTTTTGT	3.49603	CGCAAAAGGTATCATA	TATGATACCTTTTGCG	3.4041	AGTAAAAGGTATCATC	GATGATACCTTTTACT	NA	GCATAAAGGTATACTT	AAGTATACCTTTATGC	2.06808	GCAGAAAGGTATAGTA	TACTATACCTTTCTGC	NA	GTAAAAAGGTATTATA	TATAATACCTTTTTAC	1.25027	GCGAAAAGGTATTTCA	TGAAATACCTTTTCGC	-1.26932	-1.84396	-2.2676	NA	-1.65845	NA	-1.52924
AAAGGTCA	TGACCTTT	3.95369	ACAAAAAGGTCAGTCG	CGACTGACCTTTTTGT	4.84411	CGCAAAAGGTCACATA	TATGTGACCTTTTGCG	4.16441	AGTAAAAGGTCACATC	GATGTGACCTTTTACT	1.43864	GCATAAAGGTCAACTT	AAGTTGACCTTTATGC	4.0653	GCAGAAAGGTCAAGTA	TACTTGACCTTTCTGC	3.18107	GTAAAAAGGTCATATA	TATATGACCTTTTTAC	2.95529	GCGAAAAGGTCATTCA	TGAATGACCTTTTCGC	0.213762	-0.0478562	-1.37243	-1.23375	0.00646259	0.331135	0.240532
AAAGGTCC	GGACCTTT	3.84686	ACAAAAAGGTCCGTCG	CGACGGACCTTTTTGT	NA	CGCAAAAGGTCCCATA	TATGGGACCTTTTGCG	5.3422	AGTAAAAGGTCCCATC	GATGGGACCTTTTACT	0.870523	GCATAAAGGTCCACTT	AAGTGGACCTTTATGC	4.26893	GCAGAAAGGTCCAGTA	TACTGGACCTTTCTGC	2.46836	GTAAAAAGGTCCTATA	TATAGGACCTTTTTAC	NA	GCGAAAAGGTCCTTCA	TGAAGGACCTTTTCGC	0.0615333	NA	0.0142917	-1.80767	0.176207	-0.331478	NA
AAAGGTCG	CGACCTTT	3.81745	ACAAAAAGGTCGGTCG	CGACCGACCTTTTTGT	4.47951	CGCAAAAGGTCGCATA	TATGCGACCTTTTGCG	4.6151	AGTAAAAGGTCGCATC	GATGCGACCTTTTACT	0.580861	GCATAAAGGTCGACTT	AAGTCGACCTTTATGC	3.17763	GCAGAAAGGTCGAGTA	TACTCGACCTTTCTGC	3.04825	GTAAAAAGGTCGTATA	TATACGACCTTTTTAC	0.922389	GCGAAAAGGTCGTTCA	TGAACGACCTTTTCGC	0.0196145	-0.533621	-0.841788	-2.1003	-0.733514	0.207652	-1.86958
AAAGGTCT	AGACCTTT	4.39576	ACAAAAAGGTCTGTCG	CGACAGACCTTTTTGT	3.91921	CGCAAAAGGTCTCATA	TATGAGACCTTTTGCG	5.0086	AGTAAAAGGTCTCATC	GATGAGACCTTTTACT	1.46806	GCATAAAGGTCTACTT	AAGTAGACCTTTATGC	3.62089	GCAGAAAGGTCTAGTA	TACTAGACCTTTCTGC	3.95485	GTAAAAAGGTCTTATA	TATAAGACCTTTTTAC	2.93604	GCGAAAAGGTCTTTCA	TGAAAGACCTTTTCGC	0.843711	-1.28015	-0.378485	-1.20403	-0.364003	1.05052	0.220546
AAAGGTGA	TCACCTTT	2.26122	ACAAAAAGGTGAGTCG	CGACTCACCTTTTTGT	NA	CGCAAAAGGTGACATA	TATGTCACCTTTTGCG	2.99658	AGTAAAAGGTGACATC	GATGTCACCTTTTACT	0.847606	GCATAAAGGTGAACTT	AAGTTCACCTTTATGC	NA	GCAGAAAGGTGAAGTA	TACTTCACCTTTCTGC	NA	GTAAAAAGGTGATATA	TATATCACCTTTTTAC	1.70876	GCGAAAAGGTGATTCA	TGAATCACCTTTTCGC	-2.19801	NA	-2.7474	-1.83083	NA	NA	-1.05334
AAAGGTGC	GCACCTTT	1.73145	ACAAAAAGGTGCGTCG	CGACGCACCTTTTTGT	3.90986	CGCAAAAGGTGCCATA	TATGGCACCTTTTGCG	3.54859	AGTAAAAGGTGCCATC	GATGGCACCTTTTACT	-0.513471	GCATAAAGGTGCACTT	AAGTGCACCTTTATGC	NA	GCAGAAAGGTGCAGTA	TACTGCACCTTTCTGC	0.945575	GTAAAAAGGTGCTATA	TATAGCACCTTTTTAC	1.19575	GCGAAAAGGTGCTTCA	TGAAGCACCTTTTCGC	-2.95293	-1.29261	-2.09748	-3.20583	NA	-1.74722	-1.58583
AAAGGTGG	CCACCTTT	2.77938	ACAAAAAGGTGGGTCG	CGACCCACCTTTTTGT	3.92243	CGCAAAAGGTGGCATA	TATGCCACCTTTTGCG	3.49506	AGTAAAAGGTGGCATC	GATGCCACCTTTTACT	NA	GCATAAAGGTGGACTT	AAGTCCACCTTTATGC	NA	GCAGAAAGGTGGAGTA	TACTCCACCTTTCTGC	0.906816	GTAAAAAGGTGGTATA	TATACCACCTTTTTAC	0.932291	GCGAAAAGGTGGTTCA	TGAACCACCTTTTCGC	-1.45963	-1.27586	-2.16051	NA	NA	-1.78326	-1.8593
AAAGGTGT	ACACCTTT	2.33055	ACAAAAAGGTGTGTCG	CGACACACCTTTTTGT	NA	CGCAAAAGGTGTCATA	TATGACACCTTTTGCG	2.83094	AGTAAAAGGTGTCATC	GATGACACCTTTTACT	NA	GCATAAAGGTGTACTT	AAGTACACCTTTATGC	NA	GCAGAAAGGTGTAGTA	TACTACACCTTTCTGC	0.806072	GTAAAAAGGTGTTATA	TATAACACCTTTTTAC	-0.334917	GCGAAAAGGTGTTTCA	TGAAACACCTTTTCGC	-2.09921	NA	-2.94244	NA	NA	-1.87692	-3.17464
AAAGGTTA	TAACCTTT	3.39472	ACAAAAAGGTTAGTCG	CGACTAACCTTTTTGT	5.09331	CGCAAAAGGTTACATA	TATGTAACCTTTTGCG	4.56661	AGTAAAAGGTTACATC	GATGTAACCTTTTACT	NA	GCATAAAGGTTAACTT	AAGTTAACCTTTATGC	2.24827	GCAGAAAGGTTAAGTA	TACTTAACCTTTCTGC	2.25048	GTAAAAAGGTTATATA	TATATAACCTTTTTAC	0.0900889	GCGAAAAGGTTATTCA	TGAATAACCTTTTCGC	-0.582774	0.284173	-0.89888	NA	-1.50824	-0.534042	-2.73349
AAAGGTTC	GAACCTTT	4.40287	ACAAAAAGGTTCGTCG	CGACGAACCTTTTTGT	5.77263	CGCAAAAGGTTCCATA	TATGGAACCTTTTGCG	5.40255	AGTAAAAGGTTCCATC	GATGGAACCTTTTACT	0.633161	GCATAAAGGTTCACTT	AAGTGAACCTTTATGC	4.08074	GCAGAAAGGTTCAGTA	TACTGAACCTTTCTGC	3.09021	GTAAAAAGGTTCTATA	TATAGAACCTTTTTAC	2.90536	GCGAAAAGGTTCTTCA	TGAAGAACCTTTTCGC	0.853847	1.18926	0.0853415	-2.04747	0.0193352	0.246659	0.188696
AAAGGTTG	CAACCTTT	3.43847	ACAAAAAGGTTGGTCG	CGACCAACCTTTTTGT	4.38849	CGCAAAAGGTTGCATA	TATGCAACCTTTTGCG	4.24472	AGTAAAAGGTTGCATC	GATGCAACCTTTTACT	NA	GCATAAAGGTTGACTT	AAGTCAACCTTTATGC	3.27983	GCAGAAAGGTTGAGTA	TACTCAACCTTTCTGC	2.00813	GTAAAAAGGTTGTATA	TATACAACCTTTTTAC	1.8915	GCGAAAAGGTTGTTCA	TGAACAACCTTTTCGC	-0.520424	-0.654901	-1.27787	NA	-0.648321	-0.759352	-0.863661
AAAGGTTT	AAACCTTT	3.71036	ACAAAAAGGTTTGTCG	CGACAAACCTTTTTGT	4.54937	CGCAAAAGGTTTCATA	TATGAAACCTTTTGCG	4.49474	AGTAAAAGGTTTCATC	GATGAAACCTTTTACT	1.26196	GCATAAAGGTTTACTT	AAGTAAACCTTTATGC	3.17548	GCAGAAAGGTTTAGTA	TACTAAACCTTTCTGC	2.07879	GTAAAAAGGTTTTATA	TATAAAACCTTTTTAC	1.09565	GCGAAAAGGTTTTTCA	TGAAAAACCTTTTCGC	-0.132979	-0.440551	-0.9835	-1.41224	-0.735306	-0.693659	-1.68974
AAAGTAAA	TTTACTTT	4.42566	ACAAAAAGTAAAGTCG	CGACTTTACTTTTTGT	NA	CGCAAAAGTAAACATA	TATGTTTACTTTTGCG	5.60446	AGTAAAAGTAAACATC	GATGTTTACTTTTACT	NA	GCATAAAGTAAAACTT	AAGTTTTACTTTATGC	NA	GCAGAAAGTAAAAGTA	TACTTTTACTTTCTGC	2.67076	GTAAAAAGTAAATATA	TATATTTACTTTTTAC	NA	GCGAAAAGTAAATTCA	TGAATTTACTTTTCGC	0.88631	NA	0.323075	NA	NA	-0.143302	NA
AAAGTAAC	GTTACTTT	4.73794	ACAAAAAGTAACGTCG	CGACGTTACTTTTTGT	NA	CGCAAAAGTAACCATA	TATGGTTACTTTTGCG	4.14491	AGTAAAAGTAACCATC	GATGGTTACTTTTACT	0.870897	GCATAAAGTAACACTT	AAGTGTTACTTTATGC	NA	GCAGAAAGTAACAGTA	TACTGTTACTTTCTGC	NA	GTAAAAAGTAACTATA	TATAGTTACTTTTTAC	1.77631	GCGAAAAGTAACTTCA	TGAAGTTACTTTTCGC	1.33131	NA	-1.39538	-1.8073	NA	NA	-0.983224
AAAGTAAG	CTTACTTT	4.37515	ACAAAAAGTAAGGTCG	CGACCTTACTTTTTGT	3.24534	CGCAAAAGTAAGCATA	TATGCTTACTTTTGCG	5.45271	AGTAAAAGTAAGCATC	GATGCTTACTTTTACT	1.75254	GCATAAAGTAAGACTT	AAGTCTTACTTTATGC	3.91161	GCAGAAAGTAAGAGTA	TACTCTTACTTTCTGC	NA	GTAAAAAGTAAGTATA	TATACTTACTTTTTAC	1.51046	GCGAAAAGTAAGTTCA	TGAACTTACTTTTCGC	0.814344	-2.17798	0.144401	-0.916631	-0.12166	NA	-1.25917
AAAGTAAT	ATTACTTT	3.93525	ACAAAAAGTAATGTCG	CGACATTACTTTTTGT	NA	CGCAAAAGTAATCATA	TATGATTACTTTTGCG	4.59297	AGTAAAAGTAATCATC	GATGATTACTTTTACT	0.357544	GCATAAAGTAATACTT	AAGTATTACTTTATGC	NA	GCAGAAAGTAATAGTA	TACTATTACTTTCTGC	1.68899	GTAAAAAGTAATTATA	TATAATTACTTTTTAC	2.10476	GCGAAAAGTAATTTCA	TGAAATTACTTTTCGC	0.187479	NA	-0.867847	-2.3259	NA	-1.05606	-0.642306
AAAGTACA	TGTACTTT	5.70037	ACAAAAAGTACAGTCG	CGACTGTACTTTTTGT	4.15736	CGCAAAAGTACACATA	TATGTGTACTTTTGCG	4.86674	AGTAAAAGTACACATC	GATGTGTACTTTTACT	NA	GCATAAAGTACAACTT	AAGTTGTACTTTATGC	NA	GCAGAAAGTACAAGTA	TACTTGTACTTTCTGC	3.73388	GTAAAAAGTACATATA	TATATGTACTTTTTAC	2.70415	GCGAAAAGTACATTCA	TGAATGTACTTTTCGC	2.70277	-0.962842	-0.545514	NA	NA	0.845086	-0.0201457
AAAGTACC	GGTACTTT	3.9707	ACAAAAAGTACCGTCG	CGACGGTACTTTTTGT	NA	CGCAAAAGTACCCATA	TATGGGTACTTTTGCG	4.11276	AGTAAAAGTACCCATC	GATGGGTACTTTTACT	NA	GCATAAAGTACCACTT	AAGTGGTACTTTATGC	NA	GCAGAAAGTACCAGTA	TACTGGTACTTTCTGC	NA	GTAAAAAGTACCTATA	TATAGGTACTTTTTAC	NA	GCGAAAAGTACCTTCA	TGAAGGTACTTTTCGC	0.238005	NA	-1.43324	NA	NA	NA	NA
AAAGTACG	CGTACTTT	4.01594	ACAAAAAGTACGGTCG	CGACCGTACTTTTTGT	4.81964	CGCAAAAGTACGCATA	TATGCGTACTTTTGCG	4.75545	AGTAAAAGTACGCATC	GATGCGTACTTTTACT	1.79408	GCATAAAGTACGACTT	AAGTCGTACTTTATGC	NA	GCAGAAAGTACGAGTA	TACTCGTACTTTCTGC	1.54706	GTAAAAAGTACGTATA	TATACGTACTTTTTAC	2.0353	GCGAAAAGTACGTTCA	TGAACGTACTTTTCGC	0.302462	-0.0804545	-0.676546	-0.874668	NA	-1.18801	-0.714403
AAAGTACT	AGTACTTT	4.39064	ACAAAAAGTACTGTCG	CGACAGTACTTTTTGT	NA	CGCAAAAGTACTCATA	TATGAGTACTTTTGCG	5.53548	AGTAAAAGTACTCATC	GATGAGTACTTTTACT	NA	GCATAAAGTACTACTT	AAGTAGTACTTTATGC	NA	GCAGAAAGTACTAGTA	TACTAGTACTTTCTGC	3.25661	GTAAAAAGTACTTATA	TATAAGTACTTTTTAC	1.37308	GCGAAAAGTACTTTCA	TGAAAGTACTTTTCGC	0.836414	NA	0.241851	NA	NA	0.401364	-1.40177
AAAGTAGA	TCTACTTT	4.30185	ACAAAAAGTAGAGTCG	CGACTCTACTTTTTGT	3.32001	CGCAAAAGTAGACATA	TATGTCTACTTTTGCG	5.71948	AGTAAAAGTAGACATC	GATGTCTACTTTTACT	2.50821	GCATAAAGTAGAACTT	AAGTTCTACTTTATGC	NA	GCAGAAAGTAGAAGTA	TACTTCTACTTTCTGC	4.18158	GTAAAAAGTAGATATA	TATATCTACTTTTTAC	NA	GCGAAAAGTAGATTCA	TGAATCTACTTTTCGC	0.709885	-2.07849	0.458498	-0.153225	NA	1.26132	NA
AAAGTAGC	GCTACTTT	4.15206	ACAAAAAGTAGCGTCG	CGACGCTACTTTTTGT	NA	CGCAAAAGTAGCCATA	TATGGCTACTTTTGCG	4.65299	AGTAAAAGTAGCCATC	GATGGCTACTTTTACT	2.57629	GCATAAAGTAGCACTT	AAGTGCTACTTTATGC	NA	GCAGAAAGTAGCAGTA	TACTGCTACTTTCTGC	2.90296	GTAAAAAGTAGCTATA	TATAGCTACTTTTTAC	1.62295	GCGAAAAGTAGCTTCA	TGAAGCTACTTTTCGC	0.496441	NA	-0.79718	-0.0844482	NA	0.0725718	-1.14241
AAAGTAGG	CCTACTTT	4.23705	ACAAAAAGTAGGGTCG	CGACCCTACTTTTTGT	4.66696	CGCAAAAGTAGGCATA	TATGCCTACTTTTGCG	4.38157	AGTAAAAGTAGGCATC	GATGCCTACTTTTACT	1.22014	GCATAAAGTAGGACTT	AAGTCCTACTTTATGC	2.00496	GCAGAAAGTAGGAGTA	TACTCCTACTTTCTGC	NA	GTAAAAAGTAGGTATA	TATACCTACTTTTTAC	1.15057	GCGAAAAGTAGGTTCA	TGAACCTACTTTTCGC	0.617553	-0.283872	-1.11674	-1.45448	-1.71107	NA	-1.63273
AAAGTAGT	ACTACTTT	4.10598	ACAAAAAGTAGTGTCG	CGACACTACTTTTTGT	5.01205	CGCAAAAGTAGTCATA	TATGACTACTTTTGCG	4.04815	AGTAAAAGTAGTCATC	GATGACTACTTTTACT	NA	GCATAAAGTAGTACTT	AAGTACTACTTTATGC	3.69364	GCAGAAAGTAGTAGTA	TACTACTACTTTCTGC	1.85633	GTAAAAAGTAGTTATA	TATAACTACTTTTTAC	2.35827	GCGAAAAGTAGTTTCA	TGAAACTACTTTTCGC	0.430771	0.175898	-1.5093	NA	-0.303363	-0.900486	-0.379168
AAAGTATA	TATACTTT	4.1834	ACAAAAAGTATAGTCG	CGACTATACTTTTTGT	4.18314	CGCAAAAGTATACATA	TATGTATACTTTTGCG	5.1026	AGTAAAAGTATACATC	GATGTATACTTTTACT	1.88187	GCATAAAGTATAACTT	AAGTTATACTTTATGC	NA	GCAGAAAGTATAAGTA	TACTTATACTTTCTGC	4.68406	GTAAAAAGTATATATA	TATATATACTTTTTAC	1.75562	GCGAAAAGTATATTCA	TGAATATACTTTTCGC	0.541095	-0.9285	-0.267812	-0.785976	NA	1.72848	-1.00471
AAAGTATC	GATACTTT	4.77937	ACAAAAAGTATCGTCG	CGACGATACTTTTTGT	4.54174	CGCAAAAGTATCCATA	TATGGATACTTTTGCG	4.71217	AGTAAAAGTATCCATC	GATGGATACTTTTACT	2.19798	GCATAAAGTATCACTT	AAGTGATACTTTATGC	NA	GCAGAAAGTATCAGTA	TACTGATACTTTCTGC	3.22562	GTAAAAAGTATCTATA	TATAGATACTTTTTAC	3.19044	GCGAAAAGTATCTTCA	TGAAGATACTTTTCGC	1.39035	-0.450715	-0.727495	-0.466627	NA	0.372557	0.484604
AAAGTATG	CATACTTT	3.62181	ACAAAAAGTATGGTCG	CGACCATACTTTTTGT	4.74029	CGCAAAAGTATGCATA	TATGCATACTTTTGCG	5.35704	AGTAAAAGTATGCATC	GATGCATACTTTTACT	2.88689	GCATAAAGTATGACTT	AAGTCATACTTTATGC	4.35441	GCAGAAAGTATGAGTA	TACTCATACTTTCTGC	0.509666	GTAAAAAGTATGTATA	TATACATACTTTTTAC	2.8407	GCGAAAAGTATGTTCA	TGAACATACTTTTCGC	-0.259168	-0.186176	0.0317616	0.229324	0.247468	-2.15249	0.121581
AAAGTATT	AATACTTT	4.61422	ACAAAAAGTATTGTCG	CGACAATACTTTTTGT	NA	CGCAAAAGTATTCATA	TATGAATACTTTTGCG	5.29868	AGTAAAAGTATTCATC	GATGAATACTTTTACT	2.39622	GCATAAAGTATTACTT	AAGTAATACTTTATGC	3.03888	GCAGAAAGTATTAGTA	TACTAATACTTTCTGC	3.23966	GTAAAAAGTATTTATA	TATAAATACTTTTTAC	1.58743	GCGAAAAGTATTTTCA	TGAAAATACTTTTCGC	1.15502	NA	-0.036953	-0.266364	-0.849174	0.385612	-1.17928
AAAGTCAA	TTGACTTT	3.98265	ACAAAAAGTCAAGTCG	CGACTTGACTTTTTGT	NA	CGCAAAAGTCAACATA	TATGTTGACTTTTGCG	4.79853	AGTAAAAGTCAACATC	GATGTTGACTTTTACT	1.96799	GCATAAAGTCAAACTT	AAGTTTGACTTTATGC	4.12905	GCAGAAAGTCAAAGTA	TACTTTGACTTTCTGC	NA	GTAAAAAGTCAATATA	TATATTGACTTTTTAC	NA	GCGAAAAGTCAATTCA	TGAATTGACTTTTCGC	0.255033	NA	-0.625817	-0.69898	0.0596079	NA	NA
AAAGTCAC	GTGACTTT	7.5983	ACAAAAAGTCACGTCG	CGACGTGACTTTTTGT	NA	CGCAAAAGTCACCATA	TATGGTGACTTTTGCG	5.46456	AGTAAAAGTCACCATC	GATGGTGACTTTTACT	2.39268	GCATAAAGTCACACTT	AAGTGTGACTTTATGC	NA	GCAGAAAGTCACAGTA	TACTGTGACTTTCTGC	2.89619	GTAAAAAGTCACTATA	TATAGTGACTTTTTAC	NA	GCGAAAAGTCACTTCA	TGAAGTGACTTTTCGC	5.40732	NA	0.158352	-0.269944	NA	0.0662815	NA
AAAGTCAG	CTGACTTT	3.85827	ACAAAAAGTCAGGTCG	CGACCTGACTTTTTGT	4.80309	CGCAAAAGTCAGCATA	TATGCTGACTTTTGCG	5.29466	AGTAAAAGTCAGCATC	GATGCTGACTTTTACT	1.92277	GCATAAAGTCAGACTT	AAGTCTGACTTTATGC	3.86661	GCAGAAAGTCAGAGTA	TACTCTGACTTTCTGC	2.12383	GTAAAAAGTCAGTATA	TATACTGACTTTTTAC	1.99053	GCGAAAAGTCAGTTCA	TGAACTGACTTTTCGC	0.0777837	-0.102498	-0.0416844	-0.744662	-0.159166	-0.651785	-0.760874
AAAGTCAT	ATGACTTT	4.84507	ACAAAAAGTCATGTCG	CGACATGACTTTTTGT	NA	CGCAAAAGTCATCATA	TATGATGACTTTTGCG	6.12727	AGTAAAAGTCATCATC	GATGATGACTTTTACT	2.45105	GCATAAAGTCATACTT	AAGTATGACTTTATGC	NA	GCAGAAAGTCATAGTA	TACTATGACTTTCTGC	3.10923	GTAAAAAGTCATTATA	TATAATGACTTTTTAC	NA	GCGAAAAGTCATTTCA	TGAAATGACTTTTCGC	1.48398	NA	0.938622	-0.210973	NA	0.264343	NA
AAAGTCCA	TGGACTTT	3.99788	ACAAAAAGTCCAGTCG	CGACTGGACTTTTTGT	NA	CGCAAAAGTCCACATA	TATGTGGACTTTTGCG	5.28456	AGTAAAAGTCCACATC	GATGTGGACTTTTACT	1.65555	GCATAAAGTCCAACTT	AAGTTGGACTTTATGC	NA	GCAGAAAGTCCAAGTA	TACTTGGACTTTCTGC	4.14431	GTAAAAAGTCCATATA	TATATGGACTTTTTAC	3.57273	GCGAAAAGTCCATTCA	TGAATGGACTTTTCGC	0.276733	NA	-0.0535766	-1.01461	NA	1.22667	0.881413
AAAGTCCC	GGGACTTT	3.98218	ACAAAAAGTCCCGTCG	CGACGGGACTTTTTGT	NA	CGCAAAAGTCCCCATA	TATGGGGACTTTTGCG	4.56197	AGTAAAAGTCCCCATC	GATGGGGACTTTTACT	1.6151	GCATAAAGTCCCACTT	AAGTGGGACTTTATGC	NA	GCAGAAAGTCCCAGTA	TACTGGGACTTTCTGC	NA	GTAAAAAGTCCCTATA	TATAGGGACTTTTTAC	NA	GCGAAAAGTCCCTTCA	TGAAGGGACTTTTCGC	0.254364	NA	-0.904341	-1.05547	NA	NA	NA
AAAGTCCG	CGGACTTT	3.43079	ACAAAAAGTCCGGTCG	CGACCGGACTTTTTGT	5.89739	CGCAAAAGTCCGCATA	TATGCGGACTTTTGCG	5.34585	AGTAAAAGTCCGCATC	GATGCGGACTTTTACT	1.90432	GCATAAAGTCCGACTT	AAGTCGGACTTTATGC	4.23766	GCAGAAAGTCCGAGTA	TACTCGGACTTTCTGC	3.6342	GTAAAAAGTCCGTATA	TATACGGACTTTTTAC	1.71285	GCGAAAAGTCCGTTCA	TGAACGGACTTTTCGC	-0.531373	1.35548	0.0185846	-0.763298	0.150146	0.752416	-1.0491
AAAGTCCT	AGGACTTT	NA	ACAAAAAGTCCTGTCG	CGACAGGACTTTTTGT	NA	CGCAAAAGTCCTCATA	TATGAGGACTTTTGCG	5.00286	AGTAAAAGTCCTCATC	GATGAGGACTTTTACT	NA	GCATAAAGTCCTACTT	AAGTAGGACTTTATGC	NA	GCAGAAAGTCCTAGTA	TACTAGGACTTTCTGC	NA	GTAAAAAGTCCTTATA	TATAAGGACTTTTTAC	NA	GCGAAAAGTCCTTTCA	TGAAAGGACTTTTCGC	NA	NA	-0.38524	NA	NA	NA	NA
AAAGTCGA	TCGACTTT	3.9772	ACAAAAAGTCGAGTCG	CGACTCGACTTTTTGT	4.58258	CGCAAAAGTCGACATA	TATGTCGACTTTTGCG	4.56942	AGTAAAAGTCGACATC	GATGTCGACTTTTACT	1.87741	GCATAAAGTCGAACTT	AAGTTCGACTTTATGC	2.89619	GCAGAAAGTCGAAGTA	TACTTCGACTTTCTGC	2.40702	GTAAAAAGTCGATATA	TATATCGACTTTTTAC	NA	GCGAAAAGTCGATTCA	TGAATCGACTTTTCGC	0.247259	-0.396305	-0.895576	-0.79048	-0.968125	-0.388504	NA
AAAGTCGC	GCGACTTT	4.76483	ACAAAAAGTCGCGTCG	CGACGCGACTTTTTGT	5.25245	CGCAAAAGTCGCCATA	TATGGCGACTTTTGCG	3.71772	AGTAAAAGTCGCCATC	GATGGCGACTTTTACT	1.45637	GCATAAAGTCGCACTT	AAGTGCGACTTTATGC	NA	GCAGAAAGTCGCAGTA	TACTGCGACTTTCTGC	4.29217	GTAAAAAGTCGCTATA	TATAGCGACTTTTTAC	1.76854	GCGAAAAGTCGCTTCA	TGAAGCGACTTTTCGC	1.36963	0.496199	-1.89835	-1.21583	NA	1.36414	-0.991295
AAAGTCGG	CCGACTTT	4.17716	ACAAAAAGTCGGGTCG	CGACCCGACTTTTTGT	5.18104	CGCAAAAGTCGGCATA	TATGCCGACTTTTGCG	4.81678	AGTAAAAGTCGGCATC	GATGCCGACTTTTACT	1.26233	GCATAAAGTCGGACTT	AAGTCCGACTTTATGC	3.01418	GCAGAAAGTCGGAGTA	TACTCCGACTTTCTGC	2.28014	GTAAAAAGTCGGTATA	TATACCGACTTTTTAC	1.96697	GCGAAAAGTCGGTTCA	TGAACCGACTTTTCGC	0.532201	0.401055	-0.604338	-1.41185	-0.869767	-0.506463	-0.785332
AAAGTCGT	ACGACTTT	4.10762	ACAAAAAGTCGTGTCG	CGACACGACTTTTTGT	5.00075	CGCAAAAGTCGTCATA	TATGACGACTTTTGCG	5.42624	AGTAAAAGTCGTCATC	GATGACGACTTTTACT	2.23871	GCATAAAGTCGTACTT	AAGTACGACTTTATGC	4.56886	GCAGAAAGTCGTAGTA	TACTACGACTTTCTGC	3.00222	GTAAAAAGTCGTTATA	TATAACGACTTTTTAC	2.73602	GCGAAAAGTCGTTTCA	TGAAACGACTTTTCGC	0.43311	0.160847	0.113239	-0.425489	0.426234	0.16486	0.0129316
AAAGTCTA	TAGACTTT	4.01321	ACAAAAAGTCTAGTCG	CGACTAGACTTTTTGT	4.90793	CGCAAAAGTCTACATA	TATGTAGACTTTTGCG	5.19028	AGTAAAAGTCTACATC	GATGTAGACTTTTACT	1.30465	GCATAAAGTCTAACTT	AAGTTAGACTTTATGC	3.63542	GCAGAAAGTCTAAGTA	TACTTAGACTTTCTGC	3.70874	GTAAAAAGTCTATATA	TATATAGACTTTTTAC	2.39503	GCGAAAAGTCTATTCA	TGAATAGACTTTTCGC	0.29858	0.0371834	-0.164579	-1.3691	-0.351894	0.821712	-0.341013
AAAGTCTC	GAGACTTT	4.49698	ACAAAAAGTCTCGTCG	CGACGAGACTTTTTGT	4.81045	CGCAAAAGTCTCCATA	TATGGAGACTTTTGCG	4.83819	AGTAAAAGTCTCCATC	GATGGAGACTTTTACT	2.97754	GCATAAAGTCTCACTT	AAGTGAGACTTTATGC	NA	GCAGAAAGTCTCAGTA	TACTGAGACTTTCTGC	3.87611	GTAAAAAGTCTCTATA	TATAGAGACTTTTTAC	NA	GCGAAAAGTCTCTTCA	TGAAGAGACTTTTCGC	0.987944	-0.0927043	-0.579124	0.320906	NA	0.977316	NA
AAAGTCTG	CAGACTTT	4.35096	ACAAAAAGTCTGGTCG	CGACCAGACTTTTTGT	4.58012	CGCAAAAGTCTGCATA	TATGCAGACTTTTGCG	5.54721	AGTAAAAGTCTGCATC	GATGCAGACTTTTACT	2.21781	GCATAAAGTCTGACTT	AAGTCAGACTTTATGC	5.34902	GCAGAAAGTCTGAGTA	TACTCAGACTTTCTGC	2.98666	GTAAAAAGTCTGTATA	TATACAGACTTTTTAC	2.99084	GCGAAAAGTCTGTTCA	TGAACAGACTTTTCGC	0.779869	-0.39958	0.255664	-0.446602	1.07659	0.150389	0.277432
AAAGTCTT	AAGACTTT	3.94687	ACAAAAAGTCTTGTCG	CGACAAGACTTTTTGT	5.37528	CGCAAAAGTCTTCATA	TATGAAGACTTTTGCG	4.96196	AGTAAAAGTCTTCATC	GATGAAGACTTTTACT	2.44606	GCATAAAGTCTTACTT	AAGTAAGACTTTATGC	4.53616	GCAGAAAGTCTTAGTA	TACTAAGACTTTCTGC	2.98547	GTAAAAAGTCTTTATA	TATAAAGACTTTTTAC	2.3975	GCGAAAAGTCTTTTCA	TGAAAAGACTTTTCGC	0.204042	0.659853	-0.433396	-0.216013	0.398976	0.149283	-0.338447
AAAGTGAA	TTCACTTT	4.01432	ACAAAAAGTGAAGTCG	CGACTTCACTTTTTGT	NA	CGCAAAAGTGAACATA	TATGTTCACTTTTGCG	4.47081	AGTAAAAGTGAACATC	GATGTTCACTTTTACT	2.26738	GCATAAAGTGAAACTT	AAGTTTCACTTTATGC	NA	GCAGAAAGTGAAAGTA	TACTTTCACTTTCTGC	4.21919	GTAAAAAGTGAATATA	TATATTCACTTTTTAC	2.3153	GCGAAAAGTGAATTCA	TGAATTCACTTTTCGC	0.300155	NA	-1.01167	-0.39652	NA	1.29628	-0.423769
AAAGTGAC	GTCACTTT	4.6321	ACAAAAAGTGACGTCG	CGACGTCACTTTTTGT	4.47783	CGCAAAAGTGACCATA	TATGGTCACTTTTGCG	4.48833	AGTAAAAGTGACCATC	GATGGTCACTTTTACT	2.63223	GCATAAAGTGACACTT	AAGTGTCACTTTATGC	NA	GCAGAAAGTGACAGTA	TACTGTCACTTTCTGC	NA	GTAAAAAGTGACTATA	TATAGTCACTTTTTAC	2.64076	GCGAAAAGTGACTTCA	TGAAGTCACTTTTCGC	1.18049	-0.535865	-0.991043	-0.0279399	NA	NA	-0.0859455
AAAGTGAG	CTCACTTT	4.12773	ACAAAAAGTGAGGTCG	CGACCTCACTTTTTGT	NA	CGCAAAAGTGAGCATA	TATGCTCACTTTTGCG	4.3369	AGTAAAAGTGAGCATC	GATGCTCACTTTTACT	2.09055	GCATAAAGTGAGACTT	AAGTCTCACTTTATGC	2.64047	GCAGAAAGTGAGAGTA	TACTCTCACTTTCTGC	NA	GTAAAAAGTGAGTATA	TATACTCACTTTTTAC	3.75453	GCGAAAAGTGAGTTCA	TGAACTCACTTTTCGC	0.461773	NA	-1.16934	-0.575162	-1.1813	NA	1.07012
AAAGTGAT	ATCACTTT	4.25707	ACAAAAAGTGATGTCG	CGACATCACTTTTTGT	NA	CGCAAAAGTGATCATA	TATGATCACTTTTGCG	4.72601	AGTAAAAGTGATCATC	GATGATCACTTTTACT	1.78437	GCATAAAGTGATACTT	AAGTATCACTTTATGC	5.40948	GCAGAAAGTGATAGTA	TACTATCACTTTCTGC	2.66148	GTAAAAAGTGATTATA	TATAATCACTTTTTAC	3.22906	GCGAAAAGTGATTTCA	TGAAATCACTTTTCGC	0.646075	NA	-0.7112	-0.884477	1.12699	-0.151933	0.524696
AAAGTGCA	TGCACTTT	2.04607	ACAAAAAGTGCAGTCG	CGACTGCACTTTTTGT	4.60062	CGCAAAAGTGCACATA	TATGTGCACTTTTGCG	3.62607	AGTAAAAGTGCACATC	GATGTGCACTTTTACT	NA	GCATAAAGTGCAACTT	AAGTTGCACTTTATGC	NA	GCAGAAAGTGCAAGTA	TACTTGCACTTTCTGC	2.15871	GTAAAAAGTGCATATA	TATATGCACTTTTTAC	NA	GCGAAAAGTGCATTCA	TGAATGCACTTTTCGC	-2.5046	-0.372268	-2.00626	NA	NA	-0.619358	NA
AAAGTGCC	GGCACTTT	4.21005	ACAAAAAGTGCCGTCG	CGACGGCACTTTTTGT	4.01765	CGCAAAAGTGCCCATA	TATGGGCACTTTTGCG	4.83891	AGTAAAAGTGCCCATC	GATGGGCACTTTTACT	1.36371	GCATAAAGTGCCACTT	AAGTGGCACTTTATGC	NA	GCAGAAAGTGCCAGTA	TACTGGCACTTTCTGC	3.20191	GTAAAAAGTGCCTATA	TATAGGCACTTTTTAC	2.43465	GCGAAAAGTGCCTTCA	TGAAGGCACTTTTCGC	0.579066	-1.14899	-0.578282	-1.30944	NA	0.350512	-0.299881
AAAGTGCG	CGCACTTT	3.80413	ACAAAAAGTGCGGTCG	CGACCGCACTTTTTGT	4.63374	CGCAAAAGTGCGCATA	TATGCGCACTTTTGCG	4.77396	AGTAAAAGTGCGCATC	GATGCGCACTTTTACT	2.21098	GCATAAAGTGCGACTT	AAGTCGCACTTTATGC	NA	GCAGAAAGTGCGAGTA	TACTCGCACTTTCTGC	2.43475	GTAAAAAGTGCGTATA	TATACGCACTTTTTAC	2.51198	GCGAAAAGTGCGTTCA	TGAACGCACTTTTCGC	0.000644339	-0.328137	-0.654749	-0.453495	NA	-0.362721	-0.219621
AAAGTGCT	AGCACTTT	4.86932	ACAAAAAGTGCTGTCG	CGACAGCACTTTTTGT	NA	CGCAAAAGTGCTCATA	TATGAGCACTTTTGCG	5.16753	AGTAAAAGTGCTCATC	GATGAGCACTTTTACT	1.03827	GCATAAAGTGCTACTT	AAGTAGCACTTTATGC	NA	GCAGAAAGTGCTAGTA	TACTAGCACTTTCTGC	4.28299	GTAAAAAGTGCTTATA	TATAAGCACTTTTTAC	1.13061	GCGAAAAGTGCTTTCA	TGAAAGCACTTTTCGC	1.51853	NA	-0.191365	-1.63821	NA	1.3556	-1.65345
AAAGTGGA	TCCACTTT	2.57695	ACAAAAAGTGGAGTCG	CGACTCCACTTTTTGT	3.96707	CGCAAAAGTGGACATA	TATGTCCACTTTTGCG	3.67451	AGTAAAAGTGGACATC	GATGTCCACTTTTACT	1.77551	GCATAAAGTGGAACTT	AAGTTCCACTTTATGC	4.43294	GCAGAAAGTGGAAGTA	TACTTCCACTTTCTGC	3.72962	GTAAAAAGTGGATATA	TATATCCACTTTTTAC	3.37516	GCGAAAAGTGGATTCA	TGAATCCACTTTTCGC	-1.74809	-1.21638	-1.94923	-0.893423	0.312933	0.841127	0.676345
AAAGTGGC	GCCACTTT	3.60568	ACAAAAAGTGGCGTCG	CGACGCCACTTTTTGT	4.67621	CGCAAAAGTGGCCATA	TATGGCCACTTTTGCG	4.52367	AGTAAAAGTGGCCATC	GATGGCCACTTTTACT	1.82798	GCATAAAGTGGCACTT	AAGTGCCACTTTATGC	3.57043	GCAGAAAGTGGCAGTA	TACTGCCACTTTCTGC	2.20139	GTAAAAAGTGGCTATA	TATAGCCACTTTTTAC	1.27061	GCGAAAAGTGGCTTCA	TGAAGCCACTTTTCGC	-0.282158	-0.271554	-0.949436	-0.840424	-0.406069	-0.579676	-1.50814
AAAGTGGG	CCCACTTT	3.83634	ACAAAAAGTGGGGTCG	CGACCCCACTTTTTGT	4.76994	CGCAAAAGTGGGCATA	TATGCCCACTTTTGCG	4.8338	AGTAAAAGTGGGCATC	GATGCCCACTTTTACT	3.25302	GCATAAAGTGGGACTT	AAGTCCCACTTTATGC	3.42627	GCAGAAAGTGGGAGTA	TACTCCCACTTTCTGC	0.621555	GTAAAAAGTGGGTATA	TATACCCACTTTTTAC	1.33985	GCGAAAAGTGGGTTCA	TGAACCCACTTTTCGC	0.0465428	-0.146675	-0.584295	0.599206	-0.526245	-2.04846	-1.43627
AAAGTGGT	ACCACTTT	4.00151	ACAAAAAGTGGTGTCG	CGACACCACTTTTTGT	4.93295	CGCAAAAGTGGTCATA	TATGACCACTTTTGCG	4.78189	AGTAAAAGTGGTCATC	GATGACCACTTTTACT	0.886909	GCATAAAGTGGTACTT	AAGTACCACTTTATGC	2.00977	GCAGAAAGTGGTAGTA	TACTACCACTTTCTGC	1.86182	GTAAAAAGTGGTTATA	TATAACCACTTTTTAC	1.71724	GCGAAAAGTGGTTTCA	TGAAACCACTTTTCGC	0.281903	0.0705186	-0.645411	-1.79112	-1.70705	-0.895383	-1.04454
AAAGTGTA	TACACTTT	3.71772	ACAAAAAGTGTAGTCG	CGACTACACTTTTTGT	NA	CGCAAAAGTGTACATA	TATGTACACTTTTGCG	4.88303	AGTAAAAGTGTACATC	GATGTACACTTTTACT	1.96287	GCATAAAGTGTAACTT	AAGTTACACTTTATGC	3.15365	GCAGAAAGTGTAAGTA	TACTTACACTTTCTGC	2.81326	GTAAAAAGTGTATATA	TATATACACTTTTTAC	2.60756	GCGAAAAGTGTATTCA	TGAATACACTTTTCGC	-0.122492	NA	-0.526328	-0.704149	-0.753507	-0.0108231	-0.120411
AAAGTGTC	GACACTTT	3.77785	ACAAAAAGTGTCGTCG	CGACGACACTTTTTGT	4.16862	CGCAAAAGTGTCCATA	TATGGACACTTTTGCG	4.36077	AGTAAAAGTGTCCATC	GATGGACACTTTTACT	1.96627	GCATAAAGTGTCACTT	AAGTGACACTTTATGC	3.88036	GCAGAAAGTGTCAGTA	TACTGACACTTTCTGC	2.81328	GTAAAAAGTGTCTATA	TATAGACACTTTTTAC	1.97242	GCGAAAAGTGTCTTCA	TGAAGACACTTTTCGC	-0.0368139	-0.947846	-1.14123	-0.70071	-0.14771	-0.0108008	-0.77967
AAAGTGTG	CACACTTT	3.88374	ACAAAAAGTGTGGTCG	CGACCACACTTTTTGT	4.54483	CGCAAAAGTGTGCATA	TATGCACACTTTTGCG	4.96939	AGTAAAAGTGTGCATC	GATGCACACTTTTACT	2.68897	GCATAAAGTGTGACTT	AAGTCACACTTTATGC	3.69645	GCAGAAAGTGTGAGTA	TACTCACACTTTCTGC	2.89019	GTAAAAAGTGTGTATA	TATACACACTTTTTAC	1.89952	GCGAAAAGTGTGTTCA	TGAACACACTTTTCGC	0.114086	-0.446601	-0.42465	0.029381	-0.30102	0.0607026	-0.855343
AAAGTGTT	AACACTTT	4.0819	ACAAAAAGTGTTGTCG	CGACAACACTTTTTGT	4.57577	CGCAAAAGTGTTCATA	TATGAACACTTTTGCG	5.18976	AGTAAAAGTGTTCATC	GATGAACACTTTTACT	1.71017	GCATAAAGTGTTACTT	AAGTAACACTTTATGC	3.11507	GCAGAAAGTGTTAGTA	TACTAACACTTTCTGC	3.28214	GTAAAAAGTGTTTATA	TATAAACACTTTTTAC	2.258	GCGAAAAGTGTTTTCA	TGAAAACACTTTTCGC	0.396459	-0.405368	-0.165192	-0.959439	-0.785665	0.425099	-0.483242
AAAGTTAA	TTAACTTT	3.20259	ACAAAAAGTTAAGTCG	CGACTTAACTTTTTGT	NA	CGCAAAAGTTAACATA	TATGTTAACTTTTGCG	3.81357	AGTAAAAGTTAACATC	GATGTTAACTTTTACT	1.97875	GCATAAAGTTAAACTT	AAGTTTAACTTTATGC	2.90068	GCAGAAAGTTAAAGTA	TACTTTAACTTTCTGC	NA	GTAAAAAGTTAATATA	TATATTAACTTTTTAC	0.505	GCGAAAAGTTAATTCA	TGAATTAACTTTTCGC	-0.856548	NA	-1.7855	-0.688103	-0.964379	NA	-2.30282
AAAGTTAC	GTAACTTT	3.7278	ACAAAAAGTTACGTCG	CGACGTAACTTTTTGT	3.22892	CGCAAAAGTTACCATA	TATGGTAACTTTTGCG	3.86758	AGTAAAAGTTACCATC	GATGGTAACTTTTACT	NA	GCATAAAGTTACACTT	AAGTGTAACTTTATGC	NA	GCAGAAAGTTACAGTA	TACTGTAACTTTCTGC	2.60987	GTAAAAAGTTACTATA	TATAGTAACTTTTTAC	NA	GCGAAAAGTTACTTCA	TGAAGTAACTTTTCGC	-0.108128	-2.19986	-1.7219	NA	NA	-0.199913	NA
AAAGTTAG	CTAACTTT	3.89782	ACAAAAAGTTAGGTCG	CGACCTAACTTTTTGT	4.40607	CGCAAAAGTTAGCATA	TATGCTAACTTTTGCG	4.77961	AGTAAAAGTTAGCATC	GATGCTAACTTTTACT	NA	GCATAAAGTTAGACTT	AAGTCTAACTTTATGC	2.9766	GCAGAAAGTTAGAGTA	TACTCTAACTTTCTGC	NA	GTAAAAAGTTAGTATA	TATACTAACTTTTTAC	2.24232	GCGAAAAGTTAGTTCA	TGAACTAACTTTTCGC	0.134139	-0.631478	-0.648093	NA	-0.901093	NA	-0.499517
AAAGTTAT	ATAACTTT	3.85198	ACAAAAAGTTATGTCG	CGACATAACTTTTTGT	5.67418	CGCAAAAGTTATCATA	TATGATAACTTTTGCG	4.32336	AGTAAAAGTTATCATC	GATGATAACTTTTACT	1.93314	GCATAAAGTTATACTT	AAGTATAACTTTATGC	3.78704	GCAGAAAGTTATAGTA	TACTATAACTTTCTGC	2.39818	GTAAAAAGTTATTATA	TATAATAACTTTTTAC	0.448859	GCGAAAAGTTATTTCA	TGAAATAACTTTTCGC	0.068821	1.0581	-1.18528	-0.73418	-0.225496	-0.396719	-2.36109
AAAGTTCA	TGAACTTT	4.373	ACAAAAAGTTCAGTCG	CGACTGAACTTTTTGT	NA	CGCAAAAGTTCACATA	TATGTGAACTTTTGCG	5.18945	AGTAAAAGTTCACATC	GATGTGAACTTTTACT	1.9097	GCATAAAGTTCAACTT	AAGTTGAACTTTATGC	NA	GCAGAAAGTTCAAGTA	TACTTGAACTTTCTGC	3.02439	GTAAAAAGTTCATATA	TATATGAACTTTTTAC	2.29645	GCGAAAAGTTCATTCA	TGAATGAACTTTTCGC	0.811282	NA	-0.165554	-0.757863	NA	0.18547	-0.443337
AAAGTTCC	GGAACTTT	3.59384	ACAAAAAGTTCCGTCG	CGACGGAACTTTTTGT	NA	CGCAAAAGTTCCCATA	TATGGGAACTTTTGCG	4.76157	AGTAAAAGTTCCCATC	GATGGGAACTTTTACT	2.38415	GCATAAAGTTCCACTT	AAGTGGAACTTTATGC	NA	GCAGAAAGTTCCAGTA	TACTGGAACTTTCTGC	NA	GTAAAAAGTTCCTATA	TATAGGAACTTTTTAC	1.56938	GCGAAAAGTTCCTTCA	TGAAGGAACTTTTCGC	-0.299027	NA	-0.669341	-0.278555	NA	NA	-1.19802
AAAGTTCG	CGAACTTT	4.44486	ACAAAAAGTTCGGTCG	CGACCGAACTTTTTGT	4.81356	CGCAAAAGTTCGCATA	TATGCGAACTTTTGCG	5.19353	AGTAAAAGTTCGCATC	GATGCGAACTTTTACT	2.39044	GCATAAAGTTCGACTT	AAGTCGAACTTTATGC	3.29283	GCAGAAAGTTCGAGTA	TACTCGAACTTTCTGC	3.34869	GTAAAAAGTTCGTATA	TATACGAACTTTTTAC	2.15824	GCGAAAAGTTCGTTCA	TGAACGAACTTTTCGC	0.913681	-0.0885481	-0.160749	-0.272202	-0.63748	0.48697	-0.586795
AAAGTTCT	AGAACTTT	3.91849	ACAAAAAGTTCTGTCG	CGACAGAACTTTTTGT	NA	CGCAAAAGTTCTCATA	TATGAGAACTTTTGCG	4.44993	AGTAAAAGTTCTCATC	GATGAGAACTTTTACT	NA	GCATAAAGTTCTACTT	AAGTAGAACTTTATGC	5.03841	GCAGAAAGTTCTAGTA	TACTAGAACTTTCTGC	2.82021	GTAAAAAGTTCTTATA	TATAAGAACTTTTTAC	2.5304	GCGAAAAGTTCTTTCA	TGAAAGAACTTTTCGC	0.163599	NA	-1.03626	NA	0.817663	-0.00436236	-0.200496
AAAGTTGA	TCAACTTT	4.55215	ACAAAAAGTTGAGTCG	CGACTCAACTTTTTGT	4.25612	CGCAAAAGTTGACATA	TATGTCAACTTTTGCG	5.11186	AGTAAAAGTTGACATC	GATGTCAACTTTTACT	2.06184	GCATAAAGTTGAACTT	AAGTTCAACTTTATGC	2.71596	GCAGAAAGTTGAAGTA	TACTTCAACTTTCTGC	3.54892	GTAAAAAGTTGATATA	TATATCAACTTTTTAC	1.02754	GCGAAAAGTTGATTCA	TGAATCAACTTTTCGC	1.06656	-0.831257	-0.256911	-0.604161	-1.11836	0.67313	-1.76043
AAAGTTGC	GCAACTTT	4.24704	ACAAAAAGTTGCGTCG	CGACGCAACTTTTTGT	NA	CGCAAAAGTTGCCATA	TATGGCAACTTTTGCG	4.38668	AGTAAAAGTTGCCATC	GATGGCAACTTTTACT	0.531772	GCATAAAGTTGCACTT	AAGTGCAACTTTATGC	NA	GCAGAAAGTTGCAGTA	TACTGCAACTTTCTGC	3.45428	GTAAAAAGTTGCTATA	TATAGCAACTTTTTAC	2.63012	GCGAAAAGTTGCTTCA	TGAAGCAACTTTTCGC	0.63178	NA	-1.11073	-2.14989	NA	0.585144	-0.0969893
AAAGTTGG	CCAACTTT	3.52485	ACAAAAAGTTGGGTCG	CGACCCAACTTTTTGT	5.05842	CGCAAAAGTTGGCATA	TATGCCAACTTTTGCG	4.704	AGTAAAAGTTGGCATC	GATGCCAACTTTTACT	1.26348	GCATAAAGTTGGACTT	AAGTCCAACTTTATGC	NA	GCAGAAAGTTGGAGTA	TACTCCAACTTTCTGC	1.36531	GTAAAAAGTTGGTATA	TATACCAACTTTTTAC	1.8603	GCGAAAAGTTGGTTCA	TGAACCAACTTTTCGC	-0.397335	0.237682	-0.737116	-1.41069	NA	-1.35699	-0.896047
AAAGTTGT	ACAACTTT	3.46511	ACAAAAAGTTGTGTCG	CGACACAACTTTTTGT	5.128	CGCAAAAGTTGTCATA	TATGACAACTTTTGCG	4.9677	AGTAAAAGTTGTCATC	GATGACAACTTTTACT	1.06912	GCATAAAGTTGTACTT	AAGTACAACTTTATGC	4.45615	GCAGAAAGTTGTAGTA	TACTACAACTTTCTGC	2.26212	GTAAAAAGTTGTTATA	TATAACAACTTTTTAC	2.36252	GCGAAAAGTTGTTTCA	TGAAACAACTTTTCGC	-0.482462	0.330396	-0.426639	-1.60704	0.332276	-0.523222	-0.37475
AAAGTTTA	TAAACTTT	4.11386	ACAAAAAGTTTAGTCG	CGACTAAACTTTTTGT	NA	CGCAAAAGTTTACATA	TATGTAAACTTTTGCG	5.13551	AGTAAAAGTTTACATC	GATGTAAACTTTTACT	0.903834	GCATAAAGTTTAACTT	AAGTTAAACTTTATGC	3.46832	GCAGAAAGTTTAAGTA	TACTTAAACTTTCTGC	3.09319	GTAAAAAGTTTATATA	TATATAAACTTTTTAC	1.6541	GCGAAAAGTTTATTCA	TGAATAAACTTTTCGC	0.442009	NA	-0.229065	-1.77402	-0.491188	0.249437	-1.11008
AAAGTTTC	GAAACTTT	3.96802	ACAAAAAGTTTCGTCG	CGACGAAACTTTTTGT	5.20854	CGCAAAAGTTTCCATA	TATGGAAACTTTTGCG	4.92565	AGTAAAAGTTTCCATC	GATGGAAACTTTTACT	1.22101	GCATAAAGTTTCACTT	AAGTGAAACTTTATGC	3.78664	GCAGAAAGTTTCAGTA	TACTGAAACTTTCTGC	2.94304	GTAAAAAGTTTCTATA	TATAGAAACTTTTTAC	2.52415	GCGAAAAGTTTCTTCA	TGAAGAAACTTTTCGC	0.234179	0.437692	-0.476149	-1.45361	-0.225835	0.109834	-0.206987
AAAGTTTG	CAAACTTT	3.51101	ACAAAAAGTTTGGTCG	CGACCAAACTTTTTGT	4.56853	CGCAAAAGTTTGCATA	TATGCAAACTTTTGCG	4.78691	AGTAAAAGTTTGCATC	GATGCAAACTTTTACT	2.20717	GCATAAAGTTTGACTT	AAGTCAAACTTTATGC	3.65111	GCAGAAAGTTTGAGTA	TACTCAAACTTTCTGC	2.98728	GTAAAAAGTTTGTATA	TATACAAACTTTTTAC	2.72663	GCGAAAAGTTTGTTCA	TGAACAAACTTTTCGC	-0.417053	-0.415025	-0.639498	-0.457344	-0.338813	0.150971	0.0031882
AAAGTTTT	AAAACTTT	4.30168	ACAAAAAGTTTTGTCG	CGACAAAACTTTTTGT	4.61258	CGCAAAAGTTTTCATA	TATGAAAACTTTTGCG	4.64759	AGTAAAAGTTTTCATC	GATGAAAACTTTTACT	0.965374	GCATAAAGTTTTACTT	AAGTAAAACTTTATGC	3.48937	GCAGAAAGTTTTAGTA	TACTAAAACTTTCTGC	3.47589	GTAAAAAGTTTTTATA	TATAAAAACTTTTTAC	2.72994	GCGAAAAGTTTTTTCA	TGAAAAAACTTTTCGC	0.709641	-0.35633	-0.803539	-1.71185	-0.473643	0.60523	0.00661844
AAATAAAA	TTTTATTT	3.95044	ACAAAAATAAAAGTCG	CGACTTTTATTTTTGT	NA	CGCAAAATAAAACATA	TATGTTTTATTTTGCG	4.80689	AGTAAAATAAAACATC	GATGTTTTATTTTACT	3.02768	GCATAAATAAAAACTT	AAGTTTTTATTTATGC	4.49686	GCAGAAATAAAAAGTA	TACTTTTTATTTCTGC	NA	GTAAAAATAAAATATA	TATATTTTATTTTTAC	NA	GCGAAAATAAAATTCA	TGAATTTTATTTTCGC	0.209122	NA	-0.61598	0.371557	0.36622	NA	NA
AAATAAAC	GTTTATTT	3.95852	ACAAAAATAAACGTCG	CGACGTTTATTTTTGT	NA	CGCAAAATAAACCATA	TATGGTTTATTTTGCG	6.00647	AGTAAAATAAACCATC	GATGGTTTATTTTACT	2.40016	GCATAAATAAACACTT	AAGTGTTTATTTATGC	3.06817	GCAGAAATAAACAGTA	TACTGTTTATTTCTGC	NA	GTAAAAATAAACTATA	TATAGTTTATTTTTAC	NA	GCGAAAATAAACTTCA	TGAAGTTTATTTTCGC	0.22065	NA	0.796386	-0.262383	-0.824761	NA	NA
AAATAAAG	CTTTATTT	4.24149	ACAAAAATAAAGGTCG	CGACCTTTATTTTTGT	NA	CGCAAAATAAAGCATA	TATGCTTTATTTTGCG	5.53173	AGTAAAATAAAGCATC	GATGCTTTATTTTACT	2.11818	GCATAAATAAAGACTT	AAGTCTTTATTTATGC	3.29269	GCAGAAATAAAGAGTA	TACTCTTTATTTCTGC	2.62805	GTAAAAATAAAGTATA	TATACTTTATTTTTAC	NA	GCGAAAATAAAGTTCA	TGAACTTTATTTTCGC	0.623873	NA	0.237436	-0.547252	-0.637596	-0.183015	NA
AAATAAAT	ATTTATTT	3.81501	ACAAAAATAAATGTCG	CGACATTTATTTTTGT	NA	CGCAAAATAAATCATA	TATGATTTATTTTGCG	5.71383	AGTAAAATAAATCATC	GATGATTTATTTTACT	3.3318	GCATAAATAAATACTT	AAGTATTTATTTATGC	3.2343	GCAGAAATAAATAGTA	TACTATTTATTTCTGC	NA	GTAAAAATAAATTATA	TATAATTTATTTTTAC	NA	GCGAAAATAAATTTCA	TGAAATTTATTTTCGC	0.016142	NA	0.451842	0.678787	-0.686273	NA	NA
AAATAACA	TGTTATTT	3.50652	ACAAAAATAACAGTCG	CGACTGTTATTTTTGT	NA	CGCAAAATAACACATA	TATGTGTTATTTTGCG	5.08286	AGTAAAATAACACATC	GATGTGTTATTTTACT	3.21568	GCATAAATAACAACTT	AAGTTGTTATTTATGC	4.09277	GCAGAAATAACAAGTA	TACTTGTTATTTCTGC	NA	GTAAAAATAACATATA	TATATGTTATTTTTAC	NA	GCGAAAATAACATTCA	TGAATGTTATTTTCGC	-0.423453	NA	-0.291054	0.561481	0.0293586	NA	NA
AAATAACC	GGTTATTT	4.80285	ACAAAAATAACCGTCG	CGACGGTTATTTTTGT	NA	CGCAAAATAACCCATA	TATGGGTTATTTTGCG	5.682	AGTAAAATAACCCATC	GATGGGTTATTTTACT	NA	GCATAAATAACCACTT	AAGTGGTTATTTATGC	2.69904	GCAGAAATAACCAGTA	TACTGGTTATTTCTGC	NA	GTAAAAATAACCTATA	TATAGGTTATTTTTAC	NA	GCGAAAATAACCTTCA	TGAAGGTTATTTTCGC	1.42382	NA	0.414365	NA	-1.13247	NA	NA
AAATAACG	CGTTATTT	3.24442	ACAAAAATAACGGTCG	CGACCGTTATTTTTGT	NA	CGCAAAATAACGCATA	TATGCGTTATTTTGCG	5.50235	AGTAAAATAACGCATC	GATGCGTTATTTTACT	2.49274	GCATAAATAACGACTT	AAGTCGTTATTTATGC	3.34735	GCAGAAATAACGAGTA	TACTCGTTATTTCTGC	3.53005	GTAAAAATAACGTATA	TATACGTTATTTTTAC	NA	GCGAAAATAACGTTCA	TGAACGTTATTTTCGC	-0.796952	NA	0.202848	-0.168851	-0.592029	0.655588	NA
AAATAACT	AGTTATTT	2.31616	ACAAAAATAACTGTCG	CGACAGTTATTTTTGT	NA	CGCAAAATAACTCATA	TATGAGTTATTTTGCG	5.67036	AGTAAAATAACTCATC	GATGAGTTATTTTACT	1.66845	GCATAAATAACTACTT	AAGTAGTTATTTATGC	NA	GCAGAAATAACTAGTA	TACTAGTTATTTCTGC	NA	GTAAAAATAACTTATA	TATAAGTTATTTTTAC	NA	GCGAAAATAACTTTCA	TGAAAGTTATTTTCGC	-2.11971	NA	0.400659	-1.00158	NA	NA	NA
AAATAAGA	TCTTATTT	3.5273	ACAAAAATAAGAGTCG	CGACTCTTATTTTTGT	NA	CGCAAAATAAGACATA	TATGTCTTATTTTGCG	5.3394	AGTAAAATAAGACATC	GATGTCTTATTTTACT	2.86716	GCATAAATAAGAACTT	AAGTTCTTATTTATGC	3.49428	GCAGAAATAAGAAGTA	TACTTCTTATTTCTGC	4.05121	GTAAAAATAAGATATA	TATATCTTATTTTTAC	NA	GCGAAAATAAGATTCA	TGAATCTTATTTTCGC	-0.393844	NA	0.0109923	0.209396	-0.469546	1.14011	NA
AAATAAGC	GCTTATTT	3.98747	ACAAAAATAAGCGTCG	CGACGCTTATTTTTGT	5.30027	CGCAAAATAAGCCATA	TATGGCTTATTTTGCG	5.28161	AGTAAAATAAGCCATC	GATGGCTTATTTTACT	2.37297	GCATAAATAAGCACTT	AAGTGCTTATTTATGC	NA	GCAGAAATAAGCAGTA	TACTGCTTATTTCTGC	NA	GTAAAAATAAGCTATA	TATAGCTTATTTTTAC	2.77914	GCGAAAATAAGCTTCA	TGAAGCTTATTTTCGC	0.261901	0.559917	-0.0570483	-0.28985	NA	NA	0.0576872
AAATAAGG	CCTTATTT	3.59793	ACAAAAATAAGGGTCG	CGACCCTTATTTTTGT	5.55985	CGCAAAATAAGGCATA	TATGCCTTATTTTGCG	5.11591	AGTAAAATAAGGCATC	GATGCCTTATTTTACT	NA	GCATAAATAAGGACTT	AAGTCCTTATTTATGC	2.38787	GCAGAAATAAGGAGTA	TACTCCTTATTTCTGC	1.13559	GTAAAAATAAGGTATA	TATACCTTATTTTTAC	1.15393	GCGAAAATAAGGTTCA	TGAACCTTATTTTCGC	-0.293193	0.905769	-0.252145	NA	-1.39187	-1.57056	-1.62924
AAATAAGT	ACTTATTT	3.98734	ACAAAAATAAGTGTCG	CGACACTTATTTTTGT	4.36329	CGCAAAATAAGTCATA	TATGACTTATTTTGCG	5.41409	AGTAAAATAAGTCATC	GATGACTTATTTTACT	2.70357	GCATAAATAAGTACTT	AAGTACTTATTTATGC	3.07989	GCAGAAATAAGTAGTA	TACTACTTATTTCTGC	1.65886	GTAAAAATAAGTTATA	TATAACTTATTTTTAC	2.66378	GCGAAAATAAGTTTCA	TGAAACTTATTTTCGC	0.26171	-0.688466	0.0989331	0.0441368	-0.814991	-1.08408	-0.0620562
AAATAATA	TATTATTT	3.6703	ACAAAAATAATAGTCG	CGACTATTATTTTTGT	NA	CGCAAAATAATACATA	TATGTATTATTTTGCG	6.04734	AGTAAAATAATACATC	GATGTATTATTTTACT	3.07001	GCATAAATAATAACTT	AAGTTATTATTTATGC	2.88877	GCAGAAATAATAAGTA	TACTTATTATTTCTGC	NA	GTAAAAATAATATATA	TATATATTATTTTTAC	3.30729	GCGAAAATAATATTCA	TGAATATTATTTTCGC	-0.190069	NA	0.844507	0.414323	-0.97431	NA	0.605896
AAATAATC	GATTATTT	4.50311	ACAAAAATAATCGTCG	CGACGATTATTTTTGT	NA	CGCAAAATAATCCATA	TATGGATTATTTTGCG	5.69597	AGTAAAATAATCCATC	GATGGATTATTTTACT	2.98628	GCATAAATAATCACTT	AAGTGATTATTTATGC	6.45657	GCAGAAATAATCAGTA	TACTGATTATTTCTGC	2.90052	GTAAAAATAATCTATA	TATAGATTATTTTTAC	NA	GCGAAAATAATCTTCA	TGAAGATTATTTTCGC	0.996679	NA	0.430807	0.329733	1.99986	0.0703042	NA
AAATAATG	CATTATTT	3.37474	ACAAAAATAATGGTCG	CGACCATTATTTTTGT	4.42417	CGCAAAATAATGCATA	TATGCATTATTTTGCG	6.02164	AGTAAAATAATGCATC	GATGCATTATTTTACT	2.63579	GCATAAATAATGACTT	AAGTCATTATTTATGC	3.33807	GCAGAAATAATGAGTA	TACTCATTATTTCTGC	2.11538	GTAAAAATAATGTATA	TATACATTATTTTTAC	1.71209	GCGAAAATAATGTTCA	TGAACATTATTTTCGC	-0.611244	-0.607364	0.814255	-0.0243371	-0.599771	-0.659646	-1.04988
AAATAATT	AATTATTT	4.69749	ACAAAAATAATTGTCG	CGACAATTATTTTTGT	NA	CGCAAAATAATTCATA	TATGAATTATTTTGCG	5.84148	AGTAAAATAATTCATC	GATGAATTATTTTACT	1.05702	GCATAAATAATTACTT	AAGTAATTATTTATGC	1.41485	GCAGAAATAATTAGTA	TACTAATTATTTCTGC	2.66884	GTAAAAATAATTTATA	TATAAATTATTTTTAC	NA	GCGAAAATAATTTTCA	TGAAAATTATTTTCGC	1.27368	NA	0.602138	-1.61927	-2.20299	-0.145091	NA
AAATACAA	TTGTATTT	3.95018	ACAAAAATACAAGTCG	CGACTTGTATTTTTGT	NA	CGCAAAATACAACATA	TATGTTGTATTTTGCG	5.61223	AGTAAAATACAACATC	GATGTTGTATTTTACT	3.42995	GCATAAATACAAACTT	AAGTTTGTATTTATGC	NA	GCAGAAATACAAAGTA	TACTTTGTATTTCTGC	NA	GTAAAAATACAATATA	TATATTGTATTTTTAC	NA	GCGAAAATACAATTCA	TGAATTGTATTTTCGC	0.208754	NA	0.332222	0.777944	NA	NA	NA
AAATACAC	GTGTATTT	4.49441	ACAAAAATACACGTCG	CGACGTGTATTTTTGT	NA	CGCAAAATACACCATA	TATGGTGTATTTTGCG	4.85715	AGTAAAATACACCATC	GATGGTGTATTTTACT	2.71759	GCATAAATACACACTT	AAGTGTGTATTTATGC	NA	GCAGAAATACACAGTA	TACTGTGTATTTCTGC	NA	GTAAAAATACACTATA	TATAGTGTATTTTTAC	NA	GCGAAAATACACTTCA	TGAAGTGTATTTTCGC	0.984292	NA	-0.556807	0.0582913	NA	NA	NA
AAATACAG	CTGTATTT	NA	ACAAAAATACAGGTCG	CGACCTGTATTTTTGT	NA	CGCAAAATACAGCATA	TATGCTGTATTTTGCG	5.69047	AGTAAAATACAGCATC	GATGCTGTATTTTACT	2.55601	GCATAAATACAGACTT	AAGTCTGTATTTATGC	NA	GCAGAAATACAGAGTA	TACTCTGTATTTCTGC	3.4774	GTAAAAATACAGTATA	TATACTGTATTTTTAC	2.45006	GCGAAAATACAGTTCA	TGAACTGTATTTTCGC	NA	NA	0.424334	-0.104936	NA	0.606637	-0.283895
AAATACAT	ATGTATTT	4.20382	ACAAAAATACATGTCG	CGACATGTATTTTTGT	NA	CGCAAAATACATCATA	TATGATGTATTTTGCG	5.82224	AGTAAAATACATCATC	GATGATGTATTTTACT	NA	GCATAAATACATACTT	AAGTATGTATTTATGC	NA	GCAGAAATACATAGTA	TACTATGTATTTCTGC	NA	GTAAAAATACATTATA	TATAATGTATTTTTAC	NA	GCGAAAATACATTTCA	TGAAATGTATTTTCGC	0.570192	NA	0.57948	NA	NA	NA	NA
AAATACCA	TGGTATTT	3.5904	ACAAAAATACCAGTCG	CGACTGGTATTTTTGT	4.92586	CGCAAAATACCACATA	TATGTGGTATTTTGCG	NA	AGTAAAATACCACATC	GATGTGGTATTTTACT	NA	GCATAAATACCAACTT	AAGTTGGTATTTATGC	4.02344	GCAGAAATACCAAGTA	TACTTGGTATTTCTGC	NA	GTAAAAATACCATATA	TATATGGTATTTTTAC	NA	GCGAAAATACCATTCA	TGAATGGTATTTTCGC	-0.303927	0.0610667	NA	NA	-0.0284327	NA	NA
AAATACCC	GGGTATTT	4.25663	ACAAAAATACCCGTCG	CGACGGGTATTTTTGT	NA	CGCAAAATACCCCATA	TATGGGGTATTTTGCG	5.30876	AGTAAAATACCCCATC	GATGGGGTATTTTACT	NA	GCATAAATACCCACTT	AAGTGGGTATTTATGC	3.2542	GCAGAAATACCCAGTA	TACTGGGTATTTCTGC	NA	GTAAAAATACCCTATA	TATAGGGTATTTTTAC	NA	GCGAAAATACCCTTCA	TGAAGGGTATTTTCGC	0.645451	NA	-0.0250812	NA	-0.669681	NA	NA
AAATACCG	CGGTATTT	3.71056	ACAAAAATACCGGTCG	CGACCGGTATTTTTGT	NA	CGCAAAATACCGCATA	TATGCGGTATTTTGCG	6.07475	AGTAAAATACCGCATC	GATGCGGTATTTTACT	3.07223	GCATAAATACCGACTT	AAGTCGGTATTTATGC	4.47168	GCAGAAATACCGAGTA	TACTCGGTATTTCTGC	3.97715	GTAAAAATACCGTATA	TATACGGTATTTTTAC	NA	GCGAAAATACCGTTCA	TGAACGGTATTTTCGC	-0.132698	NA	0.876787	0.416565	0.345222	1.07126	NA
AAATACCT	AGGTATTT	NA	ACAAAAATACCTGTCG	CGACAGGTATTTTTGT	NA	CGCAAAATACCTCATA	TATGAGGTATTTTGCG	4.10439	AGTAAAATACCTCATC	GATGAGGTATTTTACT	1.41641	GCATAAATACCTACTT	AAGTAGGTATTTATGC	2.21434	GCAGAAATACCTAGTA	TACTAGGTATTTCTGC	2.90863	GTAAAAATACCTTATA	TATAAGGTATTTTTAC	NA	GCGAAAATACCTTTCA	TGAAAGGTATTTTCGC	NA	NA	-1.44309	-1.25621	-1.53653	0.0778487	NA
AAATACGA	TCGTATTT	3.71327	ACAAAAATACGAGTCG	CGACTCGTATTTTTGT	NA	CGCAAAATACGACATA	TATGTCGTATTTTGCG	5.69889	AGTAAAATACGACATC	GATGTCGTATTTTACT	2.91281	GCATAAATACGAACTT	AAGTTCGTATTTATGC	NA	GCAGAAATACGAAGTA	TACTTCGTATTTCTGC	3.17127	GTAAAAATACGATATA	TATATCGTATTTTTAC	1.78748	GCGAAAATACGATTCA	TGAATCGTATTTTCGC	-0.128841	NA	0.434245	0.25551	NA	0.322021	-0.971634
AAATACGC	GCGTATTT	4.45809	ACAAAAATACGCGTCG	CGACGCGTATTTTTGT	4.68359	CGCAAAATACGCCATA	TATGGCGTATTTTGCG	4.74898	AGTAAAATACGCCATC	GATGGCGTATTTTACT	2.78114	GCATAAATACGCACTT	AAGTGCGTATTTATGC	NA	GCAGAAATACGCAGTA	TACTGCGTATTTCTGC	3.57682	GTAAAAATACGCTATA	TATAGCGTATTTTTAC	NA	GCGAAAATACGCTTCA	TGAAGCGTATTTTCGC	0.932525	-0.261722	-0.684162	0.122491	NA	0.699072	NA
AAATACGG	CCGTATTT	4.38456	ACAAAAATACGGGTCG	CGACCCGTATTTTTGT	4.73261	CGCAAAATACGGCATA	TATGCCGTATTTTGCG	5.33463	AGTAAAATACGGCATC	GATGCCGTATTTTACT	1.82194	GCATAAATACGGACTT	AAGTCCGTATTTATGC	2.68293	GCAGAAATACGGAGTA	TACTCCGTATTTCTGC	3.24331	GTAAAAATACGGTATA	TATACCGTATTTTTAC	NA	GCGAAAATACGGTTCA	TGAACCGTATTTTCGC	0.827742	-0.196414	0.00537826	-0.84652	-1.14591	0.388998	NA
AAATACGT	ACGTATTT	3.98437	ACAAAAATACGTGTCG	CGACACGTATTTTTGT	5.17749	CGCAAAATACGTCATA	TATGACGTATTTTGCG	5.28999	AGTAAAATACGTCATC	GATGACGTATTTTACT	2.78801	GCATAAATACGTACTT	AAGTACGTATTTATGC	4.64544	GCAGAAATACGTAGTA	TACTACGTATTTCTGC	3.22832	GTAAAAATACGTTATA	TATAACGTATTTTTAC	2.60654	GCGAAAATACGTTTCA	TGAAACGTATTTTCGC	0.257477	0.396327	-0.0471834	0.12944	0.490077	0.375064	-0.121462
AAATACTA	TAGTATTT	3.47814	ACAAAAATACTAGTCG	CGACTAGTATTTTTGT	NA	CGCAAAATACTACATA	TATGTAGTATTTTGCG	5.51403	AGTAAAATACTACATC	GATGTAGTATTTTACT	2.71902	GCATAAATACTAACTT	AAGTTAGTATTTATGC	4.01834	GCAGAAATACTAAGTA	TACTTAGTATTTCTGC	NA	GTAAAAATACTATATA	TATATAGTATTTTTAC	NA	GCGAAAATACTATTCA	TGAATAGTATTTTCGC	-0.4639	NA	0.216601	0.0597381	-0.0326827	NA	NA
AAATACTC	GAGTATTT	4.43302	ACAAAAATACTCGTCG	CGACGAGTATTTTTGT	NA	CGCAAAATACTCCATA	TATGGAGTATTTTGCG	1.80936	AGTAAAATACTCCATC	GATGGAGTATTTTACT	3.11506	GCATAAATACTCACTT	AAGTGAGTATTTATGC	4.93926	GCAGAAATACTCAGTA	TACTGAGTATTTCTGC	NA	GTAAAAATACTCTATA	TATAGAGTATTTTTAC	NA	GCGAAAATACTCTTCA	TGAAGAGTATTTTCGC	0.896805	NA	-4.14523	0.459837	0.735009	NA	NA
AAATACTG	CAGTATTT	3.9538	ACAAAAATACTGGTCG	CGACCAGTATTTTTGT	NA	CGCAAAATACTGCATA	TATGCAGTATTTTGCG	5.28112	AGTAAAATACTGCATC	GATGCAGTATTTTACT	2.12541	GCATAAATACTGACTT	AAGTCAGTATTTATGC	4.81897	GCAGAAATACTGAGTA	TACTCAGTATTTCTGC	3.8693	GTAAAAATACTGTATA	TATACAGTATTTTTAC	2.05845	GCGAAAATACTGTTCA	TGAACAGTATTTTCGC	0.213916	NA	-0.0576284	-0.539949	0.634734	0.970989	-0.690369
AAATACTT	AAGTATTT	4.24238	ACAAAAATACTTGTCG	CGACAAGTATTTTTGT	NA	CGCAAAATACTTCATA	TATGAAGTATTTTGCG	4.21269	AGTAAAATACTTCATC	GATGAAGTATTTTACT	3.01597	GCATAAATACTTACTT	AAGTAAGTATTTATGC	4.38376	GCAGAAATACTTAGTA	TACTAAGTATTTCTGC	4.65002	GTAAAAATACTTTATA	TATAAAGTATTTTTAC	0.992662	GCGAAAATACTTTTCA	TGAAAAGTATTTTCGC	0.625143	NA	-1.31558	0.359732	0.271934	1.69683	-1.79664
AAATAGAA	TTCTATTT	4.27343	ACAAAAATAGAAGTCG	CGACTTCTATTTTTGT	NA	CGCAAAATAGAACATA	TATGTTCTATTTTGCG	5.2451	AGTAAAATAGAACATC	GATGTTCTATTTTACT	3.4182	GCATAAATAGAAACTT	AAGTTTCTATTTATGC	0.896397	GCAGAAATAGAAAGTA	TACTTTCTATTTCTGC	2.62272	GTAAAAATAGAATATA	TATATTCTATTTTTAC	NA	GCGAAAATAGAATTCA	TGAATTCTATTTTCGC	0.669388	NA	-0.100035	0.76608	-2.63518	-0.187969	NA
AAATAGAC	GTCTATTT	4.83647	ACAAAAATAGACGTCG	CGACGTCTATTTTTGT	NA	CGCAAAATAGACCATA	TATGGTCTATTTTGCG	4.78993	AGTAAAATAGACCATC	GATGGTCTATTTTACT	3.59084	GCATAAATAGACACTT	AAGTGTCTATTTATGC	3.45984	GCAGAAATAGACAGTA	TACTGTCTATTTCTGC	NA	GTAAAAATAGACTATA	TATAGTCTATTTTTAC	NA	GCGAAAATAGACTTCA	TGAAGTCTATTTTCGC	1.47172	NA	-0.635949	0.940484	-0.49826	NA	NA
AAATAGAG	CTCTATTT	4.31503	ACAAAAATAGAGGTCG	CGACCTCTATTTTTGT	NA	CGCAAAATAGAGCATA	TATGCTCTATTTTGCG	5.44981	AGTAAAATAGAGCATC	GATGCTCTATTTTACT	3.31778	GCATAAATAGAGACTT	AAGTCTCTATTTATGC	3.8165	GCAGAAATAGAGAGTA	TACTCTCTATTTCTGC	2.7998	GTAAAAATAGAGTATA	TATACTCTATTTTTAC	NA	GCGAAAATAGAGTTCA	TGAACTCTATTTTCGC	0.728672	NA	0.140987	0.664624	-0.200942	-0.0233342	NA
AAATAGAT	ATCTATTT	4.11254	ACAAAAATAGATGTCG	CGACATCTATTTTTGT	NA	CGCAAAATAGATCATA	TATGATCTATTTTGCG	4.53446	AGTAAAATAGATCATC	GATGATCTATTTTACT	3.62621	GCATAAATAGATACTT	AAGTATCTATTTATGC	5.06854	GCAGAAATAGATAGTA	TACTATCTATTTCTGC	3.39599	GTAAAAATAGATTATA	TATAATCTATTTTTAC	NA	GCGAAAATAGATTTCA	TGAAATCTATTTTCGC	0.440124	NA	-0.936734	0.976214	0.84278	0.530948	NA
AAATAGCA	TGCTATTT	3.86188	ACAAAAATAGCAGTCG	CGACTGCTATTTTTGT	NA	CGCAAAATAGCACATA	TATGTGCTATTTTGCG	5.45372	AGTAAAATAGCACATC	GATGTGCTATTTTACT	2.78459	GCATAAATAGCAACTT	AAGTTGCTATTTATGC	4.56421	GCAGAAATAGCAAGTA	TACTTGCTATTTCTGC	NA	GTAAAAATAGCATATA	TATATGCTATTTTTAC	2.57837	GCGAAAATAGCATTCA	TGAATGCTATTTTCGC	0.0829342	NA	0.145585	0.125977	0.422359	NA	-0.150702
AAATAGCC	GGCTATTT	3.69173	ACAAAAATAGCCGTCG	CGACGGCTATTTTTGT	NA	CGCAAAATAGCCCATA	TATGGGCTATTTTGCG	5.72336	AGTAAAATAGCCCATC	GATGGGCTATTTTACT	2.57175	GCATAAATAGCCACTT	AAGTGGCTATTTATGC	3.09752	GCAGAAATAGCCAGTA	TACTGGCTATTTCTGC	NA	GTAAAAATAGCCTATA	TATAGGCTATTTTTAC	NA	GCGAAAATAGCCTTCA	TGAAGGCTATTTTCGC	-0.15953	NA	0.463059	-0.0890398	-0.800296	NA	NA
AAATAGCG	CGCTATTT	3.35069	ACAAAAATAGCGGTCG	CGACCGCTATTTTTGT	4.92801	CGCAAAATAGCGCATA	TATGCGCTATTTTGCG	4.98072	AGTAAAATAGCGCATC	GATGCGCTATTTTACT	2.14124	GCATAAATAGCGACTT	AAGTCGCTATTTATGC	4.97024	GCAGAAATAGCGAGTA	TACTCGCTATTTCTGC	4.09609	GTAAAAATAGCGTATA	TATACGCTATTTTTAC	NA	GCGAAAATAGCGTTCA	TGAACGCTATTTTCGC	-0.645509	0.0639301	-0.41131	-0.523948	0.760832	1.18183	NA
AAATAGCT	AGCTATTT	4.61335	ACAAAAATAGCTGTCG	CGACAGCTATTTTTGT	NA	CGCAAAATAGCTCATA	TATGAGCTATTTTGCG	5.32431	AGTAAAATAGCTCATC	GATGAGCTATTTTACT	2.41826	GCATAAATAGCTACTT	AAGTAGCTATTTATGC	3.39766	GCAGAAATAGCTAGTA	TACTAGCTATTTCTGC	NA	GTAAAAATAGCTTATA	TATAAGCTATTTTTAC	2.31523	GCGAAAATAGCTTTCA	TGAAAGCTATTTTCGC	1.15377	NA	-0.00677547	-0.244094	-0.55009	NA	-0.423841
AAATAGGA	TCCTATTT	2.93798	ACAAAAATAGGAGTCG	CGACTCCTATTTTTGT	NA	CGCAAAATAGGACATA	TATGTCCTATTTTGCG	2.96495	AGTAAAATAGGACATC	GATGTCCTATTTTACT	2.75984	GCATAAATAGGAACTT	AAGTTCCTATTTATGC	6.02678	GCAGAAATAGGAAGTA	TACTTCCTATTTCTGC	2.63271	GTAAAAATAGGATATA	TATATCCTATTTTTAC	1.48975	GCGAAAATAGGATTCA	TGAATCCTATTTTCGC	-1.23362	NA	-2.78465	0.100977	1.64158	-0.178679	-1.28067
AAATAGGC	GCCTATTT	4.15273	ACAAAAATAGGCGTCG	CGACGCCTATTTTTGT	NA	CGCAAAATAGGCCATA	TATGGCCTATTTTGCG	5.19784	AGTAAAATAGGCCATC	GATGGCCTATTTTACT	2.12636	GCATAAATAGGCACTT	AAGTGCCTATTTATGC	3.88328	GCAGAAATAGGCAGTA	TACTGCCTATTTCTGC	3.13156	GTAAAAATAGGCTATA	TATAGCCTATTTTTAC	NA	GCGAAAATAGGCTTCA	TGAAGCCTATTTTCGC	0.497396	NA	-0.155673	-0.53899	-0.145273	0.28511	NA
AAATAGGG	CCCTATTT	3.51429	ACAAAAATAGGGGTCG	CGACCCCTATTTTTGT	4.69635	CGCAAAATAGGGCATA	TATGCCCTATTTTGCG	5.36135	AGTAAAATAGGGCATC	GATGCCCTATTTTACT	2.43731	GCATAAATAGGGACTT	AAGTCCCTATTTATGC	2.922	GCAGAAATAGGGAGTA	TACTCCCTATTTCTGC	3.34824	GTAAAAATAGGGTATA	TATACCCTATTTTTAC	1.74439	GCGAAAATAGGGTTCA	TGAACCCTATTTTCGC	-0.41238	-0.244713	0.0368406	-0.224851	-0.946612	0.486559	-1.01636
AAATAGGT	ACCTATTT	3.68597	ACAAAAATAGGTGTCG	CGACACCTATTTTTGT	4.45363	CGCAAAATAGGTCATA	TATGACCTATTTTGCG	4.78628	AGTAAAATAGGTCATC	GATGACCTATTTTACT	1.30281	GCATAAATAGGTACTT	AAGTACCTATTTATGC	2.00292	GCAGAAATAGGTAGTA	TACTACCTATTTCTGC	3.09894	GTAAAAATAGGTTATA	TATAACCTATTTTTAC	2.19716	GCGAAAATAGGTTTCA	TGAAACCTATTTTCGC	-0.167741	-0.568107	-0.640243	-1.37097	-1.71277	0.254781	-0.546396
AAATAGTA	TACTATTT	2.65244	ACAAAAATAGTAGTCG	CGACTACTATTTTTGT	NA	CGCAAAATAGTACATA	TATGTACTATTTTGCG	4.80785	AGTAAAATAGTACATC	GATGTACTATTTTACT	0.666904	GCATAAATAGTAACTT	AAGTTACTATTTATGC	3.25239	GCAGAAATAGTAAGTA	TACTTACTATTTCTGC	3.14447	GTAAAAATAGTATATA	TATATACTATTTTTAC	1.20022	GCGAAAATAGTATTCA	TGAATACTATTTTCGC	-1.64052	NA	-0.614844	-2.01338	-0.671196	0.297104	-1.5812
AAATAGTC	GACTATTT	4.22027	ACAAAAATAGTCGTCG	CGACGACTATTTTTGT	4.7996	CGCAAAATAGTCCATA	TATGGACTATTTTGCG	5.32816	AGTAAAATAGTCCATC	GATGGACTATTTTACT	2.96623	GCATAAATAGTCACTT	AAGTGACTATTTATGC	4.23455	GCAGAAATAGTCAGTA	TACTGACTATTTCTGC	2.19283	GTAAAAATAGTCTATA	TATAGACTATTTTTAC	NA	GCGAAAATAGTCTTCA	TGAAGACTATTTTCGC	0.593632	-0.107158	-0.00223631	0.30948	0.147549	-0.587639	NA
AAATAGTG	CACTATTT	3.85362	ACAAAAATAGTGGTCG	CGACCACTATTTTTGT	4.37102	CGCAAAATAGTGCATA	TATGCACTATTTTGCG	3.84368	AGTAAAATAGTGCATC	GATGCACTATTTTACT	2.06886	GCATAAATAGTGACTT	AAGTCACTATTTATGC	4.02003	GCAGAAATAGTGAGTA	TACTCACTATTTCTGC	2.93159	GTAAAAATAGTGTATA	TATACACTATTTTTAC	1.69091	GCGAAAATAGTGTTCA	TGAACACTATTTTCGC	0.0711609	-0.678176	-1.75005	-0.597072	-0.0312806	0.0991891	-1.07187
AAATAGTT	AACTATTT	3.83155	ACAAAAATAGTTGTCG	CGACAACTATTTTTGT	3.42733	CGCAAAATAGTTCATA	TATGAACTATTTTGCG	5.18441	AGTAAAATAGTTCATC	GATGAACTATTTTACT	1.12617	GCATAAATAGTTACTT	AAGTAACTATTTATGC	2.53836	GCAGAAATAGTTAGTA	TACTAACTATTTCTGC	4.13968	GTAAAAATAGTTTATA	TATAAACTATTTTTAC	2.24498	GCGAAAATAGTTTTCA	TGAAAACTATTTTCGC	0.0397057	-1.9355	-0.171493	-1.54941	-1.26642	1.22237	-0.496762
AAATATAA	TTATATTT	4.20801	ACAAAAATATAAGTCG	CGACTTATATTTTTGT	NA	CGCAAAATATAACATA	TATGTTATATTTTGCG	5.27761	AGTAAAATATAACATC	GATGTTATATTTTACT	2.73458	GCATAAATATAAACTT	AAGTTTATATTTATGC	4.21911	GCAGAAATATAAAGTA	TACTTTATATTTCTGC	2.31108	GTAAAAATATAATATA	TATATTATATTTTTAC	NA	GCGAAAATATAATTCA	TGAATTATATTTTCGC	0.576173	NA	-0.0617622	0.0754602	0.134682	-0.477698	NA
AAATATAC	GTATATTT	3.80005	ACAAAAATATACGTCG	CGACGTATATTTTTGT	NA	CGCAAAATATACCATA	TATGGTATATTTTGCG	5.1668	AGTAAAATATACCATC	GATGGTATATTTTACT	3.49104	GCATAAATATACACTT	AAGTGTATATTTATGC	4.41137	GCAGAAATATACAGTA	TACTGTATATTTCTGC	NA	GTAAAAATATACTATA	TATAGTATATTTTTAC	NA	GCGAAAATATACTTCA	TGAAGTATATTTTCGC	-0.00517265	NA	-0.192226	0.839662	0.294953	NA	NA
AAATATAG	CTATATTT	3.83843	ACAAAAATATAGGTCG	CGACCTATATTTTTGT	4.79638	CGCAAAATATAGCATA	TATGCTATATTTTGCG	5.21685	AGTAAAATATAGCATC	GATGCTATATTTTACT	2.27347	GCATAAATATAGACTT	AAGTCTATATTTATGC	2.54765	GCAGAAATATAGAGTA	TACTCTATATTTCTGC	3.98686	GTAAAAATATAGTATA	TATACTATATTTTTAC	2.77528	GCGAAAATATAGTTCA	TGAACTATATTTTCGC	0.049512	-0.111444	-0.133302	-0.390373	-1.25867	1.08029	0.053686
AAATATAT	ATATATTT	4.2308	ACAAAAATATATGTCG	CGACATATATTTTTGT	4.44284	CGCAAAATATATCATA	TATGATATATTTTGCG	5.12173	AGTAAAATATATCATC	GATGATATATTTTACT	3.13559	GCATAAATATATACTT	AAGTATATATTTATGC	4.24356	GCAGAAATATATAGTA	TACTATATATTTCTGC	4.94606	GTAAAAATATATTATA	TATAATATATTTTTAC	NA	GCGAAAATATATTTCA	TGAAATATATTTTCGC	0.608646	-0.58248	-0.245285	0.480571	0.155062	1.97206	NA
AAATATCA	TGATATTT	5.49446	ACAAAAATATCAGTCG	CGACTGATATTTTTGT	NA	CGCAAAATATCACATA	TATGTGATATTTTGCG	6.0579	AGTAAAATATCACATC	GATGTGATATTTTACT	4.07909	GCATAAATATCAACTT	AAGTTGATATTTATGC	4.79461	GCAGAAATATCAAGTA	TACTTGATATTTCTGC	4.48425	GTAAAAATATCATATA	TATATGATATTTTTAC	NA	GCGAAAATATCATTCA	TGAATGATATTTTCGC	2.40935	NA	0.856943	1.43373	0.614423	1.54271	NA
AAATATCC	GGATATTT	3.89152	ACAAAAATATCCGTCG	CGACGGATATTTTTGT	NA	CGCAAAATATCCCATA	TATGGGATATTTTGCG	5.52325	AGTAAAATATCCCATC	GATGGGATATTTTACT	3.12409	GCATAAATATCCACTT	AAGTGGATATTTATGC	3.46363	GCAGAAATATCCAGTA	TACTGGATATTTCTGC	3.23235	GTAAAAATATCCTATA	TATAGGATATTTTTAC	NA	GCGAAAATATCCTTCA	TGAAGGATATTTTCGC	0.125172	NA	0.227455	0.468956	-0.495098	0.378807	NA
AAATATCG	CGATATTT	3.90033	ACAAAAATATCGGTCG	CGACCGATATTTTTGT	5.76638	CGCAAAATATCGCATA	TATGCGATATTTTGCG	5.92046	AGTAAAATATCGCATC	GATGCGATATTTTACT	2.05908	GCATAAATATCGACTT	AAGTCGATATTTATGC	1.65076	GCAGAAATATCGAGTA	TACTCGATATTTCTGC	3.90639	GTAAAAATATCGTATA	TATACGATATTTTTAC	NA	GCGAAAATATCGTTCA	TGAACGATATTTTCGC	0.13772	1.18094	0.695123	-0.606953	-2.00634	1.00547	NA
AAATATCT	AGATATTT	4.35543	ACAAAAATATCTGTCG	CGACAGATATTTTTGT	NA	CGCAAAATATCTCATA	TATGAGATATTTTGCG	6.06252	AGTAAAATATCTCATC	GATGAGATATTTTACT	3.79661	GCATAAATATCTACTT	AAGTAGATATTTATGC	5.11459	GCAGAAATATCTAGTA	TACTAGATATTTCTGC	4.67916	GTAAAAATATCTTATA	TATAAGATATTTTTAC	NA	GCGAAAATATCTTTCA	TGAAAGATATTTTCGC	0.786244	NA	0.86238	1.14836	0.881168	1.72392	NA
AAATATGA	TCATATTT	5.06499	ACAAAAATATGAGTCG	CGACTCATATTTTTGT	3.23276	CGCAAAATATGACATA	TATGTCATATTTTGCG	6.06512	AGTAAAATATGACATC	GATGTCATATTTTACT	3.45633	GCATAAATATGAACTT	AAGTTCATATTTATGC	3.08171	GCAGAAATATGAAGTA	TACTTCATATTTCTGC	3.80773	GTAAAAATATGATATA	TATATCATATTTTTAC	2.90695	GCGAAAATATGATTCA	TGAATCATATTTTCGC	1.79736	-2.19474	0.86545	0.804593	-0.81347	0.913747	0.19035
AAATATGC	GCATATTT	4.84109	ACAAAAATATGCGTCG	CGACGCATATTTTTGT	4.89107	CGCAAAATATGCCATA	TATGGCATATTTTGCG	5.8204	AGTAAAATATGCCATC	GATGGCATATTTTACT	0.923376	GCATAAATATGCACTT	AAGTGCATATTTATGC	2.76292	GCAGAAATATGCAGTA	TACTGCATATTTCTGC	3.04524	GTAAAAATATGCTATA	TATAGCATATTTTTAC	NA	GCGAAAATATGCTTCA	TGAAGCATATTTTCGC	1.47831	0.0147176	0.577312	-1.75428	-1.07922	0.204852	NA
AAATATGG	CCATATTT	4.22172	ACAAAAATATGGGTCG	CGACCCATATTTTTGT	5.59623	CGCAAAATATGGCATA	TATGCCATATTTTGCG	5.66102	AGTAAAATATGGCATC	GATGCCATATTTTACT	2.71927	GCATAAATATGGACTT	AAGTCCATATTTATGC	2.89572	GCAGAAATATGGAGTA	TACTCCATATTTCTGC	3.02354	GTAAAAATATGGTATA	TATACCATATTTTTAC	1.90563	GCGAAAATATGGTTCA	TGAACCATATTTTCGC	0.595698	0.954243	0.389662	0.0599878	-0.968519	0.184675	-0.849
AAATATGT	ACATATTT	4.38425	ACAAAAATATGTGTCG	CGACACATATTTTTGT	4.99297	CGCAAAATATGTCATA	TATGACATATTTTGCG	5.88211	AGTAAAATATGTCATC	GATGACATATTTTACT	2.75395	GCATAAATATGTACTT	AAGTACATATTTATGC	4.81342	GCAGAAATATGTAGTA	TACTACATATTTCTGC	3.33946	GTAAAAATATGTTATA	TATAACATATTTTTAC	2.90347	GCGAAAATATGTTTCA	TGAAACATATTTTCGC	0.827305	0.150487	0.649966	0.095031	0.630104	0.478396	0.186742
AAATATTA	TAATATTT	4.4472	ACAAAAATATTAGTCG	CGACTAATATTTTTGT	NA	CGCAAAATATTACATA	TATGTAATATTTTGCG	5.16162	AGTAAAATATTACATC	GATGTAATATTTTACT	2.17804	GCATAAATATTAACTT	AAGTTAATATTTATGC	3.4979	GCAGAAATATTAAGTA	TACTTAATATTTCTGC	3.82511	GTAAAAATATTATATA	TATATAATATTTTTAC	NA	GCGAAAATATTATTCA	TGAATAATATTTTCGC	0.917018	NA	-0.198323	-0.486781	-0.466528	0.929907	NA
AAATATTC	GAATATTT	4.46913	ACAAAAATATTCGTCG	CGACGAATATTTTTGT	NA	CGCAAAATATTCCATA	TATGGAATATTTTGCG	5.94716	AGTAAAATATTCCATC	GATGGAATATTTTACT	3.51138	GCATAAATATTCACTT	AAGTGAATATTTATGC	4.11497	GCAGAAATATTCAGTA	TACTGAATATTTCTGC	3.27702	GTAAAAATATTCTATA	TATAGAATATTTTTAC	NA	GCGAAAATATTCTTCA	TGAAGAATATTTTCGC	0.948257	NA	0.726565	0.860211	0.047869	0.420345	NA
AAATATTG	CAATATTT	3.82511	ACAAAAATATTGGTCG	CGACCAATATTTTTGT	4.39514	CGCAAAATATTGCATA	TATGCAATATTTTGCG	5.4115	AGTAAAATATTGCATC	GATGCAATATTTTACT	2.33182	GCATAAATATTGACTT	AAGTCAATATTTATGC	2.78101	GCAGAAATATTGAGTA	TACTCAATATTTCTGC	3.93415	GTAAAAATATTGTATA	TATACAATATTTTTAC	2.04528	GCGAAAATATTGTTCA	TGAACAATATTTTCGC	0.0305324	-0.646035	0.0958848	-0.331418	-1.06414	1.03128	-0.704047
AAATATTT	AAATATTT	4.38624	ACAAAAATATTTGTCG	CGACAAATATTTTTGT	5.21299	CGCAAAATATTTCATA	TATGAAATATTTTGCG	5.72009	AGTAAAATATTTCATC	GATGAAATATTTTACT	2.78056	GCATAAATATTTACTT	AAGTAAATATTTATGC	3.63558	GCAGAAATATTTAGTA	TACTAAATATTTCTGC	4.2996	GTAAAAATATTTTATA	TATAAAATATTTTTAC	2.50762	GCGAAAATATTTTTCA	TGAAAAATATTTTCGC	0.830144	0.443628	0.459211	0.121908	-0.351758	1.37104	-0.224142
AAATCAAA	TTTGATTT	4.82367	ACAAAAATCAAAGTCG	CGACTTTGATTTTTGT	NA	CGCAAAATCAAACATA	TATGTTTGATTTTGCG	2.5264	AGTAAAATCAAACATC	GATGTTTGATTTTACT	1.33952	GCATAAATCAAAACTT	AAGTTTTGATTTATGC	NA	GCAGAAATCAAAAGTA	TACTTTTGATTTCTGC	NA	GTAAAAATCAAATATA	TATATTTGATTTTTAC	NA	GCGAAAATCAAATTCA	TGAATTTGATTTTCGC	1.45348	NA	-3.30099	-1.33388	NA	NA	NA
AAATCAAC	GTTGATTT	4.20612	ACAAAAATCAACGTCG	CGACGTTGATTTTTGT	NA	CGCAAAATCAACCATA	TATGGTTGATTTTGCG	5.69383	AGTAAAATCAACCATC	GATGGTTGATTTTACT	3.009	GCATAAATCAACACTT	AAGTGTTGATTTATGC	4.58177	GCAGAAATCAACAGTA	TACTGTTGATTTCTGC	NA	GTAAAAATCAACTATA	TATAGTTGATTTTTAC	NA	GCGAAAATCAACTTCA	TGAAGTTGATTTTCGC	0.573468	NA	0.428293	0.352687	0.436999	NA	NA
AAATCAAG	CTTGATTT	4.99728	ACAAAAATCAAGGTCG	CGACCTTGATTTTTGT	NA	CGCAAAATCAAGCATA	TATGCTTGATTTTGCG	5.93446	AGTAAAATCAAGCATC	GATGCTTGATTTTACT	2.04641	GCATAAATCAAGACTT	AAGTCTTGATTTATGC	3.47336	GCAGAAATCAAGAGTA	TACTCTTGATTTCTGC	3.14447	GTAAAAATCAAGTATA	TATACTTGATTTTTAC	NA	GCGAAAATCAAGTTCA	TGAACTTGATTTTCGC	1.70087	NA	0.711601	-0.619752	-0.486988	0.297104	NA
AAATCAAT	ATTGATTT	4.40669	ACAAAAATCAATGTCG	CGACATTGATTTTTGT	NA	CGCAAAATCAATCATA	TATGATTGATTTTGCG	2.41138	AGTAAAATCAATCATC	GATGATTGATTTTACT	1.5215	GCATAAATCAATACTT	AAGTATTGATTTATGC	0.439679	GCAGAAATCAATAGTA	TACTATTGATTTCTGC	NA	GTAAAAATCAATTATA	TATAATTGATTTTTAC	NA	GCGAAAATCAATTTCA	TGAAATTGATTTTCGC	0.859282	NA	-3.43641	-1.15004	-3.01591	NA	NA
AAATCACA	TGTGATTT	3.62131	ACAAAAATCACAGTCG	CGACTGTGATTTTTGT	NA	CGCAAAATCACACATA	TATGTGTGATTTTGCG	5.71443	AGTAAAATCACACATC	GATGTGTGATTTTACT	3.6608	GCATAAATCACAACTT	AAGTTGTGATTTATGC	NA	GCAGAAATCACAAGTA	TACTTGTGATTTCTGC	NA	GTAAAAATCACATATA	TATATGTGATTTTTAC	NA	GCGAAAATCACATTCA	TGAATGTGATTTTCGC	-0.259881	NA	0.452543	1.01116	NA	NA	NA
AAATCACC	GGTGATTT	3.56115	ACAAAAATCACCGTCG	CGACGGTGATTTTTGT	NA	CGCAAAATCACCCATA	TATGGGTGATTTTGCG	6.96657	AGTAAAATCACCCATC	GATGGGTGATTTTACT	3.75253	GCATAAATCACCACTT	AAGTGGTGATTTATGC	2.9833	GCAGAAATCACCAGTA	TACTGGTGATTTCTGC	NA	GTAAAAATCACCTATA	TATAGGTGATTTTTAC	NA	GCGAAAATCACCTTCA	TGAAGGTGATTTTCGC	-0.345607	NA	1.9268	1.10383	-0.895511	NA	NA
AAATCACG	CGTGATTT	3.47274	ACAAAAATCACGGTCG	CGACCGTGATTTTTGT	3.67694	CGCAAAATCACGCATA	TATGCGTGATTTTGCG	6.2834	AGTAAAATCACGCATC	GATGCGTGATTTTACT	3.02239	GCATAAATCACGACTT	AAGTCGTGATTTATGC	NA	GCAGAAATCACGAGTA	TACTCGTGATTTCTGC	2.54405	GTAAAAATCACGTATA	TATACGTGATTTTTAC	NA	GCGAAAATCACGTTCA	TGAACGTGATTTTCGC	-0.471589	-1.60294	1.12244	0.36621	NA	-0.261111	NA
AAATCACT	AGTGATTT	4.09016	ACAAAAATCACTGTCG	CGACAGTGATTTTTGT	NA	CGCAAAATCACTCATA	TATGAGTGATTTTGCG	5.86174	AGTAAAATCACTCATC	GATGAGTGATTTTACT	3.34133	GCATAAATCACTACTT	AAGTAGTGATTTATGC	NA	GCAGAAATCACTAGTA	TACTAGTGATTTCTGC	2.45446	GTAAAAATCACTTATA	TATAAGTGATTTTTAC	NA	GCGAAAATCACTTTCA	TGAAAGTGATTTTCGC	0.40823	NA	0.625983	0.688418	NA	-0.3444	NA
AAATCAGA	TCTGATTT	4.28685	ACAAAAATCAGAGTCG	CGACTCTGATTTTTGT	NA	CGCAAAATCAGACATA	TATGTCTGATTTTGCG	5.61269	AGTAAAATCAGACATC	GATGTCTGATTTTACT	2.29881	GCATAAATCAGAACTT	AAGTTCTGATTTATGC	NA	GCAGAAATCAGAAGTA	TACTTCTGATTTCTGC	0.725919	GTAAAAATCAGATATA	TATATCTGATTTTTAC	NA	GCGAAAATCAGATTCA	TGAATCTGATTTTCGC	0.688513	NA	0.332765	-0.364772	NA	-1.95144	NA
AAATCAGC	GCTGATTT	4.61759	ACAAAAATCAGCGTCG	CGACGCTGATTTTTGT	NA	CGCAAAATCAGCCATA	TATGGCTGATTTTGCG	5.45018	AGTAAAATCAGCCATC	GATGGCTGATTTTACT	4.07307	GCATAAATCAGCACTT	AAGTGCTGATTTATGC	NA	GCAGAAATCAGCAGTA	TACTGCTGATTTCTGC	0.874904	GTAAAAATCAGCTATA	TATAGCTGATTTTTAC	NA	GCGAAAATCAGCTTCA	TGAAGCTGATTTTCGC	1.15982	NA	0.141418	1.42764	NA	-1.81292	NA
AAATCAGG	CCTGATTT	2.76019	ACAAAAATCAGGGTCG	CGACCCTGATTTTTGT	5.12132	CGCAAAATCAGGCATA	TATGCCTGATTTTGCG	5.04893	AGTAAAATCAGGCATC	GATGCCTGATTTTACT	NA	GCATAAATCAGGACTT	AAGTCCTGATTTATGC	2.28456	GCAGAAATCAGGAGTA	TACTCCTGATTTCTGC	NA	GTAAAAATCAGGTATA	TATACCTGATTTTTAC	NA	GCGAAAATCAGGTTCA	TGAACCTGATTTTCGC	-1.48697	0.321484	-0.330999	NA	-1.47799	NA	NA
AAATCAGT	ACTGATTT	3.84332	ACAAAAATCAGTGTCG	CGACACTGATTTTTGT	5.42993	CGCAAAATCAGTCATA	TATGACTGATTTTGCG	5.47087	AGTAAAATCAGTCATC	GATGACTGATTTTACT	3.53787	GCATAAATCAGTACTT	AAGTACTGATTTATGC	3.7871	GCAGAAATCAGTAGTA	TACTACTGATTTCTGC	NA	GTAAAAATCAGTTATA	TATAACTGATTTTTAC	NA	GCGAAAATCAGTTTCA	TGAAACTGATTTTCGC	0.0564842	0.732662	0.16578	0.886971	-0.22545	NA	NA
AAATCATA	TATGATTT	4.17404	ACAAAAATCATAGTCG	CGACTATGATTTTTGT	5.03302	CGCAAAATCATACATA	TATGTATGATTTTGCG	5.88756	AGTAAAATCATACATC	GATGTATGATTTTACT	2.94448	GCATAAATCATAACTT	AAGTTATGATTTATGC	3.84562	GCAGAAATCATAAGTA	TACTTATGATTTCTGC	NA	GTAAAAATCATATATA	TATATATGATTTTTAC	NA	GCGAAAATCATATTCA	TGAATATGATTTTCGC	0.527754	0.203849	0.65639	0.287503	-0.17667	NA	NA
AAATCATC	GATGATTT	4.05508	ACAAAAATCATCGTCG	CGACGATGATTTTTGT	NA	CGCAAAATCATCCATA	TATGGATGATTTTGCG	6.42769	AGTAAAATCATCCATC	GATGGATGATTTTACT	4.95827	GCATAAATCATCACTT	AAGTGATGATTTATGC	4.53208	GCAGAAATCATCAGTA	TACTGATGATTTCTGC	0.546459	GTAAAAATCATCTATA	TATAGATGATTTTTAC	NA	GCGAAAATCATCTTCA	TGAAGATGATTTTCGC	0.358237	NA	1.29233	2.32191	0.395576	-2.11828	NA
AAATCATG	CATGATTT	3.64904	ACAAAAATCATGGTCG	CGACCATGATTTTTGT	5.6379	CGCAAAATCATGCATA	TATGCATGATTTTGCG	6.27303	AGTAAAATCATGCATC	GATGCATGATTTTACT	3.94756	GCATAAATCATGACTT	AAGTCATGATTTATGC	4.8827	GCAGAAATCATGAGTA	TACTCATGATTTCTGC	3.97789	GTAAAAATCATGTATA	TATACATGATTTTTAC	NA	GCGAAAATCATGTTCA	TGAACATGATTTTCGC	-0.220362	1.00976	1.11023	1.30085	0.687861	1.07194	NA
AAATCATT	AATGATTT	3.95485	ACAAAAATCATTGTCG	CGACAATGATTTTTGT	NA	CGCAAAATCATTCATA	TATGAATGATTTTGCG	5.19388	AGTAAAATCATTCATC	GATGAATGATTTTACT	2.69197	GCATAAATCATTACTT	AAGTAATGATTTATGC	3.39475	GCAGAAATCATTAGTA	TACTAATGATTTCTGC	NA	GTAAAAATCATTTATA	TATAAATGATTTTTAC	NA	GCGAAAATCATTTTCA	TGAAAATGATTTTCGC	0.215419	NA	-0.160344	0.0324148	-0.552516	NA	NA
AAATCCAA	TTGGATTT	3.93354	ACAAAAATCCAAGTCG	CGACTTGGATTTTTGT	NA	CGCAAAATCCAACATA	TATGTTGGATTTTGCG	5.33219	AGTAAAATCCAACATC	GATGTTGGATTTTACT	2.48734	GCATAAATCCAAACTT	AAGTTTGGATTTATGC	3.51886	GCAGAAATCCAAAGTA	TACTTTGGATTTCTGC	NA	GTAAAAATCCAATATA	TATATTGGATTTTTAC	NA	GCGAAAATCCAATTCA	TGAATTGGATTTTCGC	0.185041	NA	0.00250233	-0.174308	-0.449059	NA	NA
AAATCCAC	GTGGATTT	4.29469	ACAAAAATCCACGTCG	CGACGTGGATTTTTGT	NA	CGCAAAATCCACCATA	TATGGTGGATTTTGCG	4.84169	AGTAAAATCCACCATC	GATGGTGGATTTTACT	1.37355	GCATAAATCCACACTT	AAGTGTGGATTTATGC	NA	GCAGAAATCCACAGTA	TACTGTGGATTTCTGC	NA	GTAAAAATCCACTATA	TATAGTGGATTTTTAC	NA	GCGAAAATCCACTTCA	TGAAGTGGATTTTCGC	0.699691	NA	-0.575007	-1.2995	NA	NA	NA
AAATCCAG	CTGGATTT	4.14371	ACAAAAATCCAGGTCG	CGACCTGGATTTTTGT	NA	CGCAAAATCCAGCATA	TATGCTGGATTTTGCG	6.26678	AGTAAAATCCAGCATC	GATGCTGGATTTTACT	3.16066	GCATAAATCCAGACTT	AAGTCTGGATTTATGC	4.53021	GCAGAAATCCAGAGTA	TACTCTGGATTTCTGC	NA	GTAAAAATCCAGTATA	TATACTGGATTTTTAC	NA	GCGAAAATCCAGTTCA	TGAACTGGATTTTCGC	0.484532	NA	1.10288	0.5059	0.394014	NA	NA
AAATCCAT	ATGGATTT	4.34062	ACAAAAATCCATGTCG	CGACATGGATTTTTGT	NA	CGCAAAATCCATCATA	TATGATGGATTTTGCG	5.04952	AGTAAAATCCATCATC	GATGATGGATTTTACT	2.58707	GCATAAATCCATACTT	AAGTATGGATTTATGC	2.84774	GCAGAAATCCATAGTA	TACTATGGATTTCTGC	NA	GTAAAAATCCATTATA	TATAATGGATTTTTAC	NA	GCGAAAATCCATTTCA	TGAAATGGATTTTCGC	0.765129	NA	-0.330312	-0.0735651	-1.00851	NA	NA
AAATCCCA	TGGGATTT	4.34903	ACAAAAATCCCAGTCG	CGACTGGGATTTTTGT	NA	CGCAAAATCCCACATA	TATGTGGGATTTTGCG	5.21497	AGTAAAATCCCACATC	GATGTGGGATTTTACT	1.00897	GCATAAATCCCAACTT	AAGTTGGGATTTATGC	4.95667	GCAGAAATCCCAAGTA	TACTTGGGATTTCTGC	NA	GTAAAAATCCCATATA	TATATGGGATTTTTAC	NA	GCGAAAATCCCATTCA	TGAATGGGATTTTCGC	0.777117	NA	-0.135508	-1.66781	0.749519	NA	NA
AAATCCCC	GGGGATTT	3.95364	ACAAAAATCCCCGTCG	CGACGGGGATTTTTGT	NA	CGCAAAATCCCCCATA	TATGGGGGATTTTGCG	5.24576	AGTAAAATCCCCCATC	GATGGGGGATTTTACT	2.26209	GCATAAATCCCCACTT	AAGTGGGGATTTATGC	4.7822	GCAGAAATCCCCAGTA	TACTGGGGATTTCTGC	NA	GTAAAAATCCCCTATA	TATAGGGGATTTTTAC	NA	GCGAAAATCCCCTTCA	TGAAGGGGATTTTCGC	0.213696	NA	-0.099258	-0.401865	0.604082	NA	NA
AAATCCCG	CGGGATTT	4.63461	ACAAAAATCCCGGTCG	CGACCGGGATTTTTGT	NA	CGCAAAATCCCGCATA	TATGCGGGATTTTGCG	6.10084	AGTAAAATCCCGCATC	GATGCGGGATTTTACT	2.77398	GCATAAATCCCGACTT	AAGTCGGGATTTATGC	NA	GCAGAAATCCCGAGTA	TACTCGGGATTTCTGC	3.21769	GTAAAAATCCCGTATA	TATACGGGATTTTTAC	NA	GCGAAAATCCCGTTCA	TGAACGGGATTTTCGC	1.18406	NA	0.9075	0.11526	NA	0.365183	NA
AAATCCCT	AGGGATTT	3.57841	ACAAAAATCCCTGTCG	CGACAGGGATTTTTGT	4.36833	CGCAAAATCCCTCATA	TATGAGGGATTTTGCG	5.38274	AGTAAAATCCCTCATC	GATGAGGGATTTTACT	2.60196	GCATAAATCCCTACTT	AAGTAGGGATTTATGC	4.04407	GCAGAAATCCCTAGTA	TACTAGGGATTTCTGC	NA	GTAAAAATCCCTTATA	TATAAGGGATTTTTAC	NA	GCGAAAATCCCTTTCA	TGAAAGGGATTTTCGC	-0.321012	-0.681762	0.0620251	-0.0585143	-0.0112336	NA	NA
AAATCCGA	TCGGATTT	3.81506	ACAAAAATCCGAGTCG	CGACTCGGATTTTTGT	NA	CGCAAAATCCGACATA	TATGTCGGATTTTGCG	5.90787	AGTAAAATCCGACATC	GATGTCGGATTTTACT	2.3379	GCATAAATCCGAACTT	AAGTTCGGATTTATGC	2.4523	GCAGAAATCCGAAGTA	TACTTCGGATTTCTGC	3.20735	GTAAAAATCCGATATA	TATATCGGATTTTTAC	NA	GCGAAAATCCGATTCA	TGAATCGGATTTTCGC	0.0162069	NA	0.680305	-0.325276	-1.33816	0.355569	NA
AAATCCGC	GCGGATTT	3.88763	ACAAAAATCCGCGTCG	CGACGCGGATTTTTGT	NA	CGCAAAATCCGCCATA	TATGGCGGATTTTGCG	3.96137	AGTAAAATCCGCCATC	GATGGCGGATTTTACT	2.60107	GCATAAATCCGCACTT	AAGTGCGGATTTATGC	NA	GCAGAAATCCGCAGTA	TACTGCGGATTTCTGC	2.93604	GTAAAAATCCGCTATA	TATAGCGGATTTTTAC	NA	GCGAAAATCCGCTTCA	TGAAGCGGATTTTCGC	0.119621	NA	-1.61148	-0.0594191	NA	0.103329	NA
AAATCCGG	CCGGATTT	2.74066	ACAAAAATCCGGGTCG	CGACCCGGATTTTTGT	4.85078	CGCAAAATCCGGCATA	TATGCCGGATTTTGCG	5.68393	AGTAAAATCCGGCATC	GATGCCGGATTTTACT	2.73759	GCATAAATCCGGACTT	AAGTCCGGATTTATGC	3.21836	GCAGAAATCCGGAGTA	TACTCCGGATTTCTGC	3.74121	GTAAAAATCCGGTATA	TATACCGGATTTTTAC	NA	GCGAAAATCCGGTTCA	TGAACCGGATTTTCGC	-1.51481	-0.0389652	0.416639	0.0784973	-0.699557	0.851899	NA
AAATCCGT	ACGGATTT	2.82594	ACAAAAATCCGTGTCG	CGACACGGATTTTTGT	5.88952	CGCAAAATCCGTCATA	TATGACGGATTTTGCG	5.65085	AGTAAAATCCGTCATC	GATGACGGATTTTACT	2.27815	GCATAAATCCGTACTT	AAGTACGGATTTATGC	3.95023	GCAGAAATCCGTAGTA	TACTACGGATTTCTGC	3.26198	GTAAAAATCCGTTATA	TATAACGGATTTTTAC	NA	GCGAAAATCCGTTTCA	TGAAACGGATTTTCGC	-1.39328	1.345	0.377689	-0.385643	-0.0894628	0.406362	NA
AAATCCTA	TAGGATTT	3.17781	ACAAAAATCCTAGTCG	CGACTAGGATTTTTGT	NA	CGCAAAATCCTACATA	TATGTAGGATTTTGCG	5.13496	AGTAAAATCCTACATC	GATGTAGGATTTTACT	NA	GCATAAATCCTAACTT	AAGTTAGGATTTATGC	3.5771	GCAGAAATCCTAAGTA	TACTTAGGATTTCTGC	NA	GTAAAAATCCTATATA	TATATAGGATTTTTAC	NA	GCGAAAATCCTATTCA	TGAATAGGATTTTCGC	-0.891871	NA	-0.229712	NA	-0.40051	NA	NA
AAATCCTC	GAGGATTT	2.64848	ACAAAAATCCTCGTCG	CGACGAGGATTTTTGT	NA	CGCAAAATCCTCCATA	TATGGAGGATTTTGCG	4.09157	AGTAAAATCCTCCATC	GATGGAGGATTTTACT	1.37422	GCATAAATCCTCACTT	AAGTGAGGATTTATGC	3.85878	GCAGAAATCCTCAGTA	TACTGAGGATTTCTGC	NA	GTAAAAATCCTCTATA	TATAGAGGATTTTTAC	NA	GCGAAAATCCTCTTCA	TGAAGAGGATTTTCGC	-1.64616	NA	-1.45819	-1.29882	-0.165698	NA	NA
AAATCCTG	CAGGATTT	2.46229	ACAAAAATCCTGGTCG	CGACCAGGATTTTTGT	NA	CGCAAAATCCTGCATA	TATGCAGGATTTTGCG	3.64381	AGTAAAATCCTGCATC	GATGCAGGATTTTACT	NA	GCATAAATCCTGACTT	AAGTCAGGATTTATGC	3.61681	GCAGAAATCCTGAGTA	TACTCAGGATTTCTGC	2.66883	GTAAAAATCCTGTATA	TATACAGGATTTTTAC	NA	GCGAAAATCCTGTTCA	TGAACAGGATTTTCGC	-1.91149	NA	-1.98537	NA	-0.367408	-0.1451	NA
AAATCCTT	AAGGATTT	1.9433	ACAAAAATCCTTGTCG	CGACAAGGATTTTTGT	2.21221	CGCAAAATCCTTCATA	TATGAAGGATTTTGCG	0.924136	AGTAAAATCCTTCATC	GATGAAGGATTTTACT	1.25919	GCATAAATCCTTACTT	AAGTAAGGATTTATGC	3.64314	GCAGAAATCCTTAGTA	TACTAAGGATTTCTGC	3.2375	GTAAAAATCCTTTATA	TATAAAGGATTTTTAC	NA	GCGAAAATCCTTTTCA	TGAAAAGGATTTTCGC	-2.65104	-3.55447	-5.18747	-1.41503	-0.345459	0.383596	NA
AAATCGAA	TTCGATTT	4.04813	ACAAAAATCGAAGTCG	CGACTTCGATTTTTGT	NA	CGCAAAATCGAACATA	TATGTTCGATTTTGCG	NA	AGTAAAATCGAACATC	GATGTTCGATTTTACT	1.7703	GCATAAATCGAAACTT	AAGTTTCGATTTATGC	2.22295	GCAGAAATCGAAAGTA	TACTTTCGATTTCTGC	NA	GTAAAAATCGAATATA	TATATTCGATTTTTAC	NA	GCGAAAATCGAATTCA	TGAATTCGATTTTCGC	0.348334	NA	NA	-0.89869	-1.52935	NA	NA
AAATCGAC	GTCGATTT	4.24883	ACAAAAATCGACGTCG	CGACGTCGATTTTTGT	NA	CGCAAAATCGACCATA	TATGGTCGATTTTGCG	4.99893	AGTAAAATCGACCATC	GATGGTCGATTTTACT	2.20436	GCATAAATCGACACTT	AAGTGTCGATTTATGC	3.90653	GCAGAAATCGACAGTA	TACTGTCGATTTCTGC	3.06654	GTAAAAATCGACTATA	TATAGTCGATTTTTAC	NA	GCGAAAATCGACTTCA	TGAAGTCGATTTTCGC	0.63433	NA	-0.389868	-0.460188	-0.125891	0.224654	NA
AAATCGAG	CTCGATTT	3.94984	ACAAAAATCGAGGTCG	CGACCTCGATTTTTGT	NA	CGCAAAATCGAGCATA	TATGCTCGATTTTGCG	5.97446	AGTAAAATCGAGCATC	GATGCTCGATTTTACT	2.93248	GCATAAATCGAGACTT	AAGTCTCGATTTATGC	3.54294	GCAGAAATCGAGAGTA	TACTCTCGATTTCTGC	1.91077	GTAAAAATCGAGTATA	TATACTCGATTTTTAC	NA	GCGAAAATCGAGTTCA	TGAACTCGATTTTCGC	0.208275	NA	0.758704	0.275381	-0.428988	-0.849875	NA
AAATCGAT	ATCGATTT	4.34378	ACAAAAATCGATGTCG	CGACATCGATTTTTGT	3.40875	CGCAAAATCGATCATA	TATGATCGATTTTGCG	4.72094	AGTAAAATCGATCATC	GATGATCGATTTTACT	NA	GCATAAATCGATACTT	AAGTATCGATTTATGC	1.5778	GCAGAAATCGATAGTA	TACTATCGATTTCTGC	1.18412	GTAAAAATCGATTATA	TATAATCGATTTTTAC	NA	GCGAAAATCGATTTCA	TGAAATCGATTTTCGC	0.769632	-1.96025	-0.717169	NA	-2.06715	-1.52544	NA
AAATCGCA	TGCGATTT	3.92969	ACAAAAATCGCAGTCG	CGACTGCGATTTTTGT	NA	CGCAAAATCGCACATA	TATGTGCGATTTTGCG	5.68721	AGTAAAATCGCACATC	GATGTGCGATTTTACT	2.51613	GCATAAATCGCAACTT	AAGTTGCGATTTATGC	3.83021	GCAGAAATCGCAAGTA	TACTTGCGATTTCTGC	3.31238	GTAAAAATCGCATATA	TATATGCGATTTTTAC	NA	GCGAAAATCGCATTCA	TGAATGCGATTTTCGC	0.179562	NA	0.420496	-0.145228	-0.189512	0.453215	NA
AAATCGCC	GGCGATTT	3.57713	ACAAAAATCGCCGTCG	CGACGGCGATTTTTGT	NA	CGCAAAATCGCCCATA	TATGGGCGATTTTGCG	5.03862	AGTAAAATCGCCCATC	GATGGGCGATTTTACT	3.42805	GCATAAATCGCCACTT	AAGTGGCGATTTATGC	4.59994	GCAGAAATCGCCAGTA	TACTGGCGATTTCTGC	1.98212	GTAAAAATCGCCTATA	TATAGGCGATTTTTAC	NA	GCGAAAATCGCCTTCA	TGAAGGCGATTTTCGC	-0.322841	NA	-0.343141	0.77603	0.452143	-0.783536	NA
AAATCGCG	CGCGATTT	3.92987	ACAAAAATCGCGGTCG	CGACCGCGATTTTTGT	4.13914	CGCAAAATCGCGCATA	TATGCGCGATTTTGCG	6.08508	AGTAAAATCGCGCATC	GATGCGCGATTTTACT	2.6784	GCATAAATCGCGACTT	AAGTCGCGATTTATGC	5.34057	GCAGAAATCGCGAGTA	TACTCGCGATTTCTGC	3.6228	GTAAAAATCGCGTATA	TATACGCGATTTTTAC	NA	GCGAAAATCGCGTTCA	TGAACGCGATTTTCGC	0.179819	-0.987125	0.88894	0.0187066	1.06955	0.741817	NA
AAATCGCT	AGCGATTT	4.49222	ACAAAAATCGCTGTCG	CGACAGCGATTTTTGT	4.83251	CGCAAAATCGCTCATA	TATGAGCGATTTTGCG	5.68312	AGTAAAATCGCTCATC	GATGAGCGATTTTACT	3.34184	GCATAAATCGCTACTT	AAGTAGCGATTTATGC	4.2863	GCAGAAATCGCTAGTA	TACTAGCGATTTCTGC	2.42194	GTAAAAATCGCTTATA	TATAAGCGATTTTTAC	NA	GCGAAAATCGCTTTCA	TGAAAGCGATTTTCGC	0.981167	-0.0633056	0.415679	0.688934	0.190687	-0.37463	NA
AAATCGGA	TCCGATTT	3.51443	ACAAAAATCGGAGTCG	CGACTCCGATTTTTGT	3.78561	CGCAAAATCGGACATA	TATGTCCGATTTTGCG	5.37143	AGTAAAATCGGACATC	GATGTCCGATTTTACT	1.90754	GCATAAATCGGAACTT	AAGTTCCGATTTATGC	5.81056	GCAGAAATCGGAAGTA	TACTTCCGATTTCTGC	2.83078	GTAAAAATCGGATATA	TATATCCGATTTTTAC	NA	GCGAAAATCGGATTCA	TGAATCCGATTTTCGC	-0.41219	-1.45815	0.0486987	-0.760049	1.46133	0.00546473	NA
AAATCGGC	GCCGATTT	3.96688	ACAAAAATCGGCGTCG	CGACGCCGATTTTTGT	4.01863	CGCAAAATCGGCCATA	TATGGCCGATTTTGCG	4.88285	AGTAAAATCGGCCATC	GATGGCCGATTTTACT	3.11623	GCATAAATCGGCACTT	AAGTGCCGATTTATGC	4.21386	GCAGAAATCGGCAGTA	TACTGCCGATTTCTGC	1.18674	GTAAAAATCGGCTATA	TATAGCCGATTTTTAC	NA	GCGAAAATCGGCTTCA	TGAAGCCGATTTTCGC	0.232559	-1.14768	-0.526542	0.461018	0.130306	-1.52301	NA
AAATCGGG	CCCGATTT	4.08444	ACAAAAATCGGGGTCG	CGACCCCGATTTTTGT	NA	CGCAAAATCGGGCATA	TATGCCCGATTTTGCG	5.33821	AGTAAAATCGGGCATC	GATGCCCGATTTTACT	3.02607	GCATAAATCGGGACTT	AAGTCCCGATTTATGC	3.65119	GCAGAAATCGGGAGTA	TACTCCCGATTTCTGC	3.21246	GTAAAAATCGGGTATA	TATACCCGATTTTTAC	NA	GCGAAAATCGGGTTCA	TGAACCCGATTTTCGC	0.400073	NA	0.00959356	0.369929	-0.338751	0.360316	NA
AAATCGGT	ACCGATTT	3.37463	ACAAAAATCGGTGTCG	CGACACCGATTTTTGT	4.80924	CGCAAAATCGGTCATA	TATGACCGATTTTGCG	4.94932	AGTAAAATCGGTCATC	GATGACCGATTTTACT	2.73515	GCATAAATCGGTACTT	AAGTACCGATTTATGC	2.25415	GCAGAAATCGGTAGTA	TACTACCGATTTCTGC	2.35619	GTAAAAATCGGTTATA	TATAACCGATTTTTAC	NA	GCGAAAATCGGTTTCA	TGAAACCGATTTTCGC	-0.611404	-0.0943042	-0.448278	0.07604	-1.50334	-0.435757	NA
AAATCGTA	TACGATTT	3.32762	ACAAAAATCGTAGTCG	CGACTACGATTTTTGT	5.21974	CGCAAAATCGTACATA	TATGTACGATTTTGCG	5.31271	AGTAAAATCGTACATC	GATGTACGATTTTACT	1.92593	GCATAAATCGTAACTT	AAGTTACGATTTATGC	4.1216	GCAGAAATCGTAAGTA	TACTTACGATTTCTGC	3.80141	GTAAAAATCGTATATA	TATATACGATTTTTAC	NA	GCGAAAATCGTATTCA	TGAATACGATTTTCGC	-0.678394	0.452619	-0.0204316	-0.741466	0.0533949	0.907876	NA
AAATCGTC	GACGATTT	4.0301	ACAAAAATCGTCGTCG	CGACGACGATTTTTGT	NA	CGCAAAATCGTCCATA	TATGGACGATTTTGCG	5.38198	AGTAAAATCGTCCATC	GATGGACGATTTTACT	3.18281	GCATAAATCGTCACTT	AAGTGACGATTTATGC	3.51999	GCAGAAATCGTCAGTA	TACTGACGATTTCTGC	3.33421	GTAAAAATCGTCTATA	TATAGACGATTTTTAC	NA	GCGAAAATCGTCTTCA	TGAAGACGATTTTCGC	0.322649	NA	0.0611281	0.52828	-0.448118	0.473508	NA
AAATCGTG	CACGATTT	3.4697	ACAAAAATCGTGGTCG	CGACCACGATTTTTGT	5.49633	CGCAAAATCGTGCATA	TATGCACGATTTTGCG	5.36099	AGTAAAATCGTGCATC	GATGCACGATTTTACT	2.80184	GCATAAATCGTGACTT	AAGTCACGATTTATGC	5.01651	GCAGAAATCGTGAGTA	TACTCACGATTTCTGC	3.55531	GTAAAAATCGTGTATA	TATACACGATTTTTAC	NA	GCGAAAATCGTGTTCA	TGAACACGATTTTCGC	-0.475931	0.821139	0.0364161	0.143411	0.799404	0.679066	NA
AAATCGTT	AACGATTT	3.7852	ACAAAAATCGTTGTCG	CGACAACGATTTTTGT	5.37554	CGCAAAATCGTTCATA	TATGAACGATTTTGCG	5.36872	AGTAAAATCGTTCATC	GATGAACGATTTTACT	2.12517	GCATAAATCGTTACTT	AAGTAACGATTTATGC	2.87799	GCAGAAATCGTTAGTA	TACTAACGATTTCTGC	2.15301	GTAAAAATCGTTTATA	TATAAACGATTTTTAC	NA	GCGAAAATCGTTTTCA	TGAAAACGATTTTCGC	-0.026335	0.660207	0.0455089	-0.540192	-0.9833	-0.624659	NA
AAATCTAA	TTAGATTT	4.23936	ACAAAAATCTAAGTCG	CGACTTAGATTTTTGT	NA	CGCAAAATCTAACATA	TATGTTAGATTTTGCG	5.175	AGTAAAATCTAACATC	GATGTTAGATTTTACT	2.98795	GCATAAATCTAAACTT	AAGTTTAGATTTATGC	4.29656	GCAGAAATCTAAAGTA	TACTTTAGATTTCTGC	NA	GTAAAAATCTAATATA	TATATTAGATTTTTAC	NA	GCGAAAATCTAATTCA	TGAATTAGATTTTCGC	0.620833	NA	-0.182576	0.331421	0.199241	NA	NA
AAATCTAC	GTAGATTT	3.41574	ACAAAAATCTACGTCG	CGACGTAGATTTTTGT	NA	CGCAAAATCTACCATA	TATGGTAGATTTTGCG	5.15309	AGTAAAATCTACCATC	GATGGTAGATTTTACT	2.59604	GCATAAATCTACACTT	AAGTGTAGATTTATGC	4.36013	GCAGAAATCTACAGTA	TACTGTAGATTTCTGC	NA	GTAAAAATCTACTATA	TATAGTAGATTTTTAC	NA	GCGAAAATCTACTTCA	TGAAGTAGATTTTCGC	-0.552818	NA	-0.208363	-0.064494	0.25224	NA	NA
AAATCTAG	CTAGATTT	3.83366	ACAAAAATCTAGGTCG	CGACCTAGATTTTTGT	NA	CGCAAAATCTAGCATA	TATGCTAGATTTTGCG	5.37375	AGTAAAATCTAGCATC	GATGCTAGATTTTACT	1.95356	GCATAAATCTAGACTT	AAGTCTAGATTTATGC	4.69631	GCAGAAATCTAGAGTA	TACTCTAGATTTCTGC	3.0762	GTAAAAATCTAGTATA	TATACTAGATTTTTAC	NA	GCGAAAATCTAGTTCA	TGAACTAGATTTTCGC	0.0427223	NA	0.0514374	-0.713555	0.532477	0.233636	NA
AAATCTAT	ATAGATTT	4.226	ACAAAAATCTATGTCG	CGACATAGATTTTTGT	4.04011	CGCAAAATCTATCATA	TATGATAGATTTTGCG	5.04703	AGTAAAATCTATCATC	GATGATAGATTTTACT	3.30124	GCATAAATCTATACTT	AAGTATAGATTTATGC	3.47852	GCAGAAATCTATAGTA	TACTATAGATTTCTGC	1.90244	GTAAAAATCTATTATA	TATAATAGATTTTTAC	NA	GCGAAAATCTATTTCA	TGAAATAGATTTTCGC	0.601799	-1.11906	-0.333239	0.647916	-0.482691	-0.857616	NA
AAATCTCA	TGAGATTT	3.78547	ACAAAAATCTCAGTCG	CGACTGAGATTTTTGT	NA	CGCAAAATCTCACATA	TATGTGAGATTTTGCG	5.24032	AGTAAAATCTCACATC	GATGTGAGATTTTACT	2.71726	GCATAAATCTCAACTT	AAGTTGAGATTTATGC	5.07223	GCAGAAATCTCAAGTA	TACTTGAGATTTCTGC	3.80943	GTAAAAATCTCATATA	TATATGAGATTTTTAC	NA	GCGAAAATCTCATTCA	TGAATGAGATTTTCGC	-0.0259556	NA	-0.105661	0.0579622	0.845849	0.915324	NA
AAATCTCC	GGAGATTT	3.33593	ACAAAAATCTCCGTCG	CGACGGAGATTTTTGT	NA	CGCAAAATCTCCCATA	TATGGGAGATTTTGCG	5.94948	AGTAAAATCTCCCATC	GATGGGAGATTTTACT	1.52319	GCATAAATCTCCACTT	AAGTGGAGATTTATGC	4.67881	GCAGAAATCTCCAGTA	TACTGGAGATTTCTGC	NA	GTAAAAATCTCCTATA	TATAGGAGATTTTTAC	NA	GCGAAAATCTCCTTCA	TGAAGGAGATTTTCGC	-0.666543	NA	0.729293	-1.14833	0.51789	NA	NA
AAATCTCG	CGAGATTT	4.06625	ACAAAAATCTCGGTCG	CGACCGAGATTTTTGT	5.18054	CGCAAAATCTCGCATA	TATGCGAGATTTTGCG	5.47696	AGTAAAATCTCGCATC	GATGCGAGATTTTACT	3.14938	GCATAAATCTCGACTT	AAGTCGAGATTTATGC	4.55983	GCAGAAATCTCGAGTA	TACTCGAGATTTCTGC	3.95783	GTAAAAATCTCGTATA	TATACGAGATTTTTAC	NA	GCGAAAATCTCGTTCA	TGAACGAGATTTTCGC	0.374161	0.400388	0.172959	0.494506	0.418707	1.05329	NA
AAATCTCT	AGAGATTT	4.19577	ACAAAAATCTCTGTCG	CGACAGAGATTTTTGT	NA	CGCAAAATCTCTCATA	TATGAGAGATTTTGCG	5.2406	AGTAAAATCTCTCATC	GATGAGAGATTTTACT	3.23499	GCATAAATCTCTACTT	AAGTAGAGATTTATGC	4.96	GCAGAAATCTCTAGTA	TACTAGAGATTTCTGC	3.45006	GTAAAAATCTCTTATA	TATAAGAGATTTTTAC	NA	GCGAAAATCTCTTTCA	TGAAAGAGATTTTCGC	0.558725	NA	-0.105337	0.580991	0.752295	0.581217	NA
AAATCTGA	TCAGATTT	4.35556	ACAAAAATCTGAGTCG	CGACTCAGATTTTTGT	4.00433	CGCAAAATCTGACATA	TATGTCAGATTTTGCG	5.58724	AGTAAAATCTGACATC	GATGTCAGATTTTACT	2.7196	GCATAAATCTGAACTT	AAGTTCAGATTTATGC	3.45236	GCAGAAATCTGAAGTA	TACTTCAGATTTCTGC	2.25069	GTAAAAATCTGATATA	TATATCAGATTTTTAC	NA	GCGAAAATCTGATTCA	TGAATCAGATTTTCGC	0.786428	-1.16674	0.302793	0.0603217	-0.504495	-0.533844	NA
AAATCTGC	GCAGATTT	4.08287	ACAAAAATCTGCGTCG	CGACGCAGATTTTTGT	3.79697	CGCAAAATCTGCCATA	TATGGCAGATTTTGCG	5.59579	AGTAAAATCTGCCATC	GATGGCAGATTTTACT	2.34652	GCATAAATCTGCACTT	AAGTGCAGATTTATGC	2.45304	GCAGAAATCTGCAGTA	TACTGCAGATTTCTGC	NA	GTAAAAATCTGCTATA	TATAGCAGATTTTTAC	NA	GCGAAAATCTGCTTCA	TGAAGCAGATTTTCGC	0.397838	-1.44301	0.312859	-0.316574	-1.33754	NA	NA
AAATCTGG	CCAGATTT	4.09553	ACAAAAATCTGGGTCG	CGACCCAGATTTTTGT	4.64618	CGCAAAATCTGGCATA	TATGCCAGATTTTGCG	6.24337	AGTAAAATCTGGCATC	GATGCCAGATTTTACT	2.68428	GCATAAATCTGGACTT	AAGTCCAGATTTATGC	3.69024	GCAGAAATCTGGAGTA	TACTCCAGATTTCTGC	3.55489	GTAAAAATCTGGTATA	TATACCAGATTTTTAC	NA	GCGAAAATCTGGTTCA	TGAACCAGATTTTCGC	0.415882	-0.311562	1.07531	0.0246434	-0.306194	0.678676	NA
AAATCTGT	ACAGATTT	4.60887	ACAAAAATCTGTGTCG	CGACACAGATTTTTGT	5.11194	CGCAAAATCTGTCATA	TATGACAGATTTTGCG	5.8622	AGTAAAATCTGTCATC	GATGACAGATTTTACT	3.00775	GCATAAATCTGTACTT	AAGTACAGATTTATGC	4.64357	GCAGAAATCTGTAGTA	TACTACAGATTTCTGC	3.35102	GTAAAAATCTGTTATA	TATAACAGATTTTTAC	NA	GCGAAAATCTGTTTCA	TGAAACAGATTTTCGC	1.14739	0.308997	0.626525	0.35143	0.488518	0.489135	NA
AAATCTTA	TAAGATTT	3.97062	ACAAAAATCTTAGTCG	CGACTAAGATTTTTGT	NA	CGCAAAATCTTACATA	TATGTAAGATTTTGCG	5.55654	AGTAAAATCTTACATC	GATGTAAGATTTTACT	1.74479	GCATAAATCTTAACTT	AAGTTAAGATTTATGC	4.44287	GCAGAAATCTTAAGTA	TACTTAAGATTTCTGC	3.71694	GTAAAAATCTTATATA	TATATAAGATTTTTAC	NA	GCGAAAATCTTATTCA	TGAATAAGATTTTCGC	0.237888	NA	0.266648	-0.924459	0.321212	0.829336	NA
AAATCTTC	GAAGATTT	4.39021	ACAAAAATCTTCGTCG	CGACGAAGATTTTTGT	NA	CGCAAAATCTTCCATA	TATGGAAGATTTTGCG	5.56933	AGTAAAATCTTCCATC	GATGGAAGATTTTACT	1.71397	GCATAAATCTTCACTT	AAGTGAAGATTTATGC	4.21615	GCAGAAATCTTCAGTA	TACTGAAGATTTCTGC	3.41638	GTAAAAATCTTCTATA	TATAGAAGATTTTTAC	NA	GCGAAAATCTTCTTCA	TGAAGAAGATTTTCGC	0.835802	NA	0.281709	-0.955595	0.132211	0.549901	NA
AAATCTTG	CAAGATTT	3.10918	ACAAAAATCTTGGTCG	CGACCAAGATTTTTGT	5.36482	CGCAAAATCTTGCATA	TATGCAAGATTTTGCG	5.70827	AGTAAAATCTTGCATC	GATGCAAGATTTTACT	1.96145	GCATAAATCTTGACTT	AAGTCAAGATTTATGC	4.69111	GCAGAAATCTTGAGTA	TACTCAAGATTTCTGC	3.60432	GTAAAAATCTTGTATA	TATACAAGATTTTTAC	NA	GCGAAAATCTTGTTCA	TGAACAAGATTTTCGC	-0.989663	0.645916	0.44529	-0.705588	0.528147	0.724635	NA
AAATCTTT	AAAGATTT	4.35845	ACAAAAATCTTTGTCG	CGACAAAGATTTTTGT	NA	CGCAAAATCTTTCATA	TATGAAAGATTTTGCG	4.95628	AGTAAAATCTTTCATC	GATGAAAGATTTTACT	2.36751	GCATAAATCTTTACTT	AAGTAAAGATTTATGC	4.58589	GCAGAAATCTTTAGTA	TACTAAAGATTTCTGC	3.12892	GTAAAAATCTTTTATA	TATAAAAGATTTTTAC	NA	GCGAAAATCTTTTTCA	TGAAAAAGATTTTCGC	0.790538	NA	-0.440087	-0.295369	0.440433	0.282651	NA
AAATGAAA	TTTCATTT	3.93169	ACAAAAATGAAAGTCG	CGACTTTCATTTTTGT	NA	CGCAAAATGAAACATA	TATGTTTCATTTTGCG	5.49797	AGTAAAATGAAACATC	GATGTTTCATTTTACT	2.15975	GCATAAATGAAAACTT	AAGTTTTCATTTATGC	2.99126	GCAGAAATGAAAAGTA	TACTTTTCATTTCTGC	NA	GTAAAAATGAAATATA	TATATTTCATTTTTAC	2.55521	GCGAAAATGAAATTCA	TGAATTTCATTTTCGC	0.182406	NA	0.197687	-0.505256	-0.888873	NA	-0.174743
AAATGAAC	GTTCATTT	4.16536	ACAAAAATGAACGTCG	CGACGTTCATTTTTGT	NA	CGCAAAATGAACCATA	TATGGTTCATTTTGCG	5.97268	AGTAAAATGAACCATC	GATGGTTCATTTTACT	1.58335	GCATAAATGAACACTT	AAGTGTTCATTTATGC	NA	GCAGAAATGAACAGTA	TACTGTTCATTTCTGC	NA	GTAAAAATGAACTATA	TATAGTTCATTTTTAC	NA	GCGAAAATGAACTTCA	TGAAGTTCATTTTCGC	0.515395	NA	0.756606	-1.08755	NA	NA	NA
AAATGAAG	CTTCATTT	3.44145	ACAAAAATGAAGGTCG	CGACCTTCATTTTTGT	5.30027	CGCAAAATGAAGCATA	TATGCTTCATTTTGCG	5.2232	AGTAAAATGAAGCATC	GATGCTTCATTTTACT	1.24426	GCATAAATGAAGACTT	AAGTCTTCATTTATGC	3.94549	GCAGAAATGAAGAGTA	TACTCTTCATTTCTGC	2.82387	GTAAAAATGAAGTATA	TATACTTCATTTTTAC	NA	GCGAAAATGAAGTTCA	TGAACTTCATTTTCGC	-0.516183	0.559917	-0.125825	-1.43012	-0.0934175	-0.000951649	NA
AAATGAAT	ATTCATTT	3.88903	ACAAAAATGAATGTCG	CGACATTCATTTTTGT	NA	CGCAAAATGAATCATA	TATGATTCATTTTGCG	6.86156	AGTAAAATGAATCATC	GATGATTCATTTTACT	2.68403	GCATAAATGAATACTT	AAGTATTCATTTATGC	3.60681	GCAGAAATGAATAGTA	TACTATTCATTTCTGC	NA	GTAAAAATGAATTATA	TATAATTCATTTTTAC	NA	GCGAAAATGAATTTCA	TGAAATTCATTTTCGC	0.121614	NA	1.80317	0.0243963	-0.375746	NA	NA
AAATGACA	TGTCATTT	2.95725	ACAAAAATGACAGTCG	CGACTGTCATTTTTGT	NA	CGCAAAATGACACATA	TATGTGTCATTTTGCG	5.63284	AGTAAAATGACACATC	GATGTGTCATTTTACT	2.27588	GCATAAATGACAACTT	AAGTTGTCATTTATGC	NA	GCAGAAATGACAAGTA	TACTTGTCATTTCTGC	3.28054	GTAAAAATGACATATA	TATATGTCATTTTTAC	NA	GCGAAAATGACATTCA	TGAATGTCATTTTCGC	-1.20616	NA	0.356489	-0.38793	NA	0.423612	NA
AAATGACC	GGTCATTT	3.38085	ACAAAAATGACCGTCG	CGACGGTCATTTTTGT	NA	CGCAAAATGACCCATA	TATGGGTCATTTTGCG	5.87587	AGTAAAATGACCCATC	GATGGGTCATTTTACT	2.19629	GCATAAATGACCACTT	AAGTGGTCATTTATGC	NA	GCAGAAATGACCAGTA	TACTGGTCATTTCTGC	NA	GTAAAAATGACCTATA	TATAGGTCATTTTTAC	NA	GCGAAAATGACCTTCA	TGAAGGTCATTTTCGC	-0.602538	NA	0.642626	-0.468342	NA	NA	NA
AAATGACG	CGTCATTT	3.17666	ACAAAAATGACGGTCG	CGACCGTCATTTTTGT	NA	CGCAAAATGACGCATA	TATGCGTCATTTTGCG	5.94543	AGTAAAATGACGCATC	GATGCGTCATTTTACT	2.78633	GCATAAATGACGACTT	AAGTCGTCATTTATGC	NA	GCAGAAATGACGAGTA	TACTCGTCATTTCTGC	3.20692	GTAAAAATGACGTATA	TATACGTCATTTTTAC	NA	GCGAAAATGACGTTCA	TGAACGTCATTTTCGC	-0.893507	NA	0.724517	0.127737	NA	0.355168	NA
AAATGACT	AGTCATTT	4.45815	ACAAAAATGACTGTCG	CGACAGTCATTTTTGT	NA	CGCAAAATGACTCATA	TATGAGTCATTTTGCG	6.44067	AGTAAAATGACTCATC	GATGAGTCATTTTACT	3.33269	GCATAAATGACTACTT	AAGTAGTCATTTATGC	4.53402	GCAGAAATGACTAGTA	TACTAGTCATTTCTGC	3.60448	GTAAAAATGACTTATA	TATAAGTCATTTTTAC	NA	GCGAAAATGACTTTCA	TGAAAGTCATTTTCGC	0.932616	NA	1.30761	0.67969	0.397191	0.724784	NA
AAATGAGA	TCTCATTT	3.59123	ACAAAAATGAGAGTCG	CGACTCTCATTTTTGT	NA	CGCAAAATGAGACATA	TATGTCTCATTTTGCG	6.24215	AGTAAAATGAGACATC	GATGTCTCATTTTACT	2.73288	GCATAAATGAGAACTT	AAGTTCTCATTTATGC	NA	GCAGAAATGAGAAGTA	TACTTCTCATTTCTGC	4.00676	GTAAAAATGAGATATA	TATATCTCATTTTTAC	2.80447	GCGAAAATGAGATTCA	TGAATCTCATTTTCGC	-0.302744	NA	1.07388	0.0737435	NA	1.09878	0.0839752
AAATGAGC	GCTCATTT	4.03197	ACAAAAATGAGCGTCG	CGACGCTCATTTTTGT	NA	CGCAAAATGAGCCATA	TATGGCTCATTTTGCG	4.99222	AGTAAAATGAGCCATC	GATGGCTCATTTTACT	2.68287	GCATAAATGAGCACTT	AAGTGCTCATTTATGC	NA	GCAGAAATGAGCAGTA	TACTGCTCATTTCTGC	2.37176	GTAAAAATGAGCTATA	TATAGCTCATTTTTAC	NA	GCGAAAATGAGCTTCA	TGAAGCTCATTTTCGC	0.325305	NA	-0.397777	0.0232167	NA	-0.421286	NA
AAATGAGG	CCTCATTT	3.3806	ACAAAAATGAGGGTCG	CGACCCTCATTTTTGT	4.82995	CGCAAAATGAGGCATA	TATGCCTCATTTTGCG	5.78683	AGTAAAATGAGGCATC	GATGCCTCATTTTACT	0.78369	GCATAAATGAGGACTT	AAGTCCTCATTTATGC	4.12724	GCAGAAATGAGGAGTA	TACTCCTCATTTCTGC	0.503248	GTAAAAATGAGGTATA	TATACCTCATTTTTAC	1.08377	GCGAAAATGAGGTTCA	TGAACCTCATTTTCGC	-0.602893	-0.0667217	0.537785	-1.8954	0.0580969	-2.15846	-1.70207
AAATGAGT	ACTCATTT	4.12373	ACAAAAATGAGTGTCG	CGACACTCATTTTTGT	6.72439	CGCAAAATGAGTCATA	TATGACTCATTTTGCG	6.56523	AGTAAAATGAGTCATC	GATGACTCATTTTACT	2.96163	GCATAAATGAGTACTT	AAGTACTCATTTATGC	4.0004	GCAGAAATGAGTAGTA	TACTACTCATTTCTGC	2.5298	GTAAAAATGAGTTATA	TATAACTCATTTTTAC	1.38777	GCGAAAATGAGTTTCA	TGAAACTCATTTTCGC	0.456064	2.45735	1.45427	0.304831	-0.0476362	-0.274359	-1.38652
AAATGATA	TATCATTT	3.99528	ACAAAAATGATAGTCG	CGACTATCATTTTTGT	NA	CGCAAAATGATACATA	TATGTATCATTTTGCG	5.23141	AGTAAAATGATACATC	GATGTATCATTTTACT	5.10049	GCATAAATGATAACTT	AAGTTATCATTTATGC	6.60303	GCAGAAATGATAAGTA	TACTTATCATTTCTGC	NA	GTAAAAATGATATATA	TATATATCATTTTTAC	NA	GCGAAAATGATATTCA	TGAATATCATTTTCGC	0.273021	NA	-0.116154	2.46558	2.12195	NA	NA
AAATGATC	GATCATTT	3.78901	ACAAAAATGATCGTCG	CGACGATCATTTTTGT	NA	CGCAAAATGATCCATA	TATGGATCATTTTGCG	5.76703	AGTAAAATGATCCATC	GATGGATCATTTTACT	2.97731	GCATAAATGATCACTT	AAGTGATCATTTATGC	3.9203	GCAGAAATGATCAGTA	TACTGATCATTTCTGC	NA	GTAAAAATGATCTATA	TATAGATCATTTTTAC	NA	GCGAAAATGATCTTCA	TGAAGATCATTTTCGC	-0.0209051	NA	0.514475	0.320676	-0.114417	NA	NA
AAATGATG	CATCATTT	3.68016	ACAAAAATGATGGTCG	CGACCATCATTTTTGT	5.92983	CGCAAAATGATGCATA	TATGCATCATTTTGCG	5.59386	AGTAAAATGATGCATC	GATGCATCATTTTACT	3.4577	GCATAAATGATGACTT	AAGTCATCATTTATGC	5.42705	GCAGAAATGATGAGTA	TACTCATCATTTCTGC	2.99587	GTAAAAATGATGTATA	TATACATCATTTTTAC	2.56755	GCGAAAATGATGTTCA	TGAACATCATTTTCGC	-0.176017	1.39871	0.310584	0.805978	1.14164	0.15895	-0.16194
AAATGATT	AATCATTT	3.90487	ACAAAAATGATTGTCG	CGACAATCATTTTTGT	NA	CGCAAAATGATTCATA	TATGAATCATTTTGCG	6.43721	AGTAAAATGATTCATC	GATGAATCATTTTACT	3.40501	GCATAAATGATTACTT	AAGTAATCATTTATGC	4.86444	GCAGAAATGATTAGTA	TACTAATCATTTCTGC	2.92005	GTAAAAATGATTTATA	TATAAATCATTTTTAC	1.3167	GCGAAAATGATTTTCA	TGAAAATCATTTTCGC	0.144197	NA	1.30354	0.752746	0.672636	0.0884643	-1.46029
AAATGCAA	TTGCATTT	3.49404	ACAAAAATGCAAGTCG	CGACTTGCATTTTTGT	NA	CGCAAAATGCAACATA	TATGTTGCATTTTGCG	3.13098	AGTAAAATGCAACATC	GATGTTGCATTTTACT	1.80441	GCATAAATGCAAACTT	AAGTTTGCATTTATGC	2.95356	GCAGAAATGCAAAGTA	TACTTTGCATTTCTGC	NA	GTAAAAATGCAATATA	TATATTGCATTTTTAC	NA	GCGAAAATGCAATTCA	TGAATTGCATTTTCGC	-0.441246	NA	-2.58917	-0.864232	-0.920303	NA	NA
AAATGCAC	GTGCATTT	4.79922	ACAAAAATGCACGTCG	CGACGTGCATTTTTGT	NA	CGCAAAATGCACCATA	TATGGTGCATTTTGCG	3.4083	AGTAAAATGCACCATC	GATGGTGCATTTTACT	1.97364	GCATAAATGCACACTT	AAGTGTGCATTTATGC	NA	GCAGAAATGCACAGTA	TACTGTGCATTTCTGC	2.38526	GTAAAAATGCACTATA	TATAGTGCATTTTTAC	NA	GCGAAAATGCACTTCA	TGAAGTGCATTTTCGC	1.41864	NA	-2.26265	-0.693266	NA	-0.40873	NA
AAATGCAG	CTGCATTT	2.27919	ACAAAAATGCAGGTCG	CGACCTGCATTTTTGT	4.32403	CGCAAAATGCAGCATA	TATGCTGCATTTTGCG	4.77958	AGTAAAATGCAGCATC	GATGCTGCATTTTACT	2.29987	GCATAAATGCAGACTT	AAGTCTGCATTTATGC	3.05412	GCAGAAATGCAGAGTA	TACTCTGCATTTCTGC	2.32035	GTAAAAATGCAGTATA	TATACTGCATTTTTAC	NA	GCGAAAATGCAGTTCA	TGAACTGCATTTTCGC	-2.1724	-0.740783	-0.648131	-0.3637	-0.836471	-0.469086	NA
AAATGCAT	ATGCATTT	3.00365	ACAAAAATGCATGTCG	CGACATGCATTTTTGT	3.7042	CGCAAAATGCATCATA	TATGATGCATTTTGCG	4.81744	AGTAAAATGCATCATC	GATGATGCATTTTACT	NA	GCATAAATGCATACTT	AAGTATGCATTTATGC	NA	GCAGAAATGCATAGTA	TACTATGCATTTCTGC	0.723959	GTAAAAATGCATTATA	TATAATGCATTTTTAC	NA	GCGAAAATGCATTTCA	TGAAATGCATTTTCGC	-1.14005	-1.56662	-0.603552	NA	NA	-1.95326	NA
AAATGCCA	TGGCATTT	3.76791	ACAAAAATGCCAGTCG	CGACTGGCATTTTTGT	NA	CGCAAAATGCCACATA	TATGTGGCATTTTGCG	5.50635	AGTAAAATGCCACATC	GATGTGGCATTTTACT	2.16666	GCATAAATGCCAACTT	AAGTTGGCATTTATGC	5.08981	GCAGAAATGCCAAGTA	TACTTGGCATTTCTGC	NA	GTAAAAATGCCATATA	TATATGGCATTTTTAC	NA	GCGAAAATGCCATTCA	TGAATGGCATTTTCGC	-0.0509722	NA	0.207561	-0.498274	0.86051	NA	NA
AAATGCCC	GGGCATTT	3.92479	ACAAAAATGCCCGTCG	CGACGGGCATTTTTGT	NA	CGCAAAATGCCCCATA	TATGGGGCATTTTGCG	5.66634	AGTAAAATGCCCCATC	GATGGGGCATTTTACT	2.68884	GCATAAATGCCCACTT	AAGTGGGCATTTATGC	4.24858	GCAGAAATGCCCAGTA	TACTGGGCATTTCTGC	3.02565	GTAAAAATGCCCTATA	TATAGGGCATTTTTAC	NA	GCGAAAATGCCCTTCA	TGAAGGGCATTTTCGC	0.172576	NA	0.395925	0.0292481	0.15925	0.186637	NA
AAATGCCG	CGGCATTT	4.5864	ACAAAAATGCCGGTCG	CGACCGGCATTTTTGT	4.48089	CGCAAAATGCCGCATA	TATGCGGCATTTTGCG	5.28702	AGTAAAATGCCGCATC	GATGCGGCATTTTACT	3.01894	GCATAAATGCCGACTT	AAGTCGGCATTTATGC	4.35891	GCAGAAATGCCGAGTA	TACTCGGCATTTCTGC	3.96893	GTAAAAATGCCGTATA	TATACGGCATTTTTAC	2.29227	GCGAAAATGCCGTTCA	TGAACGGCATTTTCGC	1.11538	-0.531783	-0.0506765	0.362729	0.25122	1.06362	-0.447673
AAATGCCT	AGGCATTT	3.99861	ACAAAAATGCCTGTCG	CGACAGGCATTTTTGT	5.2965	CGCAAAATGCCTCATA	TATGAGGCATTTTGCG	5.80424	AGTAAAATGCCTCATC	GATGAGGCATTTTACT	2.00819	GCATAAATGCCTACTT	AAGTAGGCATTTATGC	3.19554	GCAGAAATGCCTAGTA	TACTAGGCATTTCTGC	5.37724	GTAAAAATGCCTTATA	TATAAGGCATTTTTAC	2.57237	GCGAAAATGCCTTTCA	TGAAAGGCATTTTCGC	0.277771	0.554888	0.558287	-0.658365	-0.718584	2.37294	-0.156935
AAATGCGA	TCGCATTT	4.10297	ACAAAAATGCGAGTCG	CGACTCGCATTTTTGT	NA	CGCAAAATGCGACATA	TATGTCGCATTTTGCG	5.67986	AGTAAAATGCGACATC	GATGTCGCATTTTACT	2.07425	GCATAAATGCGAACTT	AAGTTCGCATTTATGC	4.58145	GCAGAAATGCGAAGTA	TACTTCGCATTTCTGC	4.69879	GTAAAAATGCGATATA	TATATCGCATTTTTAC	1.88915	GCGAAAATGCGATTCA	TGAATCGCATTTTCGC	0.426484	NA	0.411839	-0.591626	0.436729	1.74217	-0.866103
AAATGCGC	GCGCATTT	3.79741	ACAAAAATGCGCGTCG	CGACGCGCATTTTTGT	5.02977	CGCAAAATGCGCCATA	TATGGCGCATTTTGCG	4.13343	AGTAAAATGCGCCATC	GATGGCGCATTTTACT	2.46609	GCATAAATGCGCACTT	AAGTGCGCATTTATGC	NA	GCAGAAATGCGCAGTA	TACTGCGCATTTCTGC	4.31001	GTAAAAATGCGCTATA	TATAGCGCATTTTTAC	NA	GCGAAAATGCGCTTCA	TGAAGCGCATTTTCGC	-0.00893207	0.199518	-1.4089	-0.195778	NA	1.38072	NA
AAATGCGG	CCGCATTT	4.2677	ACAAAAATGCGGGTCG	CGACCCGCATTTTTGT	5.39886	CGCAAAATGCGGCATA	TATGCCGCATTTTGCG	5.80825	AGTAAAATGCGGCATC	GATGCCGCATTTTACT	2.69054	GCATAAATGCGGACTT	AAGTCCGCATTTATGC	3.18059	GCAGAAATGCGGAGTA	TACTCCGCATTTCTGC	3.5894	GTAAAAATGCGGTATA	TATACCGCATTTTTAC	2.22765	GCGAAAATGCGGTTCA	TGAACCGCATTTTCGC	0.66122	0.691275	0.563008	0.0309709	-0.731045	0.710764	-0.514742
AAATGCGT	ACGCATTT	3.85232	ACAAAAATGCGTGTCG	CGACACGCATTTTTGT	6.60557	CGCAAAATGCGTCATA	TATGACGCATTTTGCG	6.98441	AGTAAAATGCGTCATC	GATGACGCATTTTACT	2.5909	GCATAAATGCGTACTT	AAGTACGCATTTATGC	5.08883	GCAGAAATGCGTAGTA	TACTACGCATTTCTGC	2.53919	GTAAAAATGCGTTATA	TATAACGCATTTTTAC	1.49709	GCGAAAATGCGTTTCA	TGAAACGCATTTTCGC	0.0693125	2.29903	1.94781	-0.0696885	0.859694	-0.265627	-1.27305
AAATGCTA	TAGCATTT	3.26654	ACAAAAATGCTAGTCG	CGACTAGCATTTTTGT	NA	CGCAAAATGCTACATA	TATGTAGCATTTTGCG	5.07678	AGTAAAATGCTACATC	GATGTAGCATTTTACT	2.06908	GCATAAATGCTAACTT	AAGTTAGCATTTATGC	4.05435	GCAGAAATGCTAAGTA	TACTTAGCATTTCTGC	3.58475	GTAAAAATGCTATATA	TATATAGCATTTTTAC	NA	GCGAAAATGCTATTCA	TGAATAGCATTTTCGC	-0.765427	NA	-0.298218	-0.596851	-0.00266359	0.70644	NA
AAATGCTC	GAGCATTT	3.79336	ACAAAAATGCTCGTCG	CGACGAGCATTTTTGT	4.64356	CGCAAAATGCTCCATA	TATGGAGCATTTTGCG	4.80016	AGTAAAATGCTCCATC	GATGGAGCATTTTACT	2.50184	GCATAAATGCTCACTT	AAGTGAGCATTTATGC	4.38268	GCAGAAATGCTCAGTA	TACTGAGCATTTCTGC	2.80145	GTAAAAATGCTCTATA	TATAGAGCATTTTTAC	NA	GCGAAAATGCTCTTCA	TGAAGAGCATTTTCGC	-0.0147133	-0.315058	-0.6239	-0.159665	0.271036	-0.0218042	NA
AAATGCTG	CAGCATTT	3.23272	ACAAAAATGCTGGTCG	CGACCAGCATTTTTGT	5.75909	CGCAAAATGCTGCATA	TATGCAGCATTTTGCG	5.55615	AGTAAAATGCTGCATC	GATGCAGCATTTTACT	2.56127	GCATAAATGCTGACTT	AAGTCAGCATTTATGC	4.92922	GCAGAAATGCTGAGTA	TACTCAGCATTTCTGC	3.95943	GTAAAAATGCTGTATA	TATACAGCATTTTTAC	1.69312	GCGAAAATGCTGTTCA	TGAACAGCATTTTCGC	-0.813622	1.17122	0.266193	-0.0996229	0.726634	1.05478	-1.06958
AAATGCTT	AAGCATTT	3.64209	ACAAAAATGCTTGTCG	CGACAAGCATTTTTGT	4.98506	CGCAAAATGCTTCATA	TATGAAGCATTTTGCG	5.19588	AGTAAAATGCTTCATC	GATGAAGCATTTTACT	2.00818	GCATAAATGCTTACTT	AAGTAAGCATTTATGC	4.18869	GCAGAAATGCTTAGTA	TACTAAGCATTTCTGC	NA	GTAAAAATGCTTTATA	TATAAAGCATTTTTAC	NA	GCGAAAATGCTTTTCA	TGAAAAGCATTTTCGC	-0.230275	0.139938	-0.157988	-0.658372	0.109325	NA	NA
AAATGGAA	TTCCATTT	2.75169	ACAAAAATGGAAGTCG	CGACTTCCATTTTTGT	4.7215	CGCAAAATGGAACATA	TATGTTCCATTTTGCG	5.60035	AGTAAAATGGAACATC	GATGTTCCATTTTACT	2.36277	GCATAAATGGAAACTT	AAGTTTCCATTTATGC	3.45807	GCAGAAATGGAAAGTA	TACTTTCCATTTCTGC	4.25186	GTAAAAATGGAATATA	TATATTCCATTTTTAC	2.73217	GCGAAAATGGAATTCA	TGAATTCCATTTTCGC	-1.49909	-0.211211	0.318229	-0.300158	-0.499739	1.32666	0.00893647
AAATGGAC	GTCCATTT	3.27748	ACAAAAATGGACGTCG	CGACGTCCATTTTTGT	NA	CGCAAAATGGACCATA	TATGGTCCATTTTGCG	4.51075	AGTAAAATGGACCATC	GATGGTCCATTTTACT	2.33793	GCATAAATGGACACTT	AAGTGTCCATTTATGC	NA	GCAGAAATGGACAGTA	TACTGTCCATTTCTGC	3.86693	GTAAAAATGGACTATA	TATAGTCCATTTTTAC	1.79701	GCGAAAATGGACTTCA	TGAAGTCCATTTTCGC	-0.749835	NA	-0.964654	-0.325246	NA	0.968787	-0.961742
AAATGGAG	CTCCATTT	2.41288	ACAAAAATGGAGGTCG	CGACCTCCATTTTTGT	3.17292	CGCAAAATGGAGCATA	TATGCTCCATTTTGCG	4.72387	AGTAAAATGGAGCATC	GATGCTCCATTTTACT	2.372	GCATAAATGGAGACTT	AAGTCTCCATTTATGC	3.99198	GCAGAAATGGAGAGTA	TACTCTCCATTTCTGC	3.01141	GTAAAAATGGAGTATA	TATACTCCATTTTTAC	NA	GCGAAAATGGAGTTCA	TGAACTCCATTTTCGC	-1.98189	-2.27446	-0.713721	-0.290831	-0.0546618	0.173401	NA
AAATGGAT	ATCCATTT	3.61491	ACAAAAATGGATGTCG	CGACATCCATTTTTGT	3.59416	CGCAAAATGGATCATA	TATGATCCATTTTGCG	4.76931	AGTAAAATGGATCATC	GATGATCCATTTTACT	2.00834	GCATAAATGGATACTT	AAGTATCCATTTATGC	4.60422	GCAGAAATGGATAGTA	TACTATCCATTTCTGC	3.20816	GTAAAAATGGATTATA	TATAATCCATTTTTAC	2.04889	GCGAAAATGGATTTCA	TGAAATCCATTTTCGC	-0.268998	-1.71322	-0.660228	-0.658208	0.455715	0.356318	-0.700299
AAATGGCA	TGCCATTT	2.6723	ACAAAAATGGCAGTCG	CGACTGCCATTTTTGT	4.99204	CGCAAAATGGCACATA	TATGTGCCATTTTGCG	5.19064	AGTAAAATGGCACATC	GATGTGCCATTTTACT	2.3008	GCATAAATGGCAACTT	AAGTTGCCATTTATGC	3.61022	GCAGAAATGGCAAGTA	TACTTGCCATTTCTGC	3.57772	GTAAAAATGGCATATA	TATATGCCATTTTTAC	NA	GCGAAAATGGCATTCA	TGAATGCCATTTTCGC	-1.61221	0.149244	-0.164153	-0.362763	-0.372903	0.699908	NA
AAATGGCC	GGCCATTT	2.69633	ACAAAAATGGCCGTCG	CGACGGCCATTTTTGT	3.4899	CGCAAAATGGCCCATA	TATGGGCCATTTTGCG	5.56991	AGTAAAATGGCCCATC	GATGGGCCATTTTACT	1.65582	GCATAAATGGCCACTT	AAGTGGCCATTTATGC	NA	GCAGAAATGGCCAGTA	TACTGGCCATTTCTGC	2.30467	GTAAAAATGGCCTATA	TATAGGCCATTTTTAC	2.97685	GCGAAAATGGCCTTCA	TGAAGGCCATTTTCGC	-1.57798	-1.85214	0.282396	-1.01435	NA	-0.483661	0.262905
AAATGGCG	CGCCATTT	1.34958	ACAAAAATGGCGGTCG	CGACCGCCATTTTTGT	3.98467	CGCAAAATGGCGCATA	TATGCGCCATTTTGCG	4.48897	AGTAAAATGGCGCATC	GATGCGCCATTTTACT	2.02472	GCATAAATGGCGACTT	AAGTCGCCATTTATGC	4.69834	GCAGAAATGGCGAGTA	TACTCGCCATTTCTGC	4.52316	GTAAAAATGGCGTATA	TATACGCCATTTTTAC	2.19405	GCGAAAATGGCGTTCA	TGAACGCCATTTTCGC	-3.49709	-1.19293	-0.990294	-0.641664	0.534171	1.57888	-0.549626
AAATGGCT	AGCCATTT	2.56351	ACAAAAATGGCTGTCG	CGACAGCCATTTTTGT	3.51688	CGCAAAATGGCTCATA	TATGAGCCATTTTGCG	5.64093	AGTAAAATGGCTCATC	GATGAGCCATTTTACT	1.56264	GCATAAATGGCTACTT	AAGTAGCCATTTATGC	3.14765	GCAGAAATGGCTAGTA	TACTAGCCATTTCTGC	3.0651	GTAAAAATGGCTTATA	TATAAGCCATTTTTAC	NA	GCGAAAATGGCTTTCA	TGAAAGCCATTTTCGC	-1.76725	-1.81619	0.366013	-1.10848	-0.758501	0.223318	NA
AAATGGGA	TCCCATTT	2.53014	ACAAAAATGGGAGTCG	CGACTCCCATTTTTGT	NA	CGCAAAATGGGACATA	TATGTCCCATTTTGCG	5.03197	AGTAAAATGGGACATC	GATGTCCCATTTTACT	1.64754	GCATAAATGGGAACTT	AAGTTCCCATTTATGC	5.45163	GCAGAAATGGGAAGTA	TACTTCCCATTTCTGC	2.61235	GTAAAAATGGGATATA	TATATCCCATTTTTAC	3.07973	GCGAAAATGGGATTCA	TGAATCCCATTTTCGC	-1.8148	NA	-0.350972	-1.02271	1.16213	-0.19761	0.369697
AAATGGGC	GCCCATTT	3.12982	ACAAAAATGGGCGTCG	CGACGCCCATTTTTGT	4.62644	CGCAAAATGGGCCATA	TATGGCCCATTTTGCG	5.15906	AGTAAAATGGGCCATC	GATGGCCCATTTTACT	3.29139	GCATAAATGGGCACTT	AAGTGCCCATTTATGC	4.36589	GCAGAAATGGGCAGTA	TACTGCCCATTTCTGC	2.51961	GTAAAAATGGGCTATA	TATAGCCCATTTTTAC	NA	GCGAAAATGGGCTTCA	TGAAGCCCATTTTCGC	-0.96025	-0.337866	-0.201343	0.63797	0.25704	-0.283826	NA
AAATGGGG	CCCCATTT	3.03684	ACAAAAATGGGGGTCG	CGACCCCCATTTTTGT	5.31299	CGCAAAATGGGGCATA	TATGCCCCATTTTGCG	5.04772	AGTAAAATGGGGCATC	GATGCCCCATTTTACT	2.30701	GCATAAATGGGGACTT	AAGTCCCCATTTATGC	3.19806	GCAGAAATGGGGAGTA	TACTCCCCATTTCTGC	2.91262	GTAAAAATGGGGTATA	TATACCCCATTTTTAC	2.44362	GCGAAAATGGGGTTCA	TGAACCCCATTTTCGC	-1.09275	0.576861	-0.33243	-0.35649	-0.716485	0.0815604	-0.290575
AAATGGGT	ACCCATTT	3.21076	ACAAAAATGGGTGTCG	CGACACCCATTTTTGT	4.88519	CGCAAAATGGGTCATA	TATGACCCATTTTGCG	4.92928	AGTAAAATGGGTCATC	GATGACCCATTTTACT	1.5103	GCATAAATGGGTACTT	AAGTACCCATTTATGC	2.89255	GCAGAAATGGGTAGTA	TACTACCCATTTCTGC	2.13602	GTAAAAATGGGTTATA	TATAACCCATTTTTAC	2.66969	GCGAAAATGGGTTTCA	TGAAACCCATTTTCGC	-0.844908	0.00688123	-0.471873	-1.16135	-0.971164	-0.640458	-0.0559217
AAATGGTA	TACCATTT	3.16002	ACAAAAATGGTAGTCG	CGACTACCATTTTTGT	NA	CGCAAAATGGTACATA	TATGTACCATTTTGCG	5.45002	AGTAAAATGGTACATC	GATGTACCATTTTACT	0.829925	GCATAAATGGTAACTT	AAGTTACCATTTATGC	1.61107	GCAGAAATGGTAAGTA	TACTTACCATTTCTGC	3.23321	GTAAAAATGGTATATA	TATATACCATTTTTAC	2.44352	GCGAAAATGGTATTCA	TGAATACCATTTTCGC	-0.917222	NA	0.141234	-1.84869	-2.03942	0.379608	-0.290674
AAATGGTC	GACCATTT	2.78705	ACAAAAATGGTCGTCG	CGACGACCATTTTTGT	4.10444	CGCAAAATGGTCCATA	TATGGACCATTTTGCG	4.82721	AGTAAAATGGTCCATC	GATGGACCATTTTACT	1.81745	GCATAAATGGTCACTT	AAGTGACCATTTATGC	3.89449	GCAGAAATGGTCAGTA	TACTGACCATTTCTGC	2.7187	GTAAAAATGGTCTATA	TATAGACCATTTTTAC	2.31539	GCGAAAATGGTCTTCA	TGAAGACCATTTTCGC	-1.4487	-1.03336	-0.592053	-0.851054	-0.135926	-0.0987292	-0.423673
AAATGGTG	CACCATTT	2.61111	ACAAAAATGGTGGTCG	CGACCACCATTTTTGT	4.63683	CGCAAAATGGTGCATA	TATGCACCATTTTGCG	5.29661	AGTAAAATGGTGCATC	GATGCACCATTTTACT	2.74547	GCATAAATGGTGACTT	AAGTCACCATTTATGC	4.90832	GCAGAAATGGTGAGTA	TACTCACCATTTCTGC	3.19781	GTAAAAATGGTGTATA	TATACACCATTTTTAC	1.69552	GCGAAAATGGTGTTCA	TGAACACCATTTTCGC	-1.69941	-0.324025	-0.0393869	0.0864615	0.709217	0.346699	-1.06709
AAATGGTT	AACCATTT	3.5281	ACAAAAATGGTTGTCG	CGACAACCATTTTTGT	5.09017	CGCAAAATGGTTCATA	TATGAACCATTTTGCG	5.34807	AGTAAAATGGTTCATC	GATGAACCATTTTACT	0.658099	GCATAAATGGTTACTT	AAGTAACCATTTATGC	2.76419	GCAGAAATGGTTAGTA	TACTAACCATTTCTGC	2.96762	GTAAAAATGGTTTATA	TATAAACCATTTTTAC	1.76749	GCGAAAATGGTTTTCA	TGAAAACCATTTTCGC	-0.39271	0.279993	0.0212002	-2.02227	-1.07816	0.132688	-0.992381
AAATGTAA	TTACATTT	3.94323	ACAAAAATGTAAGTCG	CGACTTACATTTTTGT	NA	CGCAAAATGTAACATA	TATGTTACATTTTGCG	4.98397	AGTAAAATGTAACATC	GATGTTACATTTTACT	1.36136	GCATAAATGTAAACTT	AAGTTTACATTTATGC	NA	GCAGAAATGTAAAGTA	TACTTTACATTTCTGC	NA	GTAAAAATGTAATATA	TATATTACATTTTTAC	NA	GCGAAAATGTAATTCA	TGAATTACATTTTCGC	0.19885	NA	-0.407489	-1.31181	NA	NA	NA
AAATGTAC	GTACATTT	3.3963	ACAAAAATGTACGTCG	CGACGTACATTTTTGT	NA	CGCAAAATGTACCATA	TATGGTACATTTTGCG	5.28179	AGTAAAATGTACCATC	GATGGTACATTTTACT	2.26108	GCATAAATGTACACTT	AAGTGTACATTTATGC	NA	GCAGAAATGTACAGTA	TACTGTACATTTCTGC	4.16607	GTAAAAATGTACTATA	TATAGTACATTTTTAC	NA	GCGAAAATGTACTTCA	TGAAGTACATTTTCGC	-0.580522	NA	-0.0568347	-0.402889	NA	1.2469	NA
AAATGTAG	CTACATTT	3.11988	ACAAAAATGTAGGTCG	CGACCTACATTTTTGT	4.06785	CGCAAAATGTAGCATA	TATGCTACATTTTGCG	5.31601	AGTAAAATGTAGCATC	GATGCTACATTTTACT	2.16372	GCATAAATGTAGACTT	AAGTCTACATTTATGC	NA	GCAGAAATGTAGAGTA	TACTCTACATTTCTGC	3.5288	GTAAAAATGTAGTATA	TATACTACATTTTTAC	1.18017	GCGAAAATGTAGTTCA	TGAACTACATTTTCGC	-0.974415	-1.0821	-0.0165464	-0.501241	NA	0.654421	-1.60201
AAATGTAT	ATACATTT	3.503	ACAAAAATGTATGTCG	CGACATACATTTTTGT	5.14601	CGCAAAATGTATCATA	TATGATACATTTTGCG	5.5299	AGTAAAATGTATCATC	GATGATACATTTTACT	2.83423	GCATAAATGTATACTT	AAGTATACATTTATGC	4.8167	GCAGAAATGTATAGTA	TACTATACATTTCTGC	3.82142	GTAAAAATGTATTATA	TATAATACATTTTTAC	1.64999	GCGAAAATGTATTTCA	TGAAATACATTTTCGC	-0.428468	0.354382	0.235281	0.176128	0.632842	0.926473	-1.11435
AAATGTCA	TGACATTT	3.6801	ACAAAAATGTCAGTCG	CGACTGACATTTTTGT	NA	CGCAAAATGTCACATA	TATGTGACATTTTGCG	5.29535	AGTAAAATGTCACATC	GATGTGACATTTTACT	1.97527	GCATAAATGTCAACTT	AAGTTGACATTTATGC	3.91914	GCAGAAATGTCAAGTA	TACTTGACATTTCTGC	4.11576	GTAAAAATGTCATATA	TATATGACATTTTTAC	NA	GCGAAAATGTCATTCA	TGAATGACATTTTCGC	-0.176111	NA	-0.0408674	-0.691621	-0.115376	1.20012	NA
AAATGTCC	GGACATTT	2.67121	ACAAAAATGTCCGTCG	CGACGGACATTTTTGT	NA	CGCAAAATGTCCCATA	TATGGGACATTTTGCG	5.73526	AGTAAAATGTCCCATC	GATGGGACATTTTACT	2.69566	GCATAAATGTCCACTT	AAGTGGACATTTATGC	NA	GCAGAAATGTCCAGTA	TACTGGACATTTCTGC	1.76367	GTAAAAATGTCCTATA	TATAGGACATTTTTAC	NA	GCGAAAATGTCCTTCA	TGAAGGACATTTTCGC	-1.61377	NA	0.47707	0.0361449	NA	-0.986635	NA
AAATGTCG	CGACATTT	4.19494	ACAAAAATGTCGGTCG	CGACCGACATTTTTGT	4.77755	CGCAAAATGTCGCATA	TATGCGACATTTTGCG	5.27692	AGTAAAATGTCGCATC	GATGCGACATTTTACT	2.15816	GCATAAATGTCGACTT	AAGTCGACATTTATGC	4.54049	GCAGAAATGTCGAGTA	TACTCGACATTTCTGC	4.10162	GTAAAAATGTCGTATA	TATACGACATTTTTAC	NA	GCGAAAATGTCGTTCA	TGAACGACATTTTCGC	0.557537	-0.13653	-0.0625694	-0.506858	0.402587	1.18698	NA
AAATGTCT	AGACATTT	4.12172	ACAAAAATGTCTGTCG	CGACAGACATTTTTGT	NA	CGCAAAATGTCTCATA	TATGAGACATTTTGCG	5.80965	AGTAAAATGTCTCATC	GATGAGACATTTTACT	1.82623	GCATAAATGTCTACTT	AAGTAGACATTTATGC	3.5223	GCAGAAATGTCTAGTA	TACTAGACATTTCTGC	2.95956	GTAAAAATGTCTTATA	TATAAGACATTTTTAC	NA	GCGAAAATGTCTTTCA	TGAAAGACATTTTCGC	0.453197	NA	0.564655	-0.842182	-0.446188	0.125199	NA
AAATGTGA	TCACATTT	4.25753	ACAAAAATGTGAGTCG	CGACTCACATTTTTGT	5.26645	CGCAAAATGTGACATA	TATGTCACATTTTGCG	5.91159	AGTAAAATGTGACATC	GATGTCACATTTTACT	2.23455	GCATAAATGTGAACTT	AAGTTCACATTTATGC	2.93953	GCAGAAATGTGAAGTA	TACTTCACATTTCTGC	4.32019	GTAAAAATGTGATATA	TATATCACATTTTTAC	2.99155	GCGAAAATGTGATTCA	TGAATCACATTTTCGC	0.64673	0.514853	0.684683	-0.429689	-0.931995	1.39018	0.278167
AAATGTGC	GCACATTT	4.67902	ACAAAAATGTGCGTCG	CGACGCACATTTTTGT	NA	CGCAAAATGTGCCATA	TATGGCACATTTTGCG	5.61004	AGTAAAATGTGCCATC	GATGGCACATTTTACT	2.71754	GCATAAATGTGCACTT	AAGTGCACATTTATGC	NA	GCAGAAATGTGCAGTA	TACTGCACATTTCTGC	4.44301	GTAAAAATGTGCTATA	TATAGCACATTTTTAC	3.34625	GCGAAAATGTGCTTCA	TGAAGCACATTTTCGC	1.24735	NA	0.329644	0.0582469	NA	1.50438	0.64633
AAATGTGG	CCACATTT	4.51408	ACAAAAATGTGGGTCG	CGACCCACATTTTTGT	5.15647	CGCAAAATGTGGCATA	TATGCCACATTTTGCG	5.77024	AGTAAAATGTGGCATC	GATGCCACATTTTACT	3.69836	GCATAAATGTGGACTT	AAGTCCACATTTATGC	2.73607	GCAGAAATGTGGAGTA	TACTCCACATTTCTGC	4.11425	GTAAAAATGTGGTATA	TATACCACATTTTTAC	3.08733	GCGAAAATGTGGTTCA	TGAACCACATTTTCGC	1.01232	0.368328	0.518254	1.0491	-1.10161	1.19872	0.377581
AAATGTGT	ACACATTT	4.46986	ACAAAAATGTGTGTCG	CGACACACATTTTTGT	5.86887	CGCAAAATGTGTCATA	TATGACACATTTTGCG	6.32093	AGTAAAATGTGTCATC	GATGACACATTTTACT	2.68159	GCATAAATGTGTACTT	AAGTACACATTTATGC	4.82509	GCAGAAATGTGTAGTA	TACTACACATTTCTGC	3.92949	GTAAAAATGTGTTATA	TATAACACATTTTTAC	3.58791	GCGAAAATGTGTTTCA	TGAAACACATTTTCGC	0.949308	1.3175	1.16663	0.0219313	0.639835	1.02695	0.897169
AAATGTTA	TAACATTT	3.2861	ACAAAAATGTTAGTCG	CGACTAACATTTTTGT	NA	CGCAAAATGTTACATA	TATGTAACATTTTGCG	4.99784	AGTAAAATGTTACATC	GATGTAACATTTTACT	1.26694	GCATAAATGTTAACTT	AAGTTAACATTTATGC	3.35613	GCAGAAATGTTAAGTA	TACTTAACATTTCTGC	2.64692	GTAAAAATGTTATATA	TATATAACATTTTTAC	2.50817	GCGAAAATGTTATTCA	TGAATAACATTTTCGC	-0.73755	NA	-0.391152	-1.4072	-0.584716	-0.165467	-0.223569
AAATGTTC	GAACATTT	4.40237	ACAAAAATGTTCGTCG	CGACGAACATTTTTGT	5.61574	CGCAAAATGTTCCATA	TATGGAACATTTTGCG	5.1947	AGTAAAATGTTCCATC	GATGGAACATTTTACT	2.29487	GCATAAATGTTCACTT	AAGTGAACATTTATGC	NA	GCAGAAATGTTCAGTA	TACTGAACATTTCTGC	3.78018	GTAAAAATGTTCTATA	TATAGAACATTTTTAC	2.1344	GCGAAAATGTTCTTCA	TGAAGAACATTTTCGC	0.853127	0.980239	-0.15937	-0.368755	NA	0.888134	-0.611543
AAATGTTG	CAACATTT	3.96278	ACAAAAATGTTGGTCG	CGACCAACATTTTTGT	4.60428	CGCAAAATGTTGCATA	TATGCAACATTTTGCG	5.00929	AGTAAAATGTTGCATC	GATGCAACATTTTACT	3.16813	GCATAAATGTTGACTT	AAGTCAACATTTATGC	4.42202	GCAGAAATGTTGAGTA	TACTCAACATTTCTGC	3.99233	GTAAAAATGTTGTATA	TATACAACATTTTTAC	2.04205	GCGAAAATGTTGTTCA	TGAACAACATTTTCGC	0.226712	-0.367386	-0.377671	0.513451	0.303828	1.08537	-0.707392
AAATGTTT	AAACATTT	3.4027	ACAAAAATGTTTGTCG	CGACAAACATTTTTGT	NA	CGCAAAATGTTTCATA	TATGAAACATTTTGCG	4.88307	AGTAAAATGTTTCATC	GATGAAACATTTTACT	2.57928	GCATAAATGTTTACTT	AAGTAAACATTTATGC	4.26057	GCAGAAATGTTTAGTA	TACTAAACATTTCTGC	3.89837	GTAAAAATGTTTTATA	TATAAAACATTTTTAC	2.34241	GCGAAAATGTTTTTCA	TGAAAAACATTTTCGC	-0.571397	NA	-0.526282	-0.0814288	0.169241	0.998016	-0.395629
AAATTAAA	TTTAATTT	4.6755	ACAAAAATTAAAGTCG	CGACTTTAATTTTTGT	NA	CGCAAAATTAAACATA	TATGTTTAATTTTGCG	5.16577	AGTAAAATTAAACATC	GATGTTTAATTTTACT	1.93575	GCATAAATTAAAACTT	AAGTTTTAATTTATGC	2.53263	GCAGAAATTAAAAGTA	TACTTTTAATTTCTGC	NA	GTAAAAATTAAATATA	TATATTTAATTTTTAC	2.3896	GCGAAAATTAAATTCA	TGAATTTAATTTTCGC	1.24233	NA	-0.193435	-0.731543	-1.2712	NA	-0.346643
AAATTAAC	GTTAATTT	3.90635	ACAAAAATTAACGTCG	CGACGTTAATTTTTGT	NA	CGCAAAATTAACCATA	TATGGTTAATTTTGCG	4.52219	AGTAAAATTAACCATC	GATGGTTAATTTTACT	2.72874	GCATAAATTAACACTT	AAGTGTTAATTTATGC	2.06159	GCAGAAATTAACAGTA	TACTGTTAATTTCTGC	1.56368	GTAAAAATTAACTATA	TATAGTTAATTTTTAC	NA	GCGAAAATTAACTTCA	TGAAGTTAATTTTCGC	0.146301	NA	-0.951176	0.0695589	-1.66386	-1.17256	NA
AAATTAAG	CTTAATTT	3.85507	ACAAAAATTAAGGTCG	CGACCTTAATTTTTGT	4.02146	CGCAAAATTAAGCATA	TATGCTTAATTTTGCG	5.47397	AGTAAAATTAAGCATC	GATGCTTAATTTTACT	NA	GCATAAATTAAGACTT	AAGTCTTAATTTATGC	1.87749	GCAGAAATTAAGAGTA	TACTCTTAATTTCTGC	NA	GTAAAAATTAAGTATA	TATACTTAATTTTTAC	NA	GCGAAAATTAAGTTCA	TGAACTTAATTTTCGC	0.0732289	-1.14391	0.169436	NA	-1.81733	NA	NA
AAATTAAT	ATTAATTT	3.80317	ACAAAAATTAATGTCG	CGACATTAATTTTTGT	5.17288	CGCAAAATTAATCATA	TATGATTAATTTTGCG	4.79361	AGTAAAATTAATCATC	GATGATTAATTTTACT	NA	GCATAAATTAATACTT	AAGTATTAATTTATGC	2.26449	GCAGAAATTAATAGTA	TACTATTAATTTCTGC	2.16794	GTAAAAATTAATTATA	TATAATTAATTTTTAC	NA	GCGAAAATTAATTTCA	TGAAATTAATTTTCGC	-0.000733675	0.390183	-0.631615	NA	-1.49472	-0.610783	NA
AAATTACA	TGTAATTT	3.78385	ACAAAAATTACAGTCG	CGACTGTAATTTTTGT	NA	CGCAAAATTACACATA	TATGTGTAATTTTGCG	5.41618	AGTAAAATTACACATC	GATGTGTAATTTTACT	NA	GCATAAATTACAACTT	AAGTTGTAATTTATGC	NA	GCAGAAATTACAAGTA	TACTTGTAATTTCTGC	NA	GTAAAAATTACATATA	TATATGTAATTTTTAC	1.76439	GCGAAAATTACATTCA	TGAATGTAATTTTCGC	-0.0282653	NA	0.101386	NA	NA	NA	-0.995597
AAATTACC	GGTAATTT	2.93322	ACAAAAATTACCGTCG	CGACGGTAATTTTTGT	NA	CGCAAAATTACCCATA	TATGGGTAATTTTGCG	5.58741	AGTAAAATTACCCATC	GATGGGTAATTTTACT	2.43321	GCATAAATTACCACTT	AAGTGGTAATTTATGC	3.5363	GCAGAAATTACCAGTA	TACTGGTAATTTCTGC	NA	GTAAAAATTACCTATA	TATAGGTAATTTTTAC	NA	GCGAAAATTACCTTCA	TGAAGGTAATTTTCGC	-1.24041	NA	0.302998	-0.228991	-0.434525	NA	NA
AAATTACG	CGTAATTT	4.28958	ACAAAAATTACGGTCG	CGACCGTAATTTTTGT	4.77543	CGCAAAATTACGCATA	TATGCGTAATTTTGCG	5.41438	AGTAAAATTACGCATC	GATGCGTAATTTTACT	2.46512	GCATAAATTACGACTT	AAGTCGTAATTTATGC	3.2641	GCAGAAATTACGAGTA	TACTCGTAATTTCTGC	2.32723	GTAAAAATTACGTATA	TATACGTAATTTTTAC	1.05172	GCGAAAATTACGTTCA	TGAACGTAATTTTCGC	0.692397	-0.139362	0.0992762	-0.196755	-0.661428	-0.462685	-1.73534
AAATTACT	AGTAATTT	4.48036	ACAAAAATTACTGTCG	CGACAGTAATTTTTGT	6.54065	CGCAAAATTACTCATA	TATGAGTAATTTTGCG	6.36455	AGTAAAATTACTCATC	GATGAGTAATTTTACT	1.73334	GCATAAATTACTACTT	AAGTAGTAATTTATGC	3.45073	GCAGAAATTACTAGTA	TACTAGTAATTTCTGC	1.71707	GTAAAAATTACTTATA	TATAAGTAATTTTTAC	2.06997	GCGAAAATTACTTTCA	TGAAAGTAATTTTCGC	0.964268	2.21254	1.21798	-0.936024	-0.505854	-1.02996	-0.678416
AAATTAGA	TCTAATTT	3.38027	ACAAAAATTAGAGTCG	CGACTCTAATTTTTGT	NA	CGCAAAATTAGACATA	TATGTCTAATTTTGCG	5.29334	AGTAAAATTAGACATC	GATGTCTAATTTTACT	1.66423	GCATAAATTAGAACTT	AAGTTCTAATTTATGC	3.86234	GCAGAAATTAGAAGTA	TACTTCTAATTTCTGC	3.78836	GTAAAAATTAGATATA	TATATCTAATTTTTAC	1.58331	GCGAAAATTAGATTCA	TGAATCTAATTTTCGC	-0.603366	NA	-0.0432349	-1.00584	-0.162731	0.895742	-1.18355
AAATTAGC	GCTAATTT	4.26823	ACAAAAATTAGCGTCG	CGACGCTAATTTTTGT	NA	CGCAAAATTAGCCATA	TATGGCTAATTTTGCG	4.63175	AGTAAAATTAGCCATC	GATGGCTAATTTTACT	2.54968	GCATAAATTAGCACTT	AAGTGCTAATTTATGC	2.80765	GCAGAAATTAGCAGTA	TACTGCTAATTTCTGC	2.48144	GTAAAAATTAGCTATA	TATAGCTAATTTTTAC	1.98724	GCGAAAATTAGCTTCA	TGAAGCTAATTTTCGC	0.661973	NA	-0.822182	-0.111333	-1.04193	-0.319318	-0.764283
AAATTAGG	CCTAATTT	3.37159	ACAAAAATTAGGGTCG	CGACCCTAATTTTTGT	4.20208	CGCAAAATTAGGCATA	TATGCCTAATTTTGCG	5.2953	AGTAAAATTAGGCATC	GATGCCTAATTTTACT	NA	GCATAAATTAGGACTT	AAGTCCTAATTTATGC	1.76896	GCAGAAATTAGGAGTA	TACTCCTAATTTCTGC	2.37673	GTAAAAATTAGGTATA	TATACCTAATTTTTAC	1.89004	GCGAAAATTAGGTTCA	TGAACCTAATTTTCGC	-0.615731	-0.90326	-0.0409274	NA	-1.9078	-0.416669	-0.865183
AAATTAGT	ACTAATTT	4.00032	ACAAAAATTAGTGTCG	CGACACTAATTTTTGT	7.08623	CGCAAAATTAGTCATA	TATGACTAATTTTGCG	6.84344	AGTAAAATTAGTCATC	GATGACTAATTTTACT	NA	GCATAAATTAGTACTT	AAGTACTAATTTATGC	3.19273	GCAGAAATTAGTAGTA	TACTACTAATTTCTGC	2.00134	GTAAAAATTAGTTATA	TATAACTAATTTTTAC	0.950295	GCGAAAATTAGTTTCA	TGAAACTAATTTTCGC	0.280213	2.93945	1.78182	NA	-0.720926	-0.765669	-1.84061
AAATTATA	TATAATTT	2.98741	ACAAAAATTATAGTCG	CGACTATAATTTTTGT	NA	CGCAAAATTATACATA	TATGTATAATTTTGCG	5.56924	AGTAAAATTATACATC	GATGTATAATTTTACT	NA	GCATAAATTATAACTT	AAGTTATAATTTATGC	2.35633	GCAGAAATTATAAGTA	TACTTATAATTTCTGC	NA	GTAAAAATTATATATA	TATATATAATTTTTAC	3.31872	GCGAAAATTATATTCA	TGAATATAATTTTCGC	-1.16318	NA	0.281599	NA	-1.41816	NA	0.617763
AAATTATC	GATAATTT	4.84083	ACAAAAATTATCGTCG	CGACGATAATTTTTGT	NA	CGCAAAATTATCCATA	TATGGATAATTTTGCG	5.35122	AGTAAAATTATCCATC	GATGGATAATTTTACT	4.28202	GCATAAATTATCACTT	AAGTGATAATTTATGC	6.27983	GCAGAAATTATCAGTA	TACTGATAATTTCTGC	3.71689	GTAAAAATTATCTATA	TATAGATAATTTTTAC	1.47458	GCGAAAATTATCTTCA	TGAAGATAATTTTCGC	1.47793	NA	0.0249117	1.63874	1.85252	0.829293	-1.29641
AAATTATG	CATAATTT	3.48484	ACAAAAATTATGGTCG	CGACCATAATTTTTGT	4.5387	CGCAAAATTATGCATA	TATGCATAATTTTGCG	5.29236	AGTAAAATTATGCATC	GATGCATAATTTTACT	2.82614	GCATAAATTATGACTT	AAGTCATAATTTATGC	4.58977	GCAGAAATTATGAGTA	TACTCATAATTTCTGC	2.06237	GTAAAAATTATGTATA	TATACATAATTTTTAC	2.43964	GCGAAAATTATGTTCA	TGAACATAATTTTCGC	-0.454353	-0.454761	-0.0443915	0.167959	0.443666	-0.708925	-0.294701
AAATTATT	AATAATTT	4.35849	ACAAAAATTATTGTCG	CGACAATAATTTTTGT	5.0966	CGCAAAATTATTCATA	TATGAATAATTTTGCG	5.92258	AGTAAAATTATTCATC	GATGAATAATTTTACT	2.45259	GCATAAATTATTACTT	AAGTAATAATTTATGC	2.61752	GCAGAAATTATTAGTA	TACTAATAATTTCTGC	2.66011	GTAAAAATTATTTATA	TATAAATAATTTTTAC	NA	GCGAAAATTATTTTCA	TGAAAATAATTTTCGC	0.790603	0.288549	0.697618	-0.209421	-1.20043	-0.153208	NA
AAATTCAA	TTGAATTT	4.50931	ACAAAAATTCAAGTCG	CGACTTGAATTTTTGT	NA	CGCAAAATTCAACATA	TATGTTGAATTTTGCG	5.26717	AGTAAAATTCAACATC	GATGTTGAATTTTACT	2.20223	GCATAAATTCAAACTT	AAGTTTGAATTTATGC	4.0401	GCAGAAATTCAAAGTA	TACTTTGAATTTCTGC	1.79701	GTAAAAATTCAATATA	TATATTGAATTTTTAC	NA	GCGAAAATTCAATTCA	TGAATTGAATTTTCGC	1.00552	NA	-0.0740447	-0.462335	-0.0145454	-0.955636	NA
AAATTCAC	GTGAATTT	4.09059	ACAAAAATTCACGTCG	CGACGTGAATTTTTGT	NA	CGCAAAATTCACCATA	TATGGTGAATTTTGCG	4.6408	AGTAAAATTCACCATC	GATGGTGAATTTTACT	2.61638	GCATAAATTCACACTT	AAGTGTGAATTTATGC	NA	GCAGAAATTCACAGTA	TACTGTGAATTTCTGC	4.05382	GTAAAAATTCACTATA	TATAGTGAATTTTTAC	NA	GCGAAAATTCACTTCA	TGAAGTGAATTTTCGC	0.408838	NA	-0.811532	-0.0439456	NA	1.14254	NA
AAATTCAG	CTGAATTT	2.65606	ACAAAAATTCAGGTCG	CGACCTGAATTTTTGT	NA	CGCAAAATTCAGCATA	TATGCTGAATTTTGCG	6.01223	AGTAAAATTCAGCATC	GATGCTGAATTTTACT	2.90375	GCATAAATTCAGACTT	AAGTCTGAATTTATGC	4.5021	GCAGAAATTCAGAGTA	TACTCTGAATTTCTGC	4.1223	GTAAAAATTCAGTATA	TATACTGAATTTTTAC	3.11942	GCGAAAATTCAGTTCA	TGAACTGAATTTTCGC	-1.63535	NA	0.803178	0.246365	0.370582	1.2062	0.410887
AAATTCAT	ATGAATTT	4.40441	ACAAAAATTCATGTCG	CGACATGAATTTTTGT	5.16368	CGCAAAATTCATCATA	TATGATGAATTTTGCG	5.44487	AGTAAAATTCATCATC	GATGATGAATTTTACT	2.88499	GCATAAATTCATACTT	AAGTATGAATTTATGC	3.9525	GCAGAAATTCATAGTA	TACTATGAATTTCTGC	2.83846	GTAAAAATTCATTATA	TATAATGAATTTTTAC	NA	GCGAAAATTCATTTCA	TGAAATGAATTTTCGC	0.856038	0.377929	0.135166	0.227414	-0.0875704	0.0126112	NA
AAATTCCA	TGGAATTT	5.05035	ACAAAAATTCCAGTCG	CGACTGGAATTTTTGT	NA	CGCAAAATTCCACATA	TATGTGGAATTTTGCG	6.01194	AGTAAAATTCCACATC	GATGTGGAATTTTACT	2.40366	GCATAAATTCCAACTT	AAGTTGGAATTTATGC	5.15876	GCAGAAATTCCAAGTA	TACTTGGAATTTCTGC	5.75286	GTAAAAATTCCATATA	TATATGGAATTTTTAC	NA	GCGAAAATTCCATTCA	TGAATGGAATTTTCGC	1.7765	NA	0.802832	-0.258848	0.917983	2.72215	NA
AAATTCCC	GGGAATTT	4.61744	ACAAAAATTCCCGTCG	CGACGGGAATTTTTGT	NA	CGCAAAATTCCCCATA	TATGGGGAATTTTGCG	5.78674	AGTAAAATTCCCCATC	GATGGGGAATTTTACT	2.74939	GCATAAATTCCCACTT	AAGTGGGAATTTATGC	5.23241	GCAGAAATTCCCAGTA	TACTGGGAATTTCTGC	NA	GTAAAAATTCCCTATA	TATAGGGAATTTTTAC	NA	GCGAAAATTCCCTTCA	TGAAGGGAATTTTCGC	1.1596	NA	0.537683	0.090421	0.979378	NA	NA
AAATTCCG	CGGAATTT	4.18261	ACAAAAATTCCGGTCG	CGACCGGAATTTTTGT	NA	CGCAAAATTCCGCATA	TATGCGGAATTTTGCG	6.27735	AGTAAAATTCCGCATC	GATGCGGAATTTTACT	3.24205	GCATAAATTCCGACTT	AAGTCGGAATTTATGC	4.9606	GCAGAAATTCCGAGTA	TACTCGGAATTTCTGC	5.53241	GTAAAAATTCCGTATA	TATACGGAATTTTTAC	2.76829	GCGAAAATTCCGTTCA	TGAACGGAATTTTCGC	0.539969	NA	1.11532	0.588125	0.7528	2.5172	0.0464246
AAATTCCT	AGGAATTT	3.9426	ACAAAAATTCCTGTCG	CGACAGGAATTTTTGT	NA	CGCAAAATTCCTCATA	TATGAGGAATTTTGCG	5.92888	AGTAAAATTCCTCATC	GATGAGGAATTTTACT	2.86838	GCATAAATTCCTACTT	AAGTAGGAATTTATGC	3.81175	GCAGAAATTCCTAGTA	TACTAGGAATTTCTGC	5.47834	GTAAAAATTCCTTATA	TATAAGGAATTTTTAC	NA	GCGAAAATTCCTTTCA	TGAAAGGAATTTTCGC	0.197956	NA	0.705034	0.21063	-0.204899	2.46693	NA
AAATTCGA	TCGAATTT	4.59299	ACAAAAATTCGAGTCG	CGACTCGAATTTTTGT	NA	CGCAAAATTCGACATA	TATGTCGAATTTTGCG	5.06579	AGTAAAATTCGACATC	GATGTCGAATTTTACT	2.947	GCATAAATTCGAACTT	AAGTTCGAATTTATGC	2.0083	GCAGAAATTCGAAGTA	TACTTCGAATTTCTGC	3.56585	GTAAAAATTCGATATA	TATATCGAATTTTTAC	NA	GCGAAAATTCGATTCA	TGAATCGAATTTTCGC	1.12476	NA	-0.311155	0.290058	-1.70829	0.688873	NA
AAATTCGC	GCGAATTT	4.50575	ACAAAAATTCGCGTCG	CGACGCGAATTTTTGT	NA	CGCAAAATTCGCCATA	TATGGCGAATTTTGCG	4.64618	AGTAAAATTCGCCATC	GATGGCGAATTTTACT	1.48344	GCATAAATTCGCACTT	AAGTGCGAATTTATGC	4.12574	GCAGAAATTCGCAGTA	TACTGCGAATTTCTGC	4.22936	GTAAAAATTCGCTATA	TATAGCGAATTTTTAC	NA	GCGAAAATTCGCTTCA	TGAAGCGAATTTTCGC	1.00045	NA	-0.805199	-1.18848	0.056845	1.30574	NA
AAATTCGG	CCGAATTT	3.70908	ACAAAAATTCGGGTCG	CGACCCGAATTTTTGT	5.09991	CGCAAAATTCGGCATA	TATGCCGAATTTTGCG	5.51991	AGTAAAATTCGGCATC	GATGCCGAATTTTACT	3.28001	GCATAAATTCGGACTT	AAGTCCGAATTTATGC	3.3642	GCAGAAATTCGGAGTA	TACTCCGAATTTCTGC	3.32417	GTAAAAATTCGGTATA	TATACCGAATTTTTAC	0.901794	GCGAAAATTCGGTTCA	TGAACCGAATTTTCGC	-0.134813	0.29297	0.223522	0.626474	-0.577987	0.464173	-1.89096
AAATTCGT	ACGAATTT	3.83017	ACAAAAATTCGTGTCG	CGACACGAATTTTTGT	6.12712	CGCAAAATTCGTCATA	TATGACGAATTTTGCG	6.11036	AGTAAAATTCGTCATC	GATGACGAATTTTACT	2.84174	GCATAAATTCGTACTT	AAGTACGAATTTATGC	3.43584	GCAGAAATTCGTAGTA	TACTACGAATTTCTGC	2.18956	GTAAAAATTCGTTATA	TATAACGAATTTTTAC	1.47302	GCGAAAATTCGTTTCA	TGAAACGAATTTTCGC	0.0377492	1.66157	0.918707	0.18372	-0.518266	-0.590674	-1.29804
AAATTCTA	TAGAATTT	3.54551	ACAAAAATTCTAGTCG	CGACTAGAATTTTTGT	NA	CGCAAAATTCTACATA	TATGTAGAATTTTGCG	5.80817	AGTAAAATTCTACATC	GATGTAGAATTTTACT	2.76144	GCATAAATTCTAACTT	AAGTTAGAATTTATGC	4.36337	GCAGAAATTCTAAGTA	TACTTAGAATTTCTGC	3.20407	GTAAAAATTCTATATA	TATATAGAATTTTTAC	NA	GCGAAAATTCTATTCA	TGAATAGAATTTTCGC	-0.367889	NA	0.562915	0.102594	0.254936	0.352517	NA
AAATTCTC	GAGAATTT	4.49959	ACAAAAATTCTCGTCG	CGACGAGAATTTTTGT	4.70698	CGCAAAATTCTCCATA	TATGGAGAATTTTGCG	4.92708	AGTAAAATTCTCCATC	GATGGAGAATTTTACT	2.46258	GCATAAATTCTCACTT	AAGTGAGAATTTATGC	4.67288	GCAGAAATTCTCAGTA	TACTGAGAATTTCTGC	3.4364	GTAAAAATTCTCTATA	TATAGAGAATTTTTAC	NA	GCGAAAATTCTCTTCA	TGAAGAGAATTTTCGC	0.991663	-0.230557	-0.474466	-0.199326	0.512951	0.568522	NA
AAATTCTG	CAGAATTT	3.79064	ACAAAAATTCTGGTCG	CGACCAGAATTTTTGT	5.29959	CGCAAAATTCTGCATA	TATGCAGAATTTTGCG	5.64788	AGTAAAATTCTGCATC	GATGCAGAATTTTACT	3.21348	GCATAAATTCTGACTT	AAGTCAGAATTTATGC	4.90343	GCAGAAATTCTGAGTA	TACTCAGAATTTCTGC	4.13271	GTAAAAATTCTGTATA	TATACAGAATTTTTAC	1.87738	GCGAAAATTCTGTTCA	TGAACAGAATTTTCGC	-0.0185789	0.559011	0.374192	0.559258	0.705135	1.21588	-0.878322
AAATTCTT	AAGAATTT	4.44457	ACAAAAATTCTTGTCG	CGACAAGAATTTTTGT	NA	CGCAAAATTCTTCATA	TATGAAGAATTTTGCG	6.13062	AGTAAAATTCTTCATC	GATGAAGAATTTTACT	3.21317	GCATAAATTCTTACTT	AAGTAAGAATTTATGC	5.02067	GCAGAAATTCTTAGTA	TACTAAGAATTTCTGC	5.46459	GTAAAAATTCTTTATA	TATAAAGAATTTTTAC	2.75132	GCGAAAATTCTTTTCA	TGAAAAGAATTTTCGC	0.913257	NA	0.942559	0.558945	0.80287	2.45414	0.0288073
AAATTGAA	TTCAATTT	3.27053	ACAAAAATTGAAGTCG	CGACTTCAATTTTTGT	NA	CGCAAAATTGAACATA	TATGTTCAATTTTGCG	5.39948	AGTAAAATTGAACATC	GATGTTCAATTTTACT	2.83756	GCATAAATTGAAACTT	AAGTTTCAATTTATGC	2.07942	GCAGAAATTGAAAGTA	TACTTTCAATTTCTGC	2.52308	GTAAAAATTGAATATA	TATATTCAATTTTTAC	NA	GCGAAAATTGAATTCA	TGAATTCAATTTTCGC	-0.759738	NA	0.0817299	0.179492	-1.64899	-0.280604	NA
AAATTGAC	GTCAATTT	3.84607	ACAAAAATTGACGTCG	CGACGTCAATTTTTGT	5.00743	CGCAAAATTGACCATA	TATGGTCAATTTTGCG	5.29793	AGTAAAATTGACCATC	GATGGTCAATTTTACT	2.94473	GCATAAATTGACACTT	AAGTGTCAATTTATGC	2.77182	GCAGAAATTGACAGTA	TACTGTCAATTTCTGC	3.32167	GTAAAAATTGACTATA	TATAGTCAATTTTTAC	NA	GCGAAAATTGACTTCA	TGAAGTCAATTTTCGC	0.0604076	0.169755	-0.0378364	0.287758	-1.0718	0.461855	NA
AAATTGAG	CTCAATTT	3.88436	ACAAAAATTGAGGTCG	CGACCTCAATTTTTGT	5.17688	CGCAAAATTGAGCATA	TATGCTCAATTTTGCG	5.3897	AGTAAAATTGAGCATC	GATGCTCAATTTTACT	3.09471	GCATAAATTGAGACTT	AAGTCTCAATTTATGC	3.36589	GCAGAAATTGAGAGTA	TACTCTCAATTTCTGC	2.59461	GTAAAAATTGAGTATA	TATACTCAATTTTTAC	NA	GCGAAAATTGAGTTCA	TGAACTCAATTTTCGC	0.114966	0.395509	0.0702156	0.439279	-0.576581	-0.214101	NA
AAATTGAT	ATCAATTT	4.1674	ACAAAAATTGATGTCG	CGACATCAATTTTTGT	5.05147	CGCAAAATTGATCATA	TATGATCAATTTTGCG	5.34649	AGTAAAATTGATCATC	GATGATCAATTTTACT	2.91336	GCATAAATTGATACTT	AAGTATCAATTTATGC	3.99513	GCAGAAATTGATAGTA	TACTATCAATTTCTGC	1.83294	GTAAAAATTGATTATA	TATAATCAATTTTTAC	2.30541	GCGAAAATTGATTTCA	TGAAATCAATTTTCGC	0.518297	0.228426	0.0193379	0.256069	-0.0520367	-0.922235	-0.434029
AAATTGCA	TGCAATTT	3.26145	ACAAAAATTGCAGTCG	CGACTGCAATTTTTGT	4.92867	CGCAAAATTGCACATA	TATGTGCAATTTTGCG	5.52332	AGTAAAATTGCACATC	GATGTGCAATTTTACT	1.59613	GCATAAATTGCAACTT	AAGTTGCAATTTATGC	2.5628	GCAGAAATTGCAAGTA	TACTTGCAATTTCTGC	3.64006	GTAAAAATTGCATATA	TATATGCAATTTTTAC	NA	GCGAAAATTGCATTCA	TGAATGCAATTTTCGC	-0.772685	0.0648114	0.227541	-1.07465	-1.24604	0.757866	NA
AAATTGCC	GGCAATTT	4.24601	ACAAAAATTGCCGTCG	CGACGGCAATTTTTGT	NA	CGCAAAATTGCCCATA	TATGGGCAATTTTGCG	5.35383	AGTAAAATTGCCCATC	GATGGGCAATTTTACT	1.5909	GCATAAATTGCCACTT	AAGTGGCAATTTATGC	3.35113	GCAGAAATTGCCAGTA	TACTGGCAATTTCTGC	2.22264	GTAAAAATTGCCTATA	TATAGGCAATTTTTAC	3.48667	GCGAAAATTGCCTTCA	TGAAGGCAATTTTCGC	0.630314	NA	0.0279759	-1.07992	-0.588883	-0.559927	0.79209
AAATTGCG	CGCAATTT	3.5983	ACAAAAATTGCGGTCG	CGACCGCAATTTTTGT	5.47045	CGCAAAATTGCGCATA	TATGCGCAATTTTGCG	5.45336	AGTAAAATTGCGCATC	GATGCGCAATTTTACT	2.67471	GCATAAATTGCGACTT	AAGTCGCAATTTATGC	3.62771	GCAGAAATTGCGAGTA	TACTCGCAATTTCTGC	3.3477	GTAAAAATTGCGTATA	TATACGCAATTTTTAC	2.66294	GCGAAAATTGCGTTCA	TGAACGCAATTTTCGC	-0.292676	0.786661	0.145164	0.014973	-0.358317	0.486054	-0.0629267
AAATTGCT	AGCAATTT	4.60251	ACAAAAATTGCTGTCG	CGACAGCAATTTTTGT	NA	CGCAAAATTGCTCATA	TATGAGCAATTTTGCG	5.50835	AGTAAAATTGCTCATC	GATGAGCAATTTTACT	2.22751	GCATAAATTGCTACTT	AAGTAGCAATTTATGC	3.88567	GCAGAAATTGCTAGTA	TACTAGCAATTTCTGC	2.75761	GTAAAAATTGCTTATA	TATAAGCAATTTTTAC	2.27781	GCGAAAATTGCTTTCA	TGAAAGCAATTTTCGC	1.13833	NA	0.209914	-0.436803	-0.143281	-0.0625587	-0.462684
AAATTGGA	TCCAATTT	3.16211	ACAAAAATTGGAGTCG	CGACTCCAATTTTTGT	5.48209	CGCAAAATTGGACATA	TATGTCCAATTTTGCG	5.30522	AGTAAAATTGGACATC	GATGTCCAATTTTACT	2.20238	GCATAAATTGGAACTT	AAGTTCCAATTTATGC	3.6059	GCAGAAATTGGAAGTA	TACTTCCAATTTCTGC	2.37671	GTAAAAATTGGATATA	TATATCCAATTTTTAC	2.11787	GCGAAAATTGGATTCA	TGAATCCAATTTTCGC	-0.914238	0.802168	-0.0292486	-0.462186	-0.376504	-0.416686	-0.628692
AAATTGGC	GCCAATTT	3.3799	ACAAAAATTGGCGTCG	CGACGCCAATTTTTGT	3.89815	CGCAAAATTGGCCATA	TATGGCCAATTTTGCG	4.99019	AGTAAAATTGGCCATC	GATGGCCAATTTTACT	2.44214	GCATAAATTGGCACTT	AAGTGCCAATTTATGC	0.88268	GCAGAAATTGGCAGTA	TACTGCCAATTTCTGC	1.83439	GTAAAAATTGGCTATA	TATAGCCAATTTTTAC	2.59234	GCGAAAATTGGCTTCA	TGAAGCCAATTTTCGC	-0.603885	-1.3082	-0.400158	-0.219971	-2.64662	-0.920882	-0.136211
AAATTGGG	CCCAATTT	4.43589	ACAAAAATTGGGGTCG	CGACCCCAATTTTTGT	4.17809	CGCAAAATTGGGCATA	TATGCCCAATTTTGCG	5.07095	AGTAAAATTGGGCATC	GATGCCCAATTTTACT	2.63119	GCATAAATTGGGACTT	AAGTCCCAATTTATGC	1.64607	GCAGAAATTGGGAGTA	TACTCCCAATTTCTGC	2.63602	GTAAAAATTGGGTATA	TATACCCAATTTTTAC	2.17316	GCGAAAATTGGGTTCA	TGAACCCAATTTTCGC	0.900901	-0.935223	-0.305082	-0.0289855	-2.01025	-0.1756	-0.571308
AAATTGGT	ACCAATTT	3.63014	ACAAAAATTGGTGTCG	CGACACCAATTTTTGT	5.26657	CGCAAAATTGGTCATA	TATGACCAATTTTGCG	5.03416	AGTAAAATTGGTCATC	GATGACCAATTTTACT	0.427906	GCATAAATTGGTACTT	AAGTACCAATTTATGC	0.453342	GCAGAAATTGGTAGTA	TACTACCAATTTCTGC	1.43145	GTAAAAATTGGTTATA	TATAACCAATTTTTAC	0.824221	GCGAAAATTGGTTTCA	TGAAACCAATTTTCGC	-0.247299	0.515017	-0.348394	-2.25482	-3.00452	-1.2955	-1.97148
AAATTGTA	TACAATTT	3.97332	ACAAAAATTGTAGTCG	CGACTACAATTTTTGT	NA	CGCAAAATTGTACATA	TATGTACAATTTTGCG	5.74194	AGTAAAATTGTACATC	GATGTACAATTTTACT	1.74056	GCATAAATTGTAACTT	AAGTTACAATTTATGC	2.92317	GCAGAAATTGTAAGTA	TACTTACAATTTCTGC	4.19568	GTAAAAATTGTATATA	TATATACAATTTTTAC	3.41839	GCGAAAATTGTATTCA	TGAATACAATTTTCGC	0.241733	NA	0.484932	-0.928729	-0.945633	1.27443	0.721211
AAATTGTC	GACAATTT	4.21494	ACAAAAATTGTCGTCG	CGACGACAATTTTTGT	NA	CGCAAAATTGTCCATA	TATGGACAATTTTGCG	5.52275	AGTAAAATTGTCCATC	GATGGACAATTTTACT	2.66457	GCATAAATTGTCACTT	AAGTGACAATTTATGC	3.26604	GCAGAAATTGTCAGTA	TACTGACAATTTCTGC	2.217	GTAAAAATTGTCTATA	TATAGACAATTTTTAC	2.30682	GCGAAAATTGTCTTCA	TGAAGACAATTTTCGC	0.586039	NA	0.226865	0.00473109	-0.659817	-0.565164	-0.432565
AAATTGTG	CACAATTT	3.72704	ACAAAAATTGTGGTCG	CGACCACAATTTTTGT	4.6224	CGCAAAATTGTGCATA	TATGCACAATTTTGCG	5.05384	AGTAAAATTGTGCATC	GATGCACAATTTTACT	2.10665	GCATAAATTGTGACTT	AAGTCACAATTTATGC	4.22775	GCAGAAATTGTGAGTA	TACTCACAATTTCTGC	3.22785	GTAAAAATTGTGTATA	TATACACAATTTTTAC	3.17798	GCGAAAATTGTGTTCA	TGAACACAATTTTCGC	-0.109209	-0.343249	-0.325225	-0.558899	0.141879	0.374632	0.47168
AAATTGTT	AACAATTT	4.40447	ACAAAAATTGTTGTCG	CGACAACAATTTTTGT	4.9874	CGCAAAATTGTTCATA	TATGAACAATTTTGCG	6.11723	AGTAAAATTGTTCATC	GATGAACAATTTTACT	1.90062	GCATAAATTGTTACTT	AAGTAACAATTTATGC	2.67553	GCAGAAATTGTTAGTA	TACTAACAATTTCTGC	3.86947	GTAAAAATTGTTTATA	TATAAACAATTTTTAC	1.84863	GCGAAAATTGTTTTCA	TGAAAACAATTTTCGC	0.856124	0.14306	0.926794	-0.767032	-1.15207	0.971145	-0.908159
AAATTTAA	TTAAATTT	4.20078	ACAAAAATTTAAGTCG	CGACTTAAATTTTTGT	NA	CGCAAAATTTAACATA	TATGTTAAATTTTGCG	5.39536	AGTAAAATTTAACATC	GATGTTAAATTTTACT	2.67244	GCATAAATTTAAACTT	AAGTTTAAATTTATGC	3.62129	GCAGAAATTTAAAGTA	TACTTTAAATTTCTGC	2.23228	GTAAAAATTTAATATA	TATATTAAATTTTTAC	1.56368	GCGAAAATTTAATTCA	TGAATTAAATTTTCGC	0.565857	NA	0.0768795	0.0126884	-0.363668	-0.550959	-1.20393
AAATTTAC	GTAAATTT	3.88575	ACAAAAATTTACGTCG	CGACGTAAATTTTTGT	NA	CGCAAAATTTACCATA	TATGGTAAATTTTGCG	5.24678	AGTAAAATTTACCATC	GATGGTAAATTTTACT	2.02852	GCATAAATTTACACTT	AAGTGTAAATTTATGC	4.16953	GCAGAAATTTACAGTA	TACTGTAAATTTCTGC	2.43891	GTAAAAATTTACTATA	TATAGTAAATTTTTAC	NA	GCGAAAATTTACTTCA	TGAAGTAAATTTTCGC	0.116952	NA	-0.0980554	-0.637822	0.0933527	-0.358855	NA
AAATTTAG	CTAAATTT	3.37701	ACAAAAATTTAGGTCG	CGACCTAAATTTTTGT	4.33834	CGCAAAATTTAGCATA	TATGCTAAATTTTGCG	5.35054	AGTAAAATTTAGCATC	GATGCTAAATTTTACT	1.75243	GCATAAATTTAGACTT	AAGTCTAAATTTATGC	3.70761	GCAGAAATTTAGAGTA	TACTCTAAATTTCTGC	2.27246	GTAAAAATTTAGTATA	TATACTAAATTTTTAC	1.03516	GCGAAAATTTAGTTCA	TGAACTAAATTTTCGC	-0.608002	-0.72171	0.024108	-0.916743	-0.291718	-0.513606	-1.75252
AAATTTAT	ATAAATTT	4.17046	ACAAAAATTTATGTCG	CGACATAAATTTTTGT	NA	CGCAAAATTTATCATA	TATGATAAATTTTGCG	4.98067	AGTAAAATTTATCATC	GATGATAAATTTTACT	2.14379	GCATAAATTTATACTT	AAGTATAAATTTATGC	3.01354	GCAGAAATTTATAGTA	TACTATAAATTTCTGC	2.72688	GTAAAAATTTATTATA	TATAATAAATTTTTAC	2.38594	GCGAAAATTTATTTCA	TGAAATAAATTTTCGC	0.522654	NA	-0.411376	-0.521375	-0.870297	-0.0911297	-0.350448
AAATTTCA	TGAAATTT	3.84288	ACAAAAATTTCAGTCG	CGACTGAAATTTTTGT	5.32829	CGCAAAATTTCACATA	TATGTGAAATTTTGCG	5.56034	AGTAAAATTTCACATC	GATGTGAAATTTTACT	3.05275	GCATAAATTTCAACTT	AAGTTGAAATTTATGC	3.92134	GCAGAAATTTCAAGTA	TACTTGAAATTTCTGC	3.4889	GTAAAAATTTCATATA	TATATGAAATTTTTAC	NA	GCGAAAATTTCATTCA	TGAATGAAATTTTCGC	0.0558505	0.597254	0.271123	0.396889	-0.113542	0.617325	NA
AAATTTCC	GGAAATTT	4.67896	ACAAAAATTTCCGTCG	CGACGGAAATTTTTGT	NA	CGCAAAATTTCCCATA	TATGGGAAATTTTGCG	5.19267	AGTAAAATTTCCCATC	GATGGGAAATTTTACT	3.38446	GCATAAATTTCCACTT	AAGTGGAAATTTATGC	6.02842	GCAGAAATTTCCAGTA	TACTGGAAATTTCTGC	NA	GTAAAAATTTCCTATA	TATAGGAAATTTTTAC	NA	GCGAAAATTTCCTTCA	TGAAGGAAATTTTCGC	1.24727	NA	-0.161768	0.731994	1.64295	NA	NA
AAATTTCG	CGAAATTT	4.45187	ACAAAAATTTCGGTCG	CGACCGAAATTTTTGT	5.25127	CGCAAAATTTCGCATA	TATGCGAAATTTTGCG	5.35639	AGTAAAATTTCGCATC	GATGCGAAATTTTACT	2.52909	GCATAAATTTCGACTT	AAGTCGAAATTTATGC	3.27964	GCAGAAATTTCGAGTA	TACTCGAAATTTCTGC	3.11667	GTAAAAATTTCGTATA	TATACGAAATTTTTAC	NA	GCGAAAATTTCGTTCA	TGAACGAAATTTTCGC	0.923661	0.494624	0.0309914	-0.13213	-0.648477	0.271262	NA
AAATTTCT	AGAAATTT	4.85542	ACAAAAATTTCTGTCG	CGACAGAAATTTTTGT	NA	CGCAAAATTTCTCATA	TATGAGAAATTTTGCG	5.37777	AGTAAAATTTCTCATC	GATGAGAAATTTTACT	2.76228	GCATAAATTTCTACTT	AAGTAGAAATTTATGC	3.49508	GCAGAAATTTCTAGTA	TACTAGAAATTTCTGC	3.37251	GTAAAAATTTCTTATA	TATAAGAAATTTTTAC	NA	GCGAAAATTTCTTTCA	TGAAAGAAATTTTCGC	1.49872	NA	0.0561647	0.10344	-0.468885	0.509117	NA
AAATTTGA	TCAAATTT	4.18842	ACAAAAATTTGAGTCG	CGACTCAAATTTTTGT	5.2912	CGCAAAATTTGACATA	TATGTCAAATTTTGCG	5.40617	AGTAAAATTTGACATC	GATGTCAAATTTTACT	3.36247	GCATAAATTTGAACTT	AAGTTCAAATTTATGC	3.06751	GCAGAAATTTGAAGTA	TACTTCAAATTTCTGC	3.88395	GTAAAAATTTGATATA	TATATCAAATTTTTAC	1.96902	GCGAAAATTTGATTCA	TGAATCAAATTTTCGC	0.548256	0.547826	0.0896016	0.709779	-0.825308	0.98461	-0.783203
AAATTTGC	GCAAATTT	4.02573	ACAAAAATTTGCGTCG	CGACGCAAATTTTTGT	NA	CGCAAAATTTGCCATA	TATGGCAAATTTTGCG	5.57967	AGTAAAATTTGCCATC	GATGGCAAATTTTACT	2.45657	GCATAAATTTGCACTT	AAGTGCAAATTTATGC	2.71568	GCAGAAATTTGCAGTA	TACTGCAAATTTCTGC	3.77849	GTAAAAATTTGCTATA	TATAGCAAATTTTTAC	3.32187	GCGAAAATTTGCTTCA	TGAAGCAAATTTTCGC	0.316422	NA	0.293884	-0.205399	-1.1186	0.886559	0.621028
AAATTTGG	CCAAATTT	4.19535	ACAAAAATTTGGGTCG	CGACCCAAATTTTTGT	4.98658	CGCAAAATTTGGCATA	TATGCCAAATTTTGCG	5.50586	AGTAAAATTTGGCATC	GATGCCAAATTTTACT	2.67093	GCATAAATTTGGACTT	AAGTCCAAATTTATGC	2.42165	GCAGAAATTTGGAGTA	TACTCCAAATTTCTGC	2.9608	GTAAAAATTTGGTATA	TATACCAAATTTTTAC	1.59779	GCGAAAATTTGGTTCA	TGAACCAAATTTTCGC	0.558121	0.14197	0.206976	0.011157	-1.36371	0.126354	-1.16853
AAATTTGT	ACAAATTT	4.0164	ACAAAAATTTGTGTCG	CGACACAAATTTTTGT	6.24234	CGCAAAATTTGTCATA	TATGACAAATTTTGCG	6.00022	AGTAAAATTTGTCATC	GATGACAAATTTTACT	2.73583	GCATAAATTTGTACTT	AAGTACAAATTTATGC	3.46101	GCAGAAATTTGTAGTA	TACTACAAATTTCTGC	2.78844	GTAAAAATTTGTTATA	TATAACAAATTTTTAC	1.67081	GCGAAAATTTGTTTCA	TGAAACAAATTTTCGC	0.303118	1.81509	0.789031	0.0767213	-0.49728	-0.0338986	-1.09273
AAATTTTA	TAAAATTT	4.02806	ACAAAAATTTTAGTCG	CGACTAAAATTTTTGT	NA	CGCAAAATTTTACATA	TATGTAAAATTTTGCG	5.53959	AGTAAAATTTTACATC	GATGTAAAATTTTACT	2.28732	GCATAAATTTTAACTT	AAGTTAAAATTTATGC	4.0034	GCAGAAATTTTAAGTA	TACTTAAAATTTCTGC	2.6776	GTAAAAATTTTATATA	TATATAAAATTTTTAC	1.70268	GCGAAAATTTTATTCA	TGAATAAAATTTTCGC	0.319738	NA	0.246694	-0.376383	-0.0451422	-0.13694	-1.05966
AAATTTTC	GAAAATTT	4.06018	ACAAAAATTTTCGTCG	CGACGAAAATTTTTGT	NA	CGCAAAATTTTCCATA	TATGGAAAATTTTGCG	4.45183	AGTAAAATTTTCCATC	GATGGAAAATTTTACT	2.65212	GCATAAATTTTCACTT	AAGTGAAAATTTATGC	4.03144	GCAGAAATTTTCAGTA	TACTGAAAATTTCTGC	3.61233	GTAAAAATTTTCTATA	TATAGAAAATTTTTAC	1.16665	GCGAAAATTTTCTTCA	TGAAGAAAATTTTCGC	0.365513	NA	-1.03402	-0.00784887	-0.0217631	0.732081	-1.61605
AAATTTTG	CAAAATTT	3.93373	ACAAAAATTTTGGTCG	CGACCAAAATTTTTGT	4.70728	CGCAAAATTTTGCATA	TATGCAAAATTTTGCG	5.66729	AGTAAAATTTTGCATC	GATGCAAAATTTTACT	2.92565	GCATAAATTTTGACTT	AAGTCAAAATTTATGC	2.4981	GCAGAAATTTTGAGTA	TACTCAAAATTTCTGC	2.71298	GTAAAAATTTTGTATA	TATACAAAATTTTTAC	2.58292	GCGAAAATTTTGTTCA	TGAACAAAATTTTCGC	0.185324	-0.230153	0.39705	0.268486	-1.29998	-0.104049	-0.145984
AAATTTTT	AAAAATTT	4.34687	ACAAAAATTTTTGTCG	CGACAAAAATTTTTGT	4.63494	CGCAAAATTTTTCATA	TATGAAAAATTTTGCG	5.26718	AGTAAAATTTTTCATC	GATGAAAAATTTTACT	2.49536	GCATAAATTTTTACTT	AAGTAAAAATTTATGC	2.52877	GCAGAAATTTTTAGTA	TACTAAAAATTTCTGC	4.69568	GTAAAAATTTTTTATA	TATAAAAAATTTTTAC	2.10515	GCGAAAATTTTTTTCA	TGAAAAAAATTTTCGC	0.774035	-0.326536	-0.0740363	-0.166213	-1.27442	1.73928	-0.641899
AACAAAAA	TTTTTGTT	4.60433	ACAAAACAAAAAGTCG	CGACTTTTTGTTTTGT	NA	CGCAAACAAAAACATA	TATGTTTTTGTTTGCG	NA	AGTAAACAAAAACATC	GATGTTTTTGTTTACT	3.63899	GCATAACAAAAAACTT	AAGTTTTTTGTTATGC	3.8819	GCAGAACAAAAAAGTA	TACTTTTTTGTTCTGC	NA	GTAAAACAAAAATATA	TATATTTTTGTTTTAC	NA	GCGAAACAAAAATTCA	TGAATTTTTGTTTCGC	1.14092	NA	NA	0.989128	-0.146424	NA	NA
AACAAAAC	GTTTTGTT	4.59592	ACAAAACAAAACGTCG	CGACGTTTTGTTTTGT	NA	CGCAAACAAAACCATA	TATGGTTTTGTTTGCG	5.32652	AGTAAACAAAACCATC	GATGGTTTTGTTTACT	2.88493	GCATAACAAAACACTT	AAGTGTTTTGTTATGC	NA	GCAGAACAAAACAGTA	TACTGTTTTGTTCTGC	1.42825	GTAAAACAAAACTATA	TATAGTTTTGTTTTAC	NA	GCGAAACAAAACTTCA	TGAAGTTTTGTTTCGC	1.12893	NA	-0.00417769	0.227349	NA	-1.29848	NA
AACAAAAG	CTTTTGTT	3.51888	ACAAAACAAAAGGTCG	CGACCTTTTGTTTTGT	NA	CGCAAACAAAAGCATA	TATGCTTTTGTTTGCG	5.96656	AGTAAACAAAAGCATC	GATGCTTTTGTTTACT	2.81352	GCATAACAAAAGACTT	AAGTCTTTTGTTATGC	NA	GCAGAACAAAAGAGTA	TACTCTTTTGTTCTGC	NA	GTAAAACAAAAGTATA	TATACTTTTGTTTTAC	NA	GCGAAACAAAAGTTCA	TGAACTTTTGTTTCGC	-0.405841	NA	0.749399	0.15521	NA	NA	NA
AACAAAAT	ATTTTGTT	5.19681	ACAAAACAAAATGTCG	CGACATTTTGTTTTGT	NA	CGCAAACAAAATCATA	TATGATTTTGTTTGCG	5.16328	AGTAAACAAAATCATC	GATGATTTTGTTTACT	4.17608	GCATAACAAAATACTT	AAGTATTTTGTTATGC	2.40621	GCAGAACAAAATAGTA	TACTATTTTGTTCTGC	NA	GTAAAACAAAATTATA	TATAATTTTGTTTTAC	2.69512	GCGAAACAAAATTTCA	TGAAATTTTGTTTCGC	1.9852	NA	-0.196367	1.53171	-1.37658	NA	-0.0295249
AACAAACA	TGTTTGTT	4.51385	ACAAAACAAACAGTCG	CGACTGTTTGTTTTGT	NA	CGCAAACAAACACATA	TATGTGTTTGTTTGCG	5.69883	AGTAAACAAACACATC	GATGTGTTTGTTTACT	2.49465	GCATAACAAACAACTT	AAGTTGTTTGTTATGC	NA	GCAGAACAAACAAGTA	TACTTGTTTGTTCTGC	NA	GTAAAACAAACATATA	TATATGTTTGTTTTAC	2.86931	GCGAAACAAACATTCA	TGAATGTTTGTTTCGC	1.01199	NA	0.43418	-0.166925	NA	NA	0.151283
AACAAACC	GGTTTGTT	3.0105	ACAAAACAAACCGTCG	CGACGGTTTGTTTTGT	NA	CGCAAACAAACCCATA	TATGGGTTTGTTTGCG	NA	AGTAAACAAACCCATC	GATGGGTTTGTTTACT	2.52199	GCATAACAAACCACTT	AAGTGGTTTGTTATGC	3.01465	GCAGAACAAACCAGTA	TACTGGTTTGTTCTGC	NA	GTAAAACAAACCTATA	TATAGGTTTGTTTTAC	NA	GCGAAACAAACCTTCA	TGAAGGTTTGTTTCGC	-1.13028	NA	NA	-0.139303	-0.869372	NA	NA
AACAAACG	CGTTTGTT	4.17096	ACAAAACAAACGGTCG	CGACCGTTTGTTTTGT	NA	CGCAAACAAACGCATA	TATGCGTTTGTTTGCG	6.28361	AGTAAACAAACGCATC	GATGCGTTTGTTTACT	2.32065	GCATAACAAACGACTT	AAGTCGTTTGTTATGC	4.28437	GCAGAACAAACGAGTA	TACTCGTTTGTTCTGC	2.66843	GTAAAACAAACGTATA	TATACGTTTGTTTTAC	2.58222	GCGAAACAAACGTTCA	TGAACGTTTGTTTCGC	0.523367	NA	1.12269	-0.342704	0.189085	-0.145467	-0.146714
AACAAACT	AGTTTGTT	4.63436	ACAAAACAAACTGTCG	CGACAGTTTGTTTTGT	NA	CGCAAACAAACTCATA	TATGAGTTTGTTTGCG	5.95546	AGTAAACAAACTCATC	GATGAGTTTGTTTACT	3.32887	GCATAACAAACTACTT	AAGTAGTTTGTTATGC	NA	GCAGAACAAACTAGTA	TACTAGTTTGTTCTGC	NA	GTAAAACAAACTTATA	TATAAGTTTGTTTTAC	3.26342	GCGAAACAAACTTTCA	TGAAAGTTTGTTTCGC	1.18372	NA	0.736328	0.675836	NA	NA	0.56036
AACAAAGA	TCTTTGTT	4.33441	ACAAAACAAAGAGTCG	CGACTCTTTGTTTTGT	NA	CGCAAACAAAGACATA	TATGTCTTTGTTTGCG	NA	AGTAAACAAAGACATC	GATGTCTTTGTTTACT	3.80989	GCATAACAAAGAACTT	AAGTTCTTTGTTATGC	4.49266	GCAGAACAAAGAAGTA	TACTTCTTTGTTCTGC	1.74342	GTAAAACAAAGATATA	TATATCTTTGTTTTAC	2.10973	GCGAAACAAAGATTCA	TGAATCTTTGTTTCGC	0.75629	NA	NA	1.16178	0.362712	-1.00546	-0.637142
AACAAAGC	GCTTTGTT	4.81072	ACAAAACAAAGCGTCG	CGACGCTTTGTTTTGT	NA	CGCAAACAAAGCCATA	TATGGCTTTGTTTGCG	5.3359	AGTAAACAAAGCCATC	GATGGCTTTGTTTACT	3.59026	GCATAACAAAGCACTT	AAGTGCTTTGTTATGC	4.84739	GCAGAACAAAGCAGTA	TACTGCTTTGTTCTGC	NA	GTAAAACAAAGCTATA	TATAGCTTTGTTTTAC	1.58052	GCGAAACAAAGCTTCA	TGAAGCTTTGTTTCGC	1.43503	NA	0.00687604	0.939893	0.65842	NA	-1.18646
AACAAAGG	CCTTTGTT	3.82125	ACAAAACAAAGGGTCG	CGACCCTTTGTTTTGT	NA	CGCAAACAAAGGCATA	TATGCCTTTGTTTGCG	5.90618	AGTAAACAAAGGCATC	GATGCCTTTGTTTACT	NA	GCATAACAAAGGACTT	AAGTCCTTTGTTATGC	3.43915	GCAGAACAAAGGAGTA	TACTCCTTTGTTCTGC	0.047449	GTAAAACAAAGGTATA	TATACCTTTGTTTTAC	1.30922	GCGAAACAAAGGTTCA	TGAACCTTTGTTTCGC	0.0250352	NA	0.678312	NA	-0.515504	-2.58222	-1.46806
AACAAAGT	ACTTTGTT	4.71977	ACAAAACAAAGTGTCG	CGACACTTTGTTTTGT	NA	CGCAAACAAAGTCATA	TATGACTTTGTTTGCG	6.27493	AGTAAACAAAGTCATC	GATGACTTTGTTTACT	2.57356	GCATAACAAAGTACTT	AAGTACTTTGTTATGC	3.77255	GCAGAACAAAGTAGTA	TACTACTTTGTTCTGC	2.70359	GTAAAACAAAGTTATA	TATAACTTTGTTTTAC	1.81575	GCGAAACAAAGTTTCA	TGAAACTTTGTTTCGC	1.30542	NA	1.11247	-0.0872064	-0.237576	-0.112781	-0.942291
AACAAATA	TATTTGTT	4.6626	ACAAAACAAATAGTCG	CGACTATTTGTTTTGT	NA	CGCAAACAAATACATA	TATGTATTTGTTTGCG	6.2921	AGTAAACAAATACATC	GATGTATTTGTTTACT	2.59014	GCATAACAAATAACTT	AAGTTATTTGTTATGC	4.71502	GCAGAACAAATAAGTA	TACTTATTTGTTCTGC	1.56463	GTAAAACAAATATATA	TATATATTTGTTTTAC	NA	GCGAAACAAATATTCA	TGAATATTTGTTTCGC	1.22396	NA	1.13268	-0.070458	0.548075	-1.17168	NA
AACAAATC	GATTTGTT	4.70951	ACAAAACAAATCGTCG	CGACGATTTGTTTTGT	NA	CGCAAACAAATCCATA	TATGGATTTGTTTGCG	6.4811	AGTAAACAAATCCATC	GATGGATTTGTTTACT	3.59548	GCATAACAAATCACTT	AAGTGATTTGTTATGC	4.62635	GCAGAACAAATCAGTA	TACTGATTTGTTCTGC	NA	GTAAAACAAATCTATA	TATAGATTTGTTTTAC	2.53992	GCGAAACAAATCTTCA	TGAAGATTTGTTTCGC	1.2908	NA	1.35521	0.945173	0.47416	NA	-0.19062
AACAAATG	CATTTGTT	4.94694	ACAAAACAAATGGTCG	CGACCATTTGTTTTGT	NA	CGCAAACAAATGCATA	TATGCATTTGTTTGCG	6.49623	AGTAAACAAATGCATC	GATGCATTTGTTTACT	2.94858	GCATAACAAATGACTT	AAGTCATTTGTTATGC	3.55529	GCAGAACAAATGAGTA	TACTCATTTGTTCTGC	NA	GTAAAACAAATGTATA	TATACATTTGTTTTAC	3.7552	GCGAAACAAATGTTCA	TGAACATTTGTTTCGC	1.62914	NA	1.37303	0.291653	-0.418689	NA	1.07082
AACAAATT	AATTTGTT	4.55166	ACAAAACAAATTGTCG	CGACAATTTGTTTTGT	NA	CGCAAACAAATTCATA	TATGAATTTGTTTGCG	6.54579	AGTAAACAAATTCATC	GATGAATTTGTTTACT	2.20322	GCATAACAAATTACTT	AAGTAATTTGTTATGC	1.45781	GCAGAACAAATTAGTA	TACTAATTTGTTCTGC	NA	GTAAAACAAATTTATA	TATAAATTTGTTTTAC	2.62643	GCGAAACAAATTTTCA	TGAAAATTTGTTTCGC	1.06587	NA	1.43138	-0.461334	-2.16718	NA	-0.100822
AACAACAA	TTGTTGTT	4.3629	ACAAAACAACAAGTCG	CGACTTGTTGTTTTGT	NA	CGCAAACAACAACATA	TATGTTGTTGTTTGCG	6.26193	AGTAAACAACAACATC	GATGTTGTTGTTTACT	3.69098	GCATAACAACAAACTT	AAGTTTGTTGTTATGC	4.06672	GCAGAACAACAAAGTA	TACTTTGTTGTTCTGC	NA	GTAAAACAACAATATA	TATATTGTTGTTTTAC	NA	GCGAAACAACAATTCA	TGAATTGTTGTTTCGC	0.796884	NA	1.09716	1.04165	0.00764747	NA	NA
AACAACAC	GTGTTGTT	5.30632	ACAAAACAACACGTCG	CGACGTGTTGTTTTGT	NA	CGCAAACAACACCATA	TATGGTGTTGTTTGCG	5.97816	AGTAAACAACACCATC	GATGGTGTTGTTTACT	3.9624	GCATAACAACACACTT	AAGTGTGTTGTTATGC	NA	GCAGAACAACACAGTA	TACTGTGTTGTTCTGC	NA	GTAAAACAACACTATA	TATAGTGTTGTTTTAC	NA	GCGAAACAACACTTCA	TGAAGTGTTGTTTCGC	2.14125	NA	0.763061	1.31585	NA	NA	NA
AACAACAG	CTGTTGTT	3.52503	ACAAAACAACAGGTCG	CGACCTGTTGTTTTGT	NA	CGCAAACAACAGCATA	TATGCTGTTGTTTGCG	6.09711	AGTAAACAACAGCATC	GATGCTGTTGTTTACT	4.16634	GCATAACAACAGACTT	AAGTCTGTTGTTATGC	4.94367	GCAGAACAACAGAGTA	TACTCTGTTGTTCTGC	NA	GTAAAACAACAGTATA	TATACTGTTGTTTTAC	2.75753	GCGAAACAACAGTTCA	TGAACTGTTGTTTCGC	-0.397083	NA	0.903105	1.52187	0.738685	NA	0.0352614
AACAACAT	ATGTTGTT	4.59751	ACAAAACAACATGTCG	CGACATGTTGTTTTGT	NA	CGCAAACAACATCATA	TATGATGTTGTTTGCG	6.42032	AGTAAACAACATCATC	GATGATGTTGTTTACT	3.6977	GCATAACAACATACTT	AAGTATGTTGTTATGC	4.46162	GCAGAACAACATAGTA	TACTATGTTGTTCTGC	2.18838	GTAAAACAACATTATA	TATAATGTTGTTTTAC	2.43044	GCGAAACAACATTTCA	TGAAATGTTGTTTCGC	1.13121	NA	1.28365	1.04843	0.336836	-0.591777	-0.304254
AACAACCA	TGGTTGTT	4.69644	ACAAAACAACCAGTCG	CGACTGGTTGTTTTGT	4.0415	CGCAAACAACCACATA	TATGTGGTTGTTTGCG	6.54542	AGTAAACAACCACATC	GATGTGGTTGTTTACT	1.83331	GCATAACAACCAACTT	AAGTTGGTTGTTATGC	3.98158	GCAGAACAACCAAGTA	TACTTGGTTGTTCTGC	NA	GTAAAACAACCATATA	TATATGGTTGTTTTAC	NA	GCGAAACAACCATTCA	TGAATGGTTGTTTCGC	1.27217	-1.11721	1.43094	-0.835031	-0.0633294	NA	NA
AACAACCC	GGGTTGTT	4.76956	ACAAAACAACCCGTCG	CGACGGGTTGTTTTGT	NA	CGCAAACAACCCCATA	TATGGGGTTGTTTGCG	6.09554	AGTAAACAACCCCATC	GATGGGGTTGTTTACT	3.49191	GCATAACAACCCACTT	AAGTGGGTTGTTATGC	3.75442	GCAGAACAACCCAGTA	TACTGGGTTGTTCTGC	NA	GTAAAACAACCCTATA	TATAGGGTTGTTTTAC	NA	GCGAAACAACCCTTCA	TGAAGGGTTGTTTCGC	1.37637	NA	0.901254	0.840538	-0.252691	NA	NA
AACAACCG	CGGTTGTT	5.39825	ACAAAACAACCGGTCG	CGACCGGTTGTTTTGT	NA	CGCAAACAACCGCATA	TATGCGGTTGTTTGCG	6.33226	AGTAAACAACCGCATC	GATGCGGTTGTTTACT	3.25395	GCATAACAACCGACTT	AAGTCGGTTGTTATGC	4.74015	GCAGAACAACCGAGTA	TACTCGGTTGTTCTGC	2.52408	GTAAAACAACCGTATA	TATACGGTTGTTTTAC	NA	GCGAAACAACCGTTCA	TGAACGGTTGTTTCGC	2.27225	NA	1.17997	0.600148	0.569022	-0.279673	NA
AACAACCT	AGGTTGTT	2.42051	ACAAAACAACCTGTCG	CGACAGGTTGTTTTGT	NA	CGCAAACAACCTCATA	TATGAGGTTGTTTGCG	6.58483	AGTAAACAACCTCATC	GATGAGGTTGTTTACT	2.92354	GCATAACAACCTACTT	AAGTAGGTTGTTATGC	4.17953	GCAGAACAACCTAGTA	TACTAGGTTGTTCTGC	NA	GTAAAACAACCTTATA	TATAAGGTTGTTTTAC	NA	GCGAAACAACCTTTCA	TGAAAGGTTGTTTCGC	-1.97102	NA	1.47734	0.266349	0.101687	NA	NA
AACAACGA	TCGTTGTT	3.86874	ACAAAACAACGAGTCG	CGACTCGTTGTTTTGT	NA	CGCAAACAACGACATA	TATGTCGTTGTTTGCG	5.56588	AGTAAACAACGACATC	GATGTCGTTGTTTACT	4.45054	GCATAACAACGAACTT	AAGTTCGTTGTTATGC	NA	GCAGAACAACGAAGTA	TACTTCGTTGTTCTGC	NA	GTAAAACAACGATATA	TATATCGTTGTTTTAC	NA	GCGAAACAACGATTCA	TGAATCGTTGTTTCGC	0.0927105	NA	0.277646	1.80898	NA	NA	NA
AACAACGC	GCGTTGTT	4.42162	ACAAAACAACGCGTCG	CGACGCGTTGTTTTGT	NA	CGCAAACAACGCCATA	TATGGCGTTGTTTGCG	5.44932	AGTAAACAACGCCATC	GATGGCGTTGTTTACT	3.90165	GCATAACAACGCACTT	AAGTGCGTTGTTATGC	NA	GCAGAACAACGCAGTA	TACTGCGTTGTTCTGC	NA	GTAAAACAACGCTATA	TATAGCGTTGTTTTAC	2.97663	GCGAAACAACGCTTCA	TGAAGCGTTGTTTCGC	0.880565	NA	0.140416	1.25447	NA	NA	0.262676
AACAACGG	CCGTTGTT	4.21482	ACAAAACAACGGGTCG	CGACCCGTTGTTTTGT	NA	CGCAAACAACGGCATA	TATGCCGTTGTTTGCG	5.93954	AGTAAACAACGGCATC	GATGCCGTTGTTTACT	3.61992	GCATAACAACGGACTT	AAGTCCGTTGTTATGC	3.41839	GCAGAACAACGGAGTA	TACTCCGTTGTTCTGC	2.21291	GTAAAACAACGGTATA	TATACCGTTGTTTTAC	2.62501	GCGAAACAACGGTTCA	TGAACCGTTGTTTCGC	0.585877	NA	0.717594	0.969858	-0.532815	-0.568971	-0.102291
AACAACGT	ACGTTGTT	4.16597	ACAAAACAACGTGTCG	CGACACGTTGTTTTGT	NA	CGCAAACAACGTCATA	TATGACGTTGTTTGCG	6.26165	AGTAAACAACGTCATC	GATGACGTTGTTTACT	3.15611	GCATAACAACGTACTT	AAGTACGTTGTTATGC	4.12224	GCAGAACAACGTAGTA	TACTACGTTGTTCTGC	2.41491	GTAAAACAACGTTATA	TATAACGTTGTTTTAC	1.98593	GCGAAACAACGTTTCA	TGAAACGTTGTTTCGC	0.516257	NA	1.09683	0.501305	0.0539298	-0.38117	-0.76565
AACAACTA	TAGTTGTT	3.78054	ACAAAACAACTAGTCG	CGACTAGTTGTTTTGT	NA	CGCAAACAACTACATA	TATGTAGTTGTTTGCG	6.29966	AGTAAACAACTACATC	GATGTAGTTGTTTACT	2.32636	GCATAACAACTAACTT	AAGTTAGTTGTTATGC	4.33668	GCAGAACAACTAAGTA	TACTTAGTTGTTCTGC	NA	GTAAAACAACTATATA	TATATAGTTGTTTTAC	NA	GCGAAACAACTATTCA	TGAATAGTTGTTTCGC	-0.032973	NA	1.14159	-0.336941	0.232686	NA	NA
AACAACTC	GAGTTGTT	5.30086	ACAAAACAACTCGTCG	CGACGAGTTGTTTTGT	NA	CGCAAACAACTCCATA	TATGGAGTTGTTTGCG	NA	AGTAAACAACTCCATC	GATGGAGTTGTTTACT	1.80554	GCATAACAACTCACTT	AAGTGAGTTGTTATGC	4.55402	GCAGAACAACTCAGTA	TACTGAGTTGTTCTGC	2.16338	GTAAAACAACTCTATA	TATAGAGTTGTTTTAC	NA	GCGAAACAACTCTTCA	TGAAGAGTTGTTTCGC	2.13348	NA	NA	-0.863084	0.413862	-0.615015	NA
AACAACTG	CAGTTGTT	5.1357	ACAAAACAACTGGTCG	CGACCAGTTGTTTTGT	4.46815	CGCAAACAACTGCATA	TATGCAGTTGTTTGCG	5.87389	AGTAAACAACTGCATC	GATGCAGTTGTTTACT	3.30968	GCATAACAACTGACTT	AAGTCAGTTGTTATGC	4.5432	GCAGAACAACTGAGTA	TACTCAGTTGTTCTGC	2.90547	GTAAAACAACTGTATA	TATACAGTTGTTTTAC	2.89212	GCGAAACAACTGTTCA	TGAACAGTTGTTTCGC	1.89812	-0.548759	0.640293	0.65645	0.404845	0.0749061	0.174956
AACAACTT	AAGTTGTT	4.40034	ACAAAACAACTTGTCG	CGACAAGTTGTTTTGT	NA	CGCAAACAACTTCATA	TATGAAGTTGTTTGCG	3.39117	AGTAAACAACTTCATC	GATGAAGTTGTTTACT	2.51945	GCATAACAACTTACTT	AAGTAAGTTGTTATGC	3.77687	GCAGAACAACTTAGTA	TACTAAGTTGTTCTGC	NA	GTAAAACAACTTTATA	TATAAAGTTGTTTTAC	0.614882	GCGAAACAACTTTTCA	TGAAAAGTTGTTTCGC	0.850239	NA	-2.28283	-0.141876	-0.233977	NA	-2.18876
AACAAGAA	TTCTTGTT	3.81224	ACAAAACAAGAAGTCG	CGACTTCTTGTTTTGT	NA	CGCAAACAAGAACATA	TATGTTCTTGTTTGCG	5.74199	AGTAAACAAGAACATC	GATGTTCTTGTTTACT	2.84555	GCATAACAAGAAACTT	AAGTTTCTTGTTATGC	3.42229	GCAGAACAAGAAAGTA	TACTTTCTTGTTCTGC	NA	GTAAAACAAGAATATA	TATATTCTTGTTTTAC	3.0096	GCGAAACAAGAATTCA	TGAATTCTTGTTTCGC	0.0121969	NA	0.485001	0.187565	-0.529565	NA	0.296897
AACAAGAC	GTCTTGTT	4.24539	ACAAAACAAGACGTCG	CGACGTCTTGTTTTGT	NA	CGCAAACAAGACCATA	TATGGTCTTGTTTGCG	6.97319	AGTAAACAAGACCATC	GATGGTCTTGTTTACT	2.97816	GCATAACAAGACACTT	AAGTGTCTTGTTATGC	3.14177	GCAGAACAAGACAGTA	TACTGTCTTGTTCTGC	NA	GTAAAACAAGACTATA	TATAGTCTTGTTTTAC	NA	GCGAAACAAGACTTCA	TGAAGTCTTGTTTCGC	0.629432	NA	1.93459	0.321532	-0.763403	NA	NA
AACAAGAG	CTCTTGTT	3.24908	ACAAAACAAGAGGTCG	CGACCTCTTGTTTTGT	NA	CGCAAACAAGAGCATA	TATGCTCTTGTTTGCG	6.16101	AGTAAACAAGAGCATC	GATGCTCTTGTTTACT	3.51477	GCATAACAAGAGACTT	AAGTCTCTTGTTATGC	5.06133	GCAGAACAAGAGAGTA	TACTCTCTTGTTCTGC	2.45058	GTAAAACAAGAGTATA	TATACTCTTGTTTTAC	2.28268	GCGAAACAAGAGTTCA	TGAACTCTTGTTTCGC	-0.790305	NA	0.978349	0.86363	0.836764	-0.348002	-0.457631
AACAAGAT	ATCTTGTT	4.18627	ACAAAACAAGATGTCG	CGACATCTTGTTTTGT	NA	CGCAAACAAGATCATA	TATGATCTTGTTTGCG	6.89094	AGTAAACAAGATCATC	GATGATCTTGTTTACT	3.57351	GCATAACAAGATACTT	AAGTATCTTGTTATGC	NA	GCAGAACAAGATAGTA	TACTATCTTGTTCTGC	2.99511	GTAAAACAAGATTATA	TATAATCTTGTTTTAC	NA	GCGAAACAAGATTTCA	TGAAATCTTGTTTCGC	0.545183	NA	1.83775	0.92298	NA	0.158248	NA
AACAAGCA	TGCTTGTT	4.76935	ACAAAACAAGCAGTCG	CGACTGCTTGTTTTGT	NA	CGCAAACAAGCACATA	TATGTGCTTGTTTGCG	6.04655	AGTAAACAAGCACATC	GATGTGCTTGTTTACT	3.13657	GCATAACAAGCAACTT	AAGTTGCTTGTTATGC	4.84483	GCAGAACAAGCAAGTA	TACTTGCTTGTTCTGC	NA	GTAAAACAAGCATATA	TATATGCTTGTTTTAC	NA	GCGAAACAAGCATTCA	TGAATGCTTGTTTCGC	1.37608	NA	0.843586	0.481562	0.656291	NA	NA
AACAAGCC	GGCTTGTT	4.49478	ACAAAACAAGCCGTCG	CGACGGCTTGTTTTGT	NA	CGCAAACAAGCCCATA	TATGGGCTTGTTTGCG	6.72863	AGTAAACAAGCCCATC	GATGGGCTTGTTTACT	3.00818	GCATAACAAGCCACTT	AAGTGGCTTGTTATGC	3.75739	GCAGAACAAGCCAGTA	TACTGGCTTGTTCTGC	NA	GTAAAACAAGCCTATA	TATAGGCTTGTTTTAC	NA	GCGAAACAAGCCTTCA	TGAAGGCTTGTTTCGC	0.98481	NA	1.64665	0.351855	-0.250217	NA	NA
AACAAGCG	CGCTTGTT	4.31865	ACAAAACAAGCGGTCG	CGACCGCTTGTTTTGT	4.64159	CGCAAACAAGCGCATA	TATGCGCTTGTTTGCG	6.03494	AGTAAACAAGCGCATC	GATGCGCTTGTTTACT	3.58407	GCATAACAAGCGACTT	AAGTCGCTTGTTATGC	5.2971	GCAGAACAAGCGAGTA	TACTCGCTTGTTCTGC	2.81758	GTAAAACAAGCGTATA	TATACGCTTGTTTTAC	3.12446	GCGAAACAAGCGTTCA	TGAACGCTTGTTTCGC	0.733832	-0.317675	0.829909	0.933642	1.03331	-0.00680043	0.416121
AACAAGCT	AGCTTGTT	4.75039	ACAAAACAAGCTGTCG	CGACAGCTTGTTTTGT	4.76095	CGCAAACAAGCTCATA	TATGAGCTTGTTTGCG	6.40834	AGTAAACAAGCTCATC	GATGAGCTTGTTTACT	2.05028	GCATAACAAGCTACTT	AAGTAGCTTGTTATGC	3.02987	GCAGAACAAGCTAGTA	TACTAGCTTGTTCTGC	2.54079	GTAAAACAAGCTTATA	TATAAGCTTGTTTTAC	3.12488	GCGAAACAAGCTTTCA	TGAAAGCTTGTTTCGC	1.34905	-0.158649	1.26955	-0.615845	-0.856684	-0.264133	0.416561
AACAAGGA	TCCTTGTT	3.14483	ACAAAACAAGGAGTCG	CGACTCCTTGTTTTGT	NA	CGCAAACAAGGACATA	TATGTCCTTGTTTGCG	4.80394	AGTAAACAAGGACATC	GATGTCCTTGTTTACT	2.16763	GCATAACAAGGAACTT	AAGTTCCTTGTTATGC	4.5532	GCAGAACAAGGAAGTA	TACTTCCTTGTTCTGC	1.89154	GTAAAACAAGGATATA	TATATCCTTGTTTTAC	0.505	GCGAAACAAGGATTCA	TGAATCCTTGTTTCGC	-0.938863	NA	-0.619447	-0.497293	0.413185	-0.867752	-2.30282
AACAAGGC	GCCTTGTT	3.53104	ACAAAACAAGGCGTCG	CGACGCCTTGTTTTGT	4.82346	CGCAAACAAGGCCATA	TATGGCCTTGTTTGCG	7.38459	AGTAAACAAGGCCATC	GATGGCCTTGTTTACT	2.17533	GCATAACAAGGCACTT	AAGTGCCTTGTTATGC	4.06982	GCAGAACAAGGCAGTA	TACTGCCTTGTTCTGC	NA	GTAAAACAAGGCTATA	TATAGCCTTGTTTTAC	1.54706	GCGAAACAAGGCTTCA	TGAAGCCTTGTTTCGC	-0.388509	-0.0753628	2.41897	-0.489517	0.0102272	NA	-1.22118
AACAAGGG	CCCTTGTT	3.80262	ACAAAACAAGGGGTCG	CGACCCCTTGTTTTGT	5.55374	CGCAAACAAGGGCATA	TATGCCCTTGTTTGCG	6.95453	AGTAAACAAGGGCATC	GATGCCCTTGTTTACT	2.30224	GCATAACAAGGGACTT	AAGTCCCTTGTTATGC	3.98033	GCAGAACAAGGGAGTA	TACTCCCTTGTTCTGC	2.43914	GTAAAACAAGGGTATA	TATACCCTTGTTTTAC	1.96309	GCGAAACAAGGGTTCA	TGAACCCTTGTTTCGC	-0.00151267	0.897632	1.91262	-0.361303	-0.0643721	-0.358647	-0.789353
AACAAGGT	ACCTTGTT	2.56407	ACAAAACAAGGTGTCG	CGACACCTTGTTTTGT	5.76636	CGCAAACAAGGTCATA	TATGACCTTGTTTGCG	7.68822	AGTAAACAAGGTCATC	GATGACCTTGTTTACT	0.665938	GCATAACAAGGTACTT	AAGTACCTTGTTATGC	-0.0098716	GCAGAACAAGGTAGTA	TACTACCTTGTTCTGC	3.09752	GTAAAACAAGGTTATA	TATAACCTTGTTTTAC	1.70948	GCGAAACAAGGTTTCA	TGAAACCTTGTTTCGC	-1.76645	1.18091	2.77645	-2.01435	-3.39066	0.253457	-1.05259
AACAAGTA	TACTTGTT	4.00562	ACAAAACAAGTAGTCG	CGACTACTTGTTTTGT	NA	CGCAAACAAGTACATA	TATGTACTTGTTTGCG	6.75169	AGTAAACAAGTACATC	GATGTACTTGTTTACT	1.73558	GCATAACAAGTAACTT	AAGTTACTTGTTATGC	3.98839	GCAGAACAAGTAAGTA	TACTTACTTGTTCTGC	3.50866	GTAAAACAAGTATATA	TATATACTTGTTTTAC	2.88715	GCGAAACAAGTATTCA	TGAATACTTGTTTCGC	0.287766	NA	1.6738	-0.933768	-0.0576479	0.635695	0.169801
AACAAGTC	GACTTGTT	4.93905	ACAAAACAAGTCGTCG	CGACGACTTGTTTTGT	4.22624	CGCAAACAAGTCCATA	TATGGACTTGTTTGCG	6.46803	AGTAAACAAGTCCATC	GATGGACTTGTTTACT	3.05889	GCATAACAAGTCACTT	AAGTGACTTGTTATGC	3.94704	GCAGAACAAGTCAGTA	TACTGACTTGTTCTGC	NA	GTAAAACAAGTCTATA	TATAGACTTGTTTTAC	2.51682	GCGAAACAAGTCTTCA	TGAAGACTTGTTTCGC	1.61789	-0.871078	1.33983	0.403083	-0.0921255	NA	-0.214597
AACAAGTG	CACTTGTT	3.18787	ACAAAACAAGTGGTCG	CGACCACTTGTTTTGT	5.1693	CGCAAACAAGTGCATA	TATGCACTTGTTTGCG	5.85341	AGTAAACAAGTGCATC	GATGCACTTGTTTACT	2.56877	GCATAACAAGTGACTT	AAGTCACTTGTTATGC	4.84512	GCAGAACAAGTGAGTA	TACTCACTTGTTCTGC	2.9982	GTAAAACAAGTGTATA	TATACACTTGTTTTAC	3.78518	GCGAAACAAGTGTTCA	TGAACACTTGTTTCGC	-0.877531	0.38542	0.616177	-0.0920516	0.656533	0.161122	1.10193
AACAAGTT	AACTTGTT	3.99305	ACAAAACAAGTTGTCG	CGACAACTTGTTTTGT	4.08263	CGCAAACAAGTTCATA	TATGAACTTGTTTGCG	6.84539	AGTAAACAAGTTCATC	GATGAACTTGTTTACT	1.20694	GCATAACAAGTTACTT	AAGTAACTTGTTATGC	1.50491	GCAGAACAAGTTAGTA	TACTAACTTGTTCTGC	2.17953	GTAAAACAAGTTTATA	TATAAACTTGTTTTAC	2.54988	GCGAAACAAGTTTTCA	TGAAAACTTGTTTCGC	0.269844	-1.0624	1.78412	-1.46782	-2.12791	-0.600006	-0.180278
AACAATAA	TTATTGTT	4.10666	ACAAAACAATAAGTCG	CGACTTATTGTTTTGT	NA	CGCAAACAATAACATA	TATGTTATTGTTTGCG	6.76667	AGTAAACAATAACATC	GATGTTATTGTTTACT	3.38051	GCATAACAATAAACTT	AAGTTTATTGTTATGC	4.45076	GCAGAACAATAAAGTA	TACTTTATTGTTCTGC	NA	GTAAAACAATAATATA	TATATTATTGTTTTAC	2.30051	GCGAAACAATAATTCA	TGAATTATTGTTTCGC	0.431741	NA	1.69143	0.727998	0.32779	NA	-0.43912
AACAATAC	GTATTGTT	4.53708	ACAAAACAATACGTCG	CGACGTATTGTTTTGT	NA	CGCAAACAATACCATA	TATGGTATTGTTTGCG	5.95562	AGTAAACAATACCATC	GATGGTATTGTTTACT	3.66382	GCATAACAATACACTT	AAGTGTATTGTTATGC	4.94038	GCAGAACAATACAGTA	TACTGTATTGTTCTGC	NA	GTAAAACAATACTATA	TATAGTATTGTTTTAC	NA	GCGAAACAATACTTCA	TGAAGTATTGTTTCGC	1.04509	NA	0.736522	1.01421	0.735939	NA	NA
AACAATAG	CTATTGTT	4.26723	ACAAAACAATAGGTCG	CGACCTATTGTTTTGT	NA	CGCAAACAATAGCATA	TATGCTATTGTTTGCG	5.96461	AGTAAACAATAGCATC	GATGCTATTGTTTACT	4.15124	GCATAACAATAGACTT	AAGTCTATTGTTATGC	NA	GCAGAACAATAGAGTA	TACTCTATTGTTCTGC	NA	GTAAAACAATAGTATA	TATACTATTGTTTTAC	0.487939	GCGAAACAATAGTTCA	TGAACTATTGTTTCGC	0.66055	NA	0.7471	1.50662	NA	NA	-2.32053
AACAATAT	ATATTGTT	4.40685	ACAAAACAATATGTCG	CGACATATTGTTTTGT	NA	CGCAAACAATATCATA	TATGATATTGTTTGCG	6.45009	AGTAAACAATATCATC	GATGATATTGTTTACT	2.76326	GCATAACAATATACTT	AAGTATATTGTTATGC	3.68654	GCAGAACAATATAGTA	TACTATATTGTTCTGC	NA	GTAAAACAATATTATA	TATAATATTGTTTTAC	2.23438	GCGAAACAATATTTCA	TGAAATATTGTTTCGC	0.859514	NA	1.3187	0.104434	-0.309281	NA	-0.507764
AACAATCA	TGATTGTT	4.80709	ACAAAACAATCAGTCG	CGACTGATTGTTTTGT	NA	CGCAAACAATCACATA	TATGTGATTGTTTGCG	6.09873	AGTAAACAATCACATC	GATGTGATTGTTTACT	2.1546	GCATAACAATCAACTT	AAGTTGATTGTTATGC	4.48721	GCAGAACAATCAAGTA	TACTTGATTGTTCTGC	0.706447	GTAAAACAATCATATA	TATATGATTGTTTTAC	NA	GCGAAACAATCATTCA	TGAATGATTGTTTCGC	1.42986	NA	0.90502	-0.51046	0.358174	-1.96954	NA
AACAATCC	GGATTGTT	4.30724	ACAAAACAATCCGTCG	CGACGGATTGTTTTGT	NA	CGCAAACAATCCCATA	TATGGGATTGTTTGCG	NA	AGTAAACAATCCCATC	GATGGGATTGTTTACT	3.93676	GCATAACAATCCACTT	AAGTGGATTGTTATGC	4.66224	GCAGAACAATCCAGTA	TACTGGATTGTTCTGC	2.9207	GTAAAACAATCCTATA	TATAGGATTGTTTTAC	NA	GCGAAACAATCCTTCA	TGAAGGATTGTTTCGC	0.717564	NA	NA	1.28995	0.504076	0.0890671	NA
AACAATCG	CGATTGTT	4.20183	ACAAAACAATCGGTCG	CGACCGATTGTTTTGT	4.80495	CGCAAACAATCGCATA	TATGCGATTGTTTGCG	5.99611	AGTAAACAATCGCATC	GATGCGATTGTTTACT	3.1309	GCATAACAATCGACTT	AAGTCGATTGTTATGC	3.60977	GCAGAACAATCGAGTA	TACTCGATTGTTCTGC	1.75246	GTAAAACAATCGTATA	TATACGATTGTTTTAC	NA	GCGAAACAATCGTTCA	TGAACGATTGTTTCGC	0.567355	-0.10003	0.784188	0.475838	-0.373277	-0.997055	NA
AACAATCT	AGATTGTT	4.81924	ACAAAACAATCTGTCG	CGACAGATTGTTTTGT	NA	CGCAAACAATCTCATA	TATGAGATTGTTTGCG	6.07867	AGTAAACAATCTCATC	GATGAGATTGTTTACT	3.73524	GCATAACAATCTACTT	AAGTAGATTGTTATGC	5.27206	GCAGAACAATCTAGTA	TACTAGATTGTTCTGC	NA	GTAAAACAATCTTATA	TATAAGATTGTTTTAC	2.86332	GCGAAACAATCTTTCA	TGAAAGATTGTTTCGC	1.44717	NA	0.881394	1.08636	1.01243	NA	0.145063
AACAATGA	TCATTGTT	5.68165	ACAAAACAATGAGTCG	CGACTCATTGTTTTGT	NA	CGCAAACAATGACATA	TATGTCATTGTTTGCG	5.99476	AGTAAACAATGACATC	GATGTCATTGTTTACT	4.24599	GCATAACAATGAACTT	AAGTTCATTGTTATGC	4.90843	GCAGAACAATGAAGTA	TACTTCATTGTTCTGC	2.38758	GTAAAACAATGATATA	TATATCATTGTTTTAC	1.47234	GCGAAACAATGATTCA	TGAATCATTGTTTCGC	2.6761	NA	0.782602	1.60233	0.709303	-0.406582	-1.29874
AACAATGC	GCATTGTT	4.19855	ACAAAACAATGCGTCG	CGACGCATTGTTTTGT	NA	CGCAAACAATGCCATA	TATGGCATTGTTTGCG	6.68406	AGTAAACAATGCCATC	GATGGCATTGTTTACT	2.02512	GCATAACAATGCACTT	AAGTGCATTGTTATGC	4.13813	GCAGAACAATGCAGTA	TACTGCATTGTTCTGC	NA	GTAAAACAATGCTATA	TATAGCATTGTTTTAC	1.1374	GCGAAACAATGCTTCA	TGAAGCATTGTTTCGC	0.562685	NA	1.59417	-0.641258	0.0671754	NA	-1.6464
AACAATGG	CCATTGTT	4.60911	ACAAAACAATGGGTCG	CGACCCATTGTTTTGT	5.56805	CGCAAACAATGGCATA	TATGCCATTGTTTGCG	5.72895	AGTAAACAATGGCATC	GATGCCATTGTTTACT	3.72371	GCATAACAATGGACTT	AAGTCCATTGTTATGC	4.23584	GCAGAACAATGGAGTA	TACTCCATTGTTCTGC	2.00034	GTAAAACAATGGTATA	TATACCATTGTTTTAC	1.68449	GCGAAACAATGGTTCA	TGAACCATTGTTTCGC	1.14774	0.916689	0.469638	1.07471	0.148623	-0.7666	-1.07854
AACAATGT	ACATTGTT	4.40105	ACAAAACAATGTGTCG	CGACACATTGTTTTGT	5.25777	CGCAAACAATGTCATA	TATGACATTGTTTGCG	5.85118	AGTAAACAATGTCATC	GATGACATTGTTTACT	3.54352	GCATAACAATGTACTT	AAGTACATTGTTATGC	5.14086	GCAGAACAATGTAGTA	TACTACATTGTTCTGC	2.09513	GTAAAACAATGTTATA	TATAACATTGTTTTAC	1.77958	GCGAAACAATGTTTCA	TGAAACATTGTTTCGC	0.851252	0.503294	0.613553	0.89268	0.903067	-0.678467	-0.979831
AACAATTA	TAATTGTT	4.43735	ACAAAACAATTAGTCG	CGACTAATTGTTTTGT	NA	CGCAAACAATTACATA	TATGTAATTGTTTGCG	5.78485	AGTAAACAATTACATC	GATGTAATTGTTTACT	1.68395	GCATAACAATTAACTT	AAGTTAATTGTTATGC	2.01037	GCAGAACAATTAAGTA	TACTTAATTGTTCTGC	NA	GTAAAACAATTATATA	TATATAATTGTTTTAC	NA	GCGAAACAATTATTCA	TGAATAATTGTTTCGC	0.902976	NA	0.535459	-0.985924	-1.70656	NA	NA
AACAATTC	GAATTGTT	5.60121	ACAAAACAATTCGTCG	CGACGAATTGTTTTGT	NA	CGCAAACAATTCCATA	TATGGAATTGTTTGCG	6.30827	AGTAAACAATTCCATC	GATGGAATTGTTTACT	3.06718	GCATAACAATTCACTT	AAGTGAATTGTTATGC	4.52549	GCAGAACAATTCAGTA	TACTGAATTGTTCTGC	2.08965	GTAAAACAATTCTATA	TATAGAATTGTTTTAC	3.25869	GCGAAACAATTCTTCA	TGAAGAATTGTTTCGC	2.56148	NA	1.15173	0.411467	0.390081	-0.683566	0.55545
AACAATTG	CAATTGTT	3.99778	ACAAAACAATTGGTCG	CGACCAATTGTTTTGT	4.12398	CGCAAACAATTGCATA	TATGCAATTGTTTGCG	6.18722	AGTAAACAATTGCATC	GATGCAATTGTTTACT	3.46082	GCATAACAATTGACTT	AAGTCAATTGTTATGC	3.54311	GCAGAACAATTGAGTA	TACTCAATTGTTCTGC	2.57292	GTAAAACAATTGTATA	TATACAATTGTTTTAC	2.89851	GCGAAACAATTGTTCA	TGAACAATTGTTTCGC	0.276584	-1.00732	1.0092	0.809127	-0.428848	-0.234262	0.181587
AACAATTT	AAATTGTT	4.50071	ACAAAACAATTTGTCG	CGACAAATTGTTTTGT	5.12395	CGCAAACAATTTCATA	TATGAAATTGTTTGCG	5.88453	AGTAAACAATTTCATC	GATGAAATTGTTTACT	3.41224	GCATAACAATTTACTT	AAGTAAATTGTTATGC	4.06622	GCAGAACAATTTAGTA	TACTAAATTGTTCTGC	2.07863	GTAAAACAATTTTATA	TATAAAATTGTTTTAC	2.6195	GCGAAACAATTTTTCA	TGAAAAATTGTTTCGC	0.993256	0.324994	0.652816	0.760054	0.00722583	-0.69381	-0.108016
AACACAAA	TTTGTGTT	4.36409	ACAAAACACAAAGTCG	CGACTTTGTGTTTTGT	NA	CGCAAACACAAACATA	TATGTTTGTGTTTGCG	6.06971	AGTAAACACAAACATC	GATGTTTGTGTTTACT	NA	GCATAACACAAAACTT	AAGTTTTGTGTTATGC	5.19001	GCAGAACACAAAAGTA	TACTTTTGTGTTCTGC	NA	GTAAAACACAAATATA	TATATTTGTGTTTTAC	NA	GCGAAACACAAATTCA	TGAATTTGTGTTTCGC	0.798575	NA	0.87085	NA	0.944035	NA	NA
AACACAAC	GTTGTGTT	3.95696	ACAAAACACAACGTCG	CGACGTTGTGTTTTGT	NA	CGCAAACACAACCATA	TATGGTTGTGTTTGCG	6.06256	AGTAAACACAACCATC	GATGGTTGTGTTTACT	3.72828	GCATAACACAACACTT	AAGTGTTGTGTTATGC	NA	GCAGAACACAACAGTA	TACTGTTGTGTTCTGC	NA	GTAAAACACAACTATA	TATAGTTGTGTTTTAC	NA	GCGAAACACAACTTCA	TGAAGTTGTGTTTCGC	0.218421	NA	0.862433	1.07933	NA	NA	NA
AACACAAG	CTTGTGTT	4.84217	ACAAAACACAAGGTCG	CGACCTTGTGTTTTGT	4.4569	CGCAAACACAAGCATA	TATGCTTGTGTTTGCG	5.61367	AGTAAACACAAGCATC	GATGCTTGTGTTTACT	3.40919	GCATAACACAAGACTT	AAGTCTTGTGTTATGC	NA	GCAGAACACAAGAGTA	TACTCTTGTGTTCTGC	NA	GTAAAACACAAGTATA	TATACTTGTGTTTTAC	2.00145	GCGAAACACAAGTTCA	TGAACTTGTGTTTCGC	1.47984	-0.563745	0.333912	0.756975	NA	NA	-0.749535
AACACAAT	ATTGTGTT	3.89089	ACAAAACACAATGTCG	CGACATTGTGTTTTGT	NA	CGCAAACACAATCATA	TATGATTGTGTTTGCG	5.86681	AGTAAACACAATCATC	GATGATTGTGTTTACT	3.17361	GCATAACACAATACTT	AAGTATTGTGTTATGC	4.20948	GCAGAACACAATAGTA	TACTATTGTGTTCTGC	NA	GTAAAACACAATTATA	TATAATTGTGTTTTAC	3.11942	GCGAAACACAATTTCA	TGAAATTGTGTTTCGC	0.124274	NA	0.631961	0.518979	0.126651	NA	0.410887
AACACACA	TGTGTGTT	4.25052	ACAAAACACACAGTCG	CGACTGTGTGTTTTGT	NA	CGCAAACACACACATA	TATGTGTGTGTTTGCG	6.34697	AGTAAACACACACATC	GATGTGTGTGTTTACT	3.04642	GCATAACACACAACTT	AAGTTGTGTGTTATGC	NA	GCAGAACACACAAGTA	TACTTGTGTGTTCTGC	3.77122	GTAAAACACACATATA	TATATGTGTGTTTTAC	NA	GCGAAACACACATTCA	TGAATGTGTGTTTCGC	0.636744	NA	1.19729	0.390488	NA	0.879806	NA
AACACACC	GGTGTGTT	3.6802	ACAAAACACACCGTCG	CGACGGTGTGTTTTGT	NA	CGCAAACACACCCATA	TATGGGTGTGTTTGCG	6.04907	AGTAAACACACCCATC	GATGGGTGTGTTTACT	2.75436	GCATAACACACCACTT	AAGTGGTGTGTTATGC	NA	GCAGAACACACCAGTA	TACTGGTGTGTTCTGC	NA	GTAAAACACACCTATA	TATAGGTGTGTTTTAC	NA	GCGAAACACACCTTCA	TGAAGGTGTGTTTCGC	-0.175958	NA	0.846553	0.0954399	NA	NA	NA
AACACACG	CGTGTGTT	4.29285	ACAAAACACACGGTCG	CGACCGTGTGTTTTGT	NA	CGCAAACACACGCATA	TATGCGTGTGTTTGCG	5.51246	AGTAAACACACGCATC	GATGCGTGTGTTTACT	1.86665	GCATAACACACGACTT	AAGTCGTGTGTTATGC	NA	GCAGAACACACGAGTA	TACTCGTGTGTTCTGC	2.6891	GTAAAACACACGTATA	TATACGTGTGTTTTAC	NA	GCGAAACACACGTTCA	TGAACGTGTGTTTCGC	0.697066	NA	0.214745	-0.801355	NA	-0.126249	NA
AACACACT	AGTGTGTT	4.4592	ACAAAACACACTGTCG	CGACAGTGTGTTTTGT	NA	CGCAAACACACTCATA	TATGAGTGTGTTTGCG	6.3195	AGTAAACACACTCATC	GATGAGTGTGTTTACT	1.97532	GCATAACACACTACTT	AAGTAGTGTGTTATGC	NA	GCAGAACACACTAGTA	TACTAGTGTGTTCTGC	NA	GTAAAACACACTTATA	TATAAGTGTGTTTTAC	2.90569	GCGAAACACACTTTCA	TGAAAGTGTGTTTCGC	0.934107	NA	1.16495	-0.691576	NA	NA	0.189047
AACACAGA	TCTGTGTT	4.30703	ACAAAACACAGAGTCG	CGACTCTGTGTTTTGT	NA	CGCAAACACAGACATA	TATGTCTGTGTTTGCG	6.34352	AGTAAACACAGACATC	GATGTCTGTGTTTACT	3.64808	GCATAACACAGAACTT	AAGTTCTGTGTTATGC	4.14443	GCAGAACACAGAAGTA	TACTTCTGTGTTCTGC	NA	GTAAAACACAGATATA	TATATCTGTGTTTTAC	NA	GCGAAACACAGATTCA	TGAATCTGTGTTTCGC	0.717271	NA	1.19322	0.998307	0.0724277	NA	NA
AACACAGC	GCTGTGTT	4.629	ACAAAACACAGCGTCG	CGACGCTGTGTTTTGT	NA	CGCAAACACAGCCATA	TATGGCTGTGTTTGCG	5.3164	AGTAAACACAGCCATC	GATGGCTGTGTTTACT	2.75607	GCATAACACAGCACTT	AAGTGCTGTGTTATGC	NA	GCAGAACACAGCAGTA	TACTGCTGTGTTCTGC	NA	GTAAAACACAGCTATA	TATAGCTGTGTTTTAC	NA	GCGAAACACAGCTTCA	TGAAGCTGTGTTTCGC	1.17608	NA	-0.0160928	0.0971691	NA	NA	NA
AACACAGG	CCTGTGTT	3.51428	ACAAAACACAGGGTCG	CGACCCTGTGTTTTGT	NA	CGCAAACACAGGCATA	TATGCCTGTGTTTGCG	5.61362	AGTAAACACAGGCATC	GATGCCTGTGTTTACT	NA	GCATAACACAGGACTT	AAGTCCTGTGTTATGC	2.58914	GCAGAACACAGGAGTA	TACTCCTGTGTTCTGC	NA	GTAAAACACAGGTATA	TATACCTGTGTTTTAC	1.43578	GCGAAACACAGGTTCA	TGAACCTGTGTTTCGC	-0.412404	NA	0.333856	NA	-1.22409	NA	-1.33669
AACACAGT	ACTGTGTT	4.16681	ACAAAACACAGTGTCG	CGACACTGTGTTTTGT	5.18222	CGCAAACACAGTCATA	TATGACTGTGTTTGCG	5.64831	AGTAAACACAGTCATC	GATGACTGTGTTTACT	2.2892	GCATAACACAGTACTT	AAGTACTGTGTTATGC	4.4346	GCAGAACACAGTAGTA	TACTACTGTGTTCTGC	2.98754	GTAAAACACAGTTATA	TATAACTGTGTTTTAC	3.32492	GCGAAACACAGTTTCA	TGAAACTGTGTTTCGC	0.51746	0.402626	0.374699	-0.374484	0.314314	0.151212	0.624194
AACACATA	TATGTGTT	3.74422	ACAAAACACATAGTCG	CGACTATGTGTTTTGT	NA	CGCAAACACATACATA	TATGTATGTGTTTGCG	6.18624	AGTAAACACATACATC	GATGTATGTGTTTACT	2.74302	GCATAACACATAACTT	AAGTTATGTGTTATGC	4.76907	GCAGAACACATAAGTA	TACTTATGTGTTCTGC	4.54536	GTAAAACACATATATA	TATATATGTGTTTTAC	2.02515	GCGAAACACATATTCA	TGAATATGTGTTTCGC	-0.0847319	NA	1.00805	0.0839841	0.593136	1.59952	-0.724933
AACACATC	GATGTGTT	4.41494	ACAAAACACATCGTCG	CGACGATGTGTTTTGT	NA	CGCAAACACATCCATA	TATGGATGTGTTTGCG	5.92653	AGTAAACACATCCATC	GATGGATGTGTTTACT	2.36767	GCATAACACATCACTT	AAGTGATGTGTTATGC	4.67184	GCAGAACACATCAGTA	TACTGATGTGTTCTGC	NA	GTAAAACACATCTATA	TATAGATGTGTTTTAC	NA	GCGAAACACATCTTCA	TGAAGATGTGTTTCGC	0.871034	NA	0.702272	-0.295201	0.512084	NA	NA
AACACATG	CATGTGTT	5.05267	ACAAAACACATGGTCG	CGACCATGTGTTTTGT	5.85341	CGCAAACACATGCATA	TATGCATGTGTTTGCG	6.11135	AGTAAACACATGCATC	GATGCATGTGTTTACT	4.199	GCATAACACATGACTT	AAGTCATGTGTTATGC	6.09107	GCAGAACACATGAGTA	TACTCATGTGTTCTGC	5.78072	GTAAAACACATGTATA	TATACATGTGTTTTAC	7.32613	GCGAAACACATGTTCA	TGAACATGTGTTTCGC	1.7798	1.29689	0.91987	1.55487	1.69517	2.74805	4.77737
AACACATT	AATGTGTT	4.6738	ACAAAACACATTGTCG	CGACAATGTGTTTTGT	NA	CGCAAACACATTCATA	TATGAATGTGTTTGCG	5.85927	AGTAAACACATTCATC	GATGAATGTGTTTACT	2.07754	GCATAACACATTACTT	AAGTAATGTGTTATGC	4.66566	GCAGAACACATTAGTA	TACTAATGTGTTCTGC	3.35537	GTAAAACACATTTATA	TATAAATGTGTTTTAC	3.15318	GCGAAACACATTTTCA	TGAAAATGTGTTTCGC	1.23992	NA	0.623076	-0.58831	0.506932	0.493182	0.445936
AACACCAA	TTGGTGTT	3.92709	ACAAAACACCAAGTCG	CGACTTGGTGTTTTGT	NA	CGCAAACACCAACATA	TATGTTGGTGTTTGCG	NA	AGTAAACACCAACATC	GATGTTGGTGTTTACT	NA	GCATAACACCAAACTT	AAGTTTGGTGTTATGC	0.874904	GCAGAACACCAAAGTA	TACTTTGGTGTTCTGC	NA	GTAAAACACCAATATA	TATATTGGTGTTTTAC	NA	GCGAAACACCAATTCA	TGAATTGGTGTTTCGC	0.175849	NA	NA	NA	-2.6531	NA	NA
AACACCAC	GTGGTGTT	4.99535	ACAAAACACCACGTCG	CGACGTGGTGTTTTGT	NA	CGCAAACACCACCATA	TATGGTGGTGTTTGCG	5.52798	AGTAAACACCACCATC	GATGGTGGTGTTTACT	3.27394	GCATAACACCACACTT	AAGTGTGGTGTTATGC	NA	GCAGAACACCACAGTA	TACTGTGGTGTTCTGC	NA	GTAAAACACCACTATA	TATAGTGGTGTTTTAC	NA	GCGAAACACCACTTCA	TGAAGTGGTGTTTCGC	1.69812	NA	0.233021	0.620339	NA	NA	NA
AACACCAG	CTGGTGTT	4.42423	ACAAAACACCAGGTCG	CGACCTGGTGTTTTGT	NA	CGCAAACACCAGCATA	TATGCTGGTGTTTGCG	5.33954	AGTAAACACCAGCATC	GATGCTGGTGTTTACT	1.96847	GCATAACACCAGACTT	AAGTCTGGTGTTATGC	3.98639	GCAGAACACCAGAGTA	TACTCTGGTGTTCTGC	3.17105	GTAAAACACCAGTATA	TATACTGGTGTTTTAC	NA	GCGAAACACCAGTTCA	TGAACTGGTGTTTCGC	0.884274	NA	0.0111523	-0.69849	-0.0593196	0.32182	NA
AACACCAT	ATGGTGTT	4.36613	ACAAAACACCATGTCG	CGACATGGTGTTTTGT	NA	CGCAAACACCATCATA	TATGATGGTGTTTGCG	5.46082	AGTAAACACCATCATC	GATGATGGTGTTTACT	2.55434	GCATAACACCATACTT	AAGTATGGTGTTATGC	NA	GCAGAACACCATAGTA	TACTATGGTGTTCTGC	NA	GTAAAACACCATTATA	TATAATGGTGTTTTAC	NA	GCGAAACACCATTTCA	TGAAATGGTGTTTCGC	0.801485	NA	0.153951	-0.106629	NA	NA	NA
AACACCCA	TGGGTGTT	4.14546	ACAAAACACCCAGTCG	CGACTGGGTGTTTTGT	NA	CGCAAACACCCACATA	TATGTGGGTGTTTGCG	5.88582	AGTAAACACCCACATC	GATGTGGGTGTTTACT	2.50499	GCATAACACCCAACTT	AAGTTGGGTGTTATGC	NA	GCAGAACACCCAAGTA	TACTTGGGTGTTCTGC	NA	GTAAAACACCCATATA	TATATGGGTGTTTTAC	NA	GCGAAACACCCATTCA	TGAATGGGTGTTTCGC	0.487027	NA	0.654336	-0.15648	NA	NA	NA
AACACCCC	GGGGTGTT	4.80205	ACAAAACACCCCGTCG	CGACGGGGTGTTTTGT	NA	CGCAAACACCCCCATA	TATGGGGGTGTTTGCG	6.20792	AGTAAACACCCCCATC	GATGGGGGTGTTTACT	3.81467	GCATAACACCCCACTT	AAGTGGGGTGTTATGC	3.96819	GCAGAACACCCCAGTA	TACTGGGGTGTTCTGC	NA	GTAAAACACCCCTATA	TATAGGGGTGTTTTAC	NA	GCGAAACACCCCTTCA	TGAAGGGGTGTTTCGC	1.42267	NA	1.03357	1.16661	-0.0744877	NA	NA
AACACCCG	CGGGTGTT	4.62789	ACAAAACACCCGGTCG	CGACCGGGTGTTTTGT	NA	CGCAAACACCCGCATA	TATGCGGGTGTTTGCG	6.1153	AGTAAACACCCGCATC	GATGCGGGTGTTTACT	3.50104	GCATAACACCCGACTT	AAGTCGGGTGTTATGC	4.66788	GCAGAACACCCGAGTA	TACTCGGGTGTTCTGC	2.99674	GTAAAACACCCGTATA	TATACGGGTGTTTTAC	NA	GCGAAACACCCGTTCA	TGAACGGGTGTTTCGC	1.1745	NA	0.92453	0.849764	0.508779	0.159759	NA
AACACCCT	AGGGTGTT	3.99636	ACAAAACACCCTGTCG	CGACAGGGTGTTTTGT	NA	CGCAAACACCCTCATA	TATGAGGGTGTTTGCG	6.25659	AGTAAACACCCTCATC	GATGAGGGTGTTTACT	3.18139	GCATAACACCCTACTT	AAGTAGGGTGTTATGC	4.01357	GCAGAACACCCTAGTA	TACTAGGGTGTTCTGC	NA	GTAAAACACCCTTATA	TATAAGGGTGTTTTAC	3.1051	GCGAAACACCCTTTCA	TGAAAGGGTGTTTCGC	0.274567	NA	1.09087	0.526846	-0.0366611	NA	0.396031
[truncated: 64,424 more rows]
