# Supplementary material for: Enhancers display constrained sequence flexibility and context-specific modulation of motif function
Source: HighWire-hosted journal article supplement (doi:10.1101/gr.277246.122), 2023-03-01
Supplement: Supplemental_Table_S4.xlsx [file Supplemental_Table_S4.xlsx]

## Sheet: Legend
Supplemental Table S4. Drosophila and human TF motif sequences used in the motif pasting experiments.
Drosophila and human TF motif sequences used in the motif pasting experiments.

## Sheet: Supplemental Table S4
Species	TF motif	PWM model	Collection name	Gene	Motif cluster name	Sequence used in motif pasting
Drosophila	Stat92E	bergman__Stat92E	bergman	Stat92E	STAT/2	TTTCCCGGAAA
Drosophila	Trl	flyfactorsurvey__Trl_FlyReg_FBgn0013263	flyfactorsurvey	Trl	Trl/1	GAGAGAG
Drosophila	Atf2	flyfactorsurvey__Atf-2_SANGER_5_FBgn0050420	flyfactorsurvey	Atf-2	CREB/ATF/2	ATCACGTCATC
Drosophila	SREBP	flyfactorsurvey__HLH106_SANGER_10_FBgn0015234	flyfactorsurvey	SREBP	Ebox/CACGTG/SREBP	ATCACGCGAC
Drosophila	ETS	flyfactorsurvey__Ets97D_SANGER_10_FBgn0004510	flyfactorsurvey	Ets97D	ETS/4	ACCGGAAGT
Drosophila	GATAA	flyfactorsurvey__srp_SANGER_5_FBgn0003507	flyfactorsurvey	srp	GATA/1	AGATAAGA
Drosophila	twist	flyfactorsurvey__twi_da_SANGER_5_FBgn0000413	flyfactorsurvey	twi	Ebox/CATATG/CATCTG	CCAGATGT
Drosophila	AP-1	flyfactorsurvey__kay_Jra_SANGER_5_FBgn0001291	flyfactorsurvey	kay/Jra	AP1/1	ATGAGTCAC
Human	AP-1	FOSL1_MA0477.1	Jaspar2018	FOSL1	AP1/1	GTGACTCAT
Human	P53	TP53_MA0106.3	Jaspar2018	TP53	P53-like/1	ACATGCCCGGGCATGT
Human	MAF	MAFK_MA0496.2	Jaspar2018	MAFK	MAF	TGCTGAGTCAGCA
Human	CREB1	CREB1_MA0018.3	Jaspar2018	CREB1	CREB/ATF/1	TGACGTCA
Human	ETS	ETS1_HUMAN.H11MO.0.A	HOCOMOCO_v11	ETS1	ETS/2	ACCGGAAGT
Human	EGR1	EGR1_C2H2_1	Taipale_Cell_2013	EGR1	EGR	ACGCCCACGCA
Human	MECP2	MECP2_HUMAN.H11MO.0.C	HOCOMOCO_v11	MECP2	MECP2	CCCGGAG
Human	E2F1	E2F1_HUMAN.H11MO.0.A	HOCOMOCO_v11	E2F1	E2F/2	GGCGGGAA
