# Supplementary material for: Enhancers display constrained sequence flexibility and context-specific modulation of motif function
Source: HighWire-hosted journal article supplement (doi:10.1101/gr.277246.122), 2023-03-01
Supplement: Supplemental_Table_S5.xlsx [file Supplemental_Table_S5.xlsx]

## Sheet: Legend
Supplemental Table S5. Results of motif-pasting experiment in Drosophila S2 enhancers.
Table with all oligos used in the analysis of Drosophila motif pasting with their DNA sequence, wild-type motif information, pasted motif information, activity of respective enhancer variant, of the original wild type or motif-mutant enhancer, and respective log2 fold-changes.

## Sheet: Supplemental Table S5
Oligo_ID	Sequence_ID	Strand	Sequence	Instance_ID	Wt_motif	Wt_motif_sequence	Motif_center	New_motif	New_motif_sequence	input_dev_rep1_UMI	input_dev_rep2_UMI	input_dev_rep3_UMI	STARRseq_dev_rep1_UMI	STARRseq_dev_rep2_UMI	STARRseq_dev_rep3_UMI	dev_activity	dev_wt_activity	dev_log2FC_wt_pasted	motif_mut_dev_activity	dev_log2FC_wt_mut	log2FC_mut_pasted
chr3R_23716086_23716334_+_dCP_twist_center243_to_GATAA	chr3R_23716086_23716334	-	ATCAAGCAGCTGCCTTATGTGCTTTAATTTTCTCTTTTTTTCATTTGACTACCCGACTTGAGCAATTTTCGGTATGCTTTTTTTTTGACTTTTTTTTTTGTTTCTCTTTATTTTATTTTTATTTTTTGACTTTATTTTTTTTTCTTTGGTTTATTTATCCAGAATCCAGGCTGTGTGTCTATGGATGTGGGCGTTTCGTCGGGTTATCAGTGCTCGCATAAATCTTTTATCAACCAGTCAGATAAGAGT	chr3R_23716086_23716334_+_dCP_twist_center243	twist	GCAGCTGT	243	GATAA	AGATAAGA	110	91	79	1	4	2	-0.251266	4.19099	-4.44226	-1.77661	-5.9676	1.52535
chr3R_23716086_23716334_+_dCP_twist_center243_to_AP1	chr3R_23716086_23716334	-	ATCAAGCAGCTGCCTTATGTGCTTTAATTTTCTCTTTTTTTCATTTGACTACCCGACTTGAGCAATTTTCGGTATGCTTTTTTTTTGACTTTTTTTTTTGTTTCTCTTTATTTTATTTTTATTTTTTGACTTTATTTTTTTTTCTTTGGTTTATTTATCCAGAATCCAGGCTGTGTGTCTATGGATGTGGGCGTTTCGTCGGGTTATCAGTGCTCGCATAAATCTTTTATCAACCAGTATGAGTCACGT	chr3R_23716086_23716334_+_dCP_twist_center243	twist	CGCAGCTGT	243	AP1	ATGAGTCAC	105	84	93	12	7	17	2.08417	4.19099	-2.10683	-1.77661	-5.9676	3.86078
chr3R_23716086_23716334_+_dCP_twist_center243_to_Trl	chr3R_23716086_23716334	-	ATCAAGCAGCTGCCTTATGTGCTTTAATTTTCTCTTTTTTTCATTTGACTACCCGACTTGAGCAATTTTCGGTATGCTTTTTTTTTGACTTTTTTTTTTGTTTCTCTTTATTTTATTTTTATTTTTTGACTTTATTTTTTTTTCTTTGGTTTATTTATCCAGAATCCAGGCTGTGTGTCTATGGATGTGGGCGTTTCGTCGGGTTATCAGTGCTCGCATAAATCTTTTATCAACCAGTCGAGAGAGTGT	chr3R_23716086_23716334_+_dCP_twist_center243	twist	GCAGCTG	243	Trl	GAGAGAG	114	93	101	2	5	4	0.2593	4.19099	-3.93169	-1.77661	-5.9676	2.03591
chr3R_23716086_23716334_+_dCP_twist_center243_to_ETS	chr3R_23716086_23716334	-	ATCAAGCAGCTGCCTTATGTGCTTTAATTTTCTCTTTTTTTCATTTGACTACCCGACTTGAGCAATTTTCGGTATGCTTTTTTTTTGACTTTTTTTTTTGTTTCTCTTTATTTTATTTTTATTTTTTGACTTTATTTTTTTTTCTTTGGTTTATTTATCCAGAATCCAGGCTGTGTGTCTATGGATGTGGGCGTTTCGTCGGGTTATCAGTGCTCGCATAAATCTTTTATCAACCAGTACCGGAAGTGT	chr3R_23716086_23716334_+_dCP_twist_center243	twist	CGCAGCTGT	243	ETS	ACCGGAAGT	168	159	143	76	85	68	4.0472	4.19099	-0.143795	-1.77661	-5.9676	5.82381
chr3R_23716086_23716334_+_dCP_twist_center243_to_SREBP	chr3R_23716086_23716334	-	ATCAAGCAGCTGCCTTATGTGCTTTAATTTTCTCTTTTTTTCATTTGACTACCCGACTTGAGCAATTTTCGGTATGCTTTTTTTTTGACTTTTTTTTTTGTTTCTCTTTATTTTATTTTTATTTTTTGACTTTATTTTTTTTTCTTTGGTTTATTTATCCAGAATCCAGGCTGTGTGTCTATGGATGTGGGCGTTTCGTCGGGTTATCAGTGCTCGCATAAATCTTTTATCAACCAGTATCACGCGACT	chr3R_23716086_23716334_+_dCP_twist_center243	twist	CGCAGCTGTG	243	SREBP	ATCACGCGAC	275	223	234	24	16	15	1.327	4.19099	-2.86399	-1.77661	-5.9676	3.10361
chr3R_23716086_23716334_+_dCP_twist_center243_to_Stat92E	chr3R_23716086_23716334	-	ATCAAGCAGCTGCCTTATGTGCTTTAATTTTCTCTTTTTTTCATTTGACTACCCGACTTGAGCAATTTTCGGTATGCTTTTTTTTTGACTTTTTTTTTTGTTTCTCTTTATTTTATTTTTATTTTTTGACTTTATTTTTTTTTCTTTGGTTTATTTATCCAGAATCCAGGCTGTGTGTCTATGGATGTGGGCGTTTCGTCGGGTTATCAGTGCTCGCATAAATCTTTTATCAACCAGTTTCCCGGAAAT	chr3R_23716086_23716334_+_dCP_twist_center243	twist	TCGCAGCTGTG	243	Stat92E	TTTCCCGGAAA	85	64	81	35	22	26	3.5869	4.19099	-0.604087	-1.77661	-5.9676	5.36352
chr3R_23716086_23716334_+_dCP_twist_center243_to_Atf2	chr3R_23716086_23716334	-	ATCAAGCAGCTGCCTTATGTGCTTTAATTTTCTCTTTTTTTCATTTGACTACCCGACTTGAGCAATTTTCGGTATGCTTTTTTTTTGACTTTTTTTTTTGTTTCTCTTTATTTTATTTTTATTTTTTGACTTTATTTTTTTTTCTTTGGTTTATTTATCCAGAATCCAGGCTGTGTGTCTATGGATGTGGGCGTTTCGTCGGGTTATCAGTGCTCGCATAAATCTTTTATCAACCAGATCACGTCATCT	chr3R_23716086_23716334_+_dCP_twist_center243	twist	TCGCAGCTGTG	243	Atf2	ATCACGTCATC	178	152	170	20	14	8	1.48874	4.19099	-2.70226	-1.77661	-5.9676	3.26535
chr2L_7136717_7136965_+_dCP_twist_center233_to_GATAA	chr2L_7136717_7136965	+	AAAGCAAATTGACTCGAGATAAAACTGCCACGGCCCAAGGCCAAAAACCCTATCCAAAAAAAAAATACACAAAAGGGTATCTAACCCCAGTTAAAGAGCAACGCAATTTCCGGTTGCCCCGCGGGGGTCACAGACAGAGATAGCTGACAACAGAGTGAGACGGATTGCTAGACAGCGAAAGGTAGGGGCCACATCCAGTCAGAATTCAAATATTTGTCATCATCAAATGAGATAAGATTGTCGTTAGCT	chr2L_7136717_7136965_+_dCP_twist_center233	twist	ACATCTGT	233	GATAA	AGATAAGA	35	25	30	9	12	9	3.48801	5.81291	-2.3249	0.634567	-5.17835	2.85345
chr2L_7136717_7136965_+_dCP_twist_center233_to_AP1	chr2L_7136717_7136965	+	AAAGCAAATTGACTCGAGATAAAACTGCCACGGCCCAAGGCCAAAAACCCTATCCAAAAAAAAAATACACAAAAGGGTATCTAACCCCAGTTAAAGAGCAACGCAATTTCCGGTTGCCCCGCGGGGGTCACAGACAGAGATAGCTGACAACAGAGTGAGACGGATTGCTAGACAGCGAAAGGTAGGGGCCACATCCAGTCAGAATTCAAATATTTGTCATCATCAAATATGAGTCACTTGTCGTTAGCT	chr2L_7136717_7136965_+_dCP_twist_center233	twist	GACATCTGT	233	AP1	ATGAGTCAC	122	94	108	62	58	59	4.21588	5.81291	-1.59704	0.634567	-5.17835	3.58131
chr2L_7136717_7136965_+_dCP_twist_center233_to_Trl	chr2L_7136717_7136965	+	AAAGCAAATTGACTCGAGATAAAACTGCCACGGCCCAAGGCCAAAAACCCTATCCAAAAAAAAAATACACAAAAGGGTATCTAACCCCAGTTAAAGAGCAACGCAATTTCCGGTTGCCCCGCGGGGGTCACAGACAGAGATAGCTGACAACAGAGTGAGACGGATTGCTAGACAGCGAAAGGTAGGGGCCACATCCAGTCAGAATTCAAATATTTGTCATCATCAAATGGAGAGAGTTTGTCGTTAGCT	chr2L_7136717_7136965_+_dCP_twist_center233	twist	ACATCTG	233	Trl	GAGAGAG	47	48	43	4	0	5	1.26311	5.81291	-4.5498	0.634567	-5.17835	0.628545
chr2L_7136717_7136965_+_dCP_twist_center233_to_ETS	chr2L_7136717_7136965	+	AAAGCAAATTGACTCGAGATAAAACTGCCACGGCCCAAGGCCAAAAACCCTATCCAAAAAAAAAATACACAAAAGGGTATCTAACCCCAGTTAAAGAGCAACGCAATTTCCGGTTGCCCCGCGGGGGTCACAGACAGAGATAGCTGACAACAGAGTGAGACGGATTGCTAGACAGCGAAAGGTAGGGGCCACATCCAGTCAGAATTCAAATATTTGTCATCATCAAATACCGGAAGTTTGTCGTTAGCT	chr2L_7136717_7136965_+_dCP_twist_center233	twist	GACATCTGT	233	ETS	ACCGGAAGT	41	33	31	16	10	13	3.62992	5.81291	-2.183	0.634567	-5.17835	2.99535
chr2L_7136717_7136965_+_dCP_twist_center233_to_SREBP	chr2L_7136717_7136965	+	AAAGCAAATTGACTCGAGATAAAACTGCCACGGCCCAAGGCCAAAAACCCTATCCAAAAAAAAAATACACAAAAGGGTATCTAACCCCAGTTAAAGAGCAACGCAATTTCCGGTTGCCCCGCGGGGGTCACAGACAGAGATAGCTGACAACAGAGTGAGACGGATTGCTAGACAGCGAAAGGTAGGGGCCACATCCAGTCAGAATTCAAATATTTGTCATCATCAAATATCACGCGACTGTCGTTAGCT	chr2L_7136717_7136965_+_dCP_twist_center233	twist	GACATCTGTT	233	SREBP	ATCACGCGAC	52	48	40	55	32	57	5.08868	5.81291	-0.724238	0.634567	-5.17835	4.45411
chr2L_7136717_7136965_+_dCP_twist_center233_to_Stat92E	chr2L_7136717_7136965	+	AAAGCAAATTGACTCGAGATAAAACTGCCACGGCCCAAGGCCAAAAACCCTATCCAAAAAAAAAATACACAAAAGGGTATCTAACCCCAGTTAAAGAGCAACGCAATTTCCGGTTGCCCCGCGGGGGTCACAGACAGAGATAGCTGACAACAGAGTGAGACGGATTGCTAGACAGCGAAAGGTAGGGGCCACATCCAGTCAGAATTCAAATATTTGTCATCATCAAATTTCCCGGAAATGTCGTTAGCT	chr2L_7136717_7136965_+_dCP_twist_center233	twist	TGACATCTGTT	233	Stat92E	TTTCCCGGAAA	21	29	23	4	1	0	1.44116	5.81291	-4.37176	0.634567	-5.17835	0.806592
chr2L_7136717_7136965_+_dCP_twist_center233_to_Atf2	chr2L_7136717_7136965	+	AAAGCAAATTGACTCGAGATAAAACTGCCACGGCCCAAGGCCAAAAACCCTATCCAAAAAAAAAATACACAAAAGGGTATCTAACCCCAGTTAAAGAGCAACGCAATTTCCGGTTGCCCCGCGGGGGTCACAGACAGAGATAGCTGACAACAGAGTGAGACGGATTGCTAGACAGCGAAAGGTAGGGGCCACATCCAGTCAGAATTCAAATATTTGTCATCATCAAAATCACGTCATCTGTCGTTAGCT	chr2L_7136717_7136965_+_dCP_twist_center233	twist	TGACATCTGTT	233	Atf2	ATCACGTCATC	29	23	24	4	6	8	2.98704	5.81291	-2.82588	0.634567	-5.17835	2.35247
chr3L_11615209_11615457_+_dCP_twist_center88_to_GATAA	chr3L_11615209_11615457	+	AGTCAATGTGCCTGTATCCGGCATCAATGGCAACTTTGACAGCCTCGGTGACCTGACCCTTGGGGCTCTGGAAGCAAATTAGCAAGATAAGATGTTAAAAAATGCAACAAATTGTAGTTATCATGTAGATTAGGCCTTTTCTAAATAACATTTATCGCACAATTCTGTTATCACAAGTTCTCTAATTGGCTTCCGCACTTTCAAGGGTTAATAAATTGTGTTGTGCTTAGAAATGGAAAGAAGCATTAA	chr3L_11615209_11615457_+_dCP_twist_center88	twist	ACATATGG	88	GATAA	AGATAAGA	29	30	31	10	4	8	3.01554	6.64524	-3.6297	1.31179	-5.33345	1.70375
chr3L_11615209_11615457_+_dCP_twist_center88_to_AP1	chr3L_11615209_11615457	+	AGTCAATGTGCCTGTATCCGGCATCAATGGCAACTTTGACAGCCTCGGTGACCTGACCCTTGGGGCTCTGGAAGCAAATTAGCATGAGTCACTGTTAAAAAATGCAACAAATTGTAGTTATCATGTAGATTAGGCCTTTTCTAAATAACATTTATCGCACAATTCTGTTATCACAAGTTCTCTAATTGGCTTCCGCACTTTCAAGGGTTAATAAATTGTGTTGTGCTTAGAAATGGAAAGAAGCATTAA	chr3L_11615209_11615457_+_dCP_twist_center88	twist	AACATATGG	88	AP1	ATGAGTCAC	89	72	86	33	21	26	3.42965	6.64524	-3.21559	1.31179	-5.33345	2.11786
chr3L_11615209_11615457_+_dCP_twist_center88_to_Trl	chr3L_11615209_11615457	+	AGTCAATGTGCCTGTATCCGGCATCAATGGCAACTTTGACAGCCTCGGTGACCTGACCCTTGGGGCTCTGGAAGCAAATTAGCAGAGAGAGGTGTTAAAAAATGCAACAAATTGTAGTTATCATGTAGATTAGGCCTTTTCTAAATAACATTTATCGCACAATTCTGTTATCACAAGTTCTCTAATTGGCTTCCGCACTTTCAAGGGTTAATAAATTGTGTTGTGCTTAGAAATGGAAAGAAGCATTAA	chr3L_11615209_11615457_+_dCP_twist_center88	twist	ACATATG	88	Trl	GAGAGAG	51	38	58	3	1	3	0.661113	6.64524	-5.98412	1.31179	-5.33345	-0.650676
chr3L_11615209_11615457_+_dCP_twist_center88_to_ETS	chr3L_11615209_11615457	+	AGTCAATGTGCCTGTATCCGGCATCAATGGCAACTTTGACAGCCTCGGTGACCTGACCCTTGGGGCTCTGGAAGCAAATTAGCACCGGAAGTTGTTAAAAAATGCAACAAATTGTAGTTATCATGTAGATTAGGCCTTTTCTAAATAACATTTATCGCACAATTCTGTTATCACAAGTTCTCTAATTGGCTTCCGCACTTTCAAGGGTTAATAAATTGTGTTGTGCTTAGAAATGGAAAGAAGCATTAA	chr3L_11615209_11615457_+_dCP_twist_center88	twist	AACATATGG	88	ETS	ACCGGAAGT	47	44	40	42	26	44	4.82445	6.64524	-1.82078	1.31179	-5.33345	3.51267
chr3L_11615209_11615457_+_dCP_twist_center88_to_SREBP	chr3L_11615209_11615457	+	AGTCAATGTGCCTGTATCCGGCATCAATGGCAACTTTGACAGCCTCGGTGACCTGACCCTTGGGGCTCTGGAAGCAAATTAGCATCACGCGACGTTAAAAAATGCAACAAATTGTAGTTATCATGTAGATTAGGCCTTTTCTAAATAACATTTATCGCACAATTCTGTTATCACAAGTTCTCTAATTGGCTTCCGCACTTTCAAGGGTTAATAAATTGTGTTGTGCTTAGAAATGGAAAGAAGCATTAA	chr3L_11615209_11615457_+_dCP_twist_center88	twist	AACATATGGT	88	SREBP	ATCACGCGAC	51	47	54	29	12	15	3.60345	6.64524	-3.04179	1.31179	-5.33345	2.29166
chr3L_11615209_11615457_+_dCP_twist_center88_to_Stat92E	chr3L_11615209_11615457	+	AGTCAATGTGCCTGTATCCGGCATCAATGGCAACTTTGACAGCCTCGGTGACCTGACCCTTGGGGCTCTGGAAGCAAATTAGTTTCCCGGAAAGTTAAAAAATGCAACAAATTGTAGTTATCATGTAGATTAGGCCTTTTCTAAATAACATTTATCGCACAATTCTGTTATCACAAGTTCTCTAATTGGCTTCCGCACTTTCAAGGGTTAATAAATTGTGTTGTGCTTAGAAATGGAAAGAAGCATTAA	chr3L_11615209_11615457_+_dCP_twist_center88	twist	CAACATATGGT	88	Stat92E	TTTCCCGGAAA	37	33	35	7	4	5	2.34176	6.64524	-4.30348	1.31179	-5.33345	1.02997
chr3L_11615209_11615457_+_dCP_twist_center88_to_Atf2	chr3L_11615209_11615457	+	AGTCAATGTGCCTGTATCCGGCATCAATGGCAACTTTGACAGCCTCGGTGACCTGACCCTTGGGGCTCTGGAAGCAAATTAGATCACGTCATCGTTAAAAAATGCAACAAATTGTAGTTATCATGTAGATTAGGCCTTTTCTAAATAACATTTATCGCACAATTCTGTTATCACAAGTTCTCTAATTGGCTTCCGCACTTTCAAGGGTTAATAAATTGTGTTGTGCTTAGAAATGGAAAGAAGCATTAA	chr3L_11615209_11615457_+_dCP_twist_center88	twist	CAACATATGGT	88	Atf2	ATCACGTCATC	80	49	64	26	20	26	3.64353	6.64524	-3.00171	1.31179	-5.33345	2.33174
chr3L_3310914_3311162_+_dCP_twist_center180_to_GATAA	chr3L_3310914_3311162	-	ATTTATACAGAATTTAATAGTATGCTGACACCATTGTAACATATTTTTTGGTTTTTTTTTTCTCAGGAATATAAACAAAACCAATCTCCAAGCCGCTTAATCATTCGATTGGTACTTTGCTTGTTATTTAAGCATGTAATGACTCATATAAATGAGTAGAGATTTTCGCTTGGCGAAGATAAGATTCAAAATTGATTCTATTGCAGCTTATCTTAGTAGTGTACATTCTGCAAACAATGTTATTTGATT	chr3L_3310914_3311162_+_dCP_twist_center180	twist	GCAGATGT	180	GATAA	AGATAAGA	23	30	21	0	1	2	0.843058	8.03326	-7.1902	2.64048	-5.39278	-1.79742
chr3L_3310914_3311162_+_dCP_twist_center180_to_AP1	chr3L_3310914_3311162	-	ATTTATACAGAATTTAATAGTATGCTGACACCATTGTAACATATTTTTTGGTTTTTTTTTTCTCAGGAATATAAACAAAACCAATCTCCAAGCCGCTTAATCATTCGATTGGTACTTTGCTTGTTATTTAAGCATGTAATGACTCATATAAATGAGTAGAGATTTTCGCTTGGCGATGAGTCACTTCAAAATTGATTCTATTGCAGCTTATCTTAGTAGTGTACATTCTGCAAACAATGTTATTTGATT	chr3L_3310914_3311162_+_dCP_twist_center180	twist	AGCAGATGT	180	AP1	ATGAGTCAC	37	25	32	58	59	57	5.96624	8.03326	-2.06701	2.64048	-5.39278	3.32576
chr3L_3310914_3311162_+_dCP_twist_center180_to_Trl	chr3L_3310914_3311162	-	ATTTATACAGAATTTAATAGTATGCTGACACCATTGTAACATATTTTTTGGTTTTTTTTTTCTCAGGAATATAAACAAAACCAATCTCCAAGCCGCTTAATCATTCGATTGGTACTTTGCTTGTTATTTAAGCATGTAATGACTCATATAAATGAGTAGAGATTTTCGCTTGGCGAGAGAGAGTTTCAAAATTGATTCTATTGCAGCTTATCTTAGTAGTGTACATTCTGCAAACAATGTTATTTGATT	chr3L_3310914_3311162_+_dCP_twist_center180	twist	GCAGATG	180	Trl	GAGAGAG	27	22	19	9	7	15	3.92468	8.03326	-4.10858	2.64048	-5.39278	1.2842
chr3L_3310914_3311162_+_dCP_twist_center180_to_ETS	chr3L_3310914_3311162	-	ATTTATACAGAATTTAATAGTATGCTGACACCATTGTAACATATTTTTTGGTTTTTTTTTTCTCAGGAATATAAACAAAACCAATCTCCAAGCCGCTTAATCATTCGATTGGTACTTTGCTTGTTATTTAAGCATGTAATGACTCATATAAATGAGTAGAGATTTTCGCTTGGCGACCGGAAGTTTCAAAATTGATTCTATTGCAGCTTATCTTAGTAGTGTACATTCTGCAAACAATGTTATTTGATT	chr3L_3310914_3311162_+_dCP_twist_center180	twist	AGCAGATGT	180	ETS	ACCGGAAGT	13	12	21	220	217	217	8.90476	8.03326	0.871506	2.64048	-5.39278	6.26428
chr3L_3310914_3311162_+_dCP_twist_center180_to_SREBP	chr3L_3310914_3311162	-	ATTTATACAGAATTTAATAGTATGCTGACACCATTGTAACATATTTTTTGGTTTTTTTTTTCTCAGGAATATAAACAAAACCAATCTCCAAGCCGCTTAATCATTCGATTGGTACTTTGCTTGTTATTTAAGCATGTAATGACTCATATAAATGAGTAGAGATTTTCGCTTGGCGATCACGCGACTCAAAATTGATTCTATTGCAGCTTATCTTAGTAGTGTACATTCTGCAAACAATGTTATTTGATT	chr3L_3310914_3311162_+_dCP_twist_center180	twist	AGCAGATGTT	180	SREBP	ATCACGCGAC	20	14	19	148	182	203	8.41708	8.03326	0.383819	2.64048	-5.39278	5.77659
chr3L_3310914_3311162_+_dCP_twist_center180_to_Stat92E	chr3L_3310914_3311162	-	ATTTATACAGAATTTAATAGTATGCTGACACCATTGTAACATATTTTTTGGTTTTTTTTTTCTCAGGAATATAAACAAAACCAATCTCCAAGCCGCTTAATCATTCGATTGGTACTTTGCTTGTTATTTAAGCATGTAATGACTCATATAAATGAGTAGAGATTTTCGCTTGGCTTTCCCGGAAATCAAAATTGATTCTATTGCAGCTTATCTTAGTAGTGTACATTCTGCAAACAATGTTATTTGATT	chr3L_3310914_3311162_+_dCP_twist_center180	twist	GAGCAGATGTT	180	Stat92E	TTTCCCGGAAA	23	24	31	12	22	31	4.80704	8.03326	-3.22622	2.64048	-5.39278	2.16655
chr3L_3310914_3311162_+_dCP_twist_center180_to_Atf2	chr3L_3310914_3311162	-	ATTTATACAGAATTTAATAGTATGCTGACACCATTGTAACATATTTTTTGGTTTTTTTTTTCTCAGGAATATAAACAAAACCAATCTCCAAGCCGCTTAATCATTCGATTGGTACTTTGCTTGTTATTTAAGCATGTAATGACTCATATAAATGAGTAGAGATTTTCGCTTGGCATCACGTCATCTCAAAATTGATTCTATTGCAGCTTATCTTAGTAGTGTACATTCTGCAAACAATGTTATTTGATT	chr3L_3310914_3311162_+_dCP_twist_center180	twist	GAGCAGATGTT	180	Atf2	ATCACGTCATC	31	25	26	39	55	47	5.8735	8.03326	-2.15976	2.64048	-5.39278	3.23302
chr2R_10983325_10983573_+_dCP_twist_center159_to_GATAA	chr2R_10983325_10983573	-	TGCTTTCTTAAGAATTGAGTCCATCAAAATTTGGAGGAATACAAATCTATACTCTCTTTTGTTAGCTGGTCTTTATCGATTCAACGGGAAGCTGAAAATATGCATACATATGTGATTATAAGCTGATTAAATCAATTGTTGGTATCGAATTATAAAGATAAGAGCCCAATTACCAGGATTTCTATGGATGAAACACGAATGCGTTTTTTAAGGATCATTTAATGAGCTATAACAATGGAAAAAAAGTAA	chr2R_10983325_10983573_+_dCP_twist_center159	twist	ACATGTGT	159	GATAA	AGATAAGA	NA	NA	NA	NA	NA	NA	NA	4.19786	NA	1.25155	-2.94631	NA
chr2R_10983325_10983573_+_dCP_twist_center159_to_AP1	chr2R_10983325_10983573	-	TGCTTTCTTAAGAATTGAGTCCATCAAAATTTGGAGGAATACAAATCTATACTCTCTTTTGTTAGCTGGTCTTTATCGATTCAACGGGAAGCTGAAAATATGCATACATATGTGATTATAAGCTGATTAAATCAATTGTTGGTATCGAATTATAATGAGTCACGCCCAATTACCAGGATTTCTATGGATGAAACACGAATGCGTTTTTTAAGGATCATTTAATGAGCTATAACAATGGAAAAAAAGTAA	chr2R_10983325_10983573_+_dCP_twist_center159	twist	AACATGTGT	159	AP1	ATGAGTCAC	11	10	12	1	0	1	1.59854	4.19786	-2.59932	1.25155	-2.94631	0.346997
chr2R_10983325_10983573_+_dCP_twist_center159_to_Trl	chr2R_10983325_10983573	-	TGCTTTCTTAAGAATTGAGTCCATCAAAATTTGGAGGAATACAAATCTATACTCTCTTTTGTTAGCTGGTCTTTATCGATTCAACGGGAAGCTGAAAATATGCATACATATGTGATTATAAGCTGATTAAATCAATTGTTGGTATCGAATTATAAGAGAGAGTGCCCAATTACCAGGATTTCTATGGATGAAACACGAATGCGTTTTTTAAGGATCATTTAATGAGCTATAACAATGGAAAAAAAGTAA	chr2R_10983325_10983573_+_dCP_twist_center159	twist	ACATGTG	159	Trl	GAGAGAG	NA	NA	NA	NA	NA	NA	NA	4.19786	NA	1.25155	-2.94631	NA
chr2R_10983325_10983573_+_dCP_twist_center159_to_ETS	chr2R_10983325_10983573	-	TGCTTTCTTAAGAATTGAGTCCATCAAAATTTGGAGGAATACAAATCTATACTCTCTTTTGTTAGCTGGTCTTTATCGATTCAACGGGAAGCTGAAAATATGCATACATATGTGATTATAAGCTGATTAAATCAATTGTTGGTATCGAATTATAACCGGAAGTGCCCAATTACCAGGATTTCTATGGATGAAACACGAATGCGTTTTTTAAGGATCATTTAATGAGCTATAACAATGGAAAAAAAGTAA	chr2R_10983325_10983573_+_dCP_twist_center159	twist	AACATGTGT	159	ETS	ACCGGAAGT	28	22	14	3	2	8	2.75962	4.19786	-1.43824	1.25155	-2.94631	1.50808
chr2R_10983325_10983573_+_dCP_twist_center159_to_SREBP	chr2R_10983325_10983573	-	TGCTTTCTTAAGAATTGAGTCCATCAAAATTTGGAGGAATACAAATCTATACTCTCTTTTGTTAGCTGGTCTTTATCGATTCAACGGGAAGCTGAAAATATGCATACATATGTGATTATAAGCTGATTAAATCAATTGTTGGTATCGAATTATAATCACGCGACCCCAATTACCAGGATTTCTATGGATGAAACACGAATGCGTTTTTTAAGGATCATTTAATGAGCTATAACAATGGAAAAAAAGTAA	chr2R_10983325_10983573_+_dCP_twist_center159	twist	AACATGTGTG	159	SREBP	ATCACGCGAC	48	37	47	2	5	5	1.60708	4.19786	-2.59078	1.25155	-2.94631	0.35553
chr2R_10983325_10983573_+_dCP_twist_center159_to_Stat92E	chr2R_10983325_10983573	-	TGCTTTCTTAAGAATTGAGTCCATCAAAATTTGGAGGAATACAAATCTATACTCTCTTTTGTTAGCTGGTCTTTATCGATTCAACGGGAAGCTGAAAATATGCATACATATGTGATTATAAGCTGATTAAATCAATTGTTGGTATCGAATTATTTTCCCGGAAACCCAATTACCAGGATTTCTATGGATGAAACACGAATGCGTTTTTTAAGGATCATTTAATGAGCTATAACAATGGAAAAAAAGTAA	chr2R_10983325_10983573_+_dCP_twist_center159	twist	AAACATGTGTG	159	Stat92E	TTTCCCGGAAA	14	12	17	1	4	0	2.22755	4.19786	-1.97031	1.25155	-2.94631	0.976
chr2R_10983325_10983573_+_dCP_twist_center159_to_Atf2	chr2R_10983325_10983573	-	TGCTTTCTTAAGAATTGAGTCCATCAAAATTTGGAGGAATACAAATCTATACTCTCTTTTGTTAGCTGGTCTTTATCGATTCAACGGGAAGCTGAAAATATGCATACATATGTGATTATAAGCTGATTAAATCAATTGTTGGTATCGAATTATATCACGTCATCCCCAATTACCAGGATTTCTATGGATGAAACACGAATGCGTTTTTTAAGGATCATTTAATGAGCTATAACAATGGAAAAAAAGTAA	chr2R_10983325_10983573_+_dCP_twist_center159	twist	AAACATGTGTG	159	Atf2	ATCACGTCATC	25	23	19	3	1	2	1.57486	4.19786	-2.623	1.25155	-2.94631	0.323314
chr3L_14541284_14541532_+_dCP_twist_center138_to_GATAA	chr3L_14541284_14541532	-	TCAAGCACTAAATATGCTGATATTGTCTCCAGACAGCGCCAATTAGCCAAAAAAAGTTGATGATAACAGCAGAGCAGACGGAAATGTTCCCATAGCCAGGCCCACGCCGAAAAAGACGTATCAGCATGCCGTCAAGATAAGATTAGCATGCAAAAGTCCACGCGAACCCCATTGAACGATCCTTATCAACCATTGACTTTTAGTTTTATGAATGTCTAGCCGAAAAATTATGATAACTACAAATGGGAT	chr3L_14541284_14541532_+_dCP_twist_center138	twist	ACATATGT	138	GATAA	AGATAAGA	43	46	45	6	4	0	1.44943	7.8931	-6.44367	3.06118	-4.83192	-1.61175
chr3L_14541284_14541532_+_dCP_twist_center138_to_AP1	chr3L_14541284_14541532	-	TCAAGCACTAAATATGCTGATATTGTCTCCAGACAGCGCCAATTAGCCAAAAAAAGTTGATGATAACAGCAGAGCAGACGGAAATGTTCCCATAGCCAGGCCCACGCCGAAAAAGACGTATCAGCATGCCGTCATGAGTCACTTAGCATGCAAAAGTCCACGCGAACCCCATTGAACGATCCTTATCAACCATTGACTTTTAGTTTTATGAATGTCTAGCCGAAAAATTATGATAACTACAAATGGGAT	chr3L_14541284_14541532_+_dCP_twist_center138	twist	AACATATGT	138	AP1	ATGAGTCAC	64	53	64	154	85	90	5.91081	7.8931	-1.98228	3.06118	-4.83192	2.84964
chr3L_14541284_14541532_+_dCP_twist_center138_to_Trl	chr3L_14541284_14541532	-	TCAAGCACTAAATATGCTGATATTGTCTCCAGACAGCGCCAATTAGCCAAAAAAAGTTGATGATAACAGCAGAGCAGACGGAAATGTTCCCATAGCCAGGCCCACGCCGAAAAAGACGTATCAGCATGCCGTCAGAGAGAGTTTAGCATGCAAAAGTCCACGCGAACCCCATTGAACGATCCTTATCAACCATTGACTTTTAGTTTTATGAATGTCTAGCCGAAAAATTATGATAACTACAAATGGGAT	chr3L_14541284_14541532_+_dCP_twist_center138	twist	ACATATG	138	Trl	GAGAGAG	32	14	21	12	4	9	3.63507	7.8931	-4.25803	3.06118	-4.83192	0.573889
chr3L_14541284_14541532_+_dCP_twist_center138_to_ETS	chr3L_14541284_14541532	-	TCAAGCACTAAATATGCTGATATTGTCTCCAGACAGCGCCAATTAGCCAAAAAAAGTTGATGATAACAGCAGAGCAGACGGAAATGTTCCCATAGCCAGGCCCACGCCGAAAAAGACGTATCAGCATGCCGTCACCGGAAGTTTAGCATGCAAAAGTCCACGCGAACCCCATTGAACGATCCTTATCAACCATTGACTTTTAGTTTTATGAATGTCTAGCCGAAAAATTATGATAACTACAAATGGGAT	chr3L_14541284_14541532_+_dCP_twist_center138	twist	AACATATGT	138	ETS	ACCGGAAGT	24	12	12	117	82	85	7.63468	7.8931	-0.258414	3.06118	-4.83192	4.57351
chr3L_14541284_14541532_+_dCP_twist_center138_to_SREBP	chr3L_14541284_14541532	-	TCAAGCACTAAATATGCTGATATTGTCTCCAGACAGCGCCAATTAGCCAAAAAAAGTTGATGATAACAGCAGAGCAGACGGAAATGTTCCCATAGCCAGGCCCACGCCGAAAAAGACGTATCAGCATGCCGTCATCACGCGACTAGCATGCAAAAGTCCACGCGAACCCCATTGAACGATCCTTATCAACCATTGACTTTTAGTTTTATGAATGTCTAGCCGAAAAATTATGATAACTACAAATGGGAT	chr3L_14541284_14541532_+_dCP_twist_center138	twist	AACATATGTT	138	SREBP	ATCACGCGAC	37	59	56	153	76	106	6.16325	7.8931	-1.72985	3.06118	-4.83192	3.10207
chr3L_14541284_14541532_+_dCP_twist_center138_to_Stat92E	chr3L_14541284_14541532	-	TCAAGCACTAAATATGCTGATATTGTCTCCAGACAGCGCCAATTAGCCAAAAAAAGTTGATGATAACAGCAGAGCAGACGGAAATGTTCCCATAGCCAGGCCCACGCCGAAAAAGACGTATCAGCATGCCGTTTTCCCGGAAATAGCATGCAAAAGTCCACGCGAACCCCATTGAACGATCCTTATCAACCATTGACTTTTAGTTTTATGAATGTCTAGCCGAAAAATTATGATAACTACAAATGGGAT	chr3L_14541284_14541532_+_dCP_twist_center138	twist	CAACATATGTT	138	Stat92E	TTTCCCGGAAA	64	69	86	179	87	127	5.87198	7.8931	-2.02112	3.06118	-4.83192	2.8108
chr3L_14541284_14541532_+_dCP_twist_center138_to_Atf2	chr3L_14541284_14541532	-	TCAAGCACTAAATATGCTGATATTGTCTCCAGACAGCGCCAATTAGCCAAAAAAAGTTGATGATAACAGCAGAGCAGACGGAAATGTTCCCATAGCCAGGCCCACGCCGAAAAAGACGTATCAGCATGCCGTATCACGTCATCTAGCATGCAAAAGTCCACGCGAACCCCATTGAACGATCCTTATCAACCATTGACTTTTAGTTTTATGAATGTCTAGCCGAAAAATTATGATAACTACAAATGGGAT	chr3L_14541284_14541532_+_dCP_twist_center138	twist	CAACATATGTT	138	Atf2	ATCACGTCATC	72	65	62	11	8	9	2.22959	7.8931	-5.66351	3.06118	-4.83192	-0.83159
chr2L_21930866_21931114_+_dCP_twist_center143_to_GATAA	chr2L_21930866_21931114	-	ATTTAGAGGCGCAAGTGTTTATTTCTACTGATTACATGCCGCCGCATCTTTGTGCTATCGCTTTGCACTTAGTAAATATAAATTGCAAGAAATTTTCCATGTATTTGTTCTTTTAAACGGCTGATGAAATTATAGGAGCAGATAAGAATTTAATTAAATAGCTCTCTTGTGTGGCGGTTCGACTGAAATGACTTCGGGATAAGACTCAATGTGTCATCAAAGAACGACGAAACGAATTGTTGGCCAAAT	chr2L_21930866_21931114_+_dCP_twist_center143	twist	CCATATGT	143	GATAA	AGATAAGA	42	33	42	10	4	5	2.4309	3.41395	-0.983055	1.74944	-1.66451	0.681458
chr2L_21930866_21931114_+_dCP_twist_center143_to_AP1	chr2L_21930866_21931114	-	ATTTAGAGGCGCAAGTGTTTATTTCTACTGATTACATGCCGCCGCATCTTTGTGCTATCGCTTTGCACTTAGTAAATATAAATTGCAAGAAATTTTCCATGTATTTGTTCTTTTAAACGGCTGATGAAATTATAGGAGATGAGTCACATTTAATTAAATAGCTCTCTTGTGTGGCGGTTCGACTGAAATGACTTCGGGATAAGACTCAATGTGTCATCAAAGAACGACGAAACGAATTGTTGGCCAAAT	chr2L_21930866_21931114_+_dCP_twist_center143	twist	CCCATATGT	143	AP1	ATGAGTCAC	101	55	74	15	7	17	2.49819	3.41395	-0.915758	1.74944	-1.66451	0.748754
chr2L_21930866_21931114_+_dCP_twist_center143_to_Trl	chr2L_21930866_21931114	-	ATTTAGAGGCGCAAGTGTTTATTTCTACTGATTACATGCCGCCGCATCTTTGTGCTATCGCTTTGCACTTAGTAAATATAAATTGCAAGAAATTTTCCATGTATTTGTTCTTTTAAACGGCTGATGAAATTATAGGAGCGAGAGAGTATTTAATTAAATAGCTCTCTTGTGTGGCGGTTCGACTGAAATGACTTCGGGATAAGACTCAATGTGTCATCAAAGAACGACGAAACGAATTGTTGGCCAAAT	chr2L_21930866_21931114_+_dCP_twist_center143	twist	CCATATG	143	Trl	GAGAGAG	57	27	49	6	2	3	1.46591	3.41395	-1.94804	1.74944	-1.66451	-0.283527
chr2L_21930866_21931114_+_dCP_twist_center143_to_ETS	chr2L_21930866_21931114	-	ATTTAGAGGCGCAAGTGTTTATTTCTACTGATTACATGCCGCCGCATCTTTGTGCTATCGCTTTGCACTTAGTAAATATAAATTGCAAGAAATTTTCCATGTATTTGTTCTTTTAAACGGCTGATGAAATTATAGGAGACCGGAAGTATTTAATTAAATAGCTCTCTTGTGTGGCGGTTCGACTGAAATGACTTCGGGATAAGACTCAATGTGTCATCAAAGAACGACGAAACGAATTGTTGGCCAAAT	chr2L_21930866_21931114_+_dCP_twist_center143	twist	CCCATATGT	143	ETS	ACCGGAAGT	43	32	27	4	6	9	2.64426	3.41395	-0.769689	1.74944	-1.66451	0.894823
chr2L_21930866_21931114_+_dCP_twist_center143_to_SREBP	chr2L_21930866_21931114	-	ATTTAGAGGCGCAAGTGTTTATTTCTACTGATTACATGCCGCCGCATCTTTGTGCTATCGCTTTGCACTTAGTAAATATAAATTGCAAGAAATTTTCCATGTATTTGTTCTTTTAAACGGCTGATGAAATTATAGGAGATCACGCGACTTTAATTAAATAGCTCTCTTGTGTGGCGGTTCGACTGAAATGACTTCGGGATAAGACTCAATGTGTCATCAAAGAACGACGAAACGAATTGTTGGCCAAAT	chr2L_21930866_21931114_+_dCP_twist_center143	twist	CCCATATGTA	143	SREBP	ATCACGCGAC	106	86	90	17	11	20	2.5016	3.41395	-0.912347	1.74944	-1.66451	0.752165
chr2L_21930866_21931114_+_dCP_twist_center143_to_Stat92E	chr2L_21930866_21931114	-	ATTTAGAGGCGCAAGTGTTTATTTCTACTGATTACATGCCGCCGCATCTTTGTGCTATCGCTTTGCACTTAGTAAATATAAATTGCAAGAAATTTTCCATGTATTTGTTCTTTTAAACGGCTGATGAAATTATAGGATTTCCCGGAAATTTAATTAAATAGCTCTCTTGTGTGGCGGTTCGACTGAAATGACTTCGGGATAAGACTCAATGTGTCATCAAAGAACGACGAAACGAATTGTTGGCCAAAT	chr2L_21930866_21931114_+_dCP_twist_center143	twist	GCCCATATGTA	143	Stat92E	TTTCCCGGAAA	35	33	44	2	0	9	1.82211	3.41395	-1.59184	1.74944	-1.66451	0.0726747
chr2L_21930866_21931114_+_dCP_twist_center143_to_Atf2	chr2L_21930866_21931114	-	ATTTAGAGGCGCAAGTGTTTATTTCTACTGATTACATGCCGCCGCATCTTTGTGCTATCGCTTTGCACTTAGTAAATATAAATTGCAAGAAATTTTCCATGTATTTGTTCTTTTAAACGGCTGATGAAATTATAGGAATCACGTCATCTTTAATTAAATAGCTCTCTTGTGTGGCGGTTCGACTGAAATGACTTCGGGATAAGACTCAATGTGTCATCAAAGAACGACGAAACGAATTGTTGGCCAAAT	chr2L_21930866_21931114_+_dCP_twist_center143	twist	GCCCATATGTA	143	Atf2	ATCACGTCATC	37	31	40	2	4	4	1.62965	3.41395	-1.7843	1.74944	-1.66451	-0.119783
chr2L_13570040_13570288_+_dCP_twist_center116_to_GATAA	chr2L_13570040_13570288	-	CGTCGTCAGAAAGAAACGACAAGAAAAATCAATTTAAATGATTACAAATTGAAGGAGACAAATAGTCGGAGCGACGTCGGGCGAAGACAACGATTTTAAGCTACAAGACATGAGATAAGATTACCCCGAATGTACTGAGAACAATTGATATGAAGCATATGTGGAAAATATGTGCTAATGACAAATATATAAGAGATAAAGATTTCGTTCCTTTCTCGTTTCGTTTGGTTAACTTAAATTCATTCAATT	chr2L_13570040_13570288_+_dCP_twist_center116	twist	CCAGATGT	116	GATAA	AGATAAGA	30	29	33	7	11	13	3.49534	7.81709	-4.32175	1.48648	-6.33061	2.00886
chr2L_13570040_13570288_+_dCP_twist_center116_to_AP1	chr2L_13570040_13570288	-	CGTCGTCAGAAAGAAACGACAAGAAAAATCAATTTAAATGATTACAAATTGAAGGAGACAAATAGTCGGAGCGACGTCGGGCGAAGACAACGATTTTAAGCTACAAGACATATGAGTCACTTACCCCGAATGTACTGAGAACAATTGATATGAAGCATATGTGGAAAATATGTGCTAATGACAAATATATAAGAGATAAAGATTTCGTTCCTTTCTCGTTTCGTTTGGTTAACTTAAATTCATTCAATT	chr2L_13570040_13570288_+_dCP_twist_center116	twist	GCCAGATGT	116	AP1	ATGAGTCAC	26	22	19	40	43	47	6.02988	7.81709	-1.78722	1.48648	-6.33061	4.54339
chr2L_13570040_13570288_+_dCP_twist_center116_to_Trl	chr2L_13570040_13570288	-	CGTCGTCAGAAAGAAACGACAAGAAAAATCAATTTAAATGATTACAAATTGAAGGAGACAAATAGTCGGAGCGACGTCGGGCGAAGACAACGATTTTAAGCTACAAGACATGGAGAGAGTTTACCCCGAATGTACTGAGAACAATTGATATGAAGCATATGTGGAAAATATGTGCTAATGACAAATATATAAGAGATAAAGATTTCGTTCCTTTCTCGTTTCGTTTGGTTAACTTAAATTCATTCAATT	chr2L_13570040_13570288_+_dCP_twist_center116	twist	CCAGATG	116	Trl	GAGAGAG	27	22	23	6	10	2	3.08032	7.81709	-4.73677	1.48648	-6.33061	1.59384
chr2L_13570040_13570288_+_dCP_twist_center116_to_ETS	chr2L_13570040_13570288	-	CGTCGTCAGAAAGAAACGACAAGAAAAATCAATTTAAATGATTACAAATTGAAGGAGACAAATAGTCGGAGCGACGTCGGGCGAAGACAACGATTTTAAGCTACAAGACATACCGGAAGTTTACCCCGAATGTACTGAGAACAATTGATATGAAGCATATGTGGAAAATATGTGCTAATGACAAATATATAAGAGATAAAGATTTCGTTCCTTTCTCGTTTCGTTTGGTTAACTTAAATTCATTCAATT	chr2L_13570040_13570288_+_dCP_twist_center116	twist	GCCAGATGT	116	ETS	ACCGGAAGT	23	18	23	257	230	277	8.6463	7.81709	0.829203	1.48648	-6.33061	7.15981
chr2L_13570040_13570288_+_dCP_twist_center116_to_SREBP	chr2L_13570040_13570288	-	CGTCGTCAGAAAGAAACGACAAGAAAAATCAATTTAAATGATTACAAATTGAAGGAGACAAATAGTCGGAGCGACGTCGGGCGAAGACAACGATTTTAAGCTACAAGACATATCACGCGACTACCCCGAATGTACTGAGAACAATTGATATGAAGCATATGTGGAAAATATGTGCTAATGACAAATATATAAGAGATAAAGATTTCGTTCCTTTCTCGTTTCGTTTGGTTAACTTAAATTCATTCAATT	chr2L_13570040_13570288_+_dCP_twist_center116	twist	GCCAGATGTT	116	SREBP	ATCACGCGAC	43	38	36	142	87	122	6.63521	7.81709	-1.18188	1.48648	-6.33061	5.14873
chr2L_13570040_13570288_+_dCP_twist_center116_to_Stat92E	chr2L_13570040_13570288	-	CGTCGTCAGAAAGAAACGACAAGAAAAATCAATTTAAATGATTACAAATTGAAGGAGACAAATAGTCGGAGCGACGTCGGGCGAAGACAACGATTTTAAGCTACAAGACATTTCCCGGAAATACCCCGAATGTACTGAGAACAATTGATATGAAGCATATGTGGAAAATATGTGCTAATGACAAATATATAAGAGATAAAGATTTCGTTCCTTTCTCGTTTCGTTTGGTTAACTTAAATTCATTCAATT	chr2L_13570040_13570288_+_dCP_twist_center116	twist	TGCCAGATGTT	116	Stat92E	TTTCCCGGAAA	99	58	72	207	174	240	6.51046	7.81709	-1.30663	1.48648	-6.33061	5.02398
chr2L_13570040_13570288_+_dCP_twist_center116_to_Atf2	chr2L_13570040_13570288	-	CGTCGTCAGAAAGAAACGACAAGAAAAATCAATTTAAATGATTACAAATTGAAGGAGACAAATAGTCGGAGCGACGTCGGGCGAAGACAACGATTTTAAGCTACAAGACAATCACGTCATCTACCCCGAATGTACTGAGAACAATTGATATGAAGCATATGTGGAAAATATGTGCTAATGACAAATATATAAGAGATAAAGATTTCGTTCCTTTCTCGTTTCGTTTGGTTAACTTAAATTCATTCAATT	chr2L_13570040_13570288_+_dCP_twist_center116	twist	TGCCAGATGTT	116	Atf2	ATCACGTCATC	NA	NA	NA	NA	NA	NA	NA	7.81709	NA	1.48648	-6.33061	NA
chr2R_18554050_18554298_+_dCP_twist_center75_to_GATAA	chr2R_18554050_18554298	-	CAGATAAGAATGATTAGCTGAGTCAAGAGCAGTTATTGTACTTTACTTATTTATTTTATTAATAATATTCTAGATAAGAGCATACATTTAATCAAATTATTGAAGTCTTTAGAATTTGCATTACTCATCCAAATTATCACTAACATTTTTATTTATCGGTTGTCCGCAGCAACAAAAGGATCTAAAATAAGACAAACTTGAAACTGTATTTCATCTGGACGAAGGCAATCTTAGCTCAAGAATAACATA	chr2R_18554050_18554298_+_dCP_twist_center75	twist	ACATATGT	75	GATAA	AGATAAGA	23	18	28	44	23	38	5.65061	8.01775	-2.36714	4.55726	-3.46049	1.09335
chr2R_18554050_18554298_+_dCP_twist_center75_to_AP1	chr2R_18554050_18554298	-	CAGATAAGAATGATTAGCTGAGTCAAGAGCAGTTATTGTACTTTACTTATTTATTTTATTAATAATATTCATGAGTCACGCATACATTTAATCAAATTATTGAAGTCTTTAGAATTTGCATTACTCATCCAAATTATCACTAACATTTTTATTTATCGGTTGTCCGCAGCAACAAAAGGATCTAAAATAAGACAAACTTGAAACTGTATTTCATCTGGACGAAGGCAATCTTAGCTCAAGAATAACATA	chr2R_18554050_18554298_+_dCP_twist_center75	twist	TACATATGT	75	AP1	ATGAGTCAC	20	12	16	83	72	109	7.52318	8.01775	-0.494572	4.55726	-3.46049	2.96592
chr2R_18554050_18554298_+_dCP_twist_center75_to_Trl	chr2R_18554050_18554298	-	CAGATAAGAATGATTAGCTGAGTCAAGAGCAGTTATTGTACTTTACTTATTTATTTTATTAATAATATTCTGAGAGAGTGCATACATTTAATCAAATTATTGAAGTCTTTAGAATTTGCATTACTCATCCAAATTATCACTAACATTTTTATTTATCGGTTGTCCGCAGCAACAAAAGGATCTAAAATAAGACAAACTTGAAACTGTATTTCATCTGGACGAAGGCAATCTTAGCTCAAGAATAACATA	chr2R_18554050_18554298_+_dCP_twist_center75	twist	ACATATG	75	Trl	GAGAGAG	11	10	19	23	28	38	6.21907	8.01775	-1.79868	4.55726	-3.46049	1.66181
chr2R_18554050_18554298_+_dCP_twist_center75_to_ETS	chr2R_18554050_18554298	-	CAGATAAGAATGATTAGCTGAGTCAAGAGCAGTTATTGTACTTTACTTATTTATTTTATTAATAATATTCACCGGAAGTGCATACATTTAATCAAATTATTGAAGTCTTTAGAATTTGCATTACTCATCCAAATTATCACTAACATTTTTATTTATCGGTTGTCCGCAGCAACAAAAGGATCTAAAATAAGACAAACTTGAAACTGTATTTCATCTGGACGAAGGCAATCTTAGCTCAAGAATAACATA	chr2R_18554050_18554298_+_dCP_twist_center75	twist	TACATATGT	75	ETS	ACCGGAAGT	NA	NA	NA	NA	NA	NA	NA	8.01775	NA	4.55726	-3.46049	NA
chr2R_18554050_18554298_+_dCP_twist_center75_to_SREBP	chr2R_18554050_18554298	-	CAGATAAGAATGATTAGCTGAGTCAAGAGCAGTTATTGTACTTTACTTATTTATTTTATTAATAATATTCATCACGCGACCATACATTTAATCAAATTATTGAAGTCTTTAGAATTTGCATTACTCATCCAAATTATCACTAACATTTTTATTTATCGGTTGTCCGCAGCAACAAAAGGATCTAAAATAAGACAAACTTGAAACTGTATTTCATCTGGACGAAGGCAATCTTAGCTCAAGAATAACATA	chr2R_18554050_18554298_+_dCP_twist_center75	twist	TACATATGTG	75	SREBP	ATCACGCGAC	NA	NA	NA	NA	NA	NA	NA	8.01775	NA	4.55726	-3.46049	NA
chr2R_18554050_18554298_+_dCP_twist_center75_to_Stat92E	chr2R_18554050_18554298	-	CAGATAAGAATGATTAGCTGAGTCAAGAGCAGTTATTGTACTTTACTTATTTATTTTATTAATAATATTTTTCCCGGAAACATACATTTAATCAAATTATTGAAGTCTTTAGAATTTGCATTACTCATCCAAATTATCACTAACATTTTTATTTATCGGTTGTCCGCAGCAACAAAAGGATCTAAAATAAGACAAACTTGAAACTGTATTTCATCTGGACGAAGGCAATCTTAGCTCAAGAATAACATA	chr2R_18554050_18554298_+_dCP_twist_center75	twist	CTACATATGTG	75	Stat92E	TTTCCCGGAAA	14	24	18	208	162	179	8.35037	8.01775	0.332617	4.55726	-3.46049	3.79311
chr2R_18554050_18554298_+_dCP_twist_center75_to_Atf2	chr2R_18554050_18554298	-	CAGATAAGAATGATTAGCTGAGTCAAGAGCAGTTATTGTACTTTACTTATTTATTTTATTAATAATATTATCACGTCATCCATACATTTAATCAAATTATTGAAGTCTTTAGAATTTGCATTACTCATCCAAATTATCACTAACATTTTTATTTATCGGTTGTCCGCAGCAACAAAAGGATCTAAAATAAGACAAACTTGAAACTGTATTTCATCTGGACGAAGGCAATCTTAGCTCAAGAATAACATA	chr2R_18554050_18554298_+_dCP_twist_center75	twist	CTACATATGTG	75	Atf2	ATCACGTCATC	NA	NA	NA	NA	NA	NA	NA	8.01775	NA	4.55726	-3.46049	NA
chrX_9273894_9274142_+_dCP_twist_center127_to_GATAA	chrX_9273894_9274142	-	GTGGCAAGATGGGGTCTTAGTCATGTAGATAGTCCACACACTGGGGTATCTGGGGAGTCAGCGTAGTCATAGCAATGAACATTTCATATATATATATATATATATGGATATATACATACATTCAGATAAGATTGCAATTAAAATCAGAGGATGTGGTTGTCACCCAAAACAGATTGTTTGCCTGCGAATTAGAATTTTTCGGCTTTAGATTAAGTCAACAGCTGAATTTTGTGAGCACTCGCTTAGTTC	chrX_9273894_9274142_+_dCP_twist_center127	twist	CCAGATGT	127	GATAA	AGATAAGA	NA	NA	NA	NA	NA	NA	NA	8.48963	NA	3.56994	-4.91969	NA
chrX_9273894_9274142_+_dCP_twist_center127_to_AP1	chrX_9273894_9274142	-	GTGGCAAGATGGGGTCTTAGTCATGTAGATAGTCCACACACTGGGGTATCTGGGGAGTCAGCGTAGTCATAGCAATGAACATTTCATATATATATATATATATATGGATATATACATACATTATGAGTCACTTGCAATTAAAATCAGAGGATGTGGTTGTCACCCAAAACAGATTGTTTGCCTGCGAATTAGAATTTTTCGGCTTTAGATTAAGTCAACAGCTGAATTTTGTGAGCACTCGCTTAGTTC	chrX_9273894_9274142_+_dCP_twist_center127	twist	CCCAGATGT	127	AP1	ATGAGTCAC	NA	NA	NA	NA	NA	NA	NA	8.48963	NA	3.56994	-4.91969	NA
chrX_9273894_9274142_+_dCP_twist_center127_to_Trl	chrX_9273894_9274142	-	GTGGCAAGATGGGGTCTTAGTCATGTAGATAGTCCACACACTGGGGTATCTGGGGAGTCAGCGTAGTCATAGCAATGAACATTTCATATATATATATATATATATGGATATATACATACATTCGAGAGAGTTTGCAATTAAAATCAGAGGATGTGGTTGTCACCCAAAACAGATTGTTTGCCTGCGAATTAGAATTTTTCGGCTTTAGATTAAGTCAACAGCTGAATTTTGTGAGCACTCGCTTAGTTC	chrX_9273894_9274142_+_dCP_twist_center127	twist	CCAGATG	127	Trl	GAGAGAG	46	40	43	37	32	21	4.55258	8.48963	-3.93705	3.56994	-4.91969	0.98264
chrX_9273894_9274142_+_dCP_twist_center127_to_ETS	chrX_9273894_9274142	-	GTGGCAAGATGGGGTCTTAGTCATGTAGATAGTCCACACACTGGGGTATCTGGGGAGTCAGCGTAGTCATAGCAATGAACATTTCATATATATATATATATATATGGATATATACATACATTACCGGAAGTTTGCAATTAAAATCAGAGGATGTGGTTGTCACCCAAAACAGATTGTTTGCCTGCGAATTAGAATTTTTCGGCTTTAGATTAAGTCAACAGCTGAATTTTGTGAGCACTCGCTTAGTTC	chrX_9273894_9274142_+_dCP_twist_center127	twist	CCCAGATGT	127	ETS	ACCGGAAGT	27	39	25	213	237	253	8.02539	8.48963	-0.464241	3.56994	-4.91969	4.45545
chrX_9273894_9274142_+_dCP_twist_center127_to_SREBP	chrX_9273894_9274142	-	GTGGCAAGATGGGGTCTTAGTCATGTAGATAGTCCACACACTGGGGTATCTGGGGAGTCAGCGTAGTCATAGCAATGAACATTTCATATATATATATATATATATGGATATATACATACATTATCACGCGACTGCAATTAAAATCAGAGGATGTGGTTGTCACCCAAAACAGATTGTTTGCCTGCGAATTAGAATTTTTCGGCTTTAGATTAAGTCAACAGCTGAATTTTGTGAGCACTCGCTTAGTTC	chrX_9273894_9274142_+_dCP_twist_center127	twist	CCCAGATGTT	127	SREBP	ATCACGCGAC	46	42	41	274	308	400	8.00443	8.48963	-0.485202	3.56994	-4.91969	4.43449
chrX_9273894_9274142_+_dCP_twist_center127_to_Stat92E	chrX_9273894_9274142	-	GTGGCAAGATGGGGTCTTAGTCATGTAGATAGTCCACACACTGGGGTATCTGGGGAGTCAGCGTAGTCATAGCAATGAACATTTCATATATATATATATATATATGGATATATACATACATTTTCCCGGAAATGCAATTAAAATCAGAGGATGTGGTTGTCACCCAAAACAGATTGTTTGCCTGCGAATTAGAATTTTTCGGCTTTAGATTAAGTCAACAGCTGAATTTTGTGAGCACTCGCTTAGTTC	chrX_9273894_9274142_+_dCP_twist_center127	twist	TCCCAGATGTT	127	Stat92E	TTTCCCGGAAA	20	26	11	40	23	26	5.69323	8.48963	-2.79639	3.56994	-4.91969	2.1233
chrX_9273894_9274142_+_dCP_twist_center127_to_Atf2	chrX_9273894_9274142	-	GTGGCAAGATGGGGTCTTAGTCATGTAGATAGTCCACACACTGGGGTATCTGGGGAGTCAGCGTAGTCATAGCAATGAACATTTCATATATATATATATATATATGGATATATACATACATATCACGTCATCTGCAATTAAAATCAGAGGATGTGGTTGTCACCCAAAACAGATTGTTTGCCTGCGAATTAGAATTTTTCGGCTTTAGATTAAGTCAACAGCTGAATTTTGTGAGCACTCGCTTAGTTC	chrX_9273894_9274142_+_dCP_twist_center127	twist	TCCCAGATGTT	127	Atf2	ATCACGTCATC	20	23	24	79	90	107	7.11407	8.48963	-1.37556	3.56994	-4.91969	3.54413
chr2R_16461218_16461466_+_dCP_twist_center116_to_GATAA	chr2R_16461218_16461466	+	AATGAGTGCTGTGGCAGCAGCCAATGGTATAGGTATAGAAAATCTACGAAGAAATCTCTGAAGCTCGTTATCTGTCTTCTGTTTTGGAAAGCCTGCTGTTCGAGGCAAAGCCAGATAAGATATTATGCGTCATCTATCGGCAATCTAAGTACAATTTGCCCTTGAAAAAAAGCGAAACCGTTTCGAGATTGGAATGCAAAATCGCCTGCTTCCTGGATGCTCGACCATTTGGCAGTTTGGGGGGCTGGG	chr2R_16461218_16461466_+_dCP_twist_center116	twist	GCAGATGT	116	GATAA	AGATAAGA	100	102	93	13	21	29	2.84082	4.64272	-1.80189	0.740849	-3.90187	2.09997
chr2R_16461218_16461466_+_dCP_twist_center116_to_AP1	chr2R_16461218_16461466	+	AATGAGTGCTGTGGCAGCAGCCAATGGTATAGGTATAGAAAATCTACGAAGAAATCTCTGAAGCTCGTTATCTGTCTTCTGTTTTGGAAAGCCTGCTGTTCGAGGCAAAGCATGAGTCACTATTATGCGTCATCTATCGGCAATCTAAGTACAATTTGCCCTTGAAAAAAAGCGAAACCGTTTCGAGATTGGAATGCAAAATCGCCTGCTTCCTGGATGCTCGACCATTTGGCAGTTTGGGGGGCTGGG	chr2R_16461218_16461466_+_dCP_twist_center116	twist	CGCAGATGT	116	AP1	ATGAGTCAC	150	139	141	120	111	187	5.01626	4.64272	0.373549	0.740849	-3.90187	4.27542
chr2R_16461218_16461466_+_dCP_twist_center116_to_Trl	chr2R_16461218_16461466	+	AATGAGTGCTGTGGCAGCAGCCAATGGTATAGGTATAGAAAATCTACGAAGAAATCTCTGAAGCTCGTTATCTGTCTTCTGTTTTGGAAAGCCTGCTGTTCGAGGCAAAGCCGAGAGAGTTATTATGCGTCATCTATCGGCAATCTAAGTACAATTTGCCCTTGAAAAAAAGCGAAACCGTTTCGAGATTGGAATGCAAAATCGCCTGCTTCCTGGATGCTCGACCATTTGGCAGTTTGGGGGGCTGGG	chr2R_16461218_16461466_+_dCP_twist_center116	twist	GCAGATG	116	Trl	GAGAGAG	61	57	42	11	8	14	2.78018	4.64272	-1.86253	0.740849	-3.90187	2.03934
chr2R_16461218_16461466_+_dCP_twist_center116_to_ETS	chr2R_16461218_16461466	+	AATGAGTGCTGTGGCAGCAGCCAATGGTATAGGTATAGAAAATCTACGAAGAAATCTCTGAAGCTCGTTATCTGTCTTCTGTTTTGGAAAGCCTGCTGTTCGAGGCAAAGCACCGGAAGTTATTATGCGTCATCTATCGGCAATCTAAGTACAATTTGCCCTTGAAAAAAAGCGAAACCGTTTCGAGATTGGAATGCAAAATCGCCTGCTTCCTGGATGCTCGACCATTTGGCAGTTTGGGGGGCTGGG	chr2R_16461218_16461466_+_dCP_twist_center116	twist	CGCAGATGT	116	ETS	ACCGGAAGT	157	127	132	266	309	383	6.28571	4.64272	1.64299	0.740849	-3.90187	5.54486
chr2R_16461218_16461466_+_dCP_twist_center116_to_SREBP	chr2R_16461218_16461466	+	AATGAGTGCTGTGGCAGCAGCCAATGGTATAGGTATAGAAAATCTACGAAGAAATCTCTGAAGCTCGTTATCTGTCTTCTGTTTTGGAAAGCCTGCTGTTCGAGGCAAAGCATCACGCGACATTATGCGTCATCTATCGGCAATCTAAGTACAATTTGCCCTTGAAAAAAAGCGAAACCGTTTCGAGATTGGAATGCAAAATCGCCTGCTTCCTGGATGCTCGACCATTTGGCAGTTTGGGGGGCTGGG	chr2R_16461218_16461466_+_dCP_twist_center116	twist	CGCAGATGTT	116	SREBP	ATCACGCGAC	115	103	92	897	1169	1388	8.56735	4.64272	3.92463	0.740849	-3.90187	7.8265
chr2R_16461218_16461466_+_dCP_twist_center116_to_Stat92E	chr2R_16461218_16461466	+	AATGAGTGCTGTGGCAGCAGCCAATGGTATAGGTATAGAAAATCTACGAAGAAATCTCTGAAGCTCGTTATCTGTCTTCTGTTTTGGAAAGCCTGCTGTTCGAGGCAAAGTTTCCCGGAAAATTATGCGTCATCTATCGGCAATCTAAGTACAATTTGCCCTTGAAAAAAAGCGAAACCGTTTCGAGATTGGAATGCAAAATCGCCTGCTTCCTGGATGCTCGACCATTTGGCAGTTTGGGGGGCTGGG	chr2R_16461218_16461466_+_dCP_twist_center116	twist	CCGCAGATGTT	116	Stat92E	TTTCCCGGAAA	114	111	90	15	12	21	2.34194	4.64272	-2.30078	0.740849	-3.90187	1.60109
chr2R_16461218_16461466_+_dCP_twist_center116_to_Atf2	chr2R_16461218_16461466	+	AATGAGTGCTGTGGCAGCAGCCAATGGTATAGGTATAGAAAATCTACGAAGAAATCTCTGAAGCTCGTTATCTGTCTTCTGTTTTGGAAAGCCTGCTGTTCGAGGCAAAGATCACGTCATCATTATGCGTCATCTATCGGCAATCTAAGTACAATTTGCCCTTGAAAAAAAGCGAAACCGTTTCGAGATTGGAATGCAAAATCGCCTGCTTCCTGGATGCTCGACCATTTGGCAGTTTGGGGGGCTGGG	chr2R_16461218_16461466_+_dCP_twist_center116	twist	CCGCAGATGTT	116	Atf2	ATCACGTCATC	91	67	74	76	107	115	5.45515	4.64272	0.812433	0.740849	-3.90187	4.7143
chrX_9375828_9376076_+_dCP_twist_center157_to_GATAA	chrX_9375828_9376076	+	ACGCCCACAAATAAATATGTGTGGGCCATTCGAAAGACTCATGTTTTTATGTGAAATCCACCAGCAATTAATCACGGCTTGGCGCTTCTCGGCACAAAAAAAAATAAAATAAAAAAAAGTGAAGTAAAAAAGACAGTGGAAACAATTTGCCCTAGATAAGATTCATTGAAATATATATCCAGATGTTCAACCTCAGACTCAGCGAATGTGTGTAAATTATTTCCCCCGATATCGGAATACTCTGCACGC	chrX_9375828_9376076_+_dCP_twist_center157	twist	CCACATGT	157	GATAA	AGATAAGA	NA	NA	NA	NA	NA	NA	NA	4.23037	NA	1.26115	-2.96921	NA
chrX_9375828_9376076_+_dCP_twist_center157_to_AP1	chrX_9375828_9376076	+	ACGCCCACAAATAAATATGTGTGGGCCATTCGAAAGACTCATGTTTTTATGTGAAATCCACCAGCAATTAATCACGGCTTGGCGCTTCTCGGCACAAAAAAAAATAAAATAAAAAAAAGTGAAGTAAAAAAGACAGTGGAAACAATTTGCCCATGAGTCACTTCATTGAAATATATATCCAGATGTTCAACCTCAGACTCAGCGAATGTGTGTAAATTATTTCCCCCGATATCGGAATACTCTGCACGC	chrX_9375828_9376076_+_dCP_twist_center157	twist	TCCACATGT	157	AP1	ATGAGTCAC	18	16	13	30	32	35	6.11638	4.23037	1.88601	1.26115	-2.96921	4.85523
chrX_9375828_9376076_+_dCP_twist_center157_to_Trl	chrX_9375828_9376076	+	ACGCCCACAAATAAATATGTGTGGGCCATTCGAAAGACTCATGTTTTTATGTGAAATCCACCAGCAATTAATCACGGCTTGGCGCTTCTCGGCACAAAAAAAAATAAAATAAAAAAAAGTGAAGTAAAAAAGACAGTGGAAACAATTTGCCCTGAGAGAGTTTCATTGAAATATATATCCAGATGTTCAACCTCAGACTCAGCGAATGTGTGTAAATTATTTCCCCCGATATCGGAATACTCTGCACGC	chrX_9375828_9376076_+_dCP_twist_center157	twist	CCACATG	157	Trl	GAGAGAG	18	16	13	4	2	7	3.20028	4.23037	-1.03009	1.26115	-2.96921	1.93913
chrX_9375828_9376076_+_dCP_twist_center157_to_ETS	chrX_9375828_9376076	+	ACGCCCACAAATAAATATGTGTGGGCCATTCGAAAGACTCATGTTTTTATGTGAAATCCACCAGCAATTAATCACGGCTTGGCGCTTCTCGGCACAAAAAAAAATAAAATAAAAAAAAGTGAAGTAAAAAAGACAGTGGAAACAATTTGCCCACCGGAAGTTTCATTGAAATATATATCCAGATGTTCAACCTCAGACTCAGCGAATGTGTGTAAATTATTTCCCCCGATATCGGAATACTCTGCACGC	chrX_9375828_9376076_+_dCP_twist_center157	twist	TCCACATGT	157	ETS	ACCGGAAGT	19	19	26	47	57	55	6.39003	4.23037	2.15967	1.26115	-2.96921	5.12888
chrX_9375828_9376076_+_dCP_twist_center157_to_SREBP	chrX_9375828_9376076	+	ACGCCCACAAATAAATATGTGTGGGCCATTCGAAAGACTCATGTTTTTATGTGAAATCCACCAGCAATTAATCACGGCTTGGCGCTTCTCGGCACAAAAAAAAATAAAATAAAAAAAAGTGAAGTAAAAAAGACAGTGGAAACAATTTGCCCATCACGCGACTCATTGAAATATATATCCAGATGTTCAACCTCAGACTCAGCGAATGTGTGTAAATTATTTCCCCCGATATCGGAATACTCTGCACGC	chrX_9375828_9376076_+_dCP_twist_center157	twist	TCCACATGTT	157	SREBP	ATCACGCGAC	45	49	48	37	49	44	4.9516	4.23037	0.721228	1.26115	-2.96921	3.69044
chrX_9375828_9376076_+_dCP_twist_center157_to_Stat92E	chrX_9375828_9376076	+	ACGCCCACAAATAAATATGTGTGGGCCATTCGAAAGACTCATGTTTTTATGTGAAATCCACCAGCAATTAATCACGGCTTGGCGCTTCTCGGCACAAAAAAAAATAAAATAAAAAAAAGTGAAGTAAAAAAGACAGTGGAAACAATTTGCCTTTCCCGGAAATCATTGAAATATATATCCAGATGTTCAACCTCAGACTCAGCGAATGTGTGTAAATTATTTCCCCCGATATCGGAATACTCTGCACGC	chrX_9375828_9376076_+_dCP_twist_center157	twist	CTCCACATGTT	157	Stat92E	TTTCCCGGAAA	25	32	26	17	16	30	4.65366	4.23037	0.423293	1.26115	-2.96921	3.39251
chrX_9375828_9376076_+_dCP_twist_center157_to_Atf2	chrX_9375828_9376076	+	ACGCCCACAAATAAATATGTGTGGGCCATTCGAAAGACTCATGTTTTTATGTGAAATCCACCAGCAATTAATCACGGCTTGGCGCTTCTCGGCACAAAAAAAAATAAAATAAAAAAAAGTGAAGTAAAAAAGACAGTGGAAACAATTTGCCATCACGTCATCTCATTGAAATATATATCCAGATGTTCAACCTCAGACTCAGCGAATGTGTGTAAATTATTTCCCCCGATATCGGAATACTCTGCACGC	chrX_9375828_9376076_+_dCP_twist_center157	twist	CTCCACATGTT	157	Atf2	ATCACGTCATC	13	10	15	9	10	11	4.72308	4.23037	0.492718	1.26115	-2.96921	3.46193
chrX_8868431_8868679_+_hkCP_twist_center169_to_GATAA	chrX_8868431_8868679	+	GAAGTGTAAGTTAATAGTATAGCAACAAATCTATCTTTTAAGAGTATTCAAAGAACTACTGATGAGTTCTTTTTCTGAGTGTACTTTCAAAGCGTGTAAACGTTGTTGGCATGACGTGTCTTTCGTTCCTTGAAACAGACCATCCGATCAGTGGGACTGCTGACAAGATAAGATGTTTCGGCCTATCAACCCCAATGAATTCAATATGATAACCAATCATTCAAGGCCTTAAGAAATGTGCTTGTTCAT	chrX_8868431_8868679_+_hkCP_twist_center169	twist	ACAGATGT	169	GATAA	AGATAAGA	64	52	60	7	7	9	2.1256	5.28568	-3.16008	1.41201	-3.87367	0.713592
chrX_8868431_8868679_+_hkCP_twist_center169_to_AP1	chrX_8868431_8868679	+	GAAGTGTAAGTTAATAGTATAGCAACAAATCTATCTTTTAAGAGTATTCAAAGAACTACTGATGAGTTCTTTTTCTGAGTGTACTTTCAAAGCGTGTAAACGTTGTTGGCATGACGTGTCTTTCGTTCCTTGAAACAGACCATCCGATCAGTGGGACTGCTGACATGAGTCACTGTTTCGGCCTATCAACCCCAATGAATTCAATATGATAACCAATCATTCAAGGCCTTAAGAAATGTGCTTGTTCAT	chrX_8868431_8868679_+_hkCP_twist_center169	twist	AACAGATGT	169	AP1	ATGAGTCAC	136	109	111	39	57	58	3.87999	5.28568	-1.40569	1.41201	-3.87367	2.46798
chrX_8868431_8868679_+_hkCP_twist_center169_to_Trl	chrX_8868431_8868679	+	GAAGTGTAAGTTAATAGTATAGCAACAAATCTATCTTTTAAGAGTATTCAAAGAACTACTGATGAGTTCTTTTTCTGAGTGTACTTTCAAAGCGTGTAAACGTTGTTGGCATGACGTGTCTTTCGTTCCTTGAAACAGACCATCCGATCAGTGGGACTGCTGACAGAGAGAGTTGTTTCGGCCTATCAACCCCAATGAATTCAATATGATAACCAATCATTCAAGGCCTTAAGAAATGTGCTTGTTCAT	chrX_8868431_8868679_+_hkCP_twist_center169	twist	ACAGATG	169	Trl	GAGAGAG	126	87	103	5	5	10	1.08204	5.28568	-4.20364	1.41201	-3.87367	-0.329965
chrX_8868431_8868679_+_hkCP_twist_center169_to_ETS	chrX_8868431_8868679	+	GAAGTGTAAGTTAATAGTATAGCAACAAATCTATCTTTTAAGAGTATTCAAAGAACTACTGATGAGTTCTTTTTCTGAGTGTACTTTCAAAGCGTGTAAACGTTGTTGGCATGACGTGTCTTTCGTTCCTTGAAACAGACCATCCGATCAGTGGGACTGCTGACACCGGAAGTTGTTTCGGCCTATCAACCCCAATGAATTCAATATGATAACCAATCATTCAAGGCCTTAAGAAATGTGCTTGTTCAT	chrX_8868431_8868679_+_hkCP_twist_center169	twist	AACAGATGT	169	ETS	ACCGGAAGT	92	63	86	54	48	49	4.39672	5.28568	-0.888963	1.41201	-3.87367	2.98471
chrX_8868431_8868679_+_hkCP_twist_center169_to_SREBP	chrX_8868431_8868679	+	GAAGTGTAAGTTAATAGTATAGCAACAAATCTATCTTTTAAGAGTATTCAAAGAACTACTGATGAGTTCTTTTTCTGAGTGTACTTTCAAAGCGTGTAAACGTTGTTGGCATGACGTGTCTTTCGTTCCTTGAAACAGACCATCCGATCAGTGGGACTGCTGACATCACGCGACGTTTCGGCCTATCAACCCCAATGAATTCAATATGATAACCAATCATTCAAGGCCTTAAGAAATGTGCTTGTTCAT	chrX_8868431_8868679_+_hkCP_twist_center169	twist	AACAGATGTT	169	SREBP	ATCACGCGAC	147	110	128	85	76	100	4.50634	5.28568	-0.779344	1.41201	-3.87367	3.09433
chrX_8868431_8868679_+_hkCP_twist_center169_to_Stat92E	chrX_8868431_8868679	+	GAAGTGTAAGTTAATAGTATAGCAACAAATCTATCTTTTAAGAGTATTCAAAGAACTACTGATGAGTTCTTTTTCTGAGTGTACTTTCAAAGCGTGTAAACGTTGTTGGCATGACGTGTCTTTCGTTCCTTGAAACAGACCATCCGATCAGTGGGACTGCTGATTTCCCGGAAAGTTTCGGCCTATCAACCCCAATGAATTCAATATGATAACCAATCATTCAAGGCCTTAAGAAATGTGCTTGTTCAT	chrX_8868431_8868679_+_hkCP_twist_center169	twist	CAACAGATGTT	169	Stat92E	TTTCCCGGAAA	67	82	72	19	12	20	2.93025	5.28568	-2.35543	1.41201	-3.87367	1.51824
chrX_8868431_8868679_+_hkCP_twist_center169_to_Atf2	chrX_8868431_8868679	+	GAAGTGTAAGTTAATAGTATAGCAACAAATCTATCTTTTAAGAGTATTCAAAGAACTACTGATGAGTTCTTTTTCTGAGTGTACTTTCAAAGCGTGTAAACGTTGTTGGCATGACGTGTCTTTCGTTCCTTGAAACAGACCATCCGATCAGTGGGACTGCTGAATCACGTCATCGTTTCGGCCTATCAACCCCAATGAATTCAATATGATAACCAATCATTCAAGGCCTTAAGAAATGTGCTTGTTCAT	chrX_8868431_8868679_+_hkCP_twist_center169	twist	CAACAGATGTT	169	Atf2	ATCACGTCATC	123	136	116	43	57	66	3.89824	5.28568	-1.38744	1.41201	-3.87367	2.48623
chr2R_11090126_11090374_+_dCP_twist_center54_to_GATAA	chr2R_11090126_11090374	+	AACCAACAACATCACATTAGTAAAAGATCCCAAATTGGCGTTAATTGTGTAGATAAGAAAGGCAAATCGTGGAGTCTTACTAATACGCGCTTTTCAGGGAATCTCGTCACAAGATGCGCAAACTCGTGAGGCATCTATCATTGATGCTCTCGGCATGAATCACTTGACTAACCGACGATTGGGTTTTTACTATGGTCGAGCTCGAAGTTTATCGGATAAGGAGAGAAAATATCTGGGGATAGCTTTACT	chr2R_11090126_11090374_+_dCP_twist_center54	twist	CCATATGG	54	GATAA	AGATAAGA	89	77	71	18	15	21	2.92705	3.81061	-0.883558	1.80171	-2.00889	1.12533
chr2R_11090126_11090374_+_dCP_twist_center54_to_AP1	chr2R_11090126_11090374	+	AACCAACAACATCACATTAGTAAAAGATCCCAAATTGGCGTTAATTGTGATGAGTCACAAGGCAAATCGTGGAGTCTTACTAATACGCGCTTTTCAGGGAATCTCGTCACAAGATGCGCAAACTCGTGAGGCATCTATCATTGATGCTCTCGGCATGAATCACTTGACTAACCGACGATTGGGTTTTTACTATGGTCGAGCTCGAAGTTTATCGGATAAGGAGAGAAAATATCTGGGGATAGCTTTACT	chr2R_11090126_11090374_+_dCP_twist_center54	twist	TCCATATGG	54	AP1	ATGAGTCAC	72	45	65	8	14	12	2.66062	3.81061	-1.14999	1.80171	-2.00889	0.858902
chr2R_11090126_11090374_+_dCP_twist_center54_to_Trl	chr2R_11090126_11090374	+	AACCAACAACATCACATTAGTAAAAGATCCCAAATTGGCGTTAATTGTGTGAGAGAGGAAGGCAAATCGTGGAGTCTTACTAATACGCGCTTTTCAGGGAATCTCGTCACAAGATGCGCAAACTCGTGAGGCATCTATCATTGATGCTCTCGGCATGAATCACTTGACTAACCGACGATTGGGTTTTTACTATGGTCGAGCTCGAAGTTTATCGGATAAGGAGAGAAAATATCTGGGGATAGCTTTACT	chr2R_11090126_11090374_+_dCP_twist_center54	twist	CCATATG	54	Trl	GAGAGAG	81	82	88	12	11	16	2.36901	3.81061	-1.44159	1.80171	-2.00889	0.567298
chr2R_11090126_11090374_+_dCP_twist_center54_to_ETS	chr2R_11090126_11090374	+	AACCAACAACATCACATTAGTAAAAGATCCCAAATTGGCGTTAATTGTGACCGGAAGTAAGGCAAATCGTGGAGTCTTACTAATACGCGCTTTTCAGGGAATCTCGTCACAAGATGCGCAAACTCGTGAGGCATCTATCATTGATGCTCTCGGCATGAATCACTTGACTAACCGACGATTGGGTTTTTACTATGGTCGAGCTCGAAGTTTATCGGATAAGGAGAGAAAATATCTGGGGATAGCTTTACT	chr2R_11090126_11090374_+_dCP_twist_center54	twist	TCCATATGG	54	ETS	ACCGGAAGT	160	154	141	29	39	72	3.36322	3.81061	-0.447388	1.80171	-2.00889	1.5615
chr2R_11090126_11090374_+_dCP_twist_center54_to_SREBP	chr2R_11090126_11090374	+	AACCAACAACATCACATTAGTAAAAGATCCCAAATTGGCGTTAATTGTGATCACGCGACAGGCAAATCGTGGAGTCTTACTAATACGCGCTTTTCAGGGAATCTCGTCACAAGATGCGCAAACTCGTGAGGCATCTATCATTGATGCTCTCGGCATGAATCACTTGACTAACCGACGATTGGGTTTTTACTATGGTCGAGCTCGAAGTTTATCGGATAAGGAGAGAAAATATCTGGGGATAGCTTTACT	chr2R_11090126_11090374_+_dCP_twist_center54	twist	TCCATATGGA	54	SREBP	ATCACGCGAC	122	112	125	22	17	21	2.4758	3.81061	-1.33481	1.80171	-2.00889	0.674084
chr2R_11090126_11090374_+_dCP_twist_center54_to_Stat92E	chr2R_11090126_11090374	+	AACCAACAACATCACATTAGTAAAAGATCCCAAATTGGCGTTAATTGTTTTCCCGGAAAAGGCAAATCGTGGAGTCTTACTAATACGCGCTTTTCAGGGAATCTCGTCACAAGATGCGCAAACTCGTGAGGCATCTATCATTGATGCTCTCGGCATGAATCACTTGACTAACCGACGATTGGGTTTTTACTATGGTCGAGCTCGAAGTTTATCGGATAAGGAGAGAAAATATCTGGGGATAGCTTTACT	chr2R_11090126_11090374_+_dCP_twist_center54	twist	GTCCATATGGA	54	Stat92E	TTTCCCGGAAA	137	97	137	18	17	21	2.33723	3.81061	-1.47338	1.80171	-2.00889	0.535515
chr2R_11090126_11090374_+_dCP_twist_center54_to_Atf2	chr2R_11090126_11090374	+	AACCAACAACATCACATTAGTAAAAGATCCCAAATTGGCGTTAATTGTATCACGTCATCAGGCAAATCGTGGAGTCTTACTAATACGCGCTTTTCAGGGAATCTCGTCACAAGATGCGCAAACTCGTGAGGCATCTATCATTGATGCTCTCGGCATGAATCACTTGACTAACCGACGATTGGGTTTTTACTATGGTCGAGCTCGAAGTTTATCGGATAAGGAGAGAAAATATCTGGGGATAGCTTTACT	chr2R_11090126_11090374_+_dCP_twist_center54	twist	GTCCATATGGA	54	Atf2	ATCACGTCATC	190	159	157	28	11	19	1.9232	3.81061	-1.88741	1.80171	-2.00889	0.121483
chr2R_2026192_2026440_+_dCP_twist_center75_to_GATAA	chr2R_2026192_2026440	+	TACCTACCACCTACCGCCTCCCAATTTCCTAAACGCACCGCCCTCTCCTCCCTTCGATGGCCTTCGCGACAAGATAAGACGGAAACGAAACGAAAACAAAATGCAAAATATAGCTGTCTACCAGTCGGTCGTCTGTTTGTTCCAACTGCGACTGCTAAGACGATGACTTATCAAGGCAGAATTTAGCGATTGGTTCTTTAGCTTTCTTCTTCGTTCCCCCACTGTGCCAGAACTCTCCATTTTATTTTC	chr2R_2026192_2026440_+_dCP_twist_center75	twist	ACATCTGG	75	GATAA	AGATAAGA	182	175	184	227	191	196	5.24868	7.67146	-2.42277	3.68871	-3.98275	1.55997
chr2R_2026192_2026440_+_dCP_twist_center75_to_AP1	chr2R_2026192_2026440	+	TACCTACCACCTACCGCCTCCCAATTTCCTAAACGCACCGCCCTCTCCTCCCTTCGATGGCCTTCGCGACATGAGTCACCGGAAACGAAACGAAAACAAAATGCAAAATATAGCTGTCTACCAGTCGGTCGTCTGTTTGTTCCAACTGCGACTGCTAAGACGATGACTTATCAAGGCAGAATTTAGCGATTGGTTCTTTAGCTTTCTTCTTCGTTCCCCCACTGTGCCAGAACTCTCCATTTTATTTTC	chr2R_2026192_2026440_+_dCP_twist_center75	twist	AACATCTGG	75	AP1	ATGAGTCAC	134	123	121	715	637	763	7.55273	7.67146	-0.118725	3.68871	-3.98275	3.86402
chr2R_2026192_2026440_+_dCP_twist_center75_to_Trl	chr2R_2026192_2026440	+	TACCTACCACCTACCGCCTCCCAATTTCCTAAACGCACCGCCCTCTCCTCCCTTCGATGGCCTTCGCGACAGAGAGAGGCGGAAACGAAACGAAAACAAAATGCAAAATATAGCTGTCTACCAGTCGGTCGTCTGTTTGTTCCAACTGCGACTGCTAAGACGATGACTTATCAAGGCAGAATTTAGCGATTGGTTCTTTAGCTTTCTTCTTCGTTCCCCCACTGTGCCAGAACTCTCCATTTTATTTTC	chr2R_2026192_2026440_+_dCP_twist_center75	twist	ACATCTG	75	Trl	GAGAGAG	205	195	180	120	104	131	4.35459	7.67146	-3.31687	3.68871	-3.98275	0.665876
chr2R_2026192_2026440_+_dCP_twist_center75_to_ETS	chr2R_2026192_2026440	+	TACCTACCACCTACCGCCTCCCAATTTCCTAAACGCACCGCCCTCTCCTCCCTTCGATGGCCTTCGCGACACCGGAAGTCGGAAACGAAACGAAAACAAAATGCAAAATATAGCTGTCTACCAGTCGGTCGTCTGTTTGTTCCAACTGCGACTGCTAAGACGATGACTTATCAAGGCAGAATTTAGCGATTGGTTCTTTAGCTTTCTTCTTCGTTCCCCCACTGTGCCAGAACTCTCCATTTTATTTTC	chr2R_2026192_2026440_+_dCP_twist_center75	twist	AACATCTGG	75	ETS	ACCGGAAGT	200	155	164	368	278	336	5.9843	7.67146	-1.68716	3.68871	-3.98275	2.29559
chr2R_2026192_2026440_+_dCP_twist_center75_to_SREBP	chr2R_2026192_2026440	+	TACCTACCACCTACCGCCTCCCAATTTCCTAAACGCACCGCCCTCTCCTCCCTTCGATGGCCTTCGCGACATCACGCGACGGAAACGAAACGAAAACAAAATGCAAAATATAGCTGTCTACCAGTCGGTCGTCTGTTTGTTCCAACTGCGACTGCTAAGACGATGACTTATCAAGGCAGAATTTAGCGATTGGTTCTTTAGCTTTCTTCTTCGTTCCCCCACTGTGCCAGAACTCTCCATTTTATTTTC	chr2R_2026192_2026440_+_dCP_twist_center75	twist	AACATCTGGC	75	SREBP	ATCACGCGAC	376	329	321	5820	5591	6463	9.19892	7.67146	1.52746	3.68871	-3.98275	5.5102
chr2R_2026192_2026440_+_dCP_twist_center75_to_Stat92E	chr2R_2026192_2026440	+	TACCTACCACCTACCGCCTCCCAATTTCCTAAACGCACCGCCCTCTCCTCCCTTCGATGGCCTTCGCGATTTCCCGGAAAGGAAACGAAACGAAAACAAAATGCAAAATATAGCTGTCTACCAGTCGGTCGTCTGTTTGTTCCAACTGCGACTGCTAAGACGATGACTTATCAAGGCAGAATTTAGCGATTGGTTCTTTAGCTTTCTTCTTCGTTCCCCCACTGTGCCAGAACTCTCCATTTTATTTTC	chr2R_2026192_2026440_+_dCP_twist_center75	twist	CAACATCTGGC	75	Stat92E	TTTCCCGGAAA	396	291	331	758	497	642	5.95511	7.67146	-1.71635	3.68871	-3.98275	2.2664
chr2R_2026192_2026440_+_dCP_twist_center75_to_Atf2	chr2R_2026192_2026440	+	TACCTACCACCTACCGCCTCCCAATTTCCTAAACGCACCGCCCTCTCCTCCCTTCGATGGCCTTCGCGAATCACGTCATCGGAAACGAAACGAAAACAAAATGCAAAATATAGCTGTCTACCAGTCGGTCGTCTGTTTGTTCCAACTGCGACTGCTAAGACGATGACTTATCAAGGCAGAATTTAGCGATTGGTTCTTTAGCTTTCTTCTTCGTTCCCCCACTGTGCCAGAACTCTCCATTTTATTTTC	chr2R_2026192_2026440_+_dCP_twist_center75	twist	CAACATCTGGC	75	Atf2	ATCACGTCATC	135	154	127	250	229	255	5.88525	7.67146	-1.78621	3.68871	-3.98275	2.19653
chr2L_3958910_3959158_+_dCP_twist_center68_to_GATAA	chr2L_3958910_3959158	-	GAAACCCCCTCGAATAAATAGTTGCAATTGCGCGCTCGGCAAGGCAAAATCATCATTTATGGCAAGATAAGATTGACAATCTGCCCCCGACCACCGTCATTCATTATCTTTCGCTAATTGAGTCATCTGGCAGTGGCTTATCTATCATCTTATTTGTGTGGGCAATTTGGCCAGCGCCTTCCGCTGAATATCGTTTGAGTAATATCGCTGCTGGAACTGCGGGTTATGGCCTTGCCTTCAATCATGTCC	chr2L_3958910_3959158_+_dCP_twist_center68	twist	GCATCTGT	68	GATAA	AGATAAGA	297	249	225	39	20	36	2.03017	6.13126	-4.10108	2.43337	-3.69788	-0.403198
chr2L_3958910_3959158_+_dCP_twist_center68_to_AP1	chr2L_3958910_3959158	-	GAAACCCCCTCGAATAAATAGTTGCAATTGCGCGCTCGGCAAGGCAAAATCATCATTTATGGCATGAGTCACTTGACAATCTGCCCCCGACCACCGTCATTCATTATCTTTCGCTAATTGAGTCATCTGGCAGTGGCTTATCTATCATCTTATTTGTGTGGGCAATTTGGCCAGCGCCTTCCGCTGAATATCGTTTGAGTAATATCGCTGCTGGAACTGCGGGTTATGGCCTTGCCTTCAATCATGTCC	chr2L_3958910_3959158_+_dCP_twist_center68	twist	AGCATCTGT	68	AP1	ATGAGTCAC	268	236	248	946	1007	1248	7.16616	6.13126	1.0349	2.43337	-3.69788	4.73279
chr2L_3958910_3959158_+_dCP_twist_center68_to_Trl	chr2L_3958910_3959158	-	GAAACCCCCTCGAATAAATAGTTGCAATTGCGCGCTCGGCAAGGCAAAATCATCATTTATGGCAGAGAGAGTTTGACAATCTGCCCCCGACCACCGTCATTCATTATCTTTCGCTAATTGAGTCATCTGGCAGTGGCTTATCTATCATCTTATTTGTGTGGGCAATTTGGCCAGCGCCTTCCGCTGAATATCGTTTGAGTAATATCGCTGCTGGAACTGCGGGTTATGGCCTTGCCTTCAATCATGTCC	chr2L_3958910_3959158_+_dCP_twist_center68	twist	GCATCTG	68	Trl	GAGAGAG	202	168	176	105	83	102	4.14977	6.13126	-1.98148	2.43337	-3.69788	1.7164
chr2L_3958910_3959158_+_dCP_twist_center68_to_ETS	chr2L_3958910_3959158	-	GAAACCCCCTCGAATAAATAGTTGCAATTGCGCGCTCGGCAAGGCAAAATCATCATTTATGGCACCGGAAGTTTGACAATCTGCCCCCGACCACCGTCATTCATTATCTTTCGCTAATTGAGTCATCTGGCAGTGGCTTATCTATCATCTTATTTGTGTGGGCAATTTGGCCAGCGCCTTCCGCTGAATATCGTTTGAGTAATATCGCTGCTGGAACTGCGGGTTATGGCCTTGCCTTCAATCATGTCC	chr2L_3958910_3959158_+_dCP_twist_center68	twist	AGCATCTGT	68	ETS	ACCGGAAGT	321	302	290	2622	2677	3001	8.26218	6.13126	2.13093	2.43337	-3.69788	5.82881
chr2L_3958910_3959158_+_dCP_twist_center68_to_SREBP	chr2L_3958910_3959158	-	GAAACCCCCTCGAATAAATAGTTGCAATTGCGCGCTCGGCAAGGCAAAATCATCATTTATGGCATCACGCGACTGACAATCTGCCCCCGACCACCGTCATTCATTATCTTTCGCTAATTGAGTCATCTGGCAGTGGCTTATCTATCATCTTATTTGTGTGGGCAATTTGGCCAGCGCCTTCCGCTGAATATCGTTTGAGTAATATCGCTGCTGGAACTGCGGGTTATGGCCTTGCCTTCAATCATGTCC	chr2L_3958910_3959158_+_dCP_twist_center68	twist	AGCATCTGTT	68	SREBP	ATCACGCGAC	423	404	410	1868	2264	2675	7.54232	6.13126	1.41107	2.43337	-3.69788	5.10895
chr2L_3958910_3959158_+_dCP_twist_center68_to_Stat92E	chr2L_3958910_3959158	-	GAAACCCCCTCGAATAAATAGTTGCAATTGCGCGCTCGGCAAGGCAAAATCATCATTTATGGTTTCCCGGAAATGACAATCTGCCCCCGACCACCGTCATTCATTATCTTTCGCTAATTGAGTCATCTGGCAGTGGCTTATCTATCATCTTATTTGTGTGGGCAATTTGGCCAGCGCCTTCCGCTGAATATCGTTTGAGTAATATCGCTGCTGGAACTGCGGGTTATGGCCTTGCCTTCAATCATGTCC	chr2L_3958910_3959158_+_dCP_twist_center68	twist	CAGCATCTGTT	68	Stat92E	TTTCCCGGAAA	245	223	241	2263	2333	2724	8.44407	6.13126	2.31281	2.43337	-3.69788	6.0107
chr2L_3958910_3959158_+_dCP_twist_center68_to_Atf2	chr2L_3958910_3959158	-	GAAACCCCCTCGAATAAATAGTTGCAATTGCGCGCTCGGCAAGGCAAAATCATCATTTATGGATCACGTCATCTGACAATCTGCCCCCGACCACCGTCATTCATTATCTTTCGCTAATTGAGTCATCTGGCAGTGGCTTATCTATCATCTTATTTGTGTGGGCAATTTGGCCAGCGCCTTCCGCTGAATATCGTTTGAGTAATATCGCTGCTGGAACTGCGGGTTATGGCCTTGCCTTCAATCATGTCC	chr2L_3958910_3959158_+_dCP_twist_center68	twist	CAGCATCTGTT	68	Atf2	ATCACGTCATC	300	273	272	850	940	1119	6.86287	6.13126	0.73161	2.43337	-3.69788	4.42949
chr2L_4648723_4648971_+_dCP_twist_center183_to_GATAA	chr2L_4648723_4648971	+	CGCCTTTTCTCCTTTTCTTCGTGCCGGCCTGTTACTAATTTGAATTGCAGTGCACCAGACTCGAGACGAGCTTCCTTTTCATTATCTAAGGGTCTAAGACTTCATTGCTGGCAGTTATCAAATGCAGCACATCAGGCGAAGCCAAACTGCAGACTCCGAGTCAGTCTGAGAATTCAAAGAGATAAGACTGCCAGACTGCACAGGAAGAAGAAGTTTTTAGGCGGAATTAGCTTAAGATAAACGATATCA	chr2L_4648723_4648971_+_dCP_twist_center183	twist	ACAGATGT	183	GATAA	AGATAAGA	83	91	74	30	30	38	3.72191	3.43463	0.287279	0.542476	-2.89216	3.17944
chr2L_4648723_4648971_+_dCP_twist_center183_to_AP1	chr2L_4648723_4648971	+	CGCCTTTTCTCCTTTTCTTCGTGCCGGCCTGTTACTAATTTGAATTGCAGTGCACCAGACTCGAGACGAGCTTCCTTTTCATTATCTAAGGGTCTAAGACTTCATTGCTGGCAGTTATCAAATGCAGCACATCAGGCGAAGCCAAACTGCAGACTCCGAGTCAGTCTGAGAATTCAAAATGAGTCACCTGCCAGACTGCACAGGAAGAAGAAGTTTTTAGGCGGAATTAGCTTAAGATAAACGATATCA	chr2L_4648723_4648971_+_dCP_twist_center183	twist	GACAGATGT	183	AP1	ATGAGTCAC	26	31	42	8	14	11	3.48397	3.43463	0.0493363	0.542476	-2.89216	2.94149
chr2L_4648723_4648971_+_dCP_twist_center183_to_Trl	chr2L_4648723_4648971	+	CGCCTTTTCTCCTTTTCTTCGTGCCGGCCTGTTACTAATTTGAATTGCAGTGCACCAGACTCGAGACGAGCTTCCTTTTCATTATCTAAGGGTCTAAGACTTCATTGCTGGCAGTTATCAAATGCAGCACATCAGGCGAAGCCAAACTGCAGACTCCGAGTCAGTCTGAGAATTCAAAGGAGAGAGTCTGCCAGACTGCACAGGAAGAAGAAGTTTTTAGGCGGAATTAGCTTAAGATAAACGATATCA	chr2L_4648723_4648971_+_dCP_twist_center183	twist	ACAGATG	183	Trl	GAGAGAG	123	103	105	13	4	8	1.32415	3.43463	-2.11048	0.542476	-2.89216	0.781674
chr2L_4648723_4648971_+_dCP_twist_center183_to_ETS	chr2L_4648723_4648971	+	CGCCTTTTCTCCTTTTCTTCGTGCCGGCCTGTTACTAATTTGAATTGCAGTGCACCAGACTCGAGACGAGCTTCCTTTTCATTATCTAAGGGTCTAAGACTTCATTGCTGGCAGTTATCAAATGCAGCACATCAGGCGAAGCCAAACTGCAGACTCCGAGTCAGTCTGAGAATTCAAAACCGGAAGTCTGCCAGACTGCACAGGAAGAAGAAGTTTTTAGGCGGAATTAGCTTAAGATAAACGATATCA	chr2L_4648723_4648971_+_dCP_twist_center183	twist	GACAGATGT	183	ETS	ACCGGAAGT	37	30	27	12	1	13	3.18337	3.43463	-0.251261	0.542476	-2.89216	2.6409
chr2L_4648723_4648971_+_dCP_twist_center183_to_SREBP	chr2L_4648723_4648971	+	CGCCTTTTCTCCTTTTCTTCGTGCCGGCCTGTTACTAATTTGAATTGCAGTGCACCAGACTCGAGACGAGCTTCCTTTTCATTATCTAAGGGTCTAAGACTTCATTGCTGGCAGTTATCAAATGCAGCACATCAGGCGAAGCCAAACTGCAGACTCCGAGTCAGTCTGAGAATTCAAAATCACGCGACTGCCAGACTGCACAGGAAGAAGAAGTTTTTAGGCGGAATTAGCTTAAGATAAACGATATCA	chr2L_4648723_4648971_+_dCP_twist_center183	twist	GACAGATGTC	183	SREBP	ATCACGCGAC	41	44	42	43	28	45	4.91799	3.43463	1.48335	0.542476	-2.89216	4.37551
chr2L_4648723_4648971_+_dCP_twist_center183_to_Stat92E	chr2L_4648723_4648971	+	CGCCTTTTCTCCTTTTCTTCGTGCCGGCCTGTTACTAATTTGAATTGCAGTGCACCAGACTCGAGACGAGCTTCCTTTTCATTATCTAAGGGTCTAAGACTTCATTGCTGGCAGTTATCAAATGCAGCACATCAGGCGAAGCCAAACTGCAGACTCCGAGTCAGTCTGAGAATTCAATTTCCCGGAAATGCCAGACTGCACAGGAAGAAGAAGTTTTTAGGCGGAATTAGCTTAAGATAAACGATATCA	chr2L_4648723_4648971_+_dCP_twist_center183	twist	AGACAGATGTC	183	Stat92E	TTTCCCGGAAA	125	115	96	57	48	64	4.07077	3.43463	0.636139	0.542476	-2.89216	3.5283
chr2L_4648723_4648971_+_dCP_twist_center183_to_Atf2	chr2L_4648723_4648971	+	CGCCTTTTCTCCTTTTCTTCGTGCCGGCCTGTTACTAATTTGAATTGCAGTGCACCAGACTCGAGACGAGCTTCCTTTTCATTATCTAAGGGTCTAAGACTTCATTGCTGGCAGTTATCAAATGCAGCACATCAGGCGAAGCCAAACTGCAGACTCCGAGTCAGTCTGAGAATTCAAATCACGTCATCTGCCAGACTGCACAGGAAGAAGAAGTTTTTAGGCGGAATTAGCTTAAGATAAACGATATCA	chr2L_4648723_4648971_+_dCP_twist_center183	twist	AGACAGATGTC	183	Atf2	ATCACGTCATC	91	82	94	16	19	10	2.50487	3.43463	-0.929763	0.542476	-2.89216	1.96239
chr3L_3240143_3240391_+_dCP_twist_center22_to_GATAA	chr3L_3240143_3240391	-	TGATACCAATTCGTATGTAGATAAGAAGGTTCGACAACAAAGTTCTGATTGACTTTGTTTGCCGAAACAATTTCAGAGCGCCAAAGATAATGCGAATAAAATGGAAATGGAGAGGGACCTCTGAAATACATCCACTAGTTCTTTATCAAAAATTGCTCTGTGGCTTTTGCTTTTGCTGCTGCTGTGCAAATATTTAATACATTTTTTGCGCTCGCCAAAAGCGCAAAACAAAAGAACCCAAAAAAAGAG	chr3L_3240143_3240391_+_dCP_twist_center22	twist	ACATATGT	22	GATAA	AGATAAGA	36	39	37	54	68	74	5.88389	4.53073	1.35316	0.977632	-3.5531	4.90625
chr3L_3240143_3240391_+_dCP_twist_center22_to_AP1	chr3L_3240143_3240391	-	TGATACCAATTCGTATGATGAGTCACAGGTTCGACAACAAAGTTCTGATTGACTTTGTTTGCCGAAACAATTTCAGAGCGCCAAAGATAATGCGAATAAAATGGAAATGGAGAGGGACCTCTGAAATACATCCACTAGTTCTTTATCAAAAATTGCTCTGTGGCTTTTGCTTTTGCTGCTGCTGTGCAAATATTTAATACATTTTTTGCGCTCGCCAAAAGCGCAAAACAAAAGAACCCAAAAAAAGAG	chr3L_3240143_3240391_+_dCP_twist_center22	twist	TACATATGT	22	AP1	ATGAGTCAC	58	68	48	150	139	149	6.40043	4.53073	1.8697	0.977632	-3.5531	5.4228
chr3L_3240143_3240391_+_dCP_twist_center22_to_Trl	chr3L_3240143_3240391	-	TGATACCAATTCGTATGTGAGAGAGTAGGTTCGACAACAAAGTTCTGATTGACTTTGTTTGCCGAAACAATTTCAGAGCGCCAAAGATAATGCGAATAAAATGGAAATGGAGAGGGACCTCTGAAATACATCCACTAGTTCTTTATCAAAAATTGCTCTGTGGCTTTTGCTTTTGCTGCTGCTGTGCAAATATTTAATACATTTTTTGCGCTCGCCAAAAGCGCAAAACAAAAGAACCCAAAAAAAGAG	chr3L_3240143_3240391_+_dCP_twist_center22	twist	ACATATG	22	Trl	GAGAGAG	40	35	23	13	15	19	4.00989	4.53073	-0.520837	0.977632	-3.5531	3.03226
chr3L_3240143_3240391_+_dCP_twist_center22_to_ETS	chr3L_3240143_3240391	-	TGATACCAATTCGTATGACCGGAAGTAGGTTCGACAACAAAGTTCTGATTGACTTTGTTTGCCGAAACAATTTCAGAGCGCCAAAGATAATGCGAATAAAATGGAAATGGAGAGGGACCTCTGAAATACATCCACTAGTTCTTTATCAAAAATTGCTCTGTGGCTTTTGCTTTTGCTGCTGCTGTGCAAATATTTAATACATTTTTTGCGCTCGCCAAAAGCGCAAAACAAAAGAACCCAAAAAAAGAG	chr3L_3240143_3240391_+_dCP_twist_center22	twist	TACATATGT	22	ETS	ACCGGAAGT	42	33	32	250	231	227	7.80519	4.53073	3.27446	0.977632	-3.5531	6.82756
chr3L_3240143_3240391_+_dCP_twist_center22_to_SREBP	chr3L_3240143_3240391	-	TGATACCAATTCGTATGATCACGCGACGGTTCGACAACAAAGTTCTGATTGACTTTGTTTGCCGAAACAATTTCAGAGCGCCAAAGATAATGCGAATAAAATGGAAATGGAGAGGGACCTCTGAAATACATCCACTAGTTCTTTATCAAAAATTGCTCTGTGGCTTTTGCTTTTGCTGCTGCTGTGCAAATATTTAATACATTTTTTGCGCTCGCCAAAAGCGCAAAACAAAAGAACCCAAAAAAAGAG	chr3L_3240143_3240391_+_dCP_twist_center22	twist	TACATATGTA	22	SREBP	ATCACGCGAC	65	38	53	98	77	92	5.84392	4.53073	1.31319	0.977632	-3.5531	4.86629
chr3L_3240143_3240391_+_dCP_twist_center22_to_Stat92E	chr3L_3240143_3240391	-	TGATACCAATTCGTATTTTCCCGGAAAGGTTCGACAACAAAGTTCTGATTGACTTTGTTTGCCGAAACAATTTCAGAGCGCCAAAGATAATGCGAATAAAATGGAAATGGAGAGGGACCTCTGAAATACATCCACTAGTTCTTTATCAAAAATTGCTCTGTGGCTTTTGCTTTTGCTGCTGCTGTGCAAATATTTAATACATTTTTTGCGCTCGCCAAAAGCGCAAAACAAAAGAACCCAAAAAAAGAG	chr3L_3240143_3240391_+_dCP_twist_center22	twist	GTACATATGTA	22	Stat92E	TTTCCCGGAAA	84	62	71	48	29	49	4.26906	4.53073	-0.261675	0.977632	-3.5531	3.29142
chr3L_3240143_3240391_+_dCP_twist_center22_to_Atf2	chr3L_3240143_3240391	-	TGATACCAATTCGTATATCACGTCATCGGTTCGACAACAAAGTTCTGATTGACTTTGTTTGCCGAAACAATTTCAGAGCGCCAAAGATAATGCGAATAAAATGGAAATGGAGAGGGACCTCTGAAATACATCCACTAGTTCTTTATCAAAAATTGCTCTGTGGCTTTTGCTTTTGCTGCTGCTGTGCAAATATTTAATACATTTTTTGCGCTCGCCAAAAGCGCAAAACAAAAGAACCCAAAAAAAGAG	chr3L_3240143_3240391_+_dCP_twist_center22	twist	GTACATATGTA	22	Atf2	ATCACGTCATC	87	62	88	46	25	49	4.06427	4.53073	-0.466461	0.977632	-3.5531	3.08664
chr2R_20148231_20148479_+_dCP_twist_center80_to_GATAA	chr2R_20148231_20148479	-	CTTATATCGGTTGCTATCAGCTCACTTACTGATTTCCGAGATGGCCTTATCAAGCCGCTTTATCAGCATCTGTTGAAGATAAGAAGTTTGTACACTATTTGCTCAGATTTTTTATTTTTTGTTGGCACTGTGCTATCAAGATGCAGTTGTTTTCAGAGGAAATGGCTTTATCAGTGTGAACTAAATAACGCGTTGAACACGCAAAGTAAATATGTAGTGGGTAAACAGGAATTAAACAACAAAATAGTT	chr2R_20148231_20148479_+_dCP_twist_center80	twist	CCAGATGT	80	GATAA	AGATAAGA	28	28	30	3	5	3	2.09611	5.14618	-3.05007	2.03075	-3.11543	0.0653577
chr2R_20148231_20148479_+_dCP_twist_center80_to_AP1	chr2R_20148231_20148479	-	CTTATATCGGTTGCTATCAGCTCACTTACTGATTTCCGAGATGGCCTTATCAAGCCGCTTTATCAGCATCTGTTGATGAGTCACAGTTTGTACACTATTTGCTCAGATTTTTTATTTTTTGTTGGCACTGTGCTATCAAGATGCAGTTGTTTTCAGAGGAAATGGCTTTATCAGTGTGAACTAAATAACGCGTTGAACACGCAAAGTAAATATGTAGTGGGTAAACAGGAATTAAACAACAAAATAGTT	chr2R_20148231_20148479_+_dCP_twist_center80	twist	ACCAGATGT	80	AP1	ATGAGTCAC	69	51	73	42	29	46	4.33193	5.14618	-0.814247	2.03075	-3.11543	2.30118
chr2R_20148231_20148479_+_dCP_twist_center80_to_Trl	chr2R_20148231_20148479	-	CTTATATCGGTTGCTATCAGCTCACTTACTGATTTCCGAGATGGCCTTATCAAGCCGCTTTATCAGCATCTGTTGAGAGAGAGTAGTTTGTACACTATTTGCTCAGATTTTTTATTTTTTGTTGGCACTGTGCTATCAAGATGCAGTTGTTTTCAGAGGAAATGGCTTTATCAGTGTGAACTAAATAACGCGTTGAACACGCAAAGTAAATATGTAGTGGGTAAACAGGAATTAAACAACAAAATAGTT	chr2R_20148231_20148479_+_dCP_twist_center80	twist	CCAGATG	80	Trl	GAGAGAG	69	56	54	6	5	9	1.89859	5.14618	-3.24759	2.03075	-3.11543	-0.132166
chr2R_20148231_20148479_+_dCP_twist_center80_to_ETS	chr2R_20148231_20148479	-	CTTATATCGGTTGCTATCAGCTCACTTACTGATTTCCGAGATGGCCTTATCAAGCCGCTTTATCAGCATCTGTTGACCGGAAGTAGTTTGTACACTATTTGCTCAGATTTTTTATTTTTTGTTGGCACTGTGCTATCAAGATGCAGTTGTTTTCAGAGGAAATGGCTTTATCAGTGTGAACTAAATAACGCGTTGAACACGCAAAGTAAATATGTAGTGGGTAAACAGGAATTAAACAACAAAATAGTT	chr2R_20148231_20148479_+_dCP_twist_center80	twist	ACCAGATGT	80	ETS	ACCGGAAGT	23	28	29	13	30	35	5.04633	5.14618	-0.0998481	2.03075	-3.11543	3.01558
chr2R_20148231_20148479_+_dCP_twist_center80_to_SREBP	chr2R_20148231_20148479	-	CTTATATCGGTTGCTATCAGCTCACTTACTGATTTCCGAGATGGCCTTATCAAGCCGCTTTATCAGCATCTGTTGATCACGCGACGTTTGTACACTATTTGCTCAGATTTTTTATTTTTTGTTGGCACTGTGCTATCAAGATGCAGTTGTTTTCAGAGGAAATGGCTTTATCAGTGTGAACTAAATAACGCGTTGAACACGCAAAGTAAATATGTAGTGGGTAAACAGGAATTAAACAACAAAATAGTT	chr2R_20148231_20148479_+_dCP_twist_center80	twist	ACCAGATGTA	80	SREBP	ATCACGCGAC	80	57	64	106	96	119	5.74613	5.14618	0.599951	2.03075	-3.11543	3.71538
chr2R_20148231_20148479_+_dCP_twist_center80_to_Stat92E	chr2R_20148231_20148479	-	CTTATATCGGTTGCTATCAGCTCACTTACTGATTTCCGAGATGGCCTTATCAAGCCGCTTTATCAGCATCTGTTTTTCCCGGAAAGTTTGTACACTATTTGCTCAGATTTTTTATTTTTTGTTGGCACTGTGCTATCAAGATGCAGTTGTTTTCAGAGGAAATGGCTTTATCAGTGTGAACTAAATAACGCGTTGAACACGCAAAGTAAATATGTAGTGGGTAAACAGGAATTAAACAACAAAATAGTT	chr2R_20148231_20148479_+_dCP_twist_center80	twist	GACCAGATGTA	80	Stat92E	TTTCCCGGAAA	52	64	51	26	20	25	3.81927	5.14618	-1.32692	2.03075	-3.11543	1.78851
chr2R_20148231_20148479_+_dCP_twist_center80_to_Atf2	chr2R_20148231_20148479	-	CTTATATCGGTTGCTATCAGCTCACTTACTGATTTCCGAGATGGCCTTATCAAGCCGCTTTATCAGCATCTGTTATCACGTCATCGTTTGTACACTATTTGCTCAGATTTTTTATTTTTTGTTGGCACTGTGCTATCAAGATGCAGTTGTTTTCAGAGGAAATGGCTTTATCAGTGTGAACTAAATAACGCGTTGAACACGCAAAGTAAATATGTAGTGGGTAAACAGGAATTAAACAACAAAATAGTT	chr2R_20148231_20148479_+_dCP_twist_center80	twist	GACCAGATGTA	80	Atf2	ATCACGTCATC	49	50	43	8	4	15	2.65168	5.14618	-2.4945	2.03075	-3.11543	0.620931
chr3R_21829282_21829530_+_Wnt_twist_center205_to_GATAA	chr3R_21829282_21829530	-	GCTCATAACTAGAATATTTCGTAAATTCTACACTGTAGCTTGCAAATAGCTATTATTAAACAGCATATAACGATTGCAATAATTTTTGAAGATTTCACCAAAGGTTGCAATTATTGAATGATCCCATTCCATGTTTTCGACCTCACCCAACCCACTTCGTATCTTGTGACAGGAGGTACAGTAGAGCCCACACGTCATCCAAGATAAGACCTCTGTGTGTCGGTGGACCCCCAATCGCAGGCACCGCGG	chr3R_21829282_21829530_+_Wnt_twist_center205	twist	TCACGTGA	205	GATAA	AGATAAGA	104	105	82	104	135	116	5.3807	5.16927	0.211429	2.44792	-2.72135	2.93278
chr3R_21829282_21829530_+_Wnt_twist_center205_to_AP1	chr3R_21829282_21829530	-	GCTCATAACTAGAATATTTCGTAAATTCTACACTGTAGCTTGCAAATAGCTATTATTAAACAGCATATAACGATTGCAATAATTTTTGAAGATTTCACCAAAGGTTGCAATTATTGAATGATCCCATTCCATGTTTTCGACCTCACCCAACCCACTTCGTATCTTGTGACAGGAGGTACAGTAGAGCCCACACGTCATCCATGAGTCACCCTCTGTGTGTCGGTGGACCCCCAATCGCAGGCACCGCGG	chr3R_21829282_21829530_+_Wnt_twist_center205	twist	ATCACGTGA	205	AP1	ATGAGTCAC	126	122	121	145	201	154	5.54053	5.16927	0.371257	2.44792	-2.72135	3.0926
chr3R_21829282_21829530_+_Wnt_twist_center205_to_Trl	chr3R_21829282_21829530	-	GCTCATAACTAGAATATTTCGTAAATTCTACACTGTAGCTTGCAAATAGCTATTATTAAACAGCATATAACGATTGCAATAATTTTTGAAGATTTCACCAAAGGTTGCAATTATTGAATGATCCCATTCCATGTTTTCGACCTCACCCAACCCACTTCGTATCTTGTGACAGGAGGTACAGTAGAGCCCACACGTCATCCAGAGAGAGACCTCTGTGTGTCGGTGGACCCCCAATCGCAGGCACCGCGG	chr3R_21829282_21829530_+_Wnt_twist_center205	twist	TCACGTG	205	Trl	GAGAGAG	149	123	121	29	43	46	3.34828	5.16927	-1.82098	2.44792	-2.72135	0.900363
chr3R_21829282_21829530_+_Wnt_twist_center205_to_ETS	chr3R_21829282_21829530	-	GCTCATAACTAGAATATTTCGTAAATTCTACACTGTAGCTTGCAAATAGCTATTATTAAACAGCATATAACGATTGCAATAATTTTTGAAGATTTCACCAAAGGTTGCAATTATTGAATGATCCCATTCCATGTTTTCGACCTCACCCAACCCACTTCGTATCTTGTGACAGGAGGTACAGTAGAGCCCACACGTCATCCACCGGAAGTCCTCTGTGTGTCGGTGGACCCCCAATCGCAGGCACCGCGG	chr3R_21829282_21829530_+_Wnt_twist_center205	twist	ATCACGTGA	205	ETS	ACCGGAAGT	84	83	65	30	36	30	3.80494	5.16927	-1.36433	2.44792	-2.72135	1.35702
chr3R_21829282_21829530_+_Wnt_twist_center205_to_SREBP	chr3R_21829282_21829530	-	GCTCATAACTAGAATATTTCGTAAATTCTACACTGTAGCTTGCAAATAGCTATTATTAAACAGCATATAACGATTGCAATAATTTTTGAAGATTTCACCAAAGGTTGCAATTATTGAATGATCCCATTCCATGTTTTCGACCTCACCCAACCCACTTCGTATCTTGTGACAGGAGGTACAGTAGAGCCCACACGTCATCCATCACGCGACCTCTGTGTGTCGGTGGACCCCCAATCGCAGGCACCGCGG	chr3R_21829282_21829530_+_Wnt_twist_center205	twist	ATCACGTGAC	205	SREBP	ATCACGCGAC	141	135	138	156	139	172	5.23734	5.16927	0.0680734	2.44792	-2.72135	2.78942
chr3R_21829282_21829530_+_Wnt_twist_center205_to_Stat92E	chr3R_21829282_21829530	-	GCTCATAACTAGAATATTTCGTAAATTCTACACTGTAGCTTGCAAATAGCTATTATTAAACAGCATATAACGATTGCAATAATTTTTGAAGATTTCACCAAAGGTTGCAATTATTGAATGATCCCATTCCATGTTTTCGACCTCACCCAACCCACTTCGTATCTTGTGACAGGAGGTACAGTAGAGCCCACACGTCATCTTTCCCGGAAACTCTGTGTGTCGGTGGACCCCCAATCGCAGGCACCGCGG	chr3R_21829282_21829530_+_Wnt_twist_center205	twist	CATCACGTGAC	205	Stat92E	TTTCCCGGAAA	71	44	51	31	43	67	4.84646	5.16927	-0.322811	2.44792	-2.72135	2.39854
chr3R_21829282_21829530_+_Wnt_twist_center205_to_Atf2	chr3R_21829282_21829530	-	GCTCATAACTAGAATATTTCGTAAATTCTACACTGTAGCTTGCAAATAGCTATTATTAAACAGCATATAACGATTGCAATAATTTTTGAAGATTTCACCAAAGGTTGCAATTATTGAATGATCCCATTCCATGTTTTCGACCTCACCCAACCCACTTCGTATCTTGTGACAGGAGGTACAGTAGAGCCCACACGTCATCATCACGTCATCCTCTGTGTGTCGGTGGACCCCCAATCGCAGGCACCGCGG	chr3R_21829282_21829530_+_Wnt_twist_center205	twist	CATCACGTGAC	205	Atf2	ATCACGTCATC	55	45	32	13	32	32	4.32881	5.16927	-0.840458	2.44792	-2.72135	1.88089
chr3L_16819615_16819863_+_dCP_twist_center67_to_GATAA	chr3L_16819615_16819863	-	ATTAAACCAGCTGCCAGCTGGAGATTATCTAATTTCGGGGGCATCTTCACGATAGACATACAAAGATAAGAGGCTCAAAGAGGAAGGAAGTTGTTGAAATAAGATGGAATTTTATCTGATCTGTAGACACGAGAAATGCTAATGACAAATATCTGAGTTTGAATTGCGAAAAAGATAGAGTGGTCGAAATAAAATATAACGAATGCTATAATGTTCCACTTTTTAAAAGATTTTGAATGCAATGTAACC	chr3L_16819615_16819863_+_dCP_twist_center67	twist	ACATATGT	67	GATAA	AGATAAGA	55	37	41	14	19	20	3.75001	4.95314	-1.20313	1.64859	-3.30455	2.10142
chr3L_16819615_16819863_+_dCP_twist_center67_to_AP1	chr3L_16819615_16819863	-	ATTAAACCAGCTGCCAGCTGGAGATTATCTAATTTCGGGGGCATCTTCACGATAGACATACAATGAGTCACGGCTCAAAGAGGAAGGAAGTTGTTGAAATAAGATGGAATTTTATCTGATCTGTAGACACGAGAAATGCTAATGACAAATATCTGAGTTTGAATTGCGAAAAAGATAGAGTGGTCGAAATAAAATATAACGAATGCTATAATGTTCCACTTTTTAAAAGATTTTGAATGCAATGTAACC	chr3L_16819615_16819863_+_dCP_twist_center67	twist	AACATATGT	67	AP1	ATGAGTCAC	30	25	20	60	49	62	6.25314	4.95314	1.3	1.64859	-3.30455	4.60455
chr3L_16819615_16819863_+_dCP_twist_center67_to_Trl	chr3L_16819615_16819863	-	ATTAAACCAGCTGCCAGCTGGAGATTATCTAATTTCGGGGGCATCTTCACGATAGACATACAAGAGAGAGTGGCTCAAAGAGGAAGGAAGTTGTTGAAATAAGATGGAATTTTATCTGATCTGTAGACACGAGAAATGCTAATGACAAATATCTGAGTTTGAATTGCGAAAAAGATAGAGTGGTCGAAATAAAATATAACGAATGCTATAATGTTCCACTTTTTAAAAGATTTTGAATGCAATGTAACC	chr3L_16819615_16819863_+_dCP_twist_center67	twist	ACATATG	67	Trl	GAGAGAG	20	10	12	2	1	0	1.67457	4.95314	-3.27858	1.64859	-3.30455	0.0259792
chr3L_16819615_16819863_+_dCP_twist_center67_to_ETS	chr3L_16819615_16819863	-	ATTAAACCAGCTGCCAGCTGGAGATTATCTAATTTCGGGGGCATCTTCACGATAGACATACAACCGGAAGTGGCTCAAAGAGGAAGGAAGTTGTTGAAATAAGATGGAATTTTATCTGATCTGTAGACACGAGAAATGCTAATGACAAATATCTGAGTTTGAATTGCGAAAAAGATAGAGTGGTCGAAATAAAATATAACGAATGCTATAATGTTCCACTTTTTAAAAGATTTTGAATGCAATGTAACC	chr3L_16819615_16819863_+_dCP_twist_center67	twist	AACATATGT	67	ETS	ACCGGAAGT	NA	NA	NA	NA	NA	NA	NA	4.95314	NA	1.64859	-3.30455	NA
chr3L_16819615_16819863_+_dCP_twist_center67_to_SREBP	chr3L_16819615_16819863	-	ATTAAACCAGCTGCCAGCTGGAGATTATCTAATTTCGGGGGCATCTTCACGATAGACATACAATCACGCGACGCTCAAAGAGGAAGGAAGTTGTTGAAATAAGATGGAATTTTATCTGATCTGTAGACACGAGAAATGCTAATGACAAATATCTGAGTTTGAATTGCGAAAAAGATAGAGTGGTCGAAATAAAATATAACGAATGCTATAATGTTCCACTTTTTAAAAGATTTTGAATGCAATGTAACC	chr3L_16819615_16819863_+_dCP_twist_center67	twist	AACATATGTG	67	SREBP	ATCACGCGAC	27	27	34	84	86	85	6.60756	4.95314	1.65441	1.64859	-3.30455	4.95897
chr3L_16819615_16819863_+_dCP_twist_center67_to_Stat92E	chr3L_16819615_16819863	-	ATTAAACCAGCTGCCAGCTGGAGATTATCTAATTTCGGGGGCATCTTCACGATAGACATACTTTCCCGGAAAGCTCAAAGAGGAAGGAAGTTGTTGAAATAAGATGGAATTTTATCTGATCTGTAGACACGAGAAATGCTAATGACAAATATCTGAGTTTGAATTGCGAAAAAGATAGAGTGGTCGAAATAAAATATAACGAATGCTATAATGTTCCACTTTTTAAAAGATTTTGAATGCAATGTAACC	chr3L_16819615_16819863_+_dCP_twist_center67	twist	AAACATATGTG	67	Stat92E	TTTCCCGGAAA	18	14	10	2	2	3	2.47875	4.95314	-2.47439	1.64859	-3.30455	0.830163
chr3L_16819615_16819863_+_dCP_twist_center67_to_Atf2	chr3L_16819615_16819863	-	ATTAAACCAGCTGCCAGCTGGAGATTATCTAATTTCGGGGGCATCTTCACGATAGACATACATCACGTCATCGCTCAAAGAGGAAGGAAGTTGTTGAAATAAGATGGAATTTTATCTGATCTGTAGACACGAGAAATGCTAATGACAAATATCTGAGTTTGAATTGCGAAAAAGATAGAGTGGTCGAAATAAAATATAACGAATGCTATAATGTTCCACTTTTTAAAAGATTTTGAATGCAATGTAACC	chr3L_16819615_16819863_+_dCP_twist_center67	twist	AAACATATGTG	67	Atf2	ATCACGTCATC	NA	NA	NA	NA	NA	NA	NA	4.95314	NA	1.64859	-3.30455	NA
chr3R_26292193_26292441_+_dCP_twist_center142_to_GATAA	chr3R_26292193_26292441	+	TTTACTTGAATGACGGGAATGTGGGCCATCTAAATTGAATATTCGATTTTGATTAGAGAGAAATGCTCTGCTGCGCTGTGACAAAAAAACTAAACTGATTTGAGTGTTCACATACTATTCTATATGCACTTGTTGTCAAGATAAGACGATTCAATTGACCGCTTTTTGCCCCCACATATTCCCCATTTCCTACTGCTGATGCTCCTCCCTCCTCCTCCATCTCCGCTGGCGATAAGCCTCTAAATATCT	chr3R_26292193_26292441_+_dCP_twist_center142	twist	CCACATGG	142	GATAA	AGATAAGA	165	150	151	52	42	51	3.37598	4.63983	-1.26385	1.55974	-3.08009	1.81624
chr3R_26292193_26292441_+_dCP_twist_center142_to_AP1	chr3R_26292193_26292441	+	TTTACTTGAATGACGGGAATGTGGGCCATCTAAATTGAATATTCGATTTTGATTAGAGAGAAATGCTCTGCTGCGCTGTGACAAAAAAACTAAACTGATTTGAGTGTTCACATACTATTCTATATGCACTTGTTGTCATGAGTCACCGATTCAATTGACCGCTTTTTGCCCCCACATATTCCCCATTTCCTACTGCTGATGCTCCTCCCTCCTCCTCCATCTCCGCTGGCGATAAGCCTCTAAATATCT	chr3R_26292193_26292441_+_dCP_twist_center142	twist	ACCACATGG	142	AP1	ATGAGTCAC	205	172	175	106	68	113	4.10698	4.63983	-0.532845	1.55974	-3.08009	2.54725
chr3R_26292193_26292441_+_dCP_twist_center142_to_Trl	chr3R_26292193_26292441	+	TTTACTTGAATGACGGGAATGTGGGCCATCTAAATTGAATATTCGATTTTGATTAGAGAGAAATGCTCTGCTGCGCTGTGACAAAAAAACTAAACTGATTTGAGTGTTCACATACTATTCTATATGCACTTGTTGTCAGAGAGAGGCGATTCAATTGACCGCTTTTTGCCCCCACATATTCCCCATTTCCTACTGCTGATGCTCCTCCCTCCTCCTCCATCTCCGCTGGCGATAAGCCTCTAAATATCT	chr3R_26292193_26292441_+_dCP_twist_center142	twist	CCACATG	142	Trl	GAGAGAG	237	217	216	39	27	46	2.47169	4.63983	-2.16814	1.55974	-3.08009	0.911954
chr3R_26292193_26292441_+_dCP_twist_center142_to_ETS	chr3R_26292193_26292441	+	TTTACTTGAATGACGGGAATGTGGGCCATCTAAATTGAATATTCGATTTTGATTAGAGAGAAATGCTCTGCTGCGCTGTGACAAAAAAACTAAACTGATTTGAGTGTTCACATACTATTCTATATGCACTTGTTGTCACCGGAAGTCGATTCAATTGACCGCTTTTTGCCCCCACATATTCCCCATTTCCTACTGCTGATGCTCCTCCCTCCTCCTCCATCTCCGCTGGCGATAAGCCTCTAAATATCT	chr3R_26292193_26292441_+_dCP_twist_center142	twist	ACCACATGG	142	ETS	ACCGGAAGT	215	175	192	41	22	32	2.43704	4.63983	-2.20279	1.55974	-3.08009	0.877298
chr3R_26292193_26292441_+_dCP_twist_center142_to_SREBP	chr3R_26292193_26292441	+	TTTACTTGAATGACGGGAATGTGGGCCATCTAAATTGAATATTCGATTTTGATTAGAGAGAAATGCTCTGCTGCGCTGTGACAAAAAAACTAAACTGATTTGAGTGTTCACATACTATTCTATATGCACTTGTTGTCATCACGCGACGATTCAATTGACCGCTTTTTGCCCCCACATATTCCCCATTTCCTACTGCTGATGCTCCTCCCTCCTCCTCCATCTCCGCTGGCGATAAGCCTCTAAATATCT	chr3R_26292193_26292441_+_dCP_twist_center142	twist	ACCACATGGC	142	SREBP	ATCACGCGAC	141	130	118	81	75	94	4.42797	4.63983	-0.211858	1.55974	-3.08009	2.86823
chr3R_26292193_26292441_+_dCP_twist_center142_to_Stat92E	chr3R_26292193_26292441	+	TTTACTTGAATGACGGGAATGTGGGCCATCTAAATTGAATATTCGATTTTGATTAGAGAGAAATGCTCTGCTGCGCTGTGACAAAAAAACTAAACTGATTTGAGTGTTCACATACTATTCTATATGCACTTGTTGTTTTCCCGGAAAGATTCAATTGACCGCTTTTTGCCCCCACATATTCCCCATTTCCTACTGCTGATGCTCCTCCCTCCTCCTCCATCTCCGCTGGCGATAAGCCTCTAAATATCT	chr3R_26292193_26292441_+_dCP_twist_center142	twist	CACCACATGGC	142	Stat92E	TTTCCCGGAAA	364	265	298	152	98	143	3.8181	4.63983	-0.821728	1.55974	-3.08009	2.25836
chr3R_26292193_26292441_+_dCP_twist_center142_to_Atf2	chr3R_26292193_26292441	+	TTTACTTGAATGACGGGAATGTGGGCCATCTAAATTGAATATTCGATTTTGATTAGAGAGAAATGCTCTGCTGCGCTGTGACAAAAAAACTAAACTGATTTGAGTGTTCACATACTATTCTATATGCACTTGTTGTATCACGTCATCGATTCAATTGACCGCTTTTTGCCCCCACATATTCCCCATTTCCTACTGCTGATGCTCCTCCCTCCTCCTCCATCTCCGCTGGCGATAAGCCTCTAAATATCT	chr3R_26292193_26292441_+_dCP_twist_center142	twist	CACCACATGGC	142	Atf2	ATCACGTCATC	150	130	113	25	21	37	2.81586	4.63983	-1.82397	1.55974	-3.08009	1.25612
chr3L_10675087_10675335_+_dCP_twist_center109_to_GATAA	chr3L_10675087_10675335	-	AAGTGACCAAAGGAGATAAAAAGCGGATGGGGGAAACGAACTTAGAGGCGAATGACAAGCGACGACGACGCAAACAAGCAAAAGAAATAAGGTTAAATCAAAAGTAGATAAGAGTACATAGCGCGGCCAGCAGCAGCACCAACAAAAGCAACAACAACGGCAACAGCAACAGCAACAACAACACAAACAAAAGCGAAGAGCAACAGCAAAGCAAGCGAAATGTGTTTGAGTGTGGCTGCGGTGAGAGCG	chr3L_10675087_10675335_+_dCP_twist_center109	twist	ACAGTTGT	109	GATAA	AGATAAGA	NA	NA	NA	NA	NA	NA	NA	5.72295	NA	2.01489	-3.70806	NA
chr3L_10675087_10675335_+_dCP_twist_center109_to_AP1	chr3L_10675087_10675335	-	AAGTGACCAAAGGAGATAAAAAGCGGATGGGGGAAACGAACTTAGAGGCGAATGACAAGCGACGACGACGCAAACAAGCAAAAGAAATAAGGTTAAATCAAAAGATGAGTCACGTACATAGCGCGGCCAGCAGCAGCACCAACAAAAGCAACAACAACGGCAACAGCAACAGCAACAACAACACAAACAAAAGCGAAGAGCAACAGCAAAGCAAGCGAAATGTGTTTGAGTGTGGCTGCGGTGAGAGCG	chr3L_10675087_10675335_+_dCP_twist_center109	twist	TACAGTTGT	109	AP1	ATGAGTCAC	NA	NA	NA	NA	NA	NA	NA	5.72295	NA	2.01489	-3.70806	NA
chr3L_10675087_10675335_+_dCP_twist_center109_to_Trl	chr3L_10675087_10675335	-	AAGTGACCAAAGGAGATAAAAAGCGGATGGGGGAAACGAACTTAGAGGCGAATGACAAGCGACGACGACGCAAACAAGCAAAAGAAATAAGGTTAAATCAAAAGTGAGAGAGTGTACATAGCGCGGCCAGCAGCAGCACCAACAAAAGCAACAACAACGGCAACAGCAACAGCAACAACAACACAAACAAAAGCGAAGAGCAACAGCAAAGCAAGCGAAATGTGTTTGAGTGTGGCTGCGGTGAGAGCG	chr3L_10675087_10675335_+_dCP_twist_center109	twist	ACAGTTG	109	Trl	GAGAGAG	NA	NA	NA	NA	NA	NA	NA	5.72295	NA	2.01489	-3.70806	NA
chr3L_10675087_10675335_+_dCP_twist_center109_to_ETS	chr3L_10675087_10675335	-	AAGTGACCAAAGGAGATAAAAAGCGGATGGGGGAAACGAACTTAGAGGCGAATGACAAGCGACGACGACGCAAACAAGCAAAAGAAATAAGGTTAAATCAAAAGACCGGAAGTGTACATAGCGCGGCCAGCAGCAGCACCAACAAAAGCAACAACAACGGCAACAGCAACAGCAACAACAACACAAACAAAAGCGAAGAGCAACAGCAAAGCAAGCGAAATGTGTTTGAGTGTGGCTGCGGTGAGAGCG	chr3L_10675087_10675335_+_dCP_twist_center109	twist	TACAGTTGT	109	ETS	ACCGGAAGT	36	27	37	16	22	26	4.42854	5.72295	-1.29441	2.01489	-3.70806	2.41365
chr3L_10675087_10675335_+_dCP_twist_center109_to_SREBP	chr3L_10675087_10675335	-	AAGTGACCAAAGGAGATAAAAAGCGGATGGGGGAAACGAACTTAGAGGCGAATGACAAGCGACGACGACGCAAACAAGCAAAAGAAATAAGGTTAAATCAAAAGATCACGCGACTACATAGCGCGGCCAGCAGCAGCACCAACAAAAGCAACAACAACGGCAACAGCAACAGCAACAACAACACAAACAAAAGCGAAGAGCAACAGCAAAGCAAGCGAAATGTGTTTGAGTGTGGCTGCGGTGAGAGCG	chr3L_10675087_10675335_+_dCP_twist_center109	twist	TACAGTTGTG	109	SREBP	ATCACGCGAC	12	18	16	55	62	65	7.05529	5.72295	1.33234	2.01489	-3.70806	5.04041
chr3L_10675087_10675335_+_dCP_twist_center109_to_Stat92E	chr3L_10675087_10675335	-	AAGTGACCAAAGGAGATAAAAAGCGGATGGGGGAAACGAACTTAGAGGCGAATGACAAGCGACGACGACGCAAACAAGCAAAAGAAATAAGGTTAAATCAAAATTTCCCGGAAATACATAGCGCGGCCAGCAGCAGCACCAACAAAAGCAACAACAACGGCAACAGCAACAGCAACAACAACACAAACAAAAGCGAAGAGCAACAGCAAAGCAAGCGAAATGTGTTTGAGTGTGGCTGCGGTGAGAGCG	chr3L_10675087_10675335_+_dCP_twist_center109	twist	GTACAGTTGTG	109	Stat92E	TTTCCCGGAAA	NA	NA	NA	NA	NA	NA	NA	5.72295	NA	2.01489	-3.70806	NA
chr3L_10675087_10675335_+_dCP_twist_center109_to_Atf2	chr3L_10675087_10675335	-	AAGTGACCAAAGGAGATAAAAAGCGGATGGGGGAAACGAACTTAGAGGCGAATGACAAGCGACGACGACGCAAACAAGCAAAAGAAATAAGGTTAAATCAAAAATCACGTCATCTACATAGCGCGGCCAGCAGCAGCACCAACAAAAGCAACAACAACGGCAACAGCAACAGCAACAACAACACAAACAAAAGCGAAGAGCAACAGCAAAGCAAGCGAAATGTGTTTGAGTGTGGCTGCGGTGAGAGCG	chr3L_10675087_10675335_+_dCP_twist_center109	twist	GTACAGTTGTG	109	Atf2	ATCACGTCATC	NA	NA	NA	NA	NA	NA	NA	5.72295	NA	2.01489	-3.70806	NA
chr3L_5571497_5571745_+_dCP_twist_center81_to_GATAA	chr3L_5571497_5571745	+	CTTGCCCCAACACAGATGCAGAATGCCTAACCTGGCATTTGCTGGCGACTACAAATACTCATCTTGATTGCCACCGAAGATAAGAGCCGCCTGCTGTTTGCTTAGATTGTCCATTATTTTGAACAATTCTGGGAATTGCTTTTAATATTATTAATAATAAGAAGCATGATAAGACTTTCGGTGCTCACTATCGAAACAGTGTTCTGAGTCGGCTATTGCTCATACGCCATGTTGGCCAGAAACCAGTTT	chr3L_5571497_5571745_+_dCP_twist_center81	twist	ACAGCTGC	81	GATAA	AGATAAGA	50	54	55	1	2	3	0.326924	4.16656	-3.83964	1.40867	-2.7579	-1.08174
chr3L_5571497_5571745_+_dCP_twist_center81_to_AP1	chr3L_5571497_5571745	+	CTTGCCCCAACACAGATGCAGAATGCCTAACCTGGCATTTGCTGGCGACTACAAATACTCATCTTGATTGCCACCGATGAGTCACGCCGCCTGCTGTTTGCTTAGATTGTCCATTATTTTGAACAATTCTGGGAATTGCTTTTAATATTATTAATAATAAGAAGCATGATAAGACTTTCGGTGCTCACTATCGAAACAGTGTTCTGAGTCGGCTATTGCTCATACGCCATGTTGGCCAGAAACCAGTTT	chr3L_5571497_5571745_+_dCP_twist_center81	twist	AACAGCTGC	81	AP1	ATGAGTCAC	83	66	48	28	37	41	4.19127	4.16656	0.0247042	1.40867	-2.7579	2.7826
chr3L_5571497_5571745_+_dCP_twist_center81_to_Trl	chr3L_5571497_5571745	+	CTTGCCCCAACACAGATGCAGAATGCCTAACCTGGCATTTGCTGGCGACTACAAATACTCATCTTGATTGCCACCGAGAGAGAGCGCCGCCTGCTGTTTGCTTAGATTGTCCATTATTTTGAACAATTCTGGGAATTGCTTTTAATATTATTAATAATAAGAAGCATGATAAGACTTTCGGTGCTCACTATCGAAACAGTGTTCTGAGTCGGCTATTGCTCATACGCCATGTTGGCCAGAAACCAGTTT	chr3L_5571497_5571745_+_dCP_twist_center81	twist	ACAGCTG	81	Trl	GAGAGAG	185	164	158	29	24	28	2.41573	4.16656	-1.75083	1.40867	-2.7579	1.00707
chr3L_5571497_5571745_+_dCP_twist_center81_to_ETS	chr3L_5571497_5571745	+	CTTGCCCCAACACAGATGCAGAATGCCTAACCTGGCATTTGCTGGCGACTACAAATACTCATCTTGATTGCCACCGACCGGAAGTGCCGCCTGCTGTTTGCTTAGATTGTCCATTATTTTGAACAATTCTGGGAATTGCTTTTAATATTATTAATAATAAGAAGCATGATAAGACTTTCGGTGCTCACTATCGAAACAGTGTTCTGAGTCGGCTATTGCTCATACGCCATGTTGGCCAGAAACCAGTTT	chr3L_5571497_5571745_+_dCP_twist_center81	twist	AACAGCTGC	81	ETS	ACCGGAAGT	75	85	70	145	143	142	5.97512	4.16656	1.80855	1.40867	-2.7579	4.56645
chr3L_5571497_5571745_+_dCP_twist_center81_to_SREBP	chr3L_5571497_5571745	+	CTTGCCCCAACACAGATGCAGAATGCCTAACCTGGCATTTGCTGGCGACTACAAATACTCATCTTGATTGCCACCGATCACGCGACCCGCCTGCTGTTTGCTTAGATTGTCCATTATTTTGAACAATTCTGGGAATTGCTTTTAATATTATTAATAATAAGAAGCATGATAAGACTTTCGGTGCTCACTATCGAAACAGTGTTCTGAGTCGGCTATTGCTCATACGCCATGTTGGCCAGAAACCAGTTT	chr3L_5571497_5571745_+_dCP_twist_center81	twist	AACAGCTGCG	81	SREBP	ATCACGCGAC	90	72	75	54	63	59	4.65307	4.16656	0.486507	1.40867	-2.7579	3.24441
chr3L_5571497_5571745_+_dCP_twist_center81_to_Stat92E	chr3L_5571497_5571745	+	CTTGCCCCAACACAGATGCAGAATGCCTAACCTGGCATTTGCTGGCGACTACAAATACTCATCTTGATTGCCACCTTTCCCGGAAACCGCCTGCTGTTTGCTTAGATTGTCCATTATTTTGAACAATTCTGGGAATTGCTTTTAATATTATTAATAATAAGAAGCATGATAAGACTTTCGGTGCTCACTATCGAAACAGTGTTCTGAGTCGGCTATTGCTCATACGCCATGTTGGCCAGAAACCAGTTT	chr3L_5571497_5571745_+_dCP_twist_center81	twist	GAACAGCTGCG	81	Stat92E	TTTCCCGGAAA	71	74	72	19	14	14	2.849	4.16656	-1.31756	1.40867	-2.7579	1.44034
chr3L_5571497_5571745_+_dCP_twist_center81_to_Atf2	chr3L_5571497_5571745	+	CTTGCCCCAACACAGATGCAGAATGCCTAACCTGGCATTTGCTGGCGACTACAAATACTCATCTTGATTGCCACCATCACGTCATCCCGCCTGCTGTTTGCTTAGATTGTCCATTATTTTGAACAATTCTGGGAATTGCTTTTAATATTATTAATAATAAGAAGCATGATAAGACTTTCGGTGCTCACTATCGAAACAGTGTTCTGAGTCGGCTATTGCTCATACGCCATGTTGGCCAGAAACCAGTTT	chr3L_5571497_5571745_+_dCP_twist_center81	twist	GAACAGCTGCG	81	Atf2	ATCACGTCATC	91	85	94	37	33	42	3.79045	4.16656	-0.376115	1.40867	-2.7579	2.38178
chr3L_4121757_4122005_+_dCP_twist_center168_to_GATAA	chr3L_4121757_4122005	-	GCTGCGTTGTCAAGATTTTATCTTCGCGCGCCAAATGCCAAAAATTAGCCAAAAATGGTCTTGAAATTGCCAGCGTCTAACAAGGAATGACCTCATTTCGCTGATAAGTCGAACAAGTATTTATGTACATACATATGTATATAGGAATATATACATGCATGTACAGATAAGAGTAATGCATGCGTAATTCGAAAGCTTGAAGATGATTTAGGTGATTTTGAGGCATTGTCAGTGCGGGTGATTCAAATC	chr3L_4121757_4122005_+_dCP_twist_center168	twist	ACACATGT	168	GATAA	AGATAAGA	120	83	78	199	249	282	6.47334	5.44252	1.03082	2.35221	-3.09031	4.12113
chr3L_4121757_4122005_+_dCP_twist_center168_to_AP1	chr3L_4121757_4122005	-	GCTGCGTTGTCAAGATTTTATCTTCGCGCGCCAAATGCCAAAAATTAGCCAAAAATGGTCTTGAAATTGCCAGCGTCTAACAAGGAATGACCTCATTTCGCTGATAAGTCGAACAAGTATTTATGTACATACATATGTATATAGGAATATATACATGCATGTAATGAGTCACGTAATGCATGCGTAATTCGAAAGCTTGAAGATGATTTAGGTGATTTTGAGGCATTGTCAGTGCGGGTGATTCAAATC	chr3L_4121757_4122005_+_dCP_twist_center168	twist	CACACATGT	168	AP1	ATGAGTCAC	46	26	48	74	106	107	6.35622	5.44252	0.913699	2.35221	-3.09031	4.00401
chr3L_4121757_4122005_+_dCP_twist_center168_to_Trl	chr3L_4121757_4122005	-	GCTGCGTTGTCAAGATTTTATCTTCGCGCGCCAAATGCCAAAAATTAGCCAAAAATGGTCTTGAAATTGCCAGCGTCTAACAAGGAATGACCTCATTTCGCTGATAAGTCGAACAAGTATTTATGTACATACATATGTATATAGGAATATATACATGCATGTACGAGAGAGTGTAATGCATGCGTAATTCGAAAGCTTGAAGATGATTTAGGTGATTTTGAGGCATTGTCAGTGCGGGTGATTCAAATC	chr3L_4121757_4122005_+_dCP_twist_center168	twist	ACACATG	168	Trl	GAGAGAG	55	51	49	33	21	34	4.23558	5.44252	-1.20695	2.35221	-3.09031	1.88337
chr3L_4121757_4122005_+_dCP_twist_center168_to_ETS	chr3L_4121757_4122005	-	GCTGCGTTGTCAAGATTTTATCTTCGCGCGCCAAATGCCAAAAATTAGCCAAAAATGGTCTTGAAATTGCCAGCGTCTAACAAGGAATGACCTCATTTCGCTGATAAGTCGAACAAGTATTTATGTACATACATATGTATATAGGAATATATACATGCATGTAACCGGAAGTGTAATGCATGCGTAATTCGAAAGCTTGAAGATGATTTAGGTGATTTTGAGGCATTGTCAGTGCGGGTGATTCAAATC	chr3L_4121757_4122005_+_dCP_twist_center168	twist	CACACATGT	168	ETS	ACCGGAAGT	41	43	33	6	6	8	2.51059	5.44252	-2.93194	2.35221	-3.09031	0.158376
chr3L_4121757_4122005_+_dCP_twist_center168_to_SREBP	chr3L_4121757_4122005	-	GCTGCGTTGTCAAGATTTTATCTTCGCGCGCCAAATGCCAAAAATTAGCCAAAAATGGTCTTGAAATTGCCAGCGTCTAACAAGGAATGACCTCATTTCGCTGATAAGTCGAACAAGTATTTATGTACATACATATGTATATAGGAATATATACATGCATGTAATCACGCGACTAATGCATGCGTAATTCGAAAGCTTGAAGATGATTTAGGTGATTTTGAGGCATTGTCAGTGCGGGTGATTCAAATC	chr3L_4121757_4122005_+_dCP_twist_center168	twist	CACACATGTG	168	SREBP	ATCACGCGAC	86	75	90	266	300	353	6.9507	5.44252	1.50818	2.35221	-3.09031	4.59849
chr3L_4121757_4122005_+_dCP_twist_center168_to_Stat92E	chr3L_4121757_4122005	-	GCTGCGTTGTCAAGATTTTATCTTCGCGCGCCAAATGCCAAAAATTAGCCAAAAATGGTCTTGAAATTGCCAGCGTCTAACAAGGAATGACCTCATTTCGCTGATAAGTCGAACAAGTATTTATGTACATACATATGTATATAGGAATATATACATGCATGTTTTCCCGGAAATAATGCATGCGTAATTCGAAAGCTTGAAGATGATTTAGGTGATTTTGAGGCATTGTCAGTGCGGGTGATTCAAATC	chr3L_4121757_4122005_+_dCP_twist_center168	twist	ACACACATGTG	168	Stat92E	TTTCCCGGAAA	55	32	42	88	158	175	6.81764	5.44252	1.37511	2.35221	-3.09031	4.46543
chr3L_4121757_4122005_+_dCP_twist_center168_to_Atf2	chr3L_4121757_4122005	-	GCTGCGTTGTCAAGATTTTATCTTCGCGCGCCAAATGCCAAAAATTAGCCAAAAATGGTCTTGAAATTGCCAGCGTCTAACAAGGAATGACCTCATTTCGCTGATAAGTCGAACAAGTATTTATGTACATACATATGTATATAGGAATATATACATGCATGTATCACGTCATCTAATGCATGCGTAATTCGAAAGCTTGAAGATGATTTAGGTGATTTTGAGGCATTGTCAGTGCGGGTGATTCAAATC	chr3L_4121757_4122005_+_dCP_twist_center168	twist	ACACACATGTG	168	Atf2	ATCACGTCATC	118	89	91	149	135	214	5.80599	5.44252	0.363462	2.35221	-3.09031	3.45377
chr3R_18457294_18457542_+_dCP_twist_center113_to_GATAA	chr3R_18457294_18457542	-	GTGGGGAGAACAATGAGACGCAGTACGCGAAATCACTTTGATCTATTGTCGTCACTGGAAATCCATTCGAATTCAGTTAGTCACGCGTTATTTTTCTATAGAATAAAGAAGATAAGATGGCTTTCAAAGTCAGGCGATAGAGCCCAAGTCAAGATTAGAACCCTTATTCATTCATGAAAATATGTATTAATTGCATTAATAATCGAAATTCACTTGTATACGACAGCTGGAATGCTCTAAGAACACCTT	chr3R_18457294_18457542_+_dCP_twist_center113	twist	ACATATGA	113	GATAA	AGATAAGA	31	23	24	34	48	53	5.8768	4.79592	1.08088	2.53215	-2.26376	3.34464
chr3R_18457294_18457542_+_dCP_twist_center113_to_AP1	chr3R_18457294_18457542	-	GTGGGGAGAACAATGAGACGCAGTACGCGAAATCACTTTGATCTATTGTCGTCACTGGAAATCCATTCGAATTCAGTTAGTCACGCGTTATTTTTCTATAGAATAAAGATGAGTCACTGGCTTTCAAAGTCAGGCGATAGAGCCCAAGTCAAGATTAGAACCCTTATTCATTCATGAAAATATGTATTAATTGCATTAATAATCGAAATTCACTTGTATACGACAGCTGGAATGCTCTAAGAACACCTT	chr3R_18457294_18457542_+_dCP_twist_center113	twist	AACATATGA	113	AP1	ATGAGTCAC	16	12	26	43	71	79	6.92638	4.79592	2.13047	2.53215	-2.26376	4.39423
chr3R_18457294_18457542_+_dCP_twist_center113_to_Trl	chr3R_18457294_18457542	-	GTGGGGAGAACAATGAGACGCAGTACGCGAAATCACTTTGATCTATTGTCGTCACTGGAAATCCATTCGAATTCAGTTAGTCACGCGTTATTTTTCTATAGAATAAAGAGAGAGAGATGGCTTTCAAAGTCAGGCGATAGAGCCCAAGTCAAGATTAGAACCCTTATTCATTCATGAAAATATGTATTAATTGCATTAATAATCGAAATTCACTTGTATACGACAGCTGGAATGCTCTAAGAACACCTT	chr3R_18457294_18457542_+_dCP_twist_center113	twist	ACATATG	113	Trl	GAGAGAG	24	24	20	14	10	21	4.457	4.79592	-0.338918	2.53215	-2.26376	1.92484
chr3R_18457294_18457542_+_dCP_twist_center113_to_ETS	chr3R_18457294_18457542	-	GTGGGGAGAACAATGAGACGCAGTACGCGAAATCACTTTGATCTATTGTCGTCACTGGAAATCCATTCGAATTCAGTTAGTCACGCGTTATTTTTCTATAGAATAAAGACCGGAAGTTGGCTTTCAAAGTCAGGCGATAGAGCCCAAGTCAAGATTAGAACCCTTATTCATTCATGAAAATATGTATTAATTGCATTAATAATCGAAATTCACTTGTATACGACAGCTGGAATGCTCTAAGAACACCTT	chr3R_18457294_18457542_+_dCP_twist_center113	twist	AACATATGA	113	ETS	ACCGGAAGT	53	52	41	227	309	376	7.73025	4.79592	2.93433	2.53215	-2.26376	5.1981
chr3R_18457294_18457542_+_dCP_twist_center113_to_SREBP	chr3R_18457294_18457542	-	GTGGGGAGAACAATGAGACGCAGTACGCGAAATCACTTTGATCTATTGTCGTCACTGGAAATCCATTCGAATTCAGTTAGTCACGCGTTATTTTTCTATAGAATAAAGATCACGCGACGGCTTTCAAAGTCAGGCGATAGAGCCCAAGTCAAGATTAGAACCCTTATTCATTCATGAAAATATGTATTAATTGCATTAATAATCGAAATTCACTTGTATACGACAGCTGGAATGCTCTAAGAACACCTT	chr3R_18457294_18457542_+_dCP_twist_center113	twist	AACATATGAT	113	SREBP	ATCACGCGAC	25	17	23	43	79	59	6.5937	4.79592	1.79779	2.53215	-2.26376	4.06155
chr3R_18457294_18457542_+_dCP_twist_center113_to_Stat92E	chr3R_18457294_18457542	-	GTGGGGAGAACAATGAGACGCAGTACGCGAAATCACTTTGATCTATTGTCGTCACTGGAAATCCATTCGAATTCAGTTAGTCACGCGTTATTTTTCTATAGAATAAATTTCCCGGAAAGGCTTTCAAAGTCAGGCGATAGAGCCCAAGTCAAGATTAGAACCCTTATTCATTCATGAAAATATGTATTAATTGCATTAATAATCGAAATTCACTTGTATACGACAGCTGGAATGCTCTAAGAACACCTT	chr3R_18457294_18457542_+_dCP_twist_center113	twist	GAACATATGAT	113	Stat92E	TTTCCCGGAAA	15	18	17	1	0	1	0.995372	4.79592	-3.80054	2.53215	-2.26376	-1.53678
chr3R_18457294_18457542_+_dCP_twist_center113_to_Atf2	chr3R_18457294_18457542	-	GTGGGGAGAACAATGAGACGCAGTACGCGAAATCACTTTGATCTATTGTCGTCACTGGAAATCCATTCGAATTCAGTTAGTCACGCGTTATTTTTCTATAGAATAAAATCACGTCATCGGCTTTCAAAGTCAGGCGATAGAGCCCAAGTCAAGATTAGAACCCTTATTCATTCATGAAAATATGTATTAATTGCATTAATAATCGAAATTCACTTGTATACGACAGCTGGAATGCTCTAAGAACACCTT	chr3R_18457294_18457542_+_dCP_twist_center113	twist	GAACATATGAT	113	Atf2	ATCACGTCATC	17	23	18	34	59	69	6.56554	4.79592	1.76963	2.53215	-2.26376	4.03339
chr2L_20651976_20652224_+_dCP_twist_center90_to_GATAA	chr2L_20651976_20652224	+	GTCCGTCCCCGTTAACAGCCACTTGATTTTCACCCTTTCAGCTATATGAATTGAGCAGAGCTTACTCAGAGCATCGTTAAACGACAAGATAAGAGTCCGGAAGCAGAGTTCTAGTAAAAAGATAAGCACAAATAGTGAATGAGCTCATATTAAGCGGGATTCATCATACCCCTCTCCAGATTCTCAGCTACCTCGGCCGCCCGAGCAGCCACCACTTTCTCCAAGGAGCACCGATCCACGGGTATGGGC	chr2L_20651976_20652224_+_dCP_twist_center90	twist	GCAGCTGC	90	GATAA	AGATAAGA	79	84	66	59	50	66	4.67124	4.14712	0.524122	1.53722	-2.6099	3.13402
chr2L_20651976_20652224_+_dCP_twist_center90_to_AP1	chr2L_20651976_20652224	+	GTCCGTCCCCGTTAACAGCCACTTGATTTTCACCCTTTCAGCTATATGAATTGAGCAGAGCTTACTCAGAGCATCGTTAAACGACATGAGTCACGTCCGGAAGCAGAGTTCTAGTAAAAAGATAAGCACAAATAGTGAATGAGCTCATATTAAGCGGGATTCATCATACCCCTCTCCAGATTCTCAGCTACCTCGGCCGCCCGAGCAGCCACCACTTTCTCCAAGGAGCACCGATCCACGGGTATGGGC	chr2L_20651976_20652224_+_dCP_twist_center90	twist	AGCAGCTGC	90	AP1	ATGAGTCAC	278	246	229	231	300	333	5.2884	4.14712	1.14128	1.53722	-2.6099	3.75118
chr2L_20651976_20652224_+_dCP_twist_center90_to_Trl	chr2L_20651976_20652224	+	GTCCGTCCCCGTTAACAGCCACTTGATTTTCACCCTTTCAGCTATATGAATTGAGCAGAGCTTACTCAGAGCATCGTTAAACGACAGAGAGAGCGTCCGGAAGCAGAGTTCTAGTAAAAAGATAAGCACAAATAGTGAATGAGCTCATATTAAGCGGGATTCATCATACCCCTCTCCAGATTCTCAGCTACCTCGGCCGCCCGAGCAGCCACCACTTTCTCCAAGGAGCACCGATCCACGGGTATGGGC	chr2L_20651976_20652224_+_dCP_twist_center90	twist	GCAGCTG	90	Trl	GAGAGAG	341	296	292	115	122	134	3.75244	4.14712	-0.39468	1.53722	-2.6099	2.21522
chr2L_20651976_20652224_+_dCP_twist_center90_to_ETS	chr2L_20651976_20652224	+	GTCCGTCCCCGTTAACAGCCACTTGATTTTCACCCTTTCAGCTATATGAATTGAGCAGAGCTTACTCAGAGCATCGTTAAACGACACCGGAAGTGTCCGGAAGCAGAGTTCTAGTAAAAAGATAAGCACAAATAGTGAATGAGCTCATATTAAGCGGGATTCATCATACCCCTCTCCAGATTCTCAGCTACCTCGGCCGCCCGAGCAGCCACCACTTTCTCCAAGGAGCACCGATCCACGGGTATGGGC	chr2L_20651976_20652224_+_dCP_twist_center90	twist	AGCAGCTGC	90	ETS	ACCGGAAGT	83	86	83	9	10	15	2.16736	4.14712	-1.97976	1.53722	-2.6099	0.630139
chr2L_20651976_20652224_+_dCP_twist_center90_to_SREBP	chr2L_20651976_20652224	+	GTCCGTCCCCGTTAACAGCCACTTGATTTTCACCCTTTCAGCTATATGAATTGAGCAGAGCTTACTCAGAGCATCGTTAAACGACATCACGCGACTCCGGAAGCAGAGTTCTAGTAAAAAGATAAGCACAAATAGTGAATGAGCTCATATTAAGCGGGATTCATCATACCCCTCTCCAGATTCTCAGCTACCTCGGCCGCCCGAGCAGCCACCACTTTCTCCAAGGAGCACCGATCCACGGGTATGGGC	chr2L_20651976_20652224_+_dCP_twist_center90	twist	AGCAGCTGCG	90	SREBP	ATCACGCGAC	120	112	112	31	32	20	3.02408	4.14712	-1.12304	1.53722	-2.6099	1.48686
chr2L_20651976_20652224_+_dCP_twist_center90_to_Stat92E	chr2L_20651976_20652224	+	GTCCGTCCCCGTTAACAGCCACTTGATTTTCACCCTTTCAGCTATATGAATTGAGCAGAGCTTACTCAGAGCATCGTTAAACGATTTCCCGGAAATCCGGAAGCAGAGTTCTAGTAAAAAGATAAGCACAAATAGTGAATGAGCTCATATTAAGCGGGATTCATCATACCCCTCTCCAGATTCTCAGCTACCTCGGCCGCCCGAGCAGCCACCACTTTCTCCAAGGAGCACCGATCCACGGGTATGGGC	chr2L_20651976_20652224_+_dCP_twist_center90	twist	CAGCAGCTGCG	90	Stat92E	TTTCCCGGAAA	88	66	95	13	7	9	1.95238	4.14712	-2.19474	1.53722	-2.6099	0.41516
chr2L_20651976_20652224_+_dCP_twist_center90_to_Atf2	chr2L_20651976_20652224	+	GTCCGTCCCCGTTAACAGCCACTTGATTTTCACCCTTTCAGCTATATGAATTGAGCAGAGCTTACTCAGAGCATCGTTAAACGAATCACGTCATCTCCGGAAGCAGAGTTCTAGTAAAAAGATAAGCACAAATAGTGAATGAGCTCATATTAAGCGGGATTCATCATACCCCTCTCCAGATTCTCAGCTACCTCGGCCGCCCGAGCAGCCACCACTTTCTCCAAGGAGCACCGATCCACGGGTATGGGC	chr2L_20651976_20652224_+_dCP_twist_center90	twist	CAGCAGCTGCG	90	Atf2	ATCACGTCATC	118	114	107	73	81	80	4.54168	4.14712	0.394563	1.53722	-2.6099	3.00446
chr3L_815611_815859_+_dCP_twist_center211_to_GATAA	chr3L_815611_815859	+	CTCGTCGGAAAAAGCACCCGCCCACACCCCGCCCCAACGGGGGAAAGAGGAAGCAGAGTGACATGTGGGTACCATTCGGGCAACCCCGATCTTCCAGAAATAGCGTGATAATCGCGGCACGCTCATCTGCCTTCTTTCTGGATCTTGATTTCCACTTCCGATTTAACTGGAAATGCATAAAAATATTCCCTTTTTTTGGGTGCCGGGAGATAAGAGTGGTTTTCCGCCCCAGCCGCCTCCCCCCTTTTA	chr3L_815611_815859_+_dCP_twist_center211	twist	CCATGTGT	211	GATAA	AGATAAGA	148	114	126	235	269	306	6.14704	3.89798	2.24906	1.32572	-2.57227	4.82132
chr3L_815611_815859_+_dCP_twist_center211_to_AP1	chr3L_815611_815859	+	CTCGTCGGAAAAAGCACCCGCCCACACCCCGCCCCAACGGGGGAAAGAGGAAGCAGAGTGACATGTGGGTACCATTCGGGCAACCCCGATCTTCCAGAAATAGCGTGATAATCGCGGCACGCTCATCTGCCTTCTTTCTGGATCTTGATTTCCACTTCCGATTTAACTGGAAATGCATAAAAATATTCCCTTTTTTTGGGTGCCGGATGAGTCACGTGGTTTTCCGCCCCAGCCGCCTCCCCCCTTTTA	chr3L_815611_815859_+_dCP_twist_center211	twist	GCCATGTGT	211	AP1	ATGAGTCAC	182	156	196	164	167	215	5.10099	3.89798	1.203	1.32572	-2.57227	3.77527
chr3L_815611_815859_+_dCP_twist_center211_to_Trl	chr3L_815611_815859	+	CTCGTCGGAAAAAGCACCCGCCCACACCCCGCCCCAACGGGGGAAAGAGGAAGCAGAGTGACATGTGGGTACCATTCGGGCAACCCCGATCTTCCAGAAATAGCGTGATAATCGCGGCACGCTCATCTGCCTTCTTTCTGGATCTTGATTTCCACTTCCGATTTAACTGGAAATGCATAAAAATATTCCCTTTTTTTGGGTGCCGGGGAGAGAGTGTGGTTTTCCGCCCCAGCCGCCTCCCCCCTTTTA	chr3L_815611_815859_+_dCP_twist_center211	twist	CCATGTG	211	Trl	GAGAGAG	605	520	553	71	66	74	2.07584	3.89798	-1.82214	1.32572	-2.57227	0.750124
chr3L_815611_815859_+_dCP_twist_center211_to_ETS	chr3L_815611_815859	+	CTCGTCGGAAAAAGCACCCGCCCACACCCCGCCCCAACGGGGGAAAGAGGAAGCAGAGTGACATGTGGGTACCATTCGGGCAACCCCGATCTTCCAGAAATAGCGTGATAATCGCGGCACGCTCATCTGCCTTCTTTCTGGATCTTGATTTCCACTTCCGATTTAACTGGAAATGCATAAAAATATTCCCTTTTTTTGGGTGCCGGACCGGAAGTGTGGTTTTCCGCCCCAGCCGCCTCCCCCCTTTTA	chr3L_815611_815859_+_dCP_twist_center211	twist	GCCATGTGT	211	ETS	ACCGGAAGT	226	183	177	145	138	143	4.61713	3.89798	0.71915	1.32572	-2.57227	3.29142
chr3L_815611_815859_+_dCP_twist_center211_to_SREBP	chr3L_815611_815859	+	CTCGTCGGAAAAAGCACCCGCCCACACCCCGCCCCAACGGGGGAAAGAGGAAGCAGAGTGACATGTGGGTACCATTCGGGCAACCCCGATCTTCCAGAAATAGCGTGATAATCGCGGCACGCTCATCTGCCTTCTTTCTGGATCTTGATTTCCACTTCCGATTTAACTGGAAATGCATAAAAATATTCCCTTTTTTTGGGTGCCGGATCACGCGACTGGTTTTCCGCCCCAGCCGCCTCCCCCCTTTTA	chr3L_815611_815859_+_dCP_twist_center211	twist	GCCATGTGTG	211	SREBP	ATCACGCGAC	281	224	223	204	239	269	5.05487	3.89798	1.15689	1.32572	-2.57227	3.72915
chr3L_815611_815859_+_dCP_twist_center211_to_Stat92E	chr3L_815611_815859	+	CTCGTCGGAAAAAGCACCCGCCCACACCCCGCCCCAACGGGGGAAAGAGGAAGCAGAGTGACATGTGGGTACCATTCGGGCAACCCCGATCTTCCAGAAATAGCGTGATAATCGCGGCACGCTCATCTGCCTTCTTTCTGGATCTTGATTTCCACTTCCGATTTAACTGGAAATGCATAAAAATATTCCCTTTTTTTGGGTGCCGTTTCCCGGAAATGGTTTTCCGCCCCAGCCGCCTCCCCCCTTTTA	chr3L_815611_815859_+_dCP_twist_center211	twist	GGCCATGTGTG	211	Stat92E	TTTCCCGGAAA	499	428	457	149	102	162	3.30664	3.89798	-0.591347	1.32572	-2.57227	1.98092
chr3L_815611_815859_+_dCP_twist_center211_to_Atf2	chr3L_815611_815859	+	CTCGTCGGAAAAAGCACCCGCCCACACCCCGCCCCAACGGGGGAAAGAGGAAGCAGAGTGACATGTGGGTACCATTCGGGCAACCCCGATCTTCCAGAAATAGCGTGATAATCGCGGCACGCTCATCTGCCTTCTTTCTGGATCTTGATTTCCACTTCCGATTTAACTGGAAATGCATAAAAATATTCCCTTTTTTTGGGTGCCGATCACGTCATCTGGTTTTCCGCCCCAGCCGCCTCCCCCCTTTTA	chr3L_815611_815859_+_dCP_twist_center211	twist	GGCCATGTGTG	211	Atf2	ATCACGTCATC	210	202	177	174	243	264	5.30069	3.89798	1.40271	1.32572	-2.57227	3.97497
chr2R_1623457_1623705_+_dCP_twist_center130_to_GATAA	chr2R_1623457_1623705	+	CGGCCAGACTAGACCGTCGTATTATTGTGATTTACTTGAGCCGCTTTATCGCCGTAATCACAACAAAGTTGTGCGACAAATACAGATATGGGGACAAACAATAAGAGCGAGAGTTGCGGATGGCAGAGATAAGATTGGCTCCCAACCAACTAGAAAGTGACTAATCGGAGCTTGATGTCATTCCGGGACTCTGACCGGAAGACGACGGTACGCCGGGGCATTCGTTTAGGTCAACTAATTGCGACGTGT	chr2R_1623457_1623705_+_dCP_twist_center130	twist	GCAGCTGC	130	GATAA	AGATAAGA	58	41	55	6	2	2	1.11194	3.8125	-2.70056	1.24745	-2.56505	-0.13551
chr2R_1623457_1623705_+_dCP_twist_center130_to_AP1	chr2R_1623457_1623705	+	CGGCCAGACTAGACCGTCGTATTATTGTGATTTACTTGAGCCGCTTTATCGCCGTAATCACAACAAAGTTGTGCGACAAATACAGATATGGGGACAAACAATAAGAGCGAGAGTTGCGGATGGCAATGAGTCACTTGGCTCCCAACCAACTAGAAAGTGACTAATCGGAGCTTGATGTCATTCCGGGACTCTGACCGGAAGACGACGGTACGCCGGGGCATTCGTTTAGGTCAACTAATTGCGACGTGT	chr2R_1623457_1623705_+_dCP_twist_center130	twist	GGCAGCTGC	130	AP1	ATGAGTCAC	113	104	106	82	68	85	4.60203	3.8125	0.78953	1.24745	-2.56505	3.35458
chr2R_1623457_1623705_+_dCP_twist_center130_to_Trl	chr2R_1623457_1623705	+	CGGCCAGACTAGACCGTCGTATTATTGTGATTTACTTGAGCCGCTTTATCGCCGTAATCACAACAAAGTTGTGCGACAAATACAGATATGGGGACAAACAATAAGAGCGAGAGTTGCGGATGGCAGGAGAGAGCTTGGCTCCCAACCAACTAGAAAGTGACTAATCGGAGCTTGATGTCATTCCGGGACTCTGACCGGAAGACGACGGTACGCCGGGGCATTCGTTTAGGTCAACTAATTGCGACGTGT	chr2R_1623457_1623705_+_dCP_twist_center130	twist	GCAGCTG	130	Trl	GAGAGAG	66	76	76	10	5	4	1.52791	3.8125	-2.28459	1.24745	-2.56505	0.280462
chr2R_1623457_1623705_+_dCP_twist_center130_to_ETS	chr2R_1623457_1623705	+	CGGCCAGACTAGACCGTCGTATTATTGTGATTTACTTGAGCCGCTTTATCGCCGTAATCACAACAAAGTTGTGCGACAAATACAGATATGGGGACAAACAATAAGAGCGAGAGTTGCGGATGGCAACCGGAAGTTTGGCTCCCAACCAACTAGAAAGTGACTAATCGGAGCTTGATGTCATTCCGGGACTCTGACCGGAAGACGACGGTACGCCGGGGCATTCGTTTAGGTCAACTAATTGCGACGTGT	chr2R_1623457_1623705_+_dCP_twist_center130	twist	GGCAGCTGC	130	ETS	ACCGGAAGT	103	70	81	29	35	33	3.69337	3.8125	-0.119128	1.24745	-2.56505	2.44592
chr2R_1623457_1623705_+_dCP_twist_center130_to_SREBP	chr2R_1623457_1623705	+	CGGCCAGACTAGACCGTCGTATTATTGTGATTTACTTGAGCCGCTTTATCGCCGTAATCACAACAAAGTTGTGCGACAAATACAGATATGGGGACAAACAATAAGAGCGAGAGTTGCGGATGGCAATCACGCGACTGGCTCCCAACCAACTAGAAAGTGACTAATCGGAGCTTGATGTCATTCCGGGACTCTGACCGGAAGACGACGGTACGCCGGGGCATTCGTTTAGGTCAACTAATTGCGACGTGT	chr2R_1623457_1623705_+_dCP_twist_center130	twist	GGCAGCTGCT	130	SREBP	ATCACGCGAC	154	117	132	178	210	251	5.74935	3.8125	1.93685	1.24745	-2.56505	4.5019
chr2R_1623457_1623705_+_dCP_twist_center130_to_Stat92E	chr2R_1623457_1623705	+	CGGCCAGACTAGACCGTCGTATTATTGTGATTTACTTGAGCCGCTTTATCGCCGTAATCACAACAAAGTTGTGCGACAAATACAGATATGGGGACAAACAATAAGAGCGAGAGTTGCGGATGGCTTTCCCGGAAATGGCTCCCAACCAACTAGAAAGTGACTAATCGGAGCTTGATGTCATTCCGGGACTCTGACCGGAAGACGACGGTACGCCGGGGCATTCGTTTAGGTCAACTAATTGCGACGTGT	chr2R_1623457_1623705_+_dCP_twist_center130	twist	AGGCAGCTGCT	130	Stat92E	TTTCCCGGAAA	154	144	109	17	25	24	2.45487	3.8125	-1.35763	1.24745	-2.56505	1.20742
chr2R_1623457_1623705_+_dCP_twist_center130_to_Atf2	chr2R_1623457_1623705	+	CGGCCAGACTAGACCGTCGTATTATTGTGATTTACTTGAGCCGCTTTATCGCCGTAATCACAACAAAGTTGTGCGACAAATACAGATATGGGGACAAACAATAAGAGCGAGAGTTGCGGATGGCATCACGTCATCTGGCTCCCAACCAACTAGAAAGTGACTAATCGGAGCTTGATGTCATTCCGGGACTCTGACCGGAAGACGACGGTACGCCGGGGCATTCGTTTAGGTCAACTAATTGCGACGTGT	chr2R_1623457_1623705_+_dCP_twist_center130	twist	AGGCAGCTGCT	130	Atf2	ATCACGTCATC	112	109	117	84	89	88	4.70053	3.8125	0.888027	1.24745	-2.56505	3.45308
chr3R_10570457_10570705_+_dCP_twist_center166_to_GATAA	chr3R_10570457_10570705	+	TCCGTCCTCCTTGTCGGGTGTTGTTTACATTTTCAAATTTAAATCAATTTTGTTTCTGATTGCGGTTTAAGTGGCAGGTTCCAGTCCCCCAGACCCCAGAGCCCAAGTACCCAGTTTTCAGTTTTCAGCCCCATCTCTTGTCTTTCTTTATGTTTATTGCTGAGATAAGAGTTCGGTATCTGGATCTGTATCAGTCTGTGTGGCATTCTCGTGTTGTCAAACAATGCGCATATGGATACTGTATCTGTA	chr3R_10570457_10570705_+_dCP_twist_center166	twist	CCATATGT	166	GATAA	AGATAAGA	332	301	344	76	54	74	2.7933	4.26339	-1.47009	1.35961	-2.90378	1.43369
chr3R_10570457_10570705_+_dCP_twist_center166_to_AP1	chr3R_10570457_10570705	+	TCCGTCCTCCTTGTCGGGTGTTGTTTACATTTTCAAATTTAAATCAATTTTGTTTCTGATTGCGGTTTAAGTGGCAGGTTCCAGTCCCCCAGACCCCAGAGCCCAAGTACCCAGTTTTCAGTTTTCAGCCCCATCTCTTGTCTTTCTTTATGTTTATTGCTATGAGTCACGTTCGGTATCTGGATCTGTATCAGTCTGTGTGGCATTCTCGTGTTGTCAAACAATGCGCATATGGATACTGTATCTGTA	chr3R_10570457_10570705_+_dCP_twist_center166	twist	GCCATATGT	166	AP1	ATGAGTCAC	226	192	193	329	227	281	5.51152	4.26339	1.24812	1.35961	-2.90378	4.1519
chr3R_10570457_10570705_+_dCP_twist_center166_to_Trl	chr3R_10570457_10570705	+	TCCGTCCTCCTTGTCGGGTGTTGTTTACATTTTCAAATTTAAATCAATTTTGTTTCTGATTGCGGTTTAAGTGGCAGGTTCCAGTCCCCCAGACCCCAGAGCCCAAGTACCCAGTTTTCAGTTTTCAGCCCCATCTCTTGTCTTTCTTTATGTTTATTGCTGGAGAGAGTGTTCGGTATCTGGATCTGTATCAGTCTGTGTGGCATTCTCGTGTTGTCAAACAATGCGCATATGGATACTGTATCTGTA	chr3R_10570457_10570705_+_dCP_twist_center166	twist	CCATATG	166	Trl	GAGAGAG	265	240	218	28	21	41	2.04777	4.26339	-2.21562	1.35961	-2.90378	0.688158
chr3R_10570457_10570705_+_dCP_twist_center166_to_ETS	chr3R_10570457_10570705	+	TCCGTCCTCCTTGTCGGGTGTTGTTTACATTTTCAAATTTAAATCAATTTTGTTTCTGATTGCGGTTTAAGTGGCAGGTTCCAGTCCCCCAGACCCCAGAGCCCAAGTACCCAGTTTTCAGTTTTCAGCCCCATCTCTTGTCTTTCTTTATGTTTATTGCTACCGGAAGTGTTCGGTATCTGGATCTGTATCAGTCTGTGTGGCATTCTCGTGTTGTCAAACAATGCGCATATGGATACTGTATCTGTA	chr3R_10570457_10570705_+_dCP_twist_center166	twist	GCCATATGT	166	ETS	ACCGGAAGT	196	161	179	516	351	436	6.33773	4.26339	2.07434	1.35961	-2.90378	4.97812
chr3R_10570457_10570705_+_dCP_twist_center166_to_SREBP	chr3R_10570457_10570705	+	TCCGTCCTCCTTGTCGGGTGTTGTTTACATTTTCAAATTTAAATCAATTTTGTTTCTGATTGCGGTTTAAGTGGCAGGTTCCAGTCCCCCAGACCCCAGAGCCCAAGTACCCAGTTTTCAGTTTTCAGCCCCATCTCTTGTCTTTCTTTATGTTTATTGCTATCACGCGACTTCGGTATCTGGATCTGTATCAGTCTGTGTGGCATTCTCGTGTTGTCAAACAATGCGCATATGGATACTGTATCTGTA	chr3R_10570457_10570705_+_dCP_twist_center166	twist	GCCATATGTG	166	SREBP	ATCACGCGAC	422	379	375	225	163	200	4.05806	4.26339	-0.205335	1.35961	-2.90378	2.69844
chr3R_10570457_10570705_+_dCP_twist_center166_to_Stat92E	chr3R_10570457_10570705	+	TCCGTCCTCCTTGTCGGGTGTTGTTTACATTTTCAAATTTAAATCAATTTTGTTTCTGATTGCGGTTTAAGTGGCAGGTTCCAGTCCCCCAGACCCCAGAGCCCAAGTACCCAGTTTTCAGTTTTCAGCCCCATCTCTTGTCTTTCTTTATGTTTATTGCTTTCCCGGAAATTCGGTATCTGGATCTGTATCAGTCTGTGTGGCATTCTCGTGTTGTCAAACAATGCGCATATGGATACTGTATCTGTA	chr3R_10570457_10570705_+_dCP_twist_center166	twist	TGCCATATGTG	166	Stat92E	TTTCCCGGAAA	146	151	141	276	164	195	5.58153	4.26339	1.31814	1.35961	-2.90378	4.22192
chr3R_10570457_10570705_+_dCP_twist_center166_to_Atf2	chr3R_10570457_10570705	+	TCCGTCCTCCTTGTCGGGTGTTGTTTACATTTTCAAATTTAAATCAATTTTGTTTCTGATTGCGGTTTAAGTGGCAGGTTCCAGTCCCCCAGACCCCAGAGCCCAAGTACCCAGTTTTCAGTTTTCAGCCCCATCTCTTGTCTTTCTTTATGTTTATTGCATCACGTCATCTTCGGTATCTGGATCTGTATCAGTCTGTGTGGCATTCTCGTGTTGTCAAACAATGCGCATATGGATACTGTATCTGTA	chr3R_10570457_10570705_+_dCP_twist_center166	twist	TGCCATATGTG	166	Atf2	ATCACGTCATC	133	123	130	69	35	48	3.69968	4.26339	-0.563713	1.35961	-2.90378	2.34006
chrX_5630019_5630267_+_dCP_twist_center147_to_GATAA	chrX_5630019_5630267	-	ATATTATTAAAACAAAATAAGTGTGTACGATTAGATAATGGCGCGATTTCTGCAAACTTAGTATTTCATTTTGGTTATGAAATGATATTGGGGCTTATCGTTTTCTCGGAATTCCTGTTCAAATAACACTGAAATAAGGAACTAGATAAGAATGATGATGGAGAAATATGAGTCAGTGGAACGTGTTGATAAGGAAACCGCATTTATCAATTACTTTTTCGCTTGATGAATGAAAATGTTTTCGTTACG	chrX_5630019_5630267_+_dCP_twist_center147	twist	ACATATGT	147	GATAA	AGATAAGA	36	37	31	90	81	88	6.38366	6.76008	-0.376425	3.88543	-2.87465	2.49823
chrX_5630019_5630267_+_dCP_twist_center147_to_AP1	chrX_5630019_5630267	-	ATATTATTAAAACAAAATAAGTGTGTACGATTAGATAATGGCGCGATTTCTGCAAACTTAGTATTTCATTTTGGTTATGAAATGATATTGGGGCTTATCGTTTTCTCGGAATTCCTGTTCAAATAACACTGAAATAAGGAACATGAGTCACATGATGATGGAGAAATATGAGTCAGTGGAACGTGTTGATAAGGAAACCGCATTTATCAATTACTTTTTCGCTTGATGAATGAAAATGTTTTCGTTACG	chrX_5630019_5630267_+_dCP_twist_center147	twist	TACATATGT	147	AP1	ATGAGTCAC	34	34	32	171	157	202	7.47126	6.76008	0.711177	3.88543	-2.87465	3.58583
chrX_5630019_5630267_+_dCP_twist_center147_to_Trl	chrX_5630019_5630267	-	ATATTATTAAAACAAAATAAGTGTGTACGATTAGATAATGGCGCGATTTCTGCAAACTTAGTATTTCATTTTGGTTATGAAATGATATTGGGGCTTATCGTTTTCTCGGAATTCCTGTTCAAATAACACTGAAATAAGGAACTGAGAGAGTATGATGATGGAGAAATATGAGTCAGTGGAACGTGTTGATAAGGAAACCGCATTTATCAATTACTTTTTCGCTTGATGAATGAAAATGTTTTCGTTACG	chrX_5630019_5630267_+_dCP_twist_center147	twist	ACATATG	147	Trl	GAGAGAG	36	23	20	62	61	92	6.51702	6.76008	-0.243062	3.88543	-2.87465	2.63159
chrX_5630019_5630267_+_dCP_twist_center147_to_ETS	chrX_5630019_5630267	-	ATATTATTAAAACAAAATAAGTGTGTACGATTAGATAATGGCGCGATTTCTGCAAACTTAGTATTTCATTTTGGTTATGAAATGATATTGGGGCTTATCGTTTTCTCGGAATTCCTGTTCAAATAACACTGAAATAAGGAACACCGGAAGTATGATGATGGAGAAATATGAGTCAGTGGAACGTGTTGATAAGGAAACCGCATTTATCAATTACTTTTTCGCTTGATGAATGAAAATGTTTTCGTTACG	chrX_5630019_5630267_+_dCP_twist_center147	twist	TACATATGT	147	ETS	ACCGGAAGT	61	52	41	273	317	391	7.75531	6.76008	0.995234	3.88543	-2.87465	3.86989
chrX_5630019_5630267_+_dCP_twist_center147_to_SREBP	chrX_5630019_5630267	-	ATATTATTAAAACAAAATAAGTGTGTACGATTAGATAATGGCGCGATTTCTGCAAACTTAGTATTTCATTTTGGTTATGAAATGATATTGGGGCTTATCGTTTTCTCGGAATTCCTGTTCAAATAACACTGAAATAAGGAACATCACGCGACTGATGATGGAGAAATATGAGTCAGTGGAACGTGTTGATAAGGAAACCGCATTTATCAATTACTTTTTCGCTTGATGAATGAAAATGTTTTCGTTACG	chrX_5630019_5630267_+_dCP_twist_center147	twist	TACATATGTA	147	SREBP	ATCACGCGAC	45	33	33	304	402	452	8.47849	6.76008	1.71841	3.88543	-2.87465	4.59307
chrX_5630019_5630267_+_dCP_twist_center147_to_Stat92E	chrX_5630019_5630267	-	ATATTATTAAAACAAAATAAGTGTGTACGATTAGATAATGGCGCGATTTCTGCAAACTTAGTATTTCATTTTGGTTATGAAATGATATTGGGGCTTATCGTTTTCTCGGAATTCCTGTTCAAATAACACTGAAATAAGGAATTTCCCGGAAATGATGATGGAGAAATATGAGTCAGTGGAACGTGTTGATAAGGAAACCGCATTTATCAATTACTTTTTCGCTTGATGAATGAAAATGTTTTCGTTACG	chrX_5630019_5630267_+_dCP_twist_center147	twist	CTACATATGTA	147	Stat92E	TTTCCCGGAAA	30	22	25	55	80	71	6.51791	6.76008	-0.24217	3.88543	-2.87465	2.63249
chrX_5630019_5630267_+_dCP_twist_center147_to_Atf2	chrX_5630019_5630267	-	ATATTATTAAAACAAAATAAGTGTGTACGATTAGATAATGGCGCGATTTCTGCAAACTTAGTATTTCATTTTGGTTATGAAATGATATTGGGGCTTATCGTTTTCTCGGAATTCCTGTTCAAATAACACTGAAATAAGGAAATCACGTCATCTGATGATGGAGAAATATGAGTCAGTGGAACGTGTTGATAAGGAAACCGCATTTATCAATTACTTTTTCGCTTGATGAATGAAAATGTTTTCGTTACG	chrX_5630019_5630267_+_dCP_twist_center147	twist	CTACATATGTA	147	Atf2	ATCACGTCATC	93	63	77	304	406	460	7.42455	6.76008	0.664468	3.88543	-2.87465	3.53912
chr3R_18987920_18988168_+_dCP_twist_center133_to_GATAA	chr3R_18987920_18988168	+	AGAGCAGACTTCCTGGCTAAAAATAAAGCAATAGAATGGGAATTTTATGAATACGCTTATCCAATATTTTTCAACTGTTATGTCTGTGAATCATGCAAATTTTAGACCAGCCTCTGTTATCACTCAAAAAGATAAGATCTATAAATAATTTCGAGCGATAAAGAGACGGCATATTTGTGTTTTGGTTATTCGATCAGTTTGGCCTTTGATGCCGTTGCCAAGGGCTAACGCGGCATCCGAAAATAGCCA	chr3R_18987920_18988168_+_dCP_twist_center133	twist	GCAGCTGC	133	GATAA	AGATAAGA	88	78	92	9	5	10	1.62567	3.68033	-2.05466	1.08481	-2.59551	0.540854
chr3R_18987920_18988168_+_dCP_twist_center133_to_AP1	chr3R_18987920_18988168	+	AGAGCAGACTTCCTGGCTAAAAATAAAGCAATAGAATGGGAATTTTATGAATACGCTTATCCAATATTTTTCAACTGTTATGTCTGTGAATCATGCAAATTTTAGACCAGCCTCTGTTATCACTCAAAATGAGTCACTCTATAAATAATTTCGAGCGATAAAGAGACGGCATATTTGTGTTTTGGTTATTCGATCAGTTTGGCCTTTGATGCCGTTGCCAAGGGCTAACGCGGCATCCGAAAATAGCCA	chr3R_18987920_18988168_+_dCP_twist_center133	twist	AGCAGCTGC	133	AP1	ATGAGTCAC	77	62	81	28	23	63	4.09444	3.68033	0.414113	1.08481	-2.59551	3.00963
chr3R_18987920_18988168_+_dCP_twist_center133_to_Trl	chr3R_18987920_18988168	+	AGAGCAGACTTCCTGGCTAAAAATAAAGCAATAGAATGGGAATTTTATGAATACGCTTATCCAATATTTTTCAACTGTTATGTCTGTGAATCATGCAAATTTTAGACCAGCCTCTGTTATCACTCAAAAGAGAGAGCTCTATAAATAATTTCGAGCGATAAAGAGACGGCATATTTGTGTTTTGGTTATTCGATCAGTTTGGCCTTTGATGCCGTTGCCAAGGGCTAACGCGGCATCCGAAAATAGCCA	chr3R_18987920_18988168_+_dCP_twist_center133	twist	GCAGCTG	133	Trl	GAGAGAG	113	95	95	7	6	10	1.34017	3.68033	-2.34015	1.08481	-2.59551	0.255362
chr3R_18987920_18988168_+_dCP_twist_center133_to_ETS	chr3R_18987920_18988168	+	AGAGCAGACTTCCTGGCTAAAAATAAAGCAATAGAATGGGAATTTTATGAATACGCTTATCCAATATTTTTCAACTGTTATGTCTGTGAATCATGCAAATTTTAGACCAGCCTCTGTTATCACTCAAAACCGGAAGTTCTATAAATAATTTCGAGCGATAAAGAGACGGCATATTTGTGTTTTGGTTATTCGATCAGTTTGGCCTTTGATGCCGTTGCCAAGGGCTAACGCGGCATCCGAAAATAGCCA	chr3R_18987920_18988168_+_dCP_twist_center133	twist	AGCAGCTGC	133	ETS	ACCGGAAGT	61	66	52	61	55	59	5.03234	3.68033	1.35202	1.08481	-2.59551	3.94753
chr3R_18987920_18988168_+_dCP_twist_center133_to_SREBP	chr3R_18987920_18988168	+	AGAGCAGACTTCCTGGCTAAAAATAAAGCAATAGAATGGGAATTTTATGAATACGCTTATCCAATATTTTTCAACTGTTATGTCTGTGAATCATGCAAATTTTAGACCAGCCTCTGTTATCACTCAAAATCACGCGACCTATAAATAATTTCGAGCGATAAAGAGACGGCATATTTGTGTTTTGGTTATTCGATCAGTTTGGCCTTTGATGCCGTTGCCAAGGGCTAACGCGGCATCCGAAAATAGCCA	chr3R_18987920_18988168_+_dCP_twist_center133	twist	AGCAGCTGCT	133	SREBP	ATCACGCGAC	40	33	45	4	3	3	1.49671	3.68033	-2.18362	1.08481	-2.59551	0.411894
chr3R_18987920_18988168_+_dCP_twist_center133_to_Stat92E	chr3R_18987920_18988168	+	AGAGCAGACTTCCTGGCTAAAAATAAAGCAATAGAATGGGAATTTTATGAATACGCTTATCCAATATTTTTCAACTGTTATGTCTGTGAATCATGCAAATTTTAGACCAGCCTCTGTTATCACTCAATTTCCCGGAAACTATAAATAATTTCGAGCGATAAAGAGACGGCATATTTGTGTTTTGGTTATTCGATCAGTTTGGCCTTTGATGCCGTTGCCAAGGGCTAACGCGGCATCCGAAAATAGCCA	chr3R_18987920_18988168_+_dCP_twist_center133	twist	AAGCAGCTGCT	133	Stat92E	TTTCCCGGAAA	57	48	44	31	23	28	4.19945	3.68033	0.519125	1.08481	-2.59551	3.11464
chr3R_18987920_18988168_+_dCP_twist_center133_to_Atf2	chr3R_18987920_18988168	+	AGAGCAGACTTCCTGGCTAAAAATAAAGCAATAGAATGGGAATTTTATGAATACGCTTATCCAATATTTTTCAACTGTTATGTCTGTGAATCATGCAAATTTTAGACCAGCCTCTGTTATCACTCAAATCACGTCATCCTATAAATAATTTCGAGCGATAAAGAGACGGCATATTTGTGTTTTGGTTATTCGATCAGTTTGGCCTTTGATGCCGTTGCCAAGGGCTAACGCGGCATCCGAAAATAGCCA	chr3R_18987920_18988168_+_dCP_twist_center133	twist	AAGCAGCTGCT	133	Atf2	ATCACGTCATC	110	78	73	10	15	13	2.30114	3.68033	-1.37919	1.08481	-2.59551	1.21633
chrX_386951_387199_+_dCP_twist_center66_to_GATAA	chrX_386951_387199	-	CCACCCACTCTAGTGATTGGAATGGCCCACGGGTGTGAGCGGCGAACGGGCAGTTGAAAACAAGATAAGATACGCAATACGTCGCTGCGAAGCGGAAGAAGTAGAACTAGAACCAGAATATTAAGCAGATAAAGCGCACAAGGCGAATTCGCGGGGAATTTAGCGGTACAATGTTTGAGTTGACGTTAAATCCAATAAAACGCGATAAGCGGTACCTTTCCACGACAGGCGCGCCATGAAAATCTCGAA	chrX_386951_387199_+_dCP_twist_center66	twist	ACACATGT	66	GATAA	AGATAAGA	155	133	132	121	75	122	4.64771	5.68021	-1.0325	2.7227	-2.95751	1.92501
chrX_386951_387199_+_dCP_twist_center66_to_AP1	chrX_386951_387199	-	CCACCCACTCTAGTGATTGGAATGGCCCACGGGTGTGAGCGGCGAACGGGCAGTTGAAAACATGAGTCACTACGCAATACGTCGCTGCGAAGCGGAAGAAGTAGAACTAGAACCAGAATATTAAGCAGATAAAGCGCACAAGGCGAATTCGCGGGGAATTTAGCGGTACAATGTTTGAGTTGACGTTAAATCCAATAAAACGCGATAAGCGGTACCTTTCCACGACAGGCGCGCCATGAAAATCTCGAA	chrX_386951_387199_+_dCP_twist_center66	twist	AACACATGT	66	AP1	ATGAGTCAC	49	39	47	53	51	38	5.15096	5.68021	-0.529252	2.7227	-2.95751	2.42826
chrX_386951_387199_+_dCP_twist_center66_to_Trl	chrX_386951_387199	-	CCACCCACTCTAGTGATTGGAATGGCCCACGGGTGTGAGCGGCGAACGGGCAGTTGAAAACAGAGAGAGTTACGCAATACGTCGCTGCGAAGCGGAAGAAGTAGAACTAGAACCAGAATATTAAGCAGATAAAGCGCACAAGGCGAATTCGCGGGGAATTTAGCGGTACAATGTTTGAGTTGACGTTAAATCCAATAAAACGCGATAAGCGGTACCTTTCCACGACAGGCGCGCCATGAAAATCTCGAA	chrX_386951_387199_+_dCP_twist_center66	twist	ACACATG	66	Trl	GAGAGAG	19	20	15	3	8	12	3.83586	5.68021	-1.84435	2.7227	-2.95751	1.11316
chrX_386951_387199_+_dCP_twist_center66_to_ETS	chrX_386951_387199	-	CCACCCACTCTAGTGATTGGAATGGCCCACGGGTGTGAGCGGCGAACGGGCAGTTGAAAACACCGGAAGTTACGCAATACGTCGCTGCGAAGCGGAAGAAGTAGAACTAGAACCAGAATATTAAGCAGATAAAGCGCACAAGGCGAATTCGCGGGGAATTTAGCGGTACAATGTTTGAGTTGACGTTAAATCCAATAAAACGCGATAAGCGGTACCTTTCCACGACAGGCGCGCCATGAAAATCTCGAA	chrX_386951_387199_+_dCP_twist_center66	twist	AACACATGT	66	ETS	ACCGGAAGT	36	32	32	14	28	23	4.4692	5.68021	-1.21101	2.7227	-2.95751	1.7465
chrX_386951_387199_+_dCP_twist_center66_to_SREBP	chrX_386951_387199	-	CCACCCACTCTAGTGATTGGAATGGCCCACGGGTGTGAGCGGCGAACGGGCAGTTGAAAACATCACGCGACACGCAATACGTCGCTGCGAAGCGGAAGAAGTAGAACTAGAACCAGAATATTAAGCAGATAAAGCGCACAAGGCGAATTCGCGGGGAATTTAGCGGTACAATGTTTGAGTTGACGTTAAATCCAATAAAACGCGATAAGCGGTACCTTTCCACGACAGGCGCGCCATGAAAATCTCGAA	chrX_386951_387199_+_dCP_twist_center66	twist	AACACATGTT	66	SREBP	ATCACGCGAC	37	30	32	114	116	161	7.0514	5.68021	1.3712	2.7227	-2.95751	4.3287
chrX_386951_387199_+_dCP_twist_center66_to_Stat92E	chrX_386951_387199	-	CCACCCACTCTAGTGATTGGAATGGCCCACGGGTGTGAGCGGCGAACGGGCAGTTGAAAATTTCCCGGAAAACGCAATACGTCGCTGCGAAGCGGAAGAAGTAGAACTAGAACCAGAATATTAAGCAGATAAAGCGCACAAGGCGAATTCGCGGGGAATTTAGCGGTACAATGTTTGAGTTGACGTTAAATCCAATAAAACGCGATAAGCGGTACCTTTCCACGACAGGCGCGCCATGAAAATCTCGAA	chrX_386951_387199_+_dCP_twist_center66	twist	CAACACATGTT	66	Stat92E	TTTCCCGGAAA	37	44	39	4	4	6	1.95408	5.68021	-3.72612	2.7227	-2.95751	-0.768617
chrX_386951_387199_+_dCP_twist_center66_to_Atf2	chrX_386951_387199	-	CCACCCACTCTAGTGATTGGAATGGCCCACGGGTGTGAGCGGCGAACGGGCAGTTGAAAAATCACGTCATCACGCAATACGTCGCTGCGAAGCGGAAGAAGTAGAACTAGAACCAGAATATTAAGCAGATAAAGCGCACAAGGCGAATTCGCGGGGAATTTAGCGGTACAATGTTTGAGTTGACGTTAAATCCAATAAAACGCGATAAGCGGTACCTTTCCACGACAGGCGCGCCATGAAAATCTCGAA	chrX_386951_387199_+_dCP_twist_center66	twist	CAACACATGTT	66	Atf2	ATCACGTCATC	51	58	54	54	56	69	5.19906	5.68021	-0.481152	2.7227	-2.95751	2.47636
chr3R_8543729_8543977_+_dCP_twist_center224_to_GATAA	chr3R_8543729_8543977	-	AGAAGCTCCACTGAGAATAATGGAGGGCCATCCAGAATGGTGTTTCCCCATGACAACCAAGTGGATTTTTTTCCCGCTTACGTCACGGCACAATCGGACGAAAAGACTTAAAAATAATAATTTAACAATTTAGCGAGAAATTATCTTGGGTTTCCTTATCGAGTAGGGGCTGGCACTTGTTTACTACAGATTGTTATTATGTACTTCTTACACGCTGCCAAGATAAGACTCTTGTTTATCTCAACCTCC	chr3R_8543729_8543977_+_dCP_twist_center224	twist	ACAAGTGA	224	GATAA	AGATAAGA	104	75	81	66	35	48	4.2498	5.96011	-1.71031	3.53751	-2.4226	0.71229
chr3R_8543729_8543977_+_dCP_twist_center224_to_AP1	chr3R_8543729_8543977	-	AGAAGCTCCACTGAGAATAATGGAGGGCCATCCAGAATGGTGTTTCCCCATGACAACCAAGTGGATTTTTTTCCCGCTTACGTCACGGCACAATCGGACGAAAAGACTTAAAAATAATAATTTAACAATTTAGCGAGAAATTATCTTGGGTTTCCTTATCGAGTAGGGGCTGGCACTTGTTTACTACAGATTGTTATTATGTACTTCTTACACGCTGCCATGAGTCACCTCTTGTTTATCTCAACCTCC	chr3R_8543729_8543977_+_dCP_twist_center224	twist	AACAAGTGA	224	AP1	ATGAGTCAC	137	126	147	563	581	669	7.21918	5.96011	1.25907	3.53751	-2.4226	3.68167
chr3R_8543729_8543977_+_dCP_twist_center224_to_Trl	chr3R_8543729_8543977	-	AGAAGCTCCACTGAGAATAATGGAGGGCCATCCAGAATGGTGTTTCCCCATGACAACCAAGTGGATTTTTTTCCCGCTTACGTCACGGCACAATCGGACGAAAAGACTTAAAAATAATAATTTAACAATTTAGCGAGAAATTATCTTGGGTTTCCTTATCGAGTAGGGGCTGGCACTTGTTTACTACAGATTGTTATTATGTACTTCTTACACGCTGCCAGAGAGAGACTCTTGTTTATCTCAACCTCC	chr3R_8543729_8543977_+_dCP_twist_center224	twist	ACAAGTG	224	Trl	GAGAGAG	65	41	53	98	68	90	5.74821	5.96011	-0.211895	3.53751	-2.4226	2.2107
chr3R_8543729_8543977_+_dCP_twist_center224_to_ETS	chr3R_8543729_8543977	-	AGAAGCTCCACTGAGAATAATGGAGGGCCATCCAGAATGGTGTTTCCCCATGACAACCAAGTGGATTTTTTTCCCGCTTACGTCACGGCACAATCGGACGAAAAGACTTAAAAATAATAATTTAACAATTTAGCGAGAAATTATCTTGGGTTTCCTTATCGAGTAGGGGCTGGCACTTGTTTACTACAGATTGTTATTATGTACTTCTTACACGCTGCCACCGGAAGTCTCTTGTTTATCTCAACCTCC	chr3R_8543729_8543977_+_dCP_twist_center224	twist	AACAAGTGA	224	ETS	ACCGGAAGT	53	54	46	538	510	555	8.46307	5.96011	2.50297	3.53751	-2.4226	4.92556
chr3R_8543729_8543977_+_dCP_twist_center224_to_SREBP	chr3R_8543729_8543977	-	AGAAGCTCCACTGAGAATAATGGAGGGCCATCCAGAATGGTGTTTCCCCATGACAACCAAGTGGATTTTTTTCCCGCTTACGTCACGGCACAATCGGACGAAAAGACTTAAAAATAATAATTTAACAATTTAGCGAGAAATTATCTTGGGTTTCCTTATCGAGTAGGGGCTGGCACTTGTTTACTACAGATTGTTATTATGTACTTCTTACACGCTGCCATCACGCGACTCTTGTTTATCTCAACCTCC	chr3R_8543729_8543977_+_dCP_twist_center224	twist	AACAAGTGAC	224	SREBP	ATCACGCGAC	106	81	69	692	659	855	8.18386	5.96011	2.22376	3.53751	-2.4226	4.64635
chr3R_8543729_8543977_+_dCP_twist_center224_to_Stat92E	chr3R_8543729_8543977	-	AGAAGCTCCACTGAGAATAATGGAGGGCCATCCAGAATGGTGTTTCCCCATGACAACCAAGTGGATTTTTTTCCCGCTTACGTCACGGCACAATCGGACGAAAAGACTTAAAAATAATAATTTAACAATTTAGCGAGAAATTATCTTGGGTTTCCTTATCGAGTAGGGGCTGGCACTTGTTTACTACAGATTGTTATTATGTACTTCTTACACGCTGCTTTCCCGGAAATCTTGTTTATCTCAACCTCC	chr3R_8543729_8543977_+_dCP_twist_center224	twist	CAACAAGTGAC	224	Stat92E	TTTCCCGGAAA	160	116	101	268	285	303	6.27352	5.96011	0.313419	3.53751	-2.4226	2.73602
chr3R_8543729_8543977_+_dCP_twist_center224_to_Atf2	chr3R_8543729_8543977	-	AGAAGCTCCACTGAGAATAATGGAGGGCCATCCAGAATGGTGTTTCCCCATGACAACCAAGTGGATTTTTTTCCCGCTTACGTCACGGCACAATCGGACGAAAAGACTTAAAAATAATAATTTAACAATTTAGCGAGAAATTATCTTGGGTTTCCTTATCGAGTAGGGGCTGGCACTTGTTTACTACAGATTGTTATTATGTACTTCTTACACGCTGCATCACGTCATCTCTTGTTTATCTCAACCTCC	chr3R_8543729_8543977_+_dCP_twist_center224	twist	CAACAAGTGAC	224	Atf2	ATCACGTCATC	194	176	174	765	759	911	7.23625	5.96011	1.27615	3.53751	-2.4226	3.69874
chrX_8510602_8510850_+_dCP_twist_center67_to_GATAA	chrX_8510602_8510850	-	GGCCACCAACAATGACATGTGTGATGGGCGGTGTGGGTATATTCATATATTCATTCATGCATCAGATAAGATCTTTGTCAATTAAGCAATCAGCAGGAAGTTTGCTGCGCACTTTGCCTTATCATCGTTCGCTCTCTTTCTAGCCGCGTGTCGCCGTCTCTTTCATGTGGAACTCGCTTCATTGCATCAGAAAAATCACATCATCAAAAGCCTGCGTCTTTTTTTTAACCGATACCCTCGATCGGGATA	chrX_8510602_8510850_+_dCP_twist_center67	twist	CCATATGC	67	GATAA	AGATAAGA	345	286	276	227	392	425	5.30935	6.10108	-0.79173	2.95112	-3.14995	2.35823
chrX_8510602_8510850_+_dCP_twist_center67_to_AP1	chrX_8510602_8510850	-	GGCCACCAACAATGACATGTGTGATGGGCGGTGTGGGTATATTCATATATTCATTCATGCATATGAGTCACTCTTTGTCAATTAAGCAATCAGCAGGAAGTTTGCTGCGCACTTTGCCTTATCATCGTTCGCTCTCTTTCTAGCCGCGTGTCGCCGTCTCTTTCATGTGGAACTCGCTTCATTGCATCAGAAAAATCACATCATCAAAAGCCTGCGTCTTTTTTTTAACCGATACCCTCGATCGGGATA	chrX_8510602_8510850_+_dCP_twist_center67	twist	CCCATATGC	67	AP1	ATGAGTCAC	344	299	267	2653	3979	4170	8.67275	6.10108	2.57167	2.95112	-3.14995	5.72162
chrX_8510602_8510850_+_dCP_twist_center67_to_Trl	chrX_8510602_8510850	-	GGCCACCAACAATGACATGTGTGATGGGCGGTGTGGGTATATTCATATATTCATTCATGCATCGAGAGAGCTCTTTGTCAATTAAGCAATCAGCAGGAAGTTTGCTGCGCACTTTGCCTTATCATCGTTCGCTCTCTTTCTAGCCGCGTGTCGCCGTCTCTTTCATGTGGAACTCGCTTCATTGCATCAGAAAAATCACATCATCAAAAGCCTGCGTCTTTTTTTTAACCGATACCCTCGATCGGGATA	chrX_8510602_8510850_+_dCP_twist_center67	twist	CCATATG	67	Trl	GAGAGAG	264	289	260	510	710	748	6.3649	6.10108	0.263822	2.95112	-3.14995	3.41378
chrX_8510602_8510850_+_dCP_twist_center67_to_ETS	chrX_8510602_8510850	-	GGCCACCAACAATGACATGTGTGATGGGCGGTGTGGGTATATTCATATATTCATTCATGCATACCGGAAGTTCTTTGTCAATTAAGCAATCAGCAGGAAGTTTGCTGCGCACTTTGCCTTATCATCGTTCGCTCTCTTTCTAGCCGCGTGTCGCCGTCTCTTTCATGTGGAACTCGCTTCATTGCATCAGAAAAATCACATCATCAAAAGCCTGCGTCTTTTTTTTAACCGATACCCTCGATCGGGATA	chrX_8510602_8510850_+_dCP_twist_center67	twist	CCCATATGC	67	ETS	ACCGGAAGT	210	185	201	2822	3421	3793	9.16102	6.10108	3.05994	2.95112	-3.14995	6.20989
chrX_8510602_8510850_+_dCP_twist_center67_to_SREBP	chrX_8510602_8510850	-	GGCCACCAACAATGACATGTGTGATGGGCGGTGTGGGTATATTCATATATTCATTCATGCATATCACGCGACCTTTGTCAATTAAGCAATCAGCAGGAAGTTTGCTGCGCACTTTGCCTTATCATCGTTCGCTCTCTTTCTAGCCGCGTGTCGCCGTCTCTTTCATGTGGAACTCGCTTCATTGCATCAGAAAAATCACATCATCAAAAGCCTGCGTCTTTTTTTTAACCGATACCCTCGATCGGGATA	chrX_8510602_8510850_+_dCP_twist_center67	twist	CCCATATGCT	67	SREBP	ATCACGCGAC	480	410	371	3237	4608	4889	8.43715	6.10108	2.33607	2.95112	-3.14995	5.48602
chrX_8510602_8510850_+_dCP_twist_center67_to_Stat92E	chrX_8510602_8510850	-	GGCCACCAACAATGACATGTGTGATGGGCGGTGTGGGTATATTCATATATTCATTCATGCATTTCCCGGAAACTTTGTCAATTAAGCAATCAGCAGGAAGTTTGCTGCGCACTTTGCCTTATCATCGTTCGCTCTCTTTCTAGCCGCGTGTCGCCGTCTCTTTCATGTGGAACTCGCTTCATTGCATCAGAAAAATCACATCATCAAAAGCCTGCGTCTTTTTTTTAACCGATACCCTCGATCGGGATA	chrX_8510602_8510850_+_dCP_twist_center67	twist	TCCCATATGCT	67	Stat92E	TTTCCCGGAAA	377	325	285	1757	2138	2292	7.74121	6.10108	1.64013	2.95112	-3.14995	4.79008
chrX_8510602_8510850_+_dCP_twist_center67_to_Atf2	chrX_8510602_8510850	-	GGCCACCAACAATGACATGTGTGATGGGCGGTGTGGGTATATTCATATATTCATTCATGCAATCACGTCATCCTTTGTCAATTAAGCAATCAGCAGGAAGTTTGCTGCGCACTTTGCCTTATCATCGTTCGCTCTCTTTCTAGCCGCGTGTCGCCGTCTCTTTCATGTGGAACTCGCTTCATTGCATCAGAAAAATCACATCATCAAAAGCCTGCGTCTTTTTTTTAACCGATACCCTCGATCGGGATA	chrX_8510602_8510850_+_dCP_twist_center67	twist	TCCCATATGCT	67	Atf2	ATCACGTCATC	208	195	189	533	786	943	7.02479	6.10108	0.923712	2.95112	-3.14995	4.07367
chrX_9095326_9095574_+_dCP_twist_center165_to_GATAA	chrX_9095326_9095574	+	TCTCGCGCACACTCTAGCGCGCTGATTAAGAATTTTTATAGATGTATTTTGTTTTTTTCGTTTTTGTCATAATAGTTGAAGCCCCCAGCTGCTGTTTGTTCATTATCAGTTTGGCTTCGTGGTCCGGCAAGTTTTTGAATATGTTTTCATTATACGTAGGTAGATAAGAATATGCTATATGCTAATGGCGAAATGCGAAAAACAAGTTCAGAATTCGAGCTGCTGCTTATGCTTAAATTGGGTTTCGTT	chrX_9095326_9095574_+_dCP_twist_center165	twist	ACATATGT	165	GATAA	AGATAAGA	143	127	102	127	92	107	4.87176	4.5326	0.339162	2.15577	-2.37683	2.71599
chrX_9095326_9095574_+_dCP_twist_center165_to_AP1	chrX_9095326_9095574	+	TCTCGCGCACACTCTAGCGCGCTGATTAAGAATTTTTATAGATGTATTTTGTTTTTTTCGTTTTTGTCATAATAGTTGAAGCCCCCAGCTGCTGTTTGTTCATTATCAGTTTGGCTTCGTGGTCCGGCAAGTTTTTGAATATGTTTTCATTATACGTAGGATGAGTCACATATGCTATATGCTAATGGCGAAATGCGAAAAACAAGTTCAGAATTCGAGCTGCTGCTTATGCTTAAATTGGGTTTCGTT	chrX_9095326_9095574_+_dCP_twist_center165	twist	TACATATGT	165	AP1	ATGAGTCAC	83	74	95	283	208	294	6.69165	4.5326	2.15905	2.15577	-2.37683	4.53588
chrX_9095326_9095574_+_dCP_twist_center165_to_Trl	chrX_9095326_9095574	+	TCTCGCGCACACTCTAGCGCGCTGATTAAGAATTTTTATAGATGTATTTTGTTTTTTTCGTTTTTGTCATAATAGTTGAAGCCCCCAGCTGCTGTTTGTTCATTATCAGTTTGGCTTCGTGGTCCGGCAAGTTTTTGAATATGTTTTCATTATACGTAGGTGAGAGAGTATATGCTATATGCTAATGGCGAAATGCGAAAAACAAGTTCAGAATTCGAGCTGCTGCTTATGCTTAAATTGGGTTTCGTT	chrX_9095326_9095574_+_dCP_twist_center165	twist	ACATATG	165	Trl	GAGAGAG	127	123	120	32	23	31	2.9497	4.5326	-1.5829	2.15577	-2.37683	0.793931
chrX_9095326_9095574_+_dCP_twist_center165_to_ETS	chrX_9095326_9095574	+	TCTCGCGCACACTCTAGCGCGCTGATTAAGAATTTTTATAGATGTATTTTGTTTTTTTCGTTTTTGTCATAATAGTTGAAGCCCCCAGCTGCTGTTTGTTCATTATCAGTTTGGCTTCGTGGTCCGGCAAGTTTTTGAATATGTTTTCATTATACGTAGGACCGGAAGTATATGCTATATGCTAATGGCGAAATGCGAAAAACAAGTTCAGAATTCGAGCTGCTGCTTATGCTTAAATTGGGTTTCGTT	chrX_9095326_9095574_+_dCP_twist_center165	twist	TACATATGT	165	ETS	ACCGGAAGT	70	83	69	174	141	179	6.21047	4.5326	1.67787	2.15577	-2.37683	4.05469
chrX_9095326_9095574_+_dCP_twist_center165_to_SREBP	chrX_9095326_9095574	+	TCTCGCGCACACTCTAGCGCGCTGATTAAGAATTTTTATAGATGTATTTTGTTTTTTTCGTTTTTGTCATAATAGTTGAAGCCCCCAGCTGCTGTTTGTTCATTATCAGTTTGGCTTCGTGGTCCGGCAAGTTTTTGAATATGTTTTCATTATACGTAGGATCACGCGACTATGCTATATGCTAATGGCGAAATGCGAAAAACAAGTTCAGAATTCGAGCTGCTGCTTATGCTTAAATTGGGTTTCGTT	chrX_9095326_9095574_+_dCP_twist_center165	twist	TACATATGTA	165	SREBP	ATCACGCGAC	82	59	68	214	172	214	6.58765	4.5326	2.05504	2.15577	-2.37683	4.43187
chrX_9095326_9095574_+_dCP_twist_center165_to_Stat92E	chrX_9095326_9095574	+	TCTCGCGCACACTCTAGCGCGCTGATTAAGAATTTTTATAGATGTATTTTGTTTTTTTCGTTTTTGTCATAATAGTTGAAGCCCCCAGCTGCTGTTTGTTCATTATCAGTTTGGCTTCGTGGTCCGGCAAGTTTTTGAATATGTTTTCATTATACGTAGTTTCCCGGAAATATGCTATATGCTAATGGCGAAATGCGAAAAACAAGTTCAGAATTCGAGCTGCTGCTTATGCTTAAATTGGGTTTCGTT	chrX_9095326_9095574_+_dCP_twist_center165	twist	GTACATATGTA	165	Stat92E	TTTCCCGGAAA	84	65	62	96	46	55	4.94867	4.5326	0.416066	2.15577	-2.37683	2.7929
chrX_9095326_9095574_+_dCP_twist_center165_to_Atf2	chrX_9095326_9095574	+	TCTCGCGCACACTCTAGCGCGCTGATTAAGAATTTTTATAGATGTATTTTGTTTTTTTCGTTTTTGTCATAATAGTTGAAGCCCCCAGCTGCTGTTTGTTCATTATCAGTTTGGCTTCGTGGTCCGGCAAGTTTTTGAATATGTTTTCATTATACGTAGATCACGTCATCTATGCTATATGCTAATGGCGAAATGCGAAAAACAAGTTCAGAATTCGAGCTGCTGCTTATGCTTAAATTGGGTTTCGTT	chrX_9095326_9095574_+_dCP_twist_center165	twist	GTACATATGTA	165	Atf2	ATCACGTCATC	110	83	120	145	125	156	5.5095	4.5326	0.976902	2.15577	-2.37683	3.35373
chr2L_14024051_14024299_+_dCP_twist_center31_to_GATAA	chr2L_14024051_14024299	+	CCGCTTGTTTGTCAATATGTACAGAGTAGATAAGATATTTGATTTTCGTTTCGCTTTTTATGTCTGCGATGTGCTGTGGCTGTTGTTGTTGCTTTTGCTTTTGCTGTTGGTACATGAATATAAATGCTGTTTATCTCTGCCTCCCCTTTTCCGCCCCACCAGCACCCCCTCCATGTGTGCCTGTGTGTGCGTGTGTGGCTCGAGTGTATATGCACGAATGTGTTTCCTTATTGTTGTGTGTACTTGTTT	chr2L_14024051_14024299_+_dCP_twist_center31	twist	ACACATGT	31	GATAA	AGATAAGA	637	512	588	520	418	542	4.83214	4.1943	0.637844	1.84883	-2.34547	2.98331
chr2L_14024051_14024299_+_dCP_twist_center31_to_AP1	chr2L_14024051_14024299	+	CCGCTTGTTTGTCAATATGTACAGAGATGAGTCACTATTTGATTTTCGTTTCGCTTTTTATGTCTGCGATGTGCTGTGGCTGTTGTTGTTGCTTTTGCTTTTGCTGTTGGTACATGAATATAAATGCTGTTTATCTCTGCCTCCCCTTTTCCGCCCCACCAGCACCCCCTCCATGTGTGCCTGTGTGTGCGTGTGTGGCTCGAGTGTATATGCACGAATGTGTTTCCTTATTGTTGTGTGTACTTGTTT	chr2L_14024051_14024299_+_dCP_twist_center31	twist	TACACATGT	31	AP1	ATGAGTCAC	451	377	367	1066	953	1147	6.47786	4.1943	2.28356	1.84883	-2.34547	4.62903
chr2L_14024051_14024299_+_dCP_twist_center31_to_Trl	chr2L_14024051_14024299	+	CCGCTTGTTTGTCAATATGTACAGAGTGAGAGAGTTATTTGATTTTCGTTTCGCTTTTTATGTCTGCGATGTGCTGTGGCTGTTGTTGTTGCTTTTGCTTTTGCTGTTGGTACATGAATATAAATGCTGTTTATCTCTGCCTCCCCTTTTCCGCCCCACCAGCACCCCCTCCATGTGTGCCTGTGTGTGCGTGTGTGGCTCGAGTGTATATGCACGAATGTGTTTCCTTATTGTTGTGTGTACTTGTTT	chr2L_14024051_14024299_+_dCP_twist_center31	twist	ACACATG	31	Trl	GAGAGAG	574	492	566	363	276	370	4.36348	4.1943	0.169185	1.84883	-2.34547	2.51466
chr2L_14024051_14024299_+_dCP_twist_center31_to_ETS	chr2L_14024051_14024299	+	CCGCTTGTTTGTCAATATGTACAGAGACCGGAAGTTATTTGATTTTCGTTTCGCTTTTTATGTCTGCGATGTGCTGTGGCTGTTGTTGTTGCTTTTGCTTTTGCTGTTGGTACATGAATATAAATGCTGTTTATCTCTGCCTCCCCTTTTCCGCCCCACCAGCACCCCCTCCATGTGTGCCTGTGTGTGCGTGTGTGGCTCGAGTGTATATGCACGAATGTGTTTCCTTATTGTTGTGTGTACTTGTTT	chr2L_14024051_14024299_+_dCP_twist_center31	twist	TACACATGT	31	ETS	ACCGGAAGT	798	702	699	3274	2840	3451	7.18938	4.1943	2.99508	1.84883	-2.34547	5.34055
chr2L_14024051_14024299_+_dCP_twist_center31_to_SREBP	chr2L_14024051_14024299	+	CCGCTTGTTTGTCAATATGTACAGAGATCACGCGACATTTGATTTTCGTTTCGCTTTTTATGTCTGCGATGTGCTGTGGCTGTTGTTGTTGCTTTTGCTTTTGCTGTTGGTACATGAATATAAATGCTGTTTATCTCTGCCTCCCCTTTTCCGCCCCACCAGCACCCCCTCCATGTGTGCCTGTGTGTGCGTGTGTGGCTCGAGTGTATATGCACGAATGTGTTTCCTTATTGTTGTGTGTACTTGTTT	chr2L_14024051_14024299_+_dCP_twist_center31	twist	TACACATGTT	31	SREBP	ATCACGCGAC	461	407	421	3258	3076	3605	8.02021	4.1943	3.82591	1.84883	-2.34547	6.17138
chr2L_14024051_14024299_+_dCP_twist_center31_to_Stat92E	chr2L_14024051_14024299	+	CCGCTTGTTTGTCAATATGTACAGATTTCCCGGAAAATTTGATTTTCGTTTCGCTTTTTATGTCTGCGATGTGCTGTGGCTGTTGTTGTTGCTTTTGCTTTTGCTGTTGGTACATGAATATAAATGCTGTTTATCTCTGCCTCCCCTTTTCCGCCCCACCAGCACCCCCTCCATGTGTGCCTGTGTGTGCGTGTGTGGCTCGAGTGTATATGCACGAATGTGTTTCCTTATTGTTGTGTGTACTTGTTT	chr2L_14024051_14024299_+_dCP_twist_center31	twist	GTACACATGTT	31	Stat92E	TTTCCCGGAAA	907	797	809	114	85	88	1.93212	4.1943	-2.26218	1.84883	-2.34547	0.0832875
chr2L_14024051_14024299_+_dCP_twist_center31_to_Atf2	chr2L_14024051_14024299	+	CCGCTTGTTTGTCAATATGTACAGAATCACGTCATCATTTGATTTTCGTTTCGCTTTTTATGTCTGCGATGTGCTGTGGCTGTTGTTGTTGCTTTTGCTTTTGCTGTTGGTACATGAATATAAATGCTGTTTATCTCTGCCTCCCCTTTTCCGCCCCACCAGCACCCCCTCCATGTGTGCCTGTGTGTGCGTGTGTGGCTCGAGTGTATATGCACGAATGTGTTTCCTTATTGTTGTGTGTACTTGTTT	chr2L_14024051_14024299_+_dCP_twist_center31	twist	GTACACATGTT	31	Atf2	ATCACGTCATC	633	518	538	1293	1206	1399	6.28219	4.1943	2.08789	1.84883	-2.34547	4.43336
chr3L_5195589_5195837_+_dCP_twist_center23_to_GATAA	chr3L_5195589_5195837	+	ATATCCGGCTTAGTCACTAAGATAAGACCTCATAAACGAGTCGCACATTTGTCACACATTTTAATCTAATTAGGGCTCCCCTTGGAACTCGCCACCACCCCAATTTCCCTGCCAAAAACATGCAAATCAAACAAAAAAGTTGCCAAATTTCTCTGTTTCTCTCGCCTGGCAAATTTCACTCCCTAAACAGTCGTTATCATTAGCTAACAATACGACAAAGGGCAACAAAAAAAAGAACTATTCCCAAAA	chr3L_5195589_5195837_+_dCP_twist_center23	twist	ACAGCTGC	23	GATAA	AGATAAGA	40	33	39	87	57	54	5.88115	4.91596	0.965196	2.71053	-2.20543	3.17063
chr3L_5195589_5195837_+_dCP_twist_center23_to_AP1	chr3L_5195589_5195837	+	ATATCCGGCTTAGTCACTATGAGTCACCCTCATAAACGAGTCGCACATTTGTCACACATTTTAATCTAATTAGGGCTCCCCTTGGAACTCGCCACCACCCCAATTTCCCTGCCAAAAACATGCAAATCAAACAAAAAAGTTGCCAAATTTCTCTGTTTCTCTCGCCTGGCAAATTTCACTCCCTAAACAGTCGTTATCATTAGCTAACAATACGACAAAGGGCAACAAAAAAAAGAACTATTCCCAAAA	chr3L_5195589_5195837_+_dCP_twist_center23	twist	AACAGCTGC	23	AP1	ATGAGTCAC	60	57	74	115	127	138	6.06673	4.91596	1.15078	2.71053	-2.20543	3.35621
chr3L_5195589_5195837_+_dCP_twist_center23_to_Trl	chr3L_5195589_5195837	+	ATATCCGGCTTAGTCACTAGAGAGAGCCCTCATAAACGAGTCGCACATTTGTCACACATTTTAATCTAATTAGGGCTCCCCTTGGAACTCGCCACCACCCCAATTTCCCTGCCAAAAACATGCAAATCAAACAAAAAAGTTGCCAAATTTCTCTGTTTCTCTCGCCTGGCAAATTTCACTCCCTAAACAGTCGTTATCATTAGCTAACAATACGACAAAGGGCAACAAAAAAAAGAACTATTCCCAAAA	chr3L_5195589_5195837_+_dCP_twist_center23	twist	ACAGCTG	23	Trl	GAGAGAG	22	24	29	4	5	8	2.91386	4.91596	-2.0021	2.71053	-2.20543	0.203333
chr3L_5195589_5195837_+_dCP_twist_center23_to_ETS	chr3L_5195589_5195837	+	ATATCCGGCTTAGTCACTACCGGAAGTCCTCATAAACGAGTCGCACATTTGTCACACATTTTAATCTAATTAGGGCTCCCCTTGGAACTCGCCACCACCCCAATTTCCCTGCCAAAAACATGCAAATCAAACAAAAAAGTTGCCAAATTTCTCTGTTTCTCTCGCCTGGCAAATTTCACTCCCTAAACAGTCGTTATCATTAGCTAACAATACGACAAAGGGCAACAAAAAAAAGAACTATTCCCAAAA	chr3L_5195589_5195837_+_dCP_twist_center23	twist	AACAGCTGC	23	ETS	ACCGGAAGT	43	28	50	21	14	26	4.06439	4.91596	-0.851563	2.71053	-2.20543	1.35387
chr3L_5195589_5195837_+_dCP_twist_center23_to_SREBP	chr3L_5195589_5195837	+	ATATCCGGCTTAGTCACTATCACGCGACCTCATAAACGAGTCGCACATTTGTCACACATTTTAATCTAATTAGGGCTCCCCTTGGAACTCGCCACCACCCCAATTTCCCTGCCAAAAACATGCAAATCAAACAAAAAAGTTGCCAAATTTCTCTGTTTCTCTCGCCTGGCAAATTTCACTCCCTAAACAGTCGTTATCATTAGCTAACAATACGACAAAGGGCAACAAAAAAAAGAACTATTCCCAAAA	chr3L_5195589_5195837_+_dCP_twist_center23	twist	AACAGCTGCC	23	SREBP	ATCACGCGAC	96	85	85	97	110	123	5.38917	4.91596	0.473219	2.71053	-2.20543	2.67865
chr3L_5195589_5195837_+_dCP_twist_center23_to_Stat92E	chr3L_5195589_5195837	+	ATATCCGGCTTAGTCACTTTCCCGGAAACTCATAAACGAGTCGCACATTTGTCACACATTTTAATCTAATTAGGGCTCCCCTTGGAACTCGCCACCACCCCAATTTCCCTGCCAAAAACATGCAAATCAAACAAAAAAGTTGCCAAATTTCTCTGTTTCTCTCGCCTGGCAAATTTCACTCCCTAAACAGTCGTTATCATTAGCTAACAATACGACAAAGGGCAACAAAAAAAAGAACTATTCCCAAAA	chr3L_5195589_5195837_+_dCP_twist_center23	twist	TAACAGCTGCC	23	Stat92E	TTTCCCGGAAA	33	33	31	37	25	30	4.97903	4.91596	0.0630712	2.71053	-2.20543	2.2685
chr3L_5195589_5195837_+_dCP_twist_center23_to_Atf2	chr3L_5195589_5195837	+	ATATCCGGCTTAGTCACATCACGTCATCCTCATAAACGAGTCGCACATTTGTCACACATTTTAATCTAATTAGGGCTCCCCTTGGAACTCGCCACCACCCCAATTTCCCTGCCAAAAACATGCAAATCAAACAAAAAAGTTGCCAAATTTCTCTGTTTCTCTCGCCTGGCAAATTTCACTCCCTAAACAGTCGTTATCATTAGCTAACAATACGACAAAGGGCAACAAAAAAAAGAACTATTCCCAAAA	chr3L_5195589_5195837_+_dCP_twist_center23	twist	TAACAGCTGCC	23	Atf2	ATCACGTCATC	31	26	26	19	12	21	4.37998	4.91596	-0.53598	2.71053	-2.20543	1.66945
chr2R_15794308_15794556_+_dCP_twist_center212_to_GATAA	chr2R_15794308_15794556	+	AACAACGCGCAGTGCCAGTCATGATGTGCGATATTAAAATTAAGTGTTACATTTGTCAGCGATGATGCGCGTCAAAGAGCAAACGAGATCTGATATAGAACCGATTCGAATCCAGAACTGCAGTTACGAGTGGGTGATACATAATCAAAGCTGAGTGAACGTATTTATGAATCACTTGGCCATTTCGTCAGAGTGCTGCCATTGATCAAGATAAGACAACAAAGCCGATCTAATTCGTAAAAGCTTATG	chr2R_15794308_15794556_+_dCP_twist_center212	twist	ACAGATGA	212	GATAA	AGATAAGA	70	55	65	14	12	16	2.88365	4.7248	-1.84115	2.29741	-2.42739	0.586237
chr2R_15794308_15794556_+_dCP_twist_center212_to_AP1	chr2R_15794308_15794556	+	AACAACGCGCAGTGCCAGTCATGATGTGCGATATTAAAATTAAGTGTTACATTTGTCAGCGATGATGCGCGTCAAAGAGCAAACGAGATCTGATATAGAACCGATTCGAATCCAGAACTGCAGTTACGAGTGGGTGATACATAATCAAAGCTGAGTGAACGTATTTATGAATCACTTGGCCATTTCGTCAGAGTGCTGCCATTGATCATGAGTCACCAACAAAGCCGATCTAATTCGTAAAAGCTTATG	chr2R_15794308_15794556_+_dCP_twist_center212	twist	AACAGATGA	212	AP1	ATGAGTCAC	89	95	94	48	68	95	4.67401	4.7248	-0.0507914	2.29741	-2.42739	2.3766
chr2R_15794308_15794556_+_dCP_twist_center212_to_Trl	chr2R_15794308_15794556	+	AACAACGCGCAGTGCCAGTCATGATGTGCGATATTAAAATTAAGTGTTACATTTGTCAGCGATGATGCGCGTCAAAGAGCAAACGAGATCTGATATAGAACCGATTCGAATCCAGAACTGCAGTTACGAGTGGGTGATACATAATCAAAGCTGAGTGAACGTATTTATGAATCACTTGGCCATTTCGTCAGAGTGCTGCCATTGATCAGAGAGAGACAACAAAGCCGATCTAATTCGTAAAAGCTTATG	chr2R_15794308_15794556_+_dCP_twist_center212	twist	ACAGATG	212	Trl	GAGAGAG	30	27	33	5	9	9	3.09817	4.7248	-1.62663	2.29741	-2.42739	0.800756
chr2R_15794308_15794556_+_dCP_twist_center212_to_ETS	chr2R_15794308_15794556	+	AACAACGCGCAGTGCCAGTCATGATGTGCGATATTAAAATTAAGTGTTACATTTGTCAGCGATGATGCGCGTCAAAGAGCAAACGAGATCTGATATAGAACCGATTCGAATCCAGAACTGCAGTTACGAGTGGGTGATACATAATCAAAGCTGAGTGAACGTATTTATGAATCACTTGGCCATTTCGTCAGAGTGCTGCCATTGATCACCGGAAGTCAACAAAGCCGATCTAATTCGTAAAAGCTTATG	chr2R_15794308_15794556_+_dCP_twist_center212	twist	AACAGATGA	212	ETS	ACCGGAAGT	106	76	75	47	67	70	4.61219	4.7248	-0.112614	2.29741	-2.42739	2.31477
chr2R_15794308_15794556_+_dCP_twist_center212_to_SREBP	chr2R_15794308_15794556	+	AACAACGCGCAGTGCCAGTCATGATGTGCGATATTAAAATTAAGTGTTACATTTGTCAGCGATGATGCGCGTCAAAGAGCAAACGAGATCTGATATAGAACCGATTCGAATCCAGAACTGCAGTTACGAGTGGGTGATACATAATCAAAGCTGAGTGAACGTATTTATGAATCACTTGGCCATTTCGTCAGAGTGCTGCCATTGATCATCACGCGACAACAAAGCCGATCTAATTCGTAAAAGCTTATG	chr2R_15794308_15794556_+_dCP_twist_center212	twist	AACAGATGAC	212	SREBP	ATCACGCGAC	39	35	36	34	97	100	6.18759	4.7248	1.46279	2.29741	-2.42739	3.89017
chr2R_15794308_15794556_+_dCP_twist_center212_to_Stat92E	chr2R_15794308_15794556	+	AACAACGCGCAGTGCCAGTCATGATGTGCGATATTAAAATTAAGTGTTACATTTGTCAGCGATGATGCGCGTCAAAGAGCAAACGAGATCTGATATAGAACCGATTCGAATCCAGAACTGCAGTTACGAGTGGGTGATACATAATCAAAGCTGAGTGAACGTATTTATGAATCACTTGGCCATTTCGTCAGAGTGCTGCCATTGATTTTCCCGGAAAAACAAAGCCGATCTAATTCGTAAAAGCTTATG	chr2R_15794308_15794556_+_dCP_twist_center212	twist	CAACAGATGAC	212	Stat92E	TTTCCCGGAAA	35	29	30	6	1	5	2.08126	4.7248	-2.64354	2.29741	-2.42739	-0.216152
chr2R_15794308_15794556_+_dCP_twist_center212_to_Atf2	chr2R_15794308_15794556	+	AACAACGCGCAGTGCCAGTCATGATGTGCGATATTAAAATTAAGTGTTACATTTGTCAGCGATGATGCGCGTCAAAGAGCAAACGAGATCTGATATAGAACCGATTCGAATCCAGAACTGCAGTTACGAGTGGGTGATACATAATCAAAGCTGAGTGAACGTATTTATGAATCACTTGGCCATTTCGTCAGAGTGCTGCCATTGATATCACGTCATCAACAAAGCCGATCTAATTCGTAAAAGCTTATG	chr2R_15794308_15794556_+_dCP_twist_center212	twist	CAACAGATGAC	212	Atf2	ATCACGTCATC	48	45	62	19	27	17	3.78283	4.7248	-0.941971	2.29741	-2.42739	1.48542
chr2R_14662879_14663127_+_dCP_twist_center200_to_GATAA	chr2R_14662879_14663127	+	GATAACCACGCCATAATTTCCATTGGGATCTTTCAATGTTGTTTGTTTTGCTCGACTCTATGCTCTGTTTACCTGGCAAGCTTTATGAATTAAAAACGATCTCCATGTGGAATCTAATGCCACGAGTGCTGGAGATAACCCCTAATCAGGAATTGTATTTGCAGGGGTCTCATAAGTGGCAATAAAATATAGCAACAGATAAGATTTTTTGTAGGTGCTTATCAGCACTCGGAGTTCCGTTCGTCAGAC	chr2R_14662879_14663127_+_dCP_twist_center200	twist	CCAGATGC	200	GATAA	AGATAAGA	52	63	49	10	21	18	3.33698	5.11285	-1.77587	1.92484	-3.18801	1.41214
chr2R_14662879_14663127_+_dCP_twist_center200_to_AP1	chr2R_14662879_14663127	+	GATAACCACGCCATAATTTCCATTGGGATCTTTCAATGTTGTTTGTTTTGCTCGACTCTATGCTCTGTTTACCTGGCAAGCTTTATGAATTAAAAACGATCTCCATGTGGAATCTAATGCCACGAGTGCTGGAGATAACCCCTAATCAGGAATTGTATTTGCAGGGGTCTCATAAGTGGCAATAAAATATAGCAAATGAGTCACTTTTTTGTAGGTGCTTATCAGCACTCGGAGTTCCGTTCGTCAGAC	chr2R_14662879_14663127_+_dCP_twist_center200	twist	CCCAGATGC	200	AP1	ATGAGTCAC	66	73	81	78	71	72	5.06981	5.11285	-0.0430366	1.92484	-3.18801	3.14497
chr2R_14662879_14663127_+_dCP_twist_center200_to_Trl	chr2R_14662879_14663127	+	GATAACCACGCCATAATTTCCATTGGGATCTTTCAATGTTGTTTGTTTTGCTCGACTCTATGCTCTGTTTACCTGGCAAGCTTTATGAATTAAAAACGATCTCCATGTGGAATCTAATGCCACGAGTGCTGGAGATAACCCCTAATCAGGAATTGTATTTGCAGGGGTCTCATAAGTGGCAATAAAATATAGCAACGAGAGAGCTTTTTTGTAGGTGCTTATCAGCACTCGGAGTTCCGTTCGTCAGAC	chr2R_14662879_14663127_+_dCP_twist_center200	twist	CCAGATG	200	Trl	GAGAGAG	123	97	102	78	32	71	4.2034	5.11285	-0.909449	1.92484	-3.18801	2.27856
chr2R_14662879_14663127_+_dCP_twist_center200_to_ETS	chr2R_14662879_14663127	+	GATAACCACGCCATAATTTCCATTGGGATCTTTCAATGTTGTTTGTTTTGCTCGACTCTATGCTCTGTTTACCTGGCAAGCTTTATGAATTAAAAACGATCTCCATGTGGAATCTAATGCCACGAGTGCTGGAGATAACCCCTAATCAGGAATTGTATTTGCAGGGGTCTCATAAGTGGCAATAAAATATAGCAAACCGGAAGTTTTTTTGTAGGTGCTTATCAGCACTCGGAGTTCCGTTCGTCAGAC	chr2R_14662879_14663127_+_dCP_twist_center200	twist	CCCAGATGC	200	ETS	ACCGGAAGT	53	61	41	128	97	129	6.24714	5.11285	1.13429	1.92484	-3.18801	4.3223
chr2R_14662879_14663127_+_dCP_twist_center200_to_SREBP	chr2R_14662879_14663127	+	GATAACCACGCCATAATTTCCATTGGGATCTTTCAATGTTGTTTGTTTTGCTCGACTCTATGCTCTGTTTACCTGGCAAGCTTTATGAATTAAAAACGATCTCCATGTGGAATCTAATGCCACGAGTGCTGGAGATAACCCCTAATCAGGAATTGTATTTGCAGGGGTCTCATAAGTGGCAATAAAATATAGCAAATCACGCGACTTTTTGTAGGTGCTTATCAGCACTCGGAGTTCCGTTCGTCAGAC	chr2R_14662879_14663127_+_dCP_twist_center200	twist	CCCAGATGCT	200	SREBP	ATCACGCGAC	77	69	78	151	134	183	6.12501	5.11285	1.01216	1.92484	-3.18801	4.20017
chr2R_14662879_14663127_+_dCP_twist_center200_to_Stat92E	chr2R_14662879_14663127	+	GATAACCACGCCATAATTTCCATTGGGATCTTTCAATGTTGTTTGTTTTGCTCGACTCTATGCTCTGTTTACCTGGCAAGCTTTATGAATTAAAAACGATCTCCATGTGGAATCTAATGCCACGAGTGCTGGAGATAACCCCTAATCAGGAATTGTATTTGCAGGGGTCTCATAAGTGGCAATAAAATATAGCATTTCCCGGAAATTTTTGTAGGTGCTTATCAGCACTCGGAGTTCCGTTCGTCAGAC	chr2R_14662879_14663127_+_dCP_twist_center200	twist	ACCCAGATGCT	200	Stat92E	TTTCCCGGAAA	61	49	69	64	44	62	4.97877	5.11285	-0.13408	1.92484	-3.18801	3.05393
chr2R_14662879_14663127_+_dCP_twist_center200_to_Atf2	chr2R_14662879_14663127	+	GATAACCACGCCATAATTTCCATTGGGATCTTTCAATGTTGTTTGTTTTGCTCGACTCTATGCTCTGTTTACCTGGCAAGCTTTATGAATTAAAAACGATCTCCATGTGGAATCTAATGCCACGAGTGCTGGAGATAACCCCTAATCAGGAATTGTATTTGCAGGGGTCTCATAAGTGGCAATAAAATATAGCAATCACGTCATCTTTTTGTAGGTGCTTATCAGCACTCGGAGTTCCGTTCGTCAGAC	chr2R_14662879_14663127_+_dCP_twist_center200	twist	ACCCAGATGCT	200	Atf2	ATCACGTCATC	89	70	88	53	49	59	4.44869	5.11285	-0.664163	1.92484	-3.18801	2.52385
chr3L_887685_887933_+_dCP_twist_center185_to_GATAA	chr3L_887685_887933	+	CTACTCTCCACCACCTCGCACTGTTTTTTCCCTACTTGAGTTTGACATGGATTAGTTATGTTTTCTATTTGCACTGATAGCTGCAATCGATGGCCCGCTTATCAGTATCAGAACGAATAAAGCAGAAAGAAGGGGGGGATATGAGAACAATGCCTGCCGGCAGTTATTGGATCATCCATAAAGATAAGAAGACTGAAAACCCCCATGGAGCCGGAAAAGGGAGAGATATGCGTGCTCTCTTTTTGGATC	chr3L_887685_887933_+_dCP_twist_center185	twist	ACATATGT	185	GATAA	AGATAAGA	40	51	37	20	16	22	3.91116	4.72865	-0.81749	1.22776	-3.50088	2.68339
chr3L_887685_887933_+_dCP_twist_center185_to_AP1	chr3L_887685_887933	+	CTACTCTCCACCACCTCGCACTGTTTTTTCCCTACTTGAGTTTGACATGGATTAGTTATGTTTTCTATTTGCACTGATAGCTGCAATCGATGGCCCGCTTATCAGTATCAGAACGAATAAAGCAGAAAGAAGGGGGGGATATGAGAACAATGCCTGCCGGCAGTTATTGGATCATCCATAATGAGTCACAGACTGAAAACCCCCATGGAGCCGGAAAAGGGAGAGATATGCGTGCTCTCTTTTTGGATC	chr3L_887685_887933_+_dCP_twist_center185	twist	AACATATGT	185	AP1	ATGAGTCAC	78	73	77	44	34	51	4.2334	4.72865	-0.495248	1.22776	-3.50088	3.00563
chr3L_887685_887933_+_dCP_twist_center185_to_Trl	chr3L_887685_887933	+	CTACTCTCCACCACCTCGCACTGTTTTTTCCCTACTTGAGTTTGACATGGATTAGTTATGTTTTCTATTTGCACTGATAGCTGCAATCGATGGCCCGCTTATCAGTATCAGAACGAATAAAGCAGAAAGAAGGGGGGGATATGAGAACAATGCCTGCCGGCAGTTATTGGATCATCCATAAGAGAGAGTAGACTGAAAACCCCCATGGAGCCGGAAAAGGGAGAGATATGCGTGCTCTCTTTTTGGATC	chr3L_887685_887933_+_dCP_twist_center185	twist	ACATATG	185	Trl	GAGAGAG	57	49	39	9	4	2	1.7862	4.72865	-2.94244	1.22776	-3.50088	0.55844
chr3L_887685_887933_+_dCP_twist_center185_to_ETS	chr3L_887685_887933	+	CTACTCTCCACCACCTCGCACTGTTTTTTCCCTACTTGAGTTTGACATGGATTAGTTATGTTTTCTATTTGCACTGATAGCTGCAATCGATGGCCCGCTTATCAGTATCAGAACGAATAAAGCAGAAAGAAGGGGGGGATATGAGAACAATGCCTGCCGGCAGTTATTGGATCATCCATAACCGGAAGTAGACTGAAAACCCCCATGGAGCCGGAAAAGGGAGAGATATGCGTGCTCTCTTTTTGGATC	chr3L_887685_887933_+_dCP_twist_center185	twist	AACATATGT	185	ETS	ACCGGAAGT	34	45	39	27	22	24	4.36194	4.72865	-0.366707	1.22776	-3.50088	3.13417
chr3L_887685_887933_+_dCP_twist_center185_to_SREBP	chr3L_887685_887933	+	CTACTCTCCACCACCTCGCACTGTTTTTTCCCTACTTGAGTTTGACATGGATTAGTTATGTTTTCTATTTGCACTGATAGCTGCAATCGATGGCCCGCTTATCAGTATCAGAACGAATAAAGCAGAAAGAAGGGGGGGATATGAGAACAATGCCTGCCGGCAGTTATTGGATCATCCATAATCACGCGACGACTGAAAACCCCCATGGAGCCGGAAAAGGGAGAGATATGCGTGCTCTCTTTTTGGATC	chr3L_887685_887933_+_dCP_twist_center185	twist	AACATATGTA	185	SREBP	ATCACGCGAC	61	58	49	70	58	81	5.3751	4.72865	0.64646	1.22776	-3.50088	4.14734
chr3L_887685_887933_+_dCP_twist_center185_to_Stat92E	chr3L_887685_887933	+	CTACTCTCCACCACCTCGCACTGTTTTTTCCCTACTTGAGTTTGACATGGATTAGTTATGTTTTCTATTTGCACTGATAGCTGCAATCGATGGCCCGCTTATCAGTATCAGAACGAATAAAGCAGAAAGAAGGGGGGGATATGAGAACAATGCCTGCCGGCAGTTATTGGATCATCCATTTTCCCGGAAAGACTGAAAACCCCCATGGAGCCGGAAAAGGGAGAGATATGCGTGCTCTCTTTTTGGATC	chr3L_887685_887933_+_dCP_twist_center185	twist	AAACATATGTA	185	Stat92E	TTTCCCGGAAA	125	99	93	10	9	5	1.34557	4.72865	-3.38307	1.22776	-3.50088	0.117807
chr3L_887685_887933_+_dCP_twist_center185_to_Atf2	chr3L_887685_887933	+	CTACTCTCCACCACCTCGCACTGTTTTTTCCCTACTTGAGTTTGACATGGATTAGTTATGTTTTCTATTTGCACTGATAGCTGCAATCGATGGCCCGCTTATCAGTATCAGAACGAATAAAGCAGAAAGAAGGGGGGGATATGAGAACAATGCCTGCCGGCAGTTATTGGATCATCCATATCACGTCATCGACTGAAAACCCCCATGGAGCCGGAAAAGGGAGAGATATGCGTGCTCTCTTTTTGGATC	chr3L_887685_887933_+_dCP_twist_center185	twist	AAACATATGTA	185	Atf2	ATCACGTCATC	133	130	138	36	28	26	2.90352	4.72865	-1.82512	1.22776	-3.50088	1.67576
chr3L_9056717_9056965_+_dCP_twist_center77_to_GATAA	chr3L_9056717_9056965	-	CTTTTGTGGCTCTAACTCTCATTCGTGATAAGTGCAATCGGCTGATCGCACACATTCAAACATTCTCTGATTTAGATAAGAGCAAAACAAAATTCGCATTTTTTTGGCAAAAAAATAAAGAAAAAAGCGTCCAGTTGTTATCTGCCGGCAATTAGCGTAATAACAAAAGTGATAATTGAAGTTTGGAGCGGTATTAGTTTTTTTCGTTCTCATCCATACAGCCGGCATTTGGGGCCGGTATTTTGCCGA	chr3L_9056717_9056965_+_dCP_twist_center77	twist	GCACATGT	77	GATAA	AGATAAGA	21	18	22	6	10	11	3.89162	3.52647	0.365149	1.48605	-2.04042	2.40557
chr3L_9056717_9056965_+_dCP_twist_center77_to_AP1	chr3L_9056717_9056965	-	CTTTTGTGGCTCTAACTCTCATTCGTGATAAGTGCAATCGGCTGATCGCACACATTCAAACATTCTCTGATTATGAGTCACGCAAAACAAAATTCGCATTTTTTTGGCAAAAAAATAAAGAAAAAAGCGTCCAGTTGTTATCTGCCGGCAATTAGCGTAATAACAAAAGTGATAATTGAAGTTTGGAGCGGTATTAGTTTTTTTCGTTCTCATCCATACAGCCGGCATTTGGGGCCGGTATTTTGCCGA	chr3L_9056717_9056965_+_dCP_twist_center77	twist	TGCACATGT	77	AP1	ATGAGTCAC	32	31	28	20	16	26	4.50271	3.52647	0.97624	1.48605	-2.04042	3.01666
chr3L_9056717_9056965_+_dCP_twist_center77_to_Trl	chr3L_9056717_9056965	-	CTTTTGTGGCTCTAACTCTCATTCGTGATAAGTGCAATCGGCTGATCGCACACATTCAAACATTCTCTGATTTGAGAGAGTGCAAAACAAAATTCGCATTTTTTTGGCAAAAAAATAAAGAAAAAAGCGTCCAGTTGTTATCTGCCGGCAATTAGCGTAATAACAAAAGTGATAATTGAAGTTTGGAGCGGTATTAGTTTTTTTCGTTCTCATCCATACAGCCGGCATTTGGGGCCGGTATTTTGCCGA	chr3L_9056717_9056965_+_dCP_twist_center77	twist	GCACATG	77	Trl	GAGAGAG	133	98	118	14	15	15	2.08126	3.52647	-1.44521	1.48605	-2.04042	0.59521
chr3L_9056717_9056965_+_dCP_twist_center77_to_ETS	chr3L_9056717_9056965	-	CTTTTGTGGCTCTAACTCTCATTCGTGATAAGTGCAATCGGCTGATCGCACACATTCAAACATTCTCTGATTACCGGAAGTGCAAAACAAAATTCGCATTTTTTTGGCAAAAAAATAAAGAAAAAAGCGTCCAGTTGTTATCTGCCGGCAATTAGCGTAATAACAAAAGTGATAATTGAAGTTTGGAGCGGTATTAGTTTTTTTCGTTCTCATCCATACAGCCGGCATTTGGGGCCGGTATTTTGCCGA	chr3L_9056717_9056965_+_dCP_twist_center77	twist	TGCACATGT	77	ETS	ACCGGAAGT	26	30	27	23	21	21	4.70861	3.52647	1.18214	1.48605	-2.04042	3.22255
chr3L_9056717_9056965_+_dCP_twist_center77_to_SREBP	chr3L_9056717_9056965	-	CTTTTGTGGCTCTAACTCTCATTCGTGATAAGTGCAATCGGCTGATCGCACACATTCAAACATTCTCTGATTATCACGCGACCAAAACAAAATTCGCATTTTTTTGGCAAAAAAATAAAGAAAAAAGCGTCCAGTTGTTATCTGCCGGCAATTAGCGTAATAACAAAAGTGATAATTGAAGTTTGGAGCGGTATTAGTTTTTTTCGTTCTCATCCATACAGCCGGCATTTGGGGCCGGTATTTTGCCGA	chr3L_9056717_9056965_+_dCP_twist_center77	twist	TGCACATGTG	77	SREBP	ATCACGCGAC	24	14	25	14	6	13	4.11765	3.52647	0.591176	1.48605	-2.04042	2.63159
chr3L_9056717_9056965_+_dCP_twist_center77_to_Stat92E	chr3L_9056717_9056965	-	CTTTTGTGGCTCTAACTCTCATTCGTGATAAGTGCAATCGGCTGATCGCACACATTCAAACATTCTCTGATTTTCCCGGAAACAAAACAAAATTCGCATTTTTTTGGCAAAAAAATAAAGAAAAAAGCGTCCAGTTGTTATCTGCCGGCAATTAGCGTAATAACAAAAGTGATAATTGAAGTTTGGAGCGGTATTAGTTTTTTTCGTTCTCATCCATACAGCCGGCATTTGGGGCCGGTATTTTGCCGA	chr3L_9056717_9056965_+_dCP_twist_center77	twist	TTGCACATGTG	77	Stat92E	TTTCCCGGAAA	53	39	33	9	5	7	2.48846	3.52647	-1.03802	1.48605	-2.04042	1.0024
chr3L_9056717_9056965_+_dCP_twist_center77_to_Atf2	chr3L_9056717_9056965	-	CTTTTGTGGCTCTAACTCTCATTCGTGATAAGTGCAATCGGCTGATCGCACACATTCAAACATTCTCTGATATCACGTCATCCAAAACAAAATTCGCATTTTTTTGGCAAAAAAATAAAGAAAAAAGCGTCCAGTTGTTATCTGCCGGCAATTAGCGTAATAACAAAAGTGATAATTGAAGTTTGGAGCGGTATTAGTTTTTTTCGTTCTCATCCATACAGCCGGCATTTGGGGCCGGTATTTTGCCGA	chr3L_9056717_9056965_+_dCP_twist_center77	twist	TTGCACATGTG	77	Atf2	ATCACGTCATC	115	95	99	54	38	43	3.86561	3.52647	0.339141	1.48605	-2.04042	2.37956
chr3R_5008324_5008572_+_dCP_twist_center240_to_GATAA	chr3R_5008324_5008572	-	GAGGGATCTATGGTTCTGAATGGTGGTGGTGGTGGTGGGGATGGTTAGCTGGCAGTGATATGAGGGTTTTGCGAGTGATAATCATAATCAGCATACTGTTGTTGCAACTGTCACTGCAGCGGATACACGCACACACACACACACGCATTTTATTTATATTTTTCCGGCCAAGCAGACGTCGTCACCATTATCACCATCACTATCATCATCATCATATGTGGGTCTGCAGCAGTGCTAGATAAGATTTGA	chr3R_5008324_5008572_+_dCP_twist_center240	twist	CCATCTGT	240	GATAA	AGATAAGA	67	49	50	7	4	6	1.77352	3.89934	-2.12582	1.66107	-2.23828	0.112457
chr3R_5008324_5008572_+_dCP_twist_center240_to_AP1	chr3R_5008324_5008572	-	GAGGGATCTATGGTTCTGAATGGTGGTGGTGGTGGTGGGGATGGTTAGCTGGCAGTGATATGAGGGTTTTGCGAGTGATAATCATAATCAGCATACTGTTGTTGCAACTGTCACTGCAGCGGATACACGCACACACACACACACGCATTTTATTTATATTTTTCCGGCCAAGCAGACGTCGTCACCATTATCACCATCACTATCATCATCATCATATGTGGGTCTGCAGCAGTGCATGAGTCACTTTGA	chr3R_5008324_5008572_+_dCP_twist_center240	twist	TCCATCTGT	240	AP1	ATGAGTCAC	92	84	81	90	81	92	5.1001	3.89934	1.20076	1.66107	-2.23828	3.43903
chr3R_5008324_5008572_+_dCP_twist_center240_to_Trl	chr3R_5008324_5008572	-	GAGGGATCTATGGTTCTGAATGGTGGTGGTGGTGGTGGGGATGGTTAGCTGGCAGTGATATGAGGGTTTTGCGAGTGATAATCATAATCAGCATACTGTTGTTGCAACTGTCACTGCAGCGGATACACGCACACACACACACACGCATTTTATTTATATTTTTCCGGCCAAGCAGACGTCGTCACCATTATCACCATCACTATCATCATCATCATATGTGGGTCTGCAGCAGTGCTGAGAGAGTTTTGA	chr3R_5008324_5008572_+_dCP_twist_center240	twist	CCATCTG	240	Trl	GAGAGAG	71	56	59	9	5	9	2.04172	3.89934	-1.85762	1.66107	-2.23828	0.380654
chr3R_5008324_5008572_+_dCP_twist_center240_to_ETS	chr3R_5008324_5008572	-	GAGGGATCTATGGTTCTGAATGGTGGTGGTGGTGGTGGGGATGGTTAGCTGGCAGTGATATGAGGGTTTTGCGAGTGATAATCATAATCAGCATACTGTTGTTGCAACTGTCACTGCAGCGGATACACGCACACACACACACACGCATTTTATTTATATTTTTCCGGCCAAGCAGACGTCGTCACCATTATCACCATCACTATCATCATCATCATATGTGGGTCTGCAGCAGTGCACCGGAAGTTTTGA	chr3R_5008324_5008572_+_dCP_twist_center240	twist	TCCATCTGT	240	ETS	ACCGGAAGT	53	38	34	32	21	30	4.47002	3.89934	0.570678	1.66107	-2.23828	2.80895
chr3R_5008324_5008572_+_dCP_twist_center240_to_SREBP	chr3R_5008324_5008572	-	GAGGGATCTATGGTTCTGAATGGTGGTGGTGGTGGTGGGGATGGTTAGCTGGCAGTGATATGAGGGTTTTGCGAGTGATAATCATAATCAGCATACTGTTGTTGCAACTGTCACTGCAGCGGATACACGCACACACACACACACGCATTTTATTTATATTTTTCCGGCCAAGCAGACGTCGTCACCATTATCACCATCACTATCATCATCATCATATGTGGGTCTGCAGCAGTGCATCACGCGACTTGA	chr3R_5008324_5008572_+_dCP_twist_center240	twist	TCCATCTGTT	240	SREBP	ATCACGCGAC	56	56	51	12	11	11	2.79919	3.89934	-1.10015	1.66107	-2.23828	1.13812
chr3R_5008324_5008572_+_dCP_twist_center240_to_Stat92E	chr3R_5008324_5008572	-	GAGGGATCTATGGTTCTGAATGGTGGTGGTGGTGGTGGGGATGGTTAGCTGGCAGTGATATGAGGGTTTTGCGAGTGATAATCATAATCAGCATACTGTTGTTGCAACTGTCACTGCAGCGGATACACGCACACACACACACACGCATTTTATTTATATTTTTCCGGCCAAGCAGACGTCGTCACCATTATCACCATCACTATCATCATCATCATATGTGGGTCTGCAGCAGTGTTTCCCGGAAATTGA	chr3R_5008324_5008572_+_dCP_twist_center240	twist	CTCCATCTGTT	240	Stat92E	TTTCCCGGAAA	75	64	72	82	59	73	5.07818	3.89934	1.17884	1.66107	-2.23828	3.41712
chr3R_5008324_5008572_+_dCP_twist_center240_to_Atf2	chr3R_5008324_5008572	-	GAGGGATCTATGGTTCTGAATGGTGGTGGTGGTGGTGGGGATGGTTAGCTGGCAGTGATATGAGGGTTTTGCGAGTGATAATCATAATCAGCATACTGTTGTTGCAACTGTCACTGCAGCGGATACACGCACACACACACACACGCATTTTATTTATATTTTTCCGGCCAAGCAGACGTCGTCACCATTATCACCATCACTATCATCATCATCATATGTGGGTCTGCAGCAGTGATCACGTCATCTTGA	chr3R_5008324_5008572_+_dCP_twist_center240	twist	CTCCATCTGTT	240	Atf2	ATCACGTCATC	139	118	96	59	58	58	4.06396	3.89934	0.164618	1.66107	-2.23828	2.40289
chr2R_4485232_4485480_+_dCP_twist_center76_to_GATAA	chr2R_4485232_4485480	+	GATCCAGTCTCGATTGTCTCAGTCTCCATTGCCAAGTCTTCCGTTTCGGCGGTGGCATCCATATCAGCTCCAAGATAAGACAGCTTTTGAAGCAGGGCTCTGCGTGCAGATGGCTCTTTATCTAAAAACGAAATGAGTACTTCAGTTAGGTCGGTATTCAGTGATAATAGGGAGAAACTATTTTCAAATTACTAGTAGAAGTTAATTTCGTCATTGCTATCCAGTTCAGCGTCAGTTATTTGCTATGAA	chr2R_4485232_4485480_+_dCP_twist_center76	twist	CCAGATGG	76	GATAA	AGATAAGA	76	65	67	32	46	48	4.35946	4.54043	-0.180978	2.33286	-2.20758	2.0266
chr2R_4485232_4485480_+_dCP_twist_center76_to_AP1	chr2R_4485232_4485480	+	GATCCAGTCTCGATTGTCTCAGTCTCCATTGCCAAGTCTTCCGTTTCGGCGGTGGCATCCATATCAGCTCCATGAGTCACCAGCTTTTGAAGCAGGGCTCTGCGTGCAGATGGCTCTTTATCTAAAAACGAAATGAGTACTTCAGTTAGGTCGGTATTCAGTGATAATAGGGAGAAACTATTTTCAAATTACTAGTAGAAGTTAATTTCGTCATTGCTATCCAGTTCAGCGTCAGTTATTTGCTATGAA	chr2R_4485232_4485480_+_dCP_twist_center76	twist	ACCAGATGG	76	AP1	ATGAGTCAC	50	47	36	62	70	69	5.67616	4.54043	1.13572	2.33286	-2.20758	3.3433
chr2R_4485232_4485480_+_dCP_twist_center76_to_Trl	chr2R_4485232_4485480	+	GATCCAGTCTCGATTGTCTCAGTCTCCATTGCCAAGTCTTCCGTTTCGGCGGTGGCATCCATATCAGCTCCAGAGAGAGGCAGCTTTTGAAGCAGGGCTCTGCGTGCAGATGGCTCTTTATCTAAAAACGAAATGAGTACTTCAGTTAGGTCGGTATTCAGTGATAATAGGGAGAAACTATTTTCAAATTACTAGTAGAAGTTAATTTCGTCATTGCTATCCAGTTCAGCGTCAGTTATTTGCTATGAA	chr2R_4485232_4485480_+_dCP_twist_center76	twist	CCAGATG	76	Trl	GAGAGAG	52	33	42	12	15	13	3.40926	4.54043	-1.13117	2.33286	-2.20758	1.0764
chr2R_4485232_4485480_+_dCP_twist_center76_to_ETS	chr2R_4485232_4485480	+	GATCCAGTCTCGATTGTCTCAGTCTCCATTGCCAAGTCTTCCGTTTCGGCGGTGGCATCCATATCAGCTCCACCGGAAGTCAGCTTTTGAAGCAGGGCTCTGCGTGCAGATGGCTCTTTATCTAAAAACGAAATGAGTACTTCAGTTAGGTCGGTATTCAGTGATAATAGGGAGAAACTATTTTCAAATTACTAGTAGAAGTTAATTTCGTCATTGCTATCCAGTTCAGCGTCAGTTATTTGCTATGAA	chr2R_4485232_4485480_+_dCP_twist_center76	twist	ACCAGATGG	76	ETS	ACCGGAAGT	100	97	101	138	141	191	5.72342	4.54043	1.18299	2.33286	-2.20758	3.39057
chr2R_4485232_4485480_+_dCP_twist_center76_to_SREBP	chr2R_4485232_4485480	+	GATCCAGTCTCGATTGTCTCAGTCTCCATTGCCAAGTCTTCCGTTTCGGCGGTGGCATCCATATCAGCTCCATCACGCGACAGCTTTTGAAGCAGGGCTCTGCGTGCAGATGGCTCTTTATCTAAAAACGAAATGAGTACTTCAGTTAGGTCGGTATTCAGTGATAATAGGGAGAAACTATTTTCAAATTACTAGTAGAAGTTAATTTCGTCATTGCTATCCAGTTCAGCGTCAGTTATTTGCTATGAA	chr2R_4485232_4485480_+_dCP_twist_center76	twist	ACCAGATGGC	76	SREBP	ATCACGCGAC	50	31	39	13	20	18	3.84927	4.54043	-0.691162	2.33286	-2.20758	1.51641
chr2R_4485232_4485480_+_dCP_twist_center76_to_Stat92E	chr2R_4485232_4485480	+	GATCCAGTCTCGATTGTCTCAGTCTCCATTGCCAAGTCTTCCGTTTCGGCGGTGGCATCCATATCAGCTCTTTCCCGGAAAAGCTTTTGAAGCAGGGCTCTGCGTGCAGATGGCTCTTTATCTAAAAACGAAATGAGTACTTCAGTTAGGTCGGTATTCAGTGATAATAGGGAGAAACTATTTTCAAATTACTAGTAGAAGTTAATTTCGTCATTGCTATCCAGTTCAGCGTCAGTTATTTGCTATGAA	chr2R_4485232_4485480_+_dCP_twist_center76	twist	CACCAGATGGC	76	Stat92E	TTTCCCGGAAA	192	140	161	73	56	82	3.83718	4.54043	-0.703254	2.33286	-2.20758	1.50432
chr2R_4485232_4485480_+_dCP_twist_center76_to_Atf2	chr2R_4485232_4485480	+	GATCCAGTCTCGATTGTCTCAGTCTCCATTGCCAAGTCTTCCGTTTCGGCGGTGGCATCCATATCAGCTCATCACGTCATCAGCTTTTGAAGCAGGGCTCTGCGTGCAGATGGCTCTTTATCTAAAAACGAAATGAGTACTTCAGTTAGGTCGGTATTCAGTGATAATAGGGAGAAACTATTTTCAAATTACTAGTAGAAGTTAATTTCGTCATTGCTATCCAGTTCAGCGTCAGTTATTTGCTATGAA	chr2R_4485232_4485480_+_dCP_twist_center76	twist	CACCAGATGGC	76	Atf2	ATCACGTCATC	171	142	156	88	88	129	4.44536	4.54043	-0.0950718	2.33286	-2.20758	2.1125
chrX_9095326_9095574_+_dCP_twist_center88_to_GATAA	chrX_9095326_9095574	+	TCTCGCGCACACTCTAGCGCGCTGATTAAGAATTTTTATAGATGTATTTTGTTTTTTTCGTTTTTGTCATAATAGTTGAAGCCCAGATAAGATGTTTGTTCATTATCAGTTTGGCTTCGTGGTCCGGCAAGTTTTTGAATATGTTTTCATTATACGTAGGTACATATGTATATGCTATATGCTAATGGCGAAATGCGAAAAACAAGTTCAGAATTCGAGCTGCTGCTTATGCTTAAATTGGGTTTCGTT	chrX_9095326_9095574_+_dCP_twist_center88	twist	CCAGCTGC	88	GATAA	AGATAAGA	104	99	82	41	26	38	3.61288	4.5326	-0.91972	2.59377	-1.93883	1.01911
chrX_9095326_9095574_+_dCP_twist_center88_to_AP1	chrX_9095326_9095574	+	TCTCGCGCACACTCTAGCGCGCTGATTAAGAATTTTTATAGATGTATTTTGTTTTTTTCGTTTTTGTCATAATAGTTGAAGCCATGAGTCACTGTTTGTTCATTATCAGTTTGGCTTCGTGGTCCGGCAAGTTTTTGAATATGTTTTCATTATACGTAGGTACATATGTATATGCTATATGCTAATGGCGAAATGCGAAAAACAAGTTCAGAATTCGAGCTGCTGCTTATGCTTAAATTGGGTTTCGTT	chrX_9095326_9095574_+_dCP_twist_center88	twist	CCCAGCTGC	88	AP1	ATGAGTCAC	70	63	75	189	154	182	6.39776	4.5326	1.86516	2.59377	-1.93883	3.80399
chrX_9095326_9095574_+_dCP_twist_center88_to_Trl	chrX_9095326_9095574	+	TCTCGCGCACACTCTAGCGCGCTGATTAAGAATTTTTATAGATGTATTTTGTTTTTTTCGTTTTTGTCATAATAGTTGAAGCCCGAGAGAGCTGTTTGTTCATTATCAGTTTGGCTTCGTGGTCCGGCAAGTTTTTGAATATGTTTTCATTATACGTAGGTACATATGTATATGCTATATGCTAATGGCGAAATGCGAAAAACAAGTTCAGAATTCGAGCTGCTGCTTATGCTTAAATTGGGTTTCGTT	chrX_9095326_9095574_+_dCP_twist_center88	twist	CCAGCTG	88	Trl	GAGAGAG	83	71	72	33	22	35	3.72654	4.5326	-0.806064	2.59377	-1.93883	1.13277
chrX_9095326_9095574_+_dCP_twist_center88_to_ETS	chrX_9095326_9095574	+	TCTCGCGCACACTCTAGCGCGCTGATTAAGAATTTTTATAGATGTATTTTGTTTTTTTCGTTTTTGTCATAATAGTTGAAGCCACCGGAAGTTGTTTGTTCATTATCAGTTTGGCTTCGTGGTCCGGCAAGTTTTTGAATATGTTTTCATTATACGTAGGTACATATGTATATGCTATATGCTAATGGCGAAATGCGAAAAACAAGTTCAGAATTCGAGCTGCTGCTTATGCTTAAATTGGGTTTCGTT	chrX_9095326_9095574_+_dCP_twist_center88	twist	CCCAGCTGC	88	ETS	ACCGGAAGT	130	107	120	343	238	299	6.35834	4.5326	1.82573	2.59377	-1.93883	3.76456
chrX_9095326_9095574_+_dCP_twist_center88_to_SREBP	chrX_9095326_9095574	+	TCTCGCGCACACTCTAGCGCGCTGATTAAGAATTTTTATAGATGTATTTTGTTTTTTTCGTTTTTGTCATAATAGTTGAAGCCATCACGCGACGTTTGTTCATTATCAGTTTGGCTTCGTGGTCCGGCAAGTTTTTGAATATGTTTTCATTATACGTAGGTACATATGTATATGCTATATGCTAATGGCGAAATGCGAAAAACAAGTTCAGAATTCGAGCTGCTGCTTATGCTTAAATTGGGTTTCGTT	chrX_9095326_9095574_+_dCP_twist_center88	twist	CCCAGCTGCT	88	SREBP	ATCACGCGAC	128	125	148	340	245	313	6.21517	4.5326	1.68257	2.59377	-1.93883	3.6214
chrX_9095326_9095574_+_dCP_twist_center88_to_Stat92E	chrX_9095326_9095574	+	TCTCGCGCACACTCTAGCGCGCTGATTAAGAATTTTTATAGATGTATTTTGTTTTTTTCGTTTTTGTCATAATAGTTGAAGCTTTCCCGGAAAGTTTGTTCATTATCAGTTTGGCTTCGTGGTCCGGCAAGTTTTTGAATATGTTTTCATTATACGTAGGTACATATGTATATGCTATATGCTAATGGCGAAATGCGAAAAACAAGTTCAGAATTCGAGCTGCTGCTTATGCTTAAATTGGGTTTCGTT	chrX_9095326_9095574_+_dCP_twist_center88	twist	CCCCAGCTGCT	88	Stat92E	TTTCCCGGAAA	141	124	96	15	11	24	2.20443	4.5326	-2.32817	2.59377	-1.93883	-0.389341
chrX_9095326_9095574_+_dCP_twist_center88_to_Atf2	chrX_9095326_9095574	+	TCTCGCGCACACTCTAGCGCGCTGATTAAGAATTTTTATAGATGTATTTTGTTTTTTTCGTTTTTGTCATAATAGTTGAAGCATCACGTCATCGTTTGTTCATTATCAGTTTGGCTTCGTGGTCCGGCAAGTTTTTGAATATGTTTTCATTATACGTAGGTACATATGTATATGCTATATGCTAATGGCGAAATGCGAAAAACAAGTTCAGAATTCGAGCTGCTGCTTATGCTTAAATTGGGTTTCGTT	chrX_9095326_9095574_+_dCP_twist_center88	twist	CCCCAGCTGCT	88	Atf2	ATCACGTCATC	66	69	79	127	93	140	5.79892	4.5326	1.26632	2.59377	-1.93883	3.20515
chr2L_18573747_18573995_+_dCP_twist_center84_to_GATAA	chr2L_18573747_18573995	-	GACTAATCGCCCCGATTGCTGTGAGGTCGCTAATTGGTAGTTTCAACTGATATACCAGAGTGGCTATGAACACATCCCCAAGATAAGATGGGGCTGCTAAGTATCGGTATCTGATTGTTGGGCTATCTGGCGGATCGGCGTATCTGTGTATCCGTGCAAACAAACACAATTCCAACTAATCAAATCACGCGAGCGTTTCGGGGCTATCGAGTTGCGATTGCGGTTTCGGTTTAGAAAGATACTTTTTTT	chr2L_18573747_18573995_+_dCP_twist_center84	twist	CCATATGT	84	GATAA	AGATAAGA	232	201	186	39	29	41	2.55349	4.68382	-2.13033	2.38048	-2.30334	0.173015
chr2L_18573747_18573995_+_dCP_twist_center84_to_AP1	chr2L_18573747_18573995	-	GACTAATCGCCCCGATTGCTGTGAGGTCGCTAATTGGTAGTTTCAACTGATATACCAGAGTGGCTATGAACACATCCCCATGAGTCACTGGGGCTGCTAAGTATCGGTATCTGATTGTTGGGCTATCTGGCGGATCGGCGTATCTGTGTATCCGTGCAAACAAACACAATTCCAACTAATCAAATCACGCGAGCGTTTCGGGGCTATCGAGTTGCGATTGCGGTTTCGGTTTAGAAAGATACTTTTTTT	chr2L_18573747_18573995_+_dCP_twist_center84	twist	ACCATATGT	84	AP1	ATGAGTCAC	358	339	300	97	136	145	3.69053	4.68382	-0.993293	2.38048	-2.30334	1.31005
chr2L_18573747_18573995_+_dCP_twist_center84_to_Trl	chr2L_18573747_18573995	-	GACTAATCGCCCCGATTGCTGTGAGGTCGCTAATTGGTAGTTTCAACTGATATACCAGAGTGGCTATGAACACATCCCCAGAGAGAGTTGGGGCTGCTAAGTATCGGTATCTGATTGTTGGGCTATCTGGCGGATCGGCGTATCTGTGTATCCGTGCAAACAAACACAATTCCAACTAATCAAATCACGCGAGCGTTTCGGGGCTATCGAGTTGCGATTGCGGTTTCGGTTTAGAAAGATACTTTTTTT	chr2L_18573747_18573995_+_dCP_twist_center84	twist	CCATATG	84	Trl	GAGAGAG	374	330	329	40	18	48	1.75378	4.68382	-2.93004	2.38048	-2.30334	-0.626699
chr2L_18573747_18573995_+_dCP_twist_center84_to_ETS	chr2L_18573747_18573995	-	GACTAATCGCCCCGATTGCTGTGAGGTCGCTAATTGGTAGTTTCAACTGATATACCAGAGTGGCTATGAACACATCCCCACCGGAAGTTGGGGCTGCTAAGTATCGGTATCTGATTGTTGGGCTATCTGGCGGATCGGCGTATCTGTGTATCCGTGCAAACAAACACAATTCCAACTAATCAAATCACGCGAGCGTTTCGGGGCTATCGAGTTGCGATTGCGGTTTCGGTTTAGAAAGATACTTTTTTT	chr2L_18573747_18573995_+_dCP_twist_center84	twist	ACCATATGT	84	ETS	ACCGGAAGT	319	284	291	204	222	257	4.68898	4.68382	0.00515748	2.38048	-2.30334	2.3085
chr2L_18573747_18573995_+_dCP_twist_center84_to_SREBP	chr2L_18573747_18573995	-	GACTAATCGCCCCGATTGCTGTGAGGTCGCTAATTGGTAGTTTCAACTGATATACCAGAGTGGCTATGAACACATCCCCATCACGCGACGGGGCTGCTAAGTATCGGTATCTGATTGTTGGGCTATCTGGCGGATCGGCGTATCTGTGTATCCGTGCAAACAAACACAATTCCAACTAATCAAATCACGCGAGCGTTTCGGGGCTATCGAGTTGCGATTGCGGTTTCGGTTTAGAAAGATACTTTTTTT	chr2L_18573747_18573995_+_dCP_twist_center84	twist	ACCATATGTT	84	SREBP	ATCACGCGAC	297	255	273	94	131	143	3.92441	4.68382	-0.759409	2.38048	-2.30334	1.54393
chr2L_18573747_18573995_+_dCP_twist_center84_to_Stat92E	chr2L_18573747_18573995	-	GACTAATCGCCCCGATTGCTGTGAGGTCGCTAATTGGTAGTTTCAACTGATATACCAGAGTGGCTATGAACACATCCCTTTCCCGGAAAGGGGCTGCTAAGTATCGGTATCTGATTGTTGGGCTATCTGGCGGATCGGCGTATCTGTGTATCCGTGCAAACAAACACAATTCCAACTAATCAAATCACGCGAGCGTTTCGGGGCTATCGAGTTGCGATTGCGGTTTCGGTTTAGAAAGATACTTTTTTT	chr2L_18573747_18573995_+_dCP_twist_center84	twist	CACCATATGTT	84	Stat92E	TTTCCCGGAAA	240	194	197	41	41	39	2.69049	4.68382	-1.99333	2.38048	-2.30334	0.310012
chr2L_18573747_18573995_+_dCP_twist_center84_to_Atf2	chr2L_18573747_18573995	-	GACTAATCGCCCCGATTGCTGTGAGGTCGCTAATTGGTAGTTTCAACTGATATACCAGAGTGGCTATGAACACATCCCATCACGTCATCGGGGCTGCTAAGTATCGGTATCTGATTGTTGGGCTATCTGGCGGATCGGCGTATCTGTGTATCCGTGCAAACAAACACAATTCCAACTAATCAAATCACGCGAGCGTTTCGGGGCTATCGAGTTGCGATTGCGGTTTCGGTTTAGAAAGATACTTTTTTT	chr2L_18573747_18573995_+_dCP_twist_center84	twist	CACCATATGTT	84	Atf2	ATCACGTCATC	213	189	211	41	78	62	3.34843	4.68382	-1.33539	2.38048	-2.30334	0.967951
chr3R_22131380_22131628_+_dCP_twist_center147_to_GATAA	chr3R_22131380_22131628	+	TTCAATGTTTATAATAAAAGTGCGCGACTTGTCACACATTCAGGACGTAGCTCGTTTAGATTTTTTTCCATAGATTATGTTTTGATGGAACGCCAGCTGCAACAGCACCATCTGCCGCCGCCTGATGATGATTTCAGTGGCTGAGATAAGATGTCGAGCCGCAAAAGAGAAAAATATCAAAGTAGGATACAAAAAGTTGCGAAAATAGAAAAAACATCAAGCCAACGATGGGAACTGCTGACGGCGGGA	chr3R_22131380_22131628_+_dCP_twist_center147	twist	CCAGATGT	147	GATAA	AGATAAGA	93	73	80	23	25	23	3.27929	4.87713	-1.59783	3.10175	-1.77538	0.177549
chr3R_22131380_22131628_+_dCP_twist_center147_to_AP1	chr3R_22131380_22131628	+	TTCAATGTTTATAATAAAAGTGCGCGACTTGTCACACATTCAGGACGTAGCTCGTTTAGATTTTTTTCCATAGATTATGTTTTGATGGAACGCCAGCTGCAACAGCACCATCTGCCGCCGCCTGATGATGATTTCAGTGGCTATGAGTCACTGTCGAGCCGCAAAAGAGAAAAATATCAAAGTAGGATACAAAAAGTTGCGAAAATAGAAAAAACATCAAGCCAACGATGGGAACTGCTGACGGCGGGA	chr3R_22131380_22131628_+_dCP_twist_center147	twist	GCCAGATGT	147	AP1	ATGAGTCAC	19	12	15	6	7	15	4.34633	4.87713	-0.530794	3.10175	-1.77538	1.24459
chr3R_22131380_22131628_+_dCP_twist_center147_to_Trl	chr3R_22131380_22131628	+	TTCAATGTTTATAATAAAAGTGCGCGACTTGTCACACATTCAGGACGTAGCTCGTTTAGATTTTTTTCCATAGATTATGTTTTGATGGAACGCCAGCTGCAACAGCACCATCTGCCGCCGCCTGATGATGATTTCAGTGGCTGGAGAGAGTTGTCGAGCCGCAAAAGAGAAAAATATCAAAGTAGGATACAAAAAGTTGCGAAAATAGAAAAAACATCAAGCCAACGATGGGAACTGCTGACGGCGGGA	chr3R_22131380_22131628_+_dCP_twist_center147	twist	CCAGATG	147	Trl	GAGAGAG	37	45	27	2	1	6	1.45012	4.87713	-3.427	3.10175	-1.77538	-1.65162
chr3R_22131380_22131628_+_dCP_twist_center147_to_ETS	chr3R_22131380_22131628	+	TTCAATGTTTATAATAAAAGTGCGCGACTTGTCACACATTCAGGACGTAGCTCGTTTAGATTTTTTTCCATAGATTATGTTTTGATGGAACGCCAGCTGCAACAGCACCATCTGCCGCCGCCTGATGATGATTTCAGTGGCTACCGGAAGTTGTCGAGCCGCAAAAGAGAAAAATATCAAAGTAGGATACAAAAAGTTGCGAAAATAGAAAAAACATCAAGCCAACGATGGGAACTGCTGACGGCGGGA	chr3R_22131380_22131628_+_dCP_twist_center147	twist	GCCAGATGT	147	ETS	ACCGGAAGT	45	53	31	30	29	36	4.62194	4.87713	-0.255185	3.10175	-1.77538	1.5202
chr3R_22131380_22131628_+_dCP_twist_center147_to_SREBP	chr3R_22131380_22131628	+	TTCAATGTTTATAATAAAAGTGCGCGACTTGTCACACATTCAGGACGTAGCTCGTTTAGATTTTTTTCCATAGATTATGTTTTGATGGAACGCCAGCTGCAACAGCACCATCTGCCGCCGCCTGATGATGATTTCAGTGGCTATCACGCGACGTCGAGCCGCAAAAGAGAAAAATATCAAAGTAGGATACAAAAAGTTGCGAAAATAGAAAAAACATCAAGCCAACGATGGGAACTGCTGACGGCGGGA	chr3R_22131380_22131628_+_dCP_twist_center147	twist	GCCAGATGTT	147	SREBP	ATCACGCGAC	49	37	45	27	19	35	4.36125	4.87713	-0.515876	3.10175	-1.77538	1.25951
chr3R_22131380_22131628_+_dCP_twist_center147_to_Stat92E	chr3R_22131380_22131628	+	TTCAATGTTTATAATAAAAGTGCGCGACTTGTCACACATTCAGGACGTAGCTCGTTTAGATTTTTTTCCATAGATTATGTTTTGATGGAACGCCAGCTGCAACAGCACCATCTGCCGCCGCCTGATGATGATTTCAGTGGCTTTCCCGGAAAGTCGAGCCGCAAAAGAGAAAAATATCAAAGTAGGATACAAAAAGTTGCGAAAATAGAAAAAACATCAAGCCAACGATGGGAACTGCTGACGGCGGGA	chr3R_22131380_22131628_+_dCP_twist_center147	twist	TGCCAGATGTT	147	Stat92E	TTTCCCGGAAA	40	30	40	2	8	1	1.76213	4.87713	-3.115	3.10175	-1.77538	-1.33962
chr3R_22131380_22131628_+_dCP_twist_center147_to_Atf2	chr3R_22131380_22131628	+	TTCAATGTTTATAATAAAAGTGCGCGACTTGTCACACATTCAGGACGTAGCTCGTTTAGATTTTTTTCCATAGATTATGTTTTGATGGAACGCCAGCTGCAACAGCACCATCTGCCGCCGCCTGATGATGATTTCAGTGGCATCACGTCATCGTCGAGCCGCAAAAGAGAAAAATATCAAAGTAGGATACAAAAAGTTGCGAAAATAGAAAAAACATCAAGCCAACGATGGGAACTGCTGACGGCGGGA	chr3R_22131380_22131628_+_dCP_twist_center147	twist	TGCCAGATGTT	147	Atf2	ATCACGTCATC	28	24	30	16	14	17	4.25729	4.87713	-0.61984	3.10175	-1.77538	1.15554
chr3L_5181446_5181694_+_dCP_twist_center136_to_GATAA	chr3L_5181446_5181694	+	CGCCTTTTGGCATGTGAAAACAATATGTTGATTAAAAAGGATCGCCAATGCAAATGCCTCTTTGAGTATGTTTCAAGATAAATACCCGCACCACGAATAATGGAATTAGTGATATATGGGTATATCACATAAAGATAAGATGAAATATGTATATGAACTATTACCGATATCTTAGCATATATTGGGTTCTTTTGATATGCATAGGGGAACATTATGACAGCAGATAATGTTTTCAGTGGAACTGATCTC	chr3L_5181446_5181694_+_dCP_twist_center136	twist	ACATATGG	136	GATAA	AGATAAGA	20	17	15	3	2	1	1.94562	4.5147	-2.56908	2.2266	-2.28809	-0.280986
chr3L_5181446_5181694_+_dCP_twist_center136_to_AP1	chr3L_5181446_5181694	+	CGCCTTTTGGCATGTGAAAACAATATGTTGATTAAAAAGGATCGCCAATGCAAATGCCTCTTTGAGTATGTTTCAAGATAAATACCCGCACCACGAATAATGGAATTAGTGATATATGGGTATATCACATAATGAGTCACTGAAATATGTATATGAACTATTACCGATATCTTAGCATATATTGGGTTCTTTTGATATGCATAGGGGAACATTATGACAGCAGATAATGTTTTCAGTGGAACTGATCTC	chr3L_5181446_5181694_+_dCP_twist_center136	twist	AACATATGG	136	AP1	ATGAGTCAC	30	23	24	12	18	16	4.33388	4.5147	-0.18082	2.2266	-2.28809	2.10727
chr3L_5181446_5181694_+_dCP_twist_center136_to_Trl	chr3L_5181446_5181694	+	CGCCTTTTGGCATGTGAAAACAATATGTTGATTAAAAAGGATCGCCAATGCAAATGCCTCTTTGAGTATGTTTCAAGATAAATACCCGCACCACGAATAATGGAATTAGTGATATATGGGTATATCACATAAGAGAGAGGTGAAATATGTATATGAACTATTACCGATATCTTAGCATATATTGGGTTCTTTTGATATGCATAGGGGAACATTATGACAGCAGATAATGTTTTCAGTGGAACTGATCTC	chr3L_5181446_5181694_+_dCP_twist_center136	twist	ACATATG	136	Trl	GAGAGAG	63	62	38	3	2	1	0.297863	4.5147	-4.21683	2.2266	-2.28809	-1.92874
chr3L_5181446_5181694_+_dCP_twist_center136_to_ETS	chr3L_5181446_5181694	+	CGCCTTTTGGCATGTGAAAACAATATGTTGATTAAAAAGGATCGCCAATGCAAATGCCTCTTTGAGTATGTTTCAAGATAAATACCCGCACCACGAATAATGGAATTAGTGATATATGGGTATATCACATAACCGGAAGTTGAAATATGTATATGAACTATTACCGATATCTTAGCATATATTGGGTTCTTTTGATATGCATAGGGGAACATTATGACAGCAGATAATGTTTTCAGTGGAACTGATCTC	chr3L_5181446_5181694_+_dCP_twist_center136	twist	AACATATGG	136	ETS	ACCGGAAGT	29	20	27	32	13	30	5.02313	4.5147	0.508432	2.2266	-2.28809	2.79653
chr3L_5181446_5181694_+_dCP_twist_center136_to_SREBP	chr3L_5181446_5181694	+	CGCCTTTTGGCATGTGAAAACAATATGTTGATTAAAAAGGATCGCCAATGCAAATGCCTCTTTGAGTATGTTTCAAGATAAATACCCGCACCACGAATAATGGAATTAGTGATATATGGGTATATCACATAATCACGCGACGAAATATGTATATGAACTATTACCGATATCTTAGCATATATTGGGTTCTTTTGATATGCATAGGGGAACATTATGACAGCAGATAATGTTTTCAGTGGAACTGATCTC	chr3L_5181446_5181694_+_dCP_twist_center136	twist	AACATATGGT	136	SREBP	ATCACGCGAC	39	28	18	10	2	10	3.09967	4.5147	-1.41503	2.2266	-2.28809	0.873063
chr3L_5181446_5181694_+_dCP_twist_center136_to_Stat92E	chr3L_5181446_5181694	+	CGCCTTTTGGCATGTGAAAACAATATGTTGATTAAAAAGGATCGCCAATGCAAATGCCTCTTTGAGTATGTTTCAAGATAAATACCCGCACCACGAATAATGGAATTAGTGATATATGGGTATATCACATTTTCCCGGAAAGAAATATGTATATGAACTATTACCGATATCTTAGCATATATTGGGTTCTTTTGATATGCATAGGGGAACATTATGACAGCAGATAATGTTTTCAGTGGAACTGATCTC	chr3L_5181446_5181694_+_dCP_twist_center136	twist	AAACATATGGT	136	Stat92E	TTTCCCGGAAA	15	19	17	4	6	8	3.55623	4.5147	-0.958462	2.2266	-2.28809	1.32963
chr3L_5181446_5181694_+_dCP_twist_center136_to_Atf2	chr3L_5181446_5181694	+	CGCCTTTTGGCATGTGAAAACAATATGTTGATTAAAAAGGATCGCCAATGCAAATGCCTCTTTGAGTATGTTTCAAGATAAATACCCGCACCACGAATAATGGAATTAGTGATATATGGGTATATCACATATCACGTCATCGAAATATGTATATGAACTATTACCGATATCTTAGCATATATTGGGTTCTTTTGATATGCATAGGGGAACATTATGACAGCAGATAATGTTTTCAGTGGAACTGATCTC	chr3L_5181446_5181694_+_dCP_twist_center136	twist	AAACATATGGT	136	Atf2	ATCACGTCATC	27	31	31	5	4	3	2.1643	4.5147	-2.35039	2.2266	-2.28809	-0.0622995
chr3R_16882687_16882935_+_dCP_twist_center137_to_GATAA	chr3R_16882687_16882935	+	ACTTGTTACTCGTAGAAAAATCCCCTCGAGGCACCCCCACTTTTTTCCATTGTAATTATCTCCAAAAACCACCATCGGTAATTGTACAATTCTGCATTGTATAATCTAATTGATAAGACTGGCATTACACATCAGATAAGAAATTGTTAGTCATGTCCGGCAGCATCATGTGCCTGGCAAACAAAAGATGAAGTATCCAGCACCCACGCTCAGAACCCCATTTAGTGTGCGAGTGAAGCTTATCTAATC	chr3R_16882687_16882935_+_dCP_twist_center137	twist	CCATCTGG	137	GATAA	AGATAAGA	71	56	51	12	9	13	2.67371	7.62106	-4.94735	4.65356	-2.9675	-1.97985
chr3R_16882687_16882935_+_dCP_twist_center137_to_AP1	chr3R_16882687_16882935	+	ACTTGTTACTCGTAGAAAAATCCCCTCGAGGCACCCCCACTTTTTTCCATTGTAATTATCTCCAAAAACCACCATCGGTAATTGTACAATTCTGCATTGTATAATCTAATTGATAAGACTGGCATTACACATATGAGTCACAATTGTTAGTCATGTCCGGCAGCATCATGTGCCTGGCAAACAAAAGATGAAGTATCCAGCACCCACGCTCAGAACCCCATTTAGTGTGCGAGTGAAGCTTATCTAATC	chr3R_16882687_16882935_+_dCP_twist_center137	twist	CCCATCTGG	137	AP1	ATGAGTCAC	74	75	75	143	106	138	5.84363	7.62106	-1.77743	4.65356	-2.9675	1.19007
chr3R_16882687_16882935_+_dCP_twist_center137_to_Trl	chr3R_16882687_16882935	+	ACTTGTTACTCGTAGAAAAATCCCCTCGAGGCACCCCCACTTTTTTCCATTGTAATTATCTCCAAAAACCACCATCGGTAATTGTACAATTCTGCATTGTATAATCTAATTGATAAGACTGGCATTACACATCGAGAGAGGAATTGTTAGTCATGTCCGGCAGCATCATGTGCCTGGCAAACAAAAGATGAAGTATCCAGCACCCACGCTCAGAACCCCATTTAGTGTGCGAGTGAAGCTTATCTAATC	chr3R_16882687_16882935_+_dCP_twist_center137	twist	CCATCTG	137	Trl	GAGAGAG	39	40	51	87	86	92	6.09519	7.62106	-1.52587	4.65356	-2.9675	1.44163
chr3R_16882687_16882935_+_dCP_twist_center137_to_ETS	chr3R_16882687_16882935	+	ACTTGTTACTCGTAGAAAAATCCCCTCGAGGCACCCCCACTTTTTTCCATTGTAATTATCTCCAAAAACCACCATCGGTAATTGTACAATTCTGCATTGTATAATCTAATTGATAAGACTGGCATTACACATACCGGAAGTAATTGTTAGTCATGTCCGGCAGCATCATGTGCCTGGCAAACAAAAGATGAAGTATCCAGCACCCACGCTCAGAACCCCATTTAGTGTGCGAGTGAAGCTTATCTAATC	chr3R_16882687_16882935_+_dCP_twist_center137	twist	CCCATCTGG	137	ETS	ACCGGAAGT	62	63	49	610	643	722	8.5838	7.62106	0.962733	4.65356	-2.9675	3.93023
chr3R_16882687_16882935_+_dCP_twist_center137_to_SREBP	chr3R_16882687_16882935	+	ACTTGTTACTCGTAGAAAAATCCCCTCGAGGCACCCCCACTTTTTTCCATTGTAATTATCTCCAAAAACCACCATCGGTAATTGTACAATTCTGCATTGTATAATCTAATTGATAAGACTGGCATTACACATATCACGCGACATTGTTAGTCATGTCCGGCAGCATCATGTGCCTGGCAAACAAAAGATGAAGTATCCAGCACCCACGCTCAGAACCCCATTTAGTGTGCGAGTGAAGCTTATCTAATC	chr3R_16882687_16882935_+_dCP_twist_center137	twist	CCCATCTGGA	137	SREBP	ATCACGCGAC	79	72	59	257	248	297	7.00672	7.62106	-0.614342	4.65356	-2.9675	2.35316
chr3R_16882687_16882935_+_dCP_twist_center137_to_Stat92E	chr3R_16882687_16882935	+	ACTTGTTACTCGTAGAAAAATCCCCTCGAGGCACCCCCACTTTTTTCCATTGTAATTATCTCCAAAAACCACCATCGGTAATTGTACAATTCTGCATTGTATAATCTAATTGATAAGACTGGCATTACACATTTCCCGGAAAATTGTTAGTCATGTCCGGCAGCATCATGTGCCTGGCAAACAAAAGATGAAGTATCCAGCACCCACGCTCAGAACCCCATTTAGTGTGCGAGTGAAGCTTATCTAATC	chr3R_16882687_16882935_+_dCP_twist_center137	twist	TCCCATCTGGA	137	Stat92E	TTTCCCGGAAA	179	129	149	830	771	891	7.52478	7.62106	-0.0962862	4.65356	-2.9675	2.87121
chr3R_16882687_16882935_+_dCP_twist_center137_to_Atf2	chr3R_16882687_16882935	+	ACTTGTTACTCGTAGAAAAATCCCCTCGAGGCACCCCCACTTTTTTCCATTGTAATTATCTCCAAAAACCACCATCGGTAATTGTACAATTCTGCATTGTATAATCTAATTGATAAGACTGGCATTACACAATCACGTCATCATTGTTAGTCATGTCCGGCAGCATCATGTGCCTGGCAAACAAAAGATGAAGTATCCAGCACCCACGCTCAGAACCCCATTTAGTGTGCGAGTGAAGCTTATCTAATC	chr3R_16882687_16882935_+_dCP_twist_center137	twist	TCCCATCTGGA	137	Atf2	ATCACGTCATC	63	60	74	44	39	54	4.53342	7.62106	-3.08764	4.65356	-2.9675	-0.120145
chr2R_14581535_14581783_+_dCP_twist_center39_to_GATAA	chr2R_14581535_14581783	-	GATAAGTGGCCACCATTGGACCTTGAAGTTGTCGAAGATAAGAGCGCTCTTATCAGGGGTAACAAAATTTCGTTACAGTCAACAAACAATTCGCCAGATCGAGGGAAGCTGATTCGATTTGTTTATCTATCTGCTTTGATGTGCCACACTGACCGACTGTTTCGAGAAATATGGCATACTATAGTCGCACTGAGCGATAATTTGACATTCAAAGTTATATATACCATTAGTGAGTACCACAATTGTTAG	chr2R_14581535_14581783_+_dCP_twist_center39	twist	ACAGCTGT	39	GATAA	AGATAAGA	48	38	46	28	45	45	4.92686	5.54896	-0.622096	2.94679	-2.60217	1.98008
chr2R_14581535_14581783_+_dCP_twist_center39_to_AP1	chr2R_14581535_14581783	-	GATAAGTGGCCACCATTGGACCTTGAAGTTGTCGATGAGTCACGCGCTCTTATCAGGGGTAACAAAATTTCGTTACAGTCAACAAACAATTCGCCAGATCGAGGGAAGCTGATTCGATTTGTTTATCTATCTGCTTTGATGTGCCACACTGACCGACTGTTTCGAGAAATATGGCATACTATAGTCGCACTGAGCGATAATTTGACATTCAAAGTTATATATACCATTAGTGAGTACCACAATTGTTAG	chr2R_14581535_14581783_+_dCP_twist_center39	twist	AACAGCTGT	39	AP1	ATGAGTCAC	56	48	44	107	112	108	6.2248	5.54896	0.675842	2.94679	-2.60217	3.27801
chr2R_14581535_14581783_+_dCP_twist_center39_to_Trl	chr2R_14581535_14581783	-	GATAAGTGGCCACCATTGGACCTTGAAGTTGTCGAGAGAGAGTGCGCTCTTATCAGGGGTAACAAAATTTCGTTACAGTCAACAAACAATTCGCCAGATCGAGGGAAGCTGATTCGATTTGTTTATCTATCTGCTTTGATGTGCCACACTGACCGACTGTTTCGAGAAATATGGCATACTATAGTCGCACTGAGCGATAATTTGACATTCAAAGTTATATATACCATTAGTGAGTACCACAATTGTTAG	chr2R_14581535_14581783_+_dCP_twist_center39	twist	ACAGCTG	39	Trl	GAGAGAG	58	46	50	19	10	10	3.07536	5.54896	-2.4736	2.94679	-2.60217	0.128574
chr2R_14581535_14581783_+_dCP_twist_center39_to_ETS	chr2R_14581535_14581783	-	GATAAGTGGCCACCATTGGACCTTGAAGTTGTCGACCGGAAGTGCGCTCTTATCAGGGGTAACAAAATTTCGTTACAGTCAACAAACAATTCGCCAGATCGAGGGAAGCTGATTCGATTTGTTTATCTATCTGCTTTGATGTGCCACACTGACCGACTGTTTCGAGAAATATGGCATACTATAGTCGCACTGAGCGATAATTTGACATTCAAAGTTATATATACCATTAGTGAGTACCACAATTGTTAG	chr2R_14581535_14581783_+_dCP_twist_center39	twist	AACAGCTGT	39	ETS	ACCGGAAGT	60	46	57	341	290	327	7.62468	5.54896	2.07573	2.94679	-2.60217	4.6779
chr2R_14581535_14581783_+_dCP_twist_center39_to_SREBP	chr2R_14581535_14581783	-	GATAAGTGGCCACCATTGGACCTTGAAGTTGTCGATCACGCGACCGCTCTTATCAGGGGTAACAAAATTTCGTTACAGTCAACAAACAATTCGCCAGATCGAGGGAAGCTGATTCGATTTGTTTATCTATCTGCTTTGATGTGCCACACTGACCGACTGTTTCGAGAAATATGGCATACTATAGTCGCACTGAGCGATAATTTGACATTCAAAGTTATATATACCATTAGTGAGTACCACAATTGTTAG	chr2R_14581535_14581783_+_dCP_twist_center39	twist	AACAGCTGTG	39	SREBP	ATCACGCGAC	42	37	49	360	290	394	8.08606	5.54896	2.5371	2.94679	-2.60217	5.13927
chr2R_14581535_14581783_+_dCP_twist_center39_to_Stat92E	chr2R_14581535_14581783	-	GATAAGTGGCCACCATTGGACCTTGAAGTTGTCTTTCCCGGAAACGCTCTTATCAGGGGTAACAAAATTTCGTTACAGTCAACAAACAATTCGCCAGATCGAGGGAAGCTGATTCGATTTGTTTATCTATCTGCTTTGATGTGCCACACTGACCGACTGTTTCGAGAAATATGGCATACTATAGTCGCACTGAGCGATAATTTGACATTCAAAGTTATATATACCATTAGTGAGTACCACAATTGTTAG	chr2R_14581535_14581783_+_dCP_twist_center39	twist	GAACAGCTGTG	39	Stat92E	TTTCCCGGAAA	134	86	115	729	603	763	7.71482	5.54896	2.16586	2.94679	-2.60217	4.76804
chr2R_14581535_14581783_+_dCP_twist_center39_to_Atf2	chr2R_14581535_14581783	-	GATAAGTGGCCACCATTGGACCTTGAAGTTGTCATCACGTCATCCGCTCTTATCAGGGGTAACAAAATTTCGTTACAGTCAACAAACAATTCGCCAGATCGAGGGAAGCTGATTCGATTTGTTTATCTATCTGCTTTGATGTGCCACACTGACCGACTGTTTCGAGAAATATGGCATACTATAGTCGCACTGAGCGATAATTTGACATTCAAAGTTATATATACCATTAGTGAGTACCACAATTGTTAG	chr2R_14581535_14581783_+_dCP_twist_center39	twist	GAACAGCTGTG	39	Atf2	ATCACGTCATC	67	56	60	365	283	356	7.5175	5.54896	1.96854	2.94679	-2.60217	4.57071
chr2L_14219614_14219862_+_dCP_twist_center137_to_GATAA	chr2L_14219614_14219862	-	CTGTAGAAGGAAAGAAAGAAAGAATAGCCCCGCATTTCTAGCTCTATCTCACTTGCTCGCACTTAAATTTATTATCATGTAAAACTTTTGTGCAACAATGTGAATAACAAAAGCTGAAAATCGCTGCTACTGTAGATAAGATGTTCAGCCTCCCCTCGCTTCCAGTTCTCCGCCCCGGCAATTGTTCTAGTTGATAATTTATTTGAATATTTGGCATAATTATTCCGGTGTGAGCAACAACAAGAAACA	chr2L_14219614_14219862_+_dCP_twist_center137	twist	GCAGCTGT	137	GATAA	AGATAAGA	29	39	43	19	14	8	3.61725	3.90329	-0.286039	1.43885	-2.46444	2.1784
chr2L_14219614_14219862_+_dCP_twist_center137_to_AP1	chr2L_14219614_14219862	-	CTGTAGAAGGAAAGAAAGAAAGAATAGCCCCGCATTTCTAGCTCTATCTCACTTGCTCGCACTTAAATTTATTATCATGTAAAACTTTTGTGCAACAATGTGAATAACAAAAGCTGAAAATCGCTGCTACTGATGAGTCACTGTTCAGCCTCCCCTCGCTTCCAGTTCTCCGCCCCGGCAATTGTTCTAGTTGATAATTTATTTGAATATTTGGCATAATTATTCCGGTGTGAGCAACAACAAGAAACA	chr2L_14219614_14219862_+_dCP_twist_center137	twist	TGCAGCTGT	137	AP1	ATGAGTCAC	54	43	51	23	28	30	4.20283	3.90329	0.299546	1.43885	-2.46444	2.76398
chr2L_14219614_14219862_+_dCP_twist_center137_to_Trl	chr2L_14219614_14219862	-	CTGTAGAAGGAAAGAAAGAAAGAATAGCCCCGCATTTCTAGCTCTATCTCACTTGCTCGCACTTAAATTTATTATCATGTAAAACTTTTGTGCAACAATGTGAATAACAAAAGCTGAAAATCGCTGCTACTGTGAGAGAGTTGTTCAGCCTCCCCTCGCTTCCAGTTCTCCGCCCCGGCAATTGTTCTAGTTGATAATTTATTTGAATATTTGGCATAATTATTCCGGTGTGAGCAACAACAAGAAACA	chr2L_14219614_14219862_+_dCP_twist_center137	twist	GCAGCTG	137	Trl	GAGAGAG	46	56	52	2	5	10	1.87493	3.90329	-2.02835	1.43885	-2.46444	0.436086
chr2L_14219614_14219862_+_dCP_twist_center137_to_ETS	chr2L_14219614_14219862	-	CTGTAGAAGGAAAGAAAGAAAGAATAGCCCCGCATTTCTAGCTCTATCTCACTTGCTCGCACTTAAATTTATTATCATGTAAAACTTTTGTGCAACAATGTGAATAACAAAAGCTGAAAATCGCTGCTACTGACCGGAAGTTGTTCAGCCTCCCCTCGCTTCCAGTTCTCCGCCCCGGCAATTGTTCTAGTTGATAATTTATTTGAATATTTGGCATAATTATTCCGGTGTGAGCAACAACAAGAAACA	chr2L_14219614_14219862_+_dCP_twist_center137	twist	TGCAGCTGT	137	ETS	ACCGGAAGT	130	135	121	207	181	206	5.68667	3.90329	1.78338	1.43885	-2.46444	4.24782
chr2L_14219614_14219862_+_dCP_twist_center137_to_SREBP	chr2L_14219614_14219862	-	CTGTAGAAGGAAAGAAAGAAAGAATAGCCCCGCATTTCTAGCTCTATCTCACTTGCTCGCACTTAAATTTATTATCATGTAAAACTTTTGTGCAACAATGTGAATAACAAAAGCTGAAAATCGCTGCTACTGATCACGCGACGTTCAGCCTCCCCTCGCTTCCAGTTCTCCGCCCCGGCAATTGTTCTAGTTGATAATTTATTTGAATATTTGGCATAATTATTCCGGTGTGAGCAACAACAAGAAACA	chr2L_14219614_14219862_+_dCP_twist_center137	twist	TGCAGCTGTT	137	SREBP	ATCACGCGAC	93	92	86	116	127	172	5.6841	3.90329	1.78082	1.43885	-2.46444	4.24525
chr2L_14219614_14219862_+_dCP_twist_center137_to_Stat92E	chr2L_14219614_14219862	-	CTGTAGAAGGAAAGAAAGAAAGAATAGCCCCGCATTTCTAGCTCTATCTCACTTGCTCGCACTTAAATTTATTATCATGTAAAACTTTTGTGCAACAATGTGAATAACAAAAGCTGAAAATCGCTGCTACTTTTCCCGGAAAGTTCAGCCTCCCCTCGCTTCCAGTTCTCCGCCCCGGCAATTGTTCTAGTTGATAATTTATTTGAATATTTGGCATAATTATTCCGGTGTGAGCAACAACAAGAAACA	chr2L_14219614_14219862_+_dCP_twist_center137	twist	GTGCAGCTGTT	137	Stat92E	TTTCCCGGAAA	98	80	82	0	7	9	1.13646	3.90329	-2.76683	1.43885	-2.46444	-0.302389
chr2L_14219614_14219862_+_dCP_twist_center137_to_Atf2	chr2L_14219614_14219862	-	CTGTAGAAGGAAAGAAAGAAAGAATAGCCCCGCATTTCTAGCTCTATCTCACTTGCTCGCACTTAAATTTATTATCATGTAAAACTTTTGTGCAACAATGTGAATAACAAAAGCTGAAAATCGCTGCTACTATCACGTCATCGTTCAGCCTCCCCTCGCTTCCAGTTCTCCGCCCCGGCAATTGTTCTAGTTGATAATTTATTTGAATATTTGGCATAATTATTCCGGTGTGAGCAACAACAAGAAACA	chr2L_14219614_14219862_+_dCP_twist_center137	twist	GTGCAGCTGTT	137	Atf2	ATCACGTCATC	77	98	66	20	10	15	2.62195	3.90329	-1.28134	1.43885	-2.46444	1.1831
chr3R_5342860_5343108_+_dCP_twist_center170_to_GATAA	chr3R_5342860_5343108	+	GCCAATCGGTTGATTATCATGTTCTTAATGAAAGTAGCAACAAATAGCTGAATTTTCGCTTGCCCAAACTTACTCAGCGATGTTTTAGAGGGGACCCTCATCACTACTCCTACAGTTTTTAGTTTGCGACGCCCATTGGTGATAAATACTTGTGTACATACATACAAGATAAGATTATTTTTATGGAATGTGTTTATCTGGAACCCTCTCTATATGCGTCAACACATAATTGCACATGTTTAAATTTCC	chr3R_5342860_5343108_+_dCP_twist_center170	twist	ACATGTGA	170	GATAA	AGATAAGA	66	63	62	108	89	120	5.79025	8.18873	-2.39848	5.32259	-2.86614	0.467659
chr3R_5342860_5343108_+_dCP_twist_center170_to_AP1	chr3R_5342860_5343108	+	GCCAATCGGTTGATTATCATGTTCTTAATGAAAGTAGCAACAAATAGCTGAATTTTCGCTTGCCCAAACTTACTCAGCGATGTTTTAGAGGGGACCCTCATCACTACTCCTACAGTTTTTAGTTTGCGACGCCCATTGGTGATAAATACTTGTGTACATACATACATGAGTCACTTATTTTTATGGAATGTGTTTATCTGGAACCCTCTCTATATGCGTCAACACATAATTGCACATGTTTAAATTTCC	chr3R_5342860_5343108_+_dCP_twist_center170	twist	AACATGTGA	170	AP1	ATGAGTCAC	42	53	58	536	536	675	8.57662	8.18873	0.387887	5.32259	-2.86614	3.25403
chr3R_5342860_5343108_+_dCP_twist_center170_to_Trl	chr3R_5342860_5343108	+	GCCAATCGGTTGATTATCATGTTCTTAATGAAAGTAGCAACAAATAGCTGAATTTTCGCTTGCCCAAACTTACTCAGCGATGTTTTAGAGGGGACCCTCATCACTACTCCTACAGTTTTTAGTTTGCGACGCCCATTGGTGATAAATACTTGTGTACATACATACAGAGAGAGATTATTTTTATGGAATGTGTTTATCTGGAACCCTCTCTATATGCGTCAACACATAATTGCACATGTTTAAATTTCC	chr3R_5342860_5343108_+_dCP_twist_center170	twist	ACATGTG	170	Trl	GAGAGAG	150	123	129	902	841	1050	7.86877	8.18873	-0.319961	5.32259	-2.86614	2.54618
chr3R_5342860_5343108_+_dCP_twist_center170_to_ETS	chr3R_5342860_5343108	+	GCCAATCGGTTGATTATCATGTTCTTAATGAAAGTAGCAACAAATAGCTGAATTTTCGCTTGCCCAAACTTACTCAGCGATGTTTTAGAGGGGACCCTCATCACTACTCCTACAGTTTTTAGTTTGCGACGCCCATTGGTGATAAATACTTGTGTACATACATACACCGGAAGTTTATTTTTATGGAATGTGTTTATCTGGAACCCTCTCTATATGCGTCAACACATAATTGCACATGTTTAAATTTCC	chr3R_5342860_5343108_+_dCP_twist_center170	twist	AACATGTGA	170	ETS	ACCGGAAGT	92	89	88	1891	1857	2244	9.54949	8.18873	1.36076	5.32259	-2.86614	4.2269
chr3R_5342860_5343108_+_dCP_twist_center170_to_SREBP	chr3R_5342860_5343108	+	GCCAATCGGTTGATTATCATGTTCTTAATGAAAGTAGCAACAAATAGCTGAATTTTCGCTTGCCCAAACTTACTCAGCGATGTTTTAGAGGGGACCCTCATCACTACTCCTACAGTTTTTAGTTTGCGACGCCCATTGGTGATAAATACTTGTGTACATACATACATCACGCGACTATTTTTATGGAATGTGTTTATCTGGAACCCTCTCTATATGCGTCAACACATAATTGCACATGTTTAAATTTCC	chr3R_5342860_5343108_+_dCP_twist_center170	twist	AACATGTGAT	170	SREBP	ATCACGCGAC	76	69	66	747	964	1162	8.85402	8.18873	0.665288	5.32259	-2.86614	3.53143
chr3R_5342860_5343108_+_dCP_twist_center170_to_Stat92E	chr3R_5342860_5343108	+	GCCAATCGGTTGATTATCATGTTCTTAATGAAAGTAGCAACAAATAGCTGAATTTTCGCTTGCCCAAACTTACTCAGCGATGTTTTAGAGGGGACCCTCATCACTACTCCTACAGTTTTTAGTTTGCGACGCCCATTGGTGATAAATACTTGTGTACATACATATTTCCCGGAAATATTTTTATGGAATGTGTTTATCTGGAACCCTCTCTATATGCGTCAACACATAATTGCACATGTTTAAATTTCC	chr3R_5342860_5343108_+_dCP_twist_center170	twist	CAACATGTGAT	170	Stat92E	TTTCCCGGAAA	75	54	58	963	1052	1103	9.14981	8.18873	0.961087	5.32259	-2.86614	3.82723
chr3R_5342860_5343108_+_dCP_twist_center170_to_Atf2	chr3R_5342860_5343108	+	GCCAATCGGTTGATTATCATGTTCTTAATGAAAGTAGCAACAAATAGCTGAATTTTCGCTTGCCCAAACTTACTCAGCGATGTTTTAGAGGGGACCCTCATCACTACTCCTACAGTTTTTAGTTTGCGACGCCCATTGGTGATAAATACTTGTGTACATACATAATCACGTCATCTATTTTTATGGAATGTGTTTATCTGGAACCCTCTCTATATGCGTCAACACATAATTGCACATGTTTAAATTTCC	chr3R_5342860_5343108_+_dCP_twist_center170	twist	CAACATGTGAT	170	Atf2	ATCACGTCATC	67	51	58	187	224	298	7.09089	8.18873	-1.09784	5.32259	-2.86614	1.76831
chrX_8762725_8762973_+_dCP_twist_center40_to_GATAA	chrX_8762725_8762973	+	CACTTAGTCACTCCATTAGACACACATTCAACCGAAAGATAAGACGAGCGATCGCGATAATCGCACCGCTGGGGATGTGGATGTGGATGTGGATGTGGATGCGAATGATGATGATGATGATAGTGGGGGACTCGCTGTTGGACTCCCAGCATGGTCCCAGTTCCCAAAGTAATTGCATGGGCAATCTTCACCGACTGCCGCATTCCCATCACACGACAGCCCAGCGATTCGCCATCGCCCACACTGAAC	chrX_8762725_8762973_+_dCP_twist_center40	twist	ACACATGA	40	GATAA	AGATAAGA	252	209	253	320	305	348	5.51914	5.38172	0.13742	2.56634	-2.81538	2.9528
chrX_8762725_8762973_+_dCP_twist_center40_to_AP1	chrX_8762725_8762973	+	CACTTAGTCACTCCATTAGACACACATTCAACCGAATGAGTCACCGAGCGATCGCGATAATCGCACCGCTGGGGATGTGGATGTGGATGTGGATGTGGATGCGAATGATGATGATGATGATAGTGGGGGACTCGCTGTTGGACTCCCAGCATGGTCCCAGTTCCCAAAGTAATTGCATGGGCAATCTTCACCGACTGCCGCATTCCCATCACACGACAGCCCAGCGATTCGCCATCGCCCACACTGAAC	chrX_8762725_8762973_+_dCP_twist_center40	twist	AACACATGA	40	AP1	ATGAGTCAC	160	140	119	300	334	402	6.38777	5.38172	1.00605	2.56634	-2.81538	3.82143
chrX_8762725_8762973_+_dCP_twist_center40_to_Trl	chrX_8762725_8762973	+	CACTTAGTCACTCCATTAGACACACATTCAACCGAAGAGAGAGACGAGCGATCGCGATAATCGCACCGCTGGGGATGTGGATGTGGATGTGGATGTGGATGCGAATGATGATGATGATGATAGTGGGGGACTCGCTGTTGGACTCCCAGCATGGTCCCAGTTCCCAAAGTAATTGCATGGGCAATCTTCACCGACTGCCGCATTCCCATCACACGACAGCCCAGCGATTCGCCATCGCCCACACTGAAC	chrX_8762725_8762973_+_dCP_twist_center40	twist	ACACATG	40	Trl	GAGAGAG	267	243	259	119	111	150	4.0463	5.38172	-1.33542	2.56634	-2.81538	1.47996
chrX_8762725_8762973_+_dCP_twist_center40_to_ETS	chrX_8762725_8762973	+	CACTTAGTCACTCCATTAGACACACATTCAACCGAACCGGAAGTCGAGCGATCGCGATAATCGCACCGCTGGGGATGTGGATGTGGATGTGGATGTGGATGCGAATGATGATGATGATGATAGTGGGGGACTCGCTGTTGGACTCCCAGCATGGTCCCAGTTCCCAAAGTAATTGCATGGGCAATCTTCACCGACTGCCGCATTCCCATCACACGACAGCCCAGCGATTCGCCATCGCCCACACTGAAC	chrX_8762725_8762973_+_dCP_twist_center40	twist	AACACATGA	40	ETS	ACCGGAAGT	89	91	102	301	298	349	6.81791	5.38172	1.43619	2.56634	-2.81538	4.25158
chrX_8762725_8762973_+_dCP_twist_center40_to_SREBP	chrX_8762725_8762973	+	CACTTAGTCACTCCATTAGACACACATTCAACCGAATCACGCGACGAGCGATCGCGATAATCGCACCGCTGGGGATGTGGATGTGGATGTGGATGTGGATGCGAATGATGATGATGATGATAGTGGGGGACTCGCTGTTGGACTCCCAGCATGGTCCCAGTTCCCAAAGTAATTGCATGGGCAATCTTCACCGACTGCCGCATTCCCATCACACGACAGCCCAGCGATTCGCCATCGCCCACACTGAAC	chrX_8762725_8762973_+_dCP_twist_center40	twist	AACACATGAC	40	SREBP	ATCACGCGAC	195	150	162	449	489	633	6.71137	5.38172	1.32965	2.56634	-2.81538	4.14503
chrX_8762725_8762973_+_dCP_twist_center40_to_Stat92E	chrX_8762725_8762973	+	CACTTAGTCACTCCATTAGACACACATTCAACCGTTTCCCGGAAAGAGCGATCGCGATAATCGCACCGCTGGGGATGTGGATGTGGATGTGGATGTGGATGCGAATGATGATGATGATGATAGTGGGGGACTCGCTGTTGGACTCCCAGCATGGTCCCAGTTCCCAAAGTAATTGCATGGGCAATCTTCACCGACTGCCGCATTCCCATCACACGACAGCCCAGCGATTCGCCATCGCCCACACTGAAC	chrX_8762725_8762973_+_dCP_twist_center40	twist	AAACACATGAC	40	Stat92E	TTTCCCGGAAA	152	103	122	406	408	471	6.85186	5.38172	1.47014	2.56634	-2.81538	4.28552
chrX_8762725_8762973_+_dCP_twist_center40_to_Atf2	chrX_8762725_8762973	+	CACTTAGTCACTCCATTAGACACACATTCAACCGATCACGTCATCGAGCGATCGCGATAATCGCACCGCTGGGGATGTGGATGTGGATGTGGATGTGGATGCGAATGATGATGATGATGATAGTGGGGGACTCGCTGTTGGACTCCCAGCATGGTCCCAGTTCCCAAAGTAATTGCATGGGCAATCTTCACCGACTGCCGCATTCCCATCACACGACAGCCCAGCGATTCGCCATCGCCCACACTGAAC	chrX_8762725_8762973_+_dCP_twist_center40	twist	AAACACATGAC	40	Atf2	ATCACGTCATC	203	154	166	239	269	309	5.72866	5.38172	0.346938	2.56634	-2.81538	3.16232
chr3R_689606_689854_+_dCP_twist_center76_to_GATAA	chr3R_689606_689854	-	AACGAGTGCGAAAGAAAGGGAGGGAGCTGGGATCTCGGGCCAGAGAATCCGAGGGATGAGCATCATCATCGCAGATAAGACAACAGCATGCAATGCGATATGATTATTATTATCTAACAATACAATAACAAAACTGCTACTTTTTGCCTGCCGGTCTCTCCATCCCTGTCTTCCCAGCACCTCCGCTTGGGTTGTTGACACTCTTCGGATTTGAGAATCCTGAGCCCATTGTGTATCTGTATGTATATC	chr3R_689606_689854_+_dCP_twist_center76	twist	TCATGTGT	76	GATAA	AGATAAGA	145	144	139	9	13	21	1.74542	4.75812	-3.0127	2.33306	-2.42507	-0.587639
chr3R_689606_689854_+_dCP_twist_center76_to_AP1	chr3R_689606_689854	-	AACGAGTGCGAAAGAAAGGGAGGGAGCTGGGATCTCGGGCCAGAGAATCCGAGGGATGAGCATCATCATCGATGAGTCACCAACAGCATGCAATGCGATATGATTATTATTATCTAACAATACAATAACAAAACTGCTACTTTTTGCCTGCCGGTCTCTCCATCCCTGTCTTCCCAGCACCTCCGCTTGGGTTGTTGACACTCTTCGGATTTGAGAATCCTGAGCCCATTGTGTATCTGTATGTATATC	chr3R_689606_689854_+_dCP_twist_center76	twist	CTCATGTGT	76	AP1	ATGAGTCAC	58	54	68	37	46	37	4.49483	4.75812	-0.263296	2.33306	-2.42507	2.16177
chr3R_689606_689854_+_dCP_twist_center76_to_Trl	chr3R_689606_689854	-	AACGAGTGCGAAAGAAAGGGAGGGAGCTGGGATCTCGGGCCAGAGAATCCGAGGGATGAGCATCATCATCGCGAGAGAGTCAACAGCATGCAATGCGATATGATTATTATTATCTAACAATACAATAACAAAACTGCTACTTTTTGCCTGCCGGTCTCTCCATCCCTGTCTTCCCAGCACCTCCGCTTGGGTTGTTGACACTCTTCGGATTTGAGAATCCTGAGCCCATTGTGTATCTGTATGTATATC	chr3R_689606_689854_+_dCP_twist_center76	twist	TCATGTG	76	Trl	GAGAGAG	85	82	85	17	18	26	3.01317	4.75812	-1.74495	2.33306	-2.42507	0.680116
chr3R_689606_689854_+_dCP_twist_center76_to_ETS	chr3R_689606_689854	-	AACGAGTGCGAAAGAAAGGGAGGGAGCTGGGATCTCGGGCCAGAGAATCCGAGGGATGAGCATCATCATCGACCGGAAGTCAACAGCATGCAATGCGATATGATTATTATTATCTAACAATACAATAACAAAACTGCTACTTTTTGCCTGCCGGTCTCTCCATCCCTGTCTTCCCAGCACCTCCGCTTGGGTTGTTGACACTCTTCGGATTTGAGAATCCTGAGCCCATTGTGTATCTGTATGTATATC	chr3R_689606_689854_+_dCP_twist_center76	twist	CTCATGTGT	76	ETS	ACCGGAAGT	201	150	176	314	310	383	6.01016	4.75812	1.25204	2.33306	-2.42507	3.6771
chr3R_689606_689854_+_dCP_twist_center76_to_SREBP	chr3R_689606_689854	-	AACGAGTGCGAAAGAAAGGGAGGGAGCTGGGATCTCGGGCCAGAGAATCCGAGGGATGAGCATCATCATCGATCACGCGACAACAGCATGCAATGCGATATGATTATTATTATCTAACAATACAATAACAAAACTGCTACTTTTTGCCTGCCGGTCTCTCCATCCCTGTCTTCCCAGCACCTCCGCTTGGGTTGTTGACACTCTTCGGATTTGAGAATCCTGAGCCCATTGTGTATCTGTATGTATATC	chr3R_689606_689854_+_dCP_twist_center76	twist	CTCATGTGTC	76	SREBP	ATCACGCGAC	68	65	46	142	158	193	6.54025	4.75812	1.78213	2.33306	-2.42507	4.20719
chr3R_689606_689854_+_dCP_twist_center76_to_Stat92E	chr3R_689606_689854	-	AACGAGTGCGAAAGAAAGGGAGGGAGCTGGGATCTCGGGCCAGAGAATCCGAGGGATGAGCATCATCATCTTTCCCGGAAAAACAGCATGCAATGCGATATGATTATTATTATCTAACAATACAATAACAAAACTGCTACTTTTTGCCTGCCGGTCTCTCCATCCCTGTCTTCCCAGCACCTCCGCTTGGGTTGTTGACACTCTTCGGATTTGAGAATCCTGAGCCCATTGTGTATCTGTATGTATATC	chr3R_689606_689854_+_dCP_twist_center76	twist	GCTCATGTGTC	76	Stat92E	TTTCCCGGAAA	118	89	104	58	76	66	4.45545	4.75812	-0.302672	2.33306	-2.42507	2.12239
chr3R_689606_689854_+_dCP_twist_center76_to_Atf2	chr3R_689606_689854	-	AACGAGTGCGAAAGAAAGGGAGGGAGCTGGGATCTCGGGCCAGAGAATCCGAGGGATGAGCATCATCATCATCACGTCATCAACAGCATGCAATGCGATATGATTATTATTATCTAACAATACAATAACAAAACTGCTACTTTTTGCCTGCCGGTCTCTCCATCCCTGTCTTCCCAGCACCTCCGCTTGGGTTGTTGACACTCTTCGGATTTGAGAATCCTGAGCCCATTGTGTATCTGTATGTATATC	chr3R_689606_689854_+_dCP_twist_center76	twist	GCTCATGTGTC	76	Atf2	ATCACGTCATC	125	125	115	42	41	40	3.49752	4.75812	-1.2606	2.33306	-2.42507	1.16446
chr3L_3400766_3401014_+_dCP_twist_center67_to_GATAA	chr3L_3400766_3401014	-	TATCTGTGTGAGTGTTCCGTTTCCCTCTGTATTGGTGTGCCAAATGGCTATGGCAAAACTAAAAGATAAGATTCCGGTATTTGATTGATAGTGAACTGGCAGTTTGTTTATCTCGAGCGCACACGGACCGACCGGAGGCACCGAGAACAGAACGCGATTCTCGTTTGGCTTCGGATTGGGGCTGCTCACACAGATACTCACCACCACCAGTGCGCTATCCCGCACACACACACGTGGCCATCCAGCGGC	chr3L_3400766_3401014_+_dCP_twist_center67	twist	GCAGCTGT	67	GATAA	AGATAAGA	78	55	67	22	21	21	3.4258	6.25399	-2.82819	3.66657	-2.58742	-0.24077
chr3L_3400766_3401014_+_dCP_twist_center67_to_AP1	chr3L_3400766_3401014	-	TATCTGTGTGAGTGTTCCGTTTCCCTCTGTATTGGTGTGCCAAATGGCTATGGCAAAACTAAATGAGTCACTTCCGGTATTTGATTGATAGTGAACTGGCAGTTTGTTTATCTCGAGCGCACACGGACCGACCGGAGGCACCGAGAACAGAACGCGATTCTCGTTTGGCTTCGGATTGGGGCTGCTCACACAGATACTCACCACCACCAGTGCGCTATCCCGCACACACACACGTGGCCATCCAGCGGC	chr3L_3400766_3401014_+_dCP_twist_center67	twist	AGCAGCTGT	67	AP1	ATGAGTCAC	85	78	74	373	399	494	7.49336	6.25399	1.23937	3.66657	-2.58742	3.82679
chr3L_3400766_3401014_+_dCP_twist_center67_to_Trl	chr3L_3400766_3401014	-	TATCTGTGTGAGTGTTCCGTTTCCCTCTGTATTGGTGTGCCAAATGGCTATGGCAAAACTAAAGAGAGAGTTTCCGGTATTTGATTGATAGTGAACTGGCAGTTTGTTTATCTCGAGCGCACACGGACCGACCGGAGGCACCGAGAACAGAACGCGATTCTCGTTTGGCTTCGGATTGGGGCTGCTCACACAGATACTCACCACCACCAGTGCGCTATCCCGCACACACACACGTGGCCATCCAGCGGC	chr3L_3400766_3401014_+_dCP_twist_center67	twist	GCAGCTG	67	Trl	GAGAGAG	249	205	226	237	235	278	5.21569	6.25399	-1.0383	3.66657	-2.58742	1.54912
chr3L_3400766_3401014_+_dCP_twist_center67_to_ETS	chr3L_3400766_3401014	-	TATCTGTGTGAGTGTTCCGTTTCCCTCTGTATTGGTGTGCCAAATGGCTATGGCAAAACTAAACCGGAAGTTTCCGGTATTTGATTGATAGTGAACTGGCAGTTTGTTTATCTCGAGCGCACACGGACCGACCGGAGGCACCGAGAACAGAACGCGATTCTCGTTTGGCTTCGGATTGGGGCTGCTCACACAGATACTCACCACCACCAGTGCGCTATCCCGCACACACACACGTGGCCATCCAGCGGC	chr3L_3400766_3401014_+_dCP_twist_center67	twist	AGCAGCTGT	67	ETS	ACCGGAAGT	85	92	76	78	87	126	5.26751	6.25399	-0.986476	3.66657	-2.58742	1.60095
chr3L_3400766_3401014_+_dCP_twist_center67_to_SREBP	chr3L_3400766_3401014	-	TATCTGTGTGAGTGTTCCGTTTCCCTCTGTATTGGTGTGCCAAATGGCTATGGCAAAACTAAATCACGCGACTCCGGTATTTGATTGATAGTGAACTGGCAGTTTGTTTATCTCGAGCGCACACGGACCGACCGGAGGCACCGAGAACAGAACGCGATTCTCGTTTGGCTTCGGATTGGGGCTGCTCACACAGATACTCACCACCACCAGTGCGCTATCCCGCACACACACACGTGGCCATCCAGCGGC	chr3L_3400766_3401014_+_dCP_twist_center67	twist	AGCAGCTGTT	67	SREBP	ATCACGCGAC	180	154	160	434	507	630	6.75031	6.25399	0.496324	3.66657	-2.58742	3.08375
chr3L_3400766_3401014_+_dCP_twist_center67_to_Stat92E	chr3L_3400766_3401014	-	TATCTGTGTGAGTGTTCCGTTTCCCTCTGTATTGGTGTGCCAAATGGCTATGGCAAAACTATTTCCCGGAAATCCGGTATTTGATTGATAGTGAACTGGCAGTTTGTTTATCTCGAGCGCACACGGACCGACCGGAGGCACCGAGAACAGAACGCGATTCTCGTTTGGCTTCGGATTGGGGCTGCTCACACAGATACTCACCACCACCAGTGCGCTATCCCGCACACACACACGTGGCCATCCAGCGGC	chr3L_3400766_3401014_+_dCP_twist_center67	twist	AAGCAGCTGTT	67	Stat92E	TTTCCCGGAAA	426	361	325	789	721	920	6.19966	6.25399	-0.0543316	3.66657	-2.58742	2.53309
chr3L_3400766_3401014_+_dCP_twist_center67_to_Atf2	chr3L_3400766_3401014	-	TATCTGTGTGAGTGTTCCGTTTCCCTCTGTATTGGTGTGCCAAATGGCTATGGCAAAACTAATCACGTCATCTCCGGTATTTGATTGATAGTGAACTGGCAGTTTGTTTATCTCGAGCGCACACGGACCGACCGGAGGCACCGAGAACAGAACGCGATTCTCGTTTGGCTTCGGATTGGGGCTGCTCACACAGATACTCACCACCACCAGTGCGCTATCCCGCACACACACACGTGGCCATCCAGCGGC	chr3L_3400766_3401014_+_dCP_twist_center67	twist	AAGCAGCTGTT	67	Atf2	ATCACGTCATC	305	268	301	66	97	99	3.35181	6.25399	-2.90218	3.66657	-2.58742	-0.314755
chr2R_17477671_17477919_+_dCP_twist_center110_to_GATAA	chr2R_17477671_17477919	-	GCTATGCTTTTATATGGGACTCACATAAGTATTTACGTATATATACGCGATAAGGAATTCAACCGAATTATTCATCTATATTTTAAGAACTTTTGGAACTTTTGTGAGATAAGACAATTTTGAATTGCTTTTGATTTGATGACGAACTTTAAGCACTGATACTGGATGTTTGTACATGTTTGTATACTGTTGTATAATCATTCCCGCTATAAAATTTATGGATATTGTGAGTTGAAGCGCTAGTAACAC	chr2R_17477671_17477919_+_dCP_twist_center110	twist	ACATATGT	110	GATAA	AGATAAGA	32	24	38	99	89	108	6.72082	5.33164	1.38918	2.97144	-2.36021	3.74939
chr2R_17477671_17477919_+_dCP_twist_center110_to_AP1	chr2R_17477671_17477919	-	GCTATGCTTTTATATGGGACTCACATAAGTATTTACGTATATATACGCGATAAGGAATTCAACCGAATTATTCATCTATATTTTAAGAACTTTTGGAACTTTTGTATGAGTCACCAATTTTGAATTGCTTTTGATTTGATGACGAACTTTAAGCACTGATACTGGATGTTTGTACATGTTTGTATACTGTTGTATAATCATTCCCGCTATAAAATTTATGGATATTGTGAGTTGAAGCGCTAGTAACAC	chr2R_17477671_17477919_+_dCP_twist_center110	twist	GACATATGT	110	AP1	ATGAGTCAC	56	35	51	112	108	147	6.44134	5.33164	1.1097	2.97144	-2.36021	3.4699
chr2R_17477671_17477919_+_dCP_twist_center110_to_Trl	chr2R_17477671_17477919	-	GCTATGCTTTTATATGGGACTCACATAAGTATTTACGTATATATACGCGATAAGGAATTCAACCGAATTATTCATCTATATTTTAAGAACTTTTGGAACTTTTGTGGAGAGAGTCAATTTTGAATTGCTTTTGATTTGATGACGAACTTTAAGCACTGATACTGGATGTTTGTACATGTTTGTATACTGTTGTATAATCATTCCCGCTATAAAATTTATGGATATTGTGAGTTGAAGCGCTAGTAACAC	chr2R_17477671_17477919_+_dCP_twist_center110	twist	ACATATG	110	Trl	GAGAGAG	76	49	47	21	17	30	3.72707	5.33164	-1.60457	2.97144	-2.36021	0.755633
chr2R_17477671_17477919_+_dCP_twist_center110_to_ETS	chr2R_17477671_17477919	-	GCTATGCTTTTATATGGGACTCACATAAGTATTTACGTATATATACGCGATAAGGAATTCAACCGAATTATTCATCTATATTTTAAGAACTTTTGGAACTTTTGTACCGGAAGTCAATTTTGAATTGCTTTTGATTTGATGACGAACTTTAAGCACTGATACTGGATGTTTGTACATGTTTGTATACTGTTGTATAATCATTCCCGCTATAAAATTTATGGATATTGTGAGTTGAAGCGCTAGTAACAC	chr2R_17477671_17477919_+_dCP_twist_center110	twist	GACATATGT	110	ETS	ACCGGAAGT	43	41	41	214	194	255	7.47176	5.33164	2.14011	2.97144	-2.36021	4.50032
chr2R_17477671_17477919_+_dCP_twist_center110_to_SREBP	chr2R_17477671_17477919	-	GCTATGCTTTTATATGGGACTCACATAAGTATTTACGTATATATACGCGATAAGGAATTCAACCGAATTATTCATCTATATTTTAAGAACTTTTGGAACTTTTGTATCACGCGACAATTTTGAATTGCTTTTGATTTGATGACGAACTTTAAGCACTGATACTGGATGTTTGTACATGTTTGTATACTGTTGTATAATCATTCCCGCTATAAAATTTATGGATATTGTGAGTTGAAGCGCTAGTAACAC	chr2R_17477671_17477919_+_dCP_twist_center110	twist	GACATATGTC	110	SREBP	ATCACGCGAC	16	18	13	85	59	80	7.30686	5.33164	1.97522	2.97144	-2.36021	4.33543
chr2R_17477671_17477919_+_dCP_twist_center110_to_Stat92E	chr2R_17477671_17477919	-	GCTATGCTTTTATATGGGACTCACATAAGTATTTACGTATATATACGCGATAAGGAATTCAACCGAATTATTCATCTATATTTTAAGAACTTTTGGAACTTTTGTTTCCCGGAAAAATTTTGAATTGCTTTTGATTTGATGACGAACTTTAAGCACTGATACTGGATGTTTGTACATGTTTGTATACTGTTGTATAATCATTCCCGCTATAAAATTTATGGATATTGTGAGTTGAAGCGCTAGTAACAC	chr2R_17477671_17477919_+_dCP_twist_center110	twist	TGACATATGTC	110	Stat92E	TTTCCCGGAAA	45	37	47	19	30	33	4.42508	5.33164	-0.906567	2.97144	-2.36021	1.45364
chr2R_17477671_17477919_+_dCP_twist_center110_to_Atf2	chr2R_17477671_17477919	-	GCTATGCTTTTATATGGGACTCACATAAGTATTTACGTATATATACGCGATAAGGAATTCAACCGAATTATTCATCTATATTTTAAGAACTTTTGGAACTTTTGATCACGTCATCAATTTTGAATTGCTTTTGATTTGATGACGAACTTTAAGCACTGATACTGGATGTTTGTACATGTTTGTATACTGTTGTATAATCATTCCCGCTATAAAATTTATGGATATTGTGAGTTGAAGCGCTAGTAACAC	chr2R_17477671_17477919_+_dCP_twist_center110	twist	TGACATATGTC	110	Atf2	ATCACGTCATC	72	73	73	60	62	70	4.88437	5.33164	-0.447277	2.97144	-2.36021	1.91293
chr3R_8543729_8543977_+_dCP_twist_center176_to_GATAA	chr3R_8543729_8543977	-	AGAAGCTCCACTGAGAATAATGGAGGGCCATCCAGAATGGTGTTTCCCCATGACAACCAAGTGGATTTTTTTCCCGCTTACGTCACGGCACAATCGGACGAAAAGACTTAAAAATAATAATTTAACAATTTAGCGAGAAATTATCTTGGGTTTCCTTATCGAGTAGGGGCTGAGATAAGATTACTACAGATTGTTATTATGTACTTCTTACACGCTGCCAACAAGTGACTCTTGTTTATCTCAACCTCC	chr3R_8543729_8543977_+_dCP_twist_center176	twist	GCACTTGT	176	GATAA	AGATAAGA	112	85	91	7	3	8	1.05685	5.96011	-4.90325	2.39818	-3.56192	-1.34133
chr3R_8543729_8543977_+_dCP_twist_center176_to_AP1	chr3R_8543729_8543977	-	AGAAGCTCCACTGAGAATAATGGAGGGCCATCCAGAATGGTGTTTCCCCATGACAACCAAGTGGATTTTTTTCCCGCTTACGTCACGGCACAATCGGACGAAAAGACTTAAAAATAATAATTTAACAATTTAGCGAGAAATTATCTTGGGTTTCCTTATCGAGTAGGGGCTATGAGTCACTTACTACAGATTGTTATTATGTACTTCTTACACGCTGCCAACAAGTGACTCTTGTTTATCTCAACCTCC	chr3R_8543729_8543977_+_dCP_twist_center176	twist	GGCACTTGT	176	AP1	ATGAGTCAC	162	153	138	244	258	300	5.90043	5.96011	-0.0596793	2.39818	-3.56192	3.50224
chr3R_8543729_8543977_+_dCP_twist_center176_to_Trl	chr3R_8543729_8543977	-	AGAAGCTCCACTGAGAATAATGGAGGGCCATCCAGAATGGTGTTTCCCCATGACAACCAAGTGGATTTTTTTCCCGCTTACGTCACGGCACAATCGGACGAAAAGACTTAAAAATAATAATTTAACAATTTAGCGAGAAATTATCTTGGGTTTCCTTATCGAGTAGGGGCTGGAGAGAGTTTACTACAGATTGTTATTATGTACTTCTTACACGCTGCCAACAAGTGACTCTTGTTTATCTCAACCTCC	chr3R_8543729_8543977_+_dCP_twist_center176	twist	GCACTTG	176	Trl	GAGAGAG	137	108	143	12	16	24	2.16581	5.96011	-3.79429	2.39818	-3.56192	-0.232368
chr3R_8543729_8543977_+_dCP_twist_center176_to_ETS	chr3R_8543729_8543977	-	AGAAGCTCCACTGAGAATAATGGAGGGCCATCCAGAATGGTGTTTCCCCATGACAACCAAGTGGATTTTTTTCCCGCTTACGTCACGGCACAATCGGACGAAAAGACTTAAAAATAATAATTTAACAATTTAGCGAGAAATTATCTTGGGTTTCCTTATCGAGTAGGGGCTACCGGAAGTTTACTACAGATTGTTATTATGTACTTCTTACACGCTGCCAACAAGTGACTCTTGTTTATCTCAACCTCC	chr3R_8543729_8543977_+_dCP_twist_center176	twist	GGCACTTGT	176	ETS	ACCGGAAGT	160	126	145	1016	917	1076	7.87637	5.96011	1.91627	2.39818	-3.56192	5.47819
chr3R_8543729_8543977_+_dCP_twist_center176_to_SREBP	chr3R_8543729_8543977	-	AGAAGCTCCACTGAGAATAATGGAGGGCCATCCAGAATGGTGTTTCCCCATGACAACCAAGTGGATTTTTTTCCCGCTTACGTCACGGCACAATCGGACGAAAAGACTTAAAAATAATAATTTAACAATTTAGCGAGAAATTATCTTGGGTTTCCTTATCGAGTAGGGGCTATCACGCGACTACTACAGATTGTTATTATGTACTTCTTACACGCTGCCAACAAGTGACTCTTGTTTATCTCAACCTCC	chr3R_8543729_8543977_+_dCP_twist_center176	twist	GGCACTTGTT	176	SREBP	ATCACGCGAC	42	47	47	57	54	53	5.33587	5.96011	-0.624233	2.39818	-3.56192	2.93769
chr3R_8543729_8543977_+_dCP_twist_center176_to_Stat92E	chr3R_8543729_8543977	-	AGAAGCTCCACTGAGAATAATGGAGGGCCATCCAGAATGGTGTTTCCCCATGACAACCAAGTGGATTTTTTTCCCGCTTACGTCACGGCACAATCGGACGAAAAGACTTAAAAATAATAATTTAACAATTTAGCGAGAAATTATCTTGGGTTTCCTTATCGAGTAGGGGCTTTCCCGGAAATACTACAGATTGTTATTATGTACTTCTTACACGCTGCCAACAAGTGACTCTTGTTTATCTCAACCTCC	chr3R_8543729_8543977_+_dCP_twist_center176	twist	TGGCACTTGTT	176	Stat92E	TTTCCCGGAAA	76	71	66	55	65	82	4.99664	5.96011	-0.963468	2.39818	-3.56192	2.59846
chr3R_8543729_8543977_+_dCP_twist_center176_to_Atf2	chr3R_8543729_8543977	-	AGAAGCTCCACTGAGAATAATGGAGGGCCATCCAGAATGGTGTTTCCCCATGACAACCAAGTGGATTTTTTTCCCGCTTACGTCACGGCACAATCGGACGAAAAGACTTAAAAATAATAATTTAACAATTTAGCGAGAAATTATCTTGGGTTTCCTTATCGAGTAGGGGCATCACGTCATCTACTACAGATTGTTATTATGTACTTCTTACACGCTGCCAACAAGTGACTCTTGTTTATCTCAACCTCC	chr3R_8543729_8543977_+_dCP_twist_center176	twist	TGGCACTTGTT	176	Atf2	ATCACGTCATC	125	95	107	47	46	44	3.81883	5.96011	-2.14128	2.39818	-3.56192	1.42064
chrX_18141174_18141422_+_dCP_twist_center86_to_GATAA	chrX_18141174_18141422	+	ACTTTTCCACTGAACTCTTATCGCCGCGCGTCGTCAGAGGCTGAACTTTGAGGCGTCGTCGGCCAGGGAATTCACCTCGCAGAGATAAGACTTCGTTGGGTGTTGACTAATGCCGTTCTATGAATGAATAATCGGACTGGCTACGCCCCCGCCACCGCCACCTCGATACAATATGTGTATATCGCTCCATGGATATACGAGGAGACCACTCACATCGACTGGGGCGGCACTTGGCATTCGCTGGACACA	chrX_18141174_18141422_+_dCP_twist_center86	twist	CCAATTGT	86	GATAA	AGATAAGA	450	430	411	300	403	436	4.90915	3.8854	1.02375	1.5144	-2.371	3.39475
chrX_18141174_18141422_+_dCP_twist_center86_to_AP1	chrX_18141174_18141422	+	ACTTTTCCACTGAACTCTTATCGCCGCGCGTCGTCAGAGGCTGAACTTTGAGGCGTCGTCGGCCAGGGAATTCACCTCGCAATGAGTCACCTTCGTTGGGTGTTGACTAATGCCGTTCTATGAATGAATAATCGGACTGGCTACGCCCCCGCCACCGCCACCTCGATACAATATGTGTATATCGCTCCATGGATATACGAGGAGACCACTCACATCGACTGGGGCGGCACTTGGCATTCGCTGGACACA	chrX_18141174_18141422_+_dCP_twist_center86	twist	GCCAATTGT	86	AP1	ATGAGTCAC	331	344	320	157	180	193	4.16867	3.8854	0.283268	1.5144	-2.371	2.65427
chrX_18141174_18141422_+_dCP_twist_center86_to_Trl	chrX_18141174_18141422	+	ACTTTTCCACTGAACTCTTATCGCCGCGCGTCGTCAGAGGCTGAACTTTGAGGCGTCGTCGGCCAGGGAATTCACCTCGCAGGAGAGAGTCTTCGTTGGGTGTTGACTAATGCCGTTCTATGAATGAATAATCGGACTGGCTACGCCCCCGCCACCGCCACCTCGATACAATATGTGTATATCGCTCCATGGATATACGAGGAGACCACTCACATCGACTGGGGCGGCACTTGGCATTCGCTGGACACA	chrX_18141174_18141422_+_dCP_twist_center86	twist	CCAATTG	86	Trl	GAGAGAG	209	153	156	19	35	29	2.45729	3.8854	-1.42811	1.5144	-2.371	0.942896
chrX_18141174_18141422_+_dCP_twist_center86_to_ETS	chrX_18141174_18141422	+	ACTTTTCCACTGAACTCTTATCGCCGCGCGTCGTCAGAGGCTGAACTTTGAGGCGTCGTCGGCCAGGGAATTCACCTCGCAACCGGAAGTCTTCGTTGGGTGTTGACTAATGCCGTTCTATGAATGAATAATCGGACTGGCTACGCCCCCGCCACCGCCACCTCGATACAATATGTGTATATCGCTCCATGGATATACGAGGAGACCACTCACATCGACTGGGGCGGCACTTGGCATTCGCTGGACACA	chrX_18141174_18141422_+_dCP_twist_center86	twist	GCCAATTGT	86	ETS	ACCGGAAGT	95	86	88	189	226	244	6.37687	3.8854	2.49147	1.5144	-2.371	4.86247
chrX_18141174_18141422_+_dCP_twist_center86_to_SREBP	chrX_18141174_18141422	+	ACTTTTCCACTGAACTCTTATCGCCGCGCGTCGTCAGAGGCTGAACTTTGAGGCGTCGTCGGCCAGGGAATTCACCTCGCAATCACGCGACTTCGTTGGGTGTTGACTAATGCCGTTCTATGAATGAATAATCGGACTGGCTACGCCCCCGCCACCGCCACCTCGATACAATATGTGTATATCGCTCCATGGATATACGAGGAGACCACTCACATCGACTGGGGCGGCACTTGGCATTCGCTGGACACA	chrX_18141174_18141422_+_dCP_twist_center86	twist	GCCAATTGTC	86	SREBP	ATCACGCGAC	126	118	157	252	350	426	6.4401	3.8854	2.5547	1.5144	-2.371	4.9257
chrX_18141174_18141422_+_dCP_twist_center86_to_Stat92E	chrX_18141174_18141422	+	ACTTTTCCACTGAACTCTTATCGCCGCGCGTCGTCAGAGGCTGAACTTTGAGGCGTCGTCGGCCAGGGAATTCACCTCGCTTTCCCGGAAATTCGTTGGGTGTTGACTAATGCCGTTCTATGAATGAATAATCGGACTGGCTACGCCCCCGCCACCGCCACCTCGATACAATATGTGTATATCGCTCCATGGATATACGAGGAGACCACTCACATCGACTGGGGCGGCACTTGGCATTCGCTGGACACA	chrX_18141174_18141422_+_dCP_twist_center86	twist	AGCCAATTGTC	86	Stat92E	TTTCCCGGAAA	382	333	320	166	208	273	4.40314	3.8854	0.517745	1.5144	-2.371	2.88875
chrX_18141174_18141422_+_dCP_twist_center86_to_Atf2	chrX_18141174_18141422	+	ACTTTTCCACTGAACTCTTATCGCCGCGCGTCGTCAGAGGCTGAACTTTGAGGCGTCGTCGGCCAGGGAATTCACCTCGCATCACGTCATCTTCGTTGGGTGTTGACTAATGCCGTTCTATGAATGAATAATCGGACTGGCTACGCCCCCGCCACCGCCACCTCGATACAATATGTGTATATCGCTCCATGGATATACGAGGAGACCACTCACATCGACTGGGGCGGCACTTGGCATTCGCTGGACACA	chrX_18141174_18141422_+_dCP_twist_center86	twist	AGCCAATTGTC	86	Atf2	ATCACGTCATC	193	144	140	149	187	230	5.33592	3.8854	1.45052	1.5144	-2.371	3.82152
chr3R_11065911_11066159_+_dCP_twist_center75_to_GATAA	chr3R_11065911_11066159	-	CAAATGGCAAACCAGCTCATATCAGAGACAACAACAAACAGTGAGGAGATCAAGGAGAAGCAATTGGTGCTAGATAAGATGATCAGACACAATAAACTAAATCAAAAGTTGTCCAGCACGCTGCTTAACAATATTATCTCGAATGAAATGCTAAAGCGCAACGAATGCTTAGCGACGATTCGAGAGATCTTCATCCATGCTGATAAATGTGGTCAAGATAAGGCGTCCGCTGACTTAGAACCCATCATA	chr3R_11065911_11066159_+_dCP_twist_center75	twist	GCAGATGC	75	GATAA	AGATAAGA	27	16	20	54	38	62	6.34745	5.4262	0.921251	2.8745	-2.5517	3.47296
chr3R_11065911_11066159_+_dCP_twist_center75_to_AP1	chr3R_11065911_11066159	-	CAAATGGCAAACCAGCTCATATCAGAGACAACAACAAACAGTGAGGAGATCAAGGAGAAGCAATTGGTGCATGAGTCACTGATCAGACACAATAAACTAAATCAAAAGTTGTCCAGCACGCTGCTTAACAATATTATCTCGAATGAAATGCTAAAGCGCAACGAATGCTTAGCGACGATTCGAGAGATCTTCATCCATGCTGATAAATGTGGTCAAGATAAGGCGTCCGCTGACTTAGAACCCATCATA	chr3R_11065911_11066159_+_dCP_twist_center75	twist	TGCAGATGC	75	AP1	ATGAGTCAC	39	22	29	161	167	151	7.50356	5.4262	2.07735	2.8745	-2.5517	4.62906
chr3R_11065911_11066159_+_dCP_twist_center75_to_Trl	chr3R_11065911_11066159	-	CAAATGGCAAACCAGCTCATATCAGAGACAACAACAAACAGTGAGGAGATCAAGGAGAAGCAATTGGTGCTGAGAGAGCTGATCAGACACAATAAACTAAATCAAAAGTTGTCCAGCACGCTGCTTAACAATATTATCTCGAATGAAATGCTAAAGCGCAACGAATGCTTAGCGACGATTCGAGAGATCTTCATCCATGCTGATAAATGTGGTCAAGATAAGGCGTCCGCTGACTTAGAACCCATCATA	chr3R_11065911_11066159_+_dCP_twist_center75	twist	GCAGATG	75	Trl	GAGAGAG	117	127	102	177	107	134	5.31937	5.4262	-0.106829	2.8745	-2.5517	2.44488
chr3R_11065911_11066159_+_dCP_twist_center75_to_ETS	chr3R_11065911_11066159	-	CAAATGGCAAACCAGCTCATATCAGAGACAACAACAAACAGTGAGGAGATCAAGGAGAAGCAATTGGTGCACCGGAAGTTGATCAGACACAATAAACTAAATCAAAAGTTGTCCAGCACGCTGCTTAACAATATTATCTCGAATGAAATGCTAAAGCGCAACGAATGCTTAGCGACGATTCGAGAGATCTTCATCCATGCTGATAAATGTGGTCAAGATAAGGCGTCCGCTGACTTAGAACCCATCATA	chr3R_11065911_11066159_+_dCP_twist_center75	twist	TGCAGATGC	75	ETS	ACCGGAAGT	130	117	109	936	791	908	7.95659	5.4262	2.53039	2.8745	-2.5517	5.08209
chr3R_11065911_11066159_+_dCP_twist_center75_to_SREBP	chr3R_11065911_11066159	-	CAAATGGCAAACCAGCTCATATCAGAGACAACAACAAACAGTGAGGAGATCAAGGAGAAGCAATTGGTGCATCACGCGACGATCAGACACAATAAACTAAATCAAAAGTTGTCCAGCACGCTGCTTAACAATATTATCTCGAATGAAATGCTAAAGCGCAACGAATGCTTAGCGACGATTCGAGAGATCTTCATCCATGCTGATAAATGTGGTCAAGATAAGGCGTCCGCTGACTTAGAACCCATCATA	chr3R_11065911_11066159_+_dCP_twist_center75	twist	TGCAGATGCT	75	SREBP	ATCACGCGAC	40	46	39	192	158	202	7.20168	5.4262	1.77548	2.8745	-2.5517	4.32718
chr3R_11065911_11066159_+_dCP_twist_center75_to_Stat92E	chr3R_11065911_11066159	-	CAAATGGCAAACCAGCTCATATCAGAGACAACAACAAACAGTGAGGAGATCAAGGAGAAGCAATTGGTGTTTCCCGGAAAGATCAGACACAATAAACTAAATCAAAAGTTGTCCAGCACGCTGCTTAACAATATTATCTCGAATGAAATGCTAAAGCGCAACGAATGCTTAGCGACGATTCGAGAGATCTTCATCCATGCTGATAAATGTGGTCAAGATAAGGCGTCCGCTGACTTAGAACCCATCATA	chr3R_11065911_11066159_+_dCP_twist_center75	twist	CTGCAGATGCT	75	Stat92E	TTTCCCGGAAA	47	31	44	110	123	149	6.72671	5.4262	1.30051	2.8745	-2.5517	3.85221
chr3R_11065911_11066159_+_dCP_twist_center75_to_Atf2	chr3R_11065911_11066159	-	CAAATGGCAAACCAGCTCATATCAGAGACAACAACAAACAGTGAGGAGATCAAGGAGAAGCAATTGGTGATCACGTCATCGATCAGACACAATAAACTAAATCAAAAGTTGTCCAGCACGCTGCTTAACAATATTATCTCGAATGAAATGCTAAAGCGCAACGAATGCTTAGCGACGATTCGAGAGATCTTCATCCATGCTGATAAATGTGGTCAAGATAAGGCGTCCGCTGACTTAGAACCCATCATA	chr3R_11065911_11066159_+_dCP_twist_center75	twist	CTGCAGATGCT	75	Atf2	ATCACGTCATC	40	35	31	136	118	140	6.96163	5.4262	1.53543	2.8745	-2.5517	4.08713
chrX_950423_950671_+_dCP_twist_center208_to_GATAA	chrX_950423_950671	-	TTACAGTTTCGCAATTTTAAGCGAAAATCGCTGACGCAGCGTGTGTGACAGCGTCAGCCGCAGACCCCCGGTCTCCCCCCTTGGACGTCGAGTGTCTTTGCATAATTTTTAGACAACCGCACGAGGGCGACTTTTATGTCATCAGCGGTTTTGTCCGCATTCCACCCACTCCTCCACCACCGCCAAAAACCCCGACGACTTCCGAGATAAGACAGCGGATTTAATGTGCAGTTTTAATCAAATTTACAT	chrX_950423_950671_+_dCP_twist_center208	twist	ACAGCTGT	208	GATAA	AGATAAGA	55	55	41	28	33	38	4.46242	3.81388	0.648543	1.54567	-2.26821	2.91675
chrX_950423_950671_+_dCP_twist_center208_to_AP1	chrX_950423_950671	-	TTACAGTTTCGCAATTTTAAGCGAAAATCGCTGACGCAGCGTGTGTGACAGCGTCAGCCGCAGACCCCCGGTCTCCCCCCTTGGACGTCGAGTGTCTTTGCATAATTTTTAGACAACCGCACGAGGGCGACTTTTATGTCATCAGCGGTTTTGTCCGCATTCCACCCACTCCTCCACCACCGCCAAAAACCCCGACGACTTCCATGAGTCACCAGCGGATTTAATGTGCAGTTTTAATCAAATTTACAT	chrX_950423_950671_+_dCP_twist_center208	twist	GACAGCTGT	208	AP1	ATGAGTCAC	149	140	131	43	43	58	3.51962	3.81388	-0.29426	1.54567	-2.26821	1.97395
chrX_950423_950671_+_dCP_twist_center208_to_Trl	chrX_950423_950671	-	TTACAGTTTCGCAATTTTAAGCGAAAATCGCTGACGCAGCGTGTGTGACAGCGTCAGCCGCAGACCCCCGGTCTCCCCCCTTGGACGTCGAGTGTCTTTGCATAATTTTTAGACAACCGCACGAGGGCGACTTTTATGTCATCAGCGGTTTTGTCCGCATTCCACCCACTCCTCCACCACCGCCAAAAACCCCGACGACTTCCGGAGAGAGTCAGCGGATTTAATGTGCAGTTTTAATCAAATTTACAT	chrX_950423_950671_+_dCP_twist_center208	twist	ACAGCTG	208	Trl	GAGAGAG	109	83	98	25	27	41	3.42544	3.81388	-0.38844	1.54567	-2.26821	1.87977
chrX_950423_950671_+_dCP_twist_center208_to_ETS	chrX_950423_950671	-	TTACAGTTTCGCAATTTTAAGCGAAAATCGCTGACGCAGCGTGTGTGACAGCGTCAGCCGCAGACCCCCGGTCTCCCCCCTTGGACGTCGAGTGTCTTTGCATAATTTTTAGACAACCGCACGAGGGCGACTTTTATGTCATCAGCGGTTTTGTCCGCATTCCACCCACTCCTCCACCACCGCCAAAAACCCCGACGACTTCCACCGGAAGTCAGCGGATTTAATGTGCAGTTTTAATCAAATTTACAT	chrX_950423_950671_+_dCP_twist_center208	twist	GACAGCTGT	208	ETS	ACCGGAAGT	174	173	147	147	152	183	5.03626	3.81388	1.22239	1.54567	-2.26821	3.4906
chrX_950423_950671_+_dCP_twist_center208_to_SREBP	chrX_950423_950671	-	TTACAGTTTCGCAATTTTAAGCGAAAATCGCTGACGCAGCGTGTGTGACAGCGTCAGCCGCAGACCCCCGGTCTCCCCCCTTGGACGTCGAGTGTCTTTGCATAATTTTTAGACAACCGCACGAGGGCGACTTTTATGTCATCAGCGGTTTTGTCCGCATTCCACCCACTCCTCCACCACCGCCAAAAACCCCGACGACTTCCATCACGCGACAGCGGATTTAATGTGCAGTTTTAATCAAATTTACAT	chrX_950423_950671_+_dCP_twist_center208	twist	GACAGCTGTC	208	SREBP	ATCACGCGAC	74	75	70	14	19	24	3.12345	3.81388	-0.690425	1.54567	-2.26821	1.57778
chrX_950423_950671_+_dCP_twist_center208_to_Stat92E	chrX_950423_950671	-	TTACAGTTTCGCAATTTTAAGCGAAAATCGCTGACGCAGCGTGTGTGACAGCGTCAGCCGCAGACCCCCGGTCTCCCCCCTTGGACGTCGAGTGTCTTTGCATAATTTTTAGACAACCGCACGAGGGCGACTTTTATGTCATCAGCGGTTTTGTCCGCATTCCACCCACTCCTCCACCACCGCCAAAAACCCCGACGACTTCTTTCCCGGAAAAGCGGATTTAATGTGCAGTTTTAATCAAATTTACAT	chrX_950423_950671_+_dCP_twist_center208	twist	CGACAGCTGTC	208	Stat92E	TTTCCCGGAAA	212	189	184	23	25	32	2.19493	3.81388	-1.61895	1.54567	-2.26821	0.649261
chrX_950423_950671_+_dCP_twist_center208_to_Atf2	chrX_950423_950671	-	TTACAGTTTCGCAATTTTAAGCGAAAATCGCTGACGCAGCGTGTGTGACAGCGTCAGCCGCAGACCCCCGGTCTCCCCCCTTGGACGTCGAGTGTCTTTGCATAATTTTTAGACAACCGCACGAGGGCGACTTTTATGTCATCAGCGGTTTTGTCCGCATTCCACCCACTCCTCCACCACCGCCAAAAACCCCGACGACTTCATCACGTCATCAGCGGATTTAATGTGCAGTTTTAATCAAATTTACAT	chrX_950423_950671_+_dCP_twist_center208	twist	CGACAGCTGTC	208	Atf2	ATCACGTCATC	358	314	337	61	43	66	2.4844	3.81388	-1.32948	1.54567	-2.26821	0.938729
chrX_16176292_16176540_+_dCP_twist_center215_to_GATAA	chrX_16176292_16176540	-	CCAGCGATTTGGCAAGACTCAGCACTTGGCAATTCCGACTGGAGCTGCCATAAAGCTGATAAGTGAGTTACGGACAAGCTGTGTACACCAATTAGACGTCATGCCTATGGTGCGGCATATACAGATAGCGAGGTCAAGGCGTACAAGTGGCTTCCGATAAGGCAAAAACGCCCCATTTCAAAAAAACCGGAGTGATTAAAGGCAGCCTCAGAGATAAGAACATACATACATCAATCATACTCCTCTAAC	chrX_16176292_16176540_+_dCP_twist_center215	twist	GCATTTGT	215	GATAA	AGATAAGA	45	33	43	66	70	81	5.91713	3.95703	1.9601	1.55182	-2.40521	4.36531
chrX_16176292_16176540_+_dCP_twist_center215_to_AP1	chrX_16176292_16176540	-	CCAGCGATTTGGCAAGACTCAGCACTTGGCAATTCCGACTGGAGCTGCCATAAAGCTGATAAGTGAGTTACGGACAAGCTGTGTACACCAATTAGACGTCATGCCTATGGTGCGGCATATACAGATAGCGAGGTCAAGGCGTACAAGTGGCTTCCGATAAGGCAAAAACGCCCCATTTCAAAAAAACCGGAGTGATTAAAGGCAGCCTCAATGAGTCACACATACATACATCAATCATACTCCTCTAAC	chrX_16176292_16176540_+_dCP_twist_center215	twist	GGCATTTGT	215	AP1	ATGAGTCAC	101	117	115	121	141	165	5.42991	3.95703	1.47288	1.55182	-2.40521	3.87809
chrX_16176292_16176540_+_dCP_twist_center215_to_Trl	chrX_16176292_16176540	-	CCAGCGATTTGGCAAGACTCAGCACTTGGCAATTCCGACTGGAGCTGCCATAAAGCTGATAAGTGAGTTACGGACAAGCTGTGTACACCAATTAGACGTCATGCCTATGGTGCGGCATATACAGATAGCGAGGTCAAGGCGTACAAGTGGCTTCCGATAAGGCAAAAACGCCCCATTTCAAAAAAACCGGAGTGATTAAAGGCAGCCTCAGGAGAGAGTACATACATACATCAATCATACTCCTCTAAC	chrX_16176292_16176540_+_dCP_twist_center215	twist	GCATTTG	215	Trl	GAGAGAG	147	148	133	27	28	28	2.69902	3.95703	-1.25801	1.55182	-2.40521	1.1472
chrX_16176292_16176540_+_dCP_twist_center215_to_ETS	chrX_16176292_16176540	-	CCAGCGATTTGGCAAGACTCAGCACTTGGCAATTCCGACTGGAGCTGCCATAAAGCTGATAAGTGAGTTACGGACAAGCTGTGTACACCAATTAGACGTCATGCCTATGGTGCGGCATATACAGATAGCGAGGTCAAGGCGTACAAGTGGCTTCCGATAAGGCAAAAACGCCCCATTTCAAAAAAACCGGAGTGATTAAAGGCAGCCTCAACCGGAAGTACATACATACATCAATCATACTCCTCTAAC	chrX_16176292_16176540_+_dCP_twist_center215	twist	GGCATTTGT	215	ETS	ACCGGAAGT	69	52	45	161	146	140	6.5098	3.95703	2.55277	1.55182	-2.40521	4.95798
chrX_16176292_16176540_+_dCP_twist_center215_to_SREBP	chrX_16176292_16176540	-	CCAGCGATTTGGCAAGACTCAGCACTTGGCAATTCCGACTGGAGCTGCCATAAAGCTGATAAGTGAGTTACGGACAAGCTGTGTACACCAATTAGACGTCATGCCTATGGTGCGGCATATACAGATAGCGAGGTCAAGGCGTACAAGTGGCTTCCGATAAGGCAAAAACGCCCCATTTCAAAAAAACCGGAGTGATTAAAGGCAGCCTCAATCACGCGACCATACATACATCAATCATACTCCTCTAAC	chrX_16176292_16176540_+_dCP_twist_center215	twist	GGCATTTGTA	215	SREBP	ATCACGCGAC	28	30	32	32	26	28	4.99309	3.95703	1.03606	1.55182	-2.40521	3.44127
chrX_16176292_16176540_+_dCP_twist_center215_to_Stat92E	chrX_16176292_16176540	-	CCAGCGATTTGGCAAGACTCAGCACTTGGCAATTCCGACTGGAGCTGCCATAAAGCTGATAAGTGAGTTACGGACAAGCTGTGTACACCAATTAGACGTCATGCCTATGGTGCGGCATATACAGATAGCGAGGTCAAGGCGTACAAGTGGCTTCCGATAAGGCAAAAACGCCCCATTTCAAAAAAACCGGAGTGATTAAAGGCAGCCTCTTTCCCGGAAACATACATACATCAATCATACTCCTCTAAC	chrX_16176292_16176540_+_dCP_twist_center215	twist	AGGCATTTGTA	215	Stat92E	TTTCCCGGAAA	118	116	111	140	105	119	5.13618	3.95703	1.17915	1.55182	-2.40521	3.58436
chrX_16176292_16176540_+_dCP_twist_center215_to_Atf2	chrX_16176292_16176540	-	CCAGCGATTTGGCAAGACTCAGCACTTGGCAATTCCGACTGGAGCTGCCATAAAGCTGATAAGTGAGTTACGGACAAGCTGTGTACACCAATTAGACGTCATGCCTATGGTGCGGCATATACAGATAGCGAGGTCAAGGCGTACAAGTGGCTTCCGATAAGGCAAAAACGCCCCATTTCAAAAAAACCGGAGTGATTAAAGGCAGCCTCATCACGTCATCCATACATACATCAATCATACTCCTCTAAC	chrX_16176292_16176540_+_dCP_twist_center215	twist	AGGCATTTGTA	215	Atf2	ATCACGTCATC	56	54	58	62	51	50	5.01965	3.95703	1.06262	1.55182	-2.40521	3.46783
chr3R_26389480_26389728_+_dCP_twist_center122_to_GATAA	chr3R_26389480_26389728	+	ATTTAATAGCTCTTATTATGTCATCGCTTTCTTTTTTTTAACCTTTGTTTTGTGTCTCGATTTCGGCATATTTAGCATTTTTATATAATTTCAAGCTAAATTCCCTTATCGCGCTGAAAGATAAGATTTCAATTCGTTTACCGCTATGTCGAGCCTTATCTCTCCCATATCGAGTTACTCACTTCCCAGCAATGACGCTATAGATATCGACCATCCACCACCACTCGAGATTGTTAATCCCTCGCAAAC	chr3R_26389480_26389728_+_dCP_twist_center122	twist	ACAGCTGT	122	GATAA	AGATAAGA	78	95	76	14	19	30	3.07636	6.79719	-3.72083	4.05251	-2.74468	-0.976154
chr3R_26389480_26389728_+_dCP_twist_center122_to_AP1	chr3R_26389480_26389728	+	ATTTAATAGCTCTTATTATGTCATCGCTTTCTTTTTTTTAACCTTTGTTTTGTGTCTCGATTTCGGCATATTTAGCATTTTTATATAATTTCAAGCTAAATTCCCTTATCGCGCTGAATGAGTCACTTTCAATTCGTTTACCGCTATGTCGAGCCTTATCTCTCCCATATCGAGTTACTCACTTCCCAGCAATGACGCTATAGATATCGACCATCCACCACCACTCGAGATTGTTAATCCCTCGCAAAC	chr3R_26389480_26389728_+_dCP_twist_center122	twist	AACAGCTGT	122	AP1	ATGAGTCAC	103	79	83	247	223	257	6.52929	6.79719	-0.267902	4.05251	-2.74468	2.47678
chr3R_26389480_26389728_+_dCP_twist_center122_to_Trl	chr3R_26389480_26389728	+	ATTTAATAGCTCTTATTATGTCATCGCTTTCTTTTTTTTAACCTTTGTTTTGTGTCTCGATTTCGGCATATTTAGCATTTTTATATAATTTCAAGCTAAATTCCCTTATCGCGCTGAAGAGAGAGTTTTCAATTCGTTTACCGCTATGTCGAGCCTTATCTCTCCCATATCGAGTTACTCACTTCCCAGCAATGACGCTATAGATATCGACCATCCACCACCACTCGAGATTGTTAATCCCTCGCAAAC	chr3R_26389480_26389728_+_dCP_twist_center122	twist	ACAGCTG	122	Trl	GAGAGAG	231	174	183	55	36	48	2.97899	6.79719	-3.8182	4.05251	-2.74468	-1.07353
chr3R_26389480_26389728_+_dCP_twist_center122_to_ETS	chr3R_26389480_26389728	+	ATTTAATAGCTCTTATTATGTCATCGCTTTCTTTTTTTTAACCTTTGTTTTGTGTCTCGATTTCGGCATATTTAGCATTTTTATATAATTTCAAGCTAAATTCCCTTATCGCGCTGAACCGGAAGTTTTCAATTCGTTTACCGCTATGTCGAGCCTTATCTCTCCCATATCGAGTTACTCACTTCCCAGCAATGACGCTATAGATATCGACCATCCACCACCACTCGAGATTGTTAATCCCTCGCAAAC	chr3R_26389480_26389728_+_dCP_twist_center122	twist	AACAGCTGT	122	ETS	ACCGGAAGT	158	127	143	2136	2286	2647	9.1279	6.79719	2.33071	4.05251	-2.74468	5.07539
chr3R_26389480_26389728_+_dCP_twist_center122_to_SREBP	chr3R_26389480_26389728	+	ATTTAATAGCTCTTATTATGTCATCGCTTTCTTTTTTTTAACCTTTGTTTTGTGTCTCGATTTCGGCATATTTAGCATTTTTATATAATTTCAAGCTAAATTCCCTTATCGCGCTGAATCACGCGACTTCAATTCGTTTACCGCTATGTCGAGCCTTATCTCTCCCATATCGAGTTACTCACTTCCCAGCAATGACGCTATAGATATCGACCATCCACCACCACTCGAGATTGTTAATCCCTCGCAAAC	chr3R_26389480_26389728_+_dCP_twist_center122	twist	AACAGCTGTT	122	SREBP	ATCACGCGAC	89	80	79	145	159	203	6.10579	6.79719	-0.691403	4.05251	-2.74468	2.05328
chr3R_26389480_26389728_+_dCP_twist_center122_to_Stat92E	chr3R_26389480_26389728	+	ATTTAATAGCTCTTATTATGTCATCGCTTTCTTTTTTTTAACCTTTGTTTTGTGTCTCGATTTCGGCATATTTAGCATTTTTATATAATTTCAAGCTAAATTCCCTTATCGCGCTGTTTCCCGGAAATTCAATTCGTTTACCGCTATGTCGAGCCTTATCTCTCCCATATCGAGTTACTCACTTCCCAGCAATGACGCTATAGATATCGACCATCCACCACCACTCGAGATTGTTAATCCCTCGCAAAC	chr3R_26389480_26389728_+_dCP_twist_center122	twist	AAACAGCTGTT	122	Stat92E	TTTCCCGGAAA	144	128	132	3847	3766	4403	9.96976	6.79719	3.17257	4.05251	-2.74468	5.91725
chr3R_26389480_26389728_+_dCP_twist_center122_to_Atf2	chr3R_26389480_26389728	+	ATTTAATAGCTCTTATTATGTCATCGCTTTCTTTTTTTTAACCTTTGTTTTGTGTCTCGATTTCGGCATATTTAGCATTTTTATATAATTTCAAGCTAAATTCCCTTATCGCGCTGATCACGTCATCTTCAATTCGTTTACCGCTATGTCGAGCCTTATCTCTCCCATATCGAGTTACTCACTTCCCAGCAATGACGCTATAGATATCGACCATCCACCACCACTCGAGATTGTTAATCCCTCGCAAAC	chr3R_26389480_26389728_+_dCP_twist_center122	twist	AAACAGCTGTT	122	Atf2	ATCACGTCATC	63	61	65	116	124	190	6.24965	6.79719	-0.547547	4.05251	-2.74468	2.19713
chr3R_2902396_2902644_+_dCP_twist_center113_to_GATAA	chr3R_2902396_2902644	-	TCATTTTGTCGCTGCTGGTTGTGGTTTCAGTGACTGCAATGCATAACAATGAAAAGTGAATCAGATGCGGTCGGAAATACGAGTACCCTAGACTACAAATTCAGTCACGAGATAAGAGGATGTGACGCCCGGCACAATGACGCCCGTCATCCGACATCACCCCACCACTGGCAAATCTTGGCGAAGTGGAGTGAAAACGAGAGACCCATTTGTTCTGCCCTTCTGCCACCTTATCGACGGTTTCTCTAC	chr3R_2902396_2902644_+_dCP_twist_center113	twist	CCACTTGC	113	GATAA	AGATAAGA	127	117	134	675	762	807	7.65226	9.05139	-1.39912	6.29719	-2.7542	1.35507
chr3R_2902396_2902644_+_dCP_twist_center113_to_AP1	chr3R_2902396_2902644	-	TCATTTTGTCGCTGCTGGTTGTGGTTTCAGTGACTGCAATGCATAACAATGAAAAGTGAATCAGATGCGGTCGGAAATACGAGTACCCTAGACTACAAATTCAGTCACATGAGTCACGGATGTGACGCCCGGCACAATGACGCCCGTCATCCGACATCACCCCACCACTGGCAAATCTTGGCGAAGTGGAGTGAAAACGAGAGACCCATTTGTTCTGCCCTTCTGCCACCTTATCGACGGTTTCTCTAC	chr3R_2902396_2902644_+_dCP_twist_center113	twist	GCCACTTGC	113	AP1	ATGAGTCAC	223	220	187	885	1018	1096	7.33588	9.05139	-1.71551	6.29719	-2.7542	1.03869
chr3R_2902396_2902644_+_dCP_twist_center113_to_Trl	chr3R_2902396_2902644	-	TCATTTTGTCGCTGCTGGTTGTGGTTTCAGTGACTGCAATGCATAACAATGAAAAGTGAATCAGATGCGGTCGGAAATACGAGTACCCTAGACTACAAATTCAGTCACGGAGAGAGCGGATGTGACGCCCGGCACAATGACGCCCGTCATCCGACATCACCCCACCACTGGCAAATCTTGGCGAAGTGGAGTGAAAACGAGAGACCCATTTGTTCTGCCCTTCTGCCACCTTATCGACGGTTTCTCTAC	chr3R_2902396_2902644_+_dCP_twist_center113	twist	CCACTTG	113	Trl	GAGAGAG	108	92	101	224	239	277	6.37524	9.05139	-2.67615	6.29719	-2.7542	0.078052
chr3R_2902396_2902644_+_dCP_twist_center113_to_ETS	chr3R_2902396_2902644	-	TCATTTTGTCGCTGCTGGTTGTGGTTTCAGTGACTGCAATGCATAACAATGAAAAGTGAATCAGATGCGGTCGGAAATACGAGTACCCTAGACTACAAATTCAGTCACACCGGAAGTGGATGTGACGCCCGGCACAATGACGCCCGTCATCCGACATCACCCCACCACTGGCAAATCTTGGCGAAGTGGAGTGAAAACGAGAGACCCATTTGTTCTGCCCTTCTGCCACCTTATCGACGGTTTCTCTAC	chr3R_2902396_2902644_+_dCP_twist_center113	twist	GCCACTTGC	113	ETS	ACCGGAAGT	95	65	70	340	371	423	7.38929	9.05139	-1.6621	6.29719	-2.7542	1.0921
chr3R_2902396_2902644_+_dCP_twist_center113_to_SREBP	chr3R_2902396_2902644	-	TCATTTTGTCGCTGCTGGTTGTGGTTTCAGTGACTGCAATGCATAACAATGAAAAGTGAATCAGATGCGGTCGGAAATACGAGTACCCTAGACTACAAATTCAGTCACATCACGCGACGATGTGACGCCCGGCACAATGACGCCCGTCATCCGACATCACCCCACCACTGGCAAATCTTGGCGAAGTGGAGTGAAAACGAGAGACCCATTTGTTCTGCCCTTCTGCCACCTTATCGACGGTTTCTCTAC	chr3R_2902396_2902644_+_dCP_twist_center113	twist	GCCACTTGCG	113	SREBP	ATCACGCGAC	109	84	95	449	532	565	7.515	9.05139	-1.53639	6.29719	-2.7542	1.21781
chr3R_2902396_2902644_+_dCP_twist_center113_to_Stat92E	chr3R_2902396_2902644	-	TCATTTTGTCGCTGCTGGTTGTGGTTTCAGTGACTGCAATGCATAACAATGAAAAGTGAATCAGATGCGGTCGGAAATACGAGTACCCTAGACTACAAATTCAGTCATTTCCCGGAAAGATGTGACGCCCGGCACAATGACGCCCGTCATCCGACATCACCCCACCACTGGCAAATCTTGGCGAAGTGGAGTGAAAACGAGAGACCCATTTGTTCTGCCCTTCTGCCACCTTATCGACGGTTTCTCTAC	chr3R_2902396_2902644_+_dCP_twist_center113	twist	CGCCACTTGCG	113	Stat92E	TTTCCCGGAAA	234	187	211	539	599	682	6.60975	9.05139	-2.44163	6.29719	-2.7542	0.312563
chr3R_2902396_2902644_+_dCP_twist_center113_to_Atf2	chr3R_2902396_2902644	-	TCATTTTGTCGCTGCTGGTTGTGGTTTCAGTGACTGCAATGCATAACAATGAAAAGTGAATCAGATGCGGTCGGAAATACGAGTACCCTAGACTACAAATTCAGTCAATCACGTCATCGATGTGACGCCCGGCACAATGACGCCCGTCATCCGACATCACCCCACCACTGGCAAATCTTGGCGAAGTGGAGTGAAAACGAGAGACCCATTTGTTCTGCCCTTCTGCCACCTTATCGACGGTTTCTCTAC	chr3R_2902396_2902644_+_dCP_twist_center113	twist	CGCCACTTGCG	113	Atf2	ATCACGTCATC	122	105	117	145	165	205	5.65854	9.05139	-3.39284	6.29719	-2.7542	-0.638647
chr2R_19760315_19760563_+_dCP_twist_center137_to_GATAA	chr2R_19760315_19760563	-	GCATGGATCTTTTATTTTTCGCTTTTTGCACTGCCACTGAAGAGAGGGCGGGGGAGAGCAGGGGCAGGAAAGGGGGGATCTGGTGTGCTCATTCTAACGCTAGATAAATTCCAAAGCGGTATTGACGGAACATAGATAAGAATATATGCATGTATCTATGAGTGTGTGTGCTTGTATACTTAATGCTTCCACGAATCAGGGCCATTCACTTTCTACAAGTTTCTCGGCGGATTTCGCAATCGAATCTGA	chr2R_19760315_19760563_+_dCP_twist_center137	twist	ACATATGT	137	GATAA	AGATAAGA	255	236	227	281	269	329	5.36171	3.92025	1.44146	0.989268	-2.93099	4.37245
chr2R_19760315_19760563_+_dCP_twist_center137_to_AP1	chr2R_19760315_19760563	-	GCATGGATCTTTTATTTTTCGCTTTTTGCACTGCCACTGAAGAGAGGGCGGGGGAGAGCAGGGGCAGGAAAGGGGGGATCTGGTGTGCTCATTCTAACGCTAGATAAATTCCAAAGCGGTATTGACGGAACAATGAGTCACATATATGCATGTATCTATGAGTGTGTGTGCTTGTATACTTAATGCTTCCACGAATCAGGGCCATTCACTTTCTACAAGTTTCTCGGCGGATTTCGCAATCGAATCTGA	chr2R_19760315_19760563_+_dCP_twist_center137	twist	TACATATGT	137	AP1	ATGAGTCAC	66	63	71	89	97	107	5.62398	3.92025	1.70372	0.989268	-2.93099	4.63471
chr2R_19760315_19760563_+_dCP_twist_center137_to_Trl	chr2R_19760315_19760563	-	GCATGGATCTTTTATTTTTCGCTTTTTGCACTGCCACTGAAGAGAGGGCGGGGGAGAGCAGGGGCAGGAAAGGGGGGATCTGGTGTGCTCATTCTAACGCTAGATAAATTCCAAAGCGGTATTGACGGAACATGAGAGAGTATATATGCATGTATCTATGAGTGTGTGTGCTTGTATACTTAATGCTTCCACGAATCAGGGCCATTCACTTTCTACAAGTTTCTCGGCGGATTTCGCAATCGAATCTGA	chr2R_19760315_19760563_+_dCP_twist_center137	twist	ACATATG	137	Trl	GAGAGAG	151	104	122	27	18	22	2.57059	3.92025	-1.34966	0.989268	-2.93099	1.58133
chr2R_19760315_19760563_+_dCP_twist_center137_to_ETS	chr2R_19760315_19760563	-	GCATGGATCTTTTATTTTTCGCTTTTTGCACTGCCACTGAAGAGAGGGCGGGGGAGAGCAGGGGCAGGAAAGGGGGGATCTGGTGTGCTCATTCTAACGCTAGATAAATTCCAAAGCGGTATTGACGGAACAACCGGAAGTATATATGCATGTATCTATGAGTGTGTGTGCTTGTATACTTAATGCTTCCACGAATCAGGGCCATTCACTTTCTACAAGTTTCTCGGCGGATTTCGCAATCGAATCTGA	chr2R_19760315_19760563_+_dCP_twist_center137	twist	TACATATGT	137	ETS	ACCGGAAGT	117	95	113	124	131	134	5.33832	3.92025	1.41806	0.989268	-2.93099	4.34905
chr2R_19760315_19760563_+_dCP_twist_center137_to_SREBP	chr2R_19760315_19760563	-	GCATGGATCTTTTATTTTTCGCTTTTTGCACTGCCACTGAAGAGAGGGCGGGGGAGAGCAGGGGCAGGAAAGGGGGGATCTGGTGTGCTCATTCTAACGCTAGATAAATTCCAAAGCGGTATTGACGGAACAATCACGCGACTATATGCATGTATCTATGAGTGTGTGTGCTTGTATACTTAATGCTTCCACGAATCAGGGCCATTCACTTTCTACAAGTTTCTCGGCGGATTTCGCAATCGAATCTGA	chr2R_19760315_19760563_+_dCP_twist_center137	twist	TACATATGTA	137	SREBP	ATCACGCGAC	58	47	56	126	141	143	6.43117	3.92025	2.51092	0.989268	-2.93099	5.4419
chr2R_19760315_19760563_+_dCP_twist_center137_to_Stat92E	chr2R_19760315_19760563	-	GCATGGATCTTTTATTTTTCGCTTTTTGCACTGCCACTGAAGAGAGGGCGGGGGAGAGCAGGGGCAGGAAAGGGGGGATCTGGTGTGCTCATTCTAACGCTAGATAAATTCCAAAGCGGTATTGACGGAACTTTCCCGGAAATATATGCATGTATCTATGAGTGTGTGTGCTTGTATACTTAATGCTTCCACGAATCAGGGCCATTCACTTTCTACAAGTTTCTCGGCGGATTTCGCAATCGAATCTGA	chr2R_19760315_19760563_+_dCP_twist_center137	twist	ATACATATGTA	137	Stat92E	TTTCCCGGAAA	61	51	60	8	7	2	1.72582	3.92025	-2.19443	0.989268	-2.93099	0.736555
chr2R_19760315_19760563_+_dCP_twist_center137_to_Atf2	chr2R_19760315_19760563	-	GCATGGATCTTTTATTTTTCGCTTTTTGCACTGCCACTGAAGAGAGGGCGGGGGAGAGCAGGGGCAGGAAAGGGGGGATCTGGTGTGCTCATTCTAACGCTAGATAAATTCCAAAGCGGTATTGACGGAACATCACGTCATCTATATGCATGTATCTATGAGTGTGTGTGCTTGTATACTTAATGCTTCCACGAATCAGGGCCATTCACTTTCTACAAGTTTCTCGGCGGATTTCGCAATCGAATCTGA	chr2R_19760315_19760563_+_dCP_twist_center137	twist	ATACATATGTA	137	Atf2	ATCACGTCATC	160	149	142	183	234	247	5.64623	3.92025	1.72597	0.989268	-2.93099	4.65696
chrX_5313281_5313529_+_dCP_twist_center18_to_GATAA	chrX_5313281_5313529	+	GGGCAACTGGCCAGAGATAAGAGGCATTTCCTAATCGTCGAAACCGGGTGACGGGAATTTTTCAGATTACGTTTTATACCCTTTGCTTAGAGTATTAAAACTTGTTGACAAAGCTTGCCACATTTTGCCTAAAATTCTTAATAAATGGATATGCATAAGAGCAGGGAGAAGTGTAGTTTTACACGTATTCGTATCAACTCTTGAATTAAAACGACAAAATGTAAGATAAGGGCACAACAACTTCGCAAT	chrX_5313281_5313529_+_dCP_twist_center18	twist	ACAGCTGT	18	GATAA	AGATAAGA	33	35	24	6	5	8	2.78172	4.12692	-1.3452	1.57552	-2.5514	1.2062
chrX_5313281_5313529_+_dCP_twist_center18_to_AP1	chrX_5313281_5313529	+	GGGCAACTGGCCAATGAGTCACGGCATTTCCTAATCGTCGAAACCGGGTGACGGGAATTTTTCAGATTACGTTTTATACCCTTTGCTTAGAGTATTAAAACTTGTTGACAAAGCTTGCCACATTTTGCCTAAAATTCTTAATAAATGGATATGCATAAGAGCAGGGAGAAGTGTAGTTTTACACGTATTCGTATCAACTCTTGAATTAAAACGACAAAATGTAAGATAAGGGCACAACAACTTCGCAAT	chrX_5313281_5313529_+_dCP_twist_center18	twist	GACAGCTGT	18	AP1	ATGAGTCAC	94	59	66	25	46	24	3.92196	4.12692	-0.204957	1.57552	-2.5514	2.34644
chrX_5313281_5313529_+_dCP_twist_center18_to_Trl	chrX_5313281_5313529	+	GGGCAACTGGCCAGGAGAGAGTGGCATTTCCTAATCGTCGAAACCGGGTGACGGGAATTTTTCAGATTACGTTTTATACCCTTTGCTTAGAGTATTAAAACTTGTTGACAAAGCTTGCCACATTTTGCCTAAAATTCTTAATAAATGGATATGCATAAGAGCAGGGAGAAGTGTAGTTTTACACGTATTCGTATCAACTCTTGAATTAAAACGACAAAATGTAAGATAAGGGCACAACAACTTCGCAAT	chrX_5313281_5313529_+_dCP_twist_center18	twist	ACAGCTG	18	Trl	GAGAGAG	96	86	88	5	1	6	0.558843	4.12692	-3.56807	1.57552	-2.5514	-1.01667
chrX_5313281_5313529_+_dCP_twist_center18_to_ETS	chrX_5313281_5313529	+	GGGCAACTGGCCAACCGGAAGTGGCATTTCCTAATCGTCGAAACCGGGTGACGGGAATTTTTCAGATTACGTTTTATACCCTTTGCTTAGAGTATTAAAACTTGTTGACAAAGCTTGCCACATTTTGCCTAAAATTCTTAATAAATGGATATGCATAAGAGCAGGGAGAAGTGTAGTTTTACACGTATTCGTATCAACTCTTGAATTAAAACGACAAAATGTAAGATAAGGGCACAACAACTTCGCAAT	chrX_5313281_5313529_+_dCP_twist_center18	twist	GACAGCTGT	18	ETS	ACCGGAAGT	52	36	47	38	20	31	4.45075	4.12692	0.323836	1.57552	-2.5514	2.87524
chrX_5313281_5313529_+_dCP_twist_center18_to_SREBP	chrX_5313281_5313529	+	GGGCAACTGGCCAATCACGCGACGCATTTCCTAATCGTCGAAACCGGGTGACGGGAATTTTTCAGATTACGTTTTATACCCTTTGCTTAGAGTATTAAAACTTGTTGACAAAGCTTGCCACATTTTGCCTAAAATTCTTAATAAATGGATATGCATAAGAGCAGGGAGAAGTGTAGTTTTACACGTATTCGTATCAACTCTTGAATTAAAACGACAAAATGTAAGATAAGGGCACAACAACTTCGCAAT	chrX_5313281_5313529_+_dCP_twist_center18	twist	GACAGCTGTG	18	SREBP	ATCACGCGAC	26	29	19	19	23	41	5.22708	4.12692	1.10016	1.57552	-2.5514	3.65156
chrX_5313281_5313529_+_dCP_twist_center18_to_Stat92E	chrX_5313281_5313529	+	GGGCAACTGGCCTTTCCCGGAAAGCATTTCCTAATCGTCGAAACCGGGTGACGGGAATTTTTCAGATTACGTTTTATACCCTTTGCTTAGAGTATTAAAACTTGTTGACAAAGCTTGCCACATTTTGCCTAAAATTCTTAATAAATGGATATGCATAAGAGCAGGGAGAAGTGTAGTTTTACACGTATTCGTATCAACTCTTGAATTAAAACGACAAAATGTAAGATAAGGGCACAACAACTTCGCAAT	chrX_5313281_5313529_+_dCP_twist_center18	twist	AGACAGCTGTG	18	Stat92E	TTTCCCGGAAA	33	23	21	4	2	0	1.60468	4.12692	-2.52224	1.57552	-2.5514	0.0291634
chrX_5313281_5313529_+_dCP_twist_center18_to_Atf2	chrX_5313281_5313529	+	GGGCAACTGGCCATCACGTCATCGCATTTCCTAATCGTCGAAACCGGGTGACGGGAATTTTTCAGATTACGTTTTATACCCTTTGCTTAGAGTATTAAAACTTGTTGACAAAGCTTGCCACATTTTGCCTAAAATTCTTAATAAATGGATATGCATAAGAGCAGGGAGAAGTGTAGTTTTACACGTATTCGTATCAACTCTTGAATTAAAACGACAAAATGTAAGATAAGGGCACAACAACTTCGCAAT	chrX_5313281_5313529_+_dCP_twist_center18	twist	AGACAGCTGTG	18	Atf2	ATCACGTCATC	38	33	22	20	9	19	4.096	4.12692	-0.0309133	1.57552	-2.5514	2.52049
chr3R_26559775_26560023_+_dCP_twist_center167_to_GATAA	chr3R_26559775_26560023	+	GAACAAACACACATGGTGATTGGACTTCAAAAGTTAGCTTGAACATATCTCTAGTACTTACTAATTGATGTATTGTATTATGCAAAAACTAATGAAGCTGCCCTGCTGATAAAACAGCAGTGCATTACTCATCCATGGCGAAATTCGTATTTATTTTTTGTAAAGATAAGAGAAATGAGTTCAACTTGTTTCCCCCAAATCGACGGCACTTCCTTCCCCGCTCCACCCGCTTCATTTCGGGAGGTAAAT	chr3R_26559775_26560023_+_dCP_twist_center167	twist	ACACTTGT	167	GATAA	AGATAAGA	54	44	52	37	64	84	5.38973	5.49272	-0.102994	2.90857	-2.58416	2.48116
chr3R_26559775_26560023_+_dCP_twist_center167_to_AP1	chr3R_26559775_26560023	+	GAACAAACACACATGGTGATTGGACTTCAAAAGTTAGCTTGAACATATCTCTAGTACTTACTAATTGATGTATTGTATTATGCAAAAACTAATGAAGCTGCCCTGCTGATAAAACAGCAGTGCATTACTCATCCATGGCGAAATTCGTATTTATTTTTTGTAATGAGTCACGAAATGAGTTCAACTTGTTTCCCCCAAATCGACGGCACTTCCTTCCCCGCTCCACCCGCTTCATTTCGGGAGGTAAAT	chr3R_26559775_26560023_+_dCP_twist_center167	twist	AACACTTGT	167	AP1	ATGAGTCAC	86	50	62	71	109	121	5.70842	5.49272	0.215699	2.90857	-2.58416	2.79985
chr3R_26559775_26560023_+_dCP_twist_center167_to_Trl	chr3R_26559775_26560023	+	GAACAAACACACATGGTGATTGGACTTCAAAAGTTAGCTTGAACATATCTCTAGTACTTACTAATTGATGTATTGTATTATGCAAAAACTAATGAAGCTGCCCTGCTGATAAAACAGCAGTGCATTACTCATCCATGGCGAAATTCGTATTTATTTTTTGTAAGAGAGAGTGAAATGAGTTCAACTTGTTTCCCCCAAATCGACGGCACTTCCTTCCCCGCTCCACCCGCTTCATTTCGGGAGGTAAAT	chr3R_26559775_26560023_+_dCP_twist_center167	twist	ACACTTG	167	Trl	GAGAGAG	94	78	82	9	9	8	1.77614	5.49272	-3.71658	2.90857	-2.58416	-1.13242
chr3R_26559775_26560023_+_dCP_twist_center167_to_ETS	chr3R_26559775_26560023	+	GAACAAACACACATGGTGATTGGACTTCAAAAGTTAGCTTGAACATATCTCTAGTACTTACTAATTGATGTATTGTATTATGCAAAAACTAATGAAGCTGCCCTGCTGATAAAACAGCAGTGCATTACTCATCCATGGCGAAATTCGTATTTATTTTTTGTAACCGGAAGTGAAATGAGTTCAACTTGTTTCCCCCAAATCGACGGCACTTCCTTCCCCGCTCCACCCGCTTCATTTCGGGAGGTAAAT	chr3R_26559775_26560023_+_dCP_twist_center167	twist	AACACTTGT	167	ETS	ACCGGAAGT	73	60	68	54	75	80	5.14267	5.49272	-0.350054	2.90857	-2.58416	2.2341
chr3R_26559775_26560023_+_dCP_twist_center167_to_SREBP	chr3R_26559775_26560023	+	GAACAAACACACATGGTGATTGGACTTCAAAAGTTAGCTTGAACATATCTCTAGTACTTACTAATTGATGTATTGTATTATGCAAAAACTAATGAAGCTGCCCTGCTGATAAAACAGCAGTGCATTACTCATCCATGGCGAAATTCGTATTTATTTTTTGTAATCACGCGACAAATGAGTTCAACTTGTTTCCCCCAAATCGACGGCACTTCCTTCCCCGCTCCACCCGCTTCATTTCGGGAGGTAAAT	chr3R_26559775_26560023_+_dCP_twist_center167	twist	AACACTTGTG	167	SREBP	ATCACGCGAC	74	53	50	101	130	159	6.22961	5.49272	0.736884	2.90857	-2.58416	3.32104
chr3R_26559775_26560023_+_dCP_twist_center167_to_Stat92E	chr3R_26559775_26560023	+	GAACAAACACACATGGTGATTGGACTTCAAAAGTTAGCTTGAACATATCTCTAGTACTTACTAATTGATGTATTGTATTATGCAAAAACTAATGAAGCTGCCCTGCTGATAAAACAGCAGTGCATTACTCATCCATGGCGAAATTCGTATTTATTTTTTGTTTTCCCGGAAAAAATGAGTTCAACTTGTTTCCCCCAAATCGACGGCACTTCCTTCCCCGCTCCACCCGCTTCATTTCGGGAGGTAAAT	chr3R_26559775_26560023_+_dCP_twist_center167	twist	AAACACTTGTG	167	Stat92E	TTTCCCGGAAA	73	57	71	35	46	41	4.3633	5.49272	-1.12942	2.90857	-2.58416	1.45474
chr3R_26559775_26560023_+_dCP_twist_center167_to_Atf2	chr3R_26559775_26560023	+	GAACAAACACACATGGTGATTGGACTTCAAAAGTTAGCTTGAACATATCTCTAGTACTTACTAATTGATGTATTGTATTATGCAAAAACTAATGAAGCTGCCCTGCTGATAAAACAGCAGTGCATTACTCATCCATGGCGAAATTCGTATTTATTTTTTGTATCACGTCATCAAATGAGTTCAACTTGTTTCCCCCAAATCGACGGCACTTCCTTCCCCGCTCCACCCGCTTCATTTCGGGAGGTAAAT	chr3R_26559775_26560023_+_dCP_twist_center167	twist	AAACACTTGTG	167	Atf2	ATCACGTCATC	49	35	38	37	48	42	5.1463	5.49272	-0.346421	2.90857	-2.58416	2.23773
chrX_8868383_8868631_+_dCP_twist_center32_to_GATAA	chrX_8868383_8868631	-	AATTCATTGGGGTTGATAGGCCGAAACAAGATAAGATGTCAGCAGTCCCACTGATCGGATGGTCTGTTTCAAGGAACGAAAGACACGTCATGCCAACAACGTTTACACGCTTTGAAAGTACACTCAGAAAAAGAACTCATCAGTAGTTCTTTGAATACTCTTAAAAGATAGATTTGTTGCTATACTATTAACTTACACTTCATACTGCATATTTAATACATTTAATACATAATCATCATGGGCATTTCT	chrX_8868383_8868631_+_dCP_twist_center32	twist	ACATCTGT	32	GATAA	AGATAAGA	17	22	22	82	92	132	7.39035	6.59985	0.790501	4.08225	-2.5176	3.3081
chrX_8868383_8868631_+_dCP_twist_center32_to_AP1	chrX_8868383_8868631	-	AATTCATTGGGGTTGATAGGCCGAAACATGAGTCACTGTCAGCAGTCCCACTGATCGGATGGTCTGTTTCAAGGAACGAAAGACACGTCATGCCAACAACGTTTACACGCTTTGAAAGTACACTCAGAAAAAGAACTCATCAGTAGTTCTTTGAATACTCTTAAAAGATAGATTTGTTGCTATACTATTAACTTACACTTCATACTGCATATTTAATACATTTAATACATAATCATCATGGGCATTTCT	chrX_8868383_8868631_+_dCP_twist_center32	twist	AACATCTGT	32	AP1	ATGAGTCAC	54	45	54	200	287	286	7.4346	6.59985	0.834747	4.08225	-2.5176	3.35234
chrX_8868383_8868631_+_dCP_twist_center32_to_Trl	chrX_8868383_8868631	-	AATTCATTGGGGTTGATAGGCCGAAACAGAGAGAGTTGTCAGCAGTCCCACTGATCGGATGGTCTGTTTCAAGGAACGAAAGACACGTCATGCCAACAACGTTTACACGCTTTGAAAGTACACTCAGAAAAAGAACTCATCAGTAGTTCTTTGAATACTCTTAAAAGATAGATTTGTTGCTATACTATTAACTTACACTTCATACTGCATATTTAATACATTTAATACATAATCATCATGGGCATTTCT	chrX_8868383_8868631_+_dCP_twist_center32	twist	ACATCTG	32	Trl	GAGAGAG	41	45	25	18	17	18	3.99889	6.59985	-2.60095	4.08225	-2.5176	-0.0833592
chrX_8868383_8868631_+_dCP_twist_center32_to_ETS	chrX_8868383_8868631	-	AATTCATTGGGGTTGATAGGCCGAAACACCGGAAGTTGTCAGCAGTCCCACTGATCGGATGGTCTGTTTCAAGGAACGAAAGACACGTCATGCCAACAACGTTTACACGCTTTGAAAGTACACTCAGAAAAAGAACTCATCAGTAGTTCTTTGAATACTCTTAAAAGATAGATTTGTTGCTATACTATTAACTTACACTTCATACTGCATATTTAATACATTTAATACATAATCATCATGGGCATTTCT	chrX_8868383_8868631_+_dCP_twist_center32	twist	AACATCTGT	32	ETS	ACCGGAAGT	30	33	25	101	109	110	6.94012	6.59985	0.340272	4.08225	-2.5176	2.85787
chrX_8868383_8868631_+_dCP_twist_center32_to_SREBP	chrX_8868383_8868631	-	AATTCATTGGGGTTGATAGGCCGAAACATCACGCGACGTCAGCAGTCCCACTGATCGGATGGTCTGTTTCAAGGAACGAAAGACACGTCATGCCAACAACGTTTACACGCTTTGAAAGTACACTCAGAAAAAGAACTCATCAGTAGTTCTTTGAATACTCTTAAAAGATAGATTTGTTGCTATACTATTAACTTACACTTCATACTGCATATTTAATACATTTAATACATAATCATCATGGGCATTTCT	chrX_8868383_8868631_+_dCP_twist_center32	twist	AACATCTGTT	32	SREBP	ATCACGCGAC	53	31	45	248	344	428	8.07832	6.59985	1.47847	4.08225	-2.5176	3.99607
chrX_8868383_8868631_+_dCP_twist_center32_to_Stat92E	chrX_8868383_8868631	-	AATTCATTGGGGTTGATAGGCCGAAATTTCCCGGAAAGTCAGCAGTCCCACTGATCGGATGGTCTGTTTCAAGGAACGAAAGACACGTCATGCCAACAACGTTTACACGCTTTGAAAGTACACTCAGAAAAAGAACTCATCAGTAGTTCTTTGAATACTCTTAAAAGATAGATTTGTTGCTATACTATTAACTTACACTTCATACTGCATATTTAATACATTTAATACATAATCATCATGGGCATTTCT	chrX_8868383_8868631_+_dCP_twist_center32	twist	CAACATCTGTT	32	Stat92E	TTTCCCGGAAA	52	49	52	36	65	64	5.20441	6.59985	-1.39543	4.08225	-2.5176	1.12216
chrX_8868383_8868631_+_dCP_twist_center32_to_Atf2	chrX_8868383_8868631	-	AATTCATTGGGGTTGATAGGCCGAAAATCACGTCATCGTCAGCAGTCCCACTGATCGGATGGTCTGTTTCAAGGAACGAAAGACACGTCATGCCAACAACGTTTACACGCTTTGAAAGTACACTCAGAAAAAGAACTCATCAGTAGTTCTTTGAATACTCTTAAAAGATAGATTTGTTGCTATACTATTAACTTACACTTCATACTGCATATTTAATACATTTAATACATAATCATCATGGGCATTTCT	chrX_8868383_8868631_+_dCP_twist_center32	twist	CAACATCTGTT	32	Atf2	ATCACGTCATC	16	27	19	86	137	137	7.62623	6.59985	1.02639	4.08225	-2.5176	3.54398
chr3L_20202021_20202269_+_dCP_twist_center104_to_GATAA	chr3L_20202021_20202269	-	GATTATATTATGGCTCGGATGGTTCACAAATGAGTCAACTTTTAATCGTACAACTAAGCTTTTCGAAATAATCTTTTTATACCTAAATACATTTGAAAATAGATAAGATTGTATTGTGATCAATTCCACGAAATCTAAACAAAGAGCTGATCTATAATTTGTATGGGACTTGGGCCTGATAACAGCACTACTTATACTTATGAGGAGCTGCTCACGACACCGGGACCGCAATGGTGGTGCTAGTGATGG	chr3L_20202021_20202269_+_dCP_twist_center104	twist	TCAGATGT	104	GATAA	AGATAAGA	51	46	39	47	45	42	5.05085	5.15312	-0.102268	3.29297	-1.86015	1.75789
chr3L_20202021_20202269_+_dCP_twist_center104_to_AP1	chr3L_20202021_20202269	-	GATTATATTATGGCTCGGATGGTTCACAAATGAGTCAACTTTTAATCGTACAACTAAGCTTTTCGAAATAATCTTTTTATACCTAAATACATTTGAAAAATGAGTCACTTGTATTGTGATCAATTCCACGAAATCTAAACAAAGAGCTGATCTATAATTTGTATGGGACTTGGGCCTGATAACAGCACTACTTATACTTATGAGGAGCTGCTCACGACACCGGGACCGCAATGGTGGTGCTAGTGATGG	chr3L_20202021_20202269_+_dCP_twist_center104	twist	TTCAGATGT	104	AP1	ATGAGTCAC	122	122	110	282	290	304	6.3843	5.15312	1.23118	3.29297	-1.86015	3.09133
chr3L_20202021_20202269_+_dCP_twist_center104_to_Trl	chr3L_20202021_20202269	-	GATTATATTATGGCTCGGATGGTTCACAAATGAGTCAACTTTTAATCGTACAACTAAGCTTTTCGAAATAATCTTTTTATACCTAAATACATTTGAAAATGAGAGAGTTTGTATTGTGATCAATTCCACGAAATCTAAACAAAGAGCTGATCTATAATTTGTATGGGACTTGGGCCTGATAACAGCACTACTTATACTTATGAGGAGCTGCTCACGACACCGGGACCGCAATGGTGGTGCTAGTGATGG	chr3L_20202021_20202269_+_dCP_twist_center104	twist	TCAGATG	104	Trl	GAGAGAG	52	41	45	51	45	58	5.22298	5.15312	0.0698557	3.29297	-1.86015	1.93001
chr3L_20202021_20202269_+_dCP_twist_center104_to_ETS	chr3L_20202021_20202269	-	GATTATATTATGGCTCGGATGGTTCACAAATGAGTCAACTTTTAATCGTACAACTAAGCTTTTCGAAATAATCTTTTTATACCTAAATACATTTGAAAAACCGGAAGTTTGTATTGTGATCAATTCCACGAAATCTAAACAAAGAGCTGATCTATAATTTGTATGGGACTTGGGCCTGATAACAGCACTACTTATACTTATGAGGAGCTGCTCACGACACCGGGACCGCAATGGTGGTGCTAGTGATGG	chr3L_20202021_20202269_+_dCP_twist_center104	twist	TTCAGATGT	104	ETS	ACCGGAAGT	92	91	71	87	73	86	5.01763	5.15312	-0.13549	3.29297	-1.86015	1.72466
chr3L_20202021_20202269_+_dCP_twist_center104_to_SREBP	chr3L_20202021_20202269	-	GATTATATTATGGCTCGGATGGTTCACAAATGAGTCAACTTTTAATCGTACAACTAAGCTTTTCGAAATAATCTTTTTATACCTAAATACATTTGAAAAATCACGCGACTGTATTGTGATCAATTCCACGAAATCTAAACAAAGAGCTGATCTATAATTTGTATGGGACTTGGGCCTGATAACAGCACTACTTATACTTATGAGGAGCTGCTCACGACACCGGGACCGCAATGGTGGTGCTAGTGATGG	chr3L_20202021_20202269_+_dCP_twist_center104	twist	TTCAGATGTT	104	SREBP	ATCACGCGAC	50	47	46	145	166	156	6.79287	5.15312	1.63976	3.29297	-1.86015	3.49991
chr3L_20202021_20202269_+_dCP_twist_center104_to_Stat92E	chr3L_20202021_20202269	-	GATTATATTATGGCTCGGATGGTTCACAAATGAGTCAACTTTTAATCGTACAACTAAGCTTTTCGAAATAATCTTTTTATACCTAAATACATTTGAAATTTCCCGGAAATGTATTGTGATCAATTCCACGAAATCTAAACAAAGAGCTGATCTATAATTTGTATGGGACTTGGGCCTGATAACAGCACTACTTATACTTATGAGGAGCTGCTCACGACACCGGGACCGCAATGGTGGTGCTAGTGATGG	chr3L_20202021_20202269_+_dCP_twist_center104	twist	ATTCAGATGTT	104	Stat92E	TTTCCCGGAAA	76	44	47	187	165	187	6.77081	5.15312	1.61769	3.29297	-1.86015	3.47785
chr3L_20202021_20202269_+_dCP_twist_center104_to_Atf2	chr3L_20202021_20202269	-	GATTATATTATGGCTCGGATGGTTCACAAATGAGTCAACTTTTAATCGTACAACTAAGCTTTTCGAAATAATCTTTTTATACCTAAATACATTTGAAAATCACGTCATCTGTATTGTGATCAATTCCACGAAATCTAAACAAAGAGCTGATCTATAATTTGTATGGGACTTGGGCCTGATAACAGCACTACTTATACTTATGAGGAGCTGCTCACGACACCGGGACCGCAATGGTGGTGCTAGTGATGG	chr3L_20202021_20202269_+_dCP_twist_center104	twist	ATTCAGATGTT	104	Atf2	ATCACGTCATC	159	135	160	275	261	336	6.00961	5.15312	0.856487	3.29297	-1.86015	2.71664
chr3L_1583232_1583480_+_dCP_twist_center61_to_GATAA	chr3L_1583232_1583480	-	CTGCAAACGAAAGTCGCGGCAATAGTAAGTTAAATTATTATATTTCATTATTATAAGAGATAAGATTGCTGTTGAATCATCAGCCATCGGAAGCAGCGCATCTTCCAGCCCACAAAAAAAAAGACTCAAAAAAAAGACTCAACCGAGGGTGAGTTCATTGAAAGTGAGTCATCATTCGACGTCCACAAACAAGTATTCAGCAATTTCAAATTTGCGAATGAATGTCGGGGGCATGCCCCACCAATAGCA	chr3L_1583232_1583480_+_dCP_twist_center61	twist	GCAAATGT	61	GATAA	AGATAAGA	42	39	47	109	83	122	6.34844	5.45391	0.894526	2.86862	-2.58529	3.47982
chr3L_1583232_1583480_+_dCP_twist_center61_to_AP1	chr3L_1583232_1583480	-	CTGCAAACGAAAGTCGCGGCAATAGTAAGTTAAATTATTATATTTCATTATTATAAATGAGTCACTTGCTGTTGAATCATCAGCCATCGGAAGCAGCGCATCTTCCAGCCCACAAAAAAAAAGACTCAAAAAAAAGACTCAACCGAGGGTGAGTTCATTGAAAGTGAGTCATCATTCGACGTCCACAAACAAGTATTCAGCAATTTCAAATTTGCGAATGAATGTCGGGGGCATGCCCCACCAATAGCA	chr3L_1583232_1583480_+_dCP_twist_center61	twist	GGCAAATGT	61	AP1	ATGAGTCAC	24	20	22	92	107	115	7.33171	5.45391	1.8778	2.86862	-2.58529	4.46309
chr3L_1583232_1583480_+_dCP_twist_center61_to_Trl	chr3L_1583232_1583480	-	CTGCAAACGAAAGTCGCGGCAATAGTAAGTTAAATTATTATATTTCATTATTATAAGGAGAGAGTTTGCTGTTGAATCATCAGCCATCGGAAGCAGCGCATCTTCCAGCCCACAAAAAAAAAGACTCAAAAAAAAGACTCAACCGAGGGTGAGTTCATTGAAAGTGAGTCATCATTCGACGTCCACAAACAAGTATTCAGCAATTTCAAATTTGCGAATGAATGTCGGGGGCATGCCCCACCAATAGCA	chr3L_1583232_1583480_+_dCP_twist_center61	twist	GCAAATG	61	Trl	GAGAGAG	27	17	17	12	7	9	3.93846	5.45391	-1.51545	2.86862	-2.58529	1.06984
chr3L_1583232_1583480_+_dCP_twist_center61_to_ETS	chr3L_1583232_1583480	-	CTGCAAACGAAAGTCGCGGCAATAGTAAGTTAAATTATTATATTTCATTATTATAAACCGGAAGTTTGCTGTTGAATCATCAGCCATCGGAAGCAGCGCATCTTCCAGCCCACAAAAAAAAAGACTCAAAAAAAAGACTCAACCGAGGGTGAGTTCATTGAAAGTGAGTCATCATTCGACGTCCACAAACAAGTATTCAGCAATTTCAAATTTGCGAATGAATGTCGGGGGCATGCCCCACCAATAGCA	chr3L_1583232_1583480_+_dCP_twist_center61	twist	GGCAAATGT	61	ETS	ACCGGAAGT	45	32	27	303	308	358	8.30286	5.45391	2.84895	2.86862	-2.58529	5.43425
chr3L_1583232_1583480_+_dCP_twist_center61_to_SREBP	chr3L_1583232_1583480	-	CTGCAAACGAAAGTCGCGGCAATAGTAAGTTAAATTATTATATTTCATTATTATAAATCACGCGACTGCTGTTGAATCATCAGCCATCGGAAGCAGCGCATCTTCCAGCCCACAAAAAAAAAGACTCAAAAAAAAGACTCAACCGAGGGTGAGTTCATTGAAAGTGAGTCATCATTCGACGTCCACAAACAAGTATTCAGCAATTTCAAATTTGCGAATGAATGTCGGGGGCATGCCCCACCAATAGCA	chr3L_1583232_1583480_+_dCP_twist_center61	twist	GGCAAATGTT	61	SREBP	ATCACGCGAC	26	16	23	395	476	563	9.5519	5.45391	4.09799	2.86862	-2.58529	6.68329
chr3L_1583232_1583480_+_dCP_twist_center61_to_Stat92E	chr3L_1583232_1583480	-	CTGCAAACGAAAGTCGCGGCAATAGTAAGTTAAATTATTATATTTCATTATTATATTTCCCGGAAATGCTGTTGAATCATCAGCCATCGGAAGCAGCGCATCTTCCAGCCCACAAAAAAAAAGACTCAAAAAAAAGACTCAACCGAGGGTGAGTTCATTGAAAGTGAGTCATCATTCGACGTCCACAAACAAGTATTCAGCAATTTCAAATTTGCGAATGAATGTCGGGGGCATGCCCCACCAATAGCA	chr3L_1583232_1583480_+_dCP_twist_center61	twist	AGGCAAATGTT	61	Stat92E	TTTCCCGGAAA	48	48	48	603	641	782	8.88886	5.45391	3.43495	2.86862	-2.58529	6.02024
chr3L_1583232_1583480_+_dCP_twist_center61_to_Atf2	chr3L_1583232_1583480	-	CTGCAAACGAAAGTCGCGGCAATAGTAAGTTAAATTATTATATTTCATTATTATAATCACGTCATCTGCTGTTGAATCATCAGCCATCGGAAGCAGCGCATCTTCCAGCCCACAAAAAAAAAGACTCAAAAAAAAGACTCAACCGAGGGTGAGTTCATTGAAAGTGAGTCATCATTCGACGTCCACAAACAAGTATTCAGCAATTTCAAATTTGCGAATGAATGTCGGGGGCATGCCCCACCAATAGCA	chr3L_1583232_1583480_+_dCP_twist_center61	twist	AGGCAAATGTT	61	Atf2	ATCACGTCATC	26	20	25	23	25	21	5.03186	5.45391	-0.422047	2.86862	-2.58529	2.16325
chr3L_17943581_17943829_+_dCP_twist_center152_to_GATAA	chr3L_17943581_17943829	+	GGCACACACGCTGCCCAGACGCCTTAACCAGCTAGAGCCCCTCCCGGCCAACCCCTTTGACTACAACAACGCTGATTTGATTATTTCGGCAAATTCATTTCGCGACTCTTATCTTATCGCCTCAAGGTCACGGGCAAAATTCCAAAACAGATAAGACCAGCGCCAACAAAAGCCTAGGACAGACAGCCGCGACATTGAAAATAATCGCTATTCTCGGCGAGCACAAAAAAACGTGGCTGTGTGCGTGAT	chr3L_17943581_17943829_+_dCP_twist_center152	twist	ACACTTGC	152	GATAA	AGATAAGA	77	51	62	25	16	19	3.39916	4.73144	-1.33228	2.73455	-1.99689	0.66461
chr3L_17943581_17943829_+_dCP_twist_center152_to_AP1	chr3L_17943581_17943829	+	GGCACACACGCTGCCCAGACGCCTTAACCAGCTAGAGCCCCTCCCGGCCAACCCCTTTGACTACAACAACGCTGATTTGATTATTTCGGCAAATTCATTTCGCGACTCTTATCTTATCGCCTCAAGGTCACGGGCAAAATTCCAAAAATGAGTCACCCAGCGCCAACAAAAGCCTAGGACAGACAGCCGCGACATTGAAAATAATCGCTATTCTCGGCGAGCACAAAAAAACGTGGCTGTGTGCGTGAT	chr3L_17943581_17943829_+_dCP_twist_center152	twist	CACACTTGC	152	AP1	ATGAGTCAC	272	211	233	176	136	177	4.51258	4.73144	-0.218857	2.73455	-1.99689	1.77804
chr3L_17943581_17943829_+_dCP_twist_center152_to_Trl	chr3L_17943581_17943829	+	GGCACACACGCTGCCCAGACGCCTTAACCAGCTAGAGCCCCTCCCGGCCAACCCCTTTGACTACAACAACGCTGATTTGATTATTTCGGCAAATTCATTTCGCGACTCTTATCTTATCGCCTCAAGGTCACGGGCAAAATTCCAAAACGAGAGAGCCCAGCGCCAACAAAAGCCTAGGACAGACAGCCGCGACATTGAAAATAATCGCTATTCTCGGCGAGCACAAAAAAACGTGGCTGTGTGCGTGAT	chr3L_17943581_17943829_+_dCP_twist_center152	twist	ACACTTG	152	Trl	GAGAGAG	39	46	48	48	44	43	5.084	4.73144	0.352557	2.73455	-1.99689	2.34945
chr3L_17943581_17943829_+_dCP_twist_center152_to_ETS	chr3L_17943581_17943829	+	GGCACACACGCTGCCCAGACGCCTTAACCAGCTAGAGCCCCTCCCGGCCAACCCCTTTGACTACAACAACGCTGATTTGATTATTTCGGCAAATTCATTTCGCGACTCTTATCTTATCGCCTCAAGGTCACGGGCAAAATTCCAAAAACCGGAAGTCCAGCGCCAACAAAAGCCTAGGACAGACAGCCGCGACATTGAAAATAATCGCTATTCTCGGCGAGCACAAAAAAACGTGGCTGTGTGCGTGAT	chr3L_17943581_17943829_+_dCP_twist_center152	twist	CACACTTGC	152	ETS	ACCGGAAGT	55	54	40	178	160	206	6.93485	4.73144	2.20341	2.73455	-1.99689	4.2003
chr3L_17943581_17943829_+_dCP_twist_center152_to_SREBP	chr3L_17943581_17943829	+	GGCACACACGCTGCCCAGACGCCTTAACCAGCTAGAGCCCCTCCCGGCCAACCCCTTTGACTACAACAACGCTGATTTGATTATTTCGGCAAATTCATTTCGCGACTCTTATCTTATCGCCTCAAGGTCACGGGCAAAATTCCAAAAATCACGCGACCAGCGCCAACAAAAGCCTAGGACAGACAGCCGCGACATTGAAAATAATCGCTATTCTCGGCGAGCACAAAAAAACGTGGCTGTGTGCGTGAT	chr3L_17943581_17943829_+_dCP_twist_center152	twist	CACACTTGCC	152	SREBP	ATCACGCGAC	82	84	74	207	142	183	6.20117	4.73144	1.46973	2.73455	-1.99689	3.46662
chr3L_17943581_17943829_+_dCP_twist_center152_to_Stat92E	chr3L_17943581_17943829	+	GGCACACACGCTGCCCAGACGCCTTAACCAGCTAGAGCCCCTCCCGGCCAACCCCTTTGACTACAACAACGCTGATTTGATTATTTCGGCAAATTCATTTCGCGACTCTTATCTTATCGCCTCAAGGTCACGGGCAAAATTCCAAATTTCCCGGAAACAGCGCCAACAAAAGCCTAGGACAGACAGCCGCGACATTGAAAATAATCGCTATTCTCGGCGAGCACAAAAAAACGTGGCTGTGTGCGTGAT	chr3L_17943581_17943829_+_dCP_twist_center152	twist	ACACACTTGCC	152	Stat92E	TTTCCCGGAAA	191	159	159	773	576	767	7.11512	4.73144	2.38368	2.73455	-1.99689	4.38057
chr3L_17943581_17943829_+_dCP_twist_center152_to_Atf2	chr3L_17943581_17943829	+	GGCACACACGCTGCCCAGACGCCTTAACCAGCTAGAGCCCCTCCCGGCCAACCCCTTTGACTACAACAACGCTGATTTGATTATTTCGGCAAATTCATTTCGCGACTCTTATCTTATCGCCTCAAGGTCACGGGCAAAATTCCAAAATCACGTCATCCAGCGCCAACAAAAGCCTAGGACAGACAGCCGCGACATTGAAAATAATCGCTATTCTCGGCGAGCACAAAAAAACGTGGCTGTGTGCGTGAT	chr3L_17943581_17943829_+_dCP_twist_center152	twist	ACACACTTGCC	152	Atf2	ATCACGTCATC	141	121	125	166	137	191	5.41312	4.73144	0.681675	2.73455	-1.99689	2.67857
chr2L_5987074_5987322_+_dCP_twist_center8_to_GATAA	chr2L_5987074_5987322	+	GGTTAGATAAGAATTTTCACCCCGCAAACTTGTGAATCAGTTTTCATGTTGTTCCCTTTTGCCGGGCATCGAGTGCGTCTTAATTGCGCCGATTAGATAAGGTTGTAGTTATATGTGTATCCGAATAGGCGCTCAATTGGTCACGTAGCTCAGTGATTTGCCACTCGACTTCTCGGCTGCAAGTCGCGTTCAGTTGAGTCACTGCTTCGCCTTCCGCAAAAAGTTCCCGAAATATTATTCAAACTAATT	chr2L_5987074_5987322_+_dCP_twist_center8	twist	TCATGTGA	8	GATAA	AGATAAGA	301	302	315	609	597	723	6.13959	5.18967	0.949911	3.12341	-2.06627	3.01618
chr2L_5987074_5987322_+_dCP_twist_center8_to_AP1	chr2L_5987074_5987322	+	GGTATGAGTCACATTTTCACCCCGCAAACTTGTGAATCAGTTTTCATGTTGTTCCCTTTTGCCGGGCATCGAGTGCGTCTTAATTGCGCCGATTAGATAAGGTTGTAGTTATATGTGTATCCGAATAGGCGCTCAATTGGTCACGTAGCTCAGTGATTTGCCACTCGACTTCTCGGCTGCAAGTCGCGTTCAGTTGAGTCACTGCTTCGCCTTCCGCAAAAAGTTCCCGAAATATTATTCAAACTAATT	chr2L_5987074_5987322_+_dCP_twist_center8	twist	TTCATGTGA	8	AP1	ATGAGTCAC	144	119	105	734	849	969	7.88235	5.18967	2.69267	3.12341	-2.06627	4.75894
chr2L_5987074_5987322_+_dCP_twist_center8_to_Trl	chr2L_5987074_5987322	+	GGTTGAGAGAGAATTTTCACCCCGCAAACTTGTGAATCAGTTTTCATGTTGTTCCCTTTTGCCGGGCATCGAGTGCGTCTTAATTGCGCCGATTAGATAAGGTTGTAGTTATATGTGTATCCGAATAGGCGCTCAATTGGTCACGTAGCTCAGTGATTTGCCACTCGACTTCTCGGCTGCAAGTCGCGTTCAGTTGAGTCACTGCTTCGCCTTCCGCAAAAAGTTCCCGAAATATTATTCAAACTAATT	chr2L_5987074_5987322_+_dCP_twist_center8	twist	TCATGTG	8	Trl	GAGAGAG	237	218	211	102	114	113	4.06239	5.18967	-1.12729	3.12341	-2.06627	0.938983
chr2L_5987074_5987322_+_dCP_twist_center8_to_ETS	chr2L_5987074_5987322	+	GGTACCGGAAGTATTTTCACCCCGCAAACTTGTGAATCAGTTTTCATGTTGTTCCCTTTTGCCGGGCATCGAGTGCGTCTTAATTGCGCCGATTAGATAAGGTTGTAGTTATATGTGTATCCGAATAGGCGCTCAATTGGTCACGTAGCTCAGTGATTTGCCACTCGACTTCTCGGCTGCAAGTCGCGTTCAGTTGAGTCACTGCTTCGCCTTCCGCAAAAAGTTCCCGAAATATTATTCAAACTAATT	chr2L_5987074_5987322_+_dCP_twist_center8	twist	TTCATGTGA	8	ETS	ACCGGAAGT	382	370	295	509	490	573	5.66003	5.18967	0.470356	3.12341	-2.06627	2.53662
chr2L_5987074_5987322_+_dCP_twist_center8_to_SREBP	chr2L_5987074_5987322	+	GGTATCACGCGACTTTTCACCCCGCAAACTTGTGAATCAGTTTTCATGTTGTTCCCTTTTGCCGGGCATCGAGTGCGTCTTAATTGCGCCGATTAGATAAGGTTGTAGTTATATGTGTATCCGAATAGGCGCTCAATTGGTCACGTAGCTCAGTGATTTGCCACTCGACTTCTCGGCTGCAAGTCGCGTTCAGTTGAGTCACTGCTTCGCCTTCCGCAAAAAGTTCCCGAAATATTATTCAAACTAATT	chr2L_5987074_5987322_+_dCP_twist_center8	twist	TTCATGTGAA	8	SREBP	ATCACGCGAC	261	248	207	803	940	1088	7.06754	5.18967	1.87786	3.12341	-2.06627	3.94413
chr2L_5987074_5987322_+_dCP_twist_center8_to_Stat92E	chr2L_5987074_5987322	+	GGTTTCCCGGAAATTTTCACCCCGCAAACTTGTGAATCAGTTTTCATGTTGTTCCCTTTTGCCGGGCATCGAGTGCGTCTTAATTGCGCCGATTAGATAAGGTTGTAGTTATATGTGTATCCGAATAGGCGCTCAATTGGTCACGTAGCTCAGTGATTTGCCACTCGACTTCTCGGCTGCAAGTCGCGTTCAGTTGAGTCACTGCTTCGCCTTCCGCAAAAAGTTCCCGAAATATTATTCAAACTAATT	chr2L_5987074_5987322_+_dCP_twist_center8	twist	TTTCATGTGAA	8	Stat92E	TTTCCCGGAAA	199	174	156	211	220	189	5.31732	5.18967	0.127645	3.12341	-2.06627	2.19391
chr2L_5987074_5987322_+_dCP_twist_center8_to_Atf2	chr2L_5987074_5987322	+	GGATCACGTCATCTTTTCACCCCGCAAACTTGTGAATCAGTTTTCATGTTGTTCCCTTTTGCCGGGCATCGAGTGCGTCTTAATTGCGCCGATTAGATAAGGTTGTAGTTATATGTGTATCCGAATAGGCGCTCAATTGGTCACGTAGCTCAGTGATTTGCCACTCGACTTCTCGGCTGCAAGTCGCGTTCAGTTGAGTCACTGCTTCGCCTTCCGCAAAAAGTTCCCGAAATATTATTCAAACTAATT	chr2L_5987074_5987322_+_dCP_twist_center8	twist	TTTCATGTGAA	8	Atf2	ATCACGTCATC	152	123	123	648	749	805	7.55764	5.18967	2.36797	3.12341	-2.06627	4.43423
chr3L_8653500_8653748_+_dCP_twist_center144_to_GATAA	chr3L_8653500_8653748	+	TGTTTGTTTGGTGACGAACTTGGTTGCTCCATTAGCATATAGCCGGTGGAGTTCTTCAATGGGGGCGGGGAATGAGCAGAGCGGATCGCAGTGGAACGGATGTGCGCTTGATTATGTTGTTTGCCAGCGAGGCTGCTCCTAGATAAGACTGCTCGAGATGACGAAGATTCTATGAGCGCCCTGCCTTCGCCGGACATTAATCATTCTTGTTTTTGAATTCTTCTCAAGCAAACAGCGCGCGACTGACGC	chr3L_8653500_8653748_+_dCP_twist_center144	twist	TCATCTGG	144	GATAA	AGATAAGA	172	138	154	341	393	441	6.42585	5.07048	1.35537	2.9187	-2.15178	3.50714
chr3L_8653500_8653748_+_dCP_twist_center144_to_AP1	chr3L_8653500_8653748	+	TGTTTGTTTGGTGACGAACTTGGTTGCTCCATTAGCATATAGCCGGTGGAGTTCTTCAATGGGGGCGGGGAATGAGCAGAGCGGATCGCAGTGGAACGGATGTGCGCTTGATTATGTTGTTTGCCAGCGAGGCTGCTCCATGAGTCACCTGCTCGAGATGACGAAGATTCTATGAGCGCCCTGCCTTCGCCGGACATTAATCATTCTTGTTTTTGAATTCTTCTCAAGCAAACAGCGCGCGACTGACGC	chr3L_8653500_8653748_+_dCP_twist_center144	twist	TTCATCTGG	144	AP1	ATGAGTCAC	128	128	147	558	642	715	7.32699	5.07048	2.25651	2.9187	-2.15178	4.40829
chr3L_8653500_8653748_+_dCP_twist_center144_to_Trl	chr3L_8653500_8653748	+	TGTTTGTTTGGTGACGAACTTGGTTGCTCCATTAGCATATAGCCGGTGGAGTTCTTCAATGGGGGCGGGGAATGAGCAGAGCGGATCGCAGTGGAACGGATGTGCGCTTGATTATGTTGTTTGCCAGCGAGGCTGCTCCTGAGAGAGGCTGCTCGAGATGACGAAGATTCTATGAGCGCCCTGCCTTCGCCGGACATTAATCATTCTTGTTTTTGAATTCTTCTCAAGCAAACAGCGCGCGACTGACGC	chr3L_8653500_8653748_+_dCP_twist_center144	twist	TCATCTG	144	Trl	GAGAGAG	231	201	217	102	123	153	4.29767	5.07048	-0.772807	2.9187	-2.15178	1.37897
chr3L_8653500_8653748_+_dCP_twist_center144_to_ETS	chr3L_8653500_8653748	+	TGTTTGTTTGGTGACGAACTTGGTTGCTCCATTAGCATATAGCCGGTGGAGTTCTTCAATGGGGGCGGGGAATGAGCAGAGCGGATCGCAGTGGAACGGATGTGCGCTTGATTATGTTGTTTGCCAGCGAGGCTGCTCCACCGGAAGTCTGCTCGAGATGACGAAGATTCTATGAGCGCCCTGCCTTCGCCGGACATTAATCATTCTTGTTTTTGAATTCTTCTCAAGCAAACAGCGCGCGACTGACGC	chr3L_8653500_8653748_+_dCP_twist_center144	twist	TTCATCTGG	144	ETS	ACCGGAAGT	274	229	238	1147	1324	1403	7.47537	5.07048	2.40488	2.9187	-2.15178	4.55666
chr3L_8653500_8653748_+_dCP_twist_center144_to_SREBP	chr3L_8653500_8653748	+	TGTTTGTTTGGTGACGAACTTGGTTGCTCCATTAGCATATAGCCGGTGGAGTTCTTCAATGGGGGCGGGGAATGAGCAGAGCGGATCGCAGTGGAACGGATGTGCGCTTGATTATGTTGTTTGCCAGCGAGGCTGCTCCATCACGCGACTGCTCGAGATGACGAAGATTCTATGAGCGCCCTGCCTTCGCCGGACATTAATCATTCTTGTTTTTGAATTCTTCTCAAGCAAACAGCGCGCGACTGACGC	chr3L_8653500_8653748_+_dCP_twist_center144	twist	TTCATCTGGC	144	SREBP	ATCACGCGAC	165	142	137	1321	1529	1902	8.50245	5.07048	3.43197	2.9187	-2.15178	5.58374
chr3L_8653500_8653748_+_dCP_twist_center144_to_Stat92E	chr3L_8653500_8653748	+	TGTTTGTTTGGTGACGAACTTGGTTGCTCCATTAGCATATAGCCGGTGGAGTTCTTCAATGGGGGCGGGGAATGAGCAGAGCGGATCGCAGTGGAACGGATGTGCGCTTGATTATGTTGTTTGCCAGCGAGGCTGCTCTTTCCCGGAAATGCTCGAGATGACGAAGATTCTATGAGCGCCCTGCCTTCGCCGGACATTAATCATTCTTGTTTTTGAATTCTTCTCAAGCAAACAGCGCGCGACTGACGC	chr3L_8653500_8653748_+_dCP_twist_center144	twist	CTTCATCTGGC	144	Stat92E	TTTCCCGGAAA	311	251	264	1228	1324	1496	7.37724	5.07048	2.30676	2.9187	-2.15178	4.45853
chr3L_8653500_8653748_+_dCP_twist_center144_to_Atf2	chr3L_8653500_8653748	+	TGTTTGTTTGGTGACGAACTTGGTTGCTCCATTAGCATATAGCCGGTGGAGTTCTTCAATGGGGGCGGGGAATGAGCAGAGCGGATCGCAGTGGAACGGATGTGCGCTTGATTATGTTGTTTGCCAGCGAGGCTGCTCATCACGTCATCTGCTCGAGATGACGAAGATTCTATGAGCGCCCTGCCTTCGCCGGACATTAATCATTCTTGTTTTTGAATTCTTCTCAAGCAAACAGCGCGCGACTGACGC	chr3L_8653500_8653748_+_dCP_twist_center144	twist	CTTCATCTGGC	144	Atf2	ATCACGTCATC	370	326	328	1129	1440	1614	7.12032	5.07048	2.04984	2.9187	-2.15178	4.20162
chrX_650907_651155_+_dCP_twist_center172_to_GATAA	chrX_650907_651155	+	ACAGACAAGCTCTCCAGTTTCTCTATTGTTGTGAGCTGGCTCCCTATGTGTTTACATTTCTCTTGCGAAGGAAAGGGGCGAACCATCCACATTTATCAGCAGTCGAAGCAAATCGTCGCTCTCCCGTAATAAGCTTATCAGTCGAGTGAAGAATATACATATATATGTAGATAAGAATAAATACATGACAGGCCAAACATTCCCCAATCGCCATCGAAATTATGCGCCGATAGCAGACACTCGGCACGT	chrX_650907_651155_+_dCP_twist_center172	twist	ACATATGT	172	GATAA	AGATAAGA	39	27	32	47	49	53	5.6797	6.59679	-0.917085	4.14189	-2.45489	1.53781
chrX_650907_651155_+_dCP_twist_center172_to_AP1	chrX_650907_651155	+	ACAGACAAGCTCTCCAGTTTCTCTATTGTTGTGAGCTGGCTCCCTATGTGTTTACATTTCTCTTGCGAAGGAAAGGGGCGAACCATCCACATTTATCAGCAGTCGAAGCAAATCGTCGCTCTCCCGTAATAAGCTTATCAGTCGAGTGAAGAATATACATATATATGATGAGTCACATAAATACATGACAGGCCAAACATTCCCCAATCGCCATCGAAATTATGCGCCGATAGCAGACACTCGGCACGT	chrX_650907_651155_+_dCP_twist_center172	twist	TACATATGT	172	AP1	ATGAGTCAC	121	109	96	623	836	915	7.95854	6.59679	1.36176	4.14189	-2.45489	3.81665
chrX_650907_651155_+_dCP_twist_center172_to_Trl	chrX_650907_651155	+	ACAGACAAGCTCTCCAGTTTCTCTATTGTTGTGAGCTGGCTCCCTATGTGTTTACATTTCTCTTGCGAAGGAAAGGGGCGAACCATCCACATTTATCAGCAGTCGAAGCAAATCGTCGCTCTCCCGTAATAAGCTTATCAGTCGAGTGAAGAATATACATATATATGTGAGAGAGTATAAATACATGACAGGCCAAACATTCCCCAATCGCCATCGAAATTATGCGCCGATAGCAGACACTCGGCACGT	chrX_650907_651155_+_dCP_twist_center172	twist	ACATATG	172	Trl	GAGAGAG	166	138	117	351	442	435	6.64275	6.59679	0.045962	4.14189	-2.45489	2.50085
chrX_650907_651155_+_dCP_twist_center172_to_ETS	chrX_650907_651155	+	ACAGACAAGCTCTCCAGTTTCTCTATTGTTGTGAGCTGGCTCCCTATGTGTTTACATTTCTCTTGCGAAGGAAAGGGGCGAACCATCCACATTTATCAGCAGTCGAAGCAAATCGTCGCTCTCCCGTAATAAGCTTATCAGTCGAGTGAAGAATATACATATATATGACCGGAAGTATAAATACATGACAGGCCAAACATTCCCCAATCGCCATCGAAATTATGCGCCGATAGCAGACACTCGGCACGT	chrX_650907_651155_+_dCP_twist_center172	twist	TACATATGT	172	ETS	ACCGGAAGT	30	26	22	299	321	337	8.70125	6.59679	2.10446	4.14189	-2.45489	4.55935
chrX_650907_651155_+_dCP_twist_center172_to_SREBP	chrX_650907_651155	+	ACAGACAAGCTCTCCAGTTTCTCTATTGTTGTGAGCTGGCTCCCTATGTGTTTACATTTCTCTTGCGAAGGAAAGGGGCGAACCATCCACATTTATCAGCAGTCGAAGCAAATCGTCGCTCTCCCGTAATAAGCTTATCAGTCGAGTGAAGAATATACATATATATGATCACGCGACTAAATACATGACAGGCCAAACATTCCCCAATCGCCATCGAAATTATGCGCCGATAGCAGACACTCGGCACGT	chrX_650907_651155_+_dCP_twist_center172	twist	TACATATGTA	172	SREBP	ATCACGCGAC	113	102	89	914	1246	1312	8.6107	6.59679	2.01392	4.14189	-2.45489	4.46881
chrX_650907_651155_+_dCP_twist_center172_to_Stat92E	chrX_650907_651155	+	ACAGACAAGCTCTCCAGTTTCTCTATTGTTGTGAGCTGGCTCCCTATGTGTTTACATTTCTCTTGCGAAGGAAAGGGGCGAACCATCCACATTTATCAGCAGTCGAAGCAAATCGTCGCTCTCCCGTAATAAGCTTATCAGTCGAGTGAAGAATATACATATATATTTTCCCGGAAATAAATACATGACAGGCCAAACATTCCCCAATCGCCATCGAAATTATGCGCCGATAGCAGACACTCGGCACGT	chrX_650907_651155_+_dCP_twist_center172	twist	GTACATATGTA	172	Stat92E	TTTCCCGGAAA	27	28	28	154	186	220	7.833	6.59679	1.23621	4.14189	-2.45489	3.6911
chrX_650907_651155_+_dCP_twist_center172_to_Atf2	chrX_650907_651155	+	ACAGACAAGCTCTCCAGTTTCTCTATTGTTGTGAGCTGGCTCCCTATGTGTTTACATTTCTCTTGCGAAGGAAAGGGGCGAACCATCCACATTTATCAGCAGTCGAAGCAAATCGTCGCTCTCCCGTAATAAGCTTATCAGTCGAGTGAAGAATATACATATATATATCACGTCATCTAAATACATGACAGGCCAAACATTCCCCAATCGCCATCGAAATTATGCGCCGATAGCAGACACTCGGCACGT	chrX_650907_651155_+_dCP_twist_center172	twist	GTACATATGTA	172	Atf2	ATCACGTCATC	47	39	51	70	122	130	6.33125	6.59679	-0.265539	4.14189	-2.45489	2.18935
chr3L_40162_40410_+_dCP_twist_center245_to_GATAA	chr3L_40162_40410	-	TAAATCGTAAATAATTTTTTCGCTCCTATGAATGGAATGGTGTGGTGGTTTGTGAGCGAGAGCGAAATATTGGTAGTAGTATTTTGAGTACCCCCTTCCTTATTATATTTCTGCTGAAATCCGATAACCAGTGTGCAAGCGAGACAAAAAAATAACAAACAATTATAAGCTATGCAAGTGTGTGTGCTGTTGTGGGCGAAAAAAGTTTCAAAACGGGAGAGGGAGGAATTGGAATTTCACAAGATAAGA	chr3L_40162_40410_+_dCP_twist_center245	twist	ACATTTGA	245	GATAA	AGATAAGA	64	45	37	82	65	84	5.73032	4.47544	1.25488	2.78832	-1.68712	2.942
chr3L_40162_40410_+_dCP_twist_center245_to_AP1	chr3L_40162_40410	-	TAAATCGTAAATAATTTTTTCGCTCCTATGAATGGAATGGTGTGGTGGTTTGTGAGCGAGAGCGAAATATTGGTAGTAGTATTTTGAGTACCCCCTTCCTTATTATATTTCTGCTGAAATCCGATAACCAGTGTGCAAGCGAGACAAAAAAATAACAAACAATTATAAGCTATGCAAGTGTGTGTGCTGTTGTGGGCGAAAAAAGTTTCAAAACGGGAGAGGGAGGAATTGGAATTTCACATGAGTCAC	chr3L_40162_40410_+_dCP_twist_center245	twist	AACATTTGA	245	AP1	ATGAGTCAC	38	24	34	46	39	84	5.87057	4.47544	1.39513	2.78832	-1.68712	3.08225
chr3L_40162_40410_+_dCP_twist_center245_to_Trl	chr3L_40162_40410	-	TAAATCGTAAATAATTTTTTCGCTCCTATGAATGGAATGGTGTGGTGGTTTGTGAGCGAGAGCGAAATATTGGTAGTAGTATTTTGAGTACCCCCTTCCTTATTATATTTCTGCTGAAATCCGATAACCAGTGTGCAAGCGAGACAAAAAAATAACAAACAATTATAAGCTATGCAAGTGTGTGTGCTGTTGTGGGCGAAAAAAGTTTCAAAACGGGAGAGGGAGGAATTGGAATTTCACAGAGAGAGA	chr3L_40162_40410_+_dCP_twist_center245	twist	ACATTTG	245	Trl	GAGAGAG	15	22	18	5	9	8	3.74183	4.47544	-0.733606	2.78832	-1.68712	0.953512
chr3L_40162_40410_+_dCP_twist_center245_to_ETS	chr3L_40162_40410	-	TAAATCGTAAATAATTTTTTCGCTCCTATGAATGGAATGGTGTGGTGGTTTGTGAGCGAGAGCGAAATATTGGTAGTAGTATTTTGAGTACCCCCTTCCTTATTATATTTCTGCTGAAATCCGATAACCAGTGTGCAAGCGAGACAAAAAAATAACAAACAATTATAAGCTATGCAAGTGTGTGTGCTGTTGTGGGCGAAAAAAGTTTCAAAACGGGAGAGGGAGGAATTGGAATTTCACACCGGAAGT	chr3L_40162_40410_+_dCP_twist_center245	twist	AACATTTGA	245	ETS	ACCGGAAGT	78	55	59	113	94	132	5.88582	4.47544	1.41038	2.78832	-1.68712	3.0975
chr3L_40162_40410_+_dCP_twist_center245_to_SREBP	chr3L_40162_40410	-	TAAATCGTAAATAATTTTTTCGCTCCTATGAATGGAATGGTGTGGTGGTTTGTGAGCGAGAGCGAAATATTGGTAGTAGTATTTTGAGTACCCCCTTCCTTATTATATTTCTGCTGAAATCCGATAACCAGTGTGCAAGCGAGACAAAAAAATAACAAACAATTATAAGCTATGCAAGTGTGTGTGCTGTTGTGGGCGAAAAAAGTTTCAAAACGGGAGAGGGAGGAATTGGAATTTCAATCACGCGAC	chr3L_40162_40410_+_dCP_twist_center245	twist	CAACATTTGA	245	SREBP	ATCACGCGAC	22	22	16	33	28	32	5.69549	4.47544	1.22005	2.78832	-1.68712	2.90717
chr3L_40162_40410_+_dCP_twist_center245_to_Stat92E	chr3L_40162_40410	-	TAAATCGTAAATAATTTTTTCGCTCCTATGAATGGAATGGTGTGGTGGTTTGTGAGCGAGAGCGAAATATTGGTAGTAGTATTTTGAGTACCCCCTTCCTTATTATATTTCTGCTGAAATCCGATAACCAGTGTGCAAGCGAGACAAAAAAATAACAAACAATTATAAGCTATGCAAGTGTGTGTGCTGTTGTGGGCGAAAAAAGTTTCAAAACGGGAGAGGGAGGAATTGGAATTTCTTTCCCGGAAA	chr3L_40162_40410_+_dCP_twist_center245	twist	ACAACATTTGA	245	Stat92E	TTTCCCGGAAA	29	28	35	15	10	18	3.95324	4.47544	-0.522193	2.78832	-1.68712	1.16493
chr3L_40162_40410_+_dCP_twist_center245_to_Atf2	chr3L_40162_40410	-	TAAATCGTAAATAATTTTTTCGCTCCTATGAATGGAATGGTGTGGTGGTTTGTGAGCGAGAGCGAAATATTGGTAGTAGTATTTTGAGTACCCCCTTCCTTATTATATTTCTGCTGAAATCCGATAACCAGTGTGCAAGCGAGACAAAAAAATAACAAACAATTATAAGCTATGCAAGTGTGTGTGCTGTTGTGGGCGAAAAAAGTTTCAAAACGGGAGAGGGAGGAATTGGAATTTCATCACGTCATC	chr3L_40162_40410_+_dCP_twist_center245	twist	ACAACATTTGA	245	Atf2	ATCACGTCATC	35	31	26	44	54	49	5.75992	4.47544	1.28449	2.78832	-1.68712	2.9716
chr3R_17566815_17567063_+_dCP_twist_center14_to_GATAA	chr3R_17566815_17567063	+	GTTCATCGCAAGATAAGACAAAGTCGGTTGATCCGGACGCGTCACCTGGGTGACGATGTGCGCAATGGGCTTTCTCAATGGGGGGATTCTTTATAAAGGGGAATGACTGTGTCAGCAATAAGGAGTCGCATCTTATCAGTGCGCGGTTGATAGTGAAACGACAACATAAACCGACAGTGTTTGATACGGCAGTATGTGTTTTAGAGCGCCTGGATTTGTTTTGATTCAGATTGAGCAACATATTCGCAT	chr3R_17566815_17567063_+_dCP_twist_center14	twist	CCATATGG	14	GATAA	AGATAAGA	162	136	131	90	137	152	4.91665	3.43973	1.47691	1.84227	-1.59747	3.07438
chr3R_17566815_17567063_+_dCP_twist_center14_to_AP1	chr3R_17566815_17567063	+	GTTCATCGCATGAGTCACCAAAGTCGGTTGATCCGGACGCGTCACCTGGGTGACGATGTGCGCAATGGGCTTTCTCAATGGGGGGATTCTTTATAAAGGGGAATGACTGTGTCAGCAATAAGGAGTCGCATCTTATCAGTGCGCGGTTGATAGTGAAACGACAACATAAACCGACAGTGTTTGATACGGCAGTATGTGTTTTAGAGCGCCTGGATTTGTTTTGATTCAGATTGAGCAACATATTCGCAT	chr3R_17566815_17567063_+_dCP_twist_center14	twist	ACCATATGG	14	AP1	ATGAGTCAC	211	211	205	141	180	229	4.88809	3.43973	1.44835	1.84227	-1.59747	3.04582
chr3R_17566815_17567063_+_dCP_twist_center14_to_Trl	chr3R_17566815_17567063	+	GTTCATCGCAGAGAGAGGCAAAGTCGGTTGATCCGGACGCGTCACCTGGGTGACGATGTGCGCAATGGGCTTTCTCAATGGGGGGATTCTTTATAAAGGGGAATGACTGTGTCAGCAATAAGGAGTCGCATCTTATCAGTGCGCGGTTGATAGTGAAACGACAACATAAACCGACAGTGTTTGATACGGCAGTATGTGTTTTAGAGCGCCTGGATTTGTTTTGATTCAGATTGAGCAACATATTCGCAT	chr3R_17566815_17567063_+_dCP_twist_center14	twist	CCATATG	14	Trl	GAGAGAG	171	139	147	21	23	20	2.2353	3.43973	-1.20443	1.84227	-1.59747	0.393033
chr3R_17566815_17567063_+_dCP_twist_center14_to_ETS	chr3R_17566815_17567063	+	GTTCATCGCACCGGAAGTCAAAGTCGGTTGATCCGGACGCGTCACCTGGGTGACGATGTGCGCAATGGGCTTTCTCAATGGGGGGATTCTTTATAAAGGGGAATGACTGTGTCAGCAATAAGGAGTCGCATCTTATCAGTGCGCGGTTGATAGTGAAACGACAACATAAACCGACAGTGTTTGATACGGCAGTATGTGTTTTAGAGCGCCTGGATTTGTTTTGATTCAGATTGAGCAACATATTCGCAT	chr3R_17566815_17567063_+_dCP_twist_center14	twist	ACCATATGG	14	ETS	ACCGGAAGT	185	172	186	185	185	224	5.19907	3.43973	1.75933	1.84227	-1.59747	3.3568
chr3R_17566815_17567063_+_dCP_twist_center14_to_SREBP	chr3R_17566815_17567063	+	GTTCATCGCATCACGCGACAAAGTCGGTTGATCCGGACGCGTCACCTGGGTGACGATGTGCGCAATGGGCTTTCTCAATGGGGGGATTCTTTATAAAGGGGAATGACTGTGTCAGCAATAAGGAGTCGCATCTTATCAGTGCGCGGTTGATAGTGAAACGACAACATAAACCGACAGTGTTTGATACGGCAGTATGTGTTTTAGAGCGCCTGGATTTGTTTTGATTCAGATTGAGCAACATATTCGCAT	chr3R_17566815_17567063_+_dCP_twist_center14	twist	ACCATATGGC	14	SREBP	ATCACGCGAC	104	88	93	125	146	172	5.7164	3.43973	2.27667	1.84227	-1.59747	3.87414
chr3R_17566815_17567063_+_dCP_twist_center14_to_Stat92E	chr3R_17566815_17567063	+	GTTCATCGTTTCCCGGAAAAAAGTCGGTTGATCCGGACGCGTCACCTGGGTGACGATGTGCGCAATGGGCTTTCTCAATGGGGGGATTCTTTATAAAGGGGAATGACTGTGTCAGCAATAAGGAGTCGCATCTTATCAGTGCGCGGTTGATAGTGAAACGACAACATAAACCGACAGTGTTTGATACGGCAGTATGTGTTTTAGAGCGCCTGGATTTGTTTTGATTCAGATTGAGCAACATATTCGCAT	chr3R_17566815_17567063_+_dCP_twist_center14	twist	CACCATATGGC	14	Stat92E	TTTCCCGGAAA	59	34	47	21	22	36	4.24438	3.43973	0.804647	1.84227	-1.59747	2.40211
chr3R_17566815_17567063_+_dCP_twist_center14_to_Atf2	chr3R_17566815_17567063	+	GTTCATCGATCACGTCATCAAAGTCGGTTGATCCGGACGCGTCACCTGGGTGACGATGTGCGCAATGGGCTTTCTCAATGGGGGGATTCTTTATAAAGGGGAATGACTGTGTCAGCAATAAGGAGTCGCATCTTATCAGTGCGCGGTTGATAGTGAAACGACAACATAAACCGACAGTGTTTGATACGGCAGTATGTGTTTTAGAGCGCCTGGATTTGTTTTGATTCAGATTGAGCAACATATTCGCAT	chr3R_17566815_17567063_+_dCP_twist_center14	twist	CACCATATGGC	14	Atf2	ATCACGTCATC	75	55	69	16	36	28	3.79172	3.43973	0.351985	1.84227	-1.59747	1.94945
chrX_7954516_7954764_+_dCP_twist_center139_to_GATAA	chrX_7954516_7954764	-	GACAAATTTTTTTTTTCATTTTTTTCGGTGGTGGAACAAAAGCGAACGAAAGAGGAGCAAGAAGCAGAAACGTTCGTCAGTGTGTGTGCGTGTGTGTGTCGAGTGAGGGGGCATGAGCATGAACGTGTGTAGTCAAGATAAGAATAATATTAACAAATAAAAGAAGAAAAAACGAAAAAAGAGGAATACACACGCAGAAGCGCGCGAAAAGTTTCACTCGAAATGAGAAAAAACAAAAGCAAAATATAC	chrX_7954516_7954764_+_dCP_twist_center139	twist	CCAAGTGA	139	GATAA	AGATAAGA	NA	NA	NA	NA	NA	NA	NA	5.50366	NA	2.95399	-2.54967	NA
chrX_7954516_7954764_+_dCP_twist_center139_to_AP1	chrX_7954516_7954764	-	GACAAATTTTTTTTTTCATTTTTTTCGGTGGTGGAACAAAAGCGAACGAAAGAGGAGCAAGAAGCAGAAACGTTCGTCAGTGTGTGTGCGTGTGTGTGTCGAGTGAGGGGGCATGAGCATGAACGTGTGTAGTCATGAGTCACATAATATTAACAAATAAAAGAAGAAAAAACGAAAAAAGAGGAATACACACGCAGAAGCGCGCGAAAAGTTTCACTCGAAATGAGAAAAAACAAAAGCAAAATATAC	chrX_7954516_7954764_+_dCP_twist_center139	twist	ACCAAGTGA	139	AP1	ATGAGTCAC	NA	NA	NA	NA	NA	NA	NA	5.50366	NA	2.95399	-2.54967	NA
chrX_7954516_7954764_+_dCP_twist_center139_to_Trl	chrX_7954516_7954764	-	GACAAATTTTTTTTTTCATTTTTTTCGGTGGTGGAACAAAAGCGAACGAAAGAGGAGCAAGAAGCAGAAACGTTCGTCAGTGTGTGTGCGTGTGTGTGTCGAGTGAGGGGGCATGAGCATGAACGTGTGTAGTCAGAGAGAGAATAATATTAACAAATAAAAGAAGAAAAAACGAAAAAAGAGGAATACACACGCAGAAGCGCGCGAAAAGTTTCACTCGAAATGAGAAAAAACAAAAGCAAAATATAC	chrX_7954516_7954764_+_dCP_twist_center139	twist	CCAAGTG	139	Trl	GAGAGAG	NA	NA	NA	NA	NA	NA	NA	5.50366	NA	2.95399	-2.54967	NA
chrX_7954516_7954764_+_dCP_twist_center139_to_ETS	chrX_7954516_7954764	-	GACAAATTTTTTTTTTCATTTTTTTCGGTGGTGGAACAAAAGCGAACGAAAGAGGAGCAAGAAGCAGAAACGTTCGTCAGTGTGTGTGCGTGTGTGTGTCGAGTGAGGGGGCATGAGCATGAACGTGTGTAGTCACCGGAAGTATAATATTAACAAATAAAAGAAGAAAAAACGAAAAAAGAGGAATACACACGCAGAAGCGCGCGAAAAGTTTCACTCGAAATGAGAAAAAACAAAAGCAAAATATAC	chrX_7954516_7954764_+_dCP_twist_center139	twist	ACCAAGTGA	139	ETS	ACCGGAAGT	NA	NA	NA	NA	NA	NA	NA	5.50366	NA	2.95399	-2.54967	NA
chrX_7954516_7954764_+_dCP_twist_center139_to_SREBP	chrX_7954516_7954764	-	GACAAATTTTTTTTTTCATTTTTTTCGGTGGTGGAACAAAAGCGAACGAAAGAGGAGCAAGAAGCAGAAACGTTCGTCAGTGTGTGTGCGTGTGTGTGTCGAGTGAGGGGGCATGAGCATGAACGTGTGTAGTCATCACGCGACTAATATTAACAAATAAAAGAAGAAAAAACGAAAAAAGAGGAATACACACGCAGAAGCGCGCGAAAAGTTTCACTCGAAATGAGAAAAAACAAAAGCAAAATATAC	chrX_7954516_7954764_+_dCP_twist_center139	twist	ACCAAGTGAA	139	SREBP	ATCACGCGAC	NA	NA	NA	NA	NA	NA	NA	5.50366	NA	2.95399	-2.54967	NA
chrX_7954516_7954764_+_dCP_twist_center139_to_Stat92E	chrX_7954516_7954764	-	GACAAATTTTTTTTTTCATTTTTTTCGGTGGTGGAACAAAAGCGAACGAAAGAGGAGCAAGAAGCAGAAACGTTCGTCAGTGTGTGTGCGTGTGTGTGTCGAGTGAGGGGGCATGAGCATGAACGTGTGTAGTTTTCCCGGAAATAATATTAACAAATAAAAGAAGAAAAAACGAAAAAAGAGGAATACACACGCAGAAGCGCGCGAAAAGTTTCACTCGAAATGAGAAAAAACAAAAGCAAAATATAC	chrX_7954516_7954764_+_dCP_twist_center139	twist	CACCAAGTGAA	139	Stat92E	TTTCCCGGAAA	35	26	36	5	5	2	2.05003	5.50366	-3.45364	2.95399	-2.54967	-0.903967
chrX_7954516_7954764_+_dCP_twist_center139_to_Atf2	chrX_7954516_7954764	-	GACAAATTTTTTTTTTCATTTTTTTCGGTGGTGGAACAAAAGCGAACGAAAGAGGAGCAAGAAGCAGAAACGTTCGTCAGTGTGTGTGCGTGTGTGTGTCGAGTGAGGGGGCATGAGCATGAACGTGTGTAGTATCACGTCATCTAATATTAACAAATAAAAGAAGAAAAAACGAAAAAAGAGGAATACACACGCAGAAGCGCGCGAAAAGTTTCACTCGAAATGAGAAAAAACAAAAGCAAAATATAC	chrX_7954516_7954764_+_dCP_twist_center139	twist	CACCAAGTGAA	139	Atf2	ATCACGTCATC	NA	NA	NA	NA	NA	NA	NA	5.50366	NA	2.95399	-2.54967	NA
chr2R_1586328_1586576_+_dCP_twist_center229_to_GATAA	chr2R_1586328_1586576	+	GACGACAAGGGACCTGTTCTGTGCTGGATCCACGCTATCGAAGCTTATCAGAAGCTCAACATTGCACTGCCTGTGAATGTTAAATTCGTATTTGAGGGAATGGAGGAAAGCGGCAGCGAAGGCCTCGATGACTTGTTATTGGAACGTAAAGATAATTTCTTAGCGGATGTTGATTTTGTTTGCATATCCGATAACTACTGGCTTGGAAAAAAACGCCCTTGCCTCAGATAAGAGCTTCGCGGTTTGGCA	chr2R_1586328_1586576_+_dCP_twist_center229	twist	ACATATGG	229	GATAA	AGATAAGA	91	87	100	166	167	211	6.03583	4.42955	1.60628	2.54968	-1.87988	3.48615
chr2R_1586328_1586576_+_dCP_twist_center229_to_AP1	chr2R_1586328_1586576	+	GACGACAAGGGACCTGTTCTGTGCTGGATCCACGCTATCGAAGCTTATCAGAAGCTCAACATTGCACTGCCTGTGAATGTTAAATTCGTATTTGAGGGAATGGAGGAAAGCGGCAGCGAAGGCCTCGATGACTTGTTATTGGAACGTAAAGATAATTTCTTAGCGGATGTTGATTTTGTTTGCATATCCGATAACTACTGGCTTGGAAAAAAACGCCCTTGCCTATGAGTCACGCTTCGCGGTTTGGCA	chr2R_1586328_1586576_+_dCP_twist_center229	twist	CACATATGG	229	AP1	ATGAGTCAC	115	84	93	226	228	282	6.41126	4.42955	1.98171	2.54968	-1.87988	3.86159
chr2R_1586328_1586576_+_dCP_twist_center229_to_Trl	chr2R_1586328_1586576	+	GACGACAAGGGACCTGTTCTGTGCTGGATCCACGCTATCGAAGCTTATCAGAAGCTCAACATTGCACTGCCTGTGAATGTTAAATTCGTATTTGAGGGAATGGAGGAAAGCGGCAGCGAAGGCCTCGATGACTTGTTATTGGAACGTAAAGATAATTTCTTAGCGGATGTTGATTTTGTTTGCATATCCGATAACTACTGGCTTGGAAAAAAACGCCCTTGCCTCGAGAGAGGGCTTCGCGGTTTGGCA	chr2R_1586328_1586576_+_dCP_twist_center229	twist	ACATATG	229	Trl	GAGAGAG	169	123	130	83	47	73	3.99723	4.42955	-0.432321	2.54968	-1.87988	1.44756
chr2R_1586328_1586576_+_dCP_twist_center229_to_ETS	chr2R_1586328_1586576	+	GACGACAAGGGACCTGTTCTGTGCTGGATCCACGCTATCGAAGCTTATCAGAAGCTCAACATTGCACTGCCTGTGAATGTTAAATTCGTATTTGAGGGAATGGAGGAAAGCGGCAGCGAAGGCCTCGATGACTTGTTATTGGAACGTAAAGATAATTTCTTAGCGGATGTTGATTTTGTTTGCATATCCGATAACTACTGGCTTGGAAAAAAACGCCCTTGCCTACCGGAAGTGCTTCGCGGTTTGGCA	chr2R_1586328_1586576_+_dCP_twist_center229	twist	CACATATGG	229	ETS	ACCGGAAGT	269	223	202	413	348	438	5.85726	4.42955	1.42771	2.54968	-1.87988	3.30758
chr2R_1586328_1586576_+_dCP_twist_center229_to_SREBP	chr2R_1586328_1586576	+	GACGACAAGGGACCTGTTCTGTGCTGGATCCACGCTATCGAAGCTTATCAGAAGCTCAACATTGCACTGCCTGTGAATGTTAAATTCGTATTTGAGGGAATGGAGGAAAGCGGCAGCGAAGGCCTCGATGACTTGTTATTGGAACGTAAAGATAATTTCTTAGCGGATGTTGATTTTGTTTGCATATCCGATAACTACTGGCTTGGAAAAAAACGCCCTTGCCTATCACGCGACCTTCGCGGTTTGGCA	chr2R_1586328_1586576_+_dCP_twist_center229	twist	CACATATGGG	229	SREBP	ATCACGCGAC	94	86	77	165	136	160	5.90785	4.42955	1.47829	2.54968	-1.87988	3.35817
chr2R_1586328_1586576_+_dCP_twist_center229_to_Stat92E	chr2R_1586328_1586576	+	GACGACAAGGGACCTGTTCTGTGCTGGATCCACGCTATCGAAGCTTATCAGAAGCTCAACATTGCACTGCCTGTGAATGTTAAATTCGTATTTGAGGGAATGGAGGAAAGCGGCAGCGAAGGCCTCGATGACTTGTTATTGGAACGTAAAGATAATTTCTTAGCGGATGTTGATTTTGTTTGCATATCCGATAACTACTGGCTTGGAAAAAAACGCCCTTGCCTTTCCCGGAAACTTCGCGGTTTGGCA	chr2R_1586328_1586576_+_dCP_twist_center229	twist	TCACATATGGG	229	Stat92E	TTTCCCGGAAA	99	99	106	41	45	56	3.96678	4.42955	-0.462778	2.54968	-1.87988	1.4171
chr2R_1586328_1586576_+_dCP_twist_center229_to_Atf2	chr2R_1586328_1586576	+	GACGACAAGGGACCTGTTCTGTGCTGGATCCACGCTATCGAAGCTTATCAGAAGCTCAACATTGCACTGCCTGTGAATGTTAAATTCGTATTTGAGGGAATGGAGGAAAGCGGCAGCGAAGGCCTCGATGACTTGTTATTGGAACGTAAAGATAATTTCTTAGCGGATGTTGATTTTGTTTGCATATCCGATAACTACTGGCTTGGAAAAAAACGCCCTTGCCATCACGTCATCCTTCGCGGTTTGGCA	chr2R_1586328_1586576_+_dCP_twist_center229	twist	TCACATATGGG	229	Atf2	ATCACGTCATC	89	78	87	68	68	74	4.79569	4.42955	0.366141	2.54968	-1.87988	2.24602
chr3L_16819615_16819863_+_dCP_twist_center10_to_GATAA	chr3L_16819615_16819863	-	ATTAAAAGATAAGACAGCTGGAGATTATCTAATTTCGGGGGCATCTTCACGATAGACATACAAACATATGTGGCTCAAAGAGGAAGGAAGTTGTTGAAATAAGATGGAATTTTATCTGATCTGTAGACACGAGAAATGCTAATGACAAATATCTGAGTTTGAATTGCGAAAAAGATAGAGTGGTCGAAATAAAATATAACGAATGCTATAATGTTCCACTTTTTAAAAGATTTTGAATGCAATGTAACC	chr3L_16819615_16819863_+_dCP_twist_center10	twist	CCAGCTGC	10	GATAA	AGATAAGA	NA	NA	NA	NA	NA	NA	NA	4.95314	NA	3.81605	-1.1371	NA
chr3L_16819615_16819863_+_dCP_twist_center10_to_AP1	chr3L_16819615_16819863	-	ATTAAATGAGTCACCAGCTGGAGATTATCTAATTTCGGGGGCATCTTCACGATAGACATACAAACATATGTGGCTCAAAGAGGAAGGAAGTTGTTGAAATAAGATGGAATTTTATCTGATCTGTAGACACGAGAAATGCTAATGACAAATATCTGAGTTTGAATTGCGAAAAAGATAGAGTGGTCGAAATAAAATATAACGAATGCTATAATGTTCCACTTTTTAAAAGATTTTGAATGCAATGTAACC	chr3L_16819615_16819863_+_dCP_twist_center10	twist	ACCAGCTGC	10	AP1	ATGAGTCAC	28	27	24	65	81	71	6.54519	4.95314	1.59205	3.81605	-1.1371	2.72914
chr3L_16819615_16819863_+_dCP_twist_center10_to_Trl	chr3L_16819615_16819863	-	ATTAAAGAGAGAGCCAGCTGGAGATTATCTAATTTCGGGGGCATCTTCACGATAGACATACAAACATATGTGGCTCAAAGAGGAAGGAAGTTGTTGAAATAAGATGGAATTTTATCTGATCTGTAGACACGAGAAATGCTAATGACAAATATCTGAGTTTGAATTGCGAAAAAGATAGAGTGGTCGAAATAAAATATAACGAATGCTATAATGTTCCACTTTTTAAAAGATTTTGAATGCAATGTAACC	chr3L_16819615_16819863_+_dCP_twist_center10	twist	CCAGCTG	10	Trl	GAGAGAG	28	28	22	18	17	21	4.58439	4.95314	-0.368749	3.81605	-1.1371	0.768347
chr3L_16819615_16819863_+_dCP_twist_center10_to_ETS	chr3L_16819615_16819863	-	ATTAAACCGGAAGTCAGCTGGAGATTATCTAATTTCGGGGGCATCTTCACGATAGACATACAAACATATGTGGCTCAAAGAGGAAGGAAGTTGTTGAAATAAGATGGAATTTTATCTGATCTGTAGACACGAGAAATGCTAATGACAAATATCTGAGTTTGAATTGCGAAAAAGATAGAGTGGTCGAAATAAAATATAACGAATGCTATAATGTTCCACTTTTTAAAAGATTTTGAATGCAATGTAACC	chr3L_16819615_16819863_+_dCP_twist_center10	twist	ACCAGCTGC	10	ETS	ACCGGAAGT	NA	NA	NA	NA	NA	NA	NA	4.95314	NA	3.81605	-1.1371	NA
chr3L_16819615_16819863_+_dCP_twist_center10_to_SREBP	chr3L_16819615_16819863	-	ATTAAATCACGCGACAGCTGGAGATTATCTAATTTCGGGGGCATCTTCACGATAGACATACAAACATATGTGGCTCAAAGAGGAAGGAAGTTGTTGAAATAAGATGGAATTTTATCTGATCTGTAGACACGAGAAATGCTAATGACAAATATCTGAGTTTGAATTGCGAAAAAGATAGAGTGGTCGAAATAAAATATAACGAATGCTATAATGTTCCACTTTTTAAAAGATTTTGAATGCAATGTAACC	chr3L_16819615_16819863_+_dCP_twist_center10	twist	ACCAGCTGCC	10	SREBP	ATCACGCGAC	26	25	18	153	166	180	7.93518	4.95314	2.98204	3.81605	-1.1371	4.11913
chr3L_16819615_16819863_+_dCP_twist_center10_to_Stat92E	chr3L_16819615_16819863	-	ATTATTTCCCGGAAAAGCTGGAGATTATCTAATTTCGGGGGCATCTTCACGATAGACATACAAACATATGTGGCTCAAAGAGGAAGGAAGTTGTTGAAATAAGATGGAATTTTATCTGATCTGTAGACACGAGAAATGCTAATGACAAATATCTGAGTTTGAATTGCGAAAAAGATAGAGTGGTCGAAATAAAATATAACGAATGCTATAATGTTCCACTTTTTAAAAGATTTTGAATGCAATGTAACC	chr3L_16819615_16819863_+_dCP_twist_center10	twist	AACCAGCTGCC	10	Stat92E	TTTCCCGGAAA	22	21	18	9	15	22	4.66193	4.95314	-0.291207	3.81605	-1.1371	0.845888
chr3L_16819615_16819863_+_dCP_twist_center10_to_Atf2	chr3L_16819615_16819863	-	ATTAATCACGTCATCAGCTGGAGATTATCTAATTTCGGGGGCATCTTCACGATAGACATACAAACATATGTGGCTCAAAGAGGAAGGAAGTTGTTGAAATAAGATGGAATTTTATCTGATCTGTAGACACGAGAAATGCTAATGACAAATATCTGAGTTTGAATTGCGAAAAAGATAGAGTGGTCGAAATAAAATATAACGAATGCTATAATGTTCCACTTTTTAAAAGATTTTGAATGCAATGTAACC	chr3L_16819615_16819863_+_dCP_twist_center10	twist	AACCAGCTGCC	10	Atf2	ATCACGTCATC	NA	NA	NA	NA	NA	NA	NA	4.95314	NA	3.81605	-1.1371	NA
chr3R_16389678_16389926_+_dCP_twist_center182_to_GATAA	chr3R_16389678_16389926	-	GTTTATCGCAGTCTTTAGATAGTAAACAAAAAGCTCCCACTCTTAGGCGAATGTTAAGAGCAACTAAAAAGAGATAAGACTACGAGCTTCCGACGACTTTTGGATGGAGGGCCACTTTCAGTGACGATAAAAGTGGCCGCGGATCAAGTCGGCCCGCAAAACTTTCCACACACAACATAGATAAGAGTACTGGCGACAGATTAGTTGACCCACAAGTAGCAACAAAAAAAGAACCATGTTGTCACAGAA	chr3R_16389678_16389926_+_dCP_twist_center182	twist	ACACATGT	182	GATAA	AGATAAGA	11	18	14	25	21	26	5.79889	5.00681	0.792079	2.65428	-2.35253	3.14461
chr3R_16389678_16389926_+_dCP_twist_center182_to_AP1	chr3R_16389678_16389926	-	GTTTATCGCAGTCTTTAGATAGTAAACAAAAAGCTCCCACTCTTAGGCGAATGTTAAGAGCAACTAAAAAGAGATAAGACTACGAGCTTCCGACGACTTTTGGATGGAGGGCCACTTTCAGTGACGATAAAAGTGGCCGCGGATCAAGTCGGCCCGCAAAACTTTCCACACACAACAATGAGTCACGTACTGGCGACAGATTAGTTGACCCACAAGTAGCAACAAAAAAAGAACCATGTTGTCACAGAA	chr3R_16389678_16389926_+_dCP_twist_center182	twist	TACACATGT	182	AP1	ATGAGTCAC	62	71	60	135	112	151	6.10085	5.00681	1.09403	2.65428	-2.35253	3.44656
chr3R_16389678_16389926_+_dCP_twist_center182_to_Trl	chr3R_16389678_16389926	-	GTTTATCGCAGTCTTTAGATAGTAAACAAAAAGCTCCCACTCTTAGGCGAATGTTAAGAGCAACTAAAAAGAGATAAGACTACGAGCTTCCGACGACTTTTGGATGGAGGGCCACTTTCAGTGACGATAAAAGTGGCCGCGGATCAAGTCGGCCCGCAAAACTTTCCACACACAACATGAGAGAGTGTACTGGCGACAGATTAGTTGACCCACAAGTAGCAACAAAAAAAGAACCATGTTGTCACAGAA	chr3R_16389678_16389926_+_dCP_twist_center182	twist	ACACATG	182	Trl	GAGAGAG	26	34	36	3	8	11	2.93435	5.00681	-2.07247	2.65428	-2.35253	0.280067
chr3R_16389678_16389926_+_dCP_twist_center182_to_ETS	chr3R_16389678_16389926	-	GTTTATCGCAGTCTTTAGATAGTAAACAAAAAGCTCCCACTCTTAGGCGAATGTTAAGAGCAACTAAAAAGAGATAAGACTACGAGCTTCCGACGACTTTTGGATGGAGGGCCACTTTCAGTGACGATAAAAGTGGCCGCGGATCAAGTCGGCCCGCAAAACTTTCCACACACAACAACCGGAAGTGTACTGGCGACAGATTAGTTGACCCACAAGTAGCAACAAAAAAAGAACCATGTTGTCACAGAA	chr3R_16389678_16389926_+_dCP_twist_center182	twist	TACACATGT	182	ETS	ACCGGAAGT	51	45	47	137	105	121	6.40565	5.00681	1.39883	2.65428	-2.35253	3.75137
chr3R_16389678_16389926_+_dCP_twist_center182_to_SREBP	chr3R_16389678_16389926	-	GTTTATCGCAGTCTTTAGATAGTAAACAAAAAGCTCCCACTCTTAGGCGAATGTTAAGAGCAACTAAAAAGAGATAAGACTACGAGCTTCCGACGACTTTTGGATGGAGGGCCACTTTCAGTGACGATAAAAGTGGCCGCGGATCAAGTCGGCCCGCAAAACTTTCCACACACAACAATCACGCGACTACTGGCGACAGATTAGTTGACCCACAAGTAGCAACAAAAAAAGAACCATGTTGTCACAGAA	chr3R_16389678_16389926_+_dCP_twist_center182	twist	TACACATGTG	182	SREBP	ATCACGCGAC	81	84	87	183	214	205	6.33942	5.00681	1.3326	2.65428	-2.35253	3.68514
chr3R_16389678_16389926_+_dCP_twist_center182_to_Stat92E	chr3R_16389678_16389926	-	GTTTATCGCAGTCTTTAGATAGTAAACAAAAAGCTCCCACTCTTAGGCGAATGTTAAGAGCAACTAAAAAGAGATAAGACTACGAGCTTCCGACGACTTTTGGATGGAGGGCCACTTTCAGTGACGATAAAAGTGGCCGCGGATCAAGTCGGCCCGCAAAACTTTCCACACACAACTTTCCCGGAAATACTGGCGACAGATTAGTTGACCCACAAGTAGCAACAAAAAAAGAACCATGTTGTCACAGAA	chr3R_16389678_16389926_+_dCP_twist_center182	twist	ATACACATGTG	182	Stat92E	TTTCCCGGAAA	121	78	95	14	11	15	2.18843	5.00681	-2.81838	2.65428	-2.35253	-0.465852
chr3R_16389678_16389926_+_dCP_twist_center182_to_Atf2	chr3R_16389678_16389926	-	GTTTATCGCAGTCTTTAGATAGTAAACAAAAAGCTCCCACTCTTAGGCGAATGTTAAGAGCAACTAAAAAGAGATAAGACTACGAGCTTCCGACGACTTTTGGATGGAGGGCCACTTTCAGTGACGATAAAAGTGGCCGCGGATCAAGTCGGCCCGCAAAACTTTCCACACACAACATCACGTCATCTACTGGCGACAGATTAGTTGACCCACAAGTAGCAACAAAAAAAGAACCATGTTGTCACAGAA	chr3R_16389678_16389926_+_dCP_twist_center182	twist	ATACACATGTG	182	Atf2	ATCACGTCATC	93	94	79	139	138	171	5.82103	5.00681	0.814213	2.65428	-2.35253	3.16675
chr2R_2757413_2757661_+_dCP_twist_center189_to_GATAA	chr2R_2757413_2757661	-	ATGACGTTGCGCCTGCATCAATGACATCATCATCATCATCATCGCCATCAACCTCACCATCCAGTCGAGATGAGGCGAACGGCGAAAGTTTCCAGTGCAGCCGACAGCCGATAAACAGCGGGCCCCTTATCAGGGGTGACTCATGCATGTGGCATTGATCATTGGCCAGCTGATTAGGTGTCGCTAGATAAGAGCACAGGAAGAAAAGATACCACGAGTTAATCAAAACCAAGCCGCGCAACGCAAACA	chr2R_2757413_2757661_+_dCP_twist_center189	twist	GCAGCTGT	189	GATAA	AGATAAGA	64	51	60	43	40	58	4.75134	4.53939	0.211959	2.44009	-2.0993	2.31126
chr2R_2757413_2757661_+_dCP_twist_center189_to_AP1	chr2R_2757413_2757661	-	ATGACGTTGCGCCTGCATCAATGACATCATCATCATCATCATCGCCATCAACCTCACCATCCAGTCGAGATGAGGCGAACGGCGAAAGTTTCCAGTGCAGCCGACAGCCGATAAACAGCGGGCCCCTTATCAGGGGTGACTCATGCATGTGGCATTGATCATTGGCCAGCTGATTAGGTGTCGCATGAGTCACGCACAGGAAGAAAAGATACCACGAGTTAATCAAAACCAAGCCGCGCAACGCAAACA	chr2R_2757413_2757661_+_dCP_twist_center189	twist	TGCAGCTGT	189	AP1	ATGAGTCAC	83	93	75	234	291	365	6.90326	4.53939	2.36387	2.44009	-2.0993	4.46317
chr2R_2757413_2757661_+_dCP_twist_center189_to_Trl	chr2R_2757413_2757661	-	ATGACGTTGCGCCTGCATCAATGACATCATCATCATCATCATCGCCATCAACCTCACCATCCAGTCGAGATGAGGCGAACGGCGAAAGTTTCCAGTGCAGCCGACAGCCGATAAACAGCGGGCCCCTTATCAGGGGTGACTCATGCATGTGGCATTGATCATTGGCCAGCTGATTAGGTGTCGCTGAGAGAGTGCACAGGAAGAAAAGATACCACGAGTTAATCAAAACCAAGCCGCGCAACGCAAACA	chr2R_2757413_2757661_+_dCP_twist_center189	twist	GCAGCTG	189	Trl	GAGAGAG	34	24	25	19	14	18	4.35979	4.53939	-0.179595	2.44009	-2.0993	1.9197
chr2R_2757413_2757661_+_dCP_twist_center189_to_ETS	chr2R_2757413_2757661	-	ATGACGTTGCGCCTGCATCAATGACATCATCATCATCATCATCGCCATCAACCTCACCATCCAGTCGAGATGAGGCGAACGGCGAAAGTTTCCAGTGCAGCCGACAGCCGATAAACAGCGGGCCCCTTATCAGGGGTGACTCATGCATGTGGCATTGATCATTGGCCAGCTGATTAGGTGTCGCACCGGAAGTGCACAGGAAGAAAAGATACCACGAGTTAATCAAAACCAAGCCGCGCAACGCAAACA	chr2R_2757413_2757661_+_dCP_twist_center189	twist	TGCAGCTGT	189	ETS	ACCGGAAGT	195	165	160	595	628	725	6.98643	4.53939	2.44705	2.44009	-2.0993	4.54634
chr2R_2757413_2757661_+_dCP_twist_center189_to_SREBP	chr2R_2757413_2757661	-	ATGACGTTGCGCCTGCATCAATGACATCATCATCATCATCATCGCCATCAACCTCACCATCCAGTCGAGATGAGGCGAACGGCGAAAGTTTCCAGTGCAGCCGACAGCCGATAAACAGCGGGCCCCTTATCAGGGGTGACTCATGCATGTGGCATTGATCATTGGCCAGCTGATTAGGTGTCGCATCACGCGACCACAGGAAGAAAAGATACCACGAGTTAATCAAAACCAAGCCGCGCAACGCAAACA	chr2R_2757413_2757661_+_dCP_twist_center189	twist	TGCAGCTGTG	189	SREBP	ATCACGCGAC	249	216	200	769	896	1139	7.15807	4.53939	2.61869	2.44009	-2.0993	4.71798
chr2R_2757413_2757661_+_dCP_twist_center189_to_Stat92E	chr2R_2757413_2757661	-	ATGACGTTGCGCCTGCATCAATGACATCATCATCATCATCATCGCCATCAACCTCACCATCCAGTCGAGATGAGGCGAACGGCGAAAGTTTCCAGTGCAGCCGACAGCCGATAAACAGCGGGCCCCTTATCAGGGGTGACTCATGCATGTGGCATTGATCATTGGCCAGCTGATTAGGTGTCGTTTCCCGGAAACACAGGAAGAAAAGATACCACGAGTTAATCAAAACCAAGCCGCGCAACGCAAACA	chr2R_2757413_2757661_+_dCP_twist_center189	twist	CTGCAGCTGTG	189	Stat92E	TTTCCCGGAAA	139	109	116	798	855	1077	7.98679	4.53939	3.4474	2.44009	-2.0993	5.5467
chr2R_2757413_2757661_+_dCP_twist_center189_to_Atf2	chr2R_2757413_2757661	-	ATGACGTTGCGCCTGCATCAATGACATCATCATCATCATCATCGCCATCAACCTCACCATCCAGTCGAGATGAGGCGAACGGCGAAAGTTTCCAGTGCAGCCGACAGCCGATAAACAGCGGGCCCCTTATCAGGGGTGACTCATGCATGTGGCATTGATCATTGGCCAGCTGATTAGGTGTCGATCACGTCATCCACAGGAAGAAAAGATACCACGAGTTAATCAAAACCAAGCCGCGCAACGCAAACA	chr2R_2757413_2757661_+_dCP_twist_center189	twist	CTGCAGCTGTG	189	Atf2	ATCACGTCATC	142	110	139	431	483	591	7.02491	4.53939	2.48553	2.44009	-2.0993	4.58482
chr2L_9785873_9786121_+_dCP_twist_center147_to_GATAA	chr2L_9785873_9786121	+	CTGCCGCAAAATGATAAGCCCAAGATCATACCATACACCACTGATAAGCAGCGATGACCCTGGCAACGGGTGTTCACTGTGATGCCATCCACCCCTTTTTCATCCCTTCAGCTCAGTGAAATGGAACGCGTGACGAATTTGTGAGATAAGAGCAAATTTGCCGACTTACGTAAAGATCGCTCGCCATTCGGGGCAATGCTATTAGCCCAAGATTACGGGCGTTGGTAGGGAACTGCTTAAGAATACGCA	chr2L_9785873_9786121_+_dCP_twist_center147	twist	CCACATGT	147	GATAA	AGATAAGA	111	113	111	311	313	401	6.6813	5.44124	1.24007	3.47152	-1.96972	3.20979
chr2L_9785873_9786121_+_dCP_twist_center147_to_AP1	chr2L_9785873_9786121	+	CTGCCGCAAAATGATAAGCCCAAGATCATACCATACACCACTGATAAGCAGCGATGACCCTGGCAACGGGTGTTCACTGTGATGCCATCCACCCCTTTTTCATCCCTTCAGCTCAGTGAAATGGAACGCGTGACGAATTTGTATGAGTCACGCAAATTTGCCGACTTACGTAAAGATCGCTCGCCATTCGGGGCAATGCTATTAGCCCAAGATTACGGGCGTTGGTAGGGAACTGCTTAAGAATACGCA	chr2L_9785873_9786121_+_dCP_twist_center147	twist	GCCACATGT	147	AP1	ATGAGTCAC	81	58	79	153	142	219	6.30163	5.44124	0.860397	3.47152	-1.96972	2.83012
chr2L_9785873_9786121_+_dCP_twist_center147_to_Trl	chr2L_9785873_9786121	+	CTGCCGCAAAATGATAAGCCCAAGATCATACCATACACCACTGATAAGCAGCGATGACCCTGGCAACGGGTGTTCACTGTGATGCCATCCACCCCTTTTTCATCCCTTCAGCTCAGTGAAATGGAACGCGTGACGAATTTGTGGAGAGAGTGCAAATTTGCCGACTTACGTAAAGATCGCTCGCCATTCGGGGCAATGCTATTAGCCCAAGATTACGGGCGTTGGTAGGGAACTGCTTAAGAATACGCA	chr2L_9785873_9786121_+_dCP_twist_center147	twist	CCACATG	147	Trl	GAGAGAG	93	57	72	17	27	24	3.38462	5.44124	-2.05662	3.47152	-1.96972	-0.0868977
chr2L_9785873_9786121_+_dCP_twist_center147_to_ETS	chr2L_9785873_9786121	+	CTGCCGCAAAATGATAAGCCCAAGATCATACCATACACCACTGATAAGCAGCGATGACCCTGGCAACGGGTGTTCACTGTGATGCCATCCACCCCTTTTTCATCCCTTCAGCTCAGTGAAATGGAACGCGTGACGAATTTGTACCGGAAGTGCAAATTTGCCGACTTACGTAAAGATCGCTCGCCATTCGGGGCAATGCTATTAGCCCAAGATTACGGGCGTTGGTAGGGAACTGCTTAAGAATACGCA	chr2L_9785873_9786121_+_dCP_twist_center147	twist	GCCACATGT	147	ETS	ACCGGAAGT	48	61	49	188	185	264	7.071	5.44124	1.62976	3.47152	-1.96972	3.59948
chr2L_9785873_9786121_+_dCP_twist_center147_to_SREBP	chr2L_9785873_9786121	+	CTGCCGCAAAATGATAAGCCCAAGATCATACCATACACCACTGATAAGCAGCGATGACCCTGGCAACGGGTGTTCACTGTGATGCCATCCACCCCTTTTTCATCCCTTCAGCTCAGTGAAATGGAACGCGTGACGAATTTGTATCACGCGACCAAATTTGCCGACTTACGTAAAGATCGCTCGCCATTCGGGGCAATGCTATTAGCCCAAGATTACGGGCGTTGGTAGGGAACTGCTTAAGAATACGCA	chr2L_9785873_9786121_+_dCP_twist_center147	twist	GCCACATGTG	147	SREBP	ATCACGCGAC	72	53	64	48	69	77	5.12631	5.44124	-0.314926	3.47152	-1.96972	1.65479
chr2L_9785873_9786121_+_dCP_twist_center147_to_Stat92E	chr2L_9785873_9786121	+	CTGCCGCAAAATGATAAGCCCAAGATCATACCATACACCACTGATAAGCAGCGATGACCCTGGCAACGGGTGTTCACTGTGATGCCATCCACCCCTTTTTCATCCCTTCAGCTCAGTGAAATGGAACGCGTGACGAATTTGTTTCCCGGAAACAAATTTGCCGACTTACGTAAAGATCGCTCGCCATTCGGGGCAATGCTATTAGCCCAAGATTACGGGCGTTGGTAGGGAACTGCTTAAGAATACGCA	chr2L_9785873_9786121_+_dCP_twist_center147	twist	TGCCACATGTG	147	Stat92E	TTTCCCGGAAA	239	190	203	555	484	669	6.5006	5.44124	1.05936	3.47152	-1.96972	3.02908
chr2L_9785873_9786121_+_dCP_twist_center147_to_Atf2	chr2L_9785873_9786121	+	CTGCCGCAAAATGATAAGCCCAAGATCATACCATACACCACTGATAAGCAGCGATGACCCTGGCAACGGGTGTTCACTGTGATGCCATCCACCCCTTTTTCATCCCTTCAGCTCAGTGAAATGGAACGCGTGACGAATTTGATCACGTCATCCAAATTTGCCGACTTACGTAAAGATCGCTCGCCATTCGGGGCAATGCTATTAGCCCAAGATTACGGGCGTTGGTAGGGAACTGCTTAAGAATACGCA	chr2L_9785873_9786121_+_dCP_twist_center147	twist	TGCCACATGTG	147	Atf2	ATCACGTCATC	172	150	173	297	367	376	6.15975	5.44124	0.718513	3.47152	-1.96972	2.68823
chr2R_8344334_8344582_+_dCP_twist_center81_to_GATAA	chr2R_8344334_8344582	+	TAGCTGATAGCTGATAGCTGCAAAGAAAGCAACGCGAAATTGAATTCACTTTTTGCTGAATTTTCAAACGCTGGCTGAGATAAGACGCCATTCGTATTGGGGCATTGTTGTTCCGAACGGAAGCGGAGAATCTTTCAGATACTTATCGCTCGTCGAGGGATCGAGGATCATGCTAAATTAACTTTAATTGTTCAATTATGCGCGAGAATCTCGCGCACAGATCACTTCGGGGTGTCTGAACCTGAAACG	chr2R_8344334_8344582_+_dCP_twist_center81	twist	GCAGCTGT	81	GATAA	AGATAAGA	144	126	150	197	121	147	5.19643	5.06758	0.128858	3.19268	-1.8749	2.00376
chr2R_8344334_8344582_+_dCP_twist_center81_to_AP1	chr2R_8344334_8344582	+	TAGCTGATAGCTGATAGCTGCAAAGAAAGCAACGCGAAATTGAATTCACTTTTTGCTGAATTTTCAAACGCTGGCTATGAGTCACCGCCATTCGTATTGGGGCATTGTTGTTCCGAACGGAAGCGGAGAATCTTTCAGATACTTATCGCTCGTCGAGGGATCGAGGATCATGCTAAATTAACTTTAATTGTTCAATTATGCGCGAGAATCTCGCGCACAGATCACTTCGGGGTGTCTGAACCTGAAACG	chr2R_8344334_8344582_+_dCP_twist_center81	twist	GGCAGCTGT	81	AP1	ATGAGTCAC	168	153	123	179	105	152	5.02223	5.06758	-0.0453508	3.19268	-1.8749	1.82955
chr2R_8344334_8344582_+_dCP_twist_center81_to_Trl	chr2R_8344334_8344582	+	TAGCTGATAGCTGATAGCTGCAAAGAAAGCAACGCGAAATTGAATTCACTTTTTGCTGAATTTTCAAACGCTGGCTGGAGAGAGTCGCCATTCGTATTGGGGCATTGTTGTTCCGAACGGAAGCGGAGAATCTTTCAGATACTTATCGCTCGTCGAGGGATCGAGGATCATGCTAAATTAACTTTAATTGTTCAATTATGCGCGAGAATCTCGCGCACAGATCACTTCGGGGTGTCTGAACCTGAAACG	chr2R_8344334_8344582_+_dCP_twist_center81	twist	GCAGCTG	81	Trl	GAGAGAG	178	159	155	11	6	12	0.969362	5.06758	-4.09821	3.19268	-1.8749	-2.22331
chr2R_8344334_8344582_+_dCP_twist_center81_to_ETS	chr2R_8344334_8344582	+	TAGCTGATAGCTGATAGCTGCAAAGAAAGCAACGCGAAATTGAATTCACTTTTTGCTGAATTTTCAAACGCTGGCTACCGGAAGTCGCCATTCGTATTGGGGCATTGTTGTTCCGAACGGAAGCGGAGAATCTTTCAGATACTTATCGCTCGTCGAGGGATCGAGGATCATGCTAAATTAACTTTAATTGTTCAATTATGCGCGAGAATCTCGCGCACAGATCACTTCGGGGTGTCTGAACCTGAAACG	chr2R_8344334_8344582_+_dCP_twist_center81	twist	GGCAGCTGT	81	ETS	ACCGGAAGT	224	189	204	128	79	102	4.05479	5.06758	-1.01278	3.19268	-1.8749	0.862118
chr2R_8344334_8344582_+_dCP_twist_center81_to_SREBP	chr2R_8344334_8344582	+	TAGCTGATAGCTGATAGCTGCAAAGAAAGCAACGCGAAATTGAATTCACTTTTTGCTGAATTTTCAAACGCTGGCTATCACGCGACGCCATTCGTATTGGGGCATTGTTGTTCCGAACGGAAGCGGAGAATCTTTCAGATACTTATCGCTCGTCGAGGGATCGAGGATCATGCTAAATTAACTTTAATTGTTCAATTATGCGCGAGAATCTCGCGCACAGATCACTTCGGGGTGTCTGAACCTGAAACG	chr2R_8344334_8344582_+_dCP_twist_center81	twist	GGCAGCTGTC	81	SREBP	ATCACGCGAC	96	71	72	84	69	52	4.85754	5.06758	-0.210038	3.19268	-1.8749	1.66486
chr2R_8344334_8344582_+_dCP_twist_center81_to_Stat92E	chr2R_8344334_8344582	+	TAGCTGATAGCTGATAGCTGCAAAGAAAGCAACGCGAAATTGAATTCACTTTTTGCTGAATTTTCAAACGCTGGCTTTCCCGGAAAGCCATTCGTATTGGGGCATTGTTGTTCCGAACGGAAGCGGAGAATCTTTCAGATACTTATCGCTCGTCGAGGGATCGAGGATCATGCTAAATTAACTTTAATTGTTCAATTATGCGCGAGAATCTCGCGCACAGATCACTTCGGGGTGTCTGAACCTGAAACG	chr2R_8344334_8344582_+_dCP_twist_center81	twist	TGGCAGCTGTC	81	Stat92E	TTTCCCGGAAA	91	98	76	4	16	7	1.80414	5.06758	-3.26344	3.19268	-1.8749	-1.38853
chr2R_8344334_8344582_+_dCP_twist_center81_to_Atf2	chr2R_8344334_8344582	+	TAGCTGATAGCTGATAGCTGCAAAGAAAGCAACGCGAAATTGAATTCACTTTTTGCTGAATTTTCAAACGCTGGCATCACGTCATCGCCATTCGTATTGGGGCATTGTTGTTCCGAACGGAAGCGGAGAATCTTTCAGATACTTATCGCTCGTCGAGGGATCGAGGATCATGCTAAATTAACTTTAATTGTTCAATTATGCGCGAGAATCTCGCGCACAGATCACTTCGGGGTGTCTGAACCTGAAACG	chr2R_8344334_8344582_+_dCP_twist_center81	twist	TGGCAGCTGTC	81	Atf2	ATCACGTCATC	212	172	196	207	135	173	4.8829	5.06758	-0.184678	3.19268	-1.8749	1.69022
chrX_393080_393328_+_dCP_twist_center99_to_GATAA	chrX_393080_393328	-	AGCAACCCGTCCGGACTCCGACAAACAAACGAATTGGCACATTCAACCAATTGAGAGCGTCAAATCGCTCTTATCAGTGCTATTCCAGAATGCGAAGATAAGACCGTCACCTTCCAGTCAGACCCTCATCCCCCTCTTCACCATCCACACCCGCATTTCAATCGAGCTAACGACCGCTTTTCTTGATAAGCGACGGTTGCAACTACATAAAAACAAAATGATAAGCTCCGATCCGAAGATGATCAGTGG	chrX_393080_393328_+_dCP_twist_center99	twist	GCATATGG	99	GATAA	AGATAAGA	162	168	159	135	108	128	4.66007	6.23837	-1.5783	4.27943	-1.95894	0.380638
chrX_393080_393328_+_dCP_twist_center99_to_AP1	chrX_393080_393328	-	AGCAACCCGTCCGGACTCCGACAAACAAACGAATTGGCACATTCAACCAATTGAGAGCGTCAAATCGCTCTTATCAGTGCTATTCCAGAATGCGATGAGTCACCCGTCACCTTCCAGTCAGACCCTCATCCCCCTCTTCACCATCCACACCCGCATTTCAATCGAGCTAACGACCGCTTTTCTTGATAAGCGACGGTTGCAACTACATAAAAACAAAATGATAAGCTCCGATCCGAAGATGATCAGTGG	chrX_393080_393328_+_dCP_twist_center99	twist	AGCATATGG	99	AP1	ATGAGTCAC	78	68	68	117	131	165	6.02412	6.23837	-0.214245	4.27943	-1.95894	1.74469
chrX_393080_393328_+_dCP_twist_center99_to_Trl	chrX_393080_393328	-	AGCAACCCGTCCGGACTCCGACAAACAAACGAATTGGCACATTCAACCAATTGAGAGCGTCAAATCGCTCTTATCAGTGCTATTCCAGAATGCGAGAGAGAGGCCGTCACCTTCCAGTCAGACCCTCATCCCCCTCTTCACCATCCACACCCGCATTTCAATCGAGCTAACGACCGCTTTTCTTGATAAGCGACGGTTGCAACTACATAAAAACAAAATGATAAGCTCCGATCCGAAGATGATCAGTGG	chrX_393080_393328_+_dCP_twist_center99	twist	GCATATG	99	Trl	GAGAGAG	256	221	219	177	125	186	4.54217	6.23837	-1.6962	4.27943	-1.95894	0.26274
chrX_393080_393328_+_dCP_twist_center99_to_ETS	chrX_393080_393328	-	AGCAACCCGTCCGGACTCCGACAAACAAACGAATTGGCACATTCAACCAATTGAGAGCGTCAAATCGCTCTTATCAGTGCTATTCCAGAATGCGACCGGAAGTCCGTCACCTTCCAGTCAGACCCTCATCCCCCTCTTCACCATCCACACCCGCATTTCAATCGAGCTAACGACCGCTTTTCTTGATAAGCGACGGTTGCAACTACATAAAAACAAAATGATAAGCTCCGATCCGAAGATGATCAGTGG	chrX_393080_393328_+_dCP_twist_center99	twist	AGCATATGG	99	ETS	ACCGGAAGT	297	262	263	2738	2237	2630	8.27599	6.23837	2.03763	4.27943	-1.95894	3.99657
chrX_393080_393328_+_dCP_twist_center99_to_SREBP	chrX_393080_393328	-	AGCAACCCGTCCGGACTCCGACAAACAAACGAATTGGCACATTCAACCAATTGAGAGCGTCAAATCGCTCTTATCAGTGCTATTCCAGAATGCGATCACGCGACCGTCACCTTCCAGTCAGACCCTCATCCCCCTCTTCACCATCCACACCCGCATTTCAATCGAGCTAACGACCGCTTTTCTTGATAAGCGACGGTTGCAACTACATAAAAACAAAATGATAAGCTCCGATCCGAAGATGATCAGTGG	chrX_393080_393328_+_dCP_twist_center99	twist	AGCATATGGC	99	SREBP	ATCACGCGAC	156	151	160	1682	1499	1882	8.50317	6.23837	2.2648	4.27943	-1.95894	4.22374
chrX_393080_393328_+_dCP_twist_center99_to_Stat92E	chrX_393080_393328	-	AGCAACCCGTCCGGACTCCGACAAACAAACGAATTGGCACATTCAACCAATTGAGAGCGTCAAATCGCTCTTATCAGTGCTATTCCAGAATGCTTTCCCGGAAACGTCACCTTCCAGTCAGACCCTCATCCCCCTCTTCACCATCCACACCCGCATTTCAATCGAGCTAACGACCGCTTTTCTTGATAAGCGACGGTTGCAACTACATAAAAACAAAATGATAAGCTCCGATCCGAAGATGATCAGTGG	chrX_393080_393328_+_dCP_twist_center99	twist	GAGCATATGGC	99	Stat92E	TTTCCCGGAAA	97	77	87	227	202	266	6.47983	6.23837	0.241464	4.27943	-1.95894	2.2004
chrX_393080_393328_+_dCP_twist_center99_to_Atf2	chrX_393080_393328	-	AGCAACCCGTCCGGACTCCGACAAACAAACGAATTGGCACATTCAACCAATTGAGAGCGTCAAATCGCTCTTATCAGTGCTATTCCAGAATGCATCACGTCATCCGTCACCTTCCAGTCAGACCCTCATCCCCCTCTTCACCATCCACACCCGCATTTCAATCGAGCTAACGACCGCTTTTCTTGATAAGCGACGGTTGCAACTACATAAAAACAAAATGATAAGCTCCGATCCGAAGATGATCAGTGG	chrX_393080_393328_+_dCP_twist_center99	twist	GAGCATATGGC	99	Atf2	ATCACGTCATC	105	92	93	157	119	155	5.63072	6.23837	-0.607645	4.27943	-1.95894	1.3513
chr3L_2809847_2810095_+_dCP_twist_center29_to_GATAA	chr3L_2809847_2810095	-	CAAAACTTGGTACCATATCATACCTAGATAAGAACATCATATTACTAAATAGAGAACGCTTATCAGTGCCGAAATTGCCTTCAACAGAATGTTTTATGGGACCCCTTCCCTTATCATCATTCGGATTGTTTTTGTTTTGCTCGATTTCGGGGAAAATCTAGGGCAATTCATGTTTTACTCAATTAGCTGTTCAATGTCGATTTGGGAAGACATTTCATTAATTCCGCCCGGCGCAGCGGAAGTTGCCAA	chr3L_2809847_2810095_+_dCP_twist_center29	twist	ACATATGT	29	GATAA	AGATAAGA	87	54	64	26	19	15	3.29911	3.30501	-0.00589514	1.9364	-1.36861	1.36271
chr3L_2809847_2810095_+_dCP_twist_center29_to_AP1	chr3L_2809847_2810095	-	CAAAACTTGGTACCATATCATACCATGAGTCACACATCATATTACTAAATAGAGAACGCTTATCAGTGCCGAAATTGCCTTCAACAGAATGTTTTATGGGACCCCTTCCCTTATCATCATTCGGATTGTTTTTGTTTTGCTCGATTTCGGGGAAAATCTAGGGCAATTCATGTTTTACTCAATTAGCTGTTCAATGTCGATTTGGGAAGACATTTCATTAATTCCGCCCGGCGCAGCGGAAGTTGCCAA	chr3L_2809847_2810095_+_dCP_twist_center29	twist	TACATATGT	29	AP1	ATGAGTCAC	71	60	68	215	220	239	6.83733	3.30501	3.53233	1.9364	-1.36861	4.90094
chr3L_2809847_2810095_+_dCP_twist_center29_to_Trl	chr3L_2809847_2810095	-	CAAAACTTGGTACCATATCATACCTGAGAGAGTACATCATATTACTAAATAGAGAACGCTTATCAGTGCCGAAATTGCCTTCAACAGAATGTTTTATGGGACCCCTTCCCTTATCATCATTCGGATTGTTTTTGTTTTGCTCGATTTCGGGGAAAATCTAGGGCAATTCATGTTTTACTCAATTAGCTGTTCAATGTCGATTTGGGAAGACATTTCATTAATTCCGCCCGGCGCAGCGGAAGTTGCCAA	chr3L_2809847_2810095_+_dCP_twist_center29	twist	ACATATG	29	Trl	GAGAGAG	70	68	75	5	9	3	1.42231	3.30501	-1.8827	1.9364	-1.36861	-0.514087
chr3L_2809847_2810095_+_dCP_twist_center29_to_ETS	chr3L_2809847_2810095	-	CAAAACTTGGTACCATATCATACCACCGGAAGTACATCATATTACTAAATAGAGAACGCTTATCAGTGCCGAAATTGCCTTCAACAGAATGTTTTATGGGACCCCTTCCCTTATCATCATTCGGATTGTTTTTGTTTTGCTCGATTTCGGGGAAAATCTAGGGCAATTCATGTTTTACTCAATTAGCTGTTCAATGTCGATTTGGGAAGACATTTCATTAATTCCGCCCGGCGCAGCGGAAGTTGCCAA	chr3L_2809847_2810095_+_dCP_twist_center29	twist	TACATATGT	29	ETS	ACCGGAAGT	209	178	181	1548	1435	1645	8.10094	3.30501	4.79594	1.9364	-1.36861	6.16454
chr3L_2809847_2810095_+_dCP_twist_center29_to_SREBP	chr3L_2809847_2810095	-	CAAAACTTGGTACCATATCATACCATCACGCGACCATCATATTACTAAATAGAGAACGCTTATCAGTGCCGAAATTGCCTTCAACAGAATGTTTTATGGGACCCCTTCCCTTATCATCATTCGGATTGTTTTTGTTTTGCTCGATTTCGGGGAAAATCTAGGGCAATTCATGTTTTACTCAATTAGCTGTTCAATGTCGATTTGGGAAGACATTTCATTAATTCCGCCCGGCGCAGCGGAAGTTGCCAA	chr3L_2809847_2810095_+_dCP_twist_center29	twist	TACATATGTA	29	SREBP	ATCACGCGAC	99	103	92	111	123	133	5.39527	3.30501	2.09026	1.9364	-1.36861	3.45887
chr3L_2809847_2810095_+_dCP_twist_center29_to_Stat92E	chr3L_2809847_2810095	-	CAAAACTTGGTACCATATCATACTTTCCCGGAAACATCATATTACTAAATAGAGAACGCTTATCAGTGCCGAAATTGCCTTCAACAGAATGTTTTATGGGACCCCTTCCCTTATCATCATTCGGATTGTTTTTGTTTTGCTCGATTTCGGGGAAAATCTAGGGCAATTCATGTTTTACTCAATTAGCTGTTCAATGTCGATTTGGGAAGACATTTCATTAATTCCGCCCGGCGCAGCGGAAGTTGCCAA	chr3L_2809847_2810095_+_dCP_twist_center29	twist	CTACATATGTA	29	Stat92E	TTTCCCGGAAA	117	89	115	167	165	197	5.79417	3.30501	2.48916	1.9364	-1.36861	3.85777
chr3L_2809847_2810095_+_dCP_twist_center29_to_Atf2	chr3L_2809847_2810095	-	CAAAACTTGGTACCATATCATACATCACGTCATCCATCATATTACTAAATAGAGAACGCTTATCAGTGCCGAAATTGCCTTCAACAGAATGTTTTATGGGACCCCTTCCCTTATCATCATTCGGATTGTTTTTGTTTTGCTCGATTTCGGGGAAAATCTAGGGCAATTCATGTTTTACTCAATTAGCTGTTCAATGTCGATTTGGGAAGACATTTCATTAATTCCGCCCGGCGCAGCGGAAGTTGCCAA	chr3L_2809847_2810095_+_dCP_twist_center29	twist	CTACATATGTA	29	Atf2	ATCACGTCATC	91	79	87	199	195	233	6.35823	3.30501	3.05322	1.9364	-1.36861	4.42183
chr3R_19551420_19551668_+_dCP_twist_center217_to_GATAA	chr3R_19551420_19551668	-	ATGTATGTATGAAGAATGTACATAACATACGAGTGTACGTTTTTTAGGGGGGCATAAAAGTGTATCATGGTGGCGGCAGACTGAAATTCGTCGAAATCAACAAAGCACACGAACTCACACACACACACATGCACGTACACGAATTCTCCATCCAGATGGGCAAAGCTGGCGTTTTTGGATCAGGGCTTAGCACTTTTGGATGGGAATTTACGTAGATAAGACTAAATTTTTGTCTCGCTTATCTCATAT	chr3R_19551420_19551668_+_dCP_twist_center217	twist	GCAGCTGA	217	GATAA	AGATAAGA	63	55	52	47	35	47	4.66067	4.06849	0.592188	0.916498	-3.15199	3.74418
chr3R_19551420_19551668_+_dCP_twist_center217_to_AP1	chr3R_19551420_19551668	-	ATGTATGTATGAAGAATGTACATAACATACGAGTGTACGTTTTTTAGGGGGGCATAAAAGTGTATCATGGTGGCGGCAGACTGAAATTCGTCGAAATCAACAAAGCACACGAACTCACACACACACACATGCACGTACACGAATTCTCCATCCAGATGGGCAAAGCTGGCGTTTTTGGATCAGGGCTTAGCACTTTTGGATGGGAATTTACGATGAGTCACCTAAATTTTTGTCTCGCTTATCTCATAT	chr3R_19551420_19551668_+_dCP_twist_center217	twist	TGCAGCTGA	217	AP1	ATGAGTCAC	125	113	118	152	140	171	5.44586	4.06849	1.37738	0.916498	-3.15199	4.52937
chr3R_19551420_19551668_+_dCP_twist_center217_to_Trl	chr3R_19551420_19551668	-	ATGTATGTATGAAGAATGTACATAACATACGAGTGTACGTTTTTTAGGGGGGCATAAAAGTGTATCATGGTGGCGGCAGACTGAAATTCGTCGAAATCAACAAAGCACACGAACTCACACACACACACATGCACGTACACGAATTCTCCATCCAGATGGGCAAAGCTGGCGTTTTTGGATCAGGGCTTAGCACTTTTGGATGGGAATTTACGTGAGAGAGACTAAATTTTTGTCTCGCTTATCTCATAT	chr3R_19551420_19551668_+_dCP_twist_center217	twist	GCAGCTG	217	Trl	GAGAGAG	107	114	96	19	18	19	2.55962	4.06849	-1.50886	0.916498	-3.15199	1.64312
chr3R_19551420_19551668_+_dCP_twist_center217_to_ETS	chr3R_19551420_19551668	-	ATGTATGTATGAAGAATGTACATAACATACGAGTGTACGTTTTTTAGGGGGGCATAAAAGTGTATCATGGTGGCGGCAGACTGAAATTCGTCGAAATCAACAAAGCACACGAACTCACACACACACACATGCACGTACACGAATTCTCCATCCAGATGGGCAAAGCTGGCGTTTTTGGATCAGGGCTTAGCACTTTTGGATGGGAATTTACGACCGGAAGTCTAAATTTTTGTCTCGCTTATCTCATAT	chr3R_19551420_19551668_+_dCP_twist_center217	twist	TGCAGCTGA	217	ETS	ACCGGAAGT	125	128	116	152	158	148	5.38987	4.06849	1.32138	0.916498	-3.15199	4.47337
chr3R_19551420_19551668_+_dCP_twist_center217_to_SREBP	chr3R_19551420_19551668	-	ATGTATGTATGAAGAATGTACATAACATACGAGTGTACGTTTTTTAGGGGGGCATAAAAGTGTATCATGGTGGCGGCAGACTGAAATTCGTCGAAATCAACAAAGCACACGAACTCACACACACACACATGCACGTACACGAATTCTCCATCCAGATGGGCAAAGCTGGCGTTTTTGGATCAGGGCTTAGCACTTTTGGATGGGAATTTACGATCACGCGACTAAATTTTTGTCTCGCTTATCTCATAT	chr3R_19551420_19551668_+_dCP_twist_center217	twist	TGCAGCTGAC	217	SREBP	ATCACGCGAC	84	75	70	272	272	302	6.96214	4.06849	2.89366	0.916498	-3.15199	6.04565
chr3R_19551420_19551668_+_dCP_twist_center217_to_Stat92E	chr3R_19551420_19551668	-	ATGTATGTATGAAGAATGTACATAACATACGAGTGTACGTTTTTTAGGGGGGCATAAAAGTGTATCATGGTGGCGGCAGACTGAAATTCGTCGAAATCAACAAAGCACACGAACTCACACACACACACATGCACGTACACGAATTCTCCATCCAGATGGGCAAAGCTGGCGTTTTTGGATCAGGGCTTAGCACTTTTGGATGGGAATTTACTTTCCCGGAAATAAATTTTTGTCTCGCTTATCTCATAT	chr3R_19551420_19551668_+_dCP_twist_center217	twist	GTGCAGCTGAC	217	Stat92E	TTTCCCGGAAA	93	54	66	24	13	36	3.50755	4.06849	-0.560935	0.916498	-3.15199	2.59105
chr3R_19551420_19551668_+_dCP_twist_center217_to_Atf2	chr3R_19551420_19551668	-	ATGTATGTATGAAGAATGTACATAACATACGAGTGTACGTTTTTTAGGGGGGCATAAAAGTGTATCATGGTGGCGGCAGACTGAAATTCGTCGAAATCAACAAAGCACACGAACTCACACACACACACATGCACGTACACGAATTCTCCATCCAGATGGGCAAAGCTGGCGTTTTTGGATCAGGGCTTAGCACTTTTGGATGGGAATTTACATCACGTCATCTAAATTTTTGTCTCGCTTATCTCATAT	chr3R_19551420_19551668_+_dCP_twist_center217	twist	GTGCAGCTGAC	217	Atf2	ATCACGTCATC	70	48	58	72	59	84	5.35264	4.06849	1.28415	0.916498	-3.15199	4.43614
chr2L_18984163_18984411_+_dCP_twist_center81_to_GATAA	chr2L_18984163_18984411	+	CCTTATCTTTTTGGGAAGTTTGAGAGAGGCAGCACTGGCTTCCTCTGAAACTCTGACGTCTTAAAACGAATTTGTTTAGATAAGAATTTACTTTGATTATCGGACGGCATGTTCGCAGAAATCCGCTCGCTCGGCTGAATCAGTGGCGAATTGTTTATACAAATTGCTTTGTAAAACGAATTTATTGCGTGACTCAGGCGGCGTTTTGCTTTCGATTCTCGAATATATCTCATGTTTTAATTAAATCCG	chr2L_18984163_18984411_+_dCP_twist_center81	twist	ACATTTGC	81	GATAA	AGATAAGA	99	75	74	134	170	219	6.16262	6.18968	-0.0270604	4.24747	-1.94221	1.91515
chr2L_18984163_18984411_+_dCP_twist_center81_to_AP1	chr2L_18984163_18984411	+	CCTTATCTTTTTGGGAAGTTTGAGAGAGGCAGCACTGGCTTCCTCTGAAACTCTGACGTCTTAAAACGAATTTGTTATGAGTCACATTTACTTTGATTATCGGACGGCATGTTCGCAGAAATCCGCTCGCTCGGCTGAATCAGTGGCGAATTGTTTATACAAATTGCTTTGTAAAACGAATTTATTGCGTGACTCAGGCGGCGTTTTGCTTTCGATTCTCGAATATATCTCATGTTTTAATTAAATCCG	chr2L_18984163_18984411_+_dCP_twist_center81	twist	TACATTTGC	81	AP1	ATGAGTCAC	298	206	273	1119	1453	1602	7.52186	6.18968	1.33218	4.24747	-1.94221	3.27439
chr2L_18984163_18984411_+_dCP_twist_center81_to_Trl	chr2L_18984163_18984411	+	CCTTATCTTTTTGGGAAGTTTGAGAGAGGCAGCACTGGCTTCCTCTGAAACTCTGACGTCTTAAAACGAATTTGTTTGAGAGAGCATTTACTTTGATTATCGGACGGCATGTTCGCAGAAATCCGCTCGCTCGGCTGAATCAGTGGCGAATTGTTTATACAAATTGCTTTGTAAAACGAATTTATTGCGTGACTCAGGCGGCGTTTTGCTTTCGATTCTCGAATATATCTCATGTTTTAATTAAATCCG	chr2L_18984163_18984411_+_dCP_twist_center81	twist	ACATTTG	81	Trl	GAGAGAG	275	275	247	265	367	402	5.46541	6.18968	-0.724269	4.24747	-1.94221	1.21794
chr2L_18984163_18984411_+_dCP_twist_center81_to_ETS	chr2L_18984163_18984411	+	CCTTATCTTTTTGGGAAGTTTGAGAGAGGCAGCACTGGCTTCCTCTGAAACTCTGACGTCTTAAAACGAATTTGTTACCGGAAGTATTTACTTTGATTATCGGACGGCATGTTCGCAGAAATCCGCTCGCTCGGCTGAATCAGTGGCGAATTGTTTATACAAATTGCTTTGTAAAACGAATTTATTGCGTGACTCAGGCGGCGTTTTGCTTTCGATTCTCGAATATATCTCATGTTTTAATTAAATCCG	chr2L_18984163_18984411_+_dCP_twist_center81	twist	TACATTTGC	81	ETS	ACCGGAAGT	143	115	112	437	430	491	6.9548	6.18968	0.765126	4.24747	-1.94221	2.70734
chr2L_18984163_18984411_+_dCP_twist_center81_to_SREBP	chr2L_18984163_18984411	+	CCTTATCTTTTTGGGAAGTTTGAGAGAGGCAGCACTGGCTTCCTCTGAAACTCTGACGTCTTAAAACGAATTTGTTATCACGCGACTTTACTTTGATTATCGGACGGCATGTTCGCAGAAATCCGCTCGCTCGGCTGAATCAGTGGCGAATTGTTTATACAAATTGCTTTGTAAAACGAATTTATTGCGTGACTCAGGCGGCGTTTTGCTTTCGATTCTCGAATATATCTCATGTTTTAATTAAATCCG	chr2L_18984163_18984411_+_dCP_twist_center81	twist	TACATTTGCA	81	SREBP	ATCACGCGAC	149	116	108	229	307	340	6.32832	6.18968	0.138649	4.24747	-1.94221	2.08086
chr2L_18984163_18984411_+_dCP_twist_center81_to_Stat92E	chr2L_18984163_18984411	+	CCTTATCTTTTTGGGAAGTTTGAGAGAGGCAGCACTGGCTTCCTCTGAAACTCTGACGTCTTAAAACGAATTTGTTTTCCCGGAAATTTACTTTGATTATCGGACGGCATGTTCGCAGAAATCCGCTCGCTCGGCTGAATCAGTGGCGAATTGTTTATACAAATTGCTTTGTAAAACGAATTTATTGCGTGACTCAGGCGGCGTTTTGCTTTCGATTCTCGAATATATCTCATGTTTTAATTAAATCCG	chr2L_18984163_18984411_+_dCP_twist_center81	twist	TTACATTTGCA	81	Stat92E	TTTCCCGGAAA	107	91	88	421	497	602	7.49391	6.18968	1.30423	4.24747	-1.94221	3.24644
chr2L_18984163_18984411_+_dCP_twist_center81_to_Atf2	chr2L_18984163_18984411	+	CCTTATCTTTTTGGGAAGTTTGAGAGAGGCAGCACTGGCTTCCTCTGAAACTCTGACGTCTTAAAACGAATTTGTATCACGTCATCTTTACTTTGATTATCGGACGGCATGTTCGCAGAAATCCGCTCGCTCGGCTGAATCAGTGGCGAATTGTTTATACAAATTGCTTTGTAAAACGAATTTATTGCGTGACTCAGGCGGCGTTTTGCTTTCGATTCTCGAATATATCTCATGTTTTAATTAAATCCG	chr2L_18984163_18984411_+_dCP_twist_center81	twist	TTACATTTGCA	81	Atf2	ATCACGTCATC	138	91	124	198	236	279	6.10203	6.18968	-0.0876452	4.24747	-1.94221	1.85456
chr2R_10983325_10983573_+_dCP_twist_center109_to_GATAA	chr2R_10983325_10983573	-	TGCTTTCTTAAGAATTGAGTCCATCAAAATTTGGAGGAATACAAATCTATACTCTCTTTTGTTAGCTGGTCTTTATCGATTCAACGGGAAGCTGAAAATATGCATAGATAAGAGATTATAAGCTGATTAAATCAATTGTTGGTATCGAATTATAAACATGTGTGCCCAATTACCAGGATTTCTATGGATGAAACACGAATGCGTTTTTTAAGGATCATTTAATGAGCTATAACAATGGAAAAAAAGTAA	chr2R_10983325_10983573_+_dCP_twist_center109	twist	ACATATGT	109	GATAA	AGATAAGA	15	19	18	1	1	2	1.35173	4.19786	-2.84613	3.08859	-1.10927	-1.73686
chr2R_10983325_10983573_+_dCP_twist_center109_to_AP1	chr2R_10983325_10983573	-	TGCTTTCTTAAGAATTGAGTCCATCAAAATTTGGAGGAATACAAATCTATACTCTCTTTTGTTAGCTGGTCTTTATCGATTCAACGGGAAGCTGAAAATATGCAATGAGTCACGATTATAAGCTGATTAAATCAATTGTTGGTATCGAATTATAAACATGTGTGCCCAATTACCAGGATTTCTATGGATGAAACACGAATGCGTTTTTTAAGGATCATTTAATGAGCTATAACAATGGAAAAAAAGTAA	chr2R_10983325_10983573_+_dCP_twist_center109	twist	TACATATGT	109	AP1	ATGAGTCAC	43	40	40	126	68	89	6.24702	4.19786	2.04916	3.08859	-1.10927	3.15843
chr2R_10983325_10983573_+_dCP_twist_center109_to_Trl	chr2R_10983325_10983573	-	TGCTTTCTTAAGAATTGAGTCCATCAAAATTTGGAGGAATACAAATCTATACTCTCTTTTGTTAGCTGGTCTTTATCGATTCAACGGGAAGCTGAAAATATGCATGAGAGAGTGATTATAAGCTGATTAAATCAATTGTTGGTATCGAATTATAAACATGTGTGCCCAATTACCAGGATTTCTATGGATGAAACACGAATGCGTTTTTTAAGGATCATTTAATGAGCTATAACAATGGAAAAAAAGTAA	chr2R_10983325_10983573_+_dCP_twist_center109	twist	ACATATG	109	Trl	GAGAGAG	21	19	19	3	1	6	2.49111	4.19786	-1.70675	3.08859	-1.10927	-0.597483
chr2R_10983325_10983573_+_dCP_twist_center109_to_ETS	chr2R_10983325_10983573	-	TGCTTTCTTAAGAATTGAGTCCATCAAAATTTGGAGGAATACAAATCTATACTCTCTTTTGTTAGCTGGTCTTTATCGATTCAACGGGAAGCTGAAAATATGCAACCGGAAGTGATTATAAGCTGATTAAATCAATTGTTGGTATCGAATTATAAACATGTGTGCCCAATTACCAGGATTTCTATGGATGAAACACGAATGCGTTTTTTAAGGATCATTTAATGAGCTATAACAATGGAAAAAAAGTAA	chr2R_10983325_10983573_+_dCP_twist_center109	twist	TACATATGT	109	ETS	ACCGGAAGT	43	27	26	152	58	100	6.72548	4.19786	2.52762	3.08859	-1.10927	3.63689
chr2R_10983325_10983573_+_dCP_twist_center109_to_SREBP	chr2R_10983325_10983573	-	TGCTTTCTTAAGAATTGAGTCCATCAAAATTTGGAGGAATACAAATCTATACTCTCTTTTGTTAGCTGGTCTTTATCGATTCAACGGGAAGCTGAAAATATGCAATCACGCGACATTATAAGCTGATTAAATCAATTGTTGGTATCGAATTATAAACATGTGTGCCCAATTACCAGGATTTCTATGGATGAAACACGAATGCGTTTTTTAAGGATCATTTAATGAGCTATAACAATGGAAAAAAAGTAA	chr2R_10983325_10983573_+_dCP_twist_center109	twist	TACATATGTG	109	SREBP	ATCACGCGAC	NA	NA	NA	NA	NA	NA	NA	4.19786	NA	3.08859	-1.10927	NA
chr2R_10983325_10983573_+_dCP_twist_center109_to_Stat92E	chr2R_10983325_10983573	-	TGCTTTCTTAAGAATTGAGTCCATCAAAATTTGGAGGAATACAAATCTATACTCTCTTTTGTTAGCTGGTCTTTATCGATTCAACGGGAAGCTGAAAATATGCTTTCCCGGAAAATTATAAGCTGATTAAATCAATTGTTGGTATCGAATTATAAACATGTGTGCCCAATTACCAGGATTTCTATGGATGAAACACGAATGCGTTTTTTAAGGATCATTTAATGAGCTATAACAATGGAAAAAAAGTAA	chr2R_10983325_10983573_+_dCP_twist_center109	twist	ATACATATGTG	109	Stat92E	TTTCCCGGAAA	20	14	16	3	3	2	2.42088	4.19786	-1.77698	3.08859	-1.10927	-0.667716
chr2R_10983325_10983573_+_dCP_twist_center109_to_Atf2	chr2R_10983325_10983573	-	TGCTTTCTTAAGAATTGAGTCCATCAAAATTTGGAGGAATACAAATCTATACTCTCTTTTGTTAGCTGGTCTTTATCGATTCAACGGGAAGCTGAAAATATGCATCACGTCATCATTATAAGCTGATTAAATCAATTGTTGGTATCGAATTATAAACATGTGTGCCCAATTACCAGGATTTCTATGGATGAAACACGAATGCGTTTTTTAAGGATCATTTAATGAGCTATAACAATGGAAAAAAAGTAA	chr2R_10983325_10983573_+_dCP_twist_center109	twist	ATACATATGTG	109	Atf2	ATCACGTCATC	18	24	31	69	35	43	6.04464	4.19786	1.84678	3.08859	-1.10927	2.95605
chr3L_632626_632874_+_dCP_twist_center102_to_GATAA	chr3L_632626_632874	-	CACTAAGAATTCTCTGAAATTCTAACGACCCTTGGTATTTATAGAGATTAGAAAACGGCAACGATTTGATAGTTCCCAGAATAGGAAATCGAATTTGCAGATAAGAAGATTGAGTCACAGGCGACCTATGAACCAGAACCAATCCATGACCAGCTCCAAGTCCATATACAAATAAGCCCAGAATAGCCGAGAAAGTAGCCATGCCACTTAGTCACTTTCGGGGAAACTCGATGAGTACGATCAACGACC	chr3L_632626_632874_+_dCP_twist_center102	twist	ACATTTGC	102	GATAA	AGATAAGA	50	34	53	54	69	93	5.73481	3.80355	1.93126	2.62212	-1.18143	3.11269
chr3L_632626_632874_+_dCP_twist_center102_to_AP1	chr3L_632626_632874	-	CACTAAGAATTCTCTGAAATTCTAACGACCCTTGGTATTTATAGAGATTAGAAAACGGCAACGATTTGATAGTTCCCAGAATAGGAAATCGAATTTGATGAGTCACAGATTGAGTCACAGGCGACCTATGAACCAGAACCAATCCATGACCAGCTCCAAGTCCATATACAAATAAGCCCAGAATAGCCGAGAAAGTAGCCATGCCACTTAGTCACTTTCGGGGAAACTCGATGAGTACGATCAACGACC	chr3L_632626_632874_+_dCP_twist_center102	twist	CACATTTGC	102	AP1	ATGAGTCAC	121	103	114	72	72	82	4.48947	3.80355	0.685922	2.62212	-1.18143	1.86735
chr3L_632626_632874_+_dCP_twist_center102_to_Trl	chr3L_632626_632874	-	CACTAAGAATTCTCTGAAATTCTAACGACCCTTGGTATTTATAGAGATTAGAAAACGGCAACGATTTGATAGTTCCCAGAATAGGAAATCGAATTTGCGAGAGAGCAGATTGAGTCACAGGCGACCTATGAACCAGAACCAATCCATGACCAGCTCCAAGTCCATATACAAATAAGCCCAGAATAGCCGAGAAAGTAGCCATGCCACTTAGTCACTTTCGGGGAAACTCGATGAGTACGATCAACGACC	chr3L_632626_632874_+_dCP_twist_center102	twist	ACATTTG	102	Trl	GAGAGAG	65	51	60	26	36	48	4.39729	3.80355	0.593745	2.62212	-1.18143	1.77517
chr3L_632626_632874_+_dCP_twist_center102_to_ETS	chr3L_632626_632874	-	CACTAAGAATTCTCTGAAATTCTAACGACCCTTGGTATTTATAGAGATTAGAAAACGGCAACGATTTGATAGTTCCCAGAATAGGAAATCGAATTTGACCGGAAGTAGATTGAGTCACAGGCGACCTATGAACCAGAACCAATCCATGACCAGCTCCAAGTCCATATACAAATAAGCCCAGAATAGCCGAGAAAGTAGCCATGCCACTTAGTCACTTTCGGGGAAACTCGATGAGTACGATCAACGACC	chr3L_632626_632874_+_dCP_twist_center102	twist	CACATTTGC	102	ETS	ACCGGAAGT	53	40	40	42	62	69	5.46969	3.80355	1.66614	2.62212	-1.18143	2.84757
chr3L_632626_632874_+_dCP_twist_center102_to_SREBP	chr3L_632626_632874	-	CACTAAGAATTCTCTGAAATTCTAACGACCCTTGGTATTTATAGAGATTAGAAAACGGCAACGATTTGATAGTTCCCAGAATAGGAAATCGAATTTGATCACGCGACGATTGAGTCACAGGCGACCTATGAACCAGAACCAATCCATGACCAGCTCCAAGTCCATATACAAATAAGCCCAGAATAGCCGAGAAAGTAGCCATGCCACTTAGTCACTTTCGGGGAAACTCGATGAGTACGATCAACGACC	chr3L_632626_632874_+_dCP_twist_center102	twist	CACATTTGCA	102	SREBP	ATCACGCGAC	85	94	78	188	233	248	6.46322	3.80355	2.65968	2.62212	-1.18143	3.8411
chr3L_632626_632874_+_dCP_twist_center102_to_Stat92E	chr3L_632626_632874	-	CACTAAGAATTCTCTGAAATTCTAACGACCCTTGGTATTTATAGAGATTAGAAAACGGCAACGATTTGATAGTTCCCAGAATAGGAAATCGAATTTTTTCCCGGAAAGATTGAGTCACAGGCGACCTATGAACCAGAACCAATCCATGACCAGCTCCAAGTCCATATACAAATAAGCCCAGAATAGCCGAGAAAGTAGCCATGCCACTTAGTCACTTTCGGGGAAACTCGATGAGTACGATCAACGACC	chr3L_632626_632874_+_dCP_twist_center102	twist	GCACATTTGCA	102	Stat92E	TTTCCCGGAAA	32	31	32	14	24	16	4.26936	3.80355	0.465818	2.62212	-1.18143	1.64725
chr3L_632626_632874_+_dCP_twist_center102_to_Atf2	chr3L_632626_632874	-	CACTAAGAATTCTCTGAAATTCTAACGACCCTTGGTATTTATAGAGATTAGAAAACGGCAACGATTTGATAGTTCCCAGAATAGGAAATCGAATTTATCACGTCATCGATTGAGTCACAGGCGACCTATGAACCAGAACCAATCCATGACCAGCTCCAAGTCCATATACAAATAAGCCCAGAATAGCCGAGAAAGTAGCCATGCCACTTAGTCACTTTCGGGGAAACTCGATGAGTACGATCAACGACC	chr3L_632626_632874_+_dCP_twist_center102	twist	GCACATTTGCA	102	Atf2	ATCACGTCATC	56	40	54	10	17	11	3.10154	3.80355	-0.702001	2.62212	-1.18143	0.479428
chr2L_18954502_18954750_+_dCP_twist_center155_to_GATAA	chr2L_18954502_18954750	-	GTCGACTTAGCAGATGCGACATCCCGAGCAGAGTCACTCGGAAGCCAGAACCACGCACAGCGGCGCTTTGACGATTTCATCAGCTTCATCAGCCTCGTGGAGGGGGAGTCGCAGTCCACCCGGACAATCCAATCTGGCTGGCCAGCGTCTGAGATAAGAGCACCGGGCTTATCACCCACTTGGTGGGGGCACTCTCATGTTTGTGTTTGCCGTTTTGTTTTGTTATAAATTATTATAAATATTATAAAT	chr2L_18954502_18954750_+_dCP_twist_center155	twist	GCAGCTGT	155	GATAA	AGATAAGA	246	222	204	115	145	168	4.43283	3.33475	1.09808	0.906351	-2.4284	3.52648
chr2L_18954502_18954750_+_dCP_twist_center155_to_AP1	chr2L_18954502_18954750	-	GTCGACTTAGCAGATGCGACATCCCGAGCAGAGTCACTCGGAAGCCAGAACCACGCACAGCGGCGCTTTGACGATTTCATCAGCTTCATCAGCCTCGTGGAGGGGGAGTCGCAGTCCACCCGGACAATCCAATCTGGCTGGCCAGCGTCTATGAGTCACGCACCGGGCTTATCACCCACTTGGTGGGGGCACTCTCATGTTTGTGTTTGCCGTTTTGTTTTGTTATAAATTATTATAAATATTATAAAT	chr2L_18954502_18954750_+_dCP_twist_center155	twist	GGCAGCTGT	155	AP1	ATGAGTCAC	397	328	347	314	393	434	5.1798	3.33475	1.84505	0.906351	-2.4284	4.27345
chr2L_18954502_18954750_+_dCP_twist_center155_to_Trl	chr2L_18954502_18954750	-	GTCGACTTAGCAGATGCGACATCCCGAGCAGAGTCACTCGGAAGCCAGAACCACGCACAGCGGCGCTTTGACGATTTCATCAGCTTCATCAGCCTCGTGGAGGGGGAGTCGCAGTCCACCCGGACAATCCAATCTGGCTGGCCAGCGTCTGGAGAGAGTGCACCGGGCTTATCACCCACTTGGTGGGGGCACTCTCATGTTTGTGTTTGCCGTTTTGTTTTGTTATAAATTATTATAAATATTATAAAT	chr2L_18954502_18954750_+_dCP_twist_center155	twist	GCAGCTG	155	Trl	GAGAGAG	313	278	323	28	23	22	1.41444	3.33475	-1.92031	0.906351	-2.4284	0.508084
chr2L_18954502_18954750_+_dCP_twist_center155_to_ETS	chr2L_18954502_18954750	-	GTCGACTTAGCAGATGCGACATCCCGAGCAGAGTCACTCGGAAGCCAGAACCACGCACAGCGGCGCTTTGACGATTTCATCAGCTTCATCAGCCTCGTGGAGGGGGAGTCGCAGTCCACCCGGACAATCCAATCTGGCTGGCCAGCGTCTACCGGAAGTGCACCGGGCTTATCACCCACTTGGTGGGGGCACTCTCATGTTTGTGTTTGCCGTTTTGTTTTGTTATAAATTATTATAAATATTATAAAT	chr2L_18954502_18954750_+_dCP_twist_center155	twist	GGCAGCTGT	155	ETS	ACCGGAAGT	137	124	120	205	201	217	5.78428	3.33475	2.44953	0.906351	-2.4284	4.87793
chr2L_18954502_18954750_+_dCP_twist_center155_to_SREBP	chr2L_18954502_18954750	-	GTCGACTTAGCAGATGCGACATCCCGAGCAGAGTCACTCGGAAGCCAGAACCACGCACAGCGGCGCTTTGACGATTTCATCAGCTTCATCAGCCTCGTGGAGGGGGAGTCGCAGTCCACCCGGACAATCCAATCTGGCTGGCCAGCGTCTATCACGCGACCACCGGGCTTATCACCCACTTGGTGGGGGCACTCTCATGTTTGTGTTTGCCGTTTTGTTTTGTTATAAATTATTATAAATATTATAAAT	chr2L_18954502_18954750_+_dCP_twist_center155	twist	GGCAGCTGTG	155	SREBP	ATCACGCGAC	245	245	222	217	213	284	5.07	3.33475	1.73525	0.906351	-2.4284	4.16365
chr2L_18954502_18954750_+_dCP_twist_center155_to_Stat92E	chr2L_18954502_18954750	-	GTCGACTTAGCAGATGCGACATCCCGAGCAGAGTCACTCGGAAGCCAGAACCACGCACAGCGGCGCTTTGACGATTTCATCAGCTTCATCAGCCTCGTGGAGGGGGAGTCGCAGTCCACCCGGACAATCCAATCTGGCTGGCCAGCGTCTTTCCCGGAAACACCGGGCTTATCACCCACTTGGTGGGGGCACTCTCATGTTTGTGTTTGCCGTTTTGTTTTGTTATAAATTATTATAAATATTATAAAT	chr2L_18954502_18954750_+_dCP_twist_center155	twist	TGGCAGCTGTG	155	Stat92E	TTTCCCGGAAA	232	230	208	472	446	561	6.21	3.33475	2.87525	0.906351	-2.4284	5.30365
chr2L_18954502_18954750_+_dCP_twist_center155_to_Atf2	chr2L_18954502_18954750	-	GTCGACTTAGCAGATGCGACATCCCGAGCAGAGTCACTCGGAAGCCAGAACCACGCACAGCGGCGCTTTGACGATTTCATCAGCTTCATCAGCCTCGTGGAGGGGGAGTCGCAGTCCACCCGGACAATCCAATCTGGCTGGCCAGCGTCATCACGTCATCCACCGGGCTTATCACCCACTTGGTGGGGGCACTCTCATGTTTGTGTTTGCCGTTTTGTTTTGTTATAAATTATTATAAATATTATAAAT	chr2L_18954502_18954750_+_dCP_twist_center155	twist	TGGCAGCTGTG	155	Atf2	ATCACGTCATC	169	124	128	137	169	181	5.30236	3.33475	1.96761	0.906351	-2.4284	4.39601
chr2L_16721175_16721423_+_dCP_twist_center73_to_GATAA	chr2L_16721175_16721423	+	GGCGACTGGCAAATATAAGCGAGTGAGACACAAAGAGAGTGTGAGAAGGAGAGAAAGAGTGTGGGGGCAAGATAAGACCAGCGTCTGAAGCTTTTTCAAAGTGTGTTTCTGATGACGTTGCGACGCCCTCCACGCGCGTATTAGTGAGAGCAAAGTATGTGGGTTAAAAAGGGGGTGGCCGCAAATGGAAATGCAGACTACGTTAGATAATAATTTCGGGCCTTATCAGAAACAACAGCCGACTAATGC	chr2L_16721175_16721423_+_dCP_twist_center73	twist	ACATGTGA	73	GATAA	AGATAAGA	93	71	67	49	37	58	4.37884	4.02905	0.34979	1.89791	-2.13114	2.48092
chr2L_16721175_16721423_+_dCP_twist_center73_to_AP1	chr2L_16721175_16721423	+	GGCGACTGGCAAATATAAGCGAGTGAGACACAAAGAGAGTGTGAGAAGGAGAGAAAGAGTGTGGGGGCATGAGTCACCCAGCGTCTGAAGCTTTTTCAAAGTGTGTTTCTGATGACGTTGCGACGCCCTCCACGCGCGTATTAGTGAGAGCAAAGTATGTGGGTTAAAAAGGGGGTGGCCGCAAATGGAAATGCAGACTACGTTAGATAATAATTTCGGGCCTTATCAGAAACAACAGCCGACTAATGC	chr2L_16721175_16721423_+_dCP_twist_center73	twist	AACATGTGA	73	AP1	ATGAGTCAC	85	53	69	22	27	28	3.65344	4.02905	-0.375606	1.89791	-2.13114	1.75553
chr2L_16721175_16721423_+_dCP_twist_center73_to_Trl	chr2L_16721175_16721423	+	GGCGACTGGCAAATATAAGCGAGTGAGACACAAAGAGAGTGTGAGAAGGAGAGAAAGAGTGTGGGGGCAGAGAGAGACCAGCGTCTGAAGCTTTTTCAAAGTGTGTTTCTGATGACGTTGCGACGCCCTCCACGCGCGTATTAGTGAGAGCAAAGTATGTGGGTTAAAAAGGGGGTGGCCGCAAATGGAAATGCAGACTACGTTAGATAATAATTTCGGGCCTTATCAGAAACAACAGCCGACTAATGC	chr2L_16721175_16721423_+_dCP_twist_center73	twist	ACATGTG	73	Trl	GAGAGAG	120	114	106	50	35	36	3.5679	4.02905	-0.461149	1.89791	-2.13114	1.66999
chr2L_16721175_16721423_+_dCP_twist_center73_to_ETS	chr2L_16721175_16721423	+	GGCGACTGGCAAATATAAGCGAGTGAGACACAAAGAGAGTGTGAGAAGGAGAGAAAGAGTGTGGGGGCACCGGAAGTCCAGCGTCTGAAGCTTTTTCAAAGTGTGTTTCTGATGACGTTGCGACGCCCTCCACGCGCGTATTAGTGAGAGCAAAGTATGTGGGTTAAAAAGGGGGTGGCCGCAAATGGAAATGCAGACTACGTTAGATAATAATTTCGGGCCTTATCAGAAACAACAGCCGACTAATGC	chr2L_16721175_16721423_+_dCP_twist_center73	twist	AACATGTGA	73	ETS	ACCGGAAGT	57	46	49	41	28	29	4.42736	4.02905	0.398311	1.89791	-2.13114	2.52945
chr2L_16721175_16721423_+_dCP_twist_center73_to_SREBP	chr2L_16721175_16721423	+	GGCGACTGGCAAATATAAGCGAGTGAGACACAAAGAGAGTGTGAGAAGGAGAGAAAGAGTGTGGGGGCATCACGCGACCAGCGTCTGAAGCTTTTTCAAAGTGTGTTTCTGATGACGTTGCGACGCCCTCCACGCGCGTATTAGTGAGAGCAAAGTATGTGGGTTAAAAAGGGGGTGGCCGCAAATGGAAATGCAGACTACGTTAGATAATAATTTCGGGCCTTATCAGAAACAACAGCCGACTAATGC	chr2L_16721175_16721423_+_dCP_twist_center73	twist	AACATGTGAC	73	SREBP	ATCACGCGAC	56	48	50	92	95	101	5.97849	4.02905	1.94944	1.89791	-2.13114	4.08058
chr2L_16721175_16721423_+_dCP_twist_center73_to_Stat92E	chr2L_16721175_16721423	+	GGCGACTGGCAAATATAAGCGAGTGAGACACAAAGAGAGTGTGAGAAGGAGAGAAAGAGTGTGGGGGTTTCCCGGAAACAGCGTCTGAAGCTTTTTCAAAGTGTGTTTCTGATGACGTTGCGACGCCCTCCACGCGCGTATTAGTGAGAGCAAAGTATGTGGGTTAAAAAGGGGGTGGCCGCAAATGGAAATGCAGACTACGTTAGATAATAATTTCGGGCCTTATCAGAAACAACAGCCGACTAATGC	chr2L_16721175_16721423_+_dCP_twist_center73	twist	CAACATGTGAC	73	Stat92E	TTTCCCGGAAA	107	76	100	20	23	24	2.99403	4.02905	-1.03502	1.89791	-2.13114	1.09612
chr2L_16721175_16721423_+_dCP_twist_center73_to_Atf2	chr2L_16721175_16721423	+	GGCGACTGGCAAATATAAGCGAGTGAGACACAAAGAGAGTGTGAGAAGGAGAGAAAGAGTGTGGGGGATCACGTCATCCAGCGTCTGAAGCTTTTTCAAAGTGTGTTTCTGATGACGTTGCGACGCCCTCCACGCGCGTATTAGTGAGAGCAAAGTATGTGGGTTAAAAAGGGGGTGGCCGCAAATGGAAATGCAGACTACGTTAGATAATAATTTCGGGCCTTATCAGAAACAACAGCCGACTAATGC	chr2L_16721175_16721423_+_dCP_twist_center73	twist	CAACATGTGAC	73	Atf2	ATCACGTCATC	116	108	99	52	55	66	4.16861	4.02905	0.139562	1.89791	-2.13114	2.2707
chrX_13528686_13528934_+_dCP_twist_center129_to_GATAA	chrX_13528686_13528934	-	GCTGTATCGCATGTACATACATATGCATGTATGTACATATTCGTTTTCTCACTTCTCGACAGCAATTTTCATAGAATTCGTAATCGTACCTCGTAAGTGTTGTACATACAAACAAACATACATATAGATAAGAATATTTGGTAGTGCCGAAAAATCGAGAGAATCGCGAGACAGCCGCCAAGCGAAAAGTAAACAAAATCTTATCAGACACCGCTCACGCCCAGCTCATAAAAGATACAGATACATTCG	chrX_13528686_13528934_+_dCP_twist_center129	twist	ACATATGT	129	GATAA	AGATAAGA	35	27	22	124	103	142	7.2002	6.97681	0.223386	4.44228	-2.53452	2.75791
chrX_13528686_13528934_+_dCP_twist_center129_to_AP1	chrX_13528686_13528934	-	GCTGTATCGCATGTACATACATATGCATGTATGTACATATTCGTTTTCTCACTTCTCGACAGCAATTTTCATAGAATTCGTAATCGTACCTCGTAAGTGTTGTACATACAAACAAACATACATAATGAGTCACATATTTGGTAGTGCCGAAAAATCGAGAGAATCGCGAGACAGCCGCCAAGCGAAAAGTAAACAAAATCTTATCAGACACCGCTCACGCCCAGCTCATAAAAGATACAGATACATTCG	chrX_13528686_13528934_+_dCP_twist_center129	twist	TACATATGT	129	AP1	ATGAGTCAC	29	23	28	214	213	221	8.09634	6.97681	1.11953	4.44228	-2.53452	3.65405
chrX_13528686_13528934_+_dCP_twist_center129_to_Trl	chrX_13528686_13528934	-	GCTGTATCGCATGTACATACATATGCATGTATGTACATATTCGTTTTCTCACTTCTCGACAGCAATTTTCATAGAATTCGTAATCGTACCTCGTAAGTGTTGTACATACAAACAAACATACATATGAGAGAGTATATTTGGTAGTGCCGAAAAATCGAGAGAATCGCGAGACAGCCGCCAAGCGAAAAGTAAACAAAATCTTATCAGACACCGCTCACGCCCAGCTCATAAAAGATACAGATACATTCG	chrX_13528686_13528934_+_dCP_twist_center129	twist	ACATATG	129	Trl	GAGAGAG	35	40	40	111	74	151	6.58378	6.97681	-0.393028	4.44228	-2.53452	2.1415
chrX_13528686_13528934_+_dCP_twist_center129_to_ETS	chrX_13528686_13528934	-	GCTGTATCGCATGTACATACATATGCATGTATGTACATATTCGTTTTCTCACTTCTCGACAGCAATTTTCATAGAATTCGTAATCGTACCTCGTAAGTGTTGTACATACAAACAAACATACATAACCGGAAGTATATTTGGTAGTGCCGAAAAATCGAGAGAATCGCGAGACAGCCGCCAAGCGAAAAGTAAACAAAATCTTATCAGACACCGCTCACGCCCAGCTCATAAAAGATACAGATACATTCG	chrX_13528686_13528934_+_dCP_twist_center129	twist	TACATATGT	129	ETS	ACCGGAAGT	27	25	22	310	258	306	8.62808	6.97681	1.65127	4.44228	-2.53452	4.18579
chrX_13528686_13528934_+_dCP_twist_center129_to_SREBP	chrX_13528686_13528934	-	GCTGTATCGCATGTACATACATATGCATGTATGTACATATTCGTTTTCTCACTTCTCGACAGCAATTTTCATAGAATTCGTAATCGTACCTCGTAAGTGTTGTACATACAAACAAACATACATAATCACGCGACTATTTGGTAGTGCCGAAAAATCGAGAGAATCGCGAGACAGCCGCCAAGCGAAAAGTAAACAAAATCTTATCAGACACCGCTCACGCCCAGCTCATAAAAGATACAGATACATTCG	chrX_13528686_13528934_+_dCP_twist_center129	twist	TACATATGTA	129	SREBP	ATCACGCGAC	63	65	51	384	420	469	7.91013	6.97681	0.933323	4.44228	-2.53452	3.46785
chrX_13528686_13528934_+_dCP_twist_center129_to_Stat92E	chrX_13528686_13528934	-	GCTGTATCGCATGTACATACATATGCATGTATGTACATATTCGTTTTCTCACTTCTCGACAGCAATTTTCATAGAATTCGTAATCGTACCTCGTAAGTGTTGTACATACAAACAAACATACATTTTCCCGGAAATATTTGGTAGTGCCGAAAAATCGAGAGAATCGCGAGACAGCCGCCAAGCGAAAAGTAAACAAAATCTTATCAGACACCGCTCACGCCCAGCTCATAAAAGATACAGATACATTCG	chrX_13528686_13528934_+_dCP_twist_center129	twist	ATACATATGTA	129	Stat92E	TTTCCCGGAAA	29	31	20	132	131	161	7.477	6.97681	0.500187	4.44228	-2.53452	3.03471
chrX_13528686_13528934_+_dCP_twist_center129_to_Atf2	chrX_13528686_13528934	-	GCTGTATCGCATGTACATACATATGCATGTATGTACATATTCGTTTTCTCACTTCTCGACAGCAATTTTCATAGAATTCGTAATCGTACCTCGTAAGTGTTGTACATACAAACAAACATACATATCACGTCATCTATTTGGTAGTGCCGAAAAATCGAGAGAATCGCGAGACAGCCGCCAAGCGAAAAGTAAACAAAATCTTATCAGACACCGCTCACGCCCAGCTCATAAAAGATACAGATACATTCG	chrX_13528686_13528934_+_dCP_twist_center129	twist	ATACATATGTA	129	Atf2	ATCACGTCATC	45	30	32	137	121	160	7.0357	6.97681	0.0588919	4.44228	-2.53452	2.59342
chr3L_17951366_17951614_+_dCP_twist_center40_to_GATAA	chr3L_17951366_17951614	+	TAAATATTTTAATAATAATTTATTTAAATGGACAACAGATAAGACTGGCCAGCTCGCTTGGTCTCTCTCTAATCCTGTGCTATCCCTCTCTTTCCCACCGTGATAGCAGCCGATGCTTGTGTGTGTGTGCTTTCATTAATAATGACGCTACGCTTGACCTTGAGCTTTAGAACTTTGTTTGCGTACTTTGTTGTTGCCGAGAGCCGGGACACGTTTTTTTTTTGTTATATAGCACTTTTCTTTATCGCT	chr3L_17951366_17951614_+_dCP_twist_center40	twist	GCATGTGT	40	GATAA	AGATAAGA	220	230	197	321	283	381	5.66717	4.62151	1.04565	2.8211	-1.80041	2.84607
chr3L_17951366_17951614_+_dCP_twist_center40_to_AP1	chr3L_17951366_17951614	+	TAAATATTTTAATAATAATTTATTTAAATGGACAAATGAGTCACCTGGCCAGCTCGCTTGGTCTCTCTCTAATCCTGTGCTATCCCTCTCTTTCCCACCGTGATAGCAGCCGATGCTTGTGTGTGTGTGCTTTCATTAATAATGACGCTACGCTTGACCTTGAGCTTTAGAACTTTGTTTGCGTACTTTGTTGTTGCCGAGAGCCGGGACACGTTTTTTTTTTGTTATATAGCACTTTTCTTTATCGCT	chr3L_17951366_17951614_+_dCP_twist_center40	twist	CGCATGTGT	40	AP1	ATGAGTCAC	210	159	193	142	116	151	4.60553	4.62151	-0.0159798	2.8211	-1.80041	1.78443
chr3L_17951366_17951614_+_dCP_twist_center40_to_Trl	chr3L_17951366_17951614	+	TAAATATTTTAATAATAATTTATTTAAATGGACAACGAGAGAGTCTGGCCAGCTCGCTTGGTCTCTCTCTAATCCTGTGCTATCCCTCTCTTTCCCACCGTGATAGCAGCCGATGCTTGTGTGTGTGTGCTTTCATTAATAATGACGCTACGCTTGACCTTGAGCTTTAGAACTTTGTTTGCGTACTTTGTTGTTGCCGAGAGCCGGGACACGTTTTTTTTTTGTTATATAGCACTTTTCTTTATCGCT	chr3L_17951366_17951614_+_dCP_twist_center40	twist	GCATGTG	40	Trl	GAGAGAG	152	150	136	67	49	61	3.74907	4.62151	-0.87244	2.8211	-1.80041	0.927975
chr3L_17951366_17951614_+_dCP_twist_center40_to_ETS	chr3L_17951366_17951614	+	TAAATATTTTAATAATAATTTATTTAAATGGACAAACCGGAAGTCTGGCCAGCTCGCTTGGTCTCTCTCTAATCCTGTGCTATCCCTCTCTTTCCCACCGTGATAGCAGCCGATGCTTGTGTGTGTGTGCTTTCATTAATAATGACGCTACGCTTGACCTTGAGCTTTAGAACTTTGTTTGCGTACTTTGTTGTTGCCGAGAGCCGGGACACGTTTTTTTTTTGTTATATAGCACTTTTCTTTATCGCT	chr3L_17951366_17951614_+_dCP_twist_center40	twist	CGCATGTGT	40	ETS	ACCGGAAGT	202	184	151	566	567	673	6.82694	4.62151	2.20543	2.8211	-1.80041	4.00585
chr3L_17951366_17951614_+_dCP_twist_center40_to_SREBP	chr3L_17951366_17951614	+	TAAATATTTTAATAATAATTTATTTAAATGGACAAATCACGCGACTGGCCAGCTCGCTTGGTCTCTCTCTAATCCTGTGCTATCCCTCTCTTTCCCACCGTGATAGCAGCCGATGCTTGTGTGTGTGTGCTTTCATTAATAATGACGCTACGCTTGACCTTGAGCTTTAGAACTTTGTTTGCGTACTTTGTTGTTGCCGAGAGCCGGGACACGTTTTTTTTTTGTTATATAGCACTTTTCTTTATCGCT	chr3L_17951366_17951614_+_dCP_twist_center40	twist	CGCATGTGTC	40	SREBP	ATCACGCGAC	273	207	267	690	663	873	6.64661	4.62151	2.0251	2.8211	-1.80041	3.82552
chr3L_17951366_17951614_+_dCP_twist_center40_to_Stat92E	chr3L_17951366_17951614	+	TAAATATTTTAATAATAATTTATTTAAATGGACATTTCCCGGAAATGGCCAGCTCGCTTGGTCTCTCTCTAATCCTGTGCTATCCCTCTCTTTCCCACCGTGATAGCAGCCGATGCTTGTGTGTGTGTGCTTTCATTAATAATGACGCTACGCTTGACCTTGAGCTTTAGAACTTTGTTTGCGTACTTTGTTGTTGCCGAGAGCCGGGACACGTTTTTTTTTTGTTATATAGCACTTTTCTTTATCGCT	chr3L_17951366_17951614_+_dCP_twist_center40	twist	ACGCATGTGTC	40	Stat92E	TTTCCCGGAAA	216	202	162	384	328	432	6.04502	4.62151	1.42351	2.8211	-1.80041	3.22392
chr3L_17951366_17951614_+_dCP_twist_center40_to_Atf2	chr3L_17951366_17951614	+	TAAATATTTTAATAATAATTTATTTAAATGGACAATCACGTCATCTGGCCAGCTCGCTTGGTCTCTCTCTAATCCTGTGCTATCCCTCTCTTTCCCACCGTGATAGCAGCCGATGCTTGTGTGTGTGTGCTTTCATTAATAATGACGCTACGCTTGACCTTGAGCTTTAGAACTTTGTTTGCGTACTTTGTTGTTGCCGAGAGCCGGGACACGTTTTTTTTTTGTTATATAGCACTTTTCTTTATCGCT	chr3L_17951366_17951614_+_dCP_twist_center40	twist	ACGCATGTGTC	40	Atf2	ATCACGTCATC	166	143	141	169	146	194	5.24211	4.62151	0.620602	2.8211	-1.80041	2.42102
chr2R_12578500_12578748_+_dCP_twist_center124_to_GATAA	chr2R_12578500_12578748	+	TATGGCAAAATCAACAAGAAGGAAACTGGGGGAAACAAAGAAGAGACTGGAAACGAGAAGCCCAGGCTTAGGGTTCAGAACAAAAACCCCAAATCGAGGTCGGGAATTGATAACAGCGGAAGATAAGAAGCCTAAAAGCTCGAATTTGGCGATGCCGAGGCACAAAAAATTCATGAGCAGCAGCAAACAAGAAAAGAAAACAAACCAAAGATAAGTGAGTTGAGGAAAAAGAAGCAAAAATAAAATTTC	chr2R_12578500_12578748_+_dCP_twist_center124	twist	GCAGCTGT	124	GATAA	AGATAAGA	NA	NA	NA	NA	NA	NA	NA	5.68959	NA	2.82097	-2.86862	NA
chr2R_12578500_12578748_+_dCP_twist_center124_to_AP1	chr2R_12578500_12578748	+	TATGGCAAAATCAACAAGAAGGAAACTGGGGGAAACAAAGAAGAGACTGGAAACGAGAAGCCCAGGCTTAGGGTTCAGAACAAAAACCCCAAATCGAGGTCGGGAATTGATAACAGCGGATGAGTCACAGCCTAAAAGCTCGAATTTGGCGATGCCGAGGCACAAAAAATTCATGAGCAGCAGCAAACAAGAAAAGAAAACAAACCAAAGATAAGTGAGTTGAGGAAAAAGAAGCAAAAATAAAATTTC	chr2R_12578500_12578748_+_dCP_twist_center124	twist	AGCAGCTGT	124	AP1	ATGAGTCAC	NA	NA	NA	NA	NA	NA	NA	5.68959	NA	2.82097	-2.86862	NA
chr2R_12578500_12578748_+_dCP_twist_center124_to_Trl	chr2R_12578500_12578748	+	TATGGCAAAATCAACAAGAAGGAAACTGGGGGAAACAAAGAAGAGACTGGAAACGAGAAGCCCAGGCTTAGGGTTCAGAACAAAAACCCCAAATCGAGGTCGGGAATTGATAACAGCGGAGAGAGAGTAGCCTAAAAGCTCGAATTTGGCGATGCCGAGGCACAAAAAATTCATGAGCAGCAGCAAACAAGAAAAGAAAACAAACCAAAGATAAGTGAGTTGAGGAAAAAGAAGCAAAAATAAAATTTC	chr2R_12578500_12578748_+_dCP_twist_center124	twist	GCAGCTG	124	Trl	GAGAGAG	NA	NA	NA	NA	NA	NA	NA	5.68959	NA	2.82097	-2.86862	NA
chr2R_12578500_12578748_+_dCP_twist_center124_to_ETS	chr2R_12578500_12578748	+	TATGGCAAAATCAACAAGAAGGAAACTGGGGGAAACAAAGAAGAGACTGGAAACGAGAAGCCCAGGCTTAGGGTTCAGAACAAAAACCCCAAATCGAGGTCGGGAATTGATAACAGCGGACCGGAAGTAGCCTAAAAGCTCGAATTTGGCGATGCCGAGGCACAAAAAATTCATGAGCAGCAGCAAACAAGAAAAGAAAACAAACCAAAGATAAGTGAGTTGAGGAAAAAGAAGCAAAAATAAAATTTC	chr2R_12578500_12578748_+_dCP_twist_center124	twist	AGCAGCTGT	124	ETS	ACCGGAAGT	NA	NA	NA	NA	NA	NA	NA	5.68959	NA	2.82097	-2.86862	NA
chr2R_12578500_12578748_+_dCP_twist_center124_to_SREBP	chr2R_12578500_12578748	+	TATGGCAAAATCAACAAGAAGGAAACTGGGGGAAACAAAGAAGAGACTGGAAACGAGAAGCCCAGGCTTAGGGTTCAGAACAAAAACCCCAAATCGAGGTCGGGAATTGATAACAGCGGATCACGCGACGCCTAAAAGCTCGAATTTGGCGATGCCGAGGCACAAAAAATTCATGAGCAGCAGCAAACAAGAAAAGAAAACAAACCAAAGATAAGTGAGTTGAGGAAAAAGAAGCAAAAATAAAATTTC	chr2R_12578500_12578748_+_dCP_twist_center124	twist	AGCAGCTGTA	124	SREBP	ATCACGCGAC	44	43	30	400	374	463	8.47354	5.68959	2.78395	2.82097	-2.86862	5.65257
chr2R_12578500_12578748_+_dCP_twist_center124_to_Stat92E	chr2R_12578500_12578748	+	TATGGCAAAATCAACAAGAAGGAAACTGGGGGAAACAAAGAAGAGACTGGAAACGAGAAGCCCAGGCTTAGGGTTCAGAACAAAAACCCCAAATCGAGGTCGGGAATTGATAACAGCGTTTCCCGGAAAGCCTAAAAGCTCGAATTTGGCGATGCCGAGGCACAAAAAATTCATGAGCAGCAGCAAACAAGAAAAGAAAACAAACCAAAGATAAGTGAGTTGAGGAAAAAGAAGCAAAAATAAAATTTC	chr2R_12578500_12578748_+_dCP_twist_center124	twist	GAGCAGCTGTA	124	Stat92E	TTTCCCGGAAA	NA	NA	NA	NA	NA	NA	NA	5.68959	NA	2.82097	-2.86862	NA
chr2R_12578500_12578748_+_dCP_twist_center124_to_Atf2	chr2R_12578500_12578748	+	TATGGCAAAATCAACAAGAAGGAAACTGGGGGAAACAAAGAAGAGACTGGAAACGAGAAGCCCAGGCTTAGGGTTCAGAACAAAAACCCCAAATCGAGGTCGGGAATTGATAACAGCGATCACGTCATCGCCTAAAAGCTCGAATTTGGCGATGCCGAGGCACAAAAAATTCATGAGCAGCAGCAAACAAGAAAAGAAAACAAACCAAAGATAAGTGAGTTGAGGAAAAAGAAGCAAAAATAAAATTTC	chr2R_12578500_12578748_+_dCP_twist_center124	twist	GAGCAGCTGTA	124	Atf2	ATCACGTCATC	NA	NA	NA	NA	NA	NA	NA	5.68959	NA	2.82097	-2.86862	NA
chr3L_40162_40410_+_dCP_twist_center177_to_GATAA	chr3L_40162_40410	-	TAAATCGTAAATAATTTTTTCGCTCCTATGAATGGAATGGTGTGGTGGTTTGTGAGCGAGAGCGAAATATTGGTAGTAGTATTTTGAGTACCCCCTTCCTTATTATATTTCTGCTGAAATCCGATAACCAGTGTGCAAGCGAGACAAAAAAATAACAAACAATTATAAGCTATAGATAAGAGTGTGCTGTTGTGGGCGAAAAAAGTTTCAAAACGGGAGAGGGAGGAATTGGAATTTCACAACATTTGA	chr3L_40162_40410_+_dCP_twist_center177	twist	GCAAGTGT	177	GATAA	AGATAAGA	31	13	18	32	61	38	6.21673	4.47544	1.7413	2.5223	-1.95314	3.69443
chr3L_40162_40410_+_dCP_twist_center177_to_AP1	chr3L_40162_40410	-	TAAATCGTAAATAATTTTTTCGCTCCTATGAATGGAATGGTGTGGTGGTTTGTGAGCGAGAGCGAAATATTGGTAGTAGTATTTTGAGTACCCCCTTCCTTATTATATTTCTGCTGAAATCCGATAACCAGTGTGCAAGCGAGACAAAAAAATAACAAACAATTATAAGCTAATGAGTCACGTGTGCTGTTGTGGGCGAAAAAAGTTTCAAAACGGGAGAGGGAGGAATTGGAATTTCACAACATTTGA	chr3L_40162_40410_+_dCP_twist_center177	twist	TGCAAGTGT	177	AP1	ATGAGTCAC	33	33	23	50	61	78	6.16213	4.47544	1.6867	2.5223	-1.95314	3.63984
chr3L_40162_40410_+_dCP_twist_center177_to_Trl	chr3L_40162_40410	-	TAAATCGTAAATAATTTTTTCGCTCCTATGAATGGAATGGTGTGGTGGTTTGTGAGCGAGAGCGAAATATTGGTAGTAGTATTTTGAGTACCCCCTTCCTTATTATATTTCTGCTGAAATCCGATAACCAGTGTGCAAGCGAGACAAAAAAATAACAAACAATTATAAGCTATGAGAGAGTGTGTGCTGTTGTGGGCGAAAAAAGTTTCAAAACGGGAGAGGGAGGAATTGGAATTTCACAACATTTGA	chr3L_40162_40410_+_dCP_twist_center177	twist	GCAAGTG	177	Trl	GAGAGAG	34	20	26	14	15	19	4.3335	4.47544	-0.141939	2.5223	-1.95314	1.8112
chr3L_40162_40410_+_dCP_twist_center177_to_ETS	chr3L_40162_40410	-	TAAATCGTAAATAATTTTTTCGCTCCTATGAATGGAATGGTGTGGTGGTTTGTGAGCGAGAGCGAAATATTGGTAGTAGTATTTTGAGTACCCCCTTCCTTATTATATTTCTGCTGAAATCCGATAACCAGTGTGCAAGCGAGACAAAAAAATAACAAACAATTATAAGCTAACCGGAAGTGTGTGCTGTTGTGGGCGAAAAAAGTTTCAAAACGGGAGAGGGAGGAATTGGAATTTCACAACATTTGA	chr3L_40162_40410_+_dCP_twist_center177	twist	TGCAAGTGT	177	ETS	ACCGGAAGT	38	24	20	98	112	147	7.20741	4.47544	2.73197	2.5223	-1.95314	4.68511
chr3L_40162_40410_+_dCP_twist_center177_to_SREBP	chr3L_40162_40410	-	TAAATCGTAAATAATTTTTTCGCTCCTATGAATGGAATGGTGTGGTGGTTTGTGAGCGAGAGCGAAATATTGGTAGTAGTATTTTGAGTACCCCCTTCCTTATTATATTTCTGCTGAAATCCGATAACCAGTGTGCAAGCGAGACAAAAAAATAACAAACAATTATAAGCTAATCACGCGACTGTGCTGTTGTGGGCGAAAAAAGTTTCAAAACGGGAGAGGGAGGAATTGGAATTTCACAACATTTGA	chr3L_40162_40410_+_dCP_twist_center177	twist	TGCAAGTGTG	177	SREBP	ATCACGCGAC	71	57	55	280	385	446	7.69608	4.47544	3.22064	2.5223	-1.95314	5.17378
chr3L_40162_40410_+_dCP_twist_center177_to_Stat92E	chr3L_40162_40410	-	TAAATCGTAAATAATTTTTTCGCTCCTATGAATGGAATGGTGTGGTGGTTTGTGAGCGAGAGCGAAATATTGGTAGTAGTATTTTGAGTACCCCCTTCCTTATTATATTTCTGCTGAAATCCGATAACCAGTGTGCAAGCGAGACAAAAAAATAACAAACAATTATAAGCTTTTCCCGGAAATGTGCTGTTGTGGGCGAAAAAAGTTTCAAAACGGGAGAGGGAGGAATTGGAATTTCACAACATTTGA	chr3L_40162_40410_+_dCP_twist_center177	twist	ATGCAAGTGTG	177	Stat92E	TTTCCCGGAAA	70	60	59	50	78	69	5.15829	4.47544	0.682854	2.5223	-1.95314	2.63599
chr3L_40162_40410_+_dCP_twist_center177_to_Atf2	chr3L_40162_40410	-	TAAATCGTAAATAATTTTTTCGCTCCTATGAATGGAATGGTGTGGTGGTTTGTGAGCGAGAGCGAAATATTGGTAGTAGTATTTTGAGTACCCCCTTCCTTATTATATTTCTGCTGAAATCCGATAACCAGTGTGCAAGCGAGACAAAAAAATAACAAACAATTATAAGCTATCACGTCATCTGTGCTGTTGTGGGCGAAAAAAGTTTCAAAACGGGAGAGGGAGGAATTGGAATTTCACAACATTTGA	chr3L_40162_40410_+_dCP_twist_center177	twist	ATGCAAGTGTG	177	Atf2	ATCACGTCATC	35	32	42	25	52	45	5.26434	4.47544	0.788903	2.5223	-1.95314	2.74204
chrX_16176292_16176540_+_dCP_twist_center25_to_GATAA	chrX_16176292_16176540	-	CCAGCGATTTGGCAAGACTCAAGATAAGACAATTCCGACTGGAGCTGCCATAAAGCTGATAAGTGAGTTACGGACAAGCTGTGTACACCAATTAGACGTCATGCCTATGGTGCGGCATATACAGATAGCGAGGTCAAGGCGTACAAGTGGCTTCCGATAAGGCAAAAACGCCCCATTTCAAAAAAACCGGAGTGATTAAAGGCAGCCTCAGGCATTTGTACATACATACATCAATCATACTCCTCTAAC	chrX_16176292_16176540_+_dCP_twist_center25	twist	GCACTTGG	25	GATAA	AGATAAGA	180	171	167	142	130	152	4.77757	3.95703	0.820542	2.31698	-1.64005	2.46059
chrX_16176292_16176540_+_dCP_twist_center25_to_AP1	chrX_16176292_16176540	-	CCAGCGATTTGGCAAGACTCATGAGTCACCAATTCCGACTGGAGCTGCCATAAAGCTGATAAGTGAGTTACGGACAAGCTGTGTACACCAATTAGACGTCATGCCTATGGTGCGGCATATACAGATAGCGAGGTCAAGGCGTACAAGTGGCTTCCGATAAGGCAAAAACGCCCCATTTCAAAAAAACCGGAGTGATTAAAGGCAGCCTCAGGCATTTGTACATACATACATCAATCATACTCCTCTAAC	chrX_16176292_16176540_+_dCP_twist_center25	twist	AGCACTTGG	25	AP1	ATGAGTCAC	51	50	55	98	82	71	5.75403	3.95703	1.797	2.31698	-1.64005	3.43705
chrX_16176292_16176540_+_dCP_twist_center25_to_Trl	chrX_16176292_16176540	-	CCAGCGATTTGGCAAGACTCAGAGAGAGGCAATTCCGACTGGAGCTGCCATAAAGCTGATAAGTGAGTTACGGACAAGCTGTGTACACCAATTAGACGTCATGCCTATGGTGCGGCATATACAGATAGCGAGGTCAAGGCGTACAAGTGGCTTCCGATAAGGCAAAAACGCCCCATTTCAAAAAAACCGGAGTGATTAAAGGCAGCCTCAGGCATTTGTACATACATACATCAATCATACTCCTCTAAC	chrX_16176292_16176540_+_dCP_twist_center25	twist	GCACTTG	25	Trl	GAGAGAG	143	123	120	54	48	51	3.73221	3.95703	-0.224817	2.31698	-1.64005	1.41523
chrX_16176292_16176540_+_dCP_twist_center25_to_ETS	chrX_16176292_16176540	-	CCAGCGATTTGGCAAGACTCACCGGAAGTCAATTCCGACTGGAGCTGCCATAAAGCTGATAAGTGAGTTACGGACAAGCTGTGTACACCAATTAGACGTCATGCCTATGGTGCGGCATATACAGATAGCGAGGTCAAGGCGTACAAGTGGCTTCCGATAAGGCAAAAACGCCCCATTTCAAAAAAACCGGAGTGATTAAAGGCAGCCTCAGGCATTTGTACATACATACATCAATCATACTCCTCTAAC	chrX_16176292_16176540_+_dCP_twist_center25	twist	AGCACTTGG	25	ETS	ACCGGAAGT	79	65	54	223	162	189	6.59925	3.95703	2.64222	2.31698	-1.64005	4.28227
chrX_16176292_16176540_+_dCP_twist_center25_to_SREBP	chrX_16176292_16176540	-	CCAGCGATTTGGCAAGACTCATCACGCGACAATTCCGACTGGAGCTGCCATAAAGCTGATAAGTGAGTTACGGACAAGCTGTGTACACCAATTAGACGTCATGCCTATGGTGCGGCATATACAGATAGCGAGGTCAAGGCGTACAAGTGGCTTCCGATAAGGCAAAAACGCCCCATTTCAAAAAAACCGGAGTGATTAAAGGCAGCCTCAGGCATTTGTACATACATACATCAATCATACTCCTCTAAC	chrX_16176292_16176540_+_dCP_twist_center25	twist	AGCACTTGGC	25	SREBP	ATCACGCGAC	136	112	109	376	392	438	6.83783	3.95703	2.88081	2.31698	-1.64005	4.52086
chrX_16176292_16176540_+_dCP_twist_center25_to_Stat92E	chrX_16176292_16176540	-	CCAGCGATTTGGCAAGACTTTTCCCGGAAAAATTCCGACTGGAGCTGCCATAAAGCTGATAAGTGAGTTACGGACAAGCTGTGTACACCAATTAGACGTCATGCCTATGGTGCGGCATATACAGATAGCGAGGTCAAGGCGTACAAGTGGCTTCCGATAAGGCAAAAACGCCCCATTTCAAAAAAACCGGAGTGATTAAAGGCAGCCTCAGGCATTTGTACATACATACATCAATCATACTCCTCTAAC	chrX_16176292_16176540_+_dCP_twist_center25	twist	CAGCACTTGGC	25	Stat92E	TTTCCCGGAAA	64	55	75	16	18	26	3.36812	3.95703	-0.588908	2.31698	-1.64005	1.05114
chrX_16176292_16176540_+_dCP_twist_center25_to_Atf2	chrX_16176292_16176540	-	CCAGCGATTTGGCAAGACTATCACGTCATCAATTCCGACTGGAGCTGCCATAAAGCTGATAAGTGAGTTACGGACAAGCTGTGTACACCAATTAGACGTCATGCCTATGGTGCGGCATATACAGATAGCGAGGTCAAGGCGTACAAGTGGCTTCCGATAAGGCAAAAACGCCCCATTTCAAAAAAACCGGAGTGATTAAAGGCAGCCTCAGGCATTTGTACATACATACATCAATCATACTCCTCTAAC	chrX_16176292_16176540_+_dCP_twist_center25	twist	CAGCACTTGGC	25	Atf2	ATCACGTCATC	40	38	51	13	24	22	3.95098	3.95703	-0.00605036	2.31698	-1.64005	1.634
chr3L_16370422_16370670_+_dCP_twist_center84_to_GATAA	chr3L_16370422_16370670	-	TACTTCATTCTCAGAAAAAACTAATGTTTTCCATAAAGTTAAATCTGATAAGGATATACATAAATTGAATTACCCATAGAAGATAAGAGTGAACATTTGTAGCATGATTTCTTTACCCAAGATAAGAAACATTACTCATTCATGCTATGAAATTTTAAAGGCAGTATTACTTCCGCCATTCCTACAATATATATGAATAGAATATGTTTAACAAGCCTGATTCGGGTAATTTGTTCCGATTTCAATATC	chr3L_16370422_16370670_+_dCP_twist_center84	twist	GCATATGT	84	GATAA	AGATAAGA	16	11	23	29	30	58	6.28223	6.57894	-0.296715	5.46136	-1.11758	0.820862
chr3L_16370422_16370670_+_dCP_twist_center84_to_AP1	chr3L_16370422_16370670	-	TACTTCATTCTCAGAAAAAACTAATGTTTTCCATAAAGTTAAATCTGATAAGGATATACATAAATTGAATTACCCATAGATGAGTCACGTGAACATTTGTAGCATGATTTCTTTACCCAAGATAAGAAACATTACTCATTCATGCTATGAAATTTTAAAGGCAGTATTACTTCCGCCATTCCTACAATATATATGAATAGAATATGTTTAACAAGCCTGATTCGGGTAATTTGTTCCGATTTCAATATC	chr3L_16370422_16370670_+_dCP_twist_center84	twist	AGCATATGT	84	AP1	ATGAGTCAC	21	12	14	114	126	141	8.10383	6.57894	1.52489	5.46136	-1.11758	2.64247
chr3L_16370422_16370670_+_dCP_twist_center84_to_Trl	chr3L_16370422_16370670	-	TACTTCATTCTCAGAAAAAACTAATGTTTTCCATAAAGTTAAATCTGATAAGGATATACATAAATTGAATTACCCATAGAGAGAGAGTGTGAACATTTGTAGCATGATTTCTTTACCCAAGATAAGAAACATTACTCATTCATGCTATGAAATTTTAAAGGCAGTATTACTTCCGCCATTCCTACAATATATATGAATAGAATATGTTTAACAAGCCTGATTCGGGTAATTTGTTCCGATTTCAATATC	chr3L_16370422_16370670_+_dCP_twist_center84	twist	GCATATG	84	Trl	GAGAGAG	20	17	16	50	50	59	6.65487	6.57894	0.0759302	5.46136	-1.11758	1.19351
chr3L_16370422_16370670_+_dCP_twist_center84_to_ETS	chr3L_16370422_16370670	-	TACTTCATTCTCAGAAAAAACTAATGTTTTCCATAAAGTTAAATCTGATAAGGATATACATAAATTGAATTACCCATAGACCGGAAGTGTGAACATTTGTAGCATGATTTCTTTACCCAAGATAAGAAACATTACTCATTCATGCTATGAAATTTTAAAGGCAGTATTACTTCCGCCATTCCTACAATATATATGAATAGAATATGTTTAACAAGCCTGATTCGGGTAATTTGTTCCGATTTCAATATC	chr3L_16370422_16370670_+_dCP_twist_center84	twist	AGCATATGT	84	ETS	ACCGGAAGT	40	29	34	365	427	508	8.74343	6.57894	2.16449	5.46136	-1.11758	3.28207
chr3L_16370422_16370670_+_dCP_twist_center84_to_SREBP	chr3L_16370422_16370670	-	TACTTCATTCTCAGAAAAAACTAATGTTTTCCATAAAGTTAAATCTGATAAGGATATACATAAATTGAATTACCCATAGATCACGCGACTGAACATTTGTAGCATGATTTCTTTACCCAAGATAAGAAACATTACTCATTCATGCTATGAAATTTTAAAGGCAGTATTACTTCCGCCATTCCTACAATATATATGAATAGAATATGTTTAACAAGCCTGATTCGGGTAATTTGTTCCGATTTCAATATC	chr3L_16370422_16370670_+_dCP_twist_center84	twist	AGCATATGTG	84	SREBP	ATCACGCGAC	18	15	17	177	176	222	8.59511	6.57894	2.01617	5.46136	-1.11758	3.13375
chr3L_16370422_16370670_+_dCP_twist_center84_to_Stat92E	chr3L_16370422_16370670	-	TACTTCATTCTCAGAAAAAACTAATGTTTTCCATAAAGTTAAATCTGATAAGGATATACATAAATTGAATTACCCATATTTCCCGGAAATGAACATTTGTAGCATGATTTCTTTACCCAAGATAAGAAACATTACTCATTCATGCTATGAAATTTTAAAGGCAGTATTACTTCCGCCATTCCTACAATATATATGAATAGAATATGTTTAACAAGCCTGATTCGGGTAATTTGTTCCGATTTCAATATC	chr3L_16370422_16370670_+_dCP_twist_center84	twist	GAGCATATGTG	84	Stat92E	TTTCCCGGAAA	NA	NA	NA	NA	NA	NA	NA	6.57894	NA	5.46136	-1.11758	NA
chr3L_16370422_16370670_+_dCP_twist_center84_to_Atf2	chr3L_16370422_16370670	-	TACTTCATTCTCAGAAAAAACTAATGTTTTCCATAAAGTTAAATCTGATAAGGATATACATAAATTGAATTACCCATAATCACGTCATCTGAACATTTGTAGCATGATTTCTTTACCCAAGATAAGAAACATTACTCATTCATGCTATGAAATTTTAAAGGCAGTATTACTTCCGCCATTCCTACAATATATATGAATAGAATATGTTTAACAAGCCTGATTCGGGTAATTTGTTCCGATTTCAATATC	chr3L_16370422_16370670_+_dCP_twist_center84	twist	GAGCATATGTG	84	Atf2	ATCACGTCATC	21	28	23	16	13	17	4.40753	6.57894	-2.17142	5.46136	-1.11758	-1.05384
chrX_2488912_2489160_+_dCP_twist_center184_to_GATAA	chrX_2488912_2489160	+	ACGCTGCCCCAATCTTAGTACTTCCTGGAATCCCCAGTTAGAAAGGCACAATACTGCTCATTTGCTCGTGGGCCGCATTTTTTATTTTATTTTATTTTATTTTTTTTTGCAATCCCTCTAATCATATCGCGCTTAGTCACTAGTCACAATGAACGAGCGAACGGCCAGCGACAAATGGAAAGATAAGAAAACACACAATATCATTCGGATATCGATGGGCTCACACATATAGTTATGGGTGTTGTTTAA	chrX_2488912_2489160_+_dCP_twist_center184	twist	ACATTTGC	184	GATAA	AGATAAGA	69	59	59	65	82	89	5.41858	4.81346	0.605117	2.70014	-2.11333	2.71844
chrX_2488912_2489160_+_dCP_twist_center184_to_AP1	chrX_2488912_2489160	+	ACGCTGCCCCAATCTTAGTACTTCCTGGAATCCCCAGTTAGAAAGGCACAATACTGCTCATTTGCTCGTGGGCCGCATTTTTTATTTTATTTTATTTTATTTTTTTTTGCAATCCCTCTAATCATATCGCGCTTAGTCACTAGTCACAATGAACGAGCGAACGGCCAGCGACAAATGGAATGAGTCACAAACACACAATATCATTCGGATATCGATGGGCTCACACATATAGTTATGGGTGTTGTTTAA	chrX_2488912_2489160_+_dCP_twist_center184	twist	AACATTTGC	184	AP1	ATGAGTCAC	140	113	129	268	287	339	6.3054	4.81346	1.49194	2.70014	-2.11333	3.60526
chrX_2488912_2489160_+_dCP_twist_center184_to_Trl	chrX_2488912_2489160	+	ACGCTGCCCCAATCTTAGTACTTCCTGGAATCCCCAGTTAGAAAGGCACAATACTGCTCATTTGCTCGTGGGCCGCATTTTTTATTTTATTTTATTTTATTTTTTTTTGCAATCCCTCTAATCATATCGCGCTTAGTCACTAGTCACAATGAACGAGCGAACGGCCAGCGACAAATGGAAGAGAGAGCAAACACACAATATCATTCGGATATCGATGGGCTCACACATATAGTTATGGGTGTTGTTTAA	chrX_2488912_2489160_+_dCP_twist_center184	twist	ACATTTG	184	Trl	GAGAGAG	63	85	60	52	57	49	4.67601	4.81346	-0.137451	2.70014	-2.11333	1.97588
chrX_2488912_2489160_+_dCP_twist_center184_to_ETS	chrX_2488912_2489160	+	ACGCTGCCCCAATCTTAGTACTTCCTGGAATCCCCAGTTAGAAAGGCACAATACTGCTCATTTGCTCGTGGGCCGCATTTTTTATTTTATTTTATTTTATTTTTTTTTGCAATCCCTCTAATCATATCGCGCTTAGTCACTAGTCACAATGAACGAGCGAACGGCCAGCGACAAATGGAACCGGAAGTAAACACACAATATCATTCGGATATCGATGGGCTCACACATATAGTTATGGGTGTTGTTTAA	chrX_2488912_2489160_+_dCP_twist_center184	twist	AACATTTGC	184	ETS	ACCGGAAGT	85	77	82	247	234	298	6.74253	4.81346	1.92906	2.70014	-2.11333	4.04239
chrX_2488912_2489160_+_dCP_twist_center184_to_SREBP	chrX_2488912_2489160	+	ACGCTGCCCCAATCTTAGTACTTCCTGGAATCCCCAGTTAGAAAGGCACAATACTGCTCATTTGCTCGTGGGCCGCATTTTTTATTTTATTTTATTTTATTTTTTTTTGCAATCCCTCTAATCATATCGCGCTTAGTCACTAGTCACAATGAACGAGCGAACGGCCAGCGACAAATGGAATCACGCGACAACACACAATATCATTCGGATATCGATGGGCTCACACATATAGTTATGGGTGTTGTTTAA	chrX_2488912_2489160_+_dCP_twist_center184	twist	AACATTTGCA	184	SREBP	ATCACGCGAC	82	67	70	205	220	255	6.71403	4.81346	1.90057	2.70014	-2.11333	4.01389
chrX_2488912_2489160_+_dCP_twist_center184_to_Stat92E	chrX_2488912_2489160	+	ACGCTGCCCCAATCTTAGTACTTCCTGGAATCCCCAGTTAGAAAGGCACAATACTGCTCATTTGCTCGTGGGCCGCATTTTTTATTTTATTTTATTTTATTTTTTTTTGCAATCCCTCTAATCATATCGCGCTTAGTCACTAGTCACAATGAACGAGCGAACGGCCAGCGACAAATGGTTTCCCGGAAAAACACACAATATCATTCGGATATCGATGGGCTCACACATATAGTTATGGGTGTTGTTTAA	chrX_2488912_2489160_+_dCP_twist_center184	twist	AAACATTTGCA	184	Stat92E	TTTCCCGGAAA	77	76	67	87	75	86	5.23687	4.81346	0.42341	2.70014	-2.11333	2.53674
chrX_2488912_2489160_+_dCP_twist_center184_to_Atf2	chrX_2488912_2489160	+	ACGCTGCCCCAATCTTAGTACTTCCTGGAATCCCCAGTTAGAAAGGCACAATACTGCTCATTTGCTCGTGGGCCGCATTTTTTATTTTATTTTATTTTATTTTTTTTTGCAATCCCTCTAATCATATCGCGCTTAGTCACTAGTCACAATGAACGAGCGAACGGCCAGCGACAAATGGATCACGTCATCAACACACAATATCATTCGGATATCGATGGGCTCACACATATAGTTATGGGTGTTGTTTAA	chrX_2488912_2489160_+_dCP_twist_center184	twist	AAACATTTGCA	184	Atf2	ATCACGTCATC	54	45	49	49	44	60	5.11095	4.81346	0.297482	2.70014	-2.11333	2.41081
chr2L_481161_481409_+_dCP_twist_center121_to_GATAA	chr2L_481161_481409	-	GCAAACCCCCACACGCACACAAGCGCACAGATAGGCACGCCACAGACTGCTGGCATTTTCGCCTCGTCTCACTCGCACTCACTCACTCGTCCGCTCAGGCAAAGTATCAACAAATGTAGATAAGAACATCATGAGGTCAACGCGTGATACCAGACGGACCCACACAGACACTCACGCACACCATAAAACACGCAGGCGAGCTGTTCAGCCGTCAAGAAGGTTATTTTCGAGGGGTCCACTTGGGCATAC	chr2L_481161_481409_+_dCP_twist_center121	twist	TCACGTGA	121	GATAA	AGATAAGA	109	123	112	187	159	172	5.65281	4.91653	0.736276	3.18245	-1.73408	2.47036
chr2L_481161_481409_+_dCP_twist_center121_to_AP1	chr2L_481161_481409	-	GCAAACCCCCACACGCACACAAGCGCACAGATAGGCACGCCACAGACTGCTGGCATTTTCGCCTCGTCTCACTCGCACTCACTCACTCGTCCGCTCAGGCAAAGTATCAACAAATGATGAGTCACACATCATGAGGTCAACGCGTGATACCAGACGGACCCACACAGACACTCACGCACACCATAAAACACGCAGGCGAGCTGTTCAGCCGTCAAGAAGGTTATTTTCGAGGGGTCCACTTGGGCATAC	chr2L_481161_481409_+_dCP_twist_center121	twist	TTCACGTGA	121	AP1	ATGAGTCAC	129	126	130	94	110	117	4.81499	4.91653	-0.10154	3.18245	-1.73408	1.63254
chr2L_481161_481409_+_dCP_twist_center121_to_Trl	chr2L_481161_481409	-	GCAAACCCCCACACGCACACAAGCGCACAGATAGGCACGCCACAGACTGCTGGCATTTTCGCCTCGTCTCACTCGCACTCACTCACTCGTCCGCTCAGGCAAAGTATCAACAAATGTGAGAGAGAACATCATGAGGTCAACGCGTGATACCAGACGGACCCACACAGACACTCACGCACACCATAAAACACGCAGGCGAGCTGTTCAGCCGTCAAGAAGGTTATTTTCGAGGGGTCCACTTGGGCATAC	chr2L_481161_481409_+_dCP_twist_center121	twist	TCACGTG	121	Trl	GAGAGAG	67	57	69	23	16	19	3.32239	4.91653	-1.59414	3.18245	-1.73408	0.13994
chr2L_481161_481409_+_dCP_twist_center121_to_ETS	chr2L_481161_481409	-	GCAAACCCCCACACGCACACAAGCGCACAGATAGGCACGCCACAGACTGCTGGCATTTTCGCCTCGTCTCACTCGCACTCACTCACTCGTCCGCTCAGGCAAAGTATCAACAAATGACCGGAAGTACATCATGAGGTCAACGCGTGATACCAGACGGACCCACACAGACACTCACGCACACCATAAAACACGCAGGCGAGCTGTTCAGCCGTCAAGAAGGTTATTTTCGAGGGGTCCACTTGGGCATAC	chr2L_481161_481409_+_dCP_twist_center121	twist	TTCACGTGA	121	ETS	ACCGGAAGT	85	75	65	112	108	135	5.72833	4.91653	0.811804	3.18245	-1.73408	2.54589
chr2L_481161_481409_+_dCP_twist_center121_to_SREBP	chr2L_481161_481409	-	GCAAACCCCCACACGCACACAAGCGCACAGATAGGCACGCCACAGACTGCTGGCATTTTCGCCTCGTCTCACTCGCACTCACTCACTCGTCCGCTCAGGCAAAGTATCAACAAATGATCACGCGACCATCATGAGGTCAACGCGTGATACCAGACGGACCCACACAGACACTCACGCACACCATAAAACACGCAGGCGAGCTGTTCAGCCGTCAAGAAGGTTATTTTCGAGGGGTCCACTTGGGCATAC	chr2L_481161_481409_+_dCP_twist_center121	twist	TTCACGTGAA	121	SREBP	ATCACGCGAC	101	72	70	137	165	212	6.16716	4.91653	1.25063	3.18245	-1.73408	2.98471
chr2L_481161_481409_+_dCP_twist_center121_to_Stat92E	chr2L_481161_481409	-	GCAAACCCCCACACGCACACAAGCGCACAGATAGGCACGCCACAGACTGCTGGCATTTTCGCCTCGTCTCACTCGCACTCACTCACTCGTCCGCTCAGGCAAAGTATCAACAAATTTTCCCGGAAACATCATGAGGTCAACGCGTGATACCAGACGGACCCACACAGACACTCACGCACACCATAAAACACGCAGGCGAGCTGTTCAGCCGTCAAGAAGGTTATTTTCGAGGGGTCCACTTGGGCATAC	chr2L_481161_481409_+_dCP_twist_center121	twist	GTTCACGTGAA	121	Stat92E	TTTCCCGGAAA	83	60	64	19	33	25	3.67025	4.91653	-1.24628	3.18245	-1.73408	0.487805
chr2L_481161_481409_+_dCP_twist_center121_to_Atf2	chr2L_481161_481409	-	GCAAACCCCCACACGCACACAAGCGCACAGATAGGCACGCCACAGACTGCTGGCATTTTCGCCTCGTCTCACTCGCACTCACTCACTCGTCCGCTCAGGCAAAGTATCAACAAATATCACGTCATCCATCATGAGGTCAACGCGTGATACCAGACGGACCCACACAGACACTCACGCACACCATAAAACACGCAGGCGAGCTGTTCAGCCGTCAAGAAGGTTATTTTCGAGGGGTCCACTTGGGCATAC	chr2L_481161_481409_+_dCP_twist_center121	twist	GTTCACGTGAA	121	Atf2	ATCACGTCATC	92	91	90	133	159	186	5.88579	4.91653	0.969262	3.18245	-1.73408	2.70335
chr2R_14434614_14434862_+_dCP_twist_center186_to_GATAA	chr2R_14434614_14434862	-	AGGAGCGTCTGGCTGCGATAAGCCAATCCAAAACATCCGCCATAAACAAGCCGACTATCGCCGAATCTGGAGGCCTGACCACAGCCAATGACTTGCTGAAAAGCAAGACCCGGCATTAAACTTTTAATATACGGAGCCCAACAAAGGAGATGAACACATCCCTCCGCCCGTTTTCTGCGGTCAGATAAGAATGGCATTTGGAATATTTCGCCCCGCAGCCGCTTTTGATAAAAATTCGCTTTTGTATAC	chr2R_14434614_14434862_+_dCP_twist_center186	twist	CCATCTGA	186	GATAA	AGATAAGA	137	132	111	772	686	917	7.70902	6.46266	1.24637	4.51013	-1.95253	3.1989
chr2R_14434614_14434862_+_dCP_twist_center186_to_AP1	chr2R_14434614_14434862	-	AGGAGCGTCTGGCTGCGATAAGCCAATCCAAAACATCCGCCATAAACAAGCCGACTATCGCCGAATCTGGAGGCCTGACCACAGCCAATGACTTGCTGAAAAGCAAGACCCGGCATTAAACTTTTAATATACGGAGCCCAACAAAGGAGATGAACACATCCCTCCGCCCGTTTTCTGCGGTATGAGTCACATGGCATTTGGAATATTTCGCCCCGCAGCCGCTTTTGATAAAAATTCGCTTTTGTATAC	chr2R_14434614_14434862_+_dCP_twist_center186	twist	CCCATCTGA	186	AP1	ATGAGTCAC	71	83	57	337	296	369	7.31078	6.46266	0.848124	4.51013	-1.95253	2.80065
chr2R_14434614_14434862_+_dCP_twist_center186_to_Trl	chr2R_14434614_14434862	-	AGGAGCGTCTGGCTGCGATAAGCCAATCCAAAACATCCGCCATAAACAAGCCGACTATCGCCGAATCTGGAGGCCTGACCACAGCCAATGACTTGCTGAAAAGCAAGACCCGGCATTAAACTTTTAATATACGGAGCCCAACAAAGGAGATGAACACATCCCTCCGCCCGTTTTCTGCGGTCGAGAGAGAATGGCATTTGGAATATTTCGCCCCGCAGCCGCTTTTGATAAAAATTCGCTTTTGTATAC	chr2R_14434614_14434862_+_dCP_twist_center186	twist	CCATCTG	186	Trl	GAGAGAG	111	83	129	361	305	394	6.77754	6.46266	0.314882	4.51013	-1.95253	2.26741
chr2R_14434614_14434862_+_dCP_twist_center186_to_ETS	chr2R_14434614_14434862	-	AGGAGCGTCTGGCTGCGATAAGCCAATCCAAAACATCCGCCATAAACAAGCCGACTATCGCCGAATCTGGAGGCCTGACCACAGCCAATGACTTGCTGAAAAGCAAGACCCGGCATTAAACTTTTAATATACGGAGCCCAACAAAGGAGATGAACACATCCCTCCGCCCGTTTTCTGCGGTACCGGAAGTATGGCATTTGGAATATTTCGCCCCGCAGCCGCTTTTGATAAAAATTCGCTTTTGTATAC	chr2R_14434614_14434862_+_dCP_twist_center186	twist	CCCATCTGA	186	ETS	ACCGGAAGT	136	111	137	767	658	793	7.59721	6.46266	1.13455	4.51013	-1.95253	3.08708
chr2R_14434614_14434862_+_dCP_twist_center186_to_SREBP	chr2R_14434614_14434862	-	AGGAGCGTCTGGCTGCGATAAGCCAATCCAAAACATCCGCCATAAACAAGCCGACTATCGCCGAATCTGGAGGCCTGACCACAGCCAATGACTTGCTGAAAAGCAAGACCCGGCATTAAACTTTTAATATACGGAGCCCAACAAAGGAGATGAACACATCCCTCCGCCCGTTTTCTGCGGTATCACGCGACTGGCATTTGGAATATTTCGCCCCGCAGCCGCTTTTGATAAAAATTCGCTTTTGTATAC	chr2R_14434614_14434862_+_dCP_twist_center186	twist	CCCATCTGAA	186	SREBP	ATCACGCGAC	90	91	88	459	384	487	7.36693	6.46266	0.904272	4.51013	-1.95253	2.8568
chr2R_14434614_14434862_+_dCP_twist_center186_to_Stat92E	chr2R_14434614_14434862	-	AGGAGCGTCTGGCTGCGATAAGCCAATCCAAAACATCCGCCATAAACAAGCCGACTATCGCCGAATCTGGAGGCCTGACCACAGCCAATGACTTGCTGAAAAGCAAGACCCGGCATTAAACTTTTAATATACGGAGCCCAACAAAGGAGATGAACACATCCCTCCGCCCGTTTTCTGCGGTTTCCCGGAAATGGCATTTGGAATATTTCGCCCCGCAGCCGCTTTTGATAAAAATTCGCTTTTGTATAC	chr2R_14434614_14434862_+_dCP_twist_center186	twist	TCCCATCTGAA	186	Stat92E	TTTCCCGGAAA	82	75	65	324	298	331	7.17511	6.46266	0.712452	4.51013	-1.95253	2.66498
chr2R_14434614_14434862_+_dCP_twist_center186_to_Atf2	chr2R_14434614_14434862	-	AGGAGCGTCTGGCTGCGATAAGCCAATCCAAAACATCCGCCATAAACAAGCCGACTATCGCCGAATCTGGAGGCCTGACCACAGCCAATGACTTGCTGAAAAGCAAGACCCGGCATTAAACTTTTAATATACGGAGCCCAACAAAGGAGATGAACACATCCCTCCGCCCGTTTTCTGCGGATCACGTCATCTGGCATTTGGAATATTTCGCCCCGCAGCCGCTTTTGATAAAAATTCGCTTTTGTATAC	chr2R_14434614_14434862_+_dCP_twist_center186	twist	TCCCATCTGAA	186	Atf2	ATCACGTCATC	128	98	112	756	694	804	7.8122	6.46266	1.34955	4.51013	-1.95253	3.30208
chr3L_8685575_8685823_+_dCP_twist_center245_to_GATAA	chr3L_8685575_8685823	+	TGCAATGCGAAGCACGAGCCCCGTCGTTAATTTCACCATTAGCCTCCTCGCACAGTGAACACTCTGATAAGACGCCGGCATGCCGTGCCACACATGCACACACATAAATATATAAAGTAATATATGACTGATTGTCTGCCGAGGCCCAAGACGTCGGTCGTCGTAAACAGCTTATCAGCCGGGCAATGTGGTTACCCGTCGAAAGCGCTGGAACGGCAACCAGATCGGGAACCTGTCACAGAGATAAGA	chr3L_8685575_8685823_+_dCP_twist_center245	twist	ACAGCTGC	245	GATAA	AGATAAGA	145	98	124	294	241	326	6.29677	5.28912	1.00765	3.6279	-1.66122	2.66887
chr3L_8685575_8685823_+_dCP_twist_center245_to_AP1	chr3L_8685575_8685823	+	TGCAATGCGAAGCACGAGCCCCGTCGTTAATTTCACCATTAGCCTCCTCGCACAGTGAACACTCTGATAAGACGCCGGCATGCCGTGCCACACATGCACACACATAAATATATAAAGTAATATATGACTGATTGTCTGCCGAGGCCCAAGACGTCGGTCGTCGTAAACAGCTTATCAGCCGGGCAATGTGGTTACCCGTCGAAAGCGCTGGAACGGCAACCAGATCGGGAACCTGTCACAATGAGTCAC	chr3L_8685575_8685823_+_dCP_twist_center245	twist	GACAGCTGC	245	AP1	ATGAGTCAC	238	187	204	270	316	363	5.6793	5.28912	0.39018	3.6279	-1.66122	2.0514
chr3L_8685575_8685823_+_dCP_twist_center245_to_Trl	chr3L_8685575_8685823	+	TGCAATGCGAAGCACGAGCCCCGTCGTTAATTTCACCATTAGCCTCCTCGCACAGTGAACACTCTGATAAGACGCCGGCATGCCGTGCCACACATGCACACACATAAATATATAAAGTAATATATGACTGATTGTCTGCCGAGGCCCAAGACGTCGGTCGTCGTAAACAGCTTATCAGCCGGGCAATGTGGTTACCCGTCGAAAGCGCTGGAACGGCAACCAGATCGGGAACCTGTCACAGGAGAGAGC	chr3L_8685575_8685823_+_dCP_twist_center245	twist	ACAGCTG	245	Trl	GAGAGAG	96	85	94	36	33	36	3.67498	5.28912	-1.61414	3.6279	-1.66122	0.0470838
chr3L_8685575_8685823_+_dCP_twist_center245_to_ETS	chr3L_8685575_8685823	+	TGCAATGCGAAGCACGAGCCCCGTCGTTAATTTCACCATTAGCCTCCTCGCACAGTGAACACTCTGATAAGACGCCGGCATGCCGTGCCACACATGCACACACATAAATATATAAAGTAATATATGACTGATTGTCTGCCGAGGCCCAAGACGTCGGTCGTCGTAAACAGCTTATCAGCCGGGCAATGTGGTTACCCGTCGAAAGCGCTGGAACGGCAACCAGATCGGGAACCTGTCACAACCGGAAGT	chr3L_8685575_8685823_+_dCP_twist_center245	twist	GACAGCTGC	245	ETS	ACCGGAAGT	82	69	86	328	344	373	7.21933	5.28912	1.93021	3.6279	-1.66122	3.59143
chr3L_8685575_8685823_+_dCP_twist_center245_to_SREBP	chr3L_8685575_8685823	+	TGCAATGCGAAGCACGAGCCCCGTCGTTAATTTCACCATTAGCCTCCTCGCACAGTGAACACTCTGATAAGACGCCGGCATGCCGTGCCACACATGCACACACATAAATATATAAAGTAATATATGACTGATTGTCTGCCGAGGCCCAAGACGTCGGTCGTCGTAAACAGCTTATCAGCCGGGCAATGTGGTTACCCGTCGAAAGCGCTGGAACGGCAACCAGATCGGGAACCTGTCACATCACGCGAC	chr3L_8685575_8685823_+_dCP_twist_center245	twist	AGACAGCTGC	245	SREBP	ATCACGCGAC	71	61	51	254	242	286	7.16994	5.28912	1.88082	3.6279	-1.66122	3.54204
chr3L_8685575_8685823_+_dCP_twist_center245_to_Stat92E	chr3L_8685575_8685823	+	TGCAATGCGAAGCACGAGCCCCGTCGTTAATTTCACCATTAGCCTCCTCGCACAGTGAACACTCTGATAAGACGCCGGCATGCCGTGCCACACATGCACACACATAAATATATAAAGTAATATATGACTGATTGTCTGCCGAGGCCCAAGACGTCGGTCGTCGTAAACAGCTTATCAGCCGGGCAATGTGGTTACCCGTCGAAAGCGCTGGAACGGCAACCAGATCGGGAACCTGTCATTTCCCGGAAA	chr3L_8685575_8685823_+_dCP_twist_center245	twist	CAGACAGCTGC	245	Stat92E	TTTCCCGGAAA	103	94	92	196	243	266	6.37252	5.28912	1.0834	3.6279	-1.66122	2.74462
chr3L_8685575_8685823_+_dCP_twist_center245_to_Atf2	chr3L_8685575_8685823	+	TGCAATGCGAAGCACGAGCCCCGTCGTTAATTTCACCATTAGCCTCCTCGCACAGTGAACACTCTGATAAGACGCCGGCATGCCGTGCCACACATGCACACACATAAATATATAAAGTAATATATGACTGATTGTCTGCCGAGGCCCAAGACGTCGGTCGTCGTAAACAGCTTATCAGCCGGGCAATGTGGTTACCCGTCGAAAGCGCTGGAACGGCAACCAGATCGGGAACCTGTCAATCACGTCATC	chr3L_8685575_8685823_+_dCP_twist_center245	twist	CAGACAGCTGC	245	Atf2	ATCACGTCATC	121	95	77	121	157	149	5.64343	5.28912	0.354309	3.6279	-1.66122	2.01553
chrX_1718421_1718669_+_dCP_twist_center57_to_GATAA	chrX_1718421_1718669	+	TGTGTCGCGCTGATAGCCGCCGACAGAGATGGCATCAACACCGGACTCCGTGAAGATAAGATGACACTCGAATTGGGTTAGGCGCAATATGCGAACCTTATTCCAAATACGAGGCATGCGTCAGCCCGCGCGCTTTTCTTTGTTCTGCGAATGCGAAGTCGACTGGGGCAGCGAAGGCACTGATATGGAATACCTGGTATCTCTCTGGGCAGCAGGGCGTATTGTATCCACGAATAGAGAACACTCAGT	chrX_1718421_1718669_+_dCP_twist_center57	twist	CCAGATGA	57	GATAA	AGATAAGA	270	264	250	281	260	312	5.18879	5.45579	-0.267007	3.67329	-1.78251	1.5155
chrX_1718421_1718669_+_dCP_twist_center57_to_AP1	chrX_1718421_1718669	+	TGTGTCGCGCTGATAGCCGCCGACAGAGATGGCATCAACACCGGACTCCGTGATGAGTCACTGACACTCGAATTGGGTTAGGCGCAATATGCGAACCTTATTCCAAATACGAGGCATGCGTCAGCCCGCGCGCTTTTCTTTGTTCTGCGAATGCGAAGTCGACTGGGGCAGCGAAGGCACTGATATGGAATACCTGGTATCTCTCTGGGCAGCAGGGCGTATTGTATCCACGAATAGAGAACACTCAGT	chrX_1718421_1718669_+_dCP_twist_center57	twist	ACCAGATGA	57	AP1	ATGAGTCAC	395	362	325	471	422	532	5.46512	5.45579	0.00932552	3.67329	-1.78251	1.79183
chrX_1718421_1718669_+_dCP_twist_center57_to_Trl	chrX_1718421_1718669	+	TGTGTCGCGCTGATAGCCGCCGACAGAGATGGCATCAACACCGGACTCCGTGAGAGAGAGATGACACTCGAATTGGGTTAGGCGCAATATGCGAACCTTATTCCAAATACGAGGCATGCGTCAGCCCGCGCGCTTTTCTTTGTTCTGCGAATGCGAAGTCGACTGGGGCAGCGAAGGCACTGATATGGAATACCTGGTATCTCTCTGGGCAGCAGGGCGTATTGTATCCACGAATAGAGAACACTCAGT	chrX_1718421_1718669_+_dCP_twist_center57	twist	CCAGATG	57	Trl	GAGAGAG	75	54	66	31	39	39	4.24122	5.45579	-1.21458	3.67329	-1.78251	0.567929
chrX_1718421_1718669_+_dCP_twist_center57_to_ETS	chrX_1718421_1718669	+	TGTGTCGCGCTGATAGCCGCCGACAGAGATGGCATCAACACCGGACTCCGTGACCGGAAGTTGACACTCGAATTGGGTTAGGCGCAATATGCGAACCTTATTCCAAATACGAGGCATGCGTCAGCCCGCGCGCTTTTCTTTGTTCTGCGAATGCGAAGTCGACTGGGGCAGCGAAGGCACTGATATGGAATACCTGGTATCTCTCTGGGCAGCAGGGCGTATTGTATCCACGAATAGAGAACACTCAGT	chrX_1718421_1718669_+_dCP_twist_center57	twist	ACCAGATGA	57	ETS	ACCGGAAGT	118	112	109	191	194	193	5.84727	5.45579	0.391479	3.67329	-1.78251	2.17399
chrX_1718421_1718669_+_dCP_twist_center57_to_SREBP	chrX_1718421_1718669	+	TGTGTCGCGCTGATAGCCGCCGACAGAGATGGCATCAACACCGGACTCCGTGATCACGCGACGACACTCGAATTGGGTTAGGCGCAATATGCGAACCTTATTCCAAATACGAGGCATGCGTCAGCCCGCGCGCTTTTCTTTGTTCTGCGAATGCGAAGTCGACTGGGGCAGCGAAGGCACTGATATGGAATACCTGGTATCTCTCTGGGCAGCAGGGCGTATTGTATCCACGAATAGAGAACACTCAGT	chrX_1718421_1718669_+_dCP_twist_center57	twist	ACCAGATGAT	57	SREBP	ATCACGCGAC	73	68	66	111	114	130	5.85083	5.45579	0.395038	3.67329	-1.78251	2.17754
chrX_1718421_1718669_+_dCP_twist_center57_to_Stat92E	chrX_1718421_1718669	+	TGTGTCGCGCTGATAGCCGCCGACAGAGATGGCATCAACACCGGACTCCGTTTTCCCGGAAAGACACTCGAATTGGGTTAGGCGCAATATGCGAACCTTATTCCAAATACGAGGCATGCGTCAGCCCGCGCGCTTTTCTTTGTTCTGCGAATGCGAAGTCGACTGGGGCAGCGAAGGCACTGATATGGAATACCTGGTATCTCTCTGGGCAGCAGGGCGTATTGTATCCACGAATAGAGAACACTCAGT	chrX_1718421_1718669_+_dCP_twist_center57	twist	GACCAGATGAT	57	Stat92E	TTTCCCGGAAA	210	144	148	64	48	60	3.5225	5.45579	-1.9333	3.67329	-1.78251	-0.15079
chrX_1718421_1718669_+_dCP_twist_center57_to_Atf2	chrX_1718421_1718669	+	TGTGTCGCGCTGATAGCCGCCGACAGAGATGGCATCAACACCGGACTCCGTATCACGTCATCGACACTCGAATTGGGTTAGGCGCAATATGCGAACCTTATTCCAAATACGAGGCATGCGTCAGCCCGCGCGCTTTTCTTTGTTCTGCGAATGCGAAGTCGACTGGGGCAGCGAAGGCACTGATATGGAATACCTGGTATCTCTCTGGGCAGCAGGGCGTATTGTATCCACGAATAGAGAACACTCAGT	chrX_1718421_1718669_+_dCP_twist_center57	twist	GACCAGATGAT	57	Atf2	ATCACGTCATC	162	126	112	192	136	172	5.38457	5.45579	-0.0712226	3.67329	-1.78251	1.71128
chr3R_22131380_22131628_+_dCP_twist_center111_to_GATAA	chr3R_22131380_22131628	+	TTCAATGTTTATAATAAAAGTGCGCGACTTGTCACACATTCAGGACGTAGCTCGTTTAGATTTTTTTCCATAGATTATGTTTTGATGGAACGCCAGCTGCAACAGCAAGATAAGACGCCGCCTGATGATGATTTCAGTGGCTGCCAGATGTTGTCGAGCCGCAAAAGAGAAAAATATCAAAGTAGGATACAAAAAGTTGCGAAAATAGAAAAAACATCAAGCCAACGATGGGAACTGCTGACGGCGGGA	chr3R_22131380_22131628_+_dCP_twist_center111	twist	CCATCTGC	111	GATAA	AGATAAGA	40	35	30	261	227	295	7.96508	4.87713	3.08795	3.56569	-1.31143	4.39939
chr3R_22131380_22131628_+_dCP_twist_center111_to_AP1	chr3R_22131380_22131628	+	TTCAATGTTTATAATAAAAGTGCGCGACTTGTCACACATTCAGGACGTAGCTCGTTTAGATTTTTTTCCATAGATTATGTTTTGATGGAACGCCAGCTGCAACAGCATGAGTCACCGCCGCCTGATGATGATTTCAGTGGCTGCCAGATGTTGTCGAGCCGCAAAAGAGAAAAATATCAAAGTAGGATACAAAAAGTTGCGAAAATAGAAAAAACATCAAGCCAACGATGGGAACTGCTGACGGCGGGA	chr3R_22131380_22131628_+_dCP_twist_center111	twist	ACCATCTGC	111	AP1	ATGAGTCAC	35	26	19	87	66	82	6.62002	4.87713	1.74289	3.56569	-1.31143	3.05432
chr3R_22131380_22131628_+_dCP_twist_center111_to_Trl	chr3R_22131380_22131628	+	TTCAATGTTTATAATAAAAGTGCGCGACTTGTCACACATTCAGGACGTAGCTCGTTTAGATTTTTTTCCATAGATTATGTTTTGATGGAACGCCAGCTGCAACAGCAGAGAGAGCCGCCGCCTGATGATGATTTCAGTGGCTGCCAGATGTTGTCGAGCCGCAAAAGAGAAAAATATCAAAGTAGGATACAAAAAGTTGCGAAAATAGAAAAAACATCAAGCCAACGATGGGAACTGCTGACGGCGGGA	chr3R_22131380_22131628_+_dCP_twist_center111	twist	CCATCTG	111	Trl	GAGAGAG	25	25	26	12	16	15	4.24653	4.87713	-0.630595	3.56569	-1.31143	0.68084
chr3R_22131380_22131628_+_dCP_twist_center111_to_ETS	chr3R_22131380_22131628	+	TTCAATGTTTATAATAAAAGTGCGCGACTTGTCACACATTCAGGACGTAGCTCGTTTAGATTTTTTTCCATAGATTATGTTTTGATGGAACGCCAGCTGCAACAGCACCGGAAGTCGCCGCCTGATGATGATTTCAGTGGCTGCCAGATGTTGTCGAGCCGCAAAAGAGAAAAATATCAAAGTAGGATACAAAAAGTTGCGAAAATAGAAAAAACATCAAGCCAACGATGGGAACTGCTGACGGCGGGA	chr3R_22131380_22131628_+_dCP_twist_center111	twist	ACCATCTGC	111	ETS	ACCGGAAGT	52	51	41	228	185	227	7.21509	4.87713	2.33796	3.56569	-1.31143	3.64939
chr3R_22131380_22131628_+_dCP_twist_center111_to_SREBP	chr3R_22131380_22131628	+	TTCAATGTTTATAATAAAAGTGCGCGACTTGTCACACATTCAGGACGTAGCTCGTTTAGATTTTTTTCCATAGATTATGTTTTGATGGAACGCCAGCTGCAACAGCATCACGCGACGCCGCCTGATGATGATTTCAGTGGCTGCCAGATGTTGTCGAGCCGCAAAAGAGAAAAATATCAAAGTAGGATACAAAAAGTTGCGAAAATAGAAAAAACATCAAGCCAACGATGGGAACTGCTGACGGCGGGA	chr3R_22131380_22131628_+_dCP_twist_center111	twist	ACCATCTGCC	111	SREBP	ATCACGCGAC	57	48	49	335	314	420	7.86389	4.87713	2.98677	3.56569	-1.31143	4.2982
chr3R_22131380_22131628_+_dCP_twist_center111_to_Stat92E	chr3R_22131380_22131628	+	TTCAATGTTTATAATAAAAGTGCGCGACTTGTCACACATTCAGGACGTAGCTCGTTTAGATTTTTTTCCATAGATTATGTTTTGATGGAACGCCAGCTGCAACAGTTTCCCGGAAAGCCGCCTGATGATGATTTCAGTGGCTGCCAGATGTTGTCGAGCCGCAAAAGAGAAAAATATCAAAGTAGGATACAAAAAGTTGCGAAAATAGAAAAAACATCAAGCCAACGATGGGAACTGCTGACGGCGGGA	chr3R_22131380_22131628_+_dCP_twist_center111	twist	CACCATCTGCC	111	Stat92E	TTTCCCGGAAA	61	64	66	27	30	33	3.97927	4.87713	-0.897853	3.56569	-1.31143	0.413581
chr3R_22131380_22131628_+_dCP_twist_center111_to_Atf2	chr3R_22131380_22131628	+	TTCAATGTTTATAATAAAAGTGCGCGACTTGTCACACATTCAGGACGTAGCTCGTTTAGATTTTTTTCCATAGATTATGTTTTGATGGAACGCCAGCTGCAACAGATCACGTCATCGCCGCCTGATGATGATTTCAGTGGCTGCCAGATGTTGTCGAGCCGCAAAAGAGAAAAATATCAAAGTAGGATACAAAAAGTTGCGAAAATAGAAAAAACATCAAGCCAACGATGGGAACTGCTGACGGCGGGA	chr3R_22131380_22131628_+_dCP_twist_center111	twist	CACCATCTGCC	111	Atf2	ATCACGTCATC	43	25	26	113	96	144	6.97751	4.87713	2.10039	3.56569	-1.31143	3.41182
chrX_1718389_1718637_+_hkCP_twist_center160_to_GATAA	chrX_1718389_1718637	-	CCCTGCTGCCCAGAGAGATACCAGGTATTCCATATCAGTGCCTTCGCTGCCCCAGTCGACTTCGCATTCGCAGAACAAAGAAAAGCGCGCGGGCTGACGCATGCCTCGTATTTGGAATAAGGTTCGCATATTGCGCCTAACCCAATTCGAGTGTCAAGATAAGATCACGGAGTCCGGTGTTGATGCCATCTCTGTCGGCGGCTATCAGCGCGACACAGAGCTGTGAAGCTTTCAATCAGCGGATTGCTT	chrX_1718389_1718637_+_hkCP_twist_center160	twist	TCATCTGG	160	GATAA	AGATAAGA	343	281	291	88	95	94	3.35632	4.59496	-1.23864	3.18464	-1.41032	0.171686
chrX_1718389_1718637_+_hkCP_twist_center160_to_AP1	chrX_1718389_1718637	-	CCCTGCTGCCCAGAGAGATACCAGGTATTCCATATCAGTGCCTTCGCTGCCCCAGTCGACTTCGCATTCGCAGAACAAAGAAAAGCGCGCGGGCTGACGCATGCCTCGTATTTGGAATAAGGTTCGCATATTGCGCCTAACCCAATTCGAGTGTCATGAGTCACTCACGGAGTCCGGTGTTGATGCCATCTCTGTCGGCGGCTATCAGCGCGACACAGAGCTGTGAAGCTTTCAATCAGCGGATTGCTT	chrX_1718389_1718637_+_hkCP_twist_center160	twist	ATCATCTGG	160	AP1	ATGAGTCAC	157	160	151	85	99	116	4.43179	4.59496	-0.163169	3.18464	-1.41032	1.24716
chrX_1718389_1718637_+_hkCP_twist_center160_to_Trl	chrX_1718389_1718637	-	CCCTGCTGCCCAGAGAGATACCAGGTATTCCATATCAGTGCCTTCGCTGCCCCAGTCGACTTCGCATTCGCAGAACAAAGAAAAGCGCGCGGGCTGACGCATGCCTCGTATTTGGAATAAGGTTCGCATATTGCGCCTAACCCAATTCGAGTGTCAGAGAGAGGTCACGGAGTCCGGTGTTGATGCCATCTCTGTCGGCGGCTATCAGCGCGACACAGAGCTGTGAAGCTTTCAATCAGCGGATTGCTT	chrX_1718389_1718637_+_hkCP_twist_center160	twist	TCATCTG	160	Trl	GAGAGAG	382	290	316	88	73	84	3.05648	4.59496	-1.53849	3.18464	-1.41032	-0.128161
chrX_1718389_1718637_+_hkCP_twist_center160_to_ETS	chrX_1718389_1718637	-	CCCTGCTGCCCAGAGAGATACCAGGTATTCCATATCAGTGCCTTCGCTGCCCCAGTCGACTTCGCATTCGCAGAACAAAGAAAAGCGCGCGGGCTGACGCATGCCTCGTATTTGGAATAAGGTTCGCATATTGCGCCTAACCCAATTCGAGTGTCACCGGAAGTTCACGGAGTCCGGTGTTGATGCCATCTCTGTCGGCGGCTATCAGCGCGACACAGAGCTGTGAAGCTTTCAATCAGCGGATTGCTT	chrX_1718389_1718637_+_hkCP_twist_center160	twist	ATCATCTGG	160	ETS	ACCGGAAGT	358	339	301	204	191	255	4.44737	4.59496	-0.147591	3.18464	-1.41032	1.26273
chrX_1718389_1718637_+_hkCP_twist_center160_to_SREBP	chrX_1718389_1718637	-	CCCTGCTGCCCAGAGAGATACCAGGTATTCCATATCAGTGCCTTCGCTGCCCCAGTCGACTTCGCATTCGCAGAACAAAGAAAAGCGCGCGGGCTGACGCATGCCTCGTATTTGGAATAAGGTTCGCATATTGCGCCTAACCCAATTCGAGTGTCATCACGCGACCACGGAGTCCGGTGTTGATGCCATCTCTGTCGGCGGCTATCAGCGCGACACAGAGCTGTGAAGCTTTCAATCAGCGGATTGCTT	chrX_1718389_1718637_+_hkCP_twist_center160	twist	ATCATCTGGT	160	SREBP	ATCACGCGAC	408	390	358	206	218	268	4.3328	4.59496	-0.262161	3.18464	-1.41032	1.14816
chrX_1718389_1718637_+_hkCP_twist_center160_to_Stat92E	chrX_1718389_1718637	-	CCCTGCTGCCCAGAGAGATACCAGGTATTCCATATCAGTGCCTTCGCTGCCCCAGTCGACTTCGCATTCGCAGAACAAAGAAAAGCGCGCGGGCTGACGCATGCCTCGTATTTGGAATAAGGTTCGCATATTGCGCCTAACCCAATTCGAGTGTTTTCCCGGAAACACGGAGTCCGGTGTTGATGCCATCTCTGTCGGCGGCTATCAGCGCGACACAGAGCTGTGAAGCTTTCAATCAGCGGATTGCTT	chrX_1718389_1718637_+_hkCP_twist_center160	twist	CATCATCTGGT	160	Stat92E	TTTCCCGGAAA	535	427	451	99	82	99	2.73075	4.59496	-1.86421	3.18464	-1.41032	-0.453888
chrX_1718389_1718637_+_hkCP_twist_center160_to_Atf2	chrX_1718389_1718637	-	CCCTGCTGCCCAGAGAGATACCAGGTATTCCATATCAGTGCCTTCGCTGCCCCAGTCGACTTCGCATTCGCAGAACAAAGAAAAGCGCGCGGGCTGACGCATGCCTCGTATTTGGAATAAGGTTCGCATATTGCGCCTAACCCAATTCGAGTGTATCACGTCATCCACGGAGTCCGGTGTTGATGCCATCTCTGTCGGCGGCTATCAGCGCGACACAGAGCTGTGAAGCTTTCAATCAGCGGATTGCTT	chrX_1718389_1718637_+_hkCP_twist_center160	twist	CATCATCTGGT	160	Atf2	ATCACGTCATC	435	416	385	205	219	273	4.24647	4.59496	-0.348493	3.18464	-1.41032	1.06183
chr3R_13470150_13470398_+_hkCP_twist_center205_to_GATAA	chr3R_13470150_13470398	+	TGCAGGGGGCTTATGCCATTAGGCTGATGGATGCGATGGATGCTCTACAAATTCAACAAAAATACTTGATCAATCTGTCATGATCTAATCATGTTTGCAATATAATACATAAGATTCCGATTTAGGTACACGTACAGAGGAAATACTGAATGATTCAATGCAAAGTTGTGTGTGTTTGATAAGCATAAAGAATGATGACACAGATAAGATTCGGAAGTATTTAAAATGTTGGTCAGTTCAGAAATTGTA	chr3R_13470150_13470398_+_hkCP_twist_center205	twist	ACACATGT	205	GATAA	AGATAAGA	16	13	14	0	0	0	1.21916	5.18642	-3.96726	3.79588	-1.39054	-2.57672
chr3R_13470150_13470398_+_hkCP_twist_center205_to_AP1	chr3R_13470150_13470398	+	TGCAGGGGGCTTATGCCATTAGGCTGATGGATGCGATGGATGCTCTACAAATTCAACAAAAATACTTGATCAATCTGTCATGATCTAATCATGTTTGCAATATAATACATAAGATTCCGATTTAGGTACACGTACAGAGGAAATACTGAATGATTCAATGCAAAGTTGTGTGTGTTTGATAAGCATAAAGAATGATGACAATGAGTCACTTCGGAAGTATTTAAAATGTTGGTCAGTTCAGAAATTGTA	chr3R_13470150_13470398_+_hkCP_twist_center205	twist	CACACATGT	205	AP1	ATGAGTCAC	22	21	31	30	36	29	5.4367	5.18642	0.25028	3.79588	-1.39054	1.64082
chr3R_13470150_13470398_+_hkCP_twist_center205_to_Trl	chr3R_13470150_13470398	+	TGCAGGGGGCTTATGCCATTAGGCTGATGGATGCGATGGATGCTCTACAAATTCAACAAAAATACTTGATCAATCTGTCATGATCTAATCATGTTTGCAATATAATACATAAGATTCCGATTTAGGTACACGTACAGAGGAAATACTGAATGATTCAATGCAAAGTTGTGTGTGTTTGATAAGCATAAAGAATGATGACACGAGAGAGTTTCGGAAGTATTTAAAATGTTGGTCAGTTCAGAAATTGTA	chr3R_13470150_13470398_+_hkCP_twist_center205	twist	ACACATG	205	Trl	GAGAGAG	63	57	45	22	5	15	3.06339	5.18642	-2.12303	3.79588	-1.39054	-0.732491
chr3R_13470150_13470398_+_hkCP_twist_center205_to_ETS	chr3R_13470150_13470398	+	TGCAGGGGGCTTATGCCATTAGGCTGATGGATGCGATGGATGCTCTACAAATTCAACAAAAATACTTGATCAATCTGTCATGATCTAATCATGTTTGCAATATAATACATAAGATTCCGATTTAGGTACACGTACAGAGGAAATACTGAATGATTCAATGCAAAGTTGTGTGTGTTTGATAAGCATAAAGAATGATGACAACCGGAAGTTTCGGAAGTATTTAAAATGTTGGTCAGTTCAGAAATTGTA	chr3R_13470150_13470398_+_hkCP_twist_center205	twist	CACACATGT	205	ETS	ACCGGAAGT	63	64	46	31	40	49	4.54692	5.18642	-0.639506	3.79588	-1.39054	0.751036
chr3R_13470150_13470398_+_hkCP_twist_center205_to_SREBP	chr3R_13470150_13470398	+	TGCAGGGGGCTTATGCCATTAGGCTGATGGATGCGATGGATGCTCTACAAATTCAACAAAAATACTTGATCAATCTGTCATGATCTAATCATGTTTGCAATATAATACATAAGATTCCGATTTAGGTACACGTACAGAGGAAATACTGAATGATTCAATGCAAAGTTGTGTGTGTTTGATAAGCATAAAGAATGATGACAATCACGCGACTCGGAAGTATTTAAAATGTTGGTCAGTTCAGAAATTGTA	chr3R_13470150_13470398_+_hkCP_twist_center205	twist	CACACATGTT	205	SREBP	ATCACGCGAC	36	36	39	22	18	32	4.42831	5.18642	-0.758117	3.79588	-1.39054	0.632424
chr3R_13470150_13470398_+_hkCP_twist_center205_to_Stat92E	chr3R_13470150_13470398	+	TGCAGGGGGCTTATGCCATTAGGCTGATGGATGCGATGGATGCTCTACAAATTCAACAAAAATACTTGATCAATCTGTCATGATCTAATCATGTTTGCAATATAATACATAAGATTCCGATTTAGGTACACGTACAGAGGAAATACTGAATGATTCAATGCAAAGTTGTGTGTGTTTGATAAGCATAAAGAATGATGACTTTCCCGGAAATCGGAAGTATTTAAAATGTTGGTCAGTTCAGAAATTGTA	chr3R_13470150_13470398_+_hkCP_twist_center205	twist	ACACACATGTT	205	Stat92E	TTTCCCGGAAA	28	21	27	6	8	7	3.21169	5.18642	-1.97474	3.79588	-1.39054	-0.584196
chr3R_13470150_13470398_+_hkCP_twist_center205_to_Atf2	chr3R_13470150_13470398	+	TGCAGGGGGCTTATGCCATTAGGCTGATGGATGCGATGGATGCTCTACAAATTCAACAAAAATACTTGATCAATCTGTCATGATCTAATCATGTTTGCAATATAATACATAAGATTCCGATTTAGGTACACGTACAGAGGAAATACTGAATGATTCAATGCAAAGTTGTGTGTGTTTGATAAGCATAAAGAATGATGACATCACGTCATCTCGGAAGTATTTAAAATGTTGGTCAGTTCAGAAATTGTA	chr3R_13470150_13470398_+_hkCP_twist_center205	twist	ACACACATGTT	205	Atf2	ATCACGTCATC	65	58	50	58	63	93	5.37566	5.18642	0.189235	3.79588	-1.39054	1.57978
chr3R_15734926_15735174_+_dCP_twist_center148_to_GATAA	chr3R_15734926_15735174	+	GTTTTCTTTCATACTGGCTCTGTCTTTATCTCACACCAGTTTCTATTGTATTGTTTGTTTGCCGTGCGTTTCGCTTTTGTCGTTTACGTTTTTATTATTCGAATCCAATACTCGACGCTGCTGCCTTATCGCCGAGTAGTGGGCAGATAAGAAGTGGGATGTGGCGCGCTGGAGGAGATGAGATGGCATGAACGGCTCTTTGGTGTTCCAATTTCTTGACGAACCCGATTGGTTCTGTCCCCTGGAGTC	chr3R_15734926_15735174_+_dCP_twist_center148	twist	ACATCTGG	148	GATAA	AGATAAGA	221	224	220	781	737	847	6.89973	6.14838	0.751342	4.71621	-1.43217	2.18351
chr3R_15734926_15735174_+_dCP_twist_center148_to_AP1	chr3R_15734926_15735174	+	GTTTTCTTTCATACTGGCTCTGTCTTTATCTCACACCAGTTTCTATTGTATTGTTTGTTTGCCGTGCGTTTCGCTTTTGTCGTTTACGTTTTTATTATTCGAATCCAATACTCGACGCTGCTGCCTTATCGCCGAGTAGTGGGATGAGTCACAGTGGGATGTGGCGCGCTGGAGGAGATGAGATGGCATGAACGGCTCTTTGGTGTTCCAATTTCTTGACGAACCCGATTGGTTCTGTCCCCTGGAGTC	chr3R_15734926_15735174_+_dCP_twist_center148	twist	CACATCTGG	148	AP1	ATGAGTCAC	449	384	397	2084	2035	2462	7.4946	6.14838	1.34622	4.71621	-1.43217	2.77839
chr3R_15734926_15735174_+_dCP_twist_center148_to_Trl	chr3R_15734926_15735174	+	GTTTTCTTTCATACTGGCTCTGTCTTTATCTCACACCAGTTTCTATTGTATTGTTTGTTTGCCGTGCGTTTCGCTTTTGTCGTTTACGTTTTTATTATTCGAATCCAATACTCGACGCTGCTGCCTTATCGCCGAGTAGTGGGCGAGAGAGGAGTGGGATGTGGCGCGCTGGAGGAGATGAGATGGCATGAACGGCTCTTTGGTGTTCCAATTTCTTGACGAACCCGATTGGTTCTGTCCCCTGGAGTC	chr3R_15734926_15735174_+_dCP_twist_center148	twist	ACATCTG	148	Trl	GAGAGAG	400	374	349	632	488	599	5.67475	6.14838	-0.473637	4.71621	-1.43217	0.958533
chr3R_15734926_15735174_+_dCP_twist_center148_to_ETS	chr3R_15734926_15735174	+	GTTTTCTTTCATACTGGCTCTGTCTTTATCTCACACCAGTTTCTATTGTATTGTTTGTTTGCCGTGCGTTTCGCTTTTGTCGTTTACGTTTTTATTATTCGAATCCAATACTCGACGCTGCTGCCTTATCGCCGAGTAGTGGGACCGGAAGTAGTGGGATGTGGCGCGCTGGAGGAGATGAGATGGCATGAACGGCTCTTTGGTGTTCCAATTTCTTGACGAACCCGATTGGTTCTGTCCCCTGGAGTC	chr3R_15734926_15735174_+_dCP_twist_center148	twist	CACATCTGG	148	ETS	ACCGGAAGT	273	224	269	1423	1318	1602	7.57441	6.14838	1.42602	4.71621	-1.43217	2.85819
chr3R_15734926_15735174_+_dCP_twist_center148_to_SREBP	chr3R_15734926_15735174	+	GTTTTCTTTCATACTGGCTCTGTCTTTATCTCACACCAGTTTCTATTGTATTGTTTGTTTGCCGTGCGTTTCGCTTTTGTCGTTTACGTTTTTATTATTCGAATCCAATACTCGACGCTGCTGCCTTATCGCCGAGTAGTGGGATCACGCGACGTGGGATGTGGCGCGCTGGAGGAGATGAGATGGCATGAACGGCTCTTTGGTGTTCCAATTTCTTGACGAACCCGATTGGTTCTGTCCCCTGGAGTC	chr3R_15734926_15735174_+_dCP_twist_center148	twist	CACATCTGGA	148	SREBP	ATCACGCGAC	297	258	266	1280	1220	1499	7.3566	6.14838	1.20821	4.71621	-1.43217	2.64038
chr3R_15734926_15735174_+_dCP_twist_center148_to_Stat92E	chr3R_15734926_15735174	+	GTTTTCTTTCATACTGGCTCTGTCTTTATCTCACACCAGTTTCTATTGTATTGTTTGTTTGCCGTGCGTTTCGCTTTTGTCGTTTACGTTTTTATTATTCGAATCCAATACTCGACGCTGCTGCCTTATCGCCGAGTAGTGGTTTCCCGGAAAGTGGGATGTGGCGCGCTGGAGGAGATGAGATGGCATGAACGGCTCTTTGGTGTTCCAATTTCTTGACGAACCCGATTGGTTCTGTCCCCTGGAGTC	chr3R_15734926_15735174_+_dCP_twist_center148	twist	GCACATCTGGA	148	Stat92E	TTTCCCGGAAA	214	184	163	497	497	522	6.5164	6.14838	0.368014	4.71621	-1.43217	1.80018
chr3R_15734926_15735174_+_dCP_twist_center148_to_Atf2	chr3R_15734926_15735174	+	GTTTTCTTTCATACTGGCTCTGTCTTTATCTCACACCAGTTTCTATTGTATTGTTTGTTTGCCGTGCGTTTCGCTTTTGTCGTTTACGTTTTTATTATTCGAATCCAATACTCGACGCTGCTGCCTTATCGCCGAGTAGTGGATCACGTCATCGTGGGATGTGGCGCGCTGGAGGAGATGAGATGGCATGAACGGCTCTTTGGTGTTCCAATTTCTTGACGAACCCGATTGGTTCTGTCCCCTGGAGTC	chr3R_15734926_15735174_+_dCP_twist_center148	twist	GCACATCTGGA	148	Atf2	ATCACGTCATC	346	338	355	1256	1118	1397	6.92361	6.14838	0.775228	4.71621	-1.43217	2.2074
chr3R_16667777_16668025_+_dCP_twist_center129_to_GATAA	chr3R_16667777_16668025	-	TTCTCCATTAACATAAATCGGTTATATTTATTGCACTAAACTATAGTTATCCAGTAATATCCGGTAAATTTATTCTAGACCCGGCGTTATCCATACCATTTCCGCGACTTATCACAAATCGGACCAGATAAGACCGCTCCGCTCGGTACTTAACACTCAACTGACGATAGCTTTCAGAATTCCACAATGCTTGGGGTTCTCTGTTACTACTCAACCAACCACTGAGTGCTCCAAAGTTTCTGGGAACTG	chr3R_16667777_16668025_+_dCP_twist_center129	twist	CCATATGT	129	GATAA	AGATAAGA	108	78	83	39	34	40	3.81737	5.23567	-1.4183	3.79288	-1.44279	0.0244922
chr3R_16667777_16668025_+_dCP_twist_center129_to_AP1	chr3R_16667777_16668025	-	TTCTCCATTAACATAAATCGGTTATATTTATTGCACTAAACTATAGTTATCCAGTAATATCCGGTAAATTTATTCTAGACCCGGCGTTATCCATACCATTTCCGCGACTTATCACAAATCGGACATGAGTCACCCGCTCCGCTCGGTACTTAACACTCAACTGACGATAGCTTTCAGAATTCCACAATGCTTGGGGTTCTCTGTTACTACTCAACCAACCACTGAGTGCTCCAAAGTTTCTGGGAACTG	chr3R_16667777_16668025_+_dCP_twist_center129	twist	CCCATATGT	129	AP1	ATGAGTCAC	141	123	130	899	891	1024	7.91251	5.23567	2.67684	3.79288	-1.44279	4.11963
chr3R_16667777_16668025_+_dCP_twist_center129_to_Trl	chr3R_16667777_16668025	-	TTCTCCATTAACATAAATCGGTTATATTTATTGCACTAAACTATAGTTATCCAGTAATATCCGGTAAATTTATTCTAGACCCGGCGTTATCCATACCATTTCCGCGACTTATCACAAATCGGACCGAGAGAGTCCGCTCCGCTCGGTACTTAACACTCAACTGACGATAGCTTTCAGAATTCCACAATGCTTGGGGTTCTCTGTTACTACTCAACCAACCACTGAGTGCTCCAAAGTTTCTGGGAACTG	chr3R_16667777_16668025_+_dCP_twist_center129	twist	CCATATG	129	Trl	GAGAGAG	157	150	149	142	90	122	4.68419	5.23567	-0.55148	3.79288	-1.44279	0.891314
chr3R_16667777_16668025_+_dCP_twist_center129_to_ETS	chr3R_16667777_16668025	-	TTCTCCATTAACATAAATCGGTTATATTTATTGCACTAAACTATAGTTATCCAGTAATATCCGGTAAATTTATTCTAGACCCGGCGTTATCCATACCATTTCCGCGACTTATCACAAATCGGACACCGGAAGTCCGCTCCGCTCGGTACTTAACACTCAACTGACGATAGCTTTCAGAATTCCACAATGCTTGGGGTTCTCTGTTACTACTCAACCAACCACTGAGTGCTCCAAAGTTTCTGGGAACTG	chr3R_16667777_16668025_+_dCP_twist_center129	twist	CCCATATGT	129	ETS	ACCGGAAGT	118	109	92	269	242	327	6.45935	5.23567	1.22368	3.79288	-1.44279	2.66647
chr3R_16667777_16668025_+_dCP_twist_center129_to_SREBP	chr3R_16667777_16668025	-	TTCTCCATTAACATAAATCGGTTATATTTATTGCACTAAACTATAGTTATCCAGTAATATCCGGTAAATTTATTCTAGACCCGGCGTTATCCATACCATTTCCGCGACTTATCACAAATCGGACATCACGCGACCGCTCCGCTCGGTACTTAACACTCAACTGACGATAGCTTTCAGAATTCCACAATGCTTGGGGTTCTCTGTTACTACTCAACCAACCACTGAGTGCTCCAAAGTTTCTGGGAACTG	chr3R_16667777_16668025_+_dCP_twist_center129	twist	CCCATATGTC	129	SREBP	ATCACGCGAC	90	79	74	409	332	445	7.34925	5.23567	2.11358	3.79288	-1.44279	3.55637
chr3R_16667777_16668025_+_dCP_twist_center129_to_Stat92E	chr3R_16667777_16668025	-	TTCTCCATTAACATAAATCGGTTATATTTATTGCACTAAACTATAGTTATCCAGTAATATCCGGTAAATTTATTCTAGACCCGGCGTTATCCATACCATTTCCGCGACTTATCACAAATCGGATTTCCCGGAAACGCTCCGCTCGGTACTTAACACTCAACTGACGATAGCTTTCAGAATTCCACAATGCTTGGGGTTCTCTGTTACTACTCAACCAACCACTGAGTGCTCCAAAGTTTCTGGGAACTG	chr3R_16667777_16668025_+_dCP_twist_center129	twist	CCCCATATGTC	129	Stat92E	TTTCCCGGAAA	266	206	231	319	272	289	5.39682	5.23567	0.161144	3.79288	-1.44279	1.60394
chr3R_16667777_16668025_+_dCP_twist_center129_to_Atf2	chr3R_16667777_16668025	-	TTCTCCATTAACATAAATCGGTTATATTTATTGCACTAAACTATAGTTATCCAGTAATATCCGGTAAATTTATTCTAGACCCGGCGTTATCCATACCATTTCCGCGACTTATCACAAATCGGAATCACGTCATCCGCTCCGCTCGGTACTTAACACTCAACTGACGATAGCTTTCAGAATTCCACAATGCTTGGGGTTCTCTGTTACTACTCAACCAACCACTGAGTGCTCCAAAGTTTCTGGGAACTG	chr3R_16667777_16668025_+_dCP_twist_center129	twist	CCCCATATGTC	129	Atf2	ATCACGTCATC	214	168	212	1015	888	1011	7.36557	5.23567	2.12989	3.79288	-1.44279	3.57269
chr3L_13911200_13911448_+_dCP_twist_center69_to_GATAA	chr3L_13911200_13911448	+	TTCATATCCGAATAAAACTTTTATTTAACGTGTATATGTACATATGTATCTGTCTCTACTGCAGAAGATAAGACCCGCTCTTTCGGCTATTATCAAACCACATCCGTTGGGCAGCAGCAGAGATGATGTGCAAACAATACAAAAACATATCAACCTAAGCTAAAGTTTGAGCCACTGAGCATAGCTCCCCACGTAAATTATTTTTTTTATGCATTCCCCCATCATTCGCCAGTGGGTAAAGGAAGTGGG	chr3L_13911200_13911448_+_dCP_twist_center69	twist	GCAGCTGT	69	GATAA	AGATAAGA	69	42	48	328	290	353	7.68655	5.93904	1.74751	4.22881	-1.71023	3.45774
chr3L_13911200_13911448_+_dCP_twist_center69_to_AP1	chr3L_13911200_13911448	+	TTCATATCCGAATAAAACTTTTATTTAACGTGTATATGTACATATGTATCTGTCTCTACTGCAGATGAGTCACCCCGCTCTTTCGGCTATTATCAAACCACATCCGTTGGGCAGCAGCAGAGATGATGTGCAAACAATACAAAAACATATCAACCTAAGCTAAAGTTTGAGCCACTGAGCATAGCTCCCCACGTAAATTATTTTTTTTATGCATTCCCCCATCATTCGCCAGTGGGTAAAGGAAGTGGG	chr3L_13911200_13911448_+_dCP_twist_center69	twist	AGCAGCTGT	69	AP1	ATGAGTCAC	54	41	51	288	284	292	7.64496	5.93904	1.70592	4.22881	-1.71023	3.41616
chr3L_13911200_13911448_+_dCP_twist_center69_to_Trl	chr3L_13911200_13911448	+	TTCATATCCGAATAAAACTTTTATTTAACGTGTATATGTACATATGTATCTGTCTCTACTGCAGAGAGAGAGTCCCGCTCTTTCGGCTATTATCAAACCACATCCGTTGGGCAGCAGCAGAGATGATGTGCAAACAATACAAAAACATATCAACCTAAGCTAAAGTTTGAGCCACTGAGCATAGCTCCCCACGTAAATTATTTTTTTTATGCATTCCCCCATCATTCGCCAGTGGGTAAAGGAAGTGGG	chr3L_13911200_13911448_+_dCP_twist_center69	twist	GCAGCTG	69	Trl	GAGAGAG	38	31	26	24	27	26	4.77192	5.93904	-1.16712	4.22881	-1.71023	0.543116
chr3L_13911200_13911448_+_dCP_twist_center69_to_ETS	chr3L_13911200_13911448	+	TTCATATCCGAATAAAACTTTTATTTAACGTGTATATGTACATATGTATCTGTCTCTACTGCAGACCGGAAGTCCCGCTCTTTCGGCTATTATCAAACCACATCCGTTGGGCAGCAGCAGAGATGATGTGCAAACAATACAAAAACATATCAACCTAAGCTAAAGTTTGAGCCACTGAGCATAGCTCCCCACGTAAATTATTTTTTTTATGCATTCCCCCATCATTCGCCAGTGGGTAAAGGAAGTGGG	chr3L_13911200_13911448_+_dCP_twist_center69	twist	AGCAGCTGT	69	ETS	ACCGGAAGT	153	126	124	308	237	266	6.0748	5.93904	0.135762	4.22881	-1.71023	1.846
chr3L_13911200_13911448_+_dCP_twist_center69_to_SREBP	chr3L_13911200_13911448	+	TTCATATCCGAATAAAACTTTTATTTAACGTGTATATGTACATATGTATCTGTCTCTACTGCAGATCACGCGACCCGCTCTTTCGGCTATTATCAAACCACATCCGTTGGGCAGCAGCAGAGATGATGTGCAAACAATACAAAAACATATCAACCTAAGCTAAAGTTTGAGCCACTGAGCATAGCTCCCCACGTAAATTATTTTTTTTATGCATTCCCCCATCATTCGCCAGTGGGTAAAGGAAGTGGG	chr3L_13911200_13911448_+_dCP_twist_center69	twist	AGCAGCTGTC	69	SREBP	ATCACGCGAC	65	59	47	651	624	816	8.68385	5.93904	2.74481	4.22881	-1.71023	4.45504
chr3L_13911200_13911448_+_dCP_twist_center69_to_Stat92E	chr3L_13911200_13911448	+	TTCATATCCGAATAAAACTTTTATTTAACGTGTATATGTACATATGTATCTGTCTCTACTGCATTTCCCGGAAACCGCTCTTTCGGCTATTATCAAACCACATCCGTTGGGCAGCAGCAGAGATGATGTGCAAACAATACAAAAACATATCAACCTAAGCTAAAGTTTGAGCCACTGAGCATAGCTCCCCACGTAAATTATTTTTTTTATGCATTCCCCCATCATTCGCCAGTGGGTAAAGGAAGTGGG	chr3L_13911200_13911448_+_dCP_twist_center69	twist	GAGCAGCTGTC	69	Stat92E	TTTCCCGGAAA	147	125	109	142	77	106	4.81888	5.93904	-1.12016	4.22881	-1.71023	0.590076
chr3L_13911200_13911448_+_dCP_twist_center69_to_Atf2	chr3L_13911200_13911448	+	TTCATATCCGAATAAAACTTTTATTTAACGTGTATATGTACATATGTATCTGTCTCTACTGCAATCACGTCATCCCGCTCTTTCGGCTATTATCAAACCACATCCGTTGGGCAGCAGCAGAGATGATGTGCAAACAATACAAAAACATATCAACCTAAGCTAAAGTTTGAGCCACTGAGCATAGCTCCCCACGTAAATTATTTTTTTTATGCATTCCCCCATCATTCGCCAGTGGGTAAAGGAAGTGGG	chr3L_13911200_13911448_+_dCP_twist_center69	twist	GAGCAGCTGTC	69	Atf2	ATCACGTCATC	49	25	56	113	100	112	6.3953	5.93904	0.45626	4.22881	-1.71023	2.16649
chr3L_1413264_1413512_+_dCP_twist_center230_to_GATAA	chr3L_1413264_1413512	+	GGTCACAATTAGTGACCCCGCTTAAATCAGCGGAATCCGCTTTCCTCCGGTTCGCTGATTGCCAGCTTCCGGATGTGTCATCCCGCGATGAGACGGAATGGAGGAGTCTTCGCCAGCGCTGATCAGCGCGACAATTGCCCTTCCCTTGATTGCCATCAATTGCGCAAAACAGTCGCCGTGAATTGGGACTCGGATAGTACCGGGCAGTGATAAGCACAGCGAGTGGAGATAAGAGTCAGTGATGGATTA	chr3L_1413264_1413512_+_dCP_twist_center230	twist	ACAAGTGT	230	GATAA	AGATAAGA	122	141	115	212	179	235	5.78507	4.23796	1.5471	2.9075	-1.33047	2.87757
chr3L_1413264_1413512_+_dCP_twist_center230_to_AP1	chr3L_1413264_1413512	+	GGTCACAATTAGTGACCCCGCTTAAATCAGCGGAATCCGCTTTCCTCCGGTTCGCTGATTGCCAGCTTCCGGATGTGTCATCCCGCGATGAGACGGAATGGAGGAGTCTTCGCCAGCGCTGATCAGCGCGACAATTGCCCTTCCCTTGATTGCCATCAATTGCGCAAAACAGTCGCCGTGAATTGGGACTCGGATAGTACCGGGCAGTGATAAGCACAGCGAGTGATGAGTCACGTCAGTGATGGATTA	chr3L_1413264_1413512_+_dCP_twist_center230	twist	GACAAGTGT	230	AP1	ATGAGTCAC	140	110	138	453	451	537	6.96829	4.23796	2.73032	2.9075	-1.33047	4.06079
chr3L_1413264_1413512_+_dCP_twist_center230_to_Trl	chr3L_1413264_1413512	+	GGTCACAATTAGTGACCCCGCTTAAATCAGCGGAATCCGCTTTCCTCCGGTTCGCTGATTGCCAGCTTCCGGATGTGTCATCCCGCGATGAGACGGAATGGAGGAGTCTTCGCCAGCGCTGATCAGCGCGACAATTGCCCTTCCCTTGATTGCCATCAATTGCGCAAAACAGTCGCCGTGAATTGGGACTCGGATAGTACCGGGCAGTGATAAGCACAGCGAGTGGGAGAGAGTGTCAGTGATGGATTA	chr3L_1413264_1413512_+_dCP_twist_center230	twist	ACAAGTG	230	Trl	GAGAGAG	203	186	180	179	134	133	4.71236	4.23796	0.474394	2.9075	-1.33047	1.80486
chr3L_1413264_1413512_+_dCP_twist_center230_to_ETS	chr3L_1413264_1413512	+	GGTCACAATTAGTGACCCCGCTTAAATCAGCGGAATCCGCTTTCCTCCGGTTCGCTGATTGCCAGCTTCCGGATGTGTCATCCCGCGATGAGACGGAATGGAGGAGTCTTCGCCAGCGCTGATCAGCGCGACAATTGCCCTTCCCTTGATTGCCATCAATTGCGCAAAACAGTCGCCGTGAATTGGGACTCGGATAGTACCGGGCAGTGATAAGCACAGCGAGTGACCGGAAGTGTCAGTGATGGATTA	chr3L_1413264_1413512_+_dCP_twist_center230	twist	GACAAGTGT	230	ETS	ACCGGAAGT	177	119	145	728	669	807	7.39853	4.23796	3.16057	2.9075	-1.33047	4.49103
chr3L_1413264_1413512_+_dCP_twist_center230_to_SREBP	chr3L_1413264_1413512	+	GGTCACAATTAGTGACCCCGCTTAAATCAGCGGAATCCGCTTTCCTCCGGTTCGCTGATTGCCAGCTTCCGGATGTGTCATCCCGCGATGAGACGGAATGGAGGAGTCTTCGCCAGCGCTGATCAGCGCGACAATTGCCCTTCCCTTGATTGCCATCAATTGCGCAAAACAGTCGCCGTGAATTGGGACTCGGATAGTACCGGGCAGTGATAAGCACAGCGAGTGATCACGCGACTCAGTGATGGATTA	chr3L_1413264_1413512_+_dCP_twist_center230	twist	GACAAGTGTG	230	SREBP	ATCACGCGAC	189	172	138	601	535	626	6.89219	4.23796	2.65423	2.9075	-1.33047	3.98469
chr3L_1413264_1413512_+_dCP_twist_center230_to_Stat92E	chr3L_1413264_1413512	+	GGTCACAATTAGTGACCCCGCTTAAATCAGCGGAATCCGCTTTCCTCCGGTTCGCTGATTGCCAGCTTCCGGATGTGTCATCCCGCGATGAGACGGAATGGAGGAGTCTTCGCCAGCGCTGATCAGCGCGACAATTGCCCTTCCCTTGATTGCCATCAATTGCGCAAAACAGTCGCCGTGAATTGGGACTCGGATAGTACCGGGCAGTGATAAGCACAGCGAGTTTTCCCGGAAATCAGTGATGGATTA	chr3L_1413264_1413512_+_dCP_twist_center230	twist	GGACAAGTGTG	230	Stat92E	TTTCCCGGAAA	122	126	132	27	21	25	2.6745	4.23796	-1.56346	2.9075	-1.33047	-0.232997
chr3L_1413264_1413512_+_dCP_twist_center230_to_Atf2	chr3L_1413264_1413512	+	GGTCACAATTAGTGACCCCGCTTAAATCAGCGGAATCCGCTTTCCTCCGGTTCGCTGATTGCCAGCTTCCGGATGTGTCATCCCGCGATGAGACGGAATGGAGGAGTCTTCGCCAGCGCTGATCAGCGCGACAATTGCCCTTCCCTTGATTGCCATCAATTGCGCAAAACAGTCGCCGTGAATTGGGACTCGGATAGTACCGGGCAGTGATAAGCACAGCGAGTATCACGTCATCTCAGTGATGGATTA	chr3L_1413264_1413512_+_dCP_twist_center230	twist	GGACAAGTGTG	230	Atf2	ATCACGTCATC	187	202	173	149	125	136	4.60741	4.23796	0.369449	2.9075	-1.33047	1.69991
chr3L_815611_815859_+_dCP_twist_center64_to_GATAA	chr3L_815611_815859	+	CTCGTCGGAAAAAGCACCCGCCCACACCCCGCCCCAACGGGGGAAAGAGGAAGCAGAGTGAGATAAGAGTACCATTCGGGCAACCCCGATCTTCCAGAAATAGCGTGATAATCGCGGCACGCTCATCTGCCTTCTTTCTGGATCTTGATTTCCACTTCCGATTTAACTGGAAATGCATAAAAATATTCCCTTTTTTTGGGTGCCGGGCCATGTGTGTGGTTTTCCGCCCCAGCCGCCTCCCCCCTTTTA	chr3L_815611_815859_+_dCP_twist_center64	twist	ACATGTGG	64	GATAA	AGATAAGA	176	163	170	585	608	694	6.96677	3.89798	3.06879	2.59431	-1.30367	4.37246
chr3L_815611_815859_+_dCP_twist_center64_to_AP1	chr3L_815611_815859	+	CTCGTCGGAAAAAGCACCCGCCCACACCCCGCCCCAACGGGGGAAAGAGGAAGCAGAGTATGAGTCACGTACCATTCGGGCAACCCCGATCTTCCAGAAATAGCGTGATAATCGCGGCACGCTCATCTGCCTTCTTTCTGGATCTTGATTTCCACTTCCGATTTAACTGGAAATGCATAAAAATATTCCCTTTTTTTGGGTGCCGGGCCATGTGTGTGGTTTTCCGCCCCAGCCGCCTCCCCCCTTTTA	chr3L_815611_815859_+_dCP_twist_center64	twist	GACATGTGG	64	AP1	ATGAGTCAC	84	94	92	95	107	106	5.2649	3.89798	1.36691	2.59431	-1.30367	2.67059
chr3L_815611_815859_+_dCP_twist_center64_to_Trl	chr3L_815611_815859	+	CTCGTCGGAAAAAGCACCCGCCCACACCCCGCCCCAACGGGGGAAAGAGGAAGCAGAGTGGAGAGAGGGTACCATTCGGGCAACCCCGATCTTCCAGAAATAGCGTGATAATCGCGGCACGCTCATCTGCCTTCTTTCTGGATCTTGATTTCCACTTCCGATTTAACTGGAAATGCATAAAAATATTCCCTTTTTTTGGGTGCCGGGCCATGTGTGTGGTTTTCCGCCCCAGCCGCCTCCCCCCTTTTA	chr3L_815611_815859_+_dCP_twist_center64	twist	ACATGTG	64	Trl	GAGAGAG	170	156	149	33	30	26	2.65074	3.89798	-1.24724	2.59431	-1.30367	0.0564277
chr3L_815611_815859_+_dCP_twist_center64_to_ETS	chr3L_815611_815859	+	CTCGTCGGAAAAAGCACCCGCCCACACCCCGCCCCAACGGGGGAAAGAGGAAGCAGAGTACCGGAAGTGTACCATTCGGGCAACCCCGATCTTCCAGAAATAGCGTGATAATCGCGGCACGCTCATCTGCCTTCTTTCTGGATCTTGATTTCCACTTCCGATTTAACTGGAAATGCATAAAAATATTCCCTTTTTTTGGGTGCCGGGCCATGTGTGTGGTTTTCCGCCCCAGCCGCCTCCCCCCTTTTA	chr3L_815611_815859_+_dCP_twist_center64	twist	GACATGTGG	64	ETS	ACCGGAAGT	389	362	345	182	153	206	4.04222	3.89798	0.144235	2.59431	-1.30367	1.44791
chr3L_815611_815859_+_dCP_twist_center64_to_SREBP	chr3L_815611_815859	+	CTCGTCGGAAAAAGCACCCGCCCACACCCCGCCCCAACGGGGGAAAGAGGAAGCAGAGTATCACGCGACTACCATTCGGGCAACCCCGATCTTCCAGAAATAGCGTGATAATCGCGGCACGCTCATCTGCCTTCTTTCTGGATCTTGATTTCCACTTCCGATTTAACTGGAAATGCATAAAAATATTCCCTTTTTTTGGGTGCCGGGCCATGTGTGTGGTTTTCCGCCCCAGCCGCCTCCCCCCTTTTA	chr3L_815611_815859_+_dCP_twist_center64	twist	GACATGTGGG	64	SREBP	ATCACGCGAC	167	136	142	302	354	370	6.2943	3.89798	2.39631	2.59431	-1.30367	3.69999
chr3L_815611_815859_+_dCP_twist_center64_to_Stat92E	chr3L_815611_815859	+	CTCGTCGGAAAAAGCACCCGCCCACACCCCGCCCCAACGGGGGAAAGAGGAAGCAGAGTTTCCCGGAAATACCATTCGGGCAACCCCGATCTTCCAGAAATAGCGTGATAATCGCGGCACGCTCATCTGCCTTCTTTCTGGATCTTGATTTCCACTTCCGATTTAACTGGAAATGCATAAAAATATTCCCTTTTTTTGGGTGCCGGGCCATGTGTGTGGTTTTCCGCCCCAGCCGCCTCCCCCCTTTTA	chr3L_815611_815859_+_dCP_twist_center64	twist	TGACATGTGGG	64	Stat92E	TTTCCCGGAAA	470	416	460	48	64	60	2.11483	3.89798	-1.78315	2.59431	-1.30367	-0.479478
chr3L_815611_815859_+_dCP_twist_center64_to_Atf2	chr3L_815611_815859	+	CTCGTCGGAAAAAGCACCCGCCCACACCCCGCCCCAACGGGGGAAAGAGGAAGCAGAGATCACGTCATCTACCATTCGGGCAACCCCGATCTTCCAGAAATAGCGTGATAATCGCGGCACGCTCATCTGCCTTCTTTCTGGATCTTGATTTCCACTTCCGATTTAACTGGAAATGCATAAAAATATTCCCTTTTTTTGGGTGCCGGGCCATGTGTGTGGTTTTCCGCCCCAGCCGCCTCCCCCCTTTTA	chr3L_815611_815859_+_dCP_twist_center64	twist	TGACATGTGGG	64	Atf2	ATCACGTCATC	632	492	536	674	717	782	5.47385	3.89798	1.57587	2.59431	-1.30367	2.87954
chr2R_11632026_11632274_+_dCP_twist_center95_to_GATAA	chr2R_11632026_11632274	-	CTGTGATGGCCATCCGCCTTATCGAGGGTCTGCCAAATGAACTATGGGGCCATGGCCATGAGATACGATGAGGGTGTTCATGTCCAGCCGGAGATAAGATGTTTCCTTCGTTTCGATTCGTTTTTATGTGCGGCTGGGCAAAAATTATATGCTGATTGCAGTTTGCCGATAAGCGGAACGAAACCCAAACGAAATTATGACCATGCGGGTAGTATCTCTATCTCCCCACCGCTCAGAAAAGAACGAAAG	chr2R_11632026_11632274_+_dCP_twist_center95	twist	CCACATGT	95	GATAA	AGATAAGA	110	99	94	149	144	158	5.64684	4.5663	1.08054	2.96096	-1.60534	2.68588
chr2R_11632026_11632274_+_dCP_twist_center95_to_AP1	chr2R_11632026_11632274	-	CTGTGATGGCCATCCGCCTTATCGAGGGTCTGCCAAATGAACTATGGGGCCATGGCCATGAGATACGATGAGGGTGTTCATGTCCAGCCGATGAGTCACTGTTTCCTTCGTTTCGATTCGTTTTTATGTGCGGCTGGGCAAAAATTATATGCTGATTGCAGTTTGCCGATAAGCGGAACGAAACCCAAACGAAATTATGACCATGCGGGTAGTATCTCTATCTCCCCACCGCTCAGAAAAGAACGAAAG	chr2R_11632026_11632274_+_dCP_twist_center95	twist	GCCACATGT	95	AP1	ATGAGTCAC	229	172	204	259	222	264	5.36998	4.5663	0.80368	2.96096	-1.60534	2.40902
chr2R_11632026_11632274_+_dCP_twist_center95_to_Trl	chr2R_11632026_11632274	-	CTGTGATGGCCATCCGCCTTATCGAGGGTCTGCCAAATGAACTATGGGGCCATGGCCATGAGATACGATGAGGGTGTTCATGTCCAGCCGGGAGAGAGTTGTTTCCTTCGTTTCGATTCGTTTTTATGTGCGGCTGGGCAAAAATTATATGCTGATTGCAGTTTGCCGATAAGCGGAACGAAACCCAAACGAAATTATGACCATGCGGGTAGTATCTCTATCTCCCCACCGCTCAGAAAAGAACGAAAG	chr2R_11632026_11632274_+_dCP_twist_center95	twist	CCACATG	95	Trl	GAGAGAG	140	126	119	56	38	59	3.72243	4.5663	-0.84387	2.96096	-1.60534	0.761468
chr2R_11632026_11632274_+_dCP_twist_center95_to_ETS	chr2R_11632026_11632274	-	CTGTGATGGCCATCCGCCTTATCGAGGGTCTGCCAAATGAACTATGGGGCCATGGCCATGAGATACGATGAGGGTGTTCATGTCCAGCCGACCGGAAGTTGTTTCCTTCGTTTCGATTCGTTTTTATGTGCGGCTGGGCAAAAATTATATGCTGATTGCAGTTTGCCGATAAGCGGAACGAAACCCAAACGAAATTATGACCATGCGGGTAGTATCTCTATCTCCCCACCGCTCAGAAAAGAACGAAAG	chr2R_11632026_11632274_+_dCP_twist_center95	twist	GCCACATGT	95	ETS	ACCGGAAGT	337	261	310	624	527	555	5.98271	4.5663	1.41642	2.96096	-1.60534	3.02176
chr2R_11632026_11632274_+_dCP_twist_center95_to_SREBP	chr2R_11632026_11632274	-	CTGTGATGGCCATCCGCCTTATCGAGGGTCTGCCAAATGAACTATGGGGCCATGGCCATGAGATACGATGAGGGTGTTCATGTCCAGCCGATCACGCGACGTTTCCTTCGTTTCGATTCGTTTTTATGTGCGGCTGGGCAAAAATTATATGCTGATTGCAGTTTGCCGATAAGCGGAACGAAACCCAAACGAAATTATGACCATGCGGGTAGTATCTCTATCTCCCCACCGCTCAGAAAAGAACGAAAG	chr2R_11632026_11632274_+_dCP_twist_center95	twist	GCCACATGTT	95	SREBP	ATCACGCGAC	130	137	124	489	442	490	6.92982	4.5663	2.36353	2.96096	-1.60534	3.96887
chr2R_11632026_11632274_+_dCP_twist_center95_to_Stat92E	chr2R_11632026_11632274	-	CTGTGATGGCCATCCGCCTTATCGAGGGTCTGCCAAATGAACTATGGGGCCATGGCCATGAGATACGATGAGGGTGTTCATGTCCAGCCTTTCCCGGAAAGTTTCCTTCGTTTCGATTCGTTTTTATGTGCGGCTGGGCAAAAATTATATGCTGATTGCAGTTTGCCGATAAGCGGAACGAAACCCAAACGAAATTATGACCATGCGGGTAGTATCTCTATCTCCCCACCGCTCAGAAAAGAACGAAAG	chr2R_11632026_11632274_+_dCP_twist_center95	twist	GGCCACATGTT	95	Stat92E	TTTCCCGGAAA	67	50	51	11	15	10	2.8552	4.5663	-1.71109	2.96096	-1.60534	-0.105755
chr2R_11632026_11632274_+_dCP_twist_center95_to_Atf2	chr2R_11632026_11632274	-	CTGTGATGGCCATCCGCCTTATCGAGGGTCTGCCAAATGAACTATGGGGCCATGGCCATGAGATACGATGAGGGTGTTCATGTCCAGCCATCACGTCATCGTTTCCTTCGTTTCGATTCGTTTTTATGTGCGGCTGGGCAAAAATTATATGCTGATTGCAGTTTGCCGATAAGCGGAACGAAACCCAAACGAAATTATGACCATGCGGGTAGTATCTCTATCTCCCCACCGCTCAGAAAAGAACGAAAG	chr2R_11632026_11632274_+_dCP_twist_center95	twist	GGCCACATGTT	95	Atf2	ATCACGTCATC	119	111	108	180	141	156	5.55972	4.5663	0.99342	2.96096	-1.60534	2.59876
chrX_19562579_19562827_+_dCP_twist_center165_to_GATAA	chrX_19562579_19562827	-	GAAAGATTACACAGCCAGTGAGTTGGATGGTGCTGGTGGATGGATGGATGGTGACTAAGAGGCTAGCGAGCTCCTTCAAATGCCGAGATTGTGAGTCACAAGCCGACAGTGGTGTTTGCCTAGCAGGAACATAAATGACTTTAACCTTTTTTTTGAGTTTGAGATAAGACTTAATTTCCCGTTTGTTTTGCCTTGCTTGCTCAAGTCTTCGCATTTTTGCTTGACTCAGCTTGGTTTCACTTATCGAAG	chrX_19562579_19562827_+_dCP_twist_center165	twist	CCATATGT	165	GATAA	AGATAAGA	196	184	158	1046	1115	1233	7.73909	6.90607	0.83302	5.09541	-1.81066	2.64368
chrX_19562579_19562827_+_dCP_twist_center165_to_AP1	chrX_19562579_19562827	-	GAAAGATTACACAGCCAGTGAGTTGGATGGTGCTGGTGGATGGATGGATGGTGACTAAGAGGCTAGCGAGCTCCTTCAAATGCCGAGATTGTGAGTCACAAGCCGACAGTGGTGTTTGCCTAGCAGGAACATAAATGACTTTAACCTTTTTTTTGAGTTTATGAGTCACCTTAATTTCCCGTTTGTTTTGCCTTGCTTGCTCAAGTCTTCGCATTTTTGCTTGACTCAGCTTGGTTTCACTTATCGAAG	chrX_19562579_19562827_+_dCP_twist_center165	twist	GCCATATGT	165	AP1	ATGAGTCAC	191	174	177	859	981	1185	7.5606	6.90607	0.65453	5.09541	-1.81066	2.46519
chrX_19562579_19562827_+_dCP_twist_center165_to_Trl	chrX_19562579_19562827	-	GAAAGATTACACAGCCAGTGAGTTGGATGGTGCTGGTGGATGGATGGATGGTGACTAAGAGGCTAGCGAGCTCCTTCAAATGCCGAGATTGTGAGTCACAAGCCGACAGTGGTGTTTGCCTAGCAGGAACATAAATGACTTTAACCTTTTTTTTGAGTTTGGAGAGAGTCTTAATTTCCCGTTTGTTTTGCCTTGCTTGCTCAAGTCTTCGCATTTTTGCTTGACTCAGCTTGGTTTCACTTATCGAAG	chrX_19562579_19562827_+_dCP_twist_center165	twist	CCATATG	165	Trl	GAGAGAG	341	311	327	233	282	334	4.87533	6.90607	-2.03074	5.09541	-1.81066	-0.220075
chrX_19562579_19562827_+_dCP_twist_center165_to_ETS	chrX_19562579_19562827	-	GAAAGATTACACAGCCAGTGAGTTGGATGGTGCTGGTGGATGGATGGATGGTGACTAAGAGGCTAGCGAGCTCCTTCAAATGCCGAGATTGTGAGTCACAAGCCGACAGTGGTGTTTGCCTAGCAGGAACATAAATGACTTTAACCTTTTTTTTGAGTTTACCGGAAGTCTTAATTTCCCGTTTGTTTTGCCTTGCTTGCTCAAGTCTTCGCATTTTTGCTTGACTCAGCTTGGTTTCACTTATCGAAG	chrX_19562579_19562827_+_dCP_twist_center165	twist	GCCATATGT	165	ETS	ACCGGAAGT	362	308	320	1990	2097	2357	7.78419	6.90607	0.878118	5.09541	-1.81066	2.68878
chrX_19562579_19562827_+_dCP_twist_center165_to_SREBP	chrX_19562579_19562827	-	GAAAGATTACACAGCCAGTGAGTTGGATGGTGCTGGTGGATGGATGGATGGTGACTAAGAGGCTAGCGAGCTCCTTCAAATGCCGAGATTGTGAGTCACAAGCCGACAGTGGTGTTTGCCTAGCAGGAACATAAATGACTTTAACCTTTTTTTTGAGTTTATCACGCGACTTAATTTCCCGTTTGTTTTGCCTTGCTTGCTCAAGTCTTCGCATTTTTGCTTGACTCAGCTTGGTTTCACTTATCGAAG	chrX_19562579_19562827_+_dCP_twist_center165	twist	GCCATATGTC	165	SREBP	ATCACGCGAC	360	315	301	2012	2154	2600	7.87325	6.90607	0.967184	5.09541	-1.81066	2.77785
chrX_19562579_19562827_+_dCP_twist_center165_to_Stat92E	chrX_19562579_19562827	-	GAAAGATTACACAGCCAGTGAGTTGGATGGTGCTGGTGGATGGATGGATGGTGACTAAGAGGCTAGCGAGCTCCTTCAAATGCCGAGATTGTGAGTCACAAGCCGACAGTGGTGTTTGCCTAGCAGGAACATAAATGACTTTAACCTTTTTTTTGAGTTTTTCCCGGAAATTAATTTCCCGTTTGTTTTGCCTTGCTTGCTCAAGTCTTCGCATTTTTGCTTGACTCAGCTTGGTTTCACTTATCGAAG	chrX_19562579_19562827_+_dCP_twist_center165	twist	TGCCATATGTC	165	Stat92E	TTTCCCGGAAA	167	151	140	205	209	226	5.56009	6.90607	-1.34598	5.09541	-1.81066	0.464684
chrX_19562579_19562827_+_dCP_twist_center165_to_Atf2	chrX_19562579_19562827	-	GAAAGATTACACAGCCAGTGAGTTGGATGGTGCTGGTGGATGGATGGATGGTGACTAAGAGGCTAGCGAGCTCCTTCAAATGCCGAGATTGTGAGTCACAAGCCGACAGTGGTGTTTGCCTAGCAGGAACATAAATGACTTTAACCTTTTTTTTGAGTTATCACGTCATCTTAATTTCCCGTTTGTTTTGCCTTGCTTGCTCAAGTCTTCGCATTTTTGCTTGACTCAGCTTGGTTTCACTTATCGAAG	chrX_19562579_19562827_+_dCP_twist_center165	twist	TGCCATATGTC	165	Atf2	ATCACGTCATC	218	227	179	419	501	548	6.31842	6.90607	-0.587645	5.09541	-1.81066	1.22302
chr2R_3513788_3514036_+_dCP_twist_center157_to_GATAA	chr2R_3513788_3514036	+	CACTGAGATACAAATGTATCTCATGAATATCATGAAGTGGAAGGTGACAGACCAACGCGGATATTTGGGGGGAGCTTTTTGAGATGCGTAGCGATGAGGCATCGCCAGATTCCAGGTTATCTGCAGCTGGGCGGGGGTTCGTTATCTGCCGTCAGATAAGATTATGGGTCTCTGCCGTAAAAATAAACCAAAATTCCTTTGATTGCAGAACGAAAGCAAACGCTCCCAGGCACACACATACACACACGC	chr2R_3513788_3514036_+_dCP_twist_center157	twist	GCATTTGT	157	GATAA	AGATAAGA	70	65	67	3	2	4	0.567071	4.09689	-3.52982	1.83966	-2.25724	-1.27259
chr2R_3513788_3514036_+_dCP_twist_center157_to_AP1	chr2R_3513788_3514036	+	CACTGAGATACAAATGTATCTCATGAATATCATGAAGTGGAAGGTGACAGACCAACGCGGATATTTGGGGGGAGCTTTTTGAGATGCGTAGCGATGAGGCATCGCCAGATTCCAGGTTATCTGCAGCTGGGCGGGGGTTCGTTATCTGCCGTATGAGTCACTTATGGGTCTCTGCCGTAAAAATAAACCAAAATTCCTTTGATTGCAGAACGAAAGCAAACGCTCCCAGGCACACACATACACACACGC	chr2R_3513788_3514036_+_dCP_twist_center157	twist	CGCATTTGT	157	AP1	ATGAGTCAC	74	59	59	94	101	112	5.75587	4.09689	1.65897	1.83966	-2.25724	3.91621
chr2R_3513788_3514036_+_dCP_twist_center157_to_Trl	chr2R_3513788_3514036	+	CACTGAGATACAAATGTATCTCATGAATATCATGAAGTGGAAGGTGACAGACCAACGCGGATATTTGGGGGGAGCTTTTTGAGATGCGTAGCGATGAGGCATCGCCAGATTCCAGGTTATCTGCAGCTGGGCGGGGGTTCGTTATCTGCCGTCGAGAGAGTTTATGGGTCTCTGCCGTAAAAATAAACCAAAATTCCTTTGATTGCAGAACGAAAGCAAACGCTCCCAGGCACACACATACACACACGC	chr2R_3513788_3514036_+_dCP_twist_center157	twist	GCATTTG	157	Trl	GAGAGAG	131	121	123	22	22	29	2.70062	4.09689	-1.39627	1.83966	-2.25724	0.860963
chr2R_3513788_3514036_+_dCP_twist_center157_to_ETS	chr2R_3513788_3514036	+	CACTGAGATACAAATGTATCTCATGAATATCATGAAGTGGAAGGTGACAGACCAACGCGGATATTTGGGGGGAGCTTTTTGAGATGCGTAGCGATGAGGCATCGCCAGATTCCAGGTTATCTGCAGCTGGGCGGGGGTTCGTTATCTGCCGTACCGGAAGTTTATGGGTCTCTGCCGTAAAAATAAACCAAAATTCCTTTGATTGCAGAACGAAAGCAAACGCTCCCAGGCACACACATACACACACGC	chr2R_3513788_3514036_+_dCP_twist_center157	twist	CGCATTTGT	157	ETS	ACCGGAAGT	173	154	147	723	775	851	7.39145	4.09689	3.29456	1.83966	-2.25724	5.55179
chr2R_3513788_3514036_+_dCP_twist_center157_to_SREBP	chr2R_3513788_3514036	+	CACTGAGATACAAATGTATCTCATGAATATCATGAAGTGGAAGGTGACAGACCAACGCGGATATTTGGGGGGAGCTTTTTGAGATGCGTAGCGATGAGGCATCGCCAGATTCCAGGTTATCTGCAGCTGGGCGGGGGTTCGTTATCTGCCGTATCACGCGACTATGGGTCTCTGCCGTAAAAATAAACCAAAATTCCTTTGATTGCAGAACGAAAGCAAACGCTCCCAGGCACACACATACACACACGC	chr2R_3513788_3514036_+_dCP_twist_center157	twist	CGCATTTGTT	157	SREBP	ATCACGCGAC	214	152	177	87	66	67	3.76537	4.09689	-0.331523	1.83966	-2.25724	1.92571
chr2R_3513788_3514036_+_dCP_twist_center157_to_Stat92E	chr2R_3513788_3514036	+	CACTGAGATACAAATGTATCTCATGAATATCATGAAGTGGAAGGTGACAGACCAACGCGGATATTTGGGGGGAGCTTTTTGAGATGCGTAGCGATGAGGCATCGCCAGATTCCAGGTTATCTGCAGCTGGGCGGGGGTTCGTTATCTGCCGTTTCCCGGAAATATGGGTCTCTGCCGTAAAAATAAACCAAAATTCCTTTGATTGCAGAACGAAAGCAAACGCTCCCAGGCACACACATACACACACGC	chr2R_3513788_3514036_+_dCP_twist_center157	twist	TCGCATTTGTT	157	Stat92E	TTTCCCGGAAA	188	145	190	975	988	1100	7.62957	4.09689	3.53267	1.83966	-2.25724	5.78991
chr2R_3513788_3514036_+_dCP_twist_center157_to_Atf2	chr2R_3513788_3514036	+	CACTGAGATACAAATGTATCTCATGAATATCATGAAGTGGAAGGTGACAGACCAACGCGGATATTTGGGGGGAGCTTTTTGAGATGCGTAGCGATGAGGCATCGCCAGATTCCAGGTTATCTGCAGCTGGGCGGGGGTTCGTTATCTGCCGATCACGTCATCTATGGGTCTCTGCCGTAAAAATAAACCAAAATTCCTTTGATTGCAGAACGAAAGCAAACGCTCCCAGGCACACACATACACACACGC	chr2R_3513788_3514036_+_dCP_twist_center157	twist	TCGCATTTGTT	157	Atf2	ATCACGTCATC	106	80	81	54	65	79	4.64917	4.09689	0.552272	1.83966	-2.25724	2.80951
chrX_8473943_8474191_+_dCP_twist_center54_to_GATAA	chrX_8473943_8474191	-	TATTGTATTTCATTATGATGACTTTTATCGCCCGTGACGCAATATTCGTGAGATAAGAGACTATTGAAATCGGCAAACCAGTTGCCATCTGAGCGCTCTGACCTTCAAAAGCAAACAATCTGAGCTTGGAAAAGAACACGATAGCTCGGGAAAACCCATCTAGTGCTTATCTTCAGCTTTAGTGGGCCACTCCATTGTTACTCACATATTATTCTATGTATGTTTCGCTGACTTGTTACCAAGAGATCA	chrX_8473943_8474191_+_dCP_twist_center54	twist	GCATTTGC	54	GATAA	AGATAAGA	97	73	77	103	88	100	5.30618	4.80361	0.502572	3.07438	-1.72923	2.2318
chrX_8473943_8474191_+_dCP_twist_center54_to_AP1	chrX_8473943_8474191	-	TATTGTATTTCATTATGATGACTTTTATCGCCCGTGACGCAATATTCGTATGAGTCACGACTATTGAAATCGGCAAACCAGTTGCCATCTGAGCGCTCTGACCTTCAAAAGCAAACAATCTGAGCTTGGAAAAGAACACGATAGCTCGGGAAAACCCATCTAGTGCTTATCTTCAGCTTTAGTGGGCCACTCCATTGTTACTCACATATTATTCTATGTATGTTTCGCTGACTTGTTACCAAGAGATCA	chrX_8473943_8474191_+_dCP_twist_center54	twist	GGCATTTGC	54	AP1	ATGAGTCAC	76	62	57	133	108	131	5.99773	4.80361	1.19411	3.07438	-1.72923	2.92334
chrX_8473943_8474191_+_dCP_twist_center54_to_Trl	chrX_8473943_8474191	-	TATTGTATTTCATTATGATGACTTTTATCGCCCGTGACGCAATATTCGTGGAGAGAGCGACTATTGAAATCGGCAAACCAGTTGCCATCTGAGCGCTCTGACCTTCAAAAGCAAACAATCTGAGCTTGGAAAAGAACACGATAGCTCGGGAAAACCCATCTAGTGCTTATCTTCAGCTTTAGTGGGCCACTCCATTGTTACTCACATATTATTCTATGTATGTTTCGCTGACTTGTTACCAAGAGATCA	chrX_8473943_8474191_+_dCP_twist_center54	twist	GCATTTG	54	Trl	GAGAGAG	83	84	71	39	34	37	3.94916	4.80361	-0.854455	3.07438	-1.72923	0.874773
chrX_8473943_8474191_+_dCP_twist_center54_to_ETS	chrX_8473943_8474191	-	TATTGTATTTCATTATGATGACTTTTATCGCCCGTGACGCAATATTCGTACCGGAAGTGACTATTGAAATCGGCAAACCAGTTGCCATCTGAGCGCTCTGACCTTCAAAAGCAAACAATCTGAGCTTGGAAAAGAACACGATAGCTCGGGAAAACCCATCTAGTGCTTATCTTCAGCTTTAGTGGGCCACTCCATTGTTACTCACATATTATTCTATGTATGTTTCGCTGACTTGTTACCAAGAGATCA	chrX_8473943_8474191_+_dCP_twist_center54	twist	GGCATTTGC	54	ETS	ACCGGAAGT	237	208	195	904	959	1124	7.30289	4.80361	2.49927	3.07438	-1.72923	4.2285
chrX_8473943_8474191_+_dCP_twist_center54_to_SREBP	chrX_8473943_8474191	-	TATTGTATTTCATTATGATGACTTTTATCGCCCGTGACGCAATATTCGTATCACGCGACACTATTGAAATCGGCAAACCAGTTGCCATCTGAGCGCTCTGACCTTCAAAAGCAAACAATCTGAGCTTGGAAAAGAACACGATAGCTCGGGAAAACCCATCTAGTGCTTATCTTCAGCTTTAGTGGGCCACTCCATTGTTACTCACATATTATTCTATGTATGTTTCGCTGACTTGTTACCAAGAGATCA	chrX_8473943_8474191_+_dCP_twist_center54	twist	GGCATTTGCG	54	SREBP	ATCACGCGAC	186	149	155	745	819	964	7.45063	4.80361	2.64702	3.07438	-1.72923	4.37625
chrX_8473943_8474191_+_dCP_twist_center54_to_Stat92E	chrX_8473943_8474191	-	TATTGTATTTCATTATGATGACTTTTATCGCCCGTGACGCAATATTCGTTTCCCGGAAAACTATTGAAATCGGCAAACCAGTTGCCATCTGAGCGCTCTGACCTTCAAAAGCAAACAATCTGAGCTTGGAAAAGAACACGATAGCTCGGGAAAACCCATCTAGTGCTTATCTTCAGCTTTAGTGGGCCACTCCATTGTTACTCACATATTATTCTATGTATGTTTCGCTGACTTGTTACCAAGAGATCA	chrX_8473943_8474191_+_dCP_twist_center54	twist	TGGCATTTGCG	54	Stat92E	TTTCCCGGAAA	82	90	69	68	66	78	4.88069	4.80361	0.0770795	3.07438	-1.72923	1.80631
chrX_8473943_8474191_+_dCP_twist_center54_to_Atf2	chrX_8473943_8474191	-	TATTGTATTTCATTATGATGACTTTTATCGCCCGTGACGCAATATTCGATCACGTCATCACTATTGAAATCGGCAAACCAGTTGCCATCTGAGCGCTCTGACCTTCAAAAGCAAACAATCTGAGCTTGGAAAAGAACACGATAGCTCGGGAAAACCCATCTAGTGCTTATCTTCAGCTTTAGTGGGCCACTCCATTGTTACTCACATATTATTCTATGTATGTTTCGCTGACTTGTTACCAAGAGATCA	chrX_8473943_8474191_+_dCP_twist_center54	twist	TGGCATTTGCG	54	Atf2	ATCACGTCATC	155	131	144	136	125	155	5.01957	4.80361	0.215956	3.07438	-1.72923	1.94519
chrX_4808608_4808856_+_dCP_twist_center33_to_GATAA	chrX_4808608_4808856	-	TTTTATAAGTCAGTTGTGTTTTTGTCTGTAGATAAGATGCTGCTGCTTTTTCTCCTTATCTCTTTCGATGTCATGCATTGCTGCTAATATTCTTGGAAATTTATTCAGGGGCATTTGGTTCCTCTATTGCTTTGGCTGCTGAATTCAAAACAGGAAGTGGGAGACAGACACCAAACTGAACCAGCAGCTTGCCGCCGACTCTAAATTCGGGATGTTTTGGAAGTCCACTCGCCGATTTCAAGATAATTA	chrX_4808608_4808856_+_dCP_twist_center33	twist	CCATCTGG	33	GATAA	AGATAAGA	139	105	111	428	456	586	7.12962	5.93739	1.19223	4.88644	-1.05095	2.24318
chrX_4808608_4808856_+_dCP_twist_center33_to_AP1	chrX_4808608_4808856	-	TTTTATAAGTCAGTTGTGTTTTTGTCTGATGAGTCACTGCTGCTGCTTTTTCTCCTTATCTCTTTCGATGTCATGCATTGCTGCTAATATTCTTGGAAATTTATTCAGGGGCATTTGGTTCCTCTATTGCTTTGGCTGCTGAATTCAAAACAGGAAGTGGGAGACAGACACCAAACTGAACCAGCAGCTTGCCGCCGACTCTAAATTCGGGATGTTTTGGAAGTCCACTCGCCGATTTCAAGATAATTA	chrX_4808608_4808856_+_dCP_twist_center33	twist	TCCATCTGG	33	AP1	ATGAGTCAC	147	117	104	483	558	653	7.2909	5.93739	1.35351	4.88644	-1.05095	2.40446
chrX_4808608_4808856_+_dCP_twist_center33_to_Trl	chrX_4808608_4808856	-	TTTTATAAGTCAGTTGTGTTTTTGTCTGTGAGAGAGGTGCTGCTGCTTTTTCTCCTTATCTCTTTCGATGTCATGCATTGCTGCTAATATTCTTGGAAATTTATTCAGGGGCATTTGGTTCCTCTATTGCTTTGGCTGCTGAATTCAAAACAGGAAGTGGGAGACAGACACCAAACTGAACCAGCAGCTTGCCGCCGACTCTAAATTCGGGATGTTTTGGAAGTCCACTCGCCGATTTCAAGATAATTA	chrX_4808608_4808856_+_dCP_twist_center33	twist	CCATCTG	33	Trl	GAGAGAG	177	152	148	149	138	163	4.98613	5.93739	-0.951267	4.88644	-1.05095	0.0996879
chrX_4808608_4808856_+_dCP_twist_center33_to_ETS	chrX_4808608_4808856	-	TTTTATAAGTCAGTTGTGTTTTTGTCTGACCGGAAGTTGCTGCTGCTTTTTCTCCTTATCTCTTTCGATGTCATGCATTGCTGCTAATATTCTTGGAAATTTATTCAGGGGCATTTGGTTCCTCTATTGCTTTGGCTGCTGAATTCAAAACAGGAAGTGGGAGACAGACACCAAACTGAACCAGCAGCTTGCCGCCGACTCTAAATTCGGGATGTTTTGGAAGTCCACTCGCCGATTTCAAGATAATTA	chrX_4808608_4808856_+_dCP_twist_center33	twist	TCCATCTGG	33	ETS	ACCGGAAGT	131	112	119	436	488	584	7.13897	5.93739	1.20157	4.88644	-1.05095	2.25253
chrX_4808608_4808856_+_dCP_twist_center33_to_SREBP	chrX_4808608_4808856	-	TTTTATAAGTCAGTTGTGTTTTTGTCTGATCACGCGACGCTGCTGCTTTTTCTCCTTATCTCTTTCGATGTCATGCATTGCTGCTAATATTCTTGGAAATTTATTCAGGGGCATTTGGTTCCTCTATTGCTTTGGCTGCTGAATTCAAAACAGGAAGTGGGAGACAGACACCAAACTGAACCAGCAGCTTGCCGCCGACTCTAAATTCGGGATGTTTTGGAAGTCCACTCGCCGATTTCAAGATAATTA	chrX_4808608_4808856_+_dCP_twist_center33	twist	TCCATCTGGT	33	SREBP	ATCACGCGAC	84	78	82	628	723	845	8.25068	5.93739	2.31329	4.88644	-1.05095	3.36424
chrX_4808608_4808856_+_dCP_twist_center33_to_Stat92E	chrX_4808608_4808856	-	TTTTATAAGTCAGTTGTGTTTTTGTCTTTTCCCGGAAAGCTGCTGCTTTTTCTCCTTATCTCTTTCGATGTCATGCATTGCTGCTAATATTCTTGGAAATTTATTCAGGGGCATTTGGTTCCTCTATTGCTTTGGCTGCTGAATTCAAAACAGGAAGTGGGAGACAGACACCAAACTGAACCAGCAGCTTGCCGCCGACTCTAAATTCGGGATGTTTTGGAAGTCCACTCGCCGATTTCAAGATAATTA	chrX_4808608_4808856_+_dCP_twist_center33	twist	GTCCATCTGGT	33	Stat92E	TTTCCCGGAAA	225	242	237	237	266	314	5.28748	5.93739	-0.649909	4.88644	-1.05095	0.401046
chrX_4808608_4808856_+_dCP_twist_center33_to_Atf2	chrX_4808608_4808856	-	TTTTATAAGTCAGTTGTGTTTTTGTCTATCACGTCATCGCTGCTGCTTTTTCTCCTTATCTCTTTCGATGTCATGCATTGCTGCTAATATTCTTGGAAATTTATTCAGGGGCATTTGGTTCCTCTATTGCTTTGGCTGCTGAATTCAAAACAGGAAGTGGGAGACAGACACCAAACTGAACCAGCAGCTTGCCGCCGACTCTAAATTCGGGATGTTTTGGAAGTCCACTCGCCGATTTCAAGATAATTA	chrX_4808608_4808856_+_dCP_twist_center33	twist	GTCCATCTGGT	33	Atf2	ATCACGTCATC	197	135	165	273	291	348	5.95898	5.93739	0.0215827	4.88644	-1.05095	1.07254
chr3R_26577795_26578043_+_dCP_twist_center182_to_GATAA	chr3R_26577795_26578043	+	AAAAAGCCGAACCCTGTCATTTATAGAAACGCAAATTTATCAGCCGCATGATTTCATTGCCGTCCATTGCTAAACGCTGCGCAGCTGAGGCCCTGAACCTGAATATCTGGATCTGAAACAGAAGCTGAATCTGAATCCGAATGTGAATCTCATCTGGCCGAGTCACGTAAGAAATGTCAGATAAGAGCGGTTCGTCATCGTTGCCCCGCTCATTTCGAGCTGTCGAATATGTATCTGAGTGTGAATGTG	chr3R_26577795_26578043_+_dCP_twist_center182	twist	GCATGTGG	182	GATAA	AGATAAGA	113	105	93	326	371	452	6.96516	5.13836	1.8268	3.34935	-1.78901	3.61581
chr3R_26577795_26578043_+_dCP_twist_center182_to_AP1	chr3R_26577795_26578043	+	AAAAAGCCGAACCCTGTCATTTATAGAAACGCAAATTTATCAGCCGCATGATTTCATTGCCGTCCATTGCTAAACGCTGCGCAGCTGAGGCCCTGAACCTGAATATCTGGATCTGAAACAGAAGCTGAATCTGAATCCGAATGTGAATCTCATCTGGCCGAGTCACGTAAGAAATGTATGAGTCACGCGGTTCGTCATCGTTGCCCCGCTCATTTCGAGCTGTCGAATATGTATCTGAGTGTGAATGTG	chr3R_26577795_26578043_+_dCP_twist_center182	twist	CGCATGTGG	182	AP1	ATGAGTCAC	224	178	189	769	855	1048	7.25918	5.13836	2.12083	3.34935	-1.78901	3.90983
chr3R_26577795_26578043_+_dCP_twist_center182_to_Trl	chr3R_26577795_26578043	+	AAAAAGCCGAACCCTGTCATTTATAGAAACGCAAATTTATCAGCCGCATGATTTCATTGCCGTCCATTGCTAAACGCTGCGCAGCTGAGGCCCTGAACCTGAATATCTGGATCTGAAACAGAAGCTGAATCTGAATCCGAATGTGAATCTCATCTGGCCGAGTCACGTAAGAAATGTCGAGAGAGGGCGGTTCGTCATCGTTGCCCCGCTCATTTCGAGCTGTCGAATATGTATCTGAGTGTGAATGTG	chr3R_26577795_26578043_+_dCP_twist_center182	twist	GCATGTG	182	Trl	GAGAGAG	94	87	90	81	124	143	5.44984	5.13836	0.31148	3.34935	-1.78901	2.10049
chr3R_26577795_26578043_+_dCP_twist_center182_to_ETS	chr3R_26577795_26578043	+	AAAAAGCCGAACCCTGTCATTTATAGAAACGCAAATTTATCAGCCGCATGATTTCATTGCCGTCCATTGCTAAACGCTGCGCAGCTGAGGCCCTGAACCTGAATATCTGGATCTGAAACAGAAGCTGAATCTGAATCCGAATGTGAATCTCATCTGGCCGAGTCACGTAAGAAATGTACCGGAAGTGCGGTTCGTCATCGTTGCCCCGCTCATTTCGAGCTGTCGAATATGTATCTGAGTGTGAATGTG	chr3R_26577795_26578043_+_dCP_twist_center182	twist	CGCATGTGG	182	ETS	ACCGGAAGT	130	108	104	575	618	828	7.63981	5.13836	2.50145	3.34935	-1.78901	4.29046
chr3R_26577795_26578043_+_dCP_twist_center182_to_SREBP	chr3R_26577795_26578043	+	AAAAAGCCGAACCCTGTCATTTATAGAAACGCAAATTTATCAGCCGCATGATTTCATTGCCGTCCATTGCTAAACGCTGCGCAGCTGAGGCCCTGAACCTGAATATCTGGATCTGAAACAGAAGCTGAATCTGAATCCGAATGTGAATCTCATCTGGCCGAGTCACGTAAGAAATGTATCACGCGACCGGTTCGTCATCGTTGCCCCGCTCATTTCGAGCTGTCGAATATGTATCTGAGTGTGAATGTG	chr3R_26577795_26578043_+_dCP_twist_center182	twist	CGCATGTGGG	182	SREBP	ATCACGCGAC	105	106	102	560	655	764	7.74028	5.13836	2.60192	3.34935	-1.78901	4.39092
chr3R_26577795_26578043_+_dCP_twist_center182_to_Stat92E	chr3R_26577795_26578043	+	AAAAAGCCGAACCCTGTCATTTATAGAAACGCAAATTTATCAGCCGCATGATTTCATTGCCGTCCATTGCTAAACGCTGCGCAGCTGAGGCCCTGAACCTGAATATCTGGATCTGAAACAGAAGCTGAATCTGAATCCGAATGTGAATCTCATCTGGCCGAGTCACGTAAGAAATGTTTCCCGGAAACGGTTCGTCATCGTTGCCCCGCTCATTTCGAGCTGTCGAATATGTATCTGAGTGTGAATGTG	chr3R_26577795_26578043_+_dCP_twist_center182	twist	TCGCATGTGGG	182	Stat92E	TTTCCCGGAAA	237	198	231	1516	1615	1943	8.00776	5.13836	2.8694	3.34935	-1.78901	4.65841
chr3R_26577795_26578043_+_dCP_twist_center182_to_Atf2	chr3R_26577795_26578043	+	AAAAAGCCGAACCCTGTCATTTATAGAAACGCAAATTTATCAGCCGCATGATTTCATTGCCGTCCATTGCTAAACGCTGCGCAGCTGAGGCCCTGAACCTGAATATCTGGATCTGAAACAGAAGCTGAATCTGAATCCGAATGTGAATCTCATCTGGCCGAGTCACGTAAGAAATGATCACGTCATCCGGTTCGTCATCGTTGCCCCGCTCATTTCGAGCTGTCGAATATGTATCTGAGTGTGAATGTG	chr3R_26577795_26578043_+_dCP_twist_center182	twist	TCGCATGTGGG	182	Atf2	ATCACGTCATC	268	255	217	2072	2328	2703	8.34519	5.13836	3.20683	3.34935	-1.78901	4.99583
chrX_9766915_9767163_+_dCP_twist_center144_to_GATAA	chrX_9766915_9767163	+	TACCACGCGACAACCCATTGAATATTTAACGGCAATTACGGAACGAGAGACGTCACAGATCCAACATATTTACCCTCGTTATCGCACCGCACACCCGCTGAAATTTCCCGAAAATGTGACCGAATAATGGTCTTGCCAGAAGATAAGAGTGTTATTATTATAGCGCTGAGTCAGAAGTGTTCCTCGACTCATCGTTATCTCATTGACGCCGGAGTTGTCGGGTCTAGTGCTCTGTGTATAGTATCTTGT	chrX_9766915_9767163_+_dCP_twist_center144	twist	GCAACTGA	144	GATAA	AGATAAGA	147	122	148	674	723	895	7.53508	5.21569	2.31938	3.36426	-1.85143	4.17082
chrX_9766915_9767163_+_dCP_twist_center144_to_AP1	chrX_9766915_9767163	+	TACCACGCGACAACCCATTGAATATTTAACGGCAATTACGGAACGAGAGACGTCACAGATCCAACATATTTACCCTCGTTATCGCACCGCACACCCGCTGAAATTTCCCGAAAATGTGACCGAATAATGGTCTTGCCAGATGAGTCACGTGTTATTATTATAGCGCTGAGTCAGAAGTGTTCCTCGACTCATCGTTATCTCATTGACGCCGGAGTTGTCGGGTCTAGTGCTCTGTGTATAGTATCTTGT	chrX_9766915_9767163_+_dCP_twist_center144	twist	AGCAACTGA	144	AP1	ATGAGTCAC	193	172	157	446	526	632	6.70308	5.21569	1.48739	3.36426	-1.85143	3.33883
chrX_9766915_9767163_+_dCP_twist_center144_to_Trl	chrX_9766915_9767163	+	TACCACGCGACAACCCATTGAATATTTAACGGCAATTACGGAACGAGAGACGTCACAGATCCAACATATTTACCCTCGTTATCGCACCGCACACCCGCTGAAATTTCCCGAAAATGTGACCGAATAATGGTCTTGCCAGAGAGAGAGAGTGTTATTATTATAGCGCTGAGTCAGAAGTGTTCCTCGACTCATCGTTATCTCATTGACGCCGGAGTTGTCGGGTCTAGTGCTCTGTGTATAGTATCTTGT	chrX_9766915_9767163_+_dCP_twist_center144	twist	GCAACTG	144	Trl	GAGAGAG	179	140	153	116	115	159	4.79482	5.21569	-0.420875	3.36426	-1.85143	1.43056
chrX_9766915_9767163_+_dCP_twist_center144_to_ETS	chrX_9766915_9767163	+	TACCACGCGACAACCCATTGAATATTTAACGGCAATTACGGAACGAGAGACGTCACAGATCCAACATATTTACCCTCGTTATCGCACCGCACACCCGCTGAAATTTCCCGAAAATGTGACCGAATAATGGTCTTGCCAGACCGGAAGTGTGTTATTATTATAGCGCTGAGTCAGAAGTGTTCCTCGACTCATCGTTATCTCATTGACGCCGGAGTTGTCGGGTCTAGTGCTCTGTGTATAGTATCTTGT	chrX_9766915_9767163_+_dCP_twist_center144	twist	AGCAACTGA	144	ETS	ACCGGAAGT	517	399	451	2852	3075	3528	7.87474	5.21569	2.65904	3.36426	-1.85143	4.51048
chrX_9766915_9767163_+_dCP_twist_center144_to_SREBP	chrX_9766915_9767163	+	TACCACGCGACAACCCATTGAATATTTAACGGCAATTACGGAACGAGAGACGTCACAGATCCAACATATTTACCCTCGTTATCGCACCGCACACCCGCTGAAATTTCCCGAAAATGTGACCGAATAATGGTCTTGCCAGATCACGCGACTGTTATTATTATAGCGCTGAGTCAGAAGTGTTCCTCGACTCATCGTTATCTCATTGACGCCGGAGTTGTCGGGTCTAGTGCTCTGTGTATAGTATCTTGT	chrX_9766915_9767163_+_dCP_twist_center144	twist	AGCAACTGAG	144	SREBP	ATCACGCGAC	162	138	122	886	1160	1392	8.11749	5.21569	2.9018	3.36426	-1.85143	4.75323
chrX_9766915_9767163_+_dCP_twist_center144_to_Stat92E	chrX_9766915_9767163	+	TACCACGCGACAACCCATTGAATATTTAACGGCAATTACGGAACGAGAGACGTCACAGATCCAACATATTTACCCTCGTTATCGCACCGCACACCCGCTGAAATTTCCCGAAAATGTGACCGAATAATGGTCTTGCCATTTCCCGGAAATGTTATTATTATAGCGCTGAGTCAGAAGTGTTCCTCGACTCATCGTTATCTCATTGACGCCGGAGTTGTCGGGTCTAGTGCTCTGTGTATAGTATCTTGT	chrX_9766915_9767163_+_dCP_twist_center144	twist	GAGCAACTGAG	144	Stat92E	TTTCCCGGAAA	245	191	212	2289	2414	2966	8.64541	5.21569	3.42972	3.36426	-1.85143	5.28115
chrX_9766915_9767163_+_dCP_twist_center144_to_Atf2	chrX_9766915_9767163	+	TACCACGCGACAACCCATTGAATATTTAACGGCAATTACGGAACGAGAGACGTCACAGATCCAACATATTTACCCTCGTTATCGCACCGCACACCCGCTGAAATTTCCCGAAAATGTGACCGAATAATGGTCTTGCCAATCACGTCATCTGTTATTATTATAGCGCTGAGTCAGAAGTGTTCCTCGACTCATCGTTATCTCATTGACGCCGGAGTTGTCGGGTCTAGTGCTCTGTGTATAGTATCTTGT	chrX_9766915_9767163_+_dCP_twist_center144	twist	GAGCAACTGAG	144	Atf2	ATCACGTCATC	389	310	326	817	852	1057	6.49035	5.21569	1.27465	3.36426	-1.85143	3.12609
chr3L_12259005_12259253_+_dCP_twist_center235_to_GATAA	chr3L_12259005_12259253	+	TTGTTGCTTTGCATGTGTGTTGTGTTTCCCTTGATTTTTTTTTATTGTTTTGTCTTGTTTGTTGCTTCTTTTTATGCTTCTCTCTCTTTGGCAGGAAGAACGAGAAACAAACTCAAAATTCTCTGAATATTTCTTTCATTCGGATTTTTTGTGCTGAGCTGCTGAGCAAAGAAAAAACAACAACAACAAACGCCAACGCGCCTTCTCACACAAGCACAATCAGACTCGCACAGATAAGAACAGTTCAAA	chr3L_12259005_12259253_+_dCP_twist_center235	twist	ACACATGC	235	GATAA	AGATAAGA	40	39	36	56	59	75	5.79247	4.028	1.76448	2.55787	-1.47013	3.23461
chr3L_12259005_12259253_+_dCP_twist_center235_to_AP1	chr3L_12259005_12259253	+	TTGTTGCTTTGCATGTGTGTTGTGTTTCCCTTGATTTTTTTTTATTGTTTTGTCTTGTTTGTTGCTTCTTTTTATGCTTCTCTCTCTTTGGCAGGAAGAACGAGAAACAAACTCAAAATTCTCTGAATATTTCTTTCATTCGGATTTTTTGTGCTGAGCTGCTGAGCAAAGAAAAAACAACAACAACAAACGCCAACGCGCCTTCTCACACAAGCACAATCAGACTCGCAATGAGTCACACAGTTCAAA	chr3L_12259005_12259253_+_dCP_twist_center235	twist	CACACATGC	235	AP1	ATGAGTCAC	62	38	44	76	59	96	5.74456	4.028	1.71656	2.55787	-1.47013	3.18669
chr3L_12259005_12259253_+_dCP_twist_center235_to_Trl	chr3L_12259005_12259253	+	TTGTTGCTTTGCATGTGTGTTGTGTTTCCCTTGATTTTTTTTTATTGTTTTGTCTTGTTTGTTGCTTCTTTTTATGCTTCTCTCTCTTTGGCAGGAAGAACGAGAAACAAACTCAAAATTCTCTGAATATTTCTTTCATTCGGATTTTTTGTGCTGAGCTGCTGAGCAAAGAAAAAACAACAACAACAAACGCCAACGCGCCTTCTCACACAAGCACAATCAGACTCGCACGAGAGAGCACAGTTCAAA	chr3L_12259005_12259253_+_dCP_twist_center235	twist	ACACATG	235	Trl	GAGAGAG	39	28	30	11	9	24	3.91559	4.028	-0.112404	2.55787	-1.47013	1.35773
chr3L_12259005_12259253_+_dCP_twist_center235_to_ETS	chr3L_12259005_12259253	+	TTGTTGCTTTGCATGTGTGTTGTGTTTCCCTTGATTTTTTTTTATTGTTTTGTCTTGTTTGTTGCTTCTTTTTATGCTTCTCTCTCTTTGGCAGGAAGAACGAGAAACAAACTCAAAATTCTCTGAATATTTCTTTCATTCGGATTTTTTGTGCTGAGCTGCTGAGCAAAGAAAAAACAACAACAACAAACGCCAACGCGCCTTCTCACACAAGCACAATCAGACTCGCAACCGGAAGTACAGTTCAAA	chr3L_12259005_12259253_+_dCP_twist_center235	twist	CACACATGC	235	ETS	ACCGGAAGT	53	51	55	28	24	40	4.26553	4.028	0.23753	2.55787	-1.47013	1.70766
chr3L_12259005_12259253_+_dCP_twist_center235_to_SREBP	chr3L_12259005_12259253	+	TTGTTGCTTTGCATGTGTGTTGTGTTTCCCTTGATTTTTTTTTATTGTTTTGTCTTGTTTGTTGCTTCTTTTTATGCTTCTCTCTCTTTGGCAGGAAGAACGAGAAACAAACTCAAAATTCTCTGAATATTTCTTTCATTCGGATTTTTTGTGCTGAGCTGCTGAGCAAAGAAAAAACAACAACAACAAACGCCAACGCGCCTTCTCACACAAGCACAATCAGACTCGCAATCACGCGACCAGTTCAAA	chr3L_12259005_12259253_+_dCP_twist_center235	twist	CACACATGCA	235	SREBP	ATCACGCGAC	207	194	196	419	444	484	6.25244	4.028	2.22445	2.55787	-1.47013	3.69458
chr3L_12259005_12259253_+_dCP_twist_center235_to_Stat92E	chr3L_12259005_12259253	+	TTGTTGCTTTGCATGTGTGTTGTGTTTCCCTTGATTTTTTTTTATTGTTTTGTCTTGTTTGTTGCTTCTTTTTATGCTTCTCTCTCTTTGGCAGGAAGAACGAGAAACAAACTCAAAATTCTCTGAATATTTCTTTCATTCGGATTTTTTGTGCTGAGCTGCTGAGCAAAGAAAAAACAACAACAACAAACGCCAACGCGCCTTCTCACACAAGCACAATCAGACTCGCTTTCCCGGAAACAGTTCAAA	chr3L_12259005_12259253_+_dCP_twist_center235	twist	ACACACATGCA	235	Stat92E	TTTCCCGGAAA	137	107	124	38	28	44	3.31539	4.028	-0.712607	2.55787	-1.47013	0.757522
chr3L_12259005_12259253_+_dCP_twist_center235_to_Atf2	chr3L_12259005_12259253	+	TTGTTGCTTTGCATGTGTGTTGTGTTTCCCTTGATTTTTTTTTATTGTTTTGTCTTGTTTGTTGCTTCTTTTTATGCTTCTCTCTCTTTGGCAGGAAGAACGAGAAACAAACTCAAAATTCTCTGAATATTTCTTTCATTCGGATTTTTTGTGCTGAGCTGCTGAGCAAAGAAAAAACAACAACAACAAACGCCAACGCGCCTTCTCACACAAGCACAATCAGACTCGCATCACGTCATCCAGTTCAAA	chr3L_12259005_12259253_+_dCP_twist_center235	twist	ACACACATGCA	235	Atf2	ATCACGTCATC	40	40	49	66	77	97	5.96546	4.028	1.93747	2.55787	-1.47013	3.4076
chr3L_21348232_21348480_+_dCP_twist_center229_to_GATAA	chr3L_21348232_21348480	+	CAGACAGGATTATCTAAAGCATAGTCGTCTTCAAATTCGAAATTTAATATGCTCTTTAAGAACTAAGATAAACATTTAACAACAATCGGATGACGCATCGTCCGATGATTCGATGTCGTCATTGGGTGACTCGATTTTGAGTGACTCAATGCCGCAGACGACGCTGTTCCTCGGCTTGTTTATAGTGATAGCCATCGGCACGGAGTTCGTGGGCGGGCTCCGGTTAGATAAGATCTTGGGTCTCCACAT	chr3L_21348232_21348480_+_dCP_twist_center229	twist	CCAGCTGC	229	GATAA	AGATAAGA	234	151	210	94	76	97	3.91152	3.61141	0.300106	2.47546	-1.13595	1.43606
chr3L_21348232_21348480_+_dCP_twist_center229_to_AP1	chr3L_21348232_21348480	+	CAGACAGGATTATCTAAAGCATAGTCGTCTTCAAATTCGAAATTTAATATGCTCTTTAAGAACTAAGATAAACATTTAACAACAATCGGATGACGCATCGTCCGATGATTCGATGTCGTCATTGGGTGACTCGATTTTGAGTGACTCAATGCCGCAGACGACGCTGTTCCTCGGCTTGTTTATAGTGATAGCCATCGGCACGGAGTTCGTGGGCGGGCTCCGGTATGAGTCACTCTTGGGTCTCCACAT	chr3L_21348232_21348480_+_dCP_twist_center229	twist	TCCAGCTGC	229	AP1	ATGAGTCAC	238	196	209	193	170	241	4.9738	3.61141	1.36238	2.47546	-1.13595	2.49833
chr3L_21348232_21348480_+_dCP_twist_center229_to_Trl	chr3L_21348232_21348480	+	CAGACAGGATTATCTAAAGCATAGTCGTCTTCAAATTCGAAATTTAATATGCTCTTTAAGAACTAAGATAAACATTTAACAACAATCGGATGACGCATCGTCCGATGATTCGATGTCGTCATTGGGTGACTCGATTTTGAGTGACTCAATGCCGCAGACGACGCTGTTCCTCGGCTTGTTTATAGTGATAGCCATCGGCACGGAGTTCGTGGGCGGGCTCCGGTTGAGAGAGCTCTTGGGTCTCCACAT	chr3L_21348232_21348480_+_dCP_twist_center229	twist	CCAGCTG	229	Trl	GAGAGAG	207	176	176	100	101	87	4.12432	3.61141	0.512911	2.47546	-1.13595	1.64886
chr3L_21348232_21348480_+_dCP_twist_center229_to_ETS	chr3L_21348232_21348480	+	CAGACAGGATTATCTAAAGCATAGTCGTCTTCAAATTCGAAATTTAATATGCTCTTTAAGAACTAAGATAAACATTTAACAACAATCGGATGACGCATCGTCCGATGATTCGATGTCGTCATTGGGTGACTCGATTTTGAGTGACTCAATGCCGCAGACGACGCTGTTCCTCGGCTTGTTTATAGTGATAGCCATCGGCACGGAGTTCGTGGGCGGGCTCCGGTACCGGAAGTTCTTGGGTCTCCACAT	chr3L_21348232_21348480_+_dCP_twist_center229	twist	TCCAGCTGC	229	ETS	ACCGGAAGT	273	227	214	297	273	361	5.45278	3.61141	1.84137	2.47546	-1.13595	2.97732
chr3L_21348232_21348480_+_dCP_twist_center229_to_SREBP	chr3L_21348232_21348480	+	CAGACAGGATTATCTAAAGCATAGTCGTCTTCAAATTCGAAATTTAATATGCTCTTTAAGAACTAAGATAAACATTTAACAACAATCGGATGACGCATCGTCCGATGATTCGATGTCGTCATTGGGTGACTCGATTTTGAGTGACTCAATGCCGCAGACGACGCTGTTCCTCGGCTTGTTTATAGTGATAGCCATCGGCACGGAGTTCGTGGGCGGGCTCCGGTATCACGCGACCTTGGGTCTCCACAT	chr3L_21348232_21348480_+_dCP_twist_center229	twist	TCCAGCTGCT	229	SREBP	ATCACGCGAC	264	193	224	116	105	123	4.08689	3.61141	0.475481	2.47546	-1.13595	1.61143
chr3L_21348232_21348480_+_dCP_twist_center229_to_Stat92E	chr3L_21348232_21348480	+	CAGACAGGATTATCTAAAGCATAGTCGTCTTCAAATTCGAAATTTAATATGCTCTTTAAGAACTAAGATAAACATTTAACAACAATCGGATGACGCATCGTCCGATGATTCGATGTCGTCATTGGGTGACTCGATTTTGAGTGACTCAATGCCGCAGACGACGCTGTTCCTCGGCTTGTTTATAGTGATAGCCATCGGCACGGAGTTCGTGGGCGGGCTCCGGTTTCCCGGAAACTTGGGTCTCCACAT	chr3L_21348232_21348480_+_dCP_twist_center229	twist	TTCCAGCTGCT	229	Stat92E	TTTCCCGGAAA	277	283	299	410	405	505	5.68619	3.61141	2.07477	2.47546	-1.13595	3.21072
chr3L_21348232_21348480_+_dCP_twist_center229_to_Atf2	chr3L_21348232_21348480	+	CAGACAGGATTATCTAAAGCATAGTCGTCTTCAAATTCGAAATTTAATATGCTCTTTAAGAACTAAGATAAACATTTAACAACAATCGGATGACGCATCGTCCGATGATTCGATGTCGTCATTGGGTGACTCGATTTTGAGTGACTCAATGCCGCAGACGACGCTGTTCCTCGGCTTGTTTATAGTGATAGCCATCGGCACGGAGTTCGTGGGCGGGCTCCGGATCACGTCATCCTTGGGTCTCCACAT	chr3L_21348232_21348480_+_dCP_twist_center229	twist	TTCCAGCTGCT	229	Atf2	ATCACGTCATC	243	209	192	150	162	195	4.73277	3.61141	1.12136	2.47546	-1.13595	2.25731
chr2R_15350205_15350453_+_dCP_twist_center133_to_GATAA	chr2R_15350205_15350453	-	TATTTTAAGCTGCGTACTCATGCCCTTGATTTCATTCTAAGTGAGCTTAGCTGATCGGATTAGCCAGTGACGTTGTTCTTTATCGCGGATGTTGTAACGCCTGCGATTTGGATTCGGATCACAACGATGAGATAAGAGCTTCAGCTTTTTTGCAATCTCTTCGCCTTACTTCTGTTGTTTTTTTCTTTATTTTTCGCGTTTTGTATTGTTTGACGTAACGCCCTTGTGCTTGTGCGATAATAACTGGTC	chr2R_15350205_15350453_+_dCP_twist_center133	twist	ACAACTGC	133	GATAA	AGATAAGA	312	306	294	245	247	255	4.78734	4.73215	0.0551822	2.78893	-1.94323	1.99841
chr2R_15350205_15350453_+_dCP_twist_center133_to_AP1	chr2R_15350205_15350453	-	TATTTTAAGCTGCGTACTCATGCCCTTGATTTCATTCTAAGTGAGCTTAGCTGATCGGATTAGCCAGTGACGTTGTTCTTTATCGCGGATGTTGTAACGCCTGCGATTTGGATTCGGATCACAACGATATGAGTCACGCTTCAGCTTTTTTGCAATCTCTTCGCCTTACTTCTGTTGTTTTTTTCTTTATTTTTCGCGTTTTGTATTGTTTGACGTAACGCCCTTGTGCTTGTGCGATAATAACTGGTC	chr2R_15350205_15350453_+_dCP_twist_center133	twist	GACAACTGC	133	AP1	ATGAGTCAC	315	265	280	588	599	692	6.20566	4.73215	1.47351	2.78893	-1.94323	3.41673
chr2R_15350205_15350453_+_dCP_twist_center133_to_Trl	chr2R_15350205_15350453	-	TATTTTAAGCTGCGTACTCATGCCCTTGATTTCATTCTAAGTGAGCTTAGCTGATCGGATTAGCCAGTGACGTTGTTCTTTATCGCGGATGTTGTAACGCCTGCGATTTGGATTCGGATCACAACGATGGAGAGAGCGCTTCAGCTTTTTTGCAATCTCTTCGCCTTACTTCTGTTGTTTTTTTCTTTATTTTTCGCGTTTTGTATTGTTTGACGTAACGCCCTTGTGCTTGTGCGATAATAACTGGTC	chr2R_15350205_15350453_+_dCP_twist_center133	twist	ACAACTG	133	Trl	GAGAGAG	451	405	388	214	150	218	3.95766	4.73215	-0.774498	2.78893	-1.94323	1.16873
chr2R_15350205_15350453_+_dCP_twist_center133_to_ETS	chr2R_15350205_15350453	-	TATTTTAAGCTGCGTACTCATGCCCTTGATTTCATTCTAAGTGAGCTTAGCTGATCGGATTAGCCAGTGACGTTGTTCTTTATCGCGGATGTTGTAACGCCTGCGATTTGGATTCGGATCACAACGATACCGGAAGTGCTTCAGCTTTTTTGCAATCTCTTCGCCTTACTTCTGTTGTTTTTTTCTTTATTTTTCGCGTTTTGTATTGTTTGACGTAACGCCCTTGTGCTTGTGCGATAATAACTGGTC	chr2R_15350205_15350453_+_dCP_twist_center133	twist	GACAACTGC	133	ETS	ACCGGAAGT	662	550	604	2621	2294	2653	7.13036	4.73215	2.39821	2.78893	-1.94323	4.34144
[truncated: 5,273 more rows]
