# Supplementary material for: Enhancers display constrained sequence flexibility and context-specific modulation of motif function
Source: HighWire-hosted journal article supplement (doi:10.1101/gr.277246.122), 2023-03-01
Supplement: Supplemental_Table_S6.xlsx [file Supplemental_Table_S6.xlsx]

## Sheet: Legend
Supplemental Table S6. Results of motif-pasting experiment in human HCT-116 enhancers.
Table with all oligos used in the analysis of human motif pasting with their DNA sequence, wild-type motif information, pasted motif information, activity of respective enhancer variant, of the original wild type or motif-mutant enhancer, and respective log2 fold- changes.

## Sheet: Supplemental Table S6
Oligo_ID	Sequence_ID	Sequence	Strand	Instance_ID	Wt_motif	Wt_motif_sequence	Motif_center	New_motif	New_motif_sequence	input_rep1_UMI	input_rep2_UMI	input_rep3_UMI	STARRseq_rep1_UMI	STARRseq_rep2_UMI	STARRseq_rep3_UMI	Activity	wt_activity	log2FC_wt_pasted	motif_mut_activity	log2FC_wt_mut	log2FC_mut_pasted
chr1_103345217_103345465_MAFK_MA0496.2_center122_to_CREB1_MA0018.3	chr1_103345217_103345465	ACTTAGATGTTGAAGGAAATTCCATCAATATGGTGCAAATGACATTCCTGAAACTTCTGACTGCCTCTGCTCGGCAAAATTTCACCTACCACTGTCATCAGTCAGCAGCCTGGTATGATGACGTCACAGGAAGTTATGACAAAGCACTTCGCTTCCTGGGATCAAATGATGAGGAGATGTCCTATGACAATAATCCTTTTATCAAAACACTGTATGATGGTTGTGCGGTGAGTATAAGTTCTGCTTGTC	-	chr1_103345217_103345465_MAFK_MA0496.2_center122	MAF	TGTGTCAT	122	CREB1	TGACGTCA	250	237	200	626	607	461	3.29683	3.29485	0.00198561	0.263467	-3.03138	3.03336
chr1_103345217_103345465_MAFK_MA0496.2_center122_to_E2F1_HUMAN.H11MO.0.A	chr1_103345217_103345465	ACTTAGATGTTGAAGGAAATTCCATCAATATGGTGCAAATGACATTCCTGAAACTTCTGACTGCCTCTGCTCGGCAAAATTTCACCTACCACTGTCATCAGTCAGCAGCCTGGTATGAGGCGGGAACAGGAAGTTATGACAAAGCACTTCGCTTCCTGGGATCAAATGATGAGGAGATGTCCTATGACAATAATCCTTTTATCAAAACACTGTATGATGGTTGTGCGGTGAGTATAAGTTCTGCTTGTC	-	chr1_103345217_103345465_MAFK_MA0496.2_center122	MAF	TGTGTCAT	122	E2F1	GGCGGGAA	180	140	164	249	200	174	2.34123	3.29485	-0.953619	0.263467	-3.03138	2.07776
chr1_103345217_103345465_MAFK_MA0496.2_center122_to_EGR1_C2H2_1	chr1_103345217_103345465	ACTTAGATGTTGAAGGAAATTCCATCAATATGGTGCAAATGACATTCCTGAAACTTCTGACTGCCTCTGCTCGGCAAAATTTCACCTACCACTGTCATCAGTCAGCAGCCTGGTATACGCCCACGCAAGGAAGTTATGACAAAGCACTTCGCTTCCTGGGATCAAATGATGAGGAGATGTCCTATGACAATAATCCTTTTATCAAAACACTGTATGATGGTTGTGCGGTGAGTATAAGTTCTGCTTGTC	-	chr1_103345217_103345465_MAFK_MA0496.2_center122	MAF	GATGTGTCATC	122	EGR1	ACGCCCACGCA	184	216	230	181	187	166	1.73025	3.29485	-1.56459	0.263467	-3.03138	1.46679
chr1_103345217_103345465_MAFK_MA0496.2_center122_to_ETS1_HUMAN.H11MO.0.A	chr1_103345217_103345465	ACTTAGATGTTGAAGGAAATTCCATCAATATGGTGCAAATGACATTCCTGAAACTTCTGACTGCCTCTGCTCGGCAAAATTTCACCTACCACTGTCATCAGTCAGCAGCCTGGTATGACCGGAAGTCAGGAAGTTATGACAAAGCACTTCGCTTCCTGGGATCAAATGATGAGGAGATGTCCTATGACAATAATCCTTTTATCAAAACACTGTATGATGGTTGTGCGGTGAGTATAAGTTCTGCTTGTC	-	chr1_103345217_103345465_MAFK_MA0496.2_center122	MAF	ATGTGTCAT	122	ETS	ACCGGAAGT	227	236	261	259	195	274	1.91921	3.29485	-1.37563	0.263467	-3.03138	1.65575
chr1_103345217_103345465_MAFK_MA0496.2_center122_to_MECP2_HUMAN.H11MO.0.C	chr1_103345217_103345465	ACTTAGATGTTGAAGGAAATTCCATCAATATGGTGCAAATGACATTCCTGAAACTTCTGACTGCCTCTGCTCGGCAAAATTTCACCTACCACTGTCATCAGTCAGCAGCCTGGTATGACCCGGAGTCAGGAAGTTATGACAAAGCACTTCGCTTCCTGGGATCAAATGATGAGGAGATGTCCTATGACAATAATCCTTTTATCAAAACACTGTATGATGGTTGTGCGGTGAGTATAAGTTCTGCTTGTC	-	chr1_103345217_103345465_MAFK_MA0496.2_center122	MAF	TGTGTCA	122	MECP2	CCCGGAG	135	138	151	71	70	105	1.09195	3.29485	-2.20289	0.263467	-3.03138	0.828488
chr1_103345217_103345465_MAFK_MA0496.2_center122_to_TP53_MA0106.3	chr1_103345217_103345465	ACTTAGATGTTGAAGGAAATTCCATCAATATGGTGCAAATGACATTCCTGAAACTTCTGACTGCCTCTGCTCGGCAAAATTTCACCTACCACTGTCATCAGTCAGCAGCCTGGTACATGCCCGGGCATGTAAGTTATGACAAAGCACTTCGCTTCCTGGGATCAAATGATGAGGAGATGTCCTATGACAATAATCCTTTTATCAAAACACTGTATGATGGTTGTGCGGTGAGTATAAGTTCTGCTTGTC	-	chr1_103345217_103345465_MAFK_MA0496.2_center122	MAF	ATGATGTGTCATCAGG	122	P53	ACATGCCCGGGCATGT	141	132	164	573	436	698	3.85588	3.29485	0.561039	0.263467	-3.03138	3.59242
chr1_103345217_103345465_MAFK_MA0496.2_center140_to_CREB1_MA0018.3	chr1_103345217_103345465	ACTTAGATGTTGAAGGAAATTCCATCAATATGGTGCAAATGACATTCCTGAAACTTCTGACTGCCTCTGCTCGGCAAAATTTCACCTACCACTGTCATCAGTCAGCAGCCTGGTATGATGTGTCATCAGGAAGTTATGACGTCACACTTCGCTTCCTGGGATCAAATGATGAGGAGATGTCCTATGACAATAATCCTTTTATCAAAACACTGTATGATGGTTGTGCGGTGAGTATAAGTTCTGCTTGTC	-	chr1_103345217_103345465_MAFK_MA0496.2_center140	MAF	TGACAAAG	140	CREB1	TGACGTCA	365	425	393	586	503	366	2.30741	3.29485	-0.98743	0.72673	-2.56811	1.58068
chr1_103345217_103345465_MAFK_MA0496.2_center140_to_E2F1_HUMAN.H11MO.0.A	chr1_103345217_103345465	ACTTAGATGTTGAAGGAAATTCCATCAATATGGTGCAAATGACATTCCTGAAACTTCTGACTGCCTCTGCTCGGCAAAATTTCACCTACCACTGTCATCAGTCAGCAGCCTGGTATGATGTGTCATCAGGAAGTTAGGCGGGAACACTTCGCTTCCTGGGATCAAATGATGAGGAGATGTCCTATGACAATAATCCTTTTATCAAAACACTGTATGATGGTTGTGCGGTGAGTATAAGTTCTGCTTGTC	-	chr1_103345217_103345465_MAFK_MA0496.2_center140	MAF	TGACAAAG	140	E2F1	GGCGGGAA	234	227	237	156	147	193	1.41216	3.29485	-1.88269	0.72673	-2.56811	0.685427
chr1_103345217_103345465_MAFK_MA0496.2_center140_to_EGR1_C2H2_1	chr1_103345217_103345465	ACTTAGATGTTGAAGGAAATTCCATCAATATGGTGCAAATGACATTCCTGAAACTTCTGACTGCCTCTGCTCGGCAAAATTTCACCTACCACTGTCATCAGTCAGCAGCCTGGTATGATGTGTCATCAGGAAGTACGCCCACGCAACTTCGCTTCCTGGGATCAAATGATGAGGAGATGTCCTATGACAATAATCCTTTTATCAAAACACTGTATGATGGTTGTGCGGTGAGTATAAGTTCTGCTTGTC	-	chr1_103345217_103345465_MAFK_MA0496.2_center140	MAF	TATGACAAAGC	140	EGR1	ACGCCCACGCA	323	356	356	1594	1507	1186	4.04728	3.29485	0.752437	0.72673	-2.56811	3.32055
chr1_103345217_103345465_MAFK_MA0496.2_center140_to_ETS1_HUMAN.H11MO.0.A	chr1_103345217_103345465	ACTTAGATGTTGAAGGAAATTCCATCAATATGGTGCAAATGACATTCCTGAAACTTCTGACTGCCTCTGCTCGGCAAAATTTCACCTACCACTGTCATCAGTCAGCAGCCTGGTATGATGTGTCATCAGGAAGTTACCGGAAGTCACTTCGCTTCCTGGGATCAAATGATGAGGAGATGTCCTATGACAATAATCCTTTTATCAAAACACTGTATGATGGTTGTGCGGTGAGTATAAGTTCTGCTTGTC	-	chr1_103345217_103345465_MAFK_MA0496.2_center140	MAF	ATGACAAAG	140	ETS	ACCGGAAGT	250	244	231	254	217	225	1.8915	3.29485	-1.40335	0.72673	-2.56811	1.16476
chr1_103345217_103345465_MAFK_MA0496.2_center140_to_MECP2_HUMAN.H11MO.0.C	chr1_103345217_103345465	ACTTAGATGTTGAAGGAAATTCCATCAATATGGTGCAAATGACATTCCTGAAACTTCTGACTGCCTCTGCTCGGCAAAATTTCACCTACCACTGTCATCAGTCAGCAGCCTGGTATGATGTGTCATCAGGAAGTTACCCGGAGGCACTTCGCTTCCTGGGATCAAATGATGAGGAGATGTCCTATGACAATAATCCTTTTATCAAAACACTGTATGATGGTTGTGCGGTGAGTATAAGTTCTGCTTGTC	-	chr1_103345217_103345465_MAFK_MA0496.2_center140	MAF	TGACAAA	140	MECP2	CCCGGAG	258	301	300	253	196	213	1.5757	3.29485	-1.71914	0.72673	-2.56811	0.848974
chr1_103345217_103345465_MAFK_MA0496.2_center140_to_TP53_MA0106.3	chr1_103345217_103345465	ACTTAGATGTTGAAGGAAATTCCATCAATATGGTGCAAATGACATTCCTGAAACTTCTGACTGCCTCTGCTCGGCAAAATTTCACCTACCACTGTCATCAGTCAGCAGCCTGGTATGATGTGTCATCAGGAAACATGCCCGGGCATGTTCGCTTCCTGGGATCAAATGATGAGGAGATGTCCTATGACAATAATCCTTTTATCAAAACACTGTATGATGGTTGTGCGGTGAGTATAAGTTCTGCTTGTC	-	chr1_103345217_103345465_MAFK_MA0496.2_center140	MAF	GTTATGACAAAGCACT	140	P53	ACATGCCCGGGCATGT	371	401	367	1474	1177	1914	3.88709	3.29485	0.592249	0.72673	-2.56811	3.16036
chr1_110171137_110171385_CREB1_MA0018.3_center137_to_E2F1_HUMAN.H11MO.0.A	chr1_110171137_110171385	TGCCAAGCCTCGAGCCTGAGGATCTGGGGGCTTTTAGGGGGTGAGACTCAAGGAGGGTAGGCAGATGACCCCCTGAAGAGCTCTGACTCAGCTCACCTCATGTCTGACTCAGCTCACCTCATGTCTAGGAGGTGGCGGGAAACCTGGAGGAGAGCAAATACCAGAATGCAGAGCTGCGGCTCTCCATTTACGGGCGCTCGAGGGATGAGTGGGACAAGCTGGCGCGCTGGGCCGTCATGCACCGCGTGC	+	chr1_110171137_110171385_CREB1_MA0018.3_center137	CREB1	GATGTCAG	137	E2F1	GGCGGGAA	537	529	523	90	95	175	-0.300361	2.47094	-2.7713	-0.140804	-2.61174	-0.159558
chr1_110171137_110171385_CREB1_MA0018.3_center137_to_EGR1_C2H2_1	chr1_110171137_110171385	TGCCAAGCCTCGAGCCTGAGGATCTGGGGGCTTTTAGGGGGTGAGACTCAAGGAGGGTAGGCAGATGACCCCCTGAAGAGCTCTGACTCAGCTCACCTCATGTCTGACTCAGCTCACCTCATGTCTAGGAGACGCCCACGCACCTGGAGGAGAGCAAATACCAGAATGCAGAGCTGCGGCTCTCCATTTACGGGCGCTCGAGGGATGAGTGGGACAAGCTGGCGCGCTGGGCCGTCATGCACCGCGTGC	+	chr1_110171137_110171385_CREB1_MA0018.3_center137	CREB1	GTGATGTCAGA	137	EGR1	ACGCCCACGCA	253	247	243	158	158	154	1.28903	2.47094	-1.18191	-0.140804	-2.61174	1.42983
chr1_110171137_110171385_CREB1_MA0018.3_center137_to_ETS1_HUMAN.H11MO.0.A	chr1_110171137_110171385	TGCCAAGCCTCGAGCCTGAGGATCTGGGGGCTTTTAGGGGGTGAGACTCAAGGAGGGTAGGCAGATGACCCCCTGAAGAGCTCTGACTCAGCTCACCTCATGTCTGACTCAGCTCACCTCATGTCTAGGAGGACCGGAAGTACCTGGAGGAGAGCAAATACCAGAATGCAGAGCTGCGGCTCTCCATTTACGGGCGCTCGAGGGATGAGTGGGACAAGCTGGCGCGCTGGGCCGTCATGCACCGCGTGC	+	chr1_110171137_110171385_CREB1_MA0018.3_center137	CREB1	TGATGTCAG	137	ETS	ACCGGAAGT	343	414	407	302	283	249	1.49638	2.47094	-0.97456	-0.140804	-2.61174	1.63718
chr1_110171137_110171385_CREB1_MA0018.3_center137_to_FOSL1_MA0477.1	chr1_110171137_110171385	TGCCAAGCCTCGAGCCTGAGGATCTGGGGGCTTTTAGGGGGTGAGACTCAAGGAGGGTAGGCAGATGACCCCCTGAAGAGCTCTGACTCAGCTCACCTCATGTCTGACTCAGCTCACCTCATGTCTAGGAGGGTGACTCATACCTGGAGGAGAGCAAATACCAGAATGCAGAGCTGCGGCTCTCCATTTACGGGCGCTCGAGGGATGAGTGGGACAAGCTGGCGCGCTGGGCCGTCATGCACCGCGTGC	+	chr1_110171137_110171385_CREB1_MA0018.3_center137	CREB1	TGATGTCAG	137	AP-1	GTGACTCAT	214	226	225	298	281	216	2.25178	2.47094	-0.219157	-0.140804	-2.61174	2.39258
chr1_110171137_110171385_CREB1_MA0018.3_center137_to_MAFK_MA0496.2	chr1_110171137_110171385	TGCCAAGCCTCGAGCCTGAGGATCTGGGGGCTTTTAGGGGGTGAGACTCAAGGAGGGTAGGCAGATGACCCCCTGAAGAGCTCTGACTCAGCTCACCTCATGTCTGACTCAGCTCACCTCATGTCTAGGATGCTGAGTCAGCACTGGAGGAGAGCAAATACCAGAATGCAGAGCTGCGGCTCTCCATTTACGGGCGCTCGAGGGATGAGTGGGACAAGCTGGCGCGCTGGGCCGTCATGCACCGCGTGC	+	chr1_110171137_110171385_CREB1_MA0018.3_center137	CREB1	GGTGATGTCAGAC	137	MAF	TGCTGAGTCAGCA	365	423	405	328	279	234	1.48279	2.47094	-0.988147	-0.140804	-2.61174	1.62359
chr1_110171137_110171385_CREB1_MA0018.3_center137_to_MECP2_HUMAN.H11MO.0.C	chr1_110171137_110171385	TGCCAAGCCTCGAGCCTGAGGATCTGGGGGCTTTTAGGGGGTGAGACTCAAGGAGGGTAGGCAGATGACCCCCTGAAGAGCTCTGACTCAGCTCACCTCATGTCTGACTCAGCTCACCTCATGTCTAGGAGGTCCCGGAGGACCTGGAGGAGAGCAAATACCAGAATGCAGAGCTGCGGCTCTCCATTTACGGGCGCTCGAGGGATGAGTGGGACAAGCTGGCGCGCTGGGCCGTCATGCACCGCGTGC	+	chr1_110171137_110171385_CREB1_MA0018.3_center137	CREB1	GATGTCA	137	MECP2	CCCGGAG	351	360	366	64	60	105	-0.376898	2.47094	-2.84784	-0.140804	-2.61174	-0.236095
chr1_110171137_110171385_CREB1_MA0018.3_center137_to_TP53_MA0106.3	chr1_110171137_110171385	TGCCAAGCCTCGAGCCTGAGGATCTGGGGGCTTTTAGGGGGTGAGACTCAAGGAGGGTAGGCAGATGACCCCCTGAAGAGCTCTGACTCAGCTCACCTCATGTCTGACTCAGCTCACCTCATGTCTAGGACATGCCCGGGCATGTGGAGGAGAGCAAATACCAGAATGCAGAGCTGCGGCTCTCCATTTACGGGCGCTCGAGGGATGAGTGGGACAAGCTGGCGCGCTGGGCCGTCATGCACCGCGTGC	+	chr1_110171137_110171385_CREB1_MA0018.3_center137	CREB1	AGGTGATGTCAGACCT	137	P53	ACATGCCCGGGCATGT	470	488	487	1347	1145	1702	3.43389	2.47094	0.962951	-0.140804	-2.61174	3.57469
chr1_111757143_111757391_TP53_MA0106.3_center122_to_E2F1_HUMAN.H11MO.0.A	chr1_111757143_111757391	AACAAAAGAACAGCCTGAAAAATGAAGCTGCAGGCACAGATAAAGGAATTTGCACAGGGGGGCTTGCCTAAGACATGCCCACAGCCACACAGATAAGAAAGGCTATACAGGTGGCTTGGGCGGGAATGCCCACAACGGACAATTCCATCCCCTGACACATGCACAGTAAGGGGAACAAAGCAATACGGAGTAACTCAAGCTAAGGGCCCACATGTGCATTAGAAGAACAAGGTAGAGCTACCAGAAATT	-	chr1_111757143_111757391_TP53_MA0106.3_center122	P53	CCCAGACA	122	E2F1	GGCGGGAA	14	17	19	20	11	25	2.01688	4.17585	-2.15896	1.20527	-2.97058	0.811613
chr1_111757143_111757391_TP53_MA0106.3_center122_to_EGR1_C2H2_1	chr1_111757143_111757391	AACAAAAGAACAGCCTGAAAAATGAAGCTGCAGGCACAGATAAAGGAATTTGCACAGGGGGGCTTGCCTAAGACATGCCCACAGCCACACAGATAAGAAAGGCTATACAGGTGGCTACGCCCACGCAGCCCACAACGGACAATTCCATCCCCTGACACATGCACAGTAAGGGGAACAAAGCAATACGGAGTAACTCAAGCTAAGGGCCCACATGTGCATTAGAAGAACAAGGTAGAGCTACCAGAAATT	-	chr1_111757143_111757391_TP53_MA0106.3_center122	P53	TGCCCAGACAT	122	EGR1	ACGCCCACGCA	27	38	32	41	44	67	2.51731	4.17585	-1.65853	1.20527	-2.97058	1.31204
chr1_111757143_111757391_TP53_MA0106.3_center122_to_ETS1_HUMAN.H11MO.0.A	chr1_111757143_111757391	AACAAAAGAACAGCCTGAAAAATGAAGCTGCAGGCACAGATAAAGGAATTTGCACAGGGGGGCTTGCCTAAGACATGCCCACAGCCACACAGATAAGAAAGGCTATACAGGTGGCTTACCGGAAGTTGCCCACAACGGACAATTCCATCCCCTGACACATGCACAGTAAGGGGAACAAAGCAATACGGAGTAACTCAAGCTAAGGGCCCACATGTGCATTAGAAGAACAAGGTAGAGCTACCAGAAATT	-	chr1_111757143_111757391_TP53_MA0106.3_center122	P53	GCCCAGACA	122	ETS	ACCGGAAGT	43	36	38	47	38	75	2.29775	4.17585	-1.87809	1.20527	-2.97058	1.09248
chr1_111757143_111757391_TP53_MA0106.3_center122_to_FOSL1_MA0477.1	chr1_111757143_111757391	AACAAAAGAACAGCCTGAAAAATGAAGCTGCAGGCACAGATAAAGGAATTTGCACAGGGGGGCTTGCCTAAGACATGCCCACAGCCACACAGATAAGAAAGGCTATACAGGTGGCTTGTGACTCATTGCCCACAACGGACAATTCCATCCCCTGACACATGCACAGTAAGGGGAACAAAGCAATACGGAGTAACTCAAGCTAAGGGCCCACATGTGCATTAGAAGAACAAGGTAGAGCTACCAGAAATT	-	chr1_111757143_111757391_TP53_MA0106.3_center122	P53	GCCCAGACA	122	AP-1	GTGACTCAT	21	29	24	31	41	51	2.617	4.17585	-1.55885	1.20527	-2.97058	1.41173
chr1_111757143_111757391_TP53_MA0106.3_center122_to_MAFK_MA0496.2	chr1_111757143_111757391	AACAAAAGAACAGCCTGAAAAATGAAGCTGCAGGCACAGATAAAGGAATTTGCACAGGGGGGCTTGCCTAAGACATGCCCACAGCCACACAGATAAGAAAGGCTATACAGGTGGCTGCTGAGTCAGCACCCACAACGGACAATTCCATCCCCTGACACATGCACAGTAAGGGGAACAAAGCAATACGGAGTAACTCAAGCTAAGGGCCCACATGTGCATTAGAAGAACAAGGTAGAGCTACCAGAAATT	-	chr1_111757143_111757391_TP53_MA0106.3_center122	P53	TTGCCCAGACATG	122	MAF	TGCTGAGTCAGCA	78	53	65	89	74	98	2.31482	4.17585	-1.86102	1.20527	-2.97058	1.10955
chr1_112794426_112794674_FOSL1_MA0477.1_center128_to_CREB1_MA0018.3	chr1_112794426_112794674	TCCAGATGTTGGTGAGCCAAGATACCCCCCGATGTGTTCTTTGAACTGGATCCCAGCCAGGGTTGGGGAAGAGGCAGGGTTGCCCTGTGCAGGGCTAGGGTGGAGCAACATATCTGCAAGATGATGACGTCAGCTCCTGGACGCTGGCTTACCAATCCTTTGAGAATGTCTGAAGACAGAGGGTTCTTGTTTGGCACTATATATACGTTGGCTATGGAAATGGGTGGAGGAGGTCACAGCCTGGCCCAT	-	chr1_112794426_112794674_FOSL1_MA0477.1_center128	AP-1	TGAATCAT	128	CREB1	TGACGTCA	171	179	184	135	139	149	1.59746	3.17118	-1.57372	0.415679	-2.7555	1.18178
chr1_112794426_112794674_FOSL1_MA0477.1_center128_to_E2F1_HUMAN.H11MO.0.A	chr1_112794426_112794674	TCCAGATGTTGGTGAGCCAAGATACCCCCCGATGTGTTCTTTGAACTGGATCCCAGCCAGGGTTGGGGAAGAGGCAGGGTTGCCCTGTGCAGGGCTAGGGTGGAGCAACATATCTGCAAGATGAGGCGGGAAGCTCCTGGACGCTGGCTTACCAATCCTTTGAGAATGTCTGAAGACAGAGGGTTCTTGTTTGGCACTATATATACGTTGGCTATGGAAATGGGTGGAGGAGGTCACAGCCTGGCCCAT	-	chr1_112794426_112794674_FOSL1_MA0477.1_center128	AP-1	TGAATCAT	128	E2F1	GGCGGGAA	165	155	149	66	52	113	0.811869	3.17118	-2.35931	0.415679	-2.7555	0.39619
chr1_112794426_112794674_FOSL1_MA0477.1_center128_to_EGR1_C2H2_1	chr1_112794426_112794674	TCCAGATGTTGGTGAGCCAAGATACCCCCCGATGTGTTCTTTGAACTGGATCCCAGCCAGGGTTGGGGAAGAGGCAGGGTTGCCCTGTGCAGGGCTAGGGTGGAGCAACATATCTGCAAGATACGCCCACGCACTCCTGGACGCTGGCTTACCAATCCTTTGAGAATGTCTGAAGACAGAGGGTTCTTGTTTGGCACTATATATACGTTGGCTATGGAAATGGGTGGAGGAGGTCACAGCCTGGCCCAT	-	chr1_112794426_112794674_FOSL1_MA0477.1_center128	AP-1	GATGAATCATG	128	EGR1	ACGCCCACGCA	205	187	216	168	145	215	1.6868	3.17118	-1.48438	0.415679	-2.7555	1.27112
chr1_112794426_112794674_FOSL1_MA0477.1_center128_to_ETS1_HUMAN.H11MO.0.A	chr1_112794426_112794674	TCCAGATGTTGGTGAGCCAAGATACCCCCCGATGTGTTCTTTGAACTGGATCCCAGCCAGGGTTGGGGAAGAGGCAGGGTTGCCCTGTGCAGGGCTAGGGTGGAGCAACATATCTGCAAGATGACCGGAAGTGCTCCTGGACGCTGGCTTACCAATCCTTTGAGAATGTCTGAAGACAGAGGGTTCTTGTTTGGCACTATATATACGTTGGCTATGGAAATGGGTGGAGGAGGTCACAGCCTGGCCCAT	-	chr1_112794426_112794674_FOSL1_MA0477.1_center128	AP-1	ATGAATCAT	128	ETS	ACCGGAAGT	252	251	275	161	138	218	1.29141	3.17118	-1.87976	0.415679	-2.7555	0.875736
chr1_112794426_112794674_FOSL1_MA0477.1_center128_to_MECP2_HUMAN.H11MO.0.C	chr1_112794426_112794674	TCCAGATGTTGGTGAGCCAAGATACCCCCCGATGTGTTCTTTGAACTGGATCCCAGCCAGGGTTGGGGAAGAGGCAGGGTTGCCCTGTGCAGGGCTAGGGTGGAGCAACATATCTGCAAGATGACCCGGAGTGCTCCTGGACGCTGGCTTACCAATCCTTTGAGAATGTCTGAAGACAGAGGGTTCTTGTTTGGCACTATATATACGTTGGCTATGGAAATGGGTGGAGGAGGTCACAGCCTGGCCCAT	-	chr1_112794426_112794674_FOSL1_MA0477.1_center128	AP-1	TGAATCA	128	MECP2	CCCGGAG	118	112	109	45	37	60	0.613623	3.17118	-2.55755	0.415679	-2.7555	0.197944
chr1_112794426_112794674_FOSL1_MA0477.1_center128_to_TP53_MA0106.3	chr1_112794426_112794674	TCCAGATGTTGGTGAGCCAAGATACCCCCCGATGTGTTCTTTGAACTGGATCCCAGCCAGGGTTGGGGAAGAGGCAGGGTTGCCCTGTGCAGGGCTAGGGTGGAGCAACATATCTGCAAGACATGCCCGGGCATGTCTGGACGCTGGCTTACCAATCCTTTGAGAATGTCTGAAGACAGAGGGTTCTTGTTTGGCACTATATATACGTTGGCTATGGAAATGGGTGGAGGAGGTCACAGCCTGGCCCAT	-	chr1_112794426_112794674_FOSL1_MA0477.1_center128	AP-1	ATGATGAATCATGCTC	128	P53	ACATGCCCGGGCATGT	80	82	95	468	369	645	4.40016	3.17118	1.22899	0.415679	-2.7555	3.98449
chr1_115722180_115722428_MAFK_MA0496.2_center124_to_CREB1_MA0018.3	chr1_115722180_115722428	GTCCACTGAGTGTGCGGTGTAGATAAAGACACCCACGAGCGCACTCCACAGCCCTCACCCAGGAGAGCAGGCCCACTGGGGCCAGGCGGTGACTCAGAATGCAGCCACGTAGATAACCGCTGACGTCATTATAAATTCCTTAGCTCCCTCCGCAGGCCTGGGTTTGAGGGACAGGTGACTCACAGACTGACCCTCTCTTTGGTCTGGTTTTTCAGAGGGTTATCTTTAGATCTCCAGGTCATCCCAACC	+	chr1_115722180_115722428_MAFK_MA0496.2_center124	MAF	TGACTCAG	124	CREB1	TGACGTCA	201	207	212	555	523	383	3.24049	2.14533	1.09516	0.270758	-1.87457	2.96973
chr1_115722180_115722428_MAFK_MA0496.2_center124_to_E2F1_HUMAN.H11MO.0.A	chr1_115722180_115722428	GTCCACTGAGTGTGCGGTGTAGATAAAGACACCCACGAGCGCACTCCACAGCCCTCACCCAGGAGAGCAGGCCCACTGGGGCCAGGCGGTGACTCAGAATGCAGCCACGTAGATAACCGCGGCGGGAATTATAAATTCCTTAGCTCCCTCCGCAGGCCTGGGTTTGAGGGACAGGTGACTCACAGACTGACCCTCTCTTTGGTCTGGTTTTTCAGAGGGTTATCTTTAGATCTCCAGGTCATCCCAACC	+	chr1_115722180_115722428_MAFK_MA0496.2_center124	MAF	TGACTCAG	124	E2F1	GGCGGGAA	196	214	170	32	35	55	-0.388962	2.14533	-2.53429	0.270758	-1.87457	-0.65972
chr1_115722180_115722428_MAFK_MA0496.2_center124_to_EGR1_C2H2_1	chr1_115722180_115722428	GTCCACTGAGTGTGCGGTGTAGATAAAGACACCCACGAGCGCACTCCACAGCCCTCACCCAGGAGAGCAGGCCCACTGGGGCCAGGCGGTGACTCAGAATGCAGCCACGTAGATAACCACGCCCACGCATATAAATTCCTTAGCTCCCTCCGCAGGCCTGGGTTTGAGGGACAGGTGACTCACAGACTGACCCTCTCTTTGGTCTGGTTTTTCAGAGGGTTATCTTTAGATCTCCAGGTCATCCCAACC	+	chr1_115722180_115722428_MAFK_MA0496.2_center124	MAF	GCTGACTCAGT	124	EGR1	ACGCCCACGCA	657	737	709	502	514	485	1.47755	2.14533	-0.667778	0.270758	-1.87457	1.20679
chr1_115722180_115722428_MAFK_MA0496.2_center124_to_ETS1_HUMAN.H11MO.0.A	chr1_115722180_115722428	GTCCACTGAGTGTGCGGTGTAGATAAAGACACCCACGAGCGCACTCCACAGCCCTCACCCAGGAGAGCAGGCCCACTGGGGCCAGGCGGTGACTCAGAATGCAGCCACGTAGATAACCGACCGGAAGTTTATAAATTCCTTAGCTCCCTCCGCAGGCCTGGGTTTGAGGGACAGGTGACTCACAGACTGACCCTCTCTTTGGTCTGGTTTTTCAGAGGGTTATCTTTAGATCTCCAGGTCATCCCAACC	+	chr1_115722180_115722428_MAFK_MA0496.2_center124	MAF	CTGACTCAG	124	ETS	ACCGGAAGT	317	349	367	710	617	477	2.80553	2.14533	0.660207	0.270758	-1.87457	2.53478
chr1_115722180_115722428_MAFK_MA0496.2_center124_to_MECP2_HUMAN.H11MO.0.C	chr1_115722180_115722428	GTCCACTGAGTGTGCGGTGTAGATAAAGACACCCACGAGCGCACTCCACAGCCCTCACCCAGGAGAGCAGGCCCACTGGGGCCAGGCGGTGACTCAGAATGCAGCCACGTAGATAACCGCCCCGGAGGTTATAAATTCCTTAGCTCCCTCCGCAGGCCTGGGTTTGAGGGACAGGTGACTCACAGACTGACCCTCTCTTTGGTCTGGTTTTTCAGAGGGTTATCTTTAGATCTCCAGGTCATCCCAACC	+	chr1_115722180_115722428_MAFK_MA0496.2_center124	MAF	TGACTCA	124	MECP2	CCCGGAG	349	320	322	420	347	358	2.13789	2.14533	-0.00743954	0.270758	-1.87457	1.86713
chr1_115722180_115722428_MAFK_MA0496.2_center124_to_TP53_MA0106.3	chr1_115722180_115722428	GTCCACTGAGTGTGCGGTGTAGATAAAGACACCCACGAGCGCACTCCACAGCCCTCACCCAGGAGAGCAGGCCCACTGGGGCCAGGCGGTGACTCAGAATGCAGCCACGTAGATAAACATGCCCGGGCATGTAAATTCCTTAGCTCCCTCCGCAGGCCTGGGTTTGAGGGACAGGTGACTCACAGACTGACCCTCTCTTTGGTCTGGTTTTTCAGAGGGTTATCTTTAGATCTCCAGGTCATCCCAACC	+	chr1_115722180_115722428_MAFK_MA0496.2_center124	MAF	CCGCTGACTCAGTTAT	124	P53	ACATGCCCGGGCATGT	797	755	779	1556	1415	2226	3.03735	2.14533	0.89202	0.270758	-1.87457	2.76659
chr1_115800955_115801203_CREB1_MA0018.3_center202_to_E2F1_HUMAN.H11MO.0.A	chr1_115800955_115801203	AAGTCACAAGATTTGTGACTTTCCCCATTTCTCCTATAGATAACAACACTGTTGTAGAACCTAAGATTGTTTTTTCAGACTTTCACATTCTGGCAACTGACTGACTTCATCCAGACCTGTGACTCATGACTCAACTGCTCCCATGGCCCCCACCCAGAGGGTGACTCAGCACACAAGGACCGTTTTCCACACCCCTATGGCGGGAACCCTAACCAATCAGCAGTACCCATTCTGTAGCCCCCTGCCCAC	+	chr1_115800955_115801203_CREB1_MA0018.3_center202	CREB1	GATTTCAT	202	E2F1	GGCGGGAA	274	331	292	293	295	363	2.00331	3.83378	-1.83047	2.34178	-1.492	-0.338473
chr1_115800955_115801203_CREB1_MA0018.3_center202_to_EGR1_C2H2_1	chr1_115800955_115801203	AAGTCACAAGATTTGTGACTTTCCCCATTTCTCCTATAGATAACAACACTGTTGTAGAACCTAAGATTGTTTTTTCAGACTTTCACATTCTGGCAACTGACTGACTTCATCCAGACCTGTGACTCATGACTCAACTGCTCCCATGGCCCCCACCCAGAGGGTGACTCAGCACACAAGGACCGTTTTCCACACCCCTACGCCCACGCACCTAACCAATCAGCAGTACCCATTCTGTAGCCCCCTGCCCAC	+	chr1_115800955_115801203_CREB1_MA0018.3_center202	CREB1	ATGATTTCATC	202	EGR1	ACGCCCACGCA	343	378	388	951	819	698	3.14223	3.83378	-0.691547	2.34178	-1.492	0.800452
chr1_115800955_115801203_CREB1_MA0018.3_center202_to_ETS1_HUMAN.H11MO.0.A	chr1_115800955_115801203	AAGTCACAAGATTTGTGACTTTCCCCATTTCTCCTATAGATAACAACACTGTTGTAGAACCTAAGATTGTTTTTTCAGACTTTCACATTCTGGCAACTGACTGACTTCATCCAGACCTGTGACTCATGACTCAACTGCTCCCATGGCCCCCACCCAGAGGGTGACTCAGCACACAAGGACCGTTTTCCACACCCCTAACCGGAAGTCCCTAACCAATCAGCAGTACCCATTCTGTAGCCCCCTGCCCAC	+	chr1_115800955_115801203_CREB1_MA0018.3_center202	CREB1	TGATTTCAT	202	ETS	ACCGGAAGT	670	659	637	2130	2151	1559	3.57501	3.83378	-0.25877	2.34178	-1.492	1.23323
chr1_115800955_115801203_CREB1_MA0018.3_center202_to_FOSL1_MA0477.1	chr1_115800955_115801203	AAGTCACAAGATTTGTGACTTTCCCCATTTCTCCTATAGATAACAACACTGTTGTAGAACCTAAGATTGTTTTTTCAGACTTTCACATTCTGGCAACTGACTGACTTCATCCAGACCTGTGACTCATGACTCAACTGCTCCCATGGCCCCCACCCAGAGGGTGACTCAGCACACAAGGACCGTTTTCCACACCCCTAGTGACTCATCCCTAACCAATCAGCAGTACCCATTCTGTAGCCCCCTGCCCAC	+	chr1_115800955_115801203_CREB1_MA0018.3_center202	CREB1	TGATTTCAT	202	AP-1	GTGACTCAT	481	484	462	1827	1808	1476	3.82859	3.83378	-0.00519423	2.34178	-1.492	1.48681
chr1_115800955_115801203_CREB1_MA0018.3_center202_to_MAFK_MA0496.2	chr1_115800955_115801203	AAGTCACAAGATTTGTGACTTTCCCCATTTCTCCTATAGATAACAACACTGTTGTAGAACCTAAGATTGTTTTTTCAGACTTTCACATTCTGGCAACTGACTGACTTCATCCAGACCTGTGACTCATGACTCAACTGCTCCCATGGCCCCCACCCAGAGGGTGACTCAGCACACAAGGACCGTTTTCCACACCCCTGCTGAGTCAGCACTAACCAATCAGCAGTACCCATTCTGTAGCCCCCTGCCCAC	+	chr1_115800955_115801203_CREB1_MA0018.3_center202	CREB1	TATGATTTCATCC	202	MAF	TGCTGAGTCAGCA	413	449	415	1113	1073	751	3.21266	3.83378	-0.621121	2.34178	-1.492	0.870878
chr1_115800955_115801203_CREB1_MA0018.3_center202_to_MECP2_HUMAN.H11MO.0.C	chr1_115800955_115801203	AAGTCACAAGATTTGTGACTTTCCCCATTTCTCCTATAGATAACAACACTGTTGTAGAACCTAAGATTGTTTTTTCAGACTTTCACATTCTGGCAACTGACTGACTTCATCCAGACCTGTGACTCATGACTCAACTGCTCCCATGGCCCCCACCCAGAGGGTGACTCAGCACACAAGGACCGTTTTCCACACCCCTATCCCGGAGTCCCTAACCAATCAGCAGTACCCATTCTGTAGCCCCCTGCCCAC	+	chr1_115800955_115801203_CREB1_MA0018.3_center202	CREB1	GATTTCA	202	MECP2	CCCGGAG	311	322	317	591	575	504	2.79054	3.83378	-1.04324	2.34178	-1.492	0.448762
chr1_115800955_115801203_CREB1_MA0018.3_center202_to_TP53_MA0106.3	chr1_115800955_115801203	AAGTCACAAGATTTGTGACTTTCCCCATTTCTCCTATAGATAACAACACTGTTGTAGAACCTAAGATTGTTTTTTCAGACTTTCACATTCTGGCAACTGACTGACTTCATCCAGACCTGTGACTCATGACTCAACTGCTCCCATGGCCCCCACCCAGAGGGTGACTCAGCACACAAGGACCGTTTTCCACACCCACATGCCCGGGCATGTAACCAATCAGCAGTACCCATTCTGTAGCCCCCTGCCCAC	+	chr1_115800955_115801203_CREB1_MA0018.3_center202	CREB1	CTATGATTTCATCCCT	202	P53	ACATGCCCGGGCATGT	130	127	113	551	471	550	4.02166	3.83378	0.187884	2.34178	-1.492	1.67988
chr1_115800955_115801203_FOSL1_MA0477.1_center165_to_CREB1_MA0018.3	chr1_115800955_115801203	AAGTCACAAGATTTGTGACTTTCCCCATTTCTCCTATAGATAACAACACTGTTGTAGAACCTAAGATTGTTTTTTCAGACTTTCACATTCTGGCAACTGACTGACTTCATCCAGACCTGTGACTCATGACTCAACTGCTCCCATGGCCCCCACCCAGAGGGTGACGTCACACACAAGGACCGTTTTCCACACCCCTATGATTTCATCCCTAACCAATCAGCAGTACCCATTCTGTAGCCCCCTGCCCAC	+	chr1_115800955_115801203_FOSL1_MA0477.1_center165	AP-1	TGACTCAG	165	CREB1	TGACGTCA	151	163	128	314	317	242	2.97375	3.83378	-0.860033	0.610741	-3.22304	2.36301
chr1_115800955_115801203_FOSL1_MA0477.1_center165_to_E2F1_HUMAN.H11MO.0.A	chr1_115800955_115801203	AAGTCACAAGATTTGTGACTTTCCCCATTTCTCCTATAGATAACAACACTGTTGTAGAACCTAAGATTGTTTTTTCAGACTTTCACATTCTGGCAACTGACTGACTTCATCCAGACCTGTGACTCATGACTCAACTGCTCCCATGGCCCCCACCCAGAGGGGGCGGGAACACACAAGGACCGTTTTCCACACCCCTATGATTTCATCCCTAACCAATCAGCAGTACCCATTCTGTAGCCCCCTGCCCAC	+	chr1_115800955_115801203_FOSL1_MA0477.1_center165	AP-1	TGACTCAG	165	E2F1	GGCGGGAA	301	353	318	237	233	207	1.44921	3.83378	-2.38457	0.610741	-3.22304	0.838464
chr1_115800955_115801203_FOSL1_MA0477.1_center165_to_EGR1_C2H2_1	chr1_115800955_115801203	AAGTCACAAGATTTGTGACTTTCCCCATTTCTCCTATAGATAACAACACTGTTGTAGAACCTAAGATTGTTTTTTCAGACTTTCACATTCTGGCAACTGACTGACTTCATCCAGACCTGTGACTCATGACTCAACTGCTCCCATGGCCCCCACCCAGAGACGCCCACGCAACACAAGGACCGTTTTCCACACCCCTATGATTTCATCCCTAACCAATCAGCAGTACCCATTCTGTAGCCCCCTGCCCAC	+	chr1_115800955_115801203_FOSL1_MA0477.1_center165	AP-1	GGTGACTCAGC	165	EGR1	ACGCCCACGCA	202	209	219	278	305	261	2.39537	3.83378	-1.43841	0.610741	-3.22304	1.78463
chr1_115800955_115801203_FOSL1_MA0477.1_center165_to_ETS1_HUMAN.H11MO.0.A	chr1_115800955_115801203	AAGTCACAAGATTTGTGACTTTCCCCATTTCTCCTATAGATAACAACACTGTTGTAGAACCTAAGATTGTTTTTTCAGACTTTCACATTCTGGCAACTGACTGACTTCATCCAGACCTGTGACTCATGACTCAACTGCTCCCATGGCCCCCACCCAGAGGACCGGAAGTCACACAAGGACCGTTTTCCACACCCCTATGATTTCATCCCTAACCAATCAGCAGTACCCATTCTGTAGCCCCCTGCCCAC	+	chr1_115800955_115801203_FOSL1_MA0477.1_center165	AP-1	GTGACTCAG	165	ETS	ACCGGAAGT	192	217	214	486	483	404	3.12405	3.83378	-0.709732	0.610741	-3.22304	2.51331
chr1_115800955_115801203_FOSL1_MA0477.1_center165_to_MECP2_HUMAN.H11MO.0.C	chr1_115800955_115801203	AAGTCACAAGATTTGTGACTTTCCCCATTTCTCCTATAGATAACAACACTGTTGTAGAACCTAAGATTGTTTTTTCAGACTTTCACATTCTGGCAACTGACTGACTTCATCCAGACCTGTGACTCATGACTCAACTGCTCCCATGGCCCCCACCCAGAGGGCCCGGAGGCACACAAGGACCGTTTTCCACACCCCTATGATTTCATCCCTAACCAATCAGCAGTACCCATTCTGTAGCCCCCTGCCCAC	+	chr1_115800955_115801203_FOSL1_MA0477.1_center165	AP-1	TGACTCA	165	MECP2	CCCGGAG	196	183	185	117	109	84	1.11815	3.83378	-2.71563	0.610741	-3.22304	0.507412
chr1_115800955_115801203_FOSL1_MA0477.1_center165_to_TP53_MA0106.3	chr1_115800955_115801203	AAGTCACAAGATTTGTGACTTTCCCCATTTCTCCTATAGATAACAACACTGTTGTAGAACCTAAGATTGTTTTTTCAGACTTTCACATTCTGGCAACTGACTGACTTCATCCAGACCTGTGACTCATGACTCAACTGCTCCCATGGCCCCCACCCAGACATGCCCGGGCATGTCAAGGACCGTTTTCCACACCCCTATGATTTCATCCCTAACCAATCAGCAGTACCCATTCTGTAGCCCCCTGCCCAC	+	chr1_115800955_115801203_FOSL1_MA0477.1_center165	AP-1	AGGGTGACTCAGCACA	165	P53	ACATGCCCGGGCATGT	474	455	492	2076	1835	2882	4.14083	3.83378	0.307045	0.610741	-3.22304	3.53008
chr1_117421819_117422067_TP53_MA0106.3_center128_to_E2F1_HUMAN.H11MO.0.A	chr1_117421819_117422067	CTCTTCCTTCTTCTTGTCGCTGAAACATCACACAGTTGGAGCCCGTGTAAAACTAACTCTCCCCTCTCTCCCAGGAGGGCCCACAGGCTTCCTGCCACCGCTTCCTCCTTGTCAGAGGGACAAGGGCGGGAATGTCCGAATGCTCATGCTCATGTGAAGGCAATTCTGCTCCAGCTGAGACCCCTGCAGCACAATGCCGGACTGACAGCCAACCTGGAGAAAATGTTTGGATGCAGGAATGAGGAACAG	-	chr1_117421819_117422067_TP53_MA0106.3_center128	P53	TCCAGACC	128	E2F1	GGCGGGAA	180	191	211	41	44	68	-0.0607737	2.65906	-2.71983	-1.17456	-3.83362	1.11379
chr1_117421819_117422067_TP53_MA0106.3_center128_to_EGR1_C2H2_1	chr1_117421819_117422067	CTCTTCCTTCTTCTTGTCGCTGAAACATCACACAGTTGGAGCCCGTGTAAAACTAACTCTCCCCTCTCTCCCAGGAGGGCCCACAGGCTTCCTGCCACCGCTTCCTCCTTGTCAGAGGGACAACGCCCACGCAGTCCGAATGCTCATGCTCATGTGAAGGCAATTCTGCTCCAGCTGAGACCCCTGCAGCACAATGCCGGACTGACAGCCAACCTGGAGAAAATGTTTGGATGCAGGAATGAGGAACAG	-	chr1_117421819_117422067_TP53_MA0106.3_center128	P53	AGTCCAGACCT	128	EGR1	ACGCCCACGCA	137	144	145	16	15	34	-0.879585	2.65906	-3.53864	-1.17456	-3.83362	0.294976
chr1_117421819_117422067_TP53_MA0106.3_center128_to_ETS1_HUMAN.H11MO.0.A	chr1_117421819_117422067	CTCTTCCTTCTTCTTGTCGCTGAAACATCACACAGTTGGAGCCCGTGTAAAACTAACTCTCCCCTCTCTCCCAGGAGGGCCCACAGGCTTCCTGCCACCGCTTCCTCCTTGTCAGAGGGACAAACCGGAAGTTGTCCGAATGCTCATGCTCATGTGAAGGCAATTCTGCTCCAGCTGAGACCCCTGCAGCACAATGCCGGACTGACAGCCAACCTGGAGAAAATGTTTGGATGCAGGAATGAGGAACAG	-	chr1_117421819_117422067_TP53_MA0106.3_center128	P53	GTCCAGACC	128	ETS	ACCGGAAGT	362	335	357	137	85	174	0.446074	2.65906	-2.21298	-1.17456	-3.83362	1.62063
chr1_117421819_117422067_TP53_MA0106.3_center128_to_FOSL1_MA0477.1	chr1_117421819_117422067	CTCTTCCTTCTTCTTGTCGCTGAAACATCACACAGTTGGAGCCCGTGTAAAACTAACTCTCCCCTCTCTCCCAGGAGGGCCCACAGGCTTCCTGCCACCGCTTCCTCCTTGTCAGAGGGACAAGTGACTCATTGTCCGAATGCTCATGCTCATGTGAAGGCAATTCTGCTCCAGCTGAGACCCCTGCAGCACAATGCCGGACTGACAGCCAACCTGGAGAAAATGTTTGGATGCAGGAATGAGGAACAG	-	chr1_117421819_117422067_TP53_MA0106.3_center128	P53	GTCCAGACC	128	AP-1	GTGACTCAT	538	597	552	105	78	157	-0.460399	2.65906	-3.11946	-1.17456	-3.83362	0.714162
chr1_117421819_117422067_TP53_MA0106.3_center128_to_MAFK_MA0496.2	chr1_117421819_117422067	CTCTTCCTTCTTCTTGTCGCTGAAACATCACACAGTTGGAGCCCGTGTAAAACTAACTCTCCCCTCTCTCCCAGGAGGGCCCACAGGCTTCCTGCCACCGCTTCCTCCTTGTCAGAGGGACTGCTGAGTCAGCATCCGAATGCTCATGCTCATGTGAAGGCAATTCTGCTCCAGCTGAGACCCCTGCAGCACAATGCCGGACTGACAGCCAACCTGGAGAAAATGTTTGGATGCAGGAATGAGGAACAG	-	chr1_117421819_117422067_TP53_MA0106.3_center128	P53	AAGTCCAGACCTG	128	MAF	TGCTGAGTCAGCA	301	344	307	100	91	140	0.355796	2.65906	-2.30326	-1.17456	-3.83362	1.53036
chr1_11999354_11999602_E2F1_HUMAN.H11MO.0.A_center168_to_CREB1_MA0018.3	chr1_11999354_11999602	AGAATGGGACCTCTGGGCACCCCTGGTTTGACTGTGCCACCGGATGCCCCCTCCTCCCCAAGCAGTCCCAGCCCAAGGCGTGGGTGGTCACTGTGTGGCCTGAGTCAAGGCACAGTCATGACACACCCAGTCTGCTCCCTGGGGAGGCGGGAATGAATGAAGCCTGACGTCACTCTCCCCTCCCCCATCCTTCATCCCCACCCCAGGCTTGAACTGAAGCCAGGAACAGGGTCTGGCAGGAGCTTGGGA	-	chr1_11999354_11999602_E2F1_HUMAN.H11MO.0.A_center168	E2F1	CTTCCGCC	168	CREB1	TGACGTCA	206	200	183	1525	1250	1319	4.75217	3.82043	0.93174	2.51241	-1.30803	2.23977
chr1_11999354_11999602_E2F1_HUMAN.H11MO.0.A_center168_to_EGR1_C2H2_1	chr1_11999354_11999602	AGAATGGGACCTCTGGGCACCCCTGGTTTGACTGTGCCACCGGATGCCCCCTCCTCCCCAAGCAGTCCCAGCCCAAGGCGTGGGTGGTCACTGTGTGGCCTGAGTCAAGGCACAGTCATGACACACCCAGTCTGCTCCCTGGGGAGGCGGGAATGAATGAAGACGCCCACGCATCTCCCCTCCCCCATCCTTCATCCCCACCCCAGGCTTGAACTGAAGCCAGGAACAGGGTCTGGCAGGAGCTTGGGA	-	chr1_11999354_11999602_E2F1_HUMAN.H11MO.0.A_center168	E2F1	CCCTTCCGCCC	168	EGR1	ACGCCCACGCA	522	562	570	2428	2005	1986	3.92439	3.82043	0.103951	2.51241	-1.30803	1.41198
chr1_11999354_11999602_E2F1_HUMAN.H11MO.0.A_center168_to_ETS1_HUMAN.H11MO.0.A	chr1_11999354_11999602	AGAATGGGACCTCTGGGCACCCCTGGTTTGACTGTGCCACCGGATGCCCCCTCCTCCCCAAGCAGTCCCAGCCCAAGGCGTGGGTGGTCACTGTGTGGCCTGAGTCAAGGCACAGTCATGACACACCCAGTCTGCTCCCTGGGGAGGCGGGAATGAATGAAGCACCGGAAGTCTCTCCCCTCCCCCATCCTTCATCCCCACCCCAGGCTTGAACTGAAGCCAGGAACAGGGTCTGGCAGGAGCTTGGGA	-	chr1_11999354_11999602_E2F1_HUMAN.H11MO.0.A_center168	E2F1	CCTTCCGCC	168	ETS	ACCGGAAGT	410	401	422	2129	1861	1563	4.15988	3.82043	0.339442	2.51241	-1.30803	1.64747
chr1_11999354_11999602_E2F1_HUMAN.H11MO.0.A_center168_to_FOSL1_MA0477.1	chr1_11999354_11999602	AGAATGGGACCTCTGGGCACCCCTGGTTTGACTGTGCCACCGGATGCCCCCTCCTCCCCAAGCAGTCCCAGCCCAAGGCGTGGGTGGTCACTGTGTGGCCTGAGTCAAGGCACAGTCATGACACACCCAGTCTGCTCCCTGGGGAGGCGGGAATGAATGAAGCGTGACTCATCTCTCCCCTCCCCCATCCTTCATCCCCACCCCAGGCTTGAACTGAAGCCAGGAACAGGGTCTGGCAGGAGCTTGGGA	-	chr1_11999354_11999602_E2F1_HUMAN.H11MO.0.A_center168	E2F1	CCTTCCGCC	168	AP-1	GTGACTCAT	270	297	293	3045	2573	2635	5.22452	3.82043	1.40409	2.51241	-1.30803	2.71212
chr1_11999354_11999602_E2F1_HUMAN.H11MO.0.A_center168_to_MAFK_MA0496.2	chr1_11999354_11999602	AGAATGGGACCTCTGGGCACCCCTGGTTTGACTGTGCCACCGGATGCCCCCTCCTCCCCAAGCAGTCCCAGCCCAAGGCGTGGGTGGTCACTGTGTGGCCTGAGTCAAGGCACAGTCATGACACACCCAGTCTGCTCCCTGGGGAGGCGGGAATGAATGAATGCTGAGTCAGCACTCCCCTCCCCCATCCTTCATCCCCACCCCAGGCTTGAACTGAAGCCAGGAACAGGGTCTGGCAGGAGCTTGGGA	-	chr1_11999354_11999602_E2F1_HUMAN.H11MO.0.A_center168	E2F1	GCCCTTCCGCCCT	168	MAF	TGCTGAGTCAGCA	257	297	252	1655	1335	1248	4.37146	3.82043	0.551021	2.51241	-1.30803	1.85905
chr1_11999354_11999602_E2F1_HUMAN.H11MO.0.A_center168_to_MECP2_HUMAN.H11MO.0.C	chr1_11999354_11999602	AGAATGGGACCTCTGGGCACCCCTGGTTTGACTGTGCCACCGGATGCCCCCTCCTCCCCAAGCAGTCCCAGCCCAAGGCGTGGGTGGTCACTGTGTGGCCTGAGTCAAGGCACAGTCATGACACACCCAGTCTGCTCCCTGGGGAGGCGGGAATGAATGAAGCCCCCGGAGCCTCTCCCCTCCCCCATCCTTCATCCCCACCCCAGGCTTGAACTGAAGCCAGGAACAGGGTCTGGCAGGAGCTTGGGA	-	chr1_11999354_11999602_E2F1_HUMAN.H11MO.0.A_center168	E2F1	CTTCCGC	168	MECP2	CCCGGAG	98	99	128	220	177	167	2.76545	3.82043	-1.05498	2.51241	-1.30803	0.25305
chr1_11999354_11999602_E2F1_HUMAN.H11MO.0.A_center168_to_TP53_MA0106.3	chr1_11999354_11999602	AGAATGGGACCTCTGGGCACCCCTGGTTTGACTGTGCCACCGGATGCCCCCTCCTCCCCAAGCAGTCCCAGCCCAAGGCGTGGGTGGTCACTGTGTGGCCTGAGTCAAGGCACAGTCATGACACACCCAGTCTGCTCCCTGGGGAGGCGGGAATGAATGAACATGCCCGGGCATGTCCCCTCCCCCATCCTTCATCCCCACCCCAGGCTTGAACTGAAGCCAGGAACAGGGTCTGGCAGGAGCTTGGGA	-	chr1_11999354_11999602_E2F1_HUMAN.H11MO.0.A_center168	E2F1	AGCCCTTCCGCCCTCT	168	P53	ACATGCCCGGGCATGT	238	281	263	2002	1603	2172	4.80386	3.82043	0.983423	2.51241	-1.30803	2.29145
chr1_11999354_11999602_EGR1_C2H2_1_center173_to_CREB1_MA0018.3	chr1_11999354_11999602	AGAATGGGACCTCTGGGCACCCCTGGTTTGACTGTGCCACCGGATGCCCCCTCCTCCCCAAGCAGTCCCAGCCCAAGGCGTGGGTGGTCACTGTGTGGCCTGAGTCAAGGCACAGTCATGACACACCCAGTCTGCTCCCTGGGGAGGCGGGAATGAATGAAGCCCTTCCTGACGTCACCCTCCCCCATCCTTCATCCCCACCCCAGGCTTGAACTGAAGCCAGGAACAGGGTCTGGCAGGAGCTTGGGA	-	chr1_11999354_11999602_EGR1_C2H2_1_center173	EGR1	GCCCTCTC	173	CREB1	TGACGTCA	413	455	414	1413	1300	1070	3.55135	3.82043	-0.269087	2.67772	-1.14272	0.87363
chr1_11999354_11999602_EGR1_C2H2_1_center173_to_E2F1_HUMAN.H11MO.0.A	chr1_11999354_11999602	AGAATGGGACCTCTGGGCACCCCTGGTTTGACTGTGCCACCGGATGCCCCCTCCTCCCCAAGCAGTCCCAGCCCAAGGCGTGGGTGGTCACTGTGTGGCCTGAGTCAAGGCACAGTCATGACACACCCAGTCTGCTCCCTGGGGAGGCGGGAATGAATGAAGCCCTTCCGGCGGGAACCCTCCCCCATCCTTCATCCCCACCCCAGGCTTGAACTGAAGCCAGGAACAGGGTCTGGCAGGAGCTTGGGA	-	chr1_11999354_11999602_EGR1_C2H2_1_center173	EGR1	GCCCTCTC	173	E2F1	GGCGGGAA	565	584	585	1732	1531	1324	3.38788	3.82043	-0.432558	2.67772	-1.14272	0.710158
chr1_11999354_11999602_EGR1_C2H2_1_center173_to_ETS1_HUMAN.H11MO.0.A	chr1_11999354_11999602	AGAATGGGACCTCTGGGCACCCCTGGTTTGACTGTGCCACCGGATGCCCCCTCCTCCCCAAGCAGTCCCAGCCCAAGGCGTGGGTGGTCACTGTGTGGCCTGAGTCAAGGCACAGTCATGACACACCCAGTCTGCTCCCTGGGGAGGCGGGAATGAATGAAGCCCTTCACCGGAAGTCCCTCCCCCATCCTTCATCCCCACCCCAGGCTTGAACTGAAGCCAGGAACAGGGTCTGGCAGGAGCTTGGGA	-	chr1_11999354_11999602_EGR1_C2H2_1_center173	EGR1	CGCCCTCTC	173	ETS	ACCGGAAGT	200	203	181	398	375	367	2.92304	3.82043	-0.897398	2.67772	-1.14272	0.245319
chr1_11999354_11999602_EGR1_C2H2_1_center173_to_FOSL1_MA0477.1	chr1_11999354_11999602	AGAATGGGACCTCTGGGCACCCCTGGTTTGACTGTGCCACCGGATGCCCCCTCCTCCCCAAGCAGTCCCAGCCCAAGGCGTGGGTGGTCACTGTGTGGCCTGAGTCAAGGCACAGTCATGACACACCCAGTCTGCTCCCTGGGGAGGCGGGAATGAATGAAGCCCTTCGTGACTCATCCCTCCCCCATCCTTCATCCCCACCCCAGGCTTGAACTGAAGCCAGGAACAGGGTCTGGCAGGAGCTTGGGA	-	chr1_11999354_11999602_EGR1_C2H2_1_center173	EGR1	CGCCCTCTC	173	AP-1	GTGACTCAT	731	777	736	4370	3759	3586	4.35556	3.82043	0.535131	2.67772	-1.14272	1.67785
chr1_11999354_11999602_EGR1_C2H2_1_center173_to_MAFK_MA0496.2	chr1_11999354_11999602	AGAATGGGACCTCTGGGCACCCCTGGTTTGACTGTGCCACCGGATGCCCCCTCCTCCCCAAGCAGTCCCAGCCCAAGGCGTGGGTGGTCACTGTGTGGCCTGAGTCAAGGCACAGTCATGACACACCCAGTCTGCTCCCTGGGGAGGCGGGAATGAATGAAGCCCTTGCTGAGTCAGCACTCCCCCATCCTTCATCCCCACCCCAGGCTTGAACTGAAGCCAGGAACAGGGTCTGGCAGGAGCTTGGGA	-	chr1_11999354_11999602_EGR1_C2H2_1_center173	EGR1	TCCGCCCTCTCCC	173	MAF	TGCTGAGTCAGCA	184	163	158	482	392	339	3.24572	3.82043	-0.574716	2.67772	-1.14272	0.568001
chr1_11999354_11999602_EGR1_C2H2_1_center173_to_MECP2_HUMAN.H11MO.0.C	chr1_11999354_11999602	AGAATGGGACCTCTGGGCACCCCTGGTTTGACTGTGCCACCGGATGCCCCCTCCTCCCCAAGCAGTCCCAGCCCAAGGCGTGGGTGGTCACTGTGTGGCCTGAGTCAAGGCACAGTCATGACACACCCAGTCTGCTCCCTGGGGAGGCGGGAATGAATGAAGCCCTTCCCCCGGAGCCCCTCCCCCATCCTTCATCCCCACCCCAGGCTTGAACTGAAGCCAGGAACAGGGTCTGGCAGGAGCTTGGGA	-	chr1_11999354_11999602_EGR1_C2H2_1_center173	EGR1	GCCCTCT	173	MECP2	CCCGGAG	516	564	549	977	792	793	2.61917	3.82043	-1.20126	2.67772	-1.14272	-0.0585444
chr1_11999354_11999602_EGR1_C2H2_1_center173_to_TP53_MA0106.3	chr1_11999354_11999602	AGAATGGGACCTCTGGGCACCCCTGGTTTGACTGTGCCACCGGATGCCCCCTCCTCCCCAAGCAGTCCCAGCCCAAGGCGTGGGTGGTCACTGTGTGGCCTGAGTCAAGGCACAGTCATGACACACCCAGTCTGCTCCCTGGGGAGGCGGGAATGAATGAAGCCCACATGCCCGGGCATGTCCCCCATCCTTCATCCCCACCCCAGGCTTGAACTGAAGCCAGGAACAGGGTCTGGCAGGAGCTTGGGA	-	chr1_11999354_11999602_EGR1_C2H2_1_center173	EGR1	TTCCGCCCTCTCCCCT	173	P53	ACATGCCCGGGCATGT	211	229	240	1320	1050	1341	4.37677	3.82043	0.55634	2.67772	-1.14272	1.69906
chr1_11999354_11999602_EGR1_C2H2_1_center49_to_CREB1_MA0018.3	chr1_11999354_11999602	AGAATGGGACCTCTGGGCACCCCTGGTTTGACTGTGCCACCGGATTGACGTCACTCCCCAAGCAGTCCCAGCCCAAGGCGTGGGTGGTCACTGTGTGGCCTGAGTCAAGGCACAGTCATGACACACCCAGTCTGCTCCCTGGGGAGGCGGGAATGAATGAAGCCCTTCCGCCCTCTCCCCTCCCCCATCCTTCATCCCCACCCCAGGCTTGAACTGAAGCCAGGAACAGGGTCTGGCAGGAGCTTGGGA	-	chr1_11999354_11999602_EGR1_C2H2_1_center49	EGR1	GCCCCCTC	49	CREB1	TGACGTCA	339	394	367	2843	2404	2038	4.71833	3.82043	0.897893	2.6561	-1.16433	2.06223
chr1_11999354_11999602_EGR1_C2H2_1_center49_to_E2F1_HUMAN.H11MO.0.A	chr1_11999354_11999602	AGAATGGGACCTCTGGGCACCCCTGGTTTGACTGTGCCACCGGATGGCGGGAACTCCCCAAGCAGTCCCAGCCCAAGGCGTGGGTGGTCACTGTGTGGCCTGAGTCAAGGCACAGTCATGACACACCCAGTCTGCTCCCTGGGGAGGCGGGAATGAATGAAGCCCTTCCGCCCTCTCCCCTCCCCCATCCTTCATCCCCACCCCAGGCTTGAACTGAAGCCAGGAACAGGGTCTGGCAGGAGCTTGGGA	-	chr1_11999354_11999602_EGR1_C2H2_1_center49	EGR1	GCCCCCTC	49	E2F1	GGCGGGAA	292	331	325	764	695	866	3.219	3.82043	-0.60143	2.6561	-1.16433	0.562903
chr1_11999354_11999602_EGR1_C2H2_1_center49_to_ETS1_HUMAN.H11MO.0.A	chr1_11999354_11999602	AGAATGGGACCTCTGGGCACCCCTGGTTTGACTGTGCCACCGGAACCGGAAGTCTCCCCAAGCAGTCCCAGCCCAAGGCGTGGGTGGTCACTGTGTGGCCTGAGTCAAGGCACAGTCATGACACACCCAGTCTGCTCCCTGGGGAGGCGGGAATGAATGAAGCCCTTCCGCCCTCTCCCCTCCCCCATCCTTCATCCCCACCCCAGGCTTGAACTGAAGCCAGGAACAGGGTCTGGCAGGAGCTTGGGA	-	chr1_11999354_11999602_EGR1_C2H2_1_center49	EGR1	TGCCCCCTC	49	ETS	ACCGGAAGT	251	266	250	934	806	782	3.68423	3.82043	-0.136202	2.6561	-1.16433	1.02813
chr1_11999354_11999602_EGR1_C2H2_1_center49_to_FOSL1_MA0477.1	chr1_11999354_11999602	AGAATGGGACCTCTGGGCACCCCTGGTTTGACTGTGCCACCGGAGTGACTCATCTCCCCAAGCAGTCCCAGCCCAAGGCGTGGGTGGTCACTGTGTGGCCTGAGTCAAGGCACAGTCATGACACACCCAGTCTGCTCCCTGGGGAGGCGGGAATGAATGAAGCCCTTCCGCCCTCTCCCCTCCCCCATCCTTCATCCCCACCCCAGGCTTGAACTGAAGCCAGGAACAGGGTCTGGCAGGAGCTTGGGA	-	chr1_11999354_11999602_EGR1_C2H2_1_center49	EGR1	TGCCCCCTC	49	AP-1	GTGACTCAT	177	161	184	1497	1224	1034	4.83628	3.82043	1.01585	2.6561	-1.16433	2.18018
chr1_11999354_11999602_EGR1_C2H2_1_center49_to_MAFK_MA0496.2	chr1_11999354_11999602	AGAATGGGACCTCTGGGCACCCCTGGTTTGACTGTGCCACCGTGCTGAGTCAGCACCCCAAGCAGTCCCAGCCCAAGGCGTGGGTGGTCACTGTGTGGCCTGAGTCAAGGCACAGTCATGACACACCCAGTCTGCTCCCTGGGGAGGCGGGAATGAATGAAGCCCTTCCGCCCTCTCCCCTCCCCCATCCTTCATCCCCACCCCAGGCTTGAACTGAAGCCAGGAACAGGGTCTGGCAGGAGCTTGGGA	-	chr1_11999354_11999602_EGR1_C2H2_1_center49	EGR1	GATGCCCCCTCCT	49	MAF	TGCTGAGTCAGCA	543	602	559	2147	1812	1589	3.68795	3.82043	-0.132487	2.6561	-1.16433	1.03185
chr1_11999354_11999602_EGR1_C2H2_1_center49_to_MECP2_HUMAN.H11MO.0.C	chr1_11999354_11999602	AGAATGGGACCTCTGGGCACCCCTGGTTTGACTGTGCCACCGGATCCCGGAGCCTCCCCAAGCAGTCCCAGCCCAAGGCGTGGGTGGTCACTGTGTGGCCTGAGTCAAGGCACAGTCATGACACACCCAGTCTGCTCCCTGGGGAGGCGGGAATGAATGAAGCCCTTCCGCCCTCTCCCCTCCCCCATCCTTCATCCCCACCCCAGGCTTGAACTGAAGCCAGGAACAGGGTCTGGCAGGAGCTTGGGA	-	chr1_11999354_11999602_EGR1_C2H2_1_center49	EGR1	GCCCCCT	49	MECP2	CCCGGAG	514	564	552	1059	864	985	2.78044	3.82043	-1.03999	2.6561	-1.16433	0.124343
chr1_11999354_11999602_EGR1_C2H2_1_center49_to_TP53_MA0106.3	chr1_11999354_11999602	AGAATGGGACCTCTGGGCACCCCTGGTTTGACTGTGCCACCACATGCCCGGGCATGTCCAAGCAGTCCCAGCCCAAGGCGTGGGTGGTCACTGTGTGGCCTGAGTCAAGGCACAGTCATGACACACCCAGTCTGCTCCCTGGGGAGGCGGGAATGAATGAAGCCCTTCCGCCCTCTCCCCTCCCCCATCCTTCATCCCCACCCCAGGCTTGAACTGAAGCCAGGAACAGGGTCTGGCAGGAGCTTGGGA	-	chr1_11999354_11999602_EGR1_C2H2_1_center49	EGR1	GGATGCCCCCTCCTCC	49	P53	ACATGCCCGGGCATGT	380	368	412	3661	2974	3818	5.09752	3.82043	1.27709	2.6561	-1.16433	2.44142
chr1_11999354_11999602_EGR1_C2H2_1_center82_to_CREB1_MA0018.3	chr1_11999354_11999602	AGAATGGGACCTCTGGGCACCCCTGGTTTGACTGTGCCACCGGATGCCCCCTCCTCCCCAAGCAGTCCCAGCCCAAGGTGACGTCAGTCACTGTGTGGCCTGAGTCAAGGCACAGTCATGACACACCCAGTCTGCTCCCTGGGGAGGCGGGAATGAATGAAGCCCTTCCGCCCTCTCCCCTCCCCCATCCTTCATCCCCACCCCAGGCTTGAACTGAAGCCAGGAACAGGGTCTGGCAGGAGCTTGGGA	-	chr1_11999354_11999602_EGR1_C2H2_1_center82	EGR1	CGTGGGTG	82	CREB1	TGACGTCA	135	149	135	635	630	476	4.05344	3.82043	0.233002	1.14688	-2.67356	2.90656
chr1_11999354_11999602_EGR1_C2H2_1_center82_to_E2F1_HUMAN.H11MO.0.A	chr1_11999354_11999602	AGAATGGGACCTCTGGGCACCCCTGGTTTGACTGTGCCACCGGATGCCCCCTCCTCCCCAAGCAGTCCCAGCCCAAGGGGCGGGAAGTCACTGTGTGGCCTGAGTCAAGGCACAGTCATGACACACCCAGTCTGCTCCCTGGGGAGGCGGGAATGAATGAAGCCCTTCCGCCCTCTCCCCTCCCCCATCCTTCATCCCCACCCCAGGCTTGAACTGAAGCCAGGAACAGGGTCTGGCAGGAGCTTGGGA	-	chr1_11999354_11999602_EGR1_C2H2_1_center82	EGR1	CGTGGGTG	82	E2F1	GGCGGGAA	188	220	205	237	201	227	2.05746	3.82043	-1.76298	1.14688	-2.67356	0.910578
chr1_11999354_11999602_EGR1_C2H2_1_center82_to_ETS1_HUMAN.H11MO.0.A	chr1_11999354_11999602	AGAATGGGACCTCTGGGCACCCCTGGTTTGACTGTGCCACCGGATGCCCCCTCCTCCCCAAGCAGTCCCAGCCCAAGACCGGAAGTGTCACTGTGTGGCCTGAGTCAAGGCACAGTCATGACACACCCAGTCTGCTCCCTGGGGAGGCGGGAATGAATGAAGCCCTTCCGCCCTCTCCCCTCCCCCATCCTTCATCCCCACCCCAGGCTTGAACTGAAGCCAGGAACAGGGTCTGGCAGGAGCTTGGGA	-	chr1_11999354_11999602_EGR1_C2H2_1_center82	EGR1	GCGTGGGTG	82	ETS	ACCGGAAGT	343	363	397	1153	1003	935	3.46137	3.82043	-0.359063	1.14688	-2.67356	2.31449
chr1_11999354_11999602_EGR1_C2H2_1_center82_to_FOSL1_MA0477.1	chr1_11999354_11999602	AGAATGGGACCTCTGGGCACCCCTGGTTTGACTGTGCCACCGGATGCCCCCTCCTCCCCAAGCAGTCCCAGCCCAAGGTGACTCATGTCACTGTGTGGCCTGAGTCAAGGCACAGTCATGACACACCCAGTCTGCTCCCTGGGGAGGCGGGAATGAATGAAGCCCTTCCGCCCTCTCCCCTCCCCCATCCTTCATCCCCACCCCAGGCTTGAACTGAAGCCAGGAACAGGGTCTGGCAGGAGCTTGGGA	-	chr1_11999354_11999602_EGR1_C2H2_1_center82	EGR1	GCGTGGGTG	82	AP-1	GTGACTCAT	107	125	113	942	801	754	4.82917	3.82043	1.00874	1.14688	-2.67356	3.6823
chr1_11999354_11999602_EGR1_C2H2_1_center82_to_MAFK_MA0496.2	chr1_11999354_11999602	AGAATGGGACCTCTGGGCACCCCTGGTTTGACTGTGCCACCGGATGCCCCCTCCTCCCCAAGCAGTCCCAGCCCATGCTGAGTCAGCACACTGTGTGGCCTGAGTCAAGGCACAGTCATGACACACCCAGTCTGCTCCCTGGGGAGGCGGGAATGAATGAAGCCCTTCCGCCCTCTCCCCTCCCCCATCCTTCATCCCCACCCCAGGCTTGAACTGAAGCCAGGAACAGGGTCTGGCAGGAGCTTGGGA	-	chr1_11999354_11999602_EGR1_C2H2_1_center82	EGR1	AGGCGTGGGTGGT	82	MAF	TGCTGAGTCAGCA	255	246	281	1164	929	935	3.91862	3.82043	0.0981827	1.14688	-2.67356	2.77174
chr1_11999354_11999602_EGR1_C2H2_1_center82_to_MECP2_HUMAN.H11MO.0.C	chr1_11999354_11999602	AGAATGGGACCTCTGGGCACCCCTGGTTTGACTGTGCCACCGGATGCCCCCTCCTCCCCAAGCAGTCCCAGCCCAAGGCCCGGAGGGTCACTGTGTGGCCTGAGTCAAGGCACAGTCATGACACACCCAGTCTGCTCCCTGGGGAGGCGGGAATGAATGAAGCCCTTCCGCCCTCTCCCCTCCCCCATCCTTCATCCCCACCCCAGGCTTGAACTGAAGCCAGGAACAGGGTCTGGCAGGAGCTTGGGA	-	chr1_11999354_11999602_EGR1_C2H2_1_center82	EGR1	CGTGGGT	82	MECP2	CCCGGAG	250	296	263	240	199	262	1.70947	3.82043	-2.11097	1.14688	-2.67356	0.562586
chr1_11999354_11999602_EGR1_C2H2_1_center82_to_TP53_MA0106.3	chr1_11999354_11999602	AGAATGGGACCTCTGGGCACCCCTGGTTTGACTGTGCCACCGGATGCCCCCTCCTCCCCAAGCAGTCCCAGCCCACATGCCCGGGCATGTCTGTGTGGCCTGAGTCAAGGCACAGTCATGACACACCCAGTCTGCTCCCTGGGGAGGCGGGAATGAATGAAGCCCTTCCGCCCTCTCCCCTCCCCCATCCTTCATCCCCACCCCAGGCTTGAACTGAAGCCAGGAACAGGGTCTGGCAGGAGCTTGGGA	-	chr1_11999354_11999602_EGR1_C2H2_1_center82	EGR1	AAGGCGTGGGTGGTCA	82	P53	ACATGCCCGGGCATGT	105	118	102	1169	841	1299	5.24849	3.82043	1.42805	1.14688	-2.67356	4.10161
chr1_120147785_120148033_TP53_MA0106.3_center122_to_E2F1_HUMAN.H11MO.0.A	chr1_120147785_120148033	CCTTGCTTCATCTCCTCCCCAGGCTACTGTACGTTTCACATTGATGTTCATGATGGACTCTCTGTGAGTGACACCGATGATGTCTATGATGGAGGTGGTGTGGATGATGACCGACATGGGCGGGAAGGCTCTCTTCAGGCATGACTCATCCAGAATGTCTCCTTCCAGCACCGTCAGCTTGGTCTTGTTCTGGAGCTCTGTGTGAACACCGGTCAGGTTATCAGAACGATTTCTGAAACGATTTCTGAA	-	chr1_120147785_120148033_TP53_MA0106.3_center122	P53	TCCTGGCA	122	E2F1	GGCGGGAA	433	468	446	213	204	381	1.09094	2.41531	-1.32437	0.177642	-2.23767	0.9133
chr1_120147785_120148033_TP53_MA0106.3_center122_to_EGR1_C2H2_1	chr1_120147785_120148033	CCTTGCTTCATCTCCTCCCCAGGCTACTGTACGTTTCACATTGATGTTCATGATGGACTCTCTGTGAGTGACACCGATGATGTCTATGATGGAGGTGGTGTGGATGATGACCGACAACGCCCACGCAGCTCTCTTCAGGCATGACTCATCCAGAATGTCTCCTTCCAGCACCGTCAGCTTGGTCTTGTTCTGGAGCTCTGTGTGAACACCGGTCAGGTTATCAGAACGATTTCTGAAACGATTTCTGAA	-	chr1_120147785_120148033_TP53_MA0106.3_center122	P53	TGTCCTGGCAG	122	EGR1	ACGCCCACGCA	176	207	207	162	171	229	1.82956	2.41531	-0.585754	0.177642	-2.23767	1.65192
chr1_120147785_120148033_TP53_MA0106.3_center122_to_ETS1_HUMAN.H11MO.0.A	chr1_120147785_120148033	CCTTGCTTCATCTCCTCCCCAGGCTACTGTACGTTTCACATTGATGTTCATGATGGACTCTCTGTGAGTGACACCGATGATGTCTATGATGGAGGTGGTGTGGATGATGACCGACATACCGGAAGTGGCTCTCTTCAGGCATGACTCATCCAGAATGTCTCCTTCCAGCACCGTCAGCTTGGTCTTGTTCTGGAGCTCTGTGTGAACACCGGTCAGGTTATCAGAACGATTTCTGAAACGATTTCTGAA	-	chr1_120147785_120148033_TP53_MA0106.3_center122	P53	GTCCTGGCA	122	ETS	ACCGGAAGT	579	594	619	1120	1028	1397	2.89249	2.41531	0.477174	0.177642	-2.23767	2.71484
chr1_120147785_120148033_TP53_MA0106.3_center122_to_FOSL1_MA0477.1	chr1_120147785_120148033	CCTTGCTTCATCTCCTCCCCAGGCTACTGTACGTTTCACATTGATGTTCATGATGGACTCTCTGTGAGTGACACCGATGATGTCTATGATGGAGGTGGTGTGGATGATGACCGACATGTGACTCATGGCTCTCTTCAGGCATGACTCATCCAGAATGTCTCCTTCCAGCACCGTCAGCTTGGTCTTGTTCTGGAGCTCTGTGTGAACACCGGTCAGGTTATCAGAACGATTTCTGAAACGATTTCTGAA	-	chr1_120147785_120148033_TP53_MA0106.3_center122	P53	GTCCTGGCA	122	AP-1	GTGACTCAT	291	324	288	659	693	592	3.08482	2.41531	0.669505	0.177642	-2.23767	2.90717
chr1_120147785_120148033_TP53_MA0106.3_center122_to_MAFK_MA0496.2	chr1_120147785_120148033	CCTTGCTTCATCTCCTCCCCAGGCTACTGTACGTTTCACATTGATGTTCATGATGGACTCTCTGTGAGTGACACCGATGATGTCTATGATGGAGGTGGTGTGGATGATGACCGACTGCTGAGTCAGCACTCTCTTCAGGCATGACTCATCCAGAATGTCTCCTTCCAGCACCGTCAGCTTGGTCTTGTTCTGGAGCTCTGTGTGAACACCGGTCAGGTTATCAGAACGATTTCTGAAACGATTTCTGAA	-	chr1_120147785_120148033_TP53_MA0106.3_center122	P53	ATGTCCTGGCAGG	122	MAF	TGCTGAGTCAGCA	439	478	480	699	664	721	2.52223	2.41531	0.10692	0.177642	-2.23767	2.34459
chr1_146633736_146633984_FOSL1_MA0477.1_center125_to_CREB1_MA0018.3	chr1_146633736_146633984	GTGTCTAGGACCATTTGGACCAAAGTTCAGTAATCCTAGAGGTTAGGATTACTACAGAGGTGTGTTGAGATTATAAGTCATACACATACCAATAACATTACAGATTTCCTTTTTCCAGTGGTGACGTCAAGCTTTTTCAGGTACTGATATAAAAATTCATAGTTGTCTCCTCATCCTAATAAAATCAGGATCAGAGCTATGGACTTCTTTTGAGCACAACATAAAGGAGTAGTTATCATTTGGGGGTGT	-	chr1_146633736_146633984_FOSL1_MA0477.1_center125	AP-1	TGAGTCAC	125	CREB1	TGACGTCA	183	178	197	106	112	122	1.212	2.62576	-1.41377	-0.324011	-2.94977	1.53601
chr1_146633736_146633984_FOSL1_MA0477.1_center125_to_E2F1_HUMAN.H11MO.0.A	chr1_146633736_146633984	GTGTCTAGGACCATTTGGACCAAAGTTCAGTAATCCTAGAGGTTAGGATTACTACAGAGGTGTGTTGAGATTATAAGTCATACACATACCAATAACATTACAGATTTCCTTTTTCCAGTGGGGCGGGAAAGCTTTTTCAGGTACTGATATAAAAATTCATAGTTGTCTCCTCATCCTAATAAAATCAGGATCAGAGCTATGGACTTCTTTTGAGCACAACATAAAGGAGTAGTTATCATTTGGGGGTGT	-	chr1_146633736_146633984_FOSL1_MA0477.1_center125	AP-1	TGAGTCAC	125	E2F1	GGCGGGAA	180	183	223	48	42	61	-0.0721097	2.62576	-2.69787	-0.324011	-2.94977	0.251902
chr1_146633736_146633984_FOSL1_MA0477.1_center125_to_EGR1_C2H2_1	chr1_146633736_146633984	GTGTCTAGGACCATTTGGACCAAAGTTCAGTAATCCTAGAGGTTAGGATTACTACAGAGGTGTGTTGAGATTATAAGTCATACACATACCAATAACATTACAGATTTCCTTTTTCCAGTACGCCCACGCAGCTTTTTCAGGTACTGATATAAAAATTCATAGTTGTCTCCTCATCCTAATAAAATCAGGATCAGAGCTATGGACTTCTTTTGAGCACAACATAAAGGAGTAGTTATCATTTGGGGGTGT	-	chr1_146633736_146633984_FOSL1_MA0477.1_center125	AP-1	GGTGAGTCACA	125	EGR1	ACGCCCACGCA	120	128	123	149	135	125	2.10244	2.62576	-0.523327	-0.324011	-2.94977	2.42645
chr1_146633736_146633984_FOSL1_MA0477.1_center125_to_ETS1_HUMAN.H11MO.0.A	chr1_146633736_146633984	GTGTCTAGGACCATTTGGACCAAAGTTCAGTAATCCTAGAGGTTAGGATTACTACAGAGGTGTGTTGAGATTATAAGTCATACACATACCAATAACATTACAGATTTCCTTTTTCCAGTGACCGGAAGTAGCTTTTTCAGGTACTGATATAAAAATTCATAGTTGTCTCCTCATCCTAATAAAATCAGGATCAGAGCTATGGACTTCTTTTGAGCACAACATAAAGGAGTAGTTATCATTTGGGGGTGT	-	chr1_146633736_146633984_FOSL1_MA0477.1_center125	AP-1	GTGAGTCAC	125	ETS	ACCGGAAGT	41	44	51	26	14	24	0.788842	2.62576	-1.83692	-0.324011	-2.94977	1.11285
chr1_146633736_146633984_FOSL1_MA0477.1_center125_to_MECP2_HUMAN.H11MO.0.C	chr1_146633736_146633984	GTGTCTAGGACCATTTGGACCAAAGTTCAGTAATCCTAGAGGTTAGGATTACTACAGAGGTGTGTTGAGATTATAAGTCATACACATACCAATAACATTACAGATTTCCTTTTTCCAGTGGCCCGGAGCAGCTTTTTCAGGTACTGATATAAAAATTCATAGTTGTCTCCTCATCCTAATAAAATCAGGATCAGAGCTATGGACTTCTTTTGAGCACAACATAAAGGAGTAGTTATCATTTGGGGGTGT	-	chr1_146633736_146633984_FOSL1_MA0477.1_center125	AP-1	TGAGTCA	125	MECP2	CCCGGAG	117	122	100	29	16	33	-0.260563	2.62576	-2.88633	-0.324011	-2.94977	0.0634482
chr1_146633736_146633984_FOSL1_MA0477.1_center125_to_TP53_MA0106.3	chr1_146633736_146633984	GTGTCTAGGACCATTTGGACCAAAGTTCAGTAATCCTAGAGGTTAGGATTACTACAGAGGTGTGTTGAGATTATAAGTCATACACATACCAATAACATTACAGATTTCCTTTTTCCAACATGCCCGGGCATGTTTTTCAGGTACTGATATAAAAATTCATAGTTGTCTCCTCATCCTAATAAAATCAGGATCAGAGCTATGGACTTCTTTTGAGCACAACATAAAGGAGTAGTTATCATTTGGGGGTGT	-	chr1_146633736_146633984_FOSL1_MA0477.1_center125	AP-1	GTGGTGAGTCACAGCT	125	P53	ACATGCCCGGGCATGT	67	74	62	118	115	164	2.85633	2.62576	0.230567	-0.324011	-2.94977	3.18034
chr1_150551043_150551291_E2F1_HUMAN.H11MO.0.A_center132_to_CREB1_MA0018.3	chr1_150551043_150551291	CTCACTCCCTTTTTTCCATCTCTCCCCGGACTCACCCGCCAAGGGTGGGTTGGAAACCGAAACGAGTCAGTGTTGAAACGTGTCTCATCCTATTCCTGAAGCCAGAATATTCTGGCCATGAGTCATTGTGACGTCACATCTTGATTCTTTTGGAAATGGCAGCTCTTGTTCAAAGACCGGAAAGGGTGGGATGTCAATTTCAAGTGGGGTCAACCTGAGTTCTGTAAATCCCAGTAGCGATTTTCCCGC	-	chr1_150551043_150551291_E2F1_HUMAN.H11MO.0.A_center132	E2F1	TTTCCGCC	132	CREB1	TGACGTCA	269	287	321	1060	1076	725	3.72243	3.54423	0.178201	1.22102	-2.3232	2.50141
chr1_150551043_150551291_E2F1_HUMAN.H11MO.0.A_center132_to_EGR1_C2H2_1	chr1_150551043_150551291	CTCACTCCCTTTTTTCCATCTCTCCCCGGACTCACCCGCCAAGGGTGGGTTGGAAACCGAAACGAGTCAGTGTTGAAACGTGTCTCATCCTATTCCTGAAGCCAGAATATTCTGGCCATGAGTCATACGCCCACGCAATCTTGATTCTTTTGGAAATGGCAGCTCTTGTTCAAAGACCGGAAAGGGTGGGATGTCAATTTCAAGTGGGGTCAACCTGAGTTCTGTAAATCCCAGTAGCGATTTTCCCGC	-	chr1_150551043_150551291_E2F1_HUMAN.H11MO.0.A_center132	E2F1	TGTTTCCGCCC	132	EGR1	ACGCCCACGCA	359	403	362	1662	1474	1300	3.96243	3.54423	0.418199	1.22102	-2.3232	2.7414
chr1_150551043_150551291_E2F1_HUMAN.H11MO.0.A_center132_to_ETS1_HUMAN.H11MO.0.A	chr1_150551043_150551291	CTCACTCCCTTTTTTCCATCTCTCCCCGGACTCACCCGCCAAGGGTGGGTTGGAAACCGAAACGAGTCAGTGTTGAAACGTGTCTCATCCTATTCCTGAAGCCAGAATATTCTGGCCATGAGTCATTACCGGAAGTCATCTTGATTCTTTTGGAAATGGCAGCTCTTGTTCAAAGACCGGAAAGGGTGGGATGTCAATTTCAAGTGGGGTCAACCTGAGTTCTGTAAATCCCAGTAGCGATTTTCCCGC	-	chr1_150551043_150551291_E2F1_HUMAN.H11MO.0.A_center132	E2F1	GTTTCCGCC	132	ETS	ACCGGAAGT	493	523	529	2047	1835	1484	3.79069	3.54423	0.246465	1.22102	-2.3232	2.56967
chr1_150551043_150551291_E2F1_HUMAN.H11MO.0.A_center132_to_FOSL1_MA0477.1	chr1_150551043_150551291	CTCACTCCCTTTTTTCCATCTCTCCCCGGACTCACCCGCCAAGGGTGGGTTGGAAACCGAAACGAGTCAGTGTTGAAACGTGTCTCATCCTATTCCTGAAGCCAGAATATTCTGGCCATGAGTCATTGTGACTCATCATCTTGATTCTTTTGGAAATGGCAGCTCTTGTTCAAAGACCGGAAAGGGTGGGATGTCAATTTCAAGTGGGGTCAACCTGAGTTCTGTAAATCCCAGTAGCGATTTTCCCGC	-	chr1_150551043_150551291_E2F1_HUMAN.H11MO.0.A_center132	E2F1	GTTTCCGCC	132	AP-1	GTGACTCAT	746	738	805	4674	4149	3520	4.41879	3.54423	0.87456	1.22102	-2.3232	3.19776
chr1_150551043_150551291_E2F1_HUMAN.H11MO.0.A_center132_to_MAFK_MA0496.2	chr1_150551043_150551291	CTCACTCCCTTTTTTCCATCTCTCCCCGGACTCACCCGCCAAGGGTGGGTTGGAAACCGAAACGAGTCAGTGTTGAAACGTGTCTCATCCTATTCCTGAAGCCAGAATATTCTGGCCATGAGTCATGCTGAGTCAGCATCTTGATTCTTTTGGAAATGGCAGCTCTTGTTCAAAGACCGGAAAGGGTGGGATGTCAATTTCAAGTGGGGTCAACCTGAGTTCTGTAAATCCCAGTAGCGATTTTCCCGC	-	chr1_150551043_150551291_E2F1_HUMAN.H11MO.0.A_center132	E2F1	TTGTTTCCGCCCA	132	MAF	TGCTGAGTCAGCA	217	198	202	731	637	524	3.60511	3.54423	0.0608823	1.22102	-2.3232	2.38409
chr1_150551043_150551291_E2F1_HUMAN.H11MO.0.A_center132_to_MECP2_HUMAN.H11MO.0.C	chr1_150551043_150551291	CTCACTCCCTTTTTTCCATCTCTCCCCGGACTCACCCGCCAAGGGTGGGTTGGAAACCGAAACGAGTCAGTGTTGAAACGTGTCTCATCCTATTCCTGAAGCCAGAATATTCTGGCCATGAGTCATTGCCCGGAGCCATCTTGATTCTTTTGGAAATGGCAGCTCTTGTTCAAAGACCGGAAAGGGTGGGATGTCAATTTCAAGTGGGGTCAACCTGAGTTCTGTAAATCCCAGTAGCGATTTTCCCGC	-	chr1_150551043_150551291_E2F1_HUMAN.H11MO.0.A_center132	E2F1	TTTCCGC	132	MECP2	CCCGGAG	310	298	334	643	576	589	2.89688	3.54423	-0.647352	1.22102	-2.3232	1.67585
chr1_150551043_150551291_E2F1_HUMAN.H11MO.0.A_center132_to_TP53_MA0106.3	chr1_150551043_150551291	CTCACTCCCTTTTTTCCATCTCTCCCCGGACTCACCCGCCAAGGGTGGGTTGGAAACCGAAACGAGTCAGTGTTGAAACGTGTCTCATCCTATTCCTGAAGCCAGAATATTCTGGCCATGAGTCACATGCCCGGGCATGTTTGATTCTTTTGGAAATGGCAGCTCTTGTTCAAAGACCGGAAAGGGTGGGATGTCAATTTCAAGTGGGGTCAACCTGAGTTCTGTAAATCCCAGTAGCGATTTTCCCGC	-	chr1_150551043_150551291_E2F1_HUMAN.H11MO.0.A_center132	E2F1	ATTGTTTCCGCCCATC	132	P53	ACATGCCCGGGCATGT	365	337	341	1355	1097	1243	3.76888	3.54423	0.224648	1.22102	-2.3232	2.54785
chr1_150551043_150551291_ETS1_HUMAN.H11MO.0.A_center180_to_CREB1_MA0018.3	chr1_150551043_150551291	CTCACTCCCTTTTTTCCATCTCTCCCCGGACTCACCCGCCAAGGGTGGGTTGGAAACCGAAACGAGTCAGTGTTGAAACGTGTCTCATCCTATTCCTGAAGCCAGAATATTCTGGCCATGAGTCATTGTTTCCGCCCATCTTGATTCTTTTGGAAATGGCAGCTCTTGTTCAAAGATGACGTCAGGTGGGATGTCAATTTCAAGTGGGGTCAACCTGAGTTCTGTAAATCCCAGTAGCGATTTTCCCGC	-	chr1_150551043_150551291_ETS1_HUMAN.H11MO.0.A_center180	ETS	CCGGAAAG	180	CREB1	TGACGTCA	315	356	320	1062	1048	701	3.52107	3.54423	-0.0231529	2.46411	-1.08012	1.05696
chr1_150551043_150551291_ETS1_HUMAN.H11MO.0.A_center180_to_EGR1_C2H2_1	chr1_150551043_150551291	CTCACTCCCTTTTTTCCATCTCTCCCCGGACTCACCCGCCAAGGGTGGGTTGGAAACCGAAACGAGTCAGTGTTGAAACGTGTCTCATCCTATTCCTGAAGCCAGAATATTCTGGCCATGAGTCATTGTTTCCGCCCATCTTGATTCTTTTGGAAATGGCAGCTCTTGTTCAAAACGCCCACGCAGTGGGATGTCAATTTCAAGTGGGGTCAACCTGAGTTCTGTAAATCCCAGTAGCGATTTTCCCGC	-	chr1_150551043_150551291_ETS1_HUMAN.H11MO.0.A_center180	ETS	GACCGGAAAGG	180	EGR1	ACGCCCACGCA	668	700	715	2084	1956	1500	3.41161	3.54423	-0.132615	2.46411	-1.08012	0.9475
chr1_150551043_150551291_ETS1_HUMAN.H11MO.0.A_center180_to_FOSL1_MA0477.1	chr1_150551043_150551291	CTCACTCCCTTTTTTCCATCTCTCCCCGGACTCACCCGCCAAGGGTGGGTTGGAAACCGAAACGAGTCAGTGTTGAAACGTGTCTCATCCTATTCCTGAAGCCAGAATATTCTGGCCATGAGTCATTGTTTCCGCCCATCTTGATTCTTTTGGAAATGGCAGCTCTTGTTCAAAGGTGACTCATGGTGGGATGTCAATTTCAAGTGGGGTCAACCTGAGTTCTGTAAATCCCAGTAGCGATTTTCCCGC	-	chr1_150551043_150551291_ETS1_HUMAN.H11MO.0.A_center180	ETS	ACCGGAAAG	180	AP-1	GTGACTCAT	573	616	606	2453	2357	1928	3.8989	3.54423	0.354674	2.46411	-1.08012	1.43479
chr1_150551043_150551291_ETS1_HUMAN.H11MO.0.A_center180_to_MAFK_MA0496.2	chr1_150551043_150551291	CTCACTCCCTTTTTTCCATCTCTCCCCGGACTCACCCGCCAAGGGTGGGTTGGAAACCGAAACGAGTCAGTGTTGAAACGTGTCTCATCCTATTCCTGAAGCCAGAATATTCTGGCCATGAGTCATTGTTTCCGCCCATCTTGATTCTTTTGGAAATGGCAGCTCTTGTTCAATGCTGAGTCAGCATGGGATGTCAATTTCAAGTGGGGTCAACCTGAGTTCTGTAAATCCCAGTAGCGATTTTCCCGC	-	chr1_150551043_150551291_ETS1_HUMAN.H11MO.0.A_center180	ETS	AGACCGGAAAGGG	180	MAF	TGCTGAGTCAGCA	408	445	450	1359	1139	867	3.37388	3.54423	-0.170345	2.46411	-1.08012	0.909771
chr1_150551043_150551291_ETS1_HUMAN.H11MO.0.A_center180_to_MECP2_HUMAN.H11MO.0.C	chr1_150551043_150551291	CTCACTCCCTTTTTTCCATCTCTCCCCGGACTCACCCGCCAAGGGTGGGTTGGAAACCGAAACGAGTCAGTGTTGAAACGTGTCTCATCCTATTCCTGAAGCCAGAATATTCTGGCCATGAGTCATTGTTTCCGCCCATCTTGATTCTTTTGGAAATGGCAGCTCTTGTTCAAAGACCCGGAGGGGTGGGATGTCAATTTCAAGTGGGGTCAACCTGAGTTCTGTAAATCCCAGTAGCGATTTTCCCGC	-	chr1_150551043_150551291_ETS1_HUMAN.H11MO.0.A_center180	ETS	CCGGAAA	180	MECP2	CCCGGAG	271	372	344	462	423	350	2.31462	3.54423	-1.22961	2.46411	-1.08012	-0.149497
chr1_150551043_150551291_ETS1_HUMAN.H11MO.0.A_center180_to_TP53_MA0106.3	chr1_150551043_150551291	CTCACTCCCTTTTTTCCATCTCTCCCCGGACTCACCCGCCAAGGGTGGGTTGGAAACCGAAACGAGTCAGTGTTGAAACGTGTCTCATCCTATTCCTGAAGCCAGAATATTCTGGCCATGAGTCATTGTTTCCGCCCATCTTGATTCTTTTGGAAATGGCAGCTCTTGTTCAACATGCCCGGGCATGTGGATGTCAATTTCAAGTGGGGTCAACCTGAGTTCTGTAAATCCCAGTAGCGATTTTCCCGC	-	chr1_150551043_150551291_ETS1_HUMAN.H11MO.0.A_center180	ETS	AAGACCGGAAAGGGTG	180	P53	ACATGCCCGGGCATGT	733	788	751	4324	3698	4159	4.36825	3.54423	0.824023	2.46411	-1.08012	1.90414
chr1_150551043_150551291_FOSL1_MA0477.1_center122_to_CREB1_MA0018.3	chr1_150551043_150551291	CTCACTCCCTTTTTTCCATCTCTCCCCGGACTCACCCGCCAAGGGTGGGTTGGAAACCGAAACGAGTCAGTGTTGAAACGTGTCTCATCCTATTCCTGAAGCCAGAATATTCTGGCCATGACGTCATGTTTCCGCCCATCTTGATTCTTTTGGAAATGGCAGCTCTTGTTCAAAGACCGGAAAGGGTGGGATGTCAATTTCAAGTGGGGTCAACCTGAGTTCTGTAAATCCCAGTAGCGATTTTCCCGC	-	chr1_150551043_150551291_FOSL1_MA0477.1_center122	AP-1	TGAGTCAT	122	CREB1	TGACGTCA	304	314	298	489	479	435	2.58502	3.54423	-0.959203	0.891084	-2.65314	1.69394
chr1_150551043_150551291_FOSL1_MA0477.1_center122_to_E2F1_HUMAN.H11MO.0.A	chr1_150551043_150551291	CTCACTCCCTTTTTTCCATCTCTCCCCGGACTCACCCGCCAAGGGTGGGTTGGAAACCGAAACGAGTCAGTGTTGAAACGTGTCTCATCCTATTCCTGAAGCCAGAATATTCTGGCCAGGCGGGAATGTTTCCGCCCATCTTGATTCTTTTGGAAATGGCAGCTCTTGTTCAAAGACCGGAAAGGGTGGGATGTCAATTTCAAGTGGGGTCAACCTGAGTTCTGTAAATCCCAGTAGCGATTTTCCCGC	-	chr1_150551043_150551291_FOSL1_MA0477.1_center122	AP-1	TGAGTCAT	122	E2F1	GGCGGGAA	731	787	751	395	339	565	1.06947	3.54423	-2.47476	0.891084	-2.65314	0.178385
chr1_150551043_150551291_FOSL1_MA0477.1_center122_to_EGR1_C2H2_1	chr1_150551043_150551291	CTCACTCCCTTTTTTCCATCTCTCCCCGGACTCACCCGCCAAGGGTGGGTTGGAAACCGAAACGAGTCAGTGTTGAAACGTGTCTCATCCTATTCCTGAAGCCAGAATATTCTGGCACGCCCACGCAGTTTCCGCCCATCTTGATTCTTTTGGAAATGGCAGCTCTTGTTCAAAGACCGGAAAGGGTGGGATGTCAATTTCAAGTGGGGTCAACCTGAGTTCTGTAAATCCCAGTAGCGATTTTCCCGC	-	chr1_150551043_150551291_FOSL1_MA0477.1_center122	AP-1	CATGAGTCATT	122	EGR1	ACGCCCACGCA	806	843	861	584	511	682	1.41503	3.54423	-2.1292	0.891084	-2.65314	0.523947
chr1_150551043_150551291_FOSL1_MA0477.1_center122_to_ETS1_HUMAN.H11MO.0.A	chr1_150551043_150551291	CTCACTCCCTTTTTTCCATCTCTCCCCGGACTCACCCGCCAAGGGTGGGTTGGAAACCGAAACGAGTCAGTGTTGAAACGTGTCTCATCCTATTCCTGAAGCCAGAATATTCTGGCCACCGGAAGTTGTTTCCGCCCATCTTGATTCTTTTGGAAATGGCAGCTCTTGTTCAAAGACCGGAAAGGGTGGGATGTCAATTTCAAGTGGGGTCAACCTGAGTTCTGTAAATCCCAGTAGCGATTTTCCCGC	-	chr1_150551043_150551291_FOSL1_MA0477.1_center122	AP-1	ATGAGTCAT	122	ETS	ACCGGAAGT	244	261	254	233	275	339	2.06732	3.54423	-1.47691	0.891084	-2.65314	1.17624
chr1_150551043_150551291_FOSL1_MA0477.1_center122_to_MECP2_HUMAN.H11MO.0.C	chr1_150551043_150551291	CTCACTCCCTTTTTTCCATCTCTCCCCGGACTCACCCGCCAAGGGTGGGTTGGAAACCGAAACGAGTCAGTGTTGAAACGTGTCTCATCCTATTCCTGAAGCCAGAATATTCTGGCCACCCGGAGTTGTTTCCGCCCATCTTGATTCTTTTGGAAATGGCAGCTCTTGTTCAAAGACCGGAAAGGGTGGGATGTCAATTTCAAGTGGGGTCAACCTGAGTTCTGTAAATCCCAGTAGCGATTTTCCCGC	-	chr1_150551043_150551291_FOSL1_MA0477.1_center122	AP-1	TGAGTCA	122	MECP2	CCCGGAG	258	237	237	99	93	179	0.859754	3.54423	-2.68447	0.891084	-2.65314	-0.03133
chr1_150551043_150551291_FOSL1_MA0477.1_center122_to_TP53_MA0106.3	chr1_150551043_150551291	CTCACTCCCTTTTTTCCATCTCTCCCCGGACTCACCCGCCAAGGGTGGGTTGGAAACCGAAACGAGTCAGTGTTGAAACGTGTCTCATCCTATTCCTGAAGCCAGAATATTCTGACATGCCCGGGCATGTTCCGCCCATCTTGATTCTTTTGGAAATGGCAGCTCTTGTTCAAAGACCGGAAAGGGTGGGATGTCAATTTCAAGTGGGGTCAACCTGAGTTCTGTAAATCCCAGTAGCGATTTTCCCGC	-	chr1_150551043_150551291_FOSL1_MA0477.1_center122	AP-1	GCCATGAGTCATTGTT	122	P53	ACATGCCCGGGCATGT	534	527	482	2257	1754	2608	4.00154	3.54423	0.457308	0.891084	-2.65314	3.11045
chr1_150551043_150551291_TP53_MA0106.3_center86_to_E2F1_HUMAN.H11MO.0.A	chr1_150551043_150551291	CTCACTCCCTTTTTTCCATCTCTCCCCGGACTCACCCGCCAAGGGTGGGTTGGAAACCGAAACGAGTCAGTGTTGAAACGTGGGCGGGAATATTCCTGAAGCCAGAATATTCTGGCCATGAGTCATTGTTTCCGCCCATCTTGATTCTTTTGGAAATGGCAGCTCTTGTTCAAAGACCGGAAAGGGTGGGATGTCAATTTCAAGTGGGGTCAACCTGAGTTCTGTAAATCCCAGTAGCGATTTTCCCGC	-	chr1_150551043_150551291_TP53_MA0106.3_center86	P53	TCTCATCC	86	E2F1	GGCGGGAA	668	713	707	2895	2472	1997	3.81481	3.54423	0.270579	1.21873	-2.3255	2.59608
chr1_150551043_150551291_TP53_MA0106.3_center86_to_EGR1_C2H2_1	chr1_150551043_150551291	CTCACTCCCTTTTTTCCATCTCTCCCCGGACTCACCCGCCAAGGGTGGGTTGGAAACCGAAACGAGTCAGTGTTGAAACGACGCCCACGCAATTCCTGAAGCCAGAATATTCTGGCCATGAGTCATTGTTTCCGCCCATCTTGATTCTTTTGGAAATGGCAGCTCTTGTTCAAAGACCGGAAAGGGTGGGATGTCAATTTCAAGTGGGGTCAACCTGAGTTCTGTAAATCCCAGTAGCGATTTTCCCGC	-	chr1_150551043_150551291_TP53_MA0106.3_center86	P53	TGTCTCATCCT	86	EGR1	ACGCCCACGCA	202	220	200	2090	1770	1546	5.10436	3.54423	1.56014	1.21873	-2.3255	3.88564
chr1_150551043_150551291_TP53_MA0106.3_center86_to_ETS1_HUMAN.H11MO.0.A	chr1_150551043_150551291	CTCACTCCCTTTTTTCCATCTCTCCCCGGACTCACCCGCCAAGGGTGGGTTGGAAACCGAAACGAGTCAGTGTTGAAACGTACCGGAAGTTATTCCTGAAGCCAGAATATTCTGGCCATGAGTCATTGTTTCCGCCCATCTTGATTCTTTTGGAAATGGCAGCTCTTGTTCAAAGACCGGAAAGGGTGGGATGTCAATTTCAAGTGGGGTCAACCTGAGTTCTGTAAATCCCAGTAGCGATTTTCCCGC	-	chr1_150551043_150551291_TP53_MA0106.3_center86	P53	GTCTCATCC	86	ETS	ACCGGAAGT	286	300	300	1483	1311	1096	4.12386	3.54423	0.579632	1.21873	-2.3255	2.90513
chr1_150551043_150551291_TP53_MA0106.3_center86_to_FOSL1_MA0477.1	chr1_150551043_150551291	CTCACTCCCTTTTTTCCATCTCTCCCCGGACTCACCCGCCAAGGGTGGGTTGGAAACCGAAACGAGTCAGTGTTGAAACGTGTGACTCATTATTCCTGAAGCCAGAATATTCTGGCCATGAGTCATTGTTTCCGCCCATCTTGATTCTTTTGGAAATGGCAGCTCTTGTTCAAAGACCGGAAAGGGTGGGATGTCAATTTCAAGTGGGGTCAACCTGAGTTCTGTAAATCCCAGTAGCGATTTTCCCGC	-	chr1_150551043_150551291_TP53_MA0106.3_center86	P53	GTCTCATCC	86	AP-1	GTGACTCAT	315	351	351	2789	2475	2136	4.84966	3.54423	1.30543	1.21873	-2.3255	3.63093
chr1_150551043_150551291_TP53_MA0106.3_center86_to_MAFK_MA0496.2	chr1_150551043_150551291	CTCACTCCCTTTTTTCCATCTCTCCCCGGACTCACCCGCCAAGGGTGGGTTGGAAACCGAAACGAGTCAGTGTTGAAACTGCTGAGTCAGCATTCCTGAAGCCAGAATATTCTGGCCATGAGTCATTGTTTCCGCCCATCTTGATTCTTTTGGAAATGGCAGCTCTTGTTCAAAGACCGGAAAGGGTGGGATGTCAATTTCAAGTGGGGTCAACCTGAGTTCTGTAAATCCCAGTAGCGATTTTCCCGC	-	chr1_150551043_150551291_TP53_MA0106.3_center86	P53	GTGTCTCATCCTA	86	MAF	TGCTGAGTCAGCA	194	193	219	1413	1174	762	4.49175	3.54423	0.947522	1.21873	-2.3255	3.27302
chr1_151547480_151547728_CREB1_MA0018.3_center115_to_E2F1_HUMAN.H11MO.0.A	chr1_151547480_151547728	AAGTAAGGGCTTGGCTCTTGTTCACGGTGAAGTTGGGTTGCAGGGAGGGGAGGGCAGGCCATACAGCCTGTTGCTCCTGTGGTGGCCTGGTCTGGGGAGGAAGCTGGTGCTGGCGGGAAATCTTCCAGCTCTGACTCACCGTGAGCTTGCTCAGGGTGGAGCCCCACCCAAGAGATACCATTTGGGAGGCCGCCATCTCCAGGGAGTTCATTTTCCATGGGGTAATAACCTAAAGAAAAGGCTTTCACA	+	chr1_151547480_151547728_CREB1_MA0018.3_center115	CREB1	GATGTCAG	115	E2F1	GGCGGGAA	284	312	294	431	393	596	2.56176	3.15809	-0.596339	1.633	-1.52509	0.928753
chr1_151547480_151547728_CREB1_MA0018.3_center115_to_EGR1_C2H2_1	chr1_151547480_151547728	AAGTAAGGGCTTGGCTCTTGTTCACGGTGAAGTTGGGTTGCAGGGAGGGGAGGGCAGGCCATACAGCCTGTTGCTCCTGTGGTGGCCTGGTCTGGGGAGGAAGCTGGTGACGCCCACGCATCTTCCAGCTCTGACTCACCGTGAGCTTGCTCAGGGTGGAGCCCCACCCAAGAGATACCATTTGGGAGGCCGCCATCTCCAGGGAGTTCATTTTCCATGGGGTAATAACCTAAAGAAAAGGCTTTCACA	+	chr1_151547480_151547728_CREB1_MA0018.3_center115	CREB1	CTGATGTCAGA	115	EGR1	ACGCCCACGCA	280	299	298	823	691	790	3.33609	3.15809	0.177994	1.633	-1.52509	1.70309
chr1_151547480_151547728_CREB1_MA0018.3_center115_to_ETS1_HUMAN.H11MO.0.A	chr1_151547480_151547728	AAGTAAGGGCTTGGCTCTTGTTCACGGTGAAGTTGGGTTGCAGGGAGGGGAGGGCAGGCCATACAGCCTGTTGCTCCTGTGGTGGCCTGGTCTGGGGAGGAAGCTGGTGCACCGGAAGTATCTTCCAGCTCTGACTCACCGTGAGCTTGCTCAGGGTGGAGCCCCACCCAAGAGATACCATTTGGGAGGCCGCCATCTCCAGGGAGTTCATTTTCCATGGGGTAATAACCTAAAGAAAAGGCTTTCACA	+	chr1_151547480_151547728_CREB1_MA0018.3_center115	CREB1	TGATGTCAG	115	ETS	ACCGGAAGT	463	477	495	1203	1064	1250	3.22905	3.15809	0.0709546	1.633	-1.52509	1.59605
chr1_151547480_151547728_CREB1_MA0018.3_center115_to_FOSL1_MA0477.1	chr1_151547480_151547728	AAGTAAGGGCTTGGCTCTTGTTCACGGTGAAGTTGGGTTGCAGGGAGGGGAGGGCAGGCCATACAGCCTGTTGCTCCTGTGGTGGCCTGGTCTGGGGAGGAAGCTGGTGCGTGACTCATATCTTCCAGCTCTGACTCACCGTGAGCTTGCTCAGGGTGGAGCCCCACCCAAGAGATACCATTTGGGAGGCCGCCATCTCCAGGGAGTTCATTTTCCATGGGGTAATAACCTAAAGAAAAGGCTTTCACA	+	chr1_151547480_151547728_CREB1_MA0018.3_center115	CREB1	TGATGTCAG	115	AP-1	GTGACTCAT	133	137	146	597	510	595	3.97027	3.15809	0.812178	1.633	-1.52509	2.33727
chr1_151547480_151547728_CREB1_MA0018.3_center115_to_MAFK_MA0496.2	chr1_151547480_151547728	AAGTAAGGGCTTGGCTCTTGTTCACGGTGAAGTTGGGTTGCAGGGAGGGGAGGGCAGGCCATACAGCCTGTTGCTCCTGTGGTGGCCTGGTCTGGGGAGGAAGCTGGTTGCTGAGTCAGCACTTCCAGCTCTGACTCACCGTGAGCTTGCTCAGGGTGGAGCCCCACCCAAGAGATACCATTTGGGAGGCCGCCATCTCCAGGGAGTTCATTTTCCATGGGGTAATAACCTAAAGAAAAGGCTTTCACA	+	chr1_151547480_151547728_CREB1_MA0018.3_center115	CREB1	GCTGATGTCAGAT	115	MAF	TGCTGAGTCAGCA	272	259	260	801	705	754	3.46359	3.15809	0.305498	1.633	-1.52509	1.83059
chr1_151547480_151547728_CREB1_MA0018.3_center115_to_MECP2_HUMAN.H11MO.0.C	chr1_151547480_151547728	AAGTAAGGGCTTGGCTCTTGTTCACGGTGAAGTTGGGTTGCAGGGAGGGGAGGGCAGGCCATACAGCCTGTTGCTCCTGTGGTGGCCTGGTCTGGGGAGGAAGCTGGTGCTCCCGGAGGATCTTCCAGCTCTGACTCACCGTGAGCTTGCTCAGGGTGGAGCCCCACCCAAGAGATACCATTTGGGAGGCCGCCATCTCCAGGGAGTTCATTTTCCATGGGGTAATAACCTAAAGAAAAGGCTTTCACA	+	chr1_151547480_151547728_CREB1_MA0018.3_center115	CREB1	GATGTCA	115	MECP2	CCCGGAG	457	509	477	451	382	494	1.79923	3.15809	-1.35886	1.633	-1.52509	0.166229
chr1_151547480_151547728_CREB1_MA0018.3_center115_to_TP53_MA0106.3	chr1_151547480_151547728	AAGTAAGGGCTTGGCTCTTGTTCACGGTGAAGTTGGGTTGCAGGGAGGGGAGGGCAGGCCATACAGCCTGTTGCTCCTGTGGTGGCCTGGTCTGGGGAGGAAGCTGGACATGCCCGGGCATGTTCCAGCTCTGACTCACCGTGAGCTTGCTCAGGGTGGAGCCCCACCCAAGAGATACCATTTGGGAGGCCGCCATCTCCAGGGAGTTCATTTTCCATGGGGTAATAACCTAAAGAAAAGGCTTTCACA	+	chr1_151547480_151547728_CREB1_MA0018.3_center115	CREB1	TGCTGATGTCAGATCT	115	P53	ACATGCCCGGGCATGT	213	203	176	1844	1480	2197	5.11905	3.15809	1.96096	1.633	-1.52509	3.48605
chr1_15679017_15679265_ETS1_HUMAN.H11MO.0.A_center151_to_CREB1_MA0018.3	chr1_15679017_15679265	GAGAAAGATCTCAAAGAACAAAGCACCCACTGGGGACAGAGGTGAGAACCATGGCATGCCCACCATGGTGAGAACCCGGGAGCCATATCTTAGTCACGTGTGTAAAGGAGAGAGTGAGTCATCATTCAAGACTTCAGGGCTGGTGTTTGACGTCAGACATGCTGGTGAATGGTTGGGTCCTGGTGTTTGGCATTGAGTTACTAAATAAACTGGCATGTGCTGGCACCGATGCTGGCTTTTGTTGGAAGT	-	chr1_15679017_15679265_ETS1_HUMAN.H11MO.0.A_center151	ETS	CAGGAAGT	151	CREB1	TGACGTCA	258	202	266	1099	1132	1130	4.16412	4.69908	-0.534959	2.55043	-2.14865	1.61369
chr1_15679017_15679265_ETS1_HUMAN.H11MO.0.A_center151_to_E2F1_HUMAN.H11MO.0.A	chr1_15679017_15679265	GAGAAAGATCTCAAAGAACAAAGCACCCACTGGGGACAGAGGTGAGAACCATGGCATGCCCACCATGGTGAGAACCCGGGAGCCATATCTTAGTCACGTGTGTAAAGGAGAGAGTGAGTCATCATTCAAGACTTCAGGGCTGGTGTTGGCGGGAAGACATGCTGGTGAATGGTTGGGTCCTGGTGTTTGGCATTGAGTTACTAAATAAACTGGCATGTGCTGGCACCGATGCTGGCTTTTGTTGGAAGT	-	chr1_15679017_15679265_ETS1_HUMAN.H11MO.0.A_center151	ETS	CAGGAAGT	151	E2F1	GGCGGGAA	181	189	198	226	193	356	2.30448	4.69908	-2.3946	2.55043	-2.14865	-0.24595
chr1_15679017_15679265_ETS1_HUMAN.H11MO.0.A_center151_to_EGR1_C2H2_1	chr1_15679017_15679265	GAGAAAGATCTCAAAGAACAAAGCACCCACTGGGGACAGAGGTGAGAACCATGGCATGCCCACCATGGTGAGAACCCGGGAGCCATATCTTAGTCACGTGTGTAAAGGAGAGAGTGAGTCATCATTCAAGACTTCAGGGCTGGTGACGCCCACGCAACATGCTGGTGAATGGTTGGGTCCTGGTGTTTGGCATTGAGTTACTAAATAAACTGGCATGTGCTGGCACCGATGCTGGCTTTTGTTGGAAGT	-	chr1_15679017_15679265_ETS1_HUMAN.H11MO.0.A_center151	ETS	TTCAGGAAGTG	151	EGR1	ACGCCCACGCA	278	329	292	1048	972	1277	3.78944	4.69908	-0.909641	2.55043	-2.14865	1.23901
chr1_15679017_15679265_ETS1_HUMAN.H11MO.0.A_center151_to_FOSL1_MA0477.1	chr1_15679017_15679265	GAGAAAGATCTCAAAGAACAAAGCACCCACTGGGGACAGAGGTGAGAACCATGGCATGCCCACCATGGTGAGAACCCGGGAGCCATATCTTAGTCACGTGTGTAAAGGAGAGAGTGAGTCATCATTCAAGACTTCAGGGCTGGTGTGTGACTCATGACATGCTGGTGAATGGTTGGGTCCTGGTGTTTGGCATTGAGTTACTAAATAAACTGGCATGTGCTGGCACCGATGCTGGCTTTTGTTGGAAGT	-	chr1_15679017_15679265_ETS1_HUMAN.H11MO.0.A_center151	ETS	TCAGGAAGT	151	AP-1	GTGACTCAT	142	167	180	770	687	775	4.1346	4.69908	-0.564482	2.55043	-2.14865	1.58417
chr1_15679017_15679265_ETS1_HUMAN.H11MO.0.A_center151_to_MAFK_MA0496.2	chr1_15679017_15679265	GAGAAAGATCTCAAAGAACAAAGCACCCACTGGGGACAGAGGTGAGAACCATGGCATGCCCACCATGGTGAGAACCCGGGAGCCATATCTTAGTCACGTGTGTAAAGGAGAGAGTGAGTCATCATTCAAGACTTCAGGGCTGGTTGCTGAGTCAGCACATGCTGGTGAATGGTTGGGTCCTGGTGTTTGGCATTGAGTTACTAAATAAACTGGCATGTGCTGGCACCGATGCTGGCTTTTGTTGGAAGT	-	chr1_15679017_15679265_ETS1_HUMAN.H11MO.0.A_center151	ETS	GTTCAGGAAGTGA	151	MAF	TGCTGAGTCAGCA	390	394	388	848	752	897	3.02279	4.69908	-1.67629	2.55043	-2.14865	0.472358
chr1_15679017_15679265_ETS1_HUMAN.H11MO.0.A_center151_to_MECP2_HUMAN.H11MO.0.C	chr1_15679017_15679265	GAGAAAGATCTCAAAGAACAAAGCACCCACTGGGGACAGAGGTGAGAACCATGGCATGCCCACCATGGTGAGAACCCGGGAGCCATATCTTAGTCACGTGTGTAAAGGAGAGAGTGAGTCATCATTCAAGACTTCAGGGCTGGTGTTCCCGGAGTGACATGCTGGTGAATGGTTGGGTCCTGGTGTTTGGCATTGAGTTACTAAATAAACTGGCATGTGCTGGCACCGATGCTGGCTTTTGTTGGAAGT	-	chr1_15679017_15679265_ETS1_HUMAN.H11MO.0.A_center151	ETS	CAGGAAG	151	MECP2	CCCGGAG	306	297	299	551	504	695	2.85955	4.69908	-1.83953	2.55043	-2.14865	0.309117
chr1_15679017_15679265_ETS1_HUMAN.H11MO.0.A_center151_to_TP53_MA0106.3	chr1_15679017_15679265	GAGAAAGATCTCAAAGAACAAAGCACCCACTGGGGACAGAGGTGAGAACCATGGCATGCCCACCATGGTGAGAACCCGGGAGCCATATCTTAGTCACGTGTGTAAAGGAGAGAGTGAGTCATCATTCAAGACTTCAGGGCTGGACATGCCCGGGCATGTTGCTGGTGAATGGTTGGGTCCTGGTGTTTGGCATTGAGTTACTAAATAAACTGGCATGTGCTGGCACCGATGCTGGCTTTTGTTGGAAGT	-	chr1_15679017_15679265_ETS1_HUMAN.H11MO.0.A_center151	ETS	TGTTCAGGAAGTGACA	151	P53	ACATGCCCGGGCATGT	189	171	214	1741	1443	2580	5.19212	4.69908	0.493042	2.55043	-2.14865	2.64169
chr1_158985282_158985530_TP53_MA0106.3_center183_to_E2F1_HUMAN.H11MO.0.A	chr1_158985282_158985530	ATATCTTTACCTGGGGAATGTGACCTAGCAGTCTCCATCATGAAAACATTAGTTTTTAAAACAAAATGATCGGAGAACCGCATTGGGAAAGGGTTAACTGAAGCACATGGAGTTCAGAGAACAGGAAGCATGTGCTCAGTGCACAGGGGAGGAGTGAGGAAAGTGCTGAGGAGCATGAGGGCGGGAATGTTCCTGTCTTGTGACTGCTGGTCTCCTTAAGGCCAGGCTGGGCTAATGCAGTAGAGCTAG	+	chr1_158985282_158985530_TP53_MA0106.3_center183	P53	TCAGTGCT	183	E2F1	GGCGGGAA	125	163	158	92	51	146	1.19394	2.93877	-1.74483	0.746404	-2.19236	0.447531
chr1_158985282_158985530_TP53_MA0106.3_center183_to_EGR1_C2H2_1	chr1_158985282_158985530	ATATCTTTACCTGGGGAATGTGACCTAGCAGTCTCCATCATGAAAACATTAGTTTTTAAAACAAAATGATCGGAGAACCGCATTGGGAAAGGGTTAACTGAAGCACATGGAGTTCAGAGAACAGGAAGCATGTGCTCAGTGCACAGGGGAGGAGTGAGGAAAGTGCTGAGGAGCATGACGCCCACGCAGTTCCTGTCTTGTGACTGCTGGTCTCCTTAAGGCCAGGCTGGGCTAATGCAGTAGAGCTAG	+	chr1_158985282_158985530_TP53_MA0106.3_center183	P53	AGTCAGTGCTT	183	EGR1	ACGCCCACGCA	516	512	525	668	535	1141	2.42646	2.93877	-0.512305	0.746404	-2.19236	1.68006
chr1_158985282_158985530_TP53_MA0106.3_center183_to_ETS1_HUMAN.H11MO.0.A	chr1_158985282_158985530	ATATCTTTACCTGGGGAATGTGACCTAGCAGTCTCCATCATGAAAACATTAGTTTTTAAAACAAAATGATCGGAGAACCGCATTGGGAAAGGGTTAACTGAAGCACATGGAGTTCAGAGAACAGGAAGCATGTGCTCAGTGCACAGGGGAGGAGTGAGGAAAGTGCTGAGGAGCATGAACCGGAAGTTGTTCCTGTCTTGTGACTGCTGGTCTCCTTAAGGCCAGGCTGGGCTAATGCAGTAGAGCTAG	+	chr1_158985282_158985530_TP53_MA0106.3_center183	P53	GTCAGTGCT	183	ETS	ACCGGAAGT	83	80	65	138	90	277	2.93022	2.93877	-0.00854308	0.746404	-2.19236	2.18382
chr1_158985282_158985530_TP53_MA0106.3_center183_to_FOSL1_MA0477.1	chr1_158985282_158985530	ATATCTTTACCTGGGGAATGTGACCTAGCAGTCTCCATCATGAAAACATTAGTTTTTAAAACAAAATGATCGGAGAACCGCATTGGGAAAGGGTTAACTGAAGCACATGGAGTTCAGAGAACAGGAAGCATGTGCTCAGTGCACAGGGGAGGAGTGAGGAAAGTGCTGAGGAGCATGAGTGACTCATTGTTCCTGTCTTGTGACTGCTGGTCTCCTTAAGGCCAGGCTGGGCTAATGCAGTAGAGCTAG	+	chr1_158985282_158985530_TP53_MA0106.3_center183	P53	GTCAGTGCT	183	AP-1	GTGACTCAT	92	83	96	213	143	337	3.18363	2.93877	0.244865	0.746404	-2.19236	2.43723
chr1_158985282_158985530_TP53_MA0106.3_center183_to_MAFK_MA0496.2	chr1_158985282_158985530	ATATCTTTACCTGGGGAATGTGACCTAGCAGTCTCCATCATGAAAACATTAGTTTTTAAAACAAAATGATCGGAGAACCGCATTGGGAAAGGGTTAACTGAAGCACATGGAGTTCAGAGAACAGGAAGCATGTGCTCAGTGCACAGGGGAGGAGTGAGGAAAGTGCTGAGGAGCATTGCTGAGTCAGCATTCCTGTCTTGTGACTGCTGGTCTCCTTAAGGCCAGGCTGGGCTAATGCAGTAGAGCTAG	+	chr1_158985282_158985530_TP53_MA0106.3_center183	P53	GAGTCAGTGCTTG	183	MAF	TGCTGAGTCAGCA	193	154	211	169	120	291	1.87527	2.93877	-1.0635	0.746404	-2.19236	1.12886
chr1_161123677_161123925_E2F1_HUMAN.H11MO.0.A_center117_to_CREB1_MA0018.3	chr1_161123677_161123925	AGAGGTCTTACAGCAACCCAACGTCTCATCTTCCCATAGTAAAGATGACGGCGCCTTGAGGTAAGCTACAGGCAACACCACTTCCGCGTTTCTCTTGCGCCCTGGTCCAAGATTGACGTCAAAGCCACGCGACGTGTTGTGTCTGAGATCCCGGTGCTGAAGACTAACGCCGGACCCCGAGATCGTGAGTTGTGGGTGCAGCGACTGAAGGAGGAATATCAGTCCCTTATCCGGGTTAGTTGTGTTTCT	+	chr1_161123677_161123925_E2F1_HUMAN.H11MO.0.A_center117	E2F1	GGCGGATG	117	CREB1	TGACGTCA	169	178	178	193	155	366	2.25995	3.60981	-1.34986	1.77845	-1.83136	0.481498
chr1_161123677_161123925_E2F1_HUMAN.H11MO.0.A_center117_to_EGR1_C2H2_1	chr1_161123677_161123925	AGAGGTCTTACAGCAACCCAACGTCTCATCTTCCCATAGTAAAGATGACGGCGCCTTGAGGTAAGCTACAGGCAACACCACTTCCGCGTTTCTCTTGCGCCCTGGTCCAAGACGCCCACGCAAGCCACGCGACGTGTTGTGTCTGAGATCCCGGTGCTGAAGACTAACGCCGGACCCCGAGATCGTGAGTTGTGGGTGCAGCGACTGAAGGAGGAATATCAGTCCCTTATCCGGGTTAGTTGTGTTTCT	+	chr1_161123677_161123925_E2F1_HUMAN.H11MO.0.A_center117	E2F1	ATGGCGGATGA	117	EGR1	ACGCCCACGCA	400	444	458	319	253	534	1.60264	3.60981	-2.00717	1.77845	-1.83136	-0.175815
chr1_161123677_161123925_E2F1_HUMAN.H11MO.0.A_center117_to_ETS1_HUMAN.H11MO.0.A	chr1_161123677_161123925	AGAGGTCTTACAGCAACCCAACGTCTCATCTTCCCATAGTAAAGATGACGGCGCCTTGAGGTAAGCTACAGGCAACACCACTTCCGCGTTTCTCTTGCGCCCTGGTCCAAGAACCGGAAGTAAGCCACGCGACGTGTTGTGTCTGAGATCCCGGTGCTGAAGACTAACGCCGGACCCCGAGATCGTGAGTTGTGGGTGCAGCGACTGAAGGAGGAATATCAGTCCCTTATCCGGGTTAGTTGTGTTTCT	+	chr1_161123677_161123925_E2F1_HUMAN.H11MO.0.A_center117	E2F1	TGGCGGATG	117	ETS	ACCGGAAGT	281	303	279	266	240	396	1.93556	3.60981	-1.67425	1.77845	-1.83136	0.157111
chr1_161123677_161123925_E2F1_HUMAN.H11MO.0.A_center117_to_FOSL1_MA0477.1	chr1_161123677_161123925	AGAGGTCTTACAGCAACCCAACGTCTCATCTTCCCATAGTAAAGATGACGGCGCCTTGAGGTAAGCTACAGGCAACACCACTTCCGCGTTTCTCTTGCGCCCTGGTCCAAGAGTGACTCATAAGCCACGCGACGTGTTGTGTCTGAGATCCCGGTGCTGAAGACTAACGCCGGACCCCGAGATCGTGAGTTGTGGGTGCAGCGACTGAAGGAGGAATATCAGTCCCTTATCCGGGTTAGTTGTGTTTCT	+	chr1_161123677_161123925_E2F1_HUMAN.H11MO.0.A_center117	E2F1	TGGCGGATG	117	AP-1	GTGACTCAT	314	293	322	212	161	318	1.42364	3.60981	-2.18617	1.77845	-1.83136	-0.354807
chr1_161123677_161123925_E2F1_HUMAN.H11MO.0.A_center117_to_MAFK_MA0496.2	chr1_161123677_161123925	AGAGGTCTTACAGCAACCCAACGTCTCATCTTCCCATAGTAAAGATGACGGCGCCTTGAGGTAAGCTACAGGCAACACCACTTCCGCGTTTCTCTTGCGCCCTGGTCCAATGCTGAGTCAGCAGCCACGCGACGTGTTGTGTCTGAGATCCCGGTGCTGAAGACTAACGCCGGACCCCGAGATCGTGAGTTGTGGGTGCAGCGACTGAAGGAGGAATATCAGTCCCTTATCCGGGTTAGTTGTGTTTCT	+	chr1_161123677_161123925_E2F1_HUMAN.H11MO.0.A_center117	E2F1	GATGGCGGATGAA	117	MAF	TGCTGAGTCAGCA	743	745	785	478	398	737	1.36199	3.60981	-2.24782	1.77845	-1.83136	-0.416461
chr1_161123677_161123925_E2F1_HUMAN.H11MO.0.A_center117_to_MECP2_HUMAN.H11MO.0.C	chr1_161123677_161123925	AGAGGTCTTACAGCAACCCAACGTCTCATCTTCCCATAGTAAAGATGACGGCGCCTTGAGGTAAGCTACAGGCAACACCACTTCCGCGTTTCTCTTGCGCCCTGGTCCAAGATCCCGGAGGAAGCCACGCGACGTGTTGTGTCTGAGATCCCGGTGCTGAAGACTAACGCCGGACCCCGAGATCGTGAGTTGTGGGTGCAGCGACTGAAGGAGGAATATCAGTCCCTTATCCGGGTTAGTTGTGTTTCT	+	chr1_161123677_161123925_E2F1_HUMAN.H11MO.0.A_center117	E2F1	GGCGGAT	117	MECP2	CCCGGAG	299	319	300	252	165	283	1.49494	3.60981	-2.11487	1.77845	-1.83136	-0.283511
chr1_161123677_161123925_E2F1_HUMAN.H11MO.0.A_center117_to_TP53_MA0106.3	chr1_161123677_161123925	AGAGGTCTTACAGCAACCCAACGTCTCATCTTCCCATAGTAAAGATGACGGCGCCTTGAGGTAAGCTACAGGCAACACCACTTCCGCGTTTCTCTTGCGCCCTGGTCCAACATGCCCGGGCATGTCACGCGACGTGTTGTGTCTGAGATCCCGGTGCTGAAGACTAACGCCGGACCCCGAGATCGTGAGTTGTGGGTGCAGCGACTGAAGGAGGAATATCAGTCCCTTATCCGGGTTAGTTGTGTTTCT	+	chr1_161123677_161123925_E2F1_HUMAN.H11MO.0.A_center117	E2F1	AGATGGCGGATGAAGC	117	P53	ACATGCCCGGGCATGT	409	419	447	1470	1101	1905	3.6896	3.60981	0.0797837	1.77845	-1.83136	1.91114
chr1_163005546_163005794_E2F1_HUMAN.H11MO.0.A_center155_to_CREB1_MA0018.3	chr1_163005546_163005794	GCATTTCCCACACTGAGGTCAAGATACTTCTATTGCCAAGGAAGGGTAAATGGATAGGAGGAGGCAAATTCTCCAGGGATGAGGATAGTGCCGGAAGTGGAGGTAAGTGAATTATGGGCTGATGATTCAGCAGCAAATCACCCATGGAAATTGACGTCACACCTCCGGAGGCTGATTATTTTTCAAGGAACTTTGAGGGTCAAGACAACCACCTATGTTCCCAGGAGGTGGTAGAAAAATGTGCGTCTC	-	chr1_163005546_163005794_E2F1_HUMAN.H11MO.0.A_center155	E2F1	GTCCCACC	155	CREB1	TGACGTCA	311	334	353	1434	1287	1430	4.00192	2.8577	1.14422	1.47244	-1.38526	2.52949
chr1_163005546_163005794_E2F1_HUMAN.H11MO.0.A_center155_to_EGR1_C2H2_1	chr1_163005546_163005794	GCATTTCCCACACTGAGGTCAAGATACTTCTATTGCCAAGGAAGGGTAAATGGATAGGAGGAGGCAAATTCTCCAGGGATGAGGATAGTGCCGGAAGTGGAGGTAAGTGAATTATGGGCTGATGATTCAGCAGCAAATCACCCATGGAAACGCCCACGCAACCTCCGGAGGCTGATTATTTTTCAAGGAACTTTGAGGGTCAAGACAACCACCTATGTTCCCAGGAGGTGGTAGAAAAATGTGCGTCTC	-	chr1_163005546_163005794_E2F1_HUMAN.H11MO.0.A_center155	E2F1	ATGTCCCACCC	155	EGR1	ACGCCCACGCA	82	95	75	304	247	298	3.68398	2.8577	0.826276	1.47244	-1.38526	2.21154
chr1_163005546_163005794_E2F1_HUMAN.H11MO.0.A_center155_to_ETS1_HUMAN.H11MO.0.A	chr1_163005546_163005794	GCATTTCCCACACTGAGGTCAAGATACTTCTATTGCCAAGGAAGGGTAAATGGATAGGAGGAGGCAAATTCTCCAGGGATGAGGATAGTGCCGGAAGTGGAGGTAAGTGAATTATGGGCTGATGATTCAGCAGCAAATCACCCATGGAAAACCGGAAGTCACCTCCGGAGGCTGATTATTTTTCAAGGAACTTTGAGGGTCAAGACAACCACCTATGTTCCCAGGAGGTGGTAGAAAAATGTGCGTCTC	-	chr1_163005546_163005794_E2F1_HUMAN.H11MO.0.A_center155	E2F1	TGTCCCACC	155	ETS	ACCGGAAGT	97	103	109	170	128	222	2.62553	2.8577	-0.232173	1.47244	-1.38526	1.15309
chr1_163005546_163005794_E2F1_HUMAN.H11MO.0.A_center155_to_FOSL1_MA0477.1	chr1_163005546_163005794	GCATTTCCCACACTGAGGTCAAGATACTTCTATTGCCAAGGAAGGGTAAATGGATAGGAGGAGGCAAATTCTCCAGGGATGAGGATAGTGCCGGAAGTGGAGGTAAGTGAATTATGGGCTGATGATTCAGCAGCAAATCACCCATGGAAAGTGACTCATCACCTCCGGAGGCTGATTATTTTTCAAGGAACTTTGAGGGTCAAGACAACCACCTATGTTCCCAGGAGGTGGTAGAAAAATGTGCGTCTC	-	chr1_163005546_163005794_E2F1_HUMAN.H11MO.0.A_center155	E2F1	TGTCCCACC	155	AP-1	GTGACTCAT	206	198	184	1027	917	1185	4.32813	2.8577	1.47043	1.47244	-1.38526	2.85569
chr1_163005546_163005794_E2F1_HUMAN.H11MO.0.A_center155_to_MAFK_MA0496.2	chr1_163005546_163005794	GCATTTCCCACACTGAGGTCAAGATACTTCTATTGCCAAGGAAGGGTAAATGGATAGGAGGAGGCAAATTCTCCAGGGATGAGGATAGTGCCGGAAGTGGAGGTAAGTGAATTATGGGCTGATGATTCAGCAGCAAATCACCCATGGATGCTGAGTCAGCACCTCCGGAGGCTGATTATTTTTCAAGGAACTTTGAGGGTCAAGACAACCACCTATGTTCCCAGGAGGTGGTAGAAAAATGTGCGTCTC	-	chr1_163005546_163005794_E2F1_HUMAN.H11MO.0.A_center155	E2F1	AATGTCCCACCCA	155	MAF	TGCTGAGTCAGCA	555	608	541	1005	903	1261	2.7992	2.8577	-0.0584985	1.47244	-1.38526	1.32677
chr1_163005546_163005794_E2F1_HUMAN.H11MO.0.A_center155_to_MECP2_HUMAN.H11MO.0.C	chr1_163005546_163005794	GCATTTCCCACACTGAGGTCAAGATACTTCTATTGCCAAGGAAGGGTAAATGGATAGGAGGAGGCAAATTCTCCAGGGATGAGGATAGTGCCGGAAGTGGAGGTAAGTGAATTATGGGCTGATGATTCAGCAGCAAATCACCCATGGAAATCCCGGAGCCACCTCCGGAGGCTGATTATTTTTCAAGGAACTTTGAGGGTCAAGACAACCACCTATGTTCCCAGGAGGTGGTAGAAAAATGTGCGTCTC	-	chr1_163005546_163005794_E2F1_HUMAN.H11MO.0.A_center155	E2F1	GTCCCAC	155	MECP2	CCCGGAG	181	169	172	161	190	208	2.02379	2.8577	-0.833914	1.47244	-1.38526	0.551351
chr1_163005546_163005794_E2F1_HUMAN.H11MO.0.A_center155_to_TP53_MA0106.3	chr1_163005546_163005794	GCATTTCCCACACTGAGGTCAAGATACTTCTATTGCCAAGGAAGGGTAAATGGATAGGAGGAGGCAAATTCTCCAGGGATGAGGATAGTGCCGGAAGTGGAGGTAAGTGAATTATGGGCTGATGATTCAGCAGCAAATCACCCATGGACATGCCCGGGCATGTTCCGGAGGCTGATTATTTTTCAAGGAACTTTGAGGGTCAAGACAACCACCTATGTTCCCAGGAGGTGGTAGAAAAATGTGCGTCTC	-	chr1_163005546_163005794_E2F1_HUMAN.H11MO.0.A_center155	E2F1	AAATGTCCCACCCACC	155	P53	ACATGCCCGGGCATGT	182	173	178	466	384	769	3.44481	2.8577	0.587105	1.47244	-1.38526	1.97237
chr1_163005546_163005794_ETS1_HUMAN.H11MO.0.A_center94_to_CREB1_MA0018.3	chr1_163005546_163005794	GCATTTCCCACACTGAGGTCAAGATACTTCTATTGCCAAGGAAGGGTAAATGGATAGGAGGAGGCAAATTCTCCAGGGATGAGGATAGTGTGACGTCAGGAGGTAAGTGAATTATGGGCTGATGATTCAGCAGCAAATCACCCATGGAAATGTCCCACCCACCTCCGGAGGCTGATTATTTTTCAAGGAACTTTGAGGGTCAAGACAACCACCTATGTTCCCAGGAGGTGGTAGAAAAATGTGCGTCTC	-	chr1_163005546_163005794_ETS1_HUMAN.H11MO.0.A_center94	ETS	CCGGAAGT	94	CREB1	TGACGTCA	155	186	183	370	372	430	3.09292	2.8577	0.235219	0.973665	-1.88404	2.11925
chr1_163005546_163005794_ETS1_HUMAN.H11MO.0.A_center94_to_EGR1_C2H2_1	chr1_163005546_163005794	GCATTTCCCACACTGAGGTCAAGATACTTCTATTGCCAAGGAAGGGTAAATGGATAGGAGGAGGCAAATTCTCCAGGGATGAGGATAGACGCCCACGCAGAGGTAAGTGAATTATGGGCTGATGATTCAGCAGCAAATCACCCATGGAAATGTCCCACCCACCTCCGGAGGCTGATTATTTTTCAAGGAACTTTGAGGGTCAAGACAACCACCTATGTTCCCAGGAGGTGGTAGAAAAATGTGCGTCTC	-	chr1_163005546_163005794_ETS1_HUMAN.H11MO.0.A_center94	ETS	TGCCGGAAGTG	94	EGR1	ACGCCCACGCA	162	192	159	243	221	294	2.47223	2.8577	-0.385471	0.973665	-1.88404	1.49856
chr1_163005546_163005794_ETS1_HUMAN.H11MO.0.A_center94_to_FOSL1_MA0477.1	chr1_163005546_163005794	GCATTTCCCACACTGAGGTCAAGATACTTCTATTGCCAAGGAAGGGTAAATGGATAGGAGGAGGCAAATTCTCCAGGGATGAGGATAGTGTGACTCATGGAGGTAAGTGAATTATGGGCTGATGATTCAGCAGCAAATCACCCATGGAAATGTCCCACCCACCTCCGGAGGCTGATTATTTTTCAAGGAACTTTGAGGGTCAAGACAACCACCTATGTTCCCAGGAGGTGGTAGAAAAATGTGCGTCTC	-	chr1_163005546_163005794_ETS1_HUMAN.H11MO.0.A_center94	ETS	GCCGGAAGT	94	AP-1	GTGACTCAT	90	115	89	382	343	449	3.91264	2.8577	1.05494	0.973665	-1.88404	2.93898
chr1_163005546_163005794_ETS1_HUMAN.H11MO.0.A_center94_to_MAFK_MA0496.2	chr1_163005546_163005794	GCATTTCCCACACTGAGGTCAAGATACTTCTATTGCCAAGGAAGGGTAAATGGATAGGAGGAGGCAAATTCTCCAGGGATGAGGATATGCTGAGTCAGCAAGGTAAGTGAATTATGGGCTGATGATTCAGCAGCAAATCACCCATGGAAATGTCCCACCCACCTCCGGAGGCTGATTATTTTTCAAGGAACTTTGAGGGTCAAGACAACCACCTATGTTCCCAGGAGGTGGTAGAAAAATGTGCGTCTC	-	chr1_163005546_163005794_ETS1_HUMAN.H11MO.0.A_center94	ETS	GTGCCGGAAGTGG	94	MAF	TGCTGAGTCAGCA	157	237	193	262	228	340	2.39632	2.8577	-0.461383	0.973665	-1.88404	1.42265
chr1_163005546_163005794_ETS1_HUMAN.H11MO.0.A_center94_to_MECP2_HUMAN.H11MO.0.C	chr1_163005546_163005794	GCATTTCCCACACTGAGGTCAAGATACTTCTATTGCCAAGGAAGGGTAAATGGATAGGAGGAGGCAAATTCTCCAGGGATGAGGATAGTGCCCGGAGTGGAGGTAAGTGAATTATGGGCTGATGATTCAGCAGCAAATCACCCATGGAAATGTCCCACCCACCTCCGGAGGCTGATTATTTTTCAAGGAACTTTGAGGGTCAAGACAACCACCTATGTTCCCAGGAGGTGGTAGAAAAATGTGCGTCTC	-	chr1_163005546_163005794_ETS1_HUMAN.H11MO.0.A_center94	ETS	CCGGAAG	94	MECP2	CCCGGAG	345	363	357	169	176	310	1.15005	2.8577	-1.70765	0.973665	-1.88404	0.176388
chr1_163005546_163005794_ETS1_HUMAN.H11MO.0.A_center94_to_TP53_MA0106.3	chr1_163005546_163005794	GCATTTCCCACACTGAGGTCAAGATACTTCTATTGCCAAGGAAGGGTAAATGGATAGGAGGAGGCAAATTCTCCAGGGATGAGGATACATGCCCGGGCATGTGTAAGTGAATTATGGGCTGATGATTCAGCAGCAAATCACCCATGGAAATGTCCCACCCACCTCCGGAGGCTGATTATTTTTCAAGGAACTTTGAGGGTCAAGACAACCACCTATGTTCCCAGGAGGTGGTAGAAAAATGTGCGTCTC	-	chr1_163005546_163005794_ETS1_HUMAN.H11MO.0.A_center94	ETS	AGTGCCGGAAGTGGAG	94	P53	ACATGCCCGGGCATGT	494	523	551	4931	4150	6172	5.18081	2.8577	2.32311	0.973665	-1.88404	4.20715
chr1_163005546_163005794_MAFK_MA0496.2_center126_to_E2F1_HUMAN.H11MO.0.A	chr1_163005546_163005794	GCATTTCCCACACTGAGGTCAAGATACTTCTATTGCCAAGGAAGGGTAAATGGATAGGAGGAGGCAAATTCTCCAGGGATGAGGATAGTGCCGGAAGTGGAGGTAAGTGAATTATGGGCTGAGGCGGGAACAGCAAATCACCCATGGAAATGTCCCACCCACCTCCGGAGGCTGATTATTTTTCAAGGAACTTTGAGGGTCAAGACAACCACCTATGTTCCCAGGAGGTGGTAGAAAAATGTGCGTCTC	-	chr1_163005546_163005794_MAFK_MA0496.2_center126	MAF	TGATTCAG	126	E2F1	GGCGGGAA	286	246	246	38	41	99	-0.328056	2.8577	-3.18576	0.00874431	-2.84896	-0.3368
chr1_163005546_163005794_MAFK_MA0496.2_center126_to_EGR1_C2H2_1	chr1_163005546_163005794	GCATTTCCCACACTGAGGTCAAGATACTTCTATTGCCAAGGAAGGGTAAATGGATAGGAGGAGGCAAATTCTCCAGGGATGAGGATAGTGCCGGAAGTGGAGGTAAGTGAATTATGGGCTACGCCCACGCAAGCAAATCACCCATGGAAATGTCCCACCCACCTCCGGAGGCTGATTATTTTTCAAGGAACTTTGAGGGTCAAGACAACCACCTATGTTCCCAGGAGGTGGTAGAAAAATGTGCGTCTC	-	chr1_163005546_163005794_MAFK_MA0496.2_center126	MAF	GATGATTCAGC	126	EGR1	ACGCCCACGCA	276	286	275	95	89	163	0.579823	2.8577	-2.27788	0.00874431	-2.84896	0.571079
chr1_163005546_163005794_MAFK_MA0496.2_center126_to_ETS1_HUMAN.H11MO.0.A	chr1_163005546_163005794	GCATTTCCCACACTGAGGTCAAGATACTTCTATTGCCAAGGAAGGGTAAATGGATAGGAGGAGGCAAATTCTCCAGGGATGAGGATAGTGCCGGAAGTGGAGGTAAGTGAATTATGGGCTGACCGGAAGTCAGCAAATCACCCATGGAAATGTCCCACCCACCTCCGGAGGCTGATTATTTTTCAAGGAACTTTGAGGGTCAAGACAACCACCTATGTTCCCAGGAGGTGGTAGAAAAATGTGCGTCTC	-	chr1_163005546_163005794_MAFK_MA0496.2_center126	MAF	ATGATTCAG	126	ETS	ACCGGAAGT	96	95	92	47	28	86	0.994293	2.8577	-1.86341	0.00874431	-2.84896	0.985549
chr1_163005546_163005794_MAFK_MA0496.2_center126_to_MECP2_HUMAN.H11MO.0.C	chr1_163005546_163005794	GCATTTCCCACACTGAGGTCAAGATACTTCTATTGCCAAGGAAGGGTAAATGGATAGGAGGAGGCAAATTCTCCAGGGATGAGGATAGTGCCGGAAGTGGAGGTAAGTGAATTATGGGCTGACCCGGAGGCAGCAAATCACCCATGGAAATGTCCCACCCACCTCCGGAGGCTGATTATTTTTCAAGGAACTTTGAGGGTCAAGACAACCACCTATGTTCCCAGGAGGTGGTAGAAAAATGTGCGTCTC	-	chr1_163005546_163005794_MAFK_MA0496.2_center126	MAF	TGATTCA	126	MECP2	CCCGGAG	243	270	272	67	65	118	0.200321	2.8577	-2.65738	0.00874431	-2.84896	0.191577
chr1_163005546_163005794_MAFK_MA0496.2_center126_to_TP53_MA0106.3	chr1_163005546_163005794	GCATTTCCCACACTGAGGTCAAGATACTTCTATTGCCAAGGAAGGGTAAATGGATAGGAGGAGGCAAATTCTCCAGGGATGAGGATAGTGCCGGAAGTGGAGGTAAGTGAATTATGGGACATGCCCGGGCATGTAAATCACCCATGGAAATGTCCCACCCACCTCCGGAGGCTGATTATTTTTCAAGGAACTTTGAGGGTCAAGACAACCACCTATGTTCCCAGGAGGTGGTAGAAAAATGTGCGTCTC	-	chr1_163005546_163005794_MAFK_MA0496.2_center126	MAF	CTGATGATTCAGCAGC	126	P53	ACATGCCCGGGCATGT	202	170	187	415	342	688	3.20968	2.8577	0.351974	0.00874431	-2.84896	3.20093
chr1_163005546_163005794_MECP2_HUMAN.H11MO.0.C_center167_to_CREB1_MA0018.3	chr1_163005546_163005794	GCATTTCCCACACTGAGGTCAAGATACTTCTATTGCCAAGGAAGGGTAAATGGATAGGAGGAGGCAAATTCTCCAGGGATGAGGATAGTGCCGGAAGTGGAGGTAAGTGAATTATGGGCTGATGATTCAGCAGCAAATCACCCATGGAAATGTCCCACCCACCTGACGTCACTGATTATTTTTCAAGGAACTTTGAGGGTCAAGACAACCACCTATGTTCCCAGGAGGTGGTAGAAAAATGTGCGTCTC	-	chr1_163005546_163005794_MECP2_HUMAN.H11MO.0.C_center167	MECP2	TCCGGAGG	167	CREB1	TGACGTCA	446	490	469	108	91	156	-0.116934	2.8577	-2.97463	1.80025	-1.05745	-1.91719
chr1_163005546_163005794_MECP2_HUMAN.H11MO.0.C_center167_to_E2F1_HUMAN.H11MO.0.A	chr1_163005546_163005794	GCATTTCCCACACTGAGGTCAAGATACTTCTATTGCCAAGGAAGGGTAAATGGATAGGAGGAGGCAAATTCTCCAGGGATGAGGATAGTGCCGGAAGTGGAGGTAAGTGAATTATGGGCTGATGATTCAGCAGCAAATCACCCATGGAAATGTCCCACCCACCGGCGGGAACTGATTATTTTTCAAGGAACTTTGAGGGTCAAGACAACCACCTATGTTCCCAGGAGGTGGTAGAAAAATGTGCGTCTC	-	chr1_163005546_163005794_MECP2_HUMAN.H11MO.0.C_center167	MECP2	TCCGGAGG	167	E2F1	GGCGGGAA	227	206	239	157	104	196	1.31154	2.8577	-1.54616	1.80025	-1.05745	-0.488715
chr1_163005546_163005794_MECP2_HUMAN.H11MO.0.C_center167_to_EGR1_C2H2_1	chr1_163005546_163005794	GCATTTCCCACACTGAGGTCAAGATACTTCTATTGCCAAGGAAGGGTAAATGGATAGGAGGAGGCAAATTCTCCAGGGATGAGGATAGTGCCGGAAGTGGAGGTAAGTGAATTATGGGCTGATGATTCAGCAGCAAATCACCCATGGAAATGTCCCACCCAACGCCCACGCATGATTATTTTTCAAGGAACTTTGAGGGTCAAGACAACCACCTATGTTCCCAGGAGGTGGTAGAAAAATGTGCGTCTC	-	chr1_163005546_163005794_MECP2_HUMAN.H11MO.0.C_center167	MECP2	CCTCCGGAGGC	167	EGR1	ACGCCCACGCA	254	273	266	190	177	279	1.58162	2.8577	-1.27608	1.80025	-1.05745	-0.218629
chr1_163005546_163005794_MECP2_HUMAN.H11MO.0.C_center167_to_FOSL1_MA0477.1	chr1_163005546_163005794	GCATTTCCCACACTGAGGTCAAGATACTTCTATTGCCAAGGAAGGGTAAATGGATAGGAGGAGGCAAATTCTCCAGGGATGAGGATAGTGCCGGAAGTGGAGGTAAGTGAATTATGGGCTGATGATTCAGCAGCAAATCACCCATGGAAATGTCCCACCCACGTGACTCATCTGATTATTTTTCAAGGAACTTTGAGGGTCAAGACAACCACCTATGTTCCCAGGAGGTGGTAGAAAAATGTGCGTCTC	-	chr1_163005546_163005794_MECP2_HUMAN.H11MO.0.C_center167	MECP2	CTCCGGAGG	167	AP-1	GTGACTCAT	428	420	418	206	150	283	0.874828	2.8577	-1.98287	1.80025	-1.05745	-0.925426
chr1_163005546_163005794_MECP2_HUMAN.H11MO.0.C_center167_to_MAFK_MA0496.2	chr1_163005546_163005794	GCATTTCCCACACTGAGGTCAAGATACTTCTATTGCCAAGGAAGGGTAAATGGATAGGAGGAGGCAAATTCTCCAGGGATGAGGATAGTGCCGGAAGTGGAGGTAAGTGAATTATGGGCTGATGATTCAGCAGCAAATCACCCATGGAAATGTCCCACCCTGCTGAGTCAGCAGATTATTTTTCAAGGAACTTTGAGGGTCAAGACAACCACCTATGTTCCCAGGAGGTGGTAGAAAAATGTGCGTCTC	-	chr1_163005546_163005794_MECP2_HUMAN.H11MO.0.C_center167	MECP2	ACCTCCGGAGGCT	167	MAF	TGCTGAGTCAGCA	239	240	208	284	298	412	2.42594	2.8577	-0.431762	1.80025	-1.05745	0.625685
chr1_163005546_163005794_MECP2_HUMAN.H11MO.0.C_center167_to_TP53_MA0106.3	chr1_163005546_163005794	GCATTTCCCACACTGAGGTCAAGATACTTCTATTGCCAAGGAAGGGTAAATGGATAGGAGGAGGCAAATTCTCCAGGGATGAGGATAGTGCCGGAAGTGGAGGTAAGTGAATTATGGGCTGATGATTCAGCAGCAAATCACCCATGGAAATGTCCCACCACATGCCCGGGCATGTTTATTTTTCAAGGAACTTTGAGGGTCAAGACAACCACCTATGTTCCCAGGAGGTGGTAGAAAAATGTGCGTCTC	-	chr1_163005546_163005794_MECP2_HUMAN.H11MO.0.C_center167	MECP2	CACCTCCGGAGGCTGA	167	P53	ACATGCCCGGGCATGT	256	304	258	183	159	266	1.44382	2.8577	-1.41388	1.80025	-1.05745	-0.356437
chr1_163005546_163005794_MECP2_HUMAN.H11MO.0.C_center93_to_CREB1_MA0018.3	chr1_163005546_163005794	GCATTTCCCACACTGAGGTCAAGATACTTCTATTGCCAAGGAAGGGTAAATGGATAGGAGGAGGCAAATTCTCCAGGGATGAGGATAGTTGACGTCATGGAGGTAAGTGAATTATGGGCTGATGATTCAGCAGCAAATCACCCATGGAAATGTCCCACCCACCTCCGGAGGCTGATTATTTTTCAAGGAACTTTGAGGGTCAAGACAACCACCTATGTTCCCAGGAGGTGGTAGAAAAATGTGCGTCTC	-	chr1_163005546_163005794_MECP2_HUMAN.H11MO.0.C_center93	MECP2	GCCGGAAG	93	CREB1	TGACGTCA	412	485	493	723	774	934	2.72958	2.8577	-0.128118	0.544401	-2.3133	2.18518
chr1_163005546_163005794_MECP2_HUMAN.H11MO.0.C_center93_to_E2F1_HUMAN.H11MO.0.A	chr1_163005546_163005794	GCATTTCCCACACTGAGGTCAAGATACTTCTATTGCCAAGGAAGGGTAAATGGATAGGAGGAGGCAAATTCTCCAGGGATGAGGATAGTGGCGGGAATGGAGGTAAGTGAATTATGGGCTGATGATTCAGCAGCAAATCACCCATGGAAATGTCCCACCCACCTCCGGAGGCTGATTATTTTTCAAGGAACTTTGAGGGTCAAGACAACCACCTATGTTCCCAGGAGGTGGTAGAAAAATGTGCGTCTC	-	chr1_163005546_163005794_MECP2_HUMAN.H11MO.0.C_center93	MECP2	GCCGGAAG	93	E2F1	GGCGGGAA	238	248	267	103	94	229	0.983212	2.8577	-1.87449	0.544401	-2.3133	0.438811
chr1_163005546_163005794_MECP2_HUMAN.H11MO.0.C_center93_to_EGR1_C2H2_1	chr1_163005546_163005794	GCATTTCCCACACTGAGGTCAAGATACTTCTATTGCCAAGGAAGGGTAAATGGATAGGAGGAGGCAAATTCTCCAGGGATGAGGATAACGCCCACGCAGGAGGTAAGTGAATTATGGGCTGATGATTCAGCAGCAAATCACCCATGGAAATGTCCCACCCACCTCCGGAGGCTGATTATTTTTCAAGGAACTTTGAGGGTCAAGACAACCACCTATGTTCCCAGGAGGTGGTAGAAAAATGTGCGTCTC	-	chr1_163005546_163005794_MECP2_HUMAN.H11MO.0.C_center93	MECP2	GTGCCGGAAGT	93	EGR1	ACGCCCACGCA	184	175	186	274	262	361	2.61814	2.8577	-0.239558	0.544401	-2.3133	2.07374
chr1_163005546_163005794_MECP2_HUMAN.H11MO.0.C_center93_to_FOSL1_MA0477.1	chr1_163005546_163005794	GCATTTCCCACACTGAGGTCAAGATACTTCTATTGCCAAGGAAGGGTAAATGGATAGGAGGAGGCAAATTCTCCAGGGATGAGGATAGGTGACTCATTGGAGGTAAGTGAATTATGGGCTGATGATTCAGCAGCAAATCACCCATGGAAATGTCCCACCCACCTCCGGAGGCTGATTATTTTTCAAGGAACTTTGAGGGTCAAGACAACCACCTATGTTCCCAGGAGGTGGTAGAAAAATGTGCGTCTC	-	chr1_163005546_163005794_MECP2_HUMAN.H11MO.0.C_center93	MECP2	TGCCGGAAG	93	AP-1	GTGACTCAT	166	148	178	431	431	663	3.51074	2.8577	0.653034	0.544401	-2.3133	2.96633
chr1_163005546_163005794_MECP2_HUMAN.H11MO.0.C_center93_to_MAFK_MA0496.2	chr1_163005546_163005794	GCATTTCCCACACTGAGGTCAAGATACTTCTATTGCCAAGGAAGGGTAAATGGATAGGAGGAGGCAAATTCTCCAGGGATGAGGATTGCTGAGTCAGCAGAGGTAAGTGAATTATGGGCTGATGATTCAGCAGCAAATCACCCATGGAAATGTCCCACCCACCTCCGGAGGCTGATTATTTTTCAAGGAACTTTGAGGGTCAAGACAACCACCTATGTTCCCAGGAGGTGGTAGAAAAATGTGCGTCTC	-	chr1_163005546_163005794_MECP2_HUMAN.H11MO.0.C_center93	MECP2	AGTGCCGGAAGTG	93	MAF	TGCTGAGTCAGCA	317	343	309	320	261	356	1.86263	2.8577	-0.995068	0.544401	-2.3133	1.31823
chr1_163005546_163005794_MECP2_HUMAN.H11MO.0.C_center93_to_TP53_MA0106.3	chr1_163005546_163005794	GCATTTCCCACACTGAGGTCAAGATACTTCTATTGCCAAGGAAGGGTAAATGGATAGGAGGAGGCAAATTCTCCAGGGATGAGGAACATGCCCGGGCATGTGGTAAGTGAATTATGGGCTGATGATTCAGCAGCAAATCACCCATGGAAATGTCCCACCCACCTCCGGAGGCTGATTATTTTTCAAGGAACTTTGAGGGTCAAGACAACCACCTATGTTCCCAGGAGGTGGTAGAAAAATGTGCGTCTC	-	chr1_163005546_163005794_MECP2_HUMAN.H11MO.0.C_center93	MECP2	TAGTGCCGGAAGTGGA	93	P53	ACATGCCCGGGCATGT	246	257	255	1843	1563	2662	4.87285	2.8577	2.01515	0.544401	-2.3133	4.32845
chr1_165620180_165620428_MAFK_MA0496.2_center237_to_CREB1_MA0018.3	chr1_165620180_165620428	AGGTTCATTTTAACTTTCAACACTGAATGCTCCTCTTGACCATCTGATCAGTATGTGCTTTGTTGTGACAGTATCCTATCATGTACAGCACGGACCCTGAAAATGGGCACATCTTCAACTGCATTCAGCGAGCCCACCAGAACACGTGAGTGTCGGCCCTGCCGGGCACCAAAGACATCTGCAGAGTGGGTGTTTTCTGTCTAACACCTCAGCCCTTAGTGCGCTGTATTTGCTGACGTCAAGTGATGG	+	chr1_165620180_165620428_MAFK_MA0496.2_center237	MAF	TGAGTCAT	237	CREB1	TGACGTCA	377	421	371	100	83	146	0.0348161	2.18594	-2.15112	0.262624	-1.92332	-0.227808
chr1_165620180_165620428_MAFK_MA0496.2_center237_to_E2F1_HUMAN.H11MO.0.A	chr1_165620180_165620428	AGGTTCATTTTAACTTTCAACACTGAATGCTCCTCTTGACCATCTGATCAGTATGTGCTTTGTTGTGACAGTATCCTATCATGTACAGCACGGACCCTGAAAATGGGCACATCTTCAACTGCATTCAGCGAGCCCACCAGAACACGTGAGTGTCGGCCCTGCCGGGCACCAAAGACATCTGCAGAGTGGGTGTTTTCTGTCTAACACCTCAGCCCTTAGTGCGCTGTATTTGCGGCGGGAAAGTGATGG	+	chr1_165620180_165620428_MAFK_MA0496.2_center237	MAF	TGAGTCAT	237	E2F1	GGCGGGAA	181	178	192	41	27	74	-0.137141	2.18594	-2.32308	0.262624	-1.92332	-0.399766
chr1_165620180_165620428_MAFK_MA0496.2_center237_to_EGR1_C2H2_1	chr1_165620180_165620428	AGGTTCATTTTAACTTTCAACACTGAATGCTCCTCTTGACCATCTGATCAGTATGTGCTTTGTTGTGACAGTATCCTATCATGTACAGCACGGACCCTGAAAATGGGCACATCTTCAACTGCATTCAGCGAGCCCACCAGAACACGTGAGTGTCGGCCCTGCCGGGCACCAAAGACATCTGCAGAGTGGGTGTTTTCTGTCTAACACCTCAGCCCTTAGTGCGCTGTATTTACGCCCACGCAGTGATGG	+	chr1_165620180_165620428_MAFK_MA0496.2_center237	MAF	GCTGAGTCATA	237	EGR1	ACGCCCACGCA	558	606	568	109	84	190	-0.348051	2.18594	-2.53399	0.262624	-1.92332	-0.610676
chr1_165620180_165620428_MAFK_MA0496.2_center237_to_ETS1_HUMAN.H11MO.0.A	chr1_165620180_165620428	AGGTTCATTTTAACTTTCAACACTGAATGCTCCTCTTGACCATCTGATCAGTATGTGCTTTGTTGTGACAGTATCCTATCATGTACAGCACGGACCCTGAAAATGGGCACATCTTCAACTGCATTCAGCGAGCCCACCAGAACACGTGAGTGTCGGCCCTGCCGGGCACCAAAGACATCTGCAGAGTGGGTGTTTTCTGTCTAACACCTCAGCCCTTAGTGCGCTGTATTTGACCGGAAGTAGTGATGG	+	chr1_165620180_165620428_MAFK_MA0496.2_center237	MAF	CTGAGTCAT	237	ETS	ACCGGAAGT	269	308	299	112	81	162	0.551151	2.18594	-1.63479	0.262624	-1.92332	0.288527
chr1_165620180_165620428_MAFK_MA0496.2_center237_to_MECP2_HUMAN.H11MO.0.C	chr1_165620180_165620428	AGGTTCATTTTAACTTTCAACACTGAATGCTCCTCTTGACCATCTGATCAGTATGTGCTTTGTTGTGACAGTATCCTATCATGTACAGCACGGACCCTGAAAATGGGCACATCTTCAACTGCATTCAGCGAGCCCACCAGAACACGTGAGTGTCGGCCCTGCCGGGCACCAAAGACATCTGCAGAGTGGGTGTTTTCTGTCTAACACCTCAGCCCTTAGTGCGCTGTATTTGCCCCGGAGTAGTGATGG	+	chr1_165620180_165620428_MAFK_MA0496.2_center237	MAF	TGAGTCA	237	MECP2	CCCGGAG	227	260	237	52	35	72	-0.333258	2.18594	-2.5192	0.262624	-1.92332	-0.595882
chr1_165620180_165620428_MAFK_MA0496.2_center237_to_TP53_MA0106.3	chr1_165620180_165620428	AGGTTCATTTTAACTTTCAACACTGAATGCTCCTCTTGACCATCTGATCAGTATGTGCTTTGTTGTGACAGTATCCTATCATGTACAGCACGGACCCTGAAAATGGGCACATCTTCAACTGCATTCAGCGAGCCCACCAGAACACGTGAGTGTCGGCCCTGCCGGGCACCAAAGACATCTGCAGAGTGGGTGTTTTCTGTCTAACACCTCAGCCCTTAGTGCGCTGTATACATGCCCGGGCATGTATGG	+	chr1_165620180_165620428_MAFK_MA0496.2_center237	MAF	TTGCTGAGTCATAGTG	237	P53	ACATGCCCGGGCATGT	349	390	370	773	610	1047	3.00743	2.18594	0.821495	0.262624	-1.92332	2.74481
chr1_166009356_166009604_ETS1_HUMAN.H11MO.0.A_center187_to_CREB1_MA0018.3	chr1_166009356_166009604	AGGAGCCTTCTAGCACTCAGGGCAAGGAATCCATCAATAAAACATCAAAGGCCAGTGCCATTAGAGGAGGTAAAGCGGGATATTTTATTCATGACTGTATTTTGAAGGGGCTTGCTCATGACTCACAAATTATTCATGAGCTTTTTCTATTTTTAAATGTAAATTACAAGGGTGTTTAAAGGGTGACGTCACCTACACCCTTCCCTTTGGTACCACTCTGCTATTTTTGGGAAAGACTGCCTCATTTCA	-	chr1_166009356_166009604_ETS1_HUMAN.H11MO.0.A_center187	ETS	GCGGAAGT	187	CREB1	TGACGTCA	280	269	240	637	607	677	3.22058	2.58919	0.631398	1.391	-1.19819	1.82959
chr1_166009356_166009604_ETS1_HUMAN.H11MO.0.A_center187_to_E2F1_HUMAN.H11MO.0.A	chr1_166009356_166009604	AGGAGCCTTCTAGCACTCAGGGCAAGGAATCCATCAATAAAACATCAAAGGCCAGTGCCATTAGAGGAGGTAAAGCGGGATATTTTATTCATGACTGTATTTTGAAGGGGCTTGCTCATGACTCACAAATTATTCATGAGCTTTTTCTATTTTTAAATGTAAATTACAAGGGTGTTTAAAGGGGGCGGGAACCTACACCCTTCCCTTTGGTACCACTCTGCTATTTTTGGGAAAGACTGCCTCATTTCA	-	chr1_166009356_166009604_ETS1_HUMAN.H11MO.0.A_center187	ETS	GCGGAAGT	187	E2F1	GGCGGGAA	252	311	264	163	160	193	1.23935	2.58919	-1.34983	1.391	-1.19819	-0.151645
chr1_166009356_166009604_ETS1_HUMAN.H11MO.0.A_center187_to_EGR1_C2H2_1	chr1_166009356_166009604	AGGAGCCTTCTAGCACTCAGGGCAAGGAATCCATCAATAAAACATCAAAGGCCAGTGCCATTAGAGGAGGTAAAGCGGGATATTTTATTCATGACTGTATTTTGAAGGGGCTTGCTCATGACTCACAAATTATTCATGAGCTTTTTCTATTTTTAAATGTAAATTACAAGGGTGTTTAAAGACGCCCACGCACTACACCCTTCCCTTTGGTACCACTCTGCTATTTTTGGGAAAGACTGCCTCATTTCA	-	chr1_166009356_166009604_ETS1_HUMAN.H11MO.0.A_center187	ETS	GGGCGGAAGTC	187	EGR1	ACGCCCACGCA	176	191	191	156	144	209	1.75862	2.58919	-0.830566	1.391	-1.19819	0.367623
chr1_166009356_166009604_ETS1_HUMAN.H11MO.0.A_center187_to_FOSL1_MA0477.1	chr1_166009356_166009604	AGGAGCCTTCTAGCACTCAGGGCAAGGAATCCATCAATAAAACATCAAAGGCCAGTGCCATTAGAGGAGGTAAAGCGGGATATTTTATTCATGACTGTATTTTGAAGGGGCTTGCTCATGACTCACAAATTATTCATGAGCTTTTTCTATTTTTAAATGTAAATTACAAGGGTGTTTAAAGGGTGACTCATCCTACACCCTTCCCTTTGGTACCACTCTGCTATTTTTGGGAAAGACTGCCTCATTTCA	-	chr1_166009356_166009604_ETS1_HUMAN.H11MO.0.A_center187	ETS	GGCGGAAGT	187	AP-1	GTGACTCAT	200	202	213	878	852	935	4.05753	2.58919	1.46834	1.391	-1.19819	2.66653
chr1_166009356_166009604_ETS1_HUMAN.H11MO.0.A_center187_to_MAFK_MA0496.2	chr1_166009356_166009604	AGGAGCCTTCTAGCACTCAGGGCAAGGAATCCATCAATAAAACATCAAAGGCCAGTGCCATTAGAGGAGGTAAAGCGGGATATTTTATTCATGACTGTATTTTGAAGGGGCTTGCTCATGACTCACAAATTATTCATGAGCTTTTTCTATTTTTAAATGTAAATTACAAGGGTGTTTAAATGCTGAGTCAGCATACACCCTTCCCTTTGGTACCACTCTGCTATTTTTGGGAAAGACTGCCTCATTTCA	-	chr1_166009356_166009604_ETS1_HUMAN.H11MO.0.A_center187	ETS	GGGGCGGAAGTCC	187	MAF	TGCTGAGTCAGCA	186	221	215	445	433	494	3.07706	2.58919	0.487875	1.391	-1.19819	1.68606
chr1_166009356_166009604_ETS1_HUMAN.H11MO.0.A_center187_to_MECP2_HUMAN.H11MO.0.C	chr1_166009356_166009604	AGGAGCCTTCTAGCACTCAGGGCAAGGAATCCATCAATAAAACATCAAAGGCCAGTGCCATTAGAGGAGGTAAAGCGGGATATTTTATTCATGACTGTATTTTGAAGGGGCTTGCTCATGACTCACAAATTATTCATGAGCTTTTTCTATTTTTAAATGTAAATTACAAGGGTGTTTAAAGGGCCCGGAGTCCTACACCCTTCCCTTTGGTACCACTCTGCTATTTTTGGGAAAGACTGCCTCATTTCA	-	chr1_166009356_166009604_ETS1_HUMAN.H11MO.0.A_center187	ETS	GCGGAAG	187	MECP2	CCCGGAG	190	232	219	177	165	189	1.66031	2.58919	-0.92888	1.391	-1.19819	0.26931
chr1_166009356_166009604_ETS1_HUMAN.H11MO.0.A_center187_to_TP53_MA0106.3	chr1_166009356_166009604	AGGAGCCTTCTAGCACTCAGGGCAAGGAATCCATCAATAAAACATCAAAGGCCAGTGCCATTAGAGGAGGTAAAGCGGGATATTTTATTCATGACTGTATTTTGAAGGGGCTTGCTCATGACTCACAAATTATTCATGAGCTTTTTCTATTTTTAAATGTAAATTACAAGGGTGTTTAAACATGCCCGGGCATGTCACCCTTCCCTTTGGTACCACTCTGCTATTTTTGGGAAAGACTGCCTCATTTCA	-	chr1_166009356_166009604_ETS1_HUMAN.H11MO.0.A_center187	ETS	AGGGGCGGAAGTCCTA	187	P53	ACATGCCCGGGCATGT	328	400	381	1383	1132	1730	3.83305	2.58919	1.24386	1.391	-1.19819	2.44205
chr1_166009356_166009604_FOSL1_MA0477.1_center122_to_CREB1_MA0018.3	chr1_166009356_166009604	AGGAGCCTTCTAGCACTCAGGGCAAGGAATCCATCAATAAAACATCAAAGGCCAGTGCCATTAGAGGAGGTAAAGCGGGATATTTTATTCATGACTGTATTTTGAAGGGGCTTGCTCATGACGTCAAAATTATTCATGAGCTTTTTCTATTTTTAAATGTAAATTACAAGGGTGTTTAAAGGGGCGGAAGTCCTACACCCTTCCCTTTGGTACCACTCTGCTATTTTTGGGAAAGACTGCCTCATTTCA	-	chr1_166009356_166009604_FOSL1_MA0477.1_center122	AP-1	TGACTCAC	122	CREB1	TGACGTCA	236	258	260	126	125	151	1.0086	2.58919	-1.58058	0.610709	-1.97848	0.397894
chr1_166009356_166009604_FOSL1_MA0477.1_center122_to_E2F1_HUMAN.H11MO.0.A	chr1_166009356_166009604	AGGAGCCTTCTAGCACTCAGGGCAAGGAATCCATCAATAAAACATCAAAGGCCAGTGCCATTAGAGGAGGTAAAGCGGGATATTTTATTCATGACTGTATTTTGAAGGGGCTTGCTCAGGCGGGAAAAATTATTCATGAGCTTTTTCTATTTTTAAATGTAAATTACAAGGGTGTTTAAAGGGGCGGAAGTCCTACACCCTTCCCTTTGGTACCACTCTGCTATTTTTGGGAAAGACTGCCTCATTTCA	-	chr1_166009356_166009604_FOSL1_MA0477.1_center122	AP-1	TGACTCAC	122	E2F1	GGCGGGAA	198	234	227	46	34	65	-0.32571	2.58919	-2.9149	0.610709	-1.97848	-0.93642
chr1_166009356_166009604_FOSL1_MA0477.1_center122_to_EGR1_C2H2_1	chr1_166009356_166009604	AGGAGCCTTCTAGCACTCAGGGCAAGGAATCCATCAATAAAACATCAAAGGCCAGTGCCATTAGAGGAGGTAAAGCGGGATATTTTATTCATGACTGTATTTTGAAGGGGCTTGCTACGCCCACGCAAATTATTCATGAGCTTTTTCTATTTTTAAATGTAAATTACAAGGGTGTTTAAAGGGGCGGAAGTCCTACACCCTTCCCTTTGGTACCACTCTGCTATTTTTGGGAAAGACTGCCTCATTTCA	-	chr1_166009356_166009604_FOSL1_MA0477.1_center122	AP-1	CATGACTCACA	122	EGR1	ACGCCCACGCA	135	142	129	50	55	71	0.682956	2.58919	-1.90623	0.610709	-1.97848	0.0722471
chr1_166009356_166009604_FOSL1_MA0477.1_center122_to_ETS1_HUMAN.H11MO.0.A	chr1_166009356_166009604	AGGAGCCTTCTAGCACTCAGGGCAAGGAATCCATCAATAAAACATCAAAGGCCAGTGCCATTAGAGGAGGTAAAGCGGGATATTTTATTCATGACTGTATTTTGAAGGGGCTTGCTCACCGGAAGTAAATTATTCATGAGCTTTTTCTATTTTTAAATGTAAATTACAAGGGTGTTTAAAGGGGCGGAAGTCCTACACCCTTCCCTTTGGTACCACTCTGCTATTTTTGGGAAAGACTGCCTCATTTCA	-	chr1_166009356_166009604_FOSL1_MA0477.1_center122	AP-1	ATGACTCAC	122	ETS	ACCGGAAGT	316	354	304	232	202	229	1.38155	2.58919	-1.20763	0.610709	-1.97848	0.770844
chr1_166009356_166009604_FOSL1_MA0477.1_center122_to_MECP2_HUMAN.H11MO.0.C	chr1_166009356_166009604	AGGAGCCTTCTAGCACTCAGGGCAAGGAATCCATCAATAAAACATCAAAGGCCAGTGCCATTAGAGGAGGTAAAGCGGGATATTTTATTCATGACTGTATTTTGAAGGGGCTTGCTCACCCGGAGCAAATTATTCATGAGCTTTTTCTATTTTTAAATGTAAATTACAAGGGTGTTTAAAGGGGCGGAAGTCCTACACCCTTCCCTTTGGTACCACTCTGCTATTTTTGGGAAAGACTGCCTCATTTCA	-	chr1_166009356_166009604_FOSL1_MA0477.1_center122	AP-1	TGACTCA	122	MECP2	CCCGGAG	148	160	170	64	45	101	0.653125	2.58919	-1.93606	0.610709	-1.97848	0.0424153
chr1_166009356_166009604_FOSL1_MA0477.1_center122_to_TP53_MA0106.3	chr1_166009356_166009604	AGGAGCCTTCTAGCACTCAGGGCAAGGAATCCATCAATAAAACATCAAAGGCCAGTGCCATTAGAGGAGGTAAAGCGGGATATTTTATTCATGACTGTATTTTGAAGGGGCTTGACATGCCCGGGCATGTTATTCATGAGCTTTTTCTATTTTTAAATGTAAATTACAAGGGTGTTTAAAGGGGCGGAAGTCCTACACCCTTCCCTTTGGTACCACTCTGCTATTTTTGGGAAAGACTGCCTCATTTCA	-	chr1_166009356_166009604_FOSL1_MA0477.1_center122	AP-1	CTCATGACTCACAAAT	122	P53	ACATGCCCGGGCATGT	132	128	130	222	167	254	2.6168	2.58919	0.0276171	0.610709	-1.97848	2.00609
chr1_167486827_167487075_EGR1_C2H2_1_center82_to_CREB1_MA0018.3	chr1_167486827_167487075	GGCAGCCTCCACAGCGCCTTCGCCACCTCATGGCCAAGCGTCCGTGTCTAGGCTCAGCCTTGTCATGGCTGTCCCCACTGACGTCACTGGGACTGCCGGGTGACGCACCATCCCAGGCTCCGTGACTCACCCCAGCCTGCCCCTTAGGCGGCCATCTAGCCCAGCCAGAGGGCCCGGCATTGACAGAACACGGGGCAGATGAGACGATGTGCCTGGTTAAGTCACCACCACGAGCAGCGCCCAGCCAAC	-	chr1_167486827_167487075_EGR1_C2H2_1_center82	EGR1	ACCCACGC	82	CREB1	TGACGTCA	266	256	315	558	598	439	2.93112	2.87002	0.061098	1.08407	-1.78595	1.84705
chr1_167486827_167487075_EGR1_C2H2_1_center82_to_E2F1_HUMAN.H11MO.0.A	chr1_167486827_167487075	GGCAGCCTCCACAGCGCCTTCGCCACCTCATGGCCAAGCGTCCGTGTCTAGGCTCAGCCTTGTCATGGCTGTCCCCACGGCGGGAACTGGGACTGCCGGGTGACGCACCATCCCAGGCTCCGTGACTCACCCCAGCCTGCCCCTTAGGCGGCCATCTAGCCCAGCCAGAGGGCCCGGCATTGACAGAACACGGGGCAGATGAGACGATGTGCCTGGTTAAGTCACCACCACGAGCAGCGCCCAGCCAAC	-	chr1_167486827_167487075_EGR1_C2H2_1_center82	EGR1	ACCCACGC	82	E2F1	GGCGGGAA	230	245	225	178	138	207	1.47477	2.87002	-1.39526	1.08407	-1.78595	0.390694
chr1_167486827_167487075_EGR1_C2H2_1_center82_to_ETS1_HUMAN.H11MO.0.A	chr1_167486827_167487075	GGCAGCCTCCACAGCGCCTTCGCCACCTCATGGCCAAGCGTCCGTGTCTAGGCTCAGCCTTGTCATGGCTGTCCCCAACCGGAAGTCTGGGACTGCCGGGTGACGCACCATCCCAGGCTCCGTGACTCACCCCAGCCTGCCCCTTAGGCGGCCATCTAGCCCAGCCAGAGGGCCCGGCATTGACAGAACACGGGGCAGATGAGACGATGTGCCTGGTTAAGTCACCACCACGAGCAGCGCCCAGCCAAC	-	chr1_167486827_167487075_EGR1_C2H2_1_center82	EGR1	CACCCACGC	82	ETS	ACCGGAAGT	235	250	229	524	498	425	3.00001	2.87002	0.129981	1.08407	-1.78595	1.91593
chr1_167486827_167487075_EGR1_C2H2_1_center82_to_FOSL1_MA0477.1	chr1_167486827_167487075	GGCAGCCTCCACAGCGCCTTCGCCACCTCATGGCCAAGCGTCCGTGTCTAGGCTCAGCCTTGTCATGGCTGTCCCCAGTGACTCATCTGGGACTGCCGGGTGACGCACCATCCCAGGCTCCGTGACTCACCCCAGCCTGCCCCTTAGGCGGCCATCTAGCCCAGCCAGAGGGCCCGGCATTGACAGAACACGGGGCAGATGAGACGATGTGCCTGGTTAAGTCACCACCACGAGCAGCGCCCAGCCAAC	-	chr1_167486827_167487075_EGR1_C2H2_1_center82	EGR1	CACCCACGC	82	AP-1	GTGACTCAT	490	528	512	2122	2026	1575	3.90116	2.87002	1.03113	1.08407	-1.78595	2.81709
chr1_167486827_167487075_EGR1_C2H2_1_center82_to_MAFK_MA0496.2	chr1_167486827_167487075	GGCAGCCTCCACAGCGCCTTCGCCACCTCATGGCCAAGCGTCCGTGTCTAGGCTCAGCCTTGTCATGGCTGTCCCTGCTGAGTCAGCAGGGACTGCCGGGTGACGCACCATCCCAGGCTCCGTGACTCACCCCAGCCTGCCCCTTAGGCGGCCATCTAGCCCAGCCAGAGGGCCCGGCATTGACAGAACACGGGGCAGATGAGACGATGTGCCTGGTTAAGTCACCACCACGAGCAGCGCCCAGCCAAC	-	chr1_167486827_167487075_EGR1_C2H2_1_center82	EGR1	CACACCCACGCCT	82	MAF	TGCTGAGTCAGCA	473	496	500	1331	1301	1055	3.31801	2.87002	0.447988	1.08407	-1.78595	2.23394
chr1_167486827_167487075_EGR1_C2H2_1_center82_to_MECP2_HUMAN.H11MO.0.C	chr1_167486827_167487075	GGCAGCCTCCACAGCGCCTTCGCCACCTCATGGCCAAGCGTCCGTGTCTAGGCTCAGCCTTGTCATGGCTGTCCCCACCCCGGAGCCTGGGACTGCCGGGTGACGCACCATCCCAGGCTCCGTGACTCACCCCAGCCTGCCCCTTAGGCGGCCATCTAGCCCAGCCAGAGGGCCCGGCATTGACAGAACACGGGGCAGATGAGACGATGTGCCTGGTTAAGTCACCACCACGAGCAGCGCCCAGCCAAC	-	chr1_167486827_167487075_EGR1_C2H2_1_center82	EGR1	ACCCACG	82	MECP2	CCCGGAG	108	84	98	94	114	117	2.09196	2.87002	-0.77807	1.08407	-1.78595	1.00788
chr1_167486827_167487075_EGR1_C2H2_1_center82_to_TP53_MA0106.3	chr1_167486827_167487075	GGCAGCCTCCACAGCGCCTTCGCCACCTCATGGCCAAGCGTCCGTGTCTAGGCTCAGCCTTGTCATGGCTGTCCACATGCCCGGGCATGTGACTGCCGGGTGACGCACCATCCCAGGCTCCGTGACTCACCCCAGCCTGCCCCTTAGGCGGCCATCTAGCCCAGCCAGAGGGCCCGGCATTGACAGAACACGGGGCAGATGAGACGATGTGCCTGGTTAAGTCACCACCACGAGCAGCGCCCAGCCAAC	-	chr1_167486827_167487075_EGR1_C2H2_1_center82	EGR1	CCACACCCACGCCTGG	82	P53	ACATGCCCGGGCATGT	144	119	111	559	536	591	4.10859	2.87002	1.23856	1.08407	-1.78595	3.02451
chr1_169082966_169083214_FOSL1_MA0477.1_center157_to_CREB1_MA0018.3	chr1_169082966_169083214	GCCCCCGAAAAACCCCACAGGGTAAGGCAGGTGAAGAGGAGGGGCCTGGCCTAGACTCTCCTGAAAGGTGATGGGGGAAGGGATGAGGAAAAGAAGAGACAGAAATTACCAGGCCAAAGAACAAGGAAGATGGAGGACTGAGGACTTTTCCTGTGACGTCAACCACAGGACAGGAATGCATTTTTCCAAGATGAGCCACCAGCATTCCTTTGGAGAAGTCAGGGTTTGTCAGGTCAGTCCAACTGCTGT	-	chr1_169082966_169083214_FOSL1_MA0477.1_center157	AP-1	TGACTCAG	157	CREB1	TGACGTCA	58	73	65	373	408	397	4.54397	4.15969	0.384285	1.83034	-2.32934	2.71363
chr1_169082966_169083214_FOSL1_MA0477.1_center157_to_E2F1_HUMAN.H11MO.0.A	chr1_169082966_169083214	GCCCCCGAAAAACCCCACAGGGTAAGGCAGGTGAAGAGGAGGGGCCTGGCCTAGACTCTCCTGAAAGGTGATGGGGGAAGGGATGAGGAAAAGAAGAGACAGAAATTACCAGGCCAAAGAACAAGGAAGATGGAGGACTGAGGACTTTTCCTGGGCGGGAAACCACAGGACAGGAATGCATTTTTCCAAGATGAGCCACCAGCATTCCTTTGGAGAAGTCAGGGTTTGTCAGGTCAGTCCAACTGCTGT	-	chr1_169082966_169083214_FOSL1_MA0477.1_center157	AP-1	TGACTCAG	157	E2F1	GGCGGGAA	221	267	247	342	319	509	2.54905	4.15969	-1.61064	1.83034	-2.32934	0.718702
chr1_169082966_169083214_FOSL1_MA0477.1_center157_to_EGR1_C2H2_1	chr1_169082966_169083214	GCCCCCGAAAAACCCCACAGGGTAAGGCAGGTGAAGAGGAGGGGCCTGGCCTAGACTCTCCTGAAAGGTGATGGGGGAAGGGATGAGGAAAAGAAGAGACAGAAATTACCAGGCCAAAGAACAAGGAAGATGGAGGACTGAGGACTTTTCCACGCCCACGCACCACAGGACAGGAATGCATTTTTCCAAGATGAGCCACCAGCATTCCTTTGGAGAAGTCAGGGTTTGTCAGGTCAGTCCAACTGCTGT	-	chr1_169082966_169083214_FOSL1_MA0477.1_center157	AP-1	TGTGACTCAGA	157	EGR1	ACGCCCACGCA	47	41	53	222	197	223	4.12256	4.15969	-0.0371222	1.83034	-2.32934	2.29222
chr1_169082966_169083214_FOSL1_MA0477.1_center157_to_ETS1_HUMAN.H11MO.0.A	chr1_169082966_169083214	GCCCCCGAAAAACCCCACAGGGTAAGGCAGGTGAAGAGGAGGGGCCTGGCCTAGACTCTCCTGAAAGGTGATGGGGGAAGGGATGAGGAAAAGAAGAGACAGAAATTACCAGGCCAAAGAACAAGGAAGATGGAGGACTGAGGACTTTTCCTACCGGAAGTACCACAGGACAGGAATGCATTTTTCCAAGATGAGCCACCAGCATTCCTTTGGAGAAGTCAGGGTTTGTCAGGTCAGTCCAACTGCTGT	-	chr1_169082966_169083214_FOSL1_MA0477.1_center157	AP-1	GTGACTCAG	157	ETS	ACCGGAAGT	79	72	84	318	252	281	3.80173	4.15969	-0.357952	1.83034	-2.32934	1.97139
chr1_169082966_169083214_FOSL1_MA0477.1_center157_to_MECP2_HUMAN.H11MO.0.C	chr1_169082966_169083214	GCCCCCGAAAAACCCCACAGGGTAAGGCAGGTGAAGAGGAGGGGCCTGGCCTAGACTCTCCTGAAAGGTGATGGGGGAAGGGATGAGGAAAAGAAGAGACAGAAATTACCAGGCCAAAGAACAAGGAAGATGGAGGACTGAGGACTTTTCCTGCCCGGAGGACCACAGGACAGGAATGCATTTTTCCAAGATGAGCCACCAGCATTCCTTTGGAGAAGTCAGGGTTTGTCAGGTCAGTCCAACTGCTGT	-	chr1_169082966_169083214_FOSL1_MA0477.1_center157	AP-1	TGACTCA	157	MECP2	CCCGGAG	44	39	31	35	37	59	2.05878	4.15969	-2.10091	1.83034	-2.32934	0.228436
chr1_169082966_169083214_FOSL1_MA0477.1_center157_to_TP53_MA0106.3	chr1_169082966_169083214	GCCCCCGAAAAACCCCACAGGGTAAGGCAGGTGAAGAGGAGGGGCCTGGCCTAGACTCTCCTGAAAGGTGATGGGGGAAGGGATGAGGAAAAGAAGAGACAGAAATTACCAGGCCAAAGAACAAGGAAGATGGAGGACTGAGGACTTTTACATGCCCGGGCATGTCAGGACAGGAATGCATTTTTCCAAGATGAGCCACCAGCATTCCTTTGGAGAAGTCAGGGTTTGTCAGGTCAGTCCAACTGCTGT	-	chr1_169082966_169083214_FOSL1_MA0477.1_center157	AP-1	CCTGTGACTCAGACCA	157	P53	ACATGCCCGGGCATGT	139	159	168	1367	1146	1760	5.09071	4.15969	0.931022	1.83034	-2.32934	3.26037
chr1_169337291_169337539_ETS1_HUMAN.H11MO.0.A_center112_to_CREB1_MA0018.3	chr1_169337291_169337539	GAAATCTGTCCGCTTTTCACTTACGGAGGCCTTACAGTGTGTGTTCTGTGTTACTTGAGTTTATACGCACTGCAGAATTTGTTTACCCTGCTCTTTTGGAAACGTATTTGACGTCAGAAACCCTGAGTAATCGGAAGTGGTTAGGAGTGAGAGAGCTGCTGGATATGCGGAGGGACTGGGCGGGTCGGCTTCCGAATGGAAGAGGTCTGTGAGAAGTTAACCTGGTGATACCGATCCGAAGAGCCTATC	+	chr1_169337291_169337539_ETS1_HUMAN.H11MO.0.A_center112	ETS	CCGGAAGC	112	CREB1	TGACGTCA	544	558	516	1402	1291	1280	3.25657	3.58133	-0.324755	2.57049	-1.01084	0.686087
chr1_169337291_169337539_ETS1_HUMAN.H11MO.0.A_center112_to_E2F1_HUMAN.H11MO.0.A	chr1_169337291_169337539	GAAATCTGTCCGCTTTTCACTTACGGAGGCCTTACAGTGTGTGTTCTGTGTTACTTGAGTTTATACGCACTGCAGAATTTGTTTACCCTGCTCTTTTGGAAACGTATTGGCGGGAAGAAACCCTGAGTAATCGGAAGTGGTTAGGAGTGAGAGAGCTGCTGGATATGCGGAGGGACTGGGCGGGTCGGCTTCCGAATGGAAGAGGTCTGTGAGAAGTTAACCTGGTGATACCGATCCGAAGAGCCTATC	+	chr1_169337291_169337539_ETS1_HUMAN.H11MO.0.A_center112	ETS	CCGGAAGC	112	E2F1	GGCGGGAA	354	372	332	386	334	720	2.2696	3.58133	-1.31173	2.57049	-1.01084	-0.300888
chr1_169337291_169337539_ETS1_HUMAN.H11MO.0.A_center112_to_EGR1_C2H2_1	chr1_169337291_169337539	GAAATCTGTCCGCTTTTCACTTACGGAGGCCTTACAGTGTGTGTTCTGTGTTACTTGAGTTTATACGCACTGCAGAATTTGTTTACCCTGCTCTTTTGGAAACGTAACGCCCACGCAAAACCCTGAGTAATCGGAAGTGGTTAGGAGTGAGAGAGCTGCTGGATATGCGGAGGGACTGGGCGGGTCGGCTTCCGAATGGAAGAGGTCTGTGAGAAGTTAACCTGGTGATACCGATCCGAAGAGCCTATC	+	chr1_169337291_169337539_ETS1_HUMAN.H11MO.0.A_center112	ETS	TTCCGGAAGCG	112	EGR1	ACGCCCACGCA	192	232	212	572	450	497	3.20799	3.58133	-0.373338	2.57049	-1.01084	0.637504
chr1_169337291_169337539_ETS1_HUMAN.H11MO.0.A_center112_to_FOSL1_MA0477.1	chr1_169337291_169337539	GAAATCTGTCCGCTTTTCACTTACGGAGGCCTTACAGTGTGTGTTCTGTGTTACTTGAGTTTATACGCACTGCAGAATTTGTTTACCCTGCTCTTTTGGAAACGTATGTGACTCATGAAACCCTGAGTAATCGGAAGTGGTTAGGAGTGAGAGAGCTGCTGGATATGCGGAGGGACTGGGCGGGTCGGCTTCCGAATGGAAGAGGTCTGTGAGAAGTTAACCTGGTGATACCGATCCGAAGAGCCTATC	+	chr1_169337291_169337539_ETS1_HUMAN.H11MO.0.A_center112	ETS	TCCGGAAGC	112	AP-1	GTGACTCAT	300	300	328	1165	1140	1044	3.82325	3.58133	0.241922	2.57049	-1.01084	1.25276
chr1_169337291_169337539_ETS1_HUMAN.H11MO.0.A_center112_to_MAFK_MA0496.2	chr1_169337291_169337539	GAAATCTGTCCGCTTTTCACTTACGGAGGCCTTACAGTGTGTGTTCTGTGTTACTTGAGTTTATACGCACTGCAGAATTTGTTTACCCTGCTCTTTTGGAAACGTTGCTGAGTCAGCAAACCCTGAGTAATCGGAAGTGGTTAGGAGTGAGAGAGCTGCTGGATATGCGGAGGGACTGGGCGGGTCGGCTTCCGAATGGAAGAGGTCTGTGAGAAGTTAACCTGGTGATACCGATCCGAAGAGCCTATC	+	chr1_169337291_169337539_ETS1_HUMAN.H11MO.0.A_center112	ETS	ATTCCGGAAGCGA	112	MAF	TGCTGAGTCAGCA	635	643	673	892	724	951	2.31664	3.58133	-1.26469	2.57049	-1.01084	-0.25385
chr1_169337291_169337539_ETS1_HUMAN.H11MO.0.A_center112_to_MECP2_HUMAN.H11MO.0.C	chr1_169337291_169337539	GAAATCTGTCCGCTTTTCACTTACGGAGGCCTTACAGTGTGTGTTCTGTGTTACTTGAGTTTATACGCACTGCAGAATTTGTTTACCCTGCTCTTTTGGAAACGTATTCCCGGAGCGAAACCCTGAGTAATCGGAAGTGGTTAGGAGTGAGAGAGCTGCTGGATATGCGGAGGGACTGGGCGGGTCGGCTTCCGAATGGAAGAGGTCTGTGAGAAGTTAACCTGGTGATACCGATCCGAAGAGCCTATC	+	chr1_169337291_169337539_ETS1_HUMAN.H11MO.0.A_center112	ETS	CCGGAAG	112	MECP2	CCCGGAG	195	215	209	229	212	264	2.10655	3.58133	-1.47478	2.57049	-1.01084	-0.463934
chr1_169337291_169337539_ETS1_HUMAN.H11MO.0.A_center112_to_TP53_MA0106.3	chr1_169337291_169337539	GAAATCTGTCCGCTTTTCACTTACGGAGGCCTTACAGTGTGTGTTCTGTGTTACTTGAGTTTATACGCACTGCAGAATTTGTTTACCCTGCTCTTTTGGAAACGACATGCCCGGGCATGTCCCTGAGTAATCGGAAGTGGTTAGGAGTGAGAGAGCTGCTGGATATGCGGAGGGACTGGGCGGGTCGGCTTCCGAATGGAAGAGGTCTGTGAGAAGTTAACCTGGTGATACCGATCCGAAGAGCCTATC	+	chr1_169337291_169337539_ETS1_HUMAN.H11MO.0.A_center112	ETS	TATTCCGGAAGCGAAA	112	P53	ACATGCCCGGGCATGT	126	137	121	1548	1148	1919	5.47133	3.58133	1.89	2.57049	-1.01084	2.90085
chr1_169337291_169337539_ETS1_HUMAN.H11MO.0.A_center134_to_CREB1_MA0018.3	chr1_169337291_169337539	GAAATCTGTCCGCTTTTCACTTACGGAGGCCTTACAGTGTGTGTTCTGTGTTACTTGAGTTTATACGCACTGCAGAATTTGTTTACCCTGCTCTTTTGGAAACGTATTCCGGAAGCGAAACCCTGAGTAATGACGTCAGGTTAGGAGTGAGAGAGCTGCTGGATATGCGGAGGGACTGGGCGGGTCGGCTTCCGAATGGAAGAGGTCTGTGAGAAGTTAACCTGGTGATACCGATCCGAAGAGCCTATC	+	chr1_169337291_169337539_ETS1_HUMAN.H11MO.0.A_center134	ETS	TCGGAAGT	134	CREB1	TGACGTCA	89	116	99	185	177	187	2.79704	3.58133	-0.784291	1.49347	-2.08786	1.30356
chr1_169337291_169337539_ETS1_HUMAN.H11MO.0.A_center134_to_E2F1_HUMAN.H11MO.0.A	chr1_169337291_169337539	GAAATCTGTCCGCTTTTCACTTACGGAGGCCTTACAGTGTGTGTTCTGTGTTACTTGAGTTTATACGCACTGCAGAATTTGTTTACCCTGCTCTTTTGGAAACGTATTCCGGAAGCGAAACCCTGAGTAAGGCGGGAAGGTTAGGAGTGAGAGAGCTGCTGGATATGCGGAGGGACTGGGCGGGTCGGCTTCCGAATGGAAGAGGTCTGTGAGAAGTTAACCTGGTGATACCGATCCGAAGAGCCTATC	+	chr1_169337291_169337539_ETS1_HUMAN.H11MO.0.A_center134	ETS	TCGGAAGT	134	E2F1	GGCGGGAA	109	110	121	84	62	125	1.52346	3.58133	-2.05786	1.49347	-2.08786	0.0299911
chr1_169337291_169337539_ETS1_HUMAN.H11MO.0.A_center134_to_EGR1_C2H2_1	chr1_169337291_169337539	GAAATCTGTCCGCTTTTCACTTACGGAGGCCTTACAGTGTGTGTTCTGTGTTACTTGAGTTTATACGCACTGCAGAATTTGTTTACCCTGCTCTTTTGGAAACGTATTCCGGAAGCGAAACCCTGAGTACGCCCACGCAGTTAGGAGTGAGAGAGCTGCTGGATATGCGGAGGGACTGGGCGGGTCGGCTTCCGAATGGAAGAGGTCTGTGAGAAGTTAACCTGGTGATACCGATCCGAAGAGCCTATC	+	chr1_169337291_169337539_ETS1_HUMAN.H11MO.0.A_center134	ETS	AATCGGAAGTG	134	EGR1	ACGCCCACGCA	169	139	179	237	190	178	2.28128	3.58133	-1.30005	1.49347	-2.08786	0.787803
chr1_169337291_169337539_ETS1_HUMAN.H11MO.0.A_center134_to_FOSL1_MA0477.1	chr1_169337291_169337539	GAAATCTGTCCGCTTTTCACTTACGGAGGCCTTACAGTGTGTGTTCTGTGTTACTTGAGTTTATACGCACTGCAGAATTTGTTTACCCTGCTCTTTTGGAAACGTATTCCGGAAGCGAAACCCTGAGTAGTGACTCATGGTTAGGAGTGAGAGAGCTGCTGGATATGCGGAGGGACTGGGCGGGTCGGCTTCCGAATGGAAGAGGTCTGTGAGAAGTTAACCTGGTGATACCGATCCGAAGAGCCTATC	+	chr1_169337291_169337539_ETS1_HUMAN.H11MO.0.A_center134	ETS	ATCGGAAGT	134	AP-1	GTGACTCAT	246	252	230	677	644	503	3.31898	3.58133	-0.262353	1.49347	-2.08786	1.8255
chr1_169337291_169337539_ETS1_HUMAN.H11MO.0.A_center134_to_MAFK_MA0496.2	chr1_169337291_169337539	GAAATCTGTCCGCTTTTCACTTACGGAGGCCTTACAGTGTGTGTTCTGTGTTACTTGAGTTTATACGCACTGCAGAATTTGTTTACCCTGCTCTTTTGGAAACGTATTCCGGAAGCGAAACCCTGAGTGCTGAGTCAGCATTAGGAGTGAGAGAGCTGCTGGATATGCGGAGGGACTGGGCGGGTCGGCTTCCGAATGGAAGAGGTCTGTGAGAAGTTAACCTGGTGATACCGATCCGAAGAGCCTATC	+	chr1_169337291_169337539_ETS1_HUMAN.H11MO.0.A_center134	ETS	TAATCGGAAGTGG	134	MAF	TGCTGAGTCAGCA	162	156	143	167	145	212	2.07581	3.58133	-1.50552	1.49347	-2.08786	0.582335
chr1_169337291_169337539_ETS1_HUMAN.H11MO.0.A_center134_to_MECP2_HUMAN.H11MO.0.C	chr1_169337291_169337539	GAAATCTGTCCGCTTTTCACTTACGGAGGCCTTACAGTGTGTGTTCTGTGTTACTTGAGTTTATACGCACTGCAGAATTTGTTTACCCTGCTCTTTTGGAAACGTATTCCGGAAGCGAAACCCTGAGTAACCCGGAGTGGTTAGGAGTGAGAGAGCTGCTGGATATGCGGAGGGACTGGGCGGGTCGGCTTCCGAATGGAAGAGGTCTGTGAGAAGTTAACCTGGTGATACCGATCCGAAGAGCCTATC	+	chr1_169337291_169337539_ETS1_HUMAN.H11MO.0.A_center134	ETS	TCGGAAG	134	MECP2	CCCGGAG	293	311	326	208	207	318	1.5356	3.58133	-2.04573	1.49347	-2.08786	0.042126
chr1_169337291_169337539_ETS1_HUMAN.H11MO.0.A_center134_to_TP53_MA0106.3	chr1_169337291_169337539	GAAATCTGTCCGCTTTTCACTTACGGAGGCCTTACAGTGTGTGTTCTGTGTTACTTGAGTTTATACGCACTGCAGAATTTGTTTACCCTGCTCTTTTGGAAACGTATTCCGGAAGCGAAACCCTGAACATGCCCGGGCATGTAGGAGTGAGAGAGCTGCTGGATATGCGGAGGGACTGGGCGGGTCGGCTTCCGAATGGAAGAGGTCTGTGAGAAGTTAACCTGGTGATACCGATCCGAAGAGCCTATC	+	chr1_169337291_169337539_ETS1_HUMAN.H11MO.0.A_center134	ETS	GTAATCGGAAGTGGTT	134	P53	ACATGCCCGGGCATGT	117	121	99	1044	813	1273	5.1063	3.58133	1.52497	1.49347	-2.08786	3.61282
chr1_169337291_169337539_MECP2_HUMAN.H11MO.0.C_center111_to_CREB1_MA0018.3	chr1_169337291_169337539	GAAATCTGTCCGCTTTTCACTTACGGAGGCCTTACAGTGTGTGTTCTGTGTTACTTGAGTTTATACGCACTGCAGAATTTGTTTACCCTGCTCTTTTGGAAACGTATTGACGTCACGAAACCCTGAGTAATCGGAAGTGGTTAGGAGTGAGAGAGCTGCTGGATATGCGGAGGGACTGGGCGGGTCGGCTTCCGAATGGAAGAGGTCTGTGAGAAGTTAACCTGGTGATACCGATCCGAAGAGCCTATC	+	chr1_169337291_169337539_MECP2_HUMAN.H11MO.0.C_center111	MECP2	TCCGGAAG	111	CREB1	TGACGTCA	360	402	374	2086	1990	1506	4.29881	3.58133	0.717482	2.12579	-1.45554	2.17302
chr1_169337291_169337539_MECP2_HUMAN.H11MO.0.C_center111_to_E2F1_HUMAN.H11MO.0.A	chr1_169337291_169337539	GAAATCTGTCCGCTTTTCACTTACGGAGGCCTTACAGTGTGTGTTCTGTGTTACTTGAGTTTATACGCACTGCAGAATTTGTTTACCCTGCTCTTTTGGAAACGTATGGCGGGAACGAAACCCTGAGTAATCGGAAGTGGTTAGGAGTGAGAGAGCTGCTGGATATGCGGAGGGACTGGGCGGGTCGGCTTCCGAATGGAAGAGGTCTGTGAGAAGTTAACCTGGTGATACCGATCCGAAGAGCCTATC	+	chr1_169337291_169337539_MECP2_HUMAN.H11MO.0.C_center111	MECP2	TCCGGAAG	111	E2F1	GGCGGGAA	243	287	270	309	262	511	2.28349	3.58133	-1.29784	2.12579	-1.45554	0.157698
chr1_169337291_169337539_MECP2_HUMAN.H11MO.0.C_center111_to_EGR1_C2H2_1	chr1_169337291_169337539	GAAATCTGTCCGCTTTTCACTTACGGAGGCCTTACAGTGTGTGTTCTGTGTTACTTGAGTTTATACGCACTGCAGAATTTGTTTACCCTGCTCTTTTGGAAACGTACGCCCACGCAGAAACCCTGAGTAATCGGAAGTGGTTAGGAGTGAGAGAGCTGCTGGATATGCGGAGGGACTGGGCGGGTCGGCTTCCGAATGGAAGAGGTCTGTGAGAAGTTAACCTGGTGATACCGATCCGAAGAGCCTATC	+	chr1_169337291_169337539_MECP2_HUMAN.H11MO.0.C_center111	MECP2	ATTCCGGAAGC	111	EGR1	ACGCCCACGCA	219	254	245	877	706	827	3.68909	3.58133	0.10776	2.12579	-1.45554	1.5633
chr1_169337291_169337539_MECP2_HUMAN.H11MO.0.C_center111_to_FOSL1_MA0477.1	chr1_169337291_169337539	GAAATCTGTCCGCTTTTCACTTACGGAGGCCTTACAGTGTGTGTTCTGTGTTACTTGAGTTTATACGCACTGCAGAATTTGTTTACCCTGCTCTTTTGGAAACGTAGTGACTCATCGAAACCCTGAGTAATCGGAAGTGGTTAGGAGTGAGAGAGCTGCTGGATATGCGGAGGGACTGGGCGGGTCGGCTTCCGAATGGAAGAGGTCTGTGAGAAGTTAACCTGGTGATACCGATCCGAAGAGCCTATC	+	chr1_169337291_169337539_MECP2_HUMAN.H11MO.0.C_center111	MECP2	TTCCGGAAG	111	AP-1	GTGACTCAT	537	518	508	5143	4600	3564	5.0887	3.58133	1.50737	2.12579	-1.45554	2.96291
chr1_169337291_169337539_MECP2_HUMAN.H11MO.0.C_center111_to_MAFK_MA0496.2	chr1_169337291_169337539	GAAATCTGTCCGCTTTTCACTTACGGAGGCCTTACAGTGTGTGTTCTGTGTTACTTGAGTTTATACGCACTGCAGAATTTGTTTACCCTGCTCTTTTGGAAACGTGCTGAGTCAGCAAAACCCTGAGTAATCGGAAGTGGTTAGGAGTGAGAGAGCTGCTGGATATGCGGAGGGACTGGGCGGGTCGGCTTCCGAATGGAAGAGGTCTGTGAGAAGTTAACCTGGTGATACCGATCCGAAGAGCCTATC	+	chr1_169337291_169337539_MECP2_HUMAN.H11MO.0.C_center111	MECP2	TATTCCGGAAGCG	111	MAF	TGCTGAGTCAGCA	273	295	318	410	307	391	2.25278	3.58133	-1.32854	2.12579	-1.45554	0.126995
chr1_169337291_169337539_MECP2_HUMAN.H11MO.0.C_center111_to_TP53_MA0106.3	chr1_169337291_169337539	GAAATCTGTCCGCTTTTCACTTACGGAGGCCTTACAGTGTGTGTTCTGTGTTACTTGAGTTTATACGCACTGCAGAATTTGTTTACCCTGCTCTTTTGGAAACACATGCCCGGGCATGTACCCTGAGTAATCGGAAGTGGTTAGGAGTGAGAGAGCTGCTGGATATGCGGAGGGACTGGGCGGGTCGGCTTCCGAATGGAAGAGGTCTGTGAGAAGTTAACCTGGTGATACCGATCCGAAGAGCCTATC	+	chr1_169337291_169337539_MECP2_HUMAN.H11MO.0.C_center111	MECP2	GTATTCCGGAAGCGAA	111	P53	ACATGCCCGGGCATGT	137	154	131	1491	1159	1929	5.32163	3.58133	1.74031	2.12579	-1.45554	3.19584
chr1_172608036_172608284_FOSL1_MA0477.1_center115_to_CREB1_MA0018.3	chr1_172608036_172608284	AAGCACAAAACTATGCATGAGGTTATTTGAAAACCAAGTAAAAGGACATGGTTTGTGTCCTGTGGTTTGGGGGCTGGTTATTCATGAGTGTGAAATGTCTTACATTTTCAGTGACGTCAAGGAATGCAACTTTACCTGGTTGTGAGACATCAATACACTCATTCTGTTTGCATATTCATACACACACTCATGCATGAAAAAAGATGAAACACGTCCTTTATATCTACAGGCTGGGACTTATCTCTATGC	+	chr1_172608036_172608284_FOSL1_MA0477.1_center115	AP-1	TGAGTCAC	115	CREB1	TGACGTCA	57	48	61	18	18	29	0.50439	3.01511	-2.51072	0.236518	-2.77859	0.267872
chr1_172608036_172608284_FOSL1_MA0477.1_center115_to_E2F1_HUMAN.H11MO.0.A	chr1_172608036_172608284	AAGCACAAAACTATGCATGAGGTTATTTGAAAACCAAGTAAAAGGACATGGTTTGTGTCCTGTGGTTTGGGGGCTGGTTATTCATGAGTGTGAAATGTCTTACATTTTCAGGGCGGGAAAGGAATGCAACTTTACCTGGTTGTGAGACATCAATACACTCATTCTGTTTGCATATTCATACACACACTCATGCATGAAAAAAGATGAAACACGTCCTTTATATCTACAGGCTGGGACTTATCTCTATGC	+	chr1_172608036_172608284_FOSL1_MA0477.1_center115	AP-1	TGAGTCAC	115	E2F1	GGCGGGAA	76	88	68	23	16	35	0.196565	3.01511	-2.81854	0.236518	-2.77859	-0.0399528
chr1_172608036_172608284_FOSL1_MA0477.1_center115_to_EGR1_C2H2_1	chr1_172608036_172608284	AAGCACAAAACTATGCATGAGGTTATTTGAAAACCAAGTAAAAGGACATGGTTTGTGTCCTGTGGTTTGGGGGCTGGTTATTCATGAGTGTGAAATGTCTTACATTTTCACGCCCACGCAGGAATGCAACTTTACCTGGTTGTGAGACATCAATACACTCATTCTGTTTGCATATTCATACACACACTCATGCATGAAAAAAGATGAAACACGTCCTTTATATCTACAGGCTGGGACTTATCTCTATGC	+	chr1_172608036_172608284_FOSL1_MA0477.1_center115	AP-1	AGTGAGTCACA	115	EGR1	ACGCCCACGCA	154	184	189	122	122	118	1.41005	3.01511	-1.60506	0.236518	-2.77859	1.17353
chr1_172608036_172608284_FOSL1_MA0477.1_center115_to_ETS1_HUMAN.H11MO.0.A	chr1_172608036_172608284	AAGCACAAAACTATGCATGAGGTTATTTGAAAACCAAGTAAAAGGACATGGTTTGTGTCCTGTGGTTTGGGGGCTGGTTATTCATGAGTGTGAAATGTCTTACATTTTCAACCGGAAGTAGGAATGCAACTTTACCTGGTTGTGAGACATCAATACACTCATTCTGTTTGCATATTCATACACACACTCATGCATGAAAAAAGATGAAACACGTCCTTTATATCTACAGGCTGGGACTTATCTCTATGC	+	chr1_172608036_172608284_FOSL1_MA0477.1_center115	AP-1	GTGAGTCAC	115	ETS	ACCGGAAGT	184	157	165	61	63	92	0.646714	3.01511	-2.36839	0.236518	-2.77859	0.410196
chr1_172608036_172608284_FOSL1_MA0477.1_center115_to_MECP2_HUMAN.H11MO.0.C	chr1_172608036_172608284	AAGCACAAAACTATGCATGAGGTTATTTGAAAACCAAGTAAAAGGACATGGTTTGTGTCCTGTGGTTTGGGGGCTGGTTATTCATGAGTGTGAAATGTCTTACATTTTCAGCCCGGAGCAGGAATGCAACTTTACCTGGTTGTGAGACATCAATACACTCATTCTGTTTGCATATTCATACACACACTCATGCATGAAAAAAGATGAAACACGTCCTTTATATCTACAGGCTGGGACTTATCTCTATGC	+	chr1_172608036_172608284_FOSL1_MA0477.1_center115	AP-1	TGAGTCA	115	MECP2	CCCGGAG	65	65	89	17	25	37	0.386863	3.01511	-2.62825	0.236518	-2.77859	0.150345
chr1_172608036_172608284_FOSL1_MA0477.1_center115_to_TP53_MA0106.3	chr1_172608036_172608284	AAGCACAAAACTATGCATGAGGTTATTTGAAAACCAAGTAAAAGGACATGGTTTGTGTCCTGTGGTTTGGGGGCTGGTTATTCATGAGTGTGAAATGTCTTACATTTACATGCCCGGGCATGTATGCAACTTTACCTGGTTGTGAGACATCAATACACTCATTCTGTTTGCATATTCATACACACACTCATGCATGAAAAAAGATGAAACACGTCCTTTATATCTACAGGCTGGGACTTATCTCTATGC	+	chr1_172608036_172608284_FOSL1_MA0477.1_center115	AP-1	TCAGTGAGTCACAGGA	115	P53	ACATGCCCGGGCATGT	193	204	210	279	223	406	2.44409	3.01511	-0.571021	0.236518	-2.77859	2.20757
chr1_178622324_178622572_MAFK_MA0496.2_center120_to_CREB1_MA0018.3	chr1_178622324_178622572	GATTCTTCCGGGGATTCCTTGGTAGGGCTTTTTCCTTGACTGAGTCACAGCAGTGGGTTGAAGGTAGAGGATCCGAGGTGGTGGCCAACTCAGAGGCTATGTAAAGTGAAAGAACATGACGTCACAATGAGTGATACATAGTCACTAAGTGCCCTGTGCCCAGCTTGGCCTTTGTACCAAGGCCTCCTCTGTGCCCTCTGCCAGTAGGGTGAGGAAGCCATAATCATACAGGCCAGAACGCAAGCACTA	-	chr1_178622324_178622572_MAFK_MA0496.2_center120	MAF	TGACTCAA	120	CREB1	TGACGTCA	156	136	109	110	97	132	1.65418	2.83828	-1.1841	0.904215	-1.93406	0.74996
chr1_178622324_178622572_MAFK_MA0496.2_center120_to_E2F1_HUMAN.H11MO.0.A	chr1_178622324_178622572	GATTCTTCCGGGGATTCCTTGGTAGGGCTTTTTCCTTGACTGAGTCACAGCAGTGGGTTGAAGGTAGAGGATCCGAGGTGGTGGCCAACTCAGAGGCTATGTAAAGTGAAAGAACAGGCGGGAACAATGAGTGATACATAGTCACTAAGTGCCCTGTGCCCAGCTTGGCCTTTGTACCAAGGCCTCCTCTGTGCCCTCTGCCAGTAGGGTGAGGAAGCCATAATCATACAGGCCAGAACGCAAGCACTA	-	chr1_178622324_178622572_MAFK_MA0496.2_center120	MAF	TGACTCAA	120	E2F1	GGCGGGAA	172	219	217	88	83	161	0.97159	2.83828	-1.86669	0.904215	-1.93406	0.0673746
chr1_178622324_178622572_MAFK_MA0496.2_center120_to_EGR1_C2H2_1	chr1_178622324_178622572	GATTCTTCCGGGGATTCCTTGGTAGGGCTTTTTCCTTGACTGAGTCACAGCAGTGGGTTGAAGGTAGAGGATCCGAGGTGGTGGCCAACTCAGAGGCTATGTAAAGTGAAAGAAACGCCCACGCAAATGAGTGATACATAGTCACTAAGTGCCCTGTGCCCAGCTTGGCCTTTGTACCAAGGCCTCCTCTGTGCCCTCTGCCAGTAGGGTGAGGAAGCCATAATCATACAGGCCAGAACGCAAGCACTA	-	chr1_178622324_178622572_MAFK_MA0496.2_center120	MAF	CATGACTCAAC	120	EGR1	ACGCCCACGCA	244	267	258	265	283	301	2.08222	2.83828	-0.75606	0.904215	-1.93406	1.178
chr1_178622324_178622572_MAFK_MA0496.2_center120_to_ETS1_HUMAN.H11MO.0.A	chr1_178622324_178622572	GATTCTTCCGGGGATTCCTTGGTAGGGCTTTTTCCTTGACTGAGTCACAGCAGTGGGTTGAAGGTAGAGGATCCGAGGTGGTGGCCAACTCAGAGGCTATGTAAAGTGAAAGAACACCGGAAGTCAATGAGTGATACATAGTCACTAAGTGCCCTGTGCCCAGCTTGGCCTTTGTACCAAGGCCTCCTCTGTGCCCTCTGCCAGTAGGGTGAGGAAGCCATAATCATACAGGCCAGAACGCAAGCACTA	-	chr1_178622324_178622572_MAFK_MA0496.2_center120	MAF	ATGACTCAA	120	ETS	ACCGGAAGT	407	428	451	405	339	393	1.76105	2.83828	-1.07722	0.904215	-1.93406	0.856837
chr1_178622324_178622572_MAFK_MA0496.2_center120_to_MECP2_HUMAN.H11MO.0.C	chr1_178622324_178622572	GATTCTTCCGGGGATTCCTTGGTAGGGCTTTTTCCTTGACTGAGTCACAGCAGTGGGTTGAAGGTAGAGGATCCGAGGTGGTGGCCAACTCAGAGGCTATGTAAAGTGAAAGAACACCCGGAGACAATGAGTGATACATAGTCACTAAGTGCCCTGTGCCCAGCTTGGCCTTTGTACCAAGGCCTCCTCTGTGCCCTCTGCCAGTAGGGTGAGGAAGCCATAATCATACAGGCCAGAACGCAAGCACTA	-	chr1_178622324_178622572_MAFK_MA0496.2_center120	MAF	TGACTCA	120	MECP2	CCCGGAG	94	78	86	42	32	55	0.864442	2.83828	-1.97383	0.904215	-1.93406	-0.0397727
chr1_178622324_178622572_MAFK_MA0496.2_center120_to_TP53_MA0106.3	chr1_178622324_178622572	GATTCTTCCGGGGATTCCTTGGTAGGGCTTTTTCCTTGACTGAGTCACAGCAGTGGGTTGAAGGTAGAGGATCCGAGGTGGTGGCCAACTCAGAGGCTATGTAAAGTGAAAGACATGCCCGGGCATGTGAGTGATACATAGTCACTAAGTGCCCTGTGCCCAGCTTGGCCTTTGTACCAAGGCCTCCTCTGTGCCCTCTGCCAGTAGGGTGAGGAAGCCATAATCATACAGGCCAGAACGCAAGCACTA	-	chr1_178622324_178622572_MAFK_MA0496.2_center120	MAF	AACATGACTCAACAAT	120	P53	ACATGCCCGGGCATGT	149	170	144	483	405	608	3.58663	2.83828	0.748351	0.904215	-1.93406	2.68241
chr1_181104162_181104410_TP53_MA0106.3_center127_to_E2F1_HUMAN.H11MO.0.A	chr1_181104162_181104410	GGGAGGGGCAGGCAAGGACAGAGAGCAGCGAGACTGTAGTGGGGTGTTTCTGCCTGTGTGTCCCTGGGTGTCTGCATCTGCGTGGCAGCAGCCCAGCATGAGGCTGAGGGTGAGGGAGGCATGGGCGGGAATGTCTGCTGGGGCAGGCTGGCCAGGTTCCTGAGAAGACCAAGGAGATCCTTGGGAGAGGTGACTGGATCTGAGGCATGGAGAGAACGCCCGAGTCGGGAGGGAGGCGAGCCGGAGCAG	+	chr1_181104162_181104410_TP53_MA0106.3_center127	P53	CCCGGGCA	127	E2F1	GGCGGGAA	76	80	85	13	11	30	-0.332637	4.59916	-4.9318	0.457366	-4.1418	-0.790004
chr1_181104162_181104410_TP53_MA0106.3_center127_to_EGR1_C2H2_1	chr1_181104162_181104410	GGGAGGGGCAGGCAAGGACAGAGAGCAGCGAGACTGTAGTGGGGTGTTTCTGCCTGTGTGTCCCTGGGTGTCTGCATCTGCGTGGCAGCAGCCCAGCATGAGGCTGAGGGTGAGGGAGGCAACGCCCACGCAGTCTGCTGGGGCAGGCTGGCCAGGTTCCTGAGAAGACCAAGGAGATCCTTGGGAGAGGTGACTGGATCTGAGGCATGGAGAGAACGCCCGAGTCGGGAGGGAGGCGAGCCGGAGCAG	+	chr1_181104162_181104410_TP53_MA0106.3_center127	P53	TGCCCGGGCAT	127	EGR1	ACGCCCACGCA	130	141	148	81	54	110	1.08218	4.59916	-3.51698	0.457366	-4.1418	0.624815
chr1_181104162_181104410_TP53_MA0106.3_center127_to_ETS1_HUMAN.H11MO.0.A	chr1_181104162_181104410	GGGAGGGGCAGGCAAGGACAGAGAGCAGCGAGACTGTAGTGGGGTGTTTCTGCCTGTGTGTCCCTGGGTGTCTGCATCTGCGTGGCAGCAGCCCAGCATGAGGCTGAGGGTGAGGGAGGCATACCGGAAGTTGTCTGCTGGGGCAGGCTGGCCAGGTTCCTGAGAAGACCAAGGAGATCCTTGGGAGAGGTGACTGGATCTGAGGCATGGAGAGAACGCCCGAGTCGGGAGGGAGGCGAGCCGGAGCAG	+	chr1_181104162_181104410_TP53_MA0106.3_center127	P53	GCCCGGGCA	127	ETS	ACCGGAAGT	103	101	113	87	80	160	1.88283	4.59916	-2.71633	0.457366	-4.1418	1.42546
chr1_181104162_181104410_TP53_MA0106.3_center127_to_FOSL1_MA0477.1	chr1_181104162_181104410	GGGAGGGGCAGGCAAGGACAGAGAGCAGCGAGACTGTAGTGGGGTGTTTCTGCCTGTGTGTCCCTGGGTGTCTGCATCTGCGTGGCAGCAGCCCAGCATGAGGCTGAGGGTGAGGGAGGCATGTGACTCATTGTCTGCTGGGGCAGGCTGGCCAGGTTCCTGAGAAGACCAAGGAGATCCTTGGGAGAGGTGACTGGATCTGAGGCATGGAGAGAACGCCCGAGTCGGGAGGGAGGCGAGCCGGAGCAG	+	chr1_181104162_181104410_TP53_MA0106.3_center127	P53	GCCCGGGCA	127	AP-1	GTGACTCAT	332	314	361	133	117	249	0.815998	4.59916	-3.78316	0.457366	-4.1418	0.358632
chr1_181104162_181104410_TP53_MA0106.3_center127_to_MAFK_MA0496.2	chr1_181104162_181104410	GGGAGGGGCAGGCAAGGACAGAGAGCAGCGAGACTGTAGTGGGGTGTTTCTGCCTGTGTGTCCCTGGGTGTCTGCATCTGCGTGGCAGCAGCCCAGCATGAGGCTGAGGGTGAGGGAGGCTGCTGAGTCAGCATCTGCTGGGGCAGGCTGGCCAGGTTCCTGAGAAGACCAAGGAGATCCTTGGGAGAGGTGACTGGATCTGAGGCATGGAGAGAACGCCCGAGTCGGGAGGGAGGCGAGCCGGAGCAG	+	chr1_181104162_181104410_TP53_MA0106.3_center127	P53	ATGCCCGGGCATG	127	MAF	TGCTGAGTCAGCA	340	377	346	184	131	342	1.1135	4.59916	-3.48566	0.457366	-4.1418	0.656136
chr1_182730544_182730792_TP53_MA0106.3_center161_to_E2F1_HUMAN.H11MO.0.A	chr1_182730544_182730792	AAGGACTGAACATCTCATTTGCATAAGGTGTGAATTTCTGGTAGCTCCACCCTGTCCTCCTAGTGCATATGCAGGCCCCTAGCTTGAGCTACTCCATATTGCTTTGTTCCCCTTACTGTACATGTGTCAGGGGATGTAATTTTCCATTGCGGGCATGGGCGGGAAAGTCCCCTGTGTAGCCTTTCTTATTTGTGTGGCTGGGAGCATGTCTTAGGCAAGTCCCCCTGTGCAAGTTCCCTTATCTATGCC	+	chr1_182730544_182730792_TP53_MA0106.3_center161	P53	TCTGGGCA	161	E2F1	GGCGGGAA	326	353	348	63	64	116	-0.231179	2.7827	-3.01388	-0.502239	-3.28494	0.27106
chr1_182730544_182730792_TP53_MA0106.3_center161_to_EGR1_C2H2_1	chr1_182730544_182730792	AAGGACTGAACATCTCATTTGCATAAGGTGTGAATTTCTGGTAGCTCCACCCTGTCCTCCTAGTGCATATGCAGGCCCCTAGCTTGAGCTACTCCATATTGCTTTGTTCCCCTTACTGTACATGTGTCAGGGGATGTAATTTTCCATTGCGGGCAACGCCCACGCAGTCCCCTGTGTAGCCTTTCTTATTTGTGTGGCTGGGAGCATGTCTTAGGCAAGTCCCCCTGTGCAAGTTCCCTTATCTATGCC	+	chr1_182730544_182730792_TP53_MA0106.3_center161	P53	TGTCTGGGCAA	161	EGR1	ACGCCCACGCA	907	942	894	291	307	539	0.580236	2.7827	-2.20247	-0.502239	-3.28494	1.08248
chr1_182730544_182730792_TP53_MA0106.3_center161_to_ETS1_HUMAN.H11MO.0.A	chr1_182730544_182730792	AAGGACTGAACATCTCATTTGCATAAGGTGTGAATTTCTGGTAGCTCCACCCTGTCCTCCTAGTGCATATGCAGGCCCCTAGCTTGAGCTACTCCATATTGCTTTGTTCCCCTTACTGTACATGTGTCAGGGGATGTAATTTTCCATTGCGGGCATACCGGAAGTAGTCCCCTGTGTAGCCTTTCTTATTTGTGTGGCTGGGAGCATGTCTTAGGCAAGTCCCCCTGTGCAAGTTCCCTTATCTATGCC	+	chr1_182730544_182730792_TP53_MA0106.3_center161	P53	GTCTGGGCA	161	ETS	ACCGGAAGT	639	687	695	313	261	472	0.911515	2.7827	-1.87119	-0.502239	-3.28494	1.41375
chr1_182730544_182730792_TP53_MA0106.3_center161_to_FOSL1_MA0477.1	chr1_182730544_182730792	AAGGACTGAACATCTCATTTGCATAAGGTGTGAATTTCTGGTAGCTCCACCCTGTCCTCCTAGTGCATATGCAGGCCCCTAGCTTGAGCTACTCCATATTGCTTTGTTCCCCTTACTGTACATGTGTCAGGGGATGTAATTTTCCATTGCGGGCATGTGACTCATAGTCCCCTGTGTAGCCTTTCTTATTTGTGTGGCTGGGAGCATGTCTTAGGCAAGTCCCCCTGTGCAAGTTCCCTTATCTATGCC	+	chr1_182730544_182730792_TP53_MA0106.3_center161	P53	GTCTGGGCA	161	AP-1	GTGACTCAT	1085	1198	1186	588	529	815	1.04241	2.7827	-1.74029	-0.502239	-3.28494	1.54465
chr1_182730544_182730792_TP53_MA0106.3_center161_to_MAFK_MA0496.2	chr1_182730544_182730792	AAGGACTGAACATCTCATTTGCATAAGGTGTGAATTTCTGGTAGCTCCACCCTGTCCTCCTAGTGCATATGCAGGCCCCTAGCTTGAGCTACTCCATATTGCTTTGTTCCCCTTACTGTACATGTGTCAGGGGATGTAATTTTCCATTGCGGGCTGCTGAGTCAGCATCCCCTGTGTAGCCTTTCTTATTTGTGTGGCTGGGAGCATGTCTTAGGCAAGTCCCCCTGTGCAAGTTCCCTTATCTATGCC	+	chr1_182730544_182730792_TP53_MA0106.3_center161	P53	ATGTCTGGGCAAG	161	MAF	TGCTGAGTCAGCA	574	549	560	204	165	293	0.518053	2.7827	-2.26465	-0.502239	-3.28494	1.02029
chr1_187607937_187608185_TP53_MA0106.3_center123_to_E2F1_HUMAN.H11MO.0.A	chr1_187607937_187608185	TAGATAAGGTAGGCACATAAGGGAGGTGAGAAGAGAGAGAAAGGGGGTCATTTACGGGGGACTAGGAAGGTGACCTATTCCCTAATAAGGAAAGGAATGTGGACTGGGGTTGTAGCAAGGGCGGGAATGCCTAGGCATATTCAGACAAGTTGGGGCACAGCAAAGGGAAAGGGGTATTTGGAATTATAGGATAAAGAATGGGGAAACTGGATAAGCTGTTTGAAGAGGAAACCTAACTGTATCTAACAA	-	chr1_187607937_187608185_TP53_MA0106.3_center123	P53	TTCAGGCA	123	E2F1	GGCGGGAA	79	75	66	23	17	24	0.0946616	2.86673	-2.77207	-0.706329	-3.57306	0.800991
chr1_187607937_187608185_TP53_MA0106.3_center123_to_EGR1_C2H2_1	chr1_187607937_187608185	TAGATAAGGTAGGCACATAAGGGAGGTGAGAAGAGAGAGAAAGGGGGTCATTTACGGGGGACTAGGAAGGTGACCTATTCCCTAATAAGGAAAGGAATGTGGACTGGGGTTGTAGCAACGCCCACGCAGCCTAGGCATATTCAGACAAGTTGGGGCACAGCAAAGGGAAAGGGGTATTTGGAATTATAGGATAAAGAATGGGGAAACTGGATAAGCTGTTTGAAGAGGAAACCTAACTGTATCTAACAA	-	chr1_187607937_187608185_TP53_MA0106.3_center123	P53	AGTTCAGGCAT	123	EGR1	ACGCCCACGCA	97	104	90	82	58	63	1.41871	2.86673	-1.44802	-0.706329	-3.57306	2.12504
chr1_187607937_187608185_TP53_MA0106.3_center123_to_ETS1_HUMAN.H11MO.0.A	chr1_187607937_187608185	TAGATAAGGTAGGCACATAAGGGAGGTGAGAAGAGAGAGAAAGGGGGTCATTTACGGGGGACTAGGAAGGTGACCTATTCCCTAATAAGGAAAGGAATGTGGACTGGGGTTGTAGCAAACCGGAAGTTGCCTAGGCATATTCAGACAAGTTGGGGCACAGCAAAGGGAAAGGGGTATTTGGAATTATAGGATAAAGAATGGGGAAACTGGATAAGCTGTTTGAAGAGGAAACCTAACTGTATCTAACAA	-	chr1_187607937_187608185_TP53_MA0106.3_center123	P53	GTTCAGGCA	123	ETS	ACCGGAAGT	65	49	67	46	47	51	1.58148	2.86673	-1.28525	-0.706329	-3.57306	2.28781
chr1_187607937_187608185_TP53_MA0106.3_center123_to_FOSL1_MA0477.1	chr1_187607937_187608185	TAGATAAGGTAGGCACATAAGGGAGGTGAGAAGAGAGAGAAAGGGGGTCATTTACGGGGGACTAGGAAGGTGACCTATTCCCTAATAAGGAAAGGAATGTGGACTGGGGTTGTAGCAAGTGACTCATTGCCTAGGCATATTCAGACAAGTTGGGGCACAGCAAAGGGAAAGGGGTATTTGGAATTATAGGATAAAGAATGGGGAAACTGGATAAGCTGTTTGAAGAGGAAACCTAACTGTATCTAACAA	-	chr1_187607937_187608185_TP53_MA0106.3_center123	P53	GTTCAGGCA	123	AP-1	GTGACTCAT	74	93	107	213	198	163	3.05369	2.86673	0.186967	-0.706329	-3.57306	3.76002
chr1_187607937_187608185_TP53_MA0106.3_center123_to_MAFK_MA0496.2	chr1_187607937_187608185	TAGATAAGGTAGGCACATAAGGGAGGTGAGAAGAGAGAGAAAGGGGGTCATTTACGGGGGACTAGGAAGGTGACCTATTCCCTAATAAGGAAAGGAATGTGGACTGGGGTTGTAGCTGCTGAGTCAGCACCTAGGCATATTCAGACAAGTTGGGGCACAGCAAAGGGAAAGGGGTATTTGGAATTATAGGATAAAGAATGGGGAAACTGGATAAGCTGTTTGAAGAGGAAACCTAACTGTATCTAACAA	-	chr1_187607937_187608185_TP53_MA0106.3_center123	P53	AAGTTCAGGCATG	123	MAF	TGCTGAGTCAGCA	73	106	73	63	58	39	1.33431	2.86673	-1.53242	-0.706329	-3.57306	2.04064
chr1_187607937_187608185_TP53_MA0106.3_center133_to_E2F1_HUMAN.H11MO.0.A	chr1_187607937_187608185	TAGATAAGGTAGGCACATAAGGGAGGTGAGAAGAGAGAGAAAGGGGGTCATTTACGGGGGACTAGGAAGGTGACCTATTCCCTAATAAGGAAAGGAATGTGGACTGGGGTTGTAGCAAGTTCAGGCATGGGCGGGAATATTCAGACAAGTTGGGGCACAGCAAAGGGAAAGGGGTATTTGGAATTATAGGATAAAGAATGGGGAAACTGGATAAGCTGTTTGAAGAGGAAACCTAACTGTATCTAACAA	-	chr1_187607937_187608185_TP53_MA0106.3_center133	P53	CCTAGGCA	133	E2F1	GGCGGGAA	190	202	187	39	30	53	-0.384063	2.86673	-3.25079	-0.702713	-3.56944	0.31865
chr1_187607937_187608185_TP53_MA0106.3_center133_to_EGR1_C2H2_1	chr1_187607937_187608185	TAGATAAGGTAGGCACATAAGGGAGGTGAGAAGAGAGAGAAAGGGGGTCATTTACGGGGGACTAGGAAGGTGACCTATTCCCTAATAAGGAAAGGAATGTGGACTGGGGTTGTAGCAAGTTCAGGCAACGCCCACGCAATTCAGACAAGTTGGGGCACAGCAAAGGGAAAGGGGTATTTGGAATTATAGGATAAAGAATGGGGAAACTGGATAAGCTGTTTGAAGAGGAAACCTAACTGTATCTAACAA	-	chr1_187607937_187608185_TP53_MA0106.3_center133	P53	TGCCTAGGCAT	133	EGR1	ACGCCCACGCA	61	66	61	38	35	29	1.05652	2.86673	-1.81021	-0.702713	-3.56944	1.75923
chr1_187607937_187608185_TP53_MA0106.3_center133_to_ETS1_HUMAN.H11MO.0.A	chr1_187607937_187608185	TAGATAAGGTAGGCACATAAGGGAGGTGAGAAGAGAGAGAAAGGGGGTCATTTACGGGGGACTAGGAAGGTGACCTATTCCCTAATAAGGAAAGGAATGTGGACTGGGGTTGTAGCAAGTTCAGGCATACCGGAAGTTATTCAGACAAGTTGGGGCACAGCAAAGGGAAAGGGGTATTTGGAATTATAGGATAAAGAATGGGGAAACTGGATAAGCTGTTTGAAGAGGAAACCTAACTGTATCTAACAA	-	chr1_187607937_187608185_TP53_MA0106.3_center133	P53	GCCTAGGCA	133	ETS	ACCGGAAGT	116	88	105	71	58	69	1.27265	2.86673	-1.59408	-0.702713	-3.56944	1.97536
chr1_187607937_187608185_TP53_MA0106.3_center133_to_FOSL1_MA0477.1	chr1_187607937_187608185	TAGATAAGGTAGGCACATAAGGGAGGTGAGAAGAGAGAGAAAGGGGGTCATTTACGGGGGACTAGGAAGGTGACCTATTCCCTAATAAGGAAAGGAATGTGGACTGGGGTTGTAGCAAGTTCAGGCATGTGACTCATTATTCAGACAAGTTGGGGCACAGCAAAGGGAAAGGGGTATTTGGAATTATAGGATAAAGAATGGGGAAACTGGATAAGCTGTTTGAAGAGGAAACCTAACTGTATCTAACAA	-	chr1_187607937_187608185_TP53_MA0106.3_center133	P53	GCCTAGGCA	133	AP-1	GTGACTCAT	67	66	59	76	70	55	2.03582	2.86673	-0.830906	-0.702713	-3.56944	2.73853
chr1_187607937_187608185_TP53_MA0106.3_center133_to_MAFK_MA0496.2	chr1_187607937_187608185	TAGATAAGGTAGGCACATAAGGGAGGTGAGAAGAGAGAGAAAGGGGGTCATTTACGGGGGACTAGGAAGGTGACCTATTCCCTAATAAGGAAAGGAATGTGGACTGGGGTTGTAGCAAGTTCAGGCTGCTGAGTCAGCATTCAGACAAGTTGGGGCACAGCAAAGGGAAAGGGGTATTTGGAATTATAGGATAAAGAATGGGGAAACTGGATAAGCTGTTTGAAGAGGAAACCTAACTGTATCTAACAA	-	chr1_187607937_187608185_TP53_MA0106.3_center133	P53	ATGCCTAGGCATA	133	MAF	TGCTGAGTCAGCA	33	28	35	22	12	5	0.741427	2.86673	-2.1253	-0.702713	-3.56944	1.44414
chr1_187607937_187608185_TP53_MA0106.3_center143_to_E2F1_HUMAN.H11MO.0.A	chr1_187607937_187608185	TAGATAAGGTAGGCACATAAGGGAGGTGAGAAGAGAGAGAAAGGGGGTCATTTACGGGGGACTAGGAAGGTGACCTATTCCCTAATAAGGAAAGGAATGTGGACTGGGGTTGTAGCAAGTTCAGGCATGCCTAGGCATAGGCGGGAAAGTTGGGGCACAGCAAAGGGAAAGGGGTATTTGGAATTATAGGATAAAGAATGGGGAAACTGGATAAGCTGTTTGAAGAGGAAACCTAACTGTATCTAACAA	-	chr1_187607937_187608185_TP53_MA0106.3_center143	P53	TTCAGACA	143	E2F1	GGCGGGAA	72	85	72	66	56	88	1.75225	2.86673	-1.11448	1.0367	-1.83003	0.715545
chr1_187607937_187608185_TP53_MA0106.3_center143_to_EGR1_C2H2_1	chr1_187607937_187608185	TAGATAAGGTAGGCACATAAGGGAGGTGAGAAGAGAGAGAAAGGGGGTCATTTACGGGGGACTAGGAAGGTGACCTATTCCCTAATAAGGAAAGGAATGTGGACTGGGGTTGTAGCAAGTTCAGGCATGCCTAGGCAACGCCCACGCAGTTGGGGCACAGCAAAGGGAAAGGGGTATTTGGAATTATAGGATAAAGAATGGGGAAACTGGATAAGCTGTTTGAAGAGGAAACCTAACTGTATCTAACAA	-	chr1_187607937_187608185_TP53_MA0106.3_center143	P53	TATTCAGACAA	143	EGR1	ACGCCCACGCA	229	203	225	379	299	414	2.64267	2.86673	-0.224058	1.0367	-1.83003	1.60597
chr1_187607937_187608185_TP53_MA0106.3_center143_to_ETS1_HUMAN.H11MO.0.A	chr1_187607937_187608185	TAGATAAGGTAGGCACATAAGGGAGGTGAGAAGAGAGAGAAAGGGGGTCATTTACGGGGGACTAGGAAGGTGACCTATTCCCTAATAAGGAAAGGAATGTGGACTGGGGTTGTAGCAAGTTCAGGCATGCCTAGGCATACCGGAAGTAGTTGGGGCACAGCAAAGGGAAAGGGGTATTTGGAATTATAGGATAAAGAATGGGGAAACTGGATAAGCTGTTTGAAGAGGAAACCTAACTGTATCTAACAA	-	chr1_187607937_187608185_TP53_MA0106.3_center143	P53	ATTCAGACA	143	ETS	ACCGGAAGT	68	60	60	108	95	114	2.67126	2.86673	-0.195468	1.0367	-1.83003	1.63456
chr1_187607937_187608185_TP53_MA0106.3_center143_to_FOSL1_MA0477.1	chr1_187607937_187608185	TAGATAAGGTAGGCACATAAGGGAGGTGAGAAGAGAGAGAAAGGGGGTCATTTACGGGGGACTAGGAAGGTGACCTATTCCCTAATAAGGAAAGGAATGTGGACTGGGGTTGTAGCAAGTTCAGGCATGCCTAGGCATGTGACTCATAGTTGGGGCACAGCAAAGGGAAAGGGGTATTTGGAATTATAGGATAAAGAATGGGGAAACTGGATAAGCTGTTTGAAGAGGAAACCTAACTGTATCTAACAA	-	chr1_187607937_187608185_TP53_MA0106.3_center143	P53	ATTCAGACA	143	AP-1	GTGACTCAT	28	39	39	71	65	91	2.99202	2.86673	0.125296	1.0367	-1.83003	1.95532
chr1_187607937_187608185_TP53_MA0106.3_center143_to_MAFK_MA0496.2	chr1_187607937_187608185	TAGATAAGGTAGGCACATAAGGGAGGTGAGAAGAGAGAGAAAGGGGGTCATTTACGGGGGACTAGGAAGGTGACCTATTCCCTAATAAGGAAAGGAATGTGGACTGGGGTTGTAGCAAGTTCAGGCATGCCTAGGCTGCTGAGTCAGCATTGGGGCACAGCAAAGGGAAAGGGGTATTTGGAATTATAGGATAAAGAATGGGGAAACTGGATAAGCTGTTTGAAGAGGAAACCTAACTGTATCTAACAA	-	chr1_187607937_187608185_TP53_MA0106.3_center143	P53	ATATTCAGACAAG	143	MAF	TGCTGAGTCAGCA	179	159	169	265	220	265	2.49278	2.86673	-0.373944	1.0367	-1.83003	1.45608
chr1_19337580_19337828_CREB1_MA0018.3_center54_to_E2F1_HUMAN.H11MO.0.A	chr1_19337580_19337828	CAGAAAGTTCAGAGGAAATTTACCGCAAGGCAGAGCGTTTACCAGCCGATGGCGGGAACTCCGCGGCAGTGAAAGGCTTTGCAGAAAAGCACTGAAAAGAAAATACTTTCGCAATGAATGAGCTGGGCCCGCCTGGCTCGGGCTGACTCACCAAGAAGTCTTCACTTTATAAGGACTTTACTGGGGCTCCCATAGGCATGCCTTTTTGCCCTGTATCTAGGTCTGGACAAGGGTAAGTGGTTGAACACA	-	chr1_19337580_19337828_CREB1_MA0018.3_center54	CREB1	GACTTCAC	54	E2F1	GGCGGGAA	452	533	466	437	414	523	1.83981	3.42941	-1.5896	1.49376	-1.93565	0.346054
chr1_19337580_19337828_CREB1_MA0018.3_center54_to_EGR1_C2H2_1	chr1_19337580_19337828	CAGAAAGTTCAGAGGAAATTTACCGCAAGGCAGAGCGTTTACCAGCCGACGCCCACGCATCCGCGGCAGTGAAAGGCTTTGCAGAAAAGCACTGAAAAGAAAATACTTTCGCAATGAATGAGCTGGGCCCGCCTGGCTCGGGCTGACTCACCAAGAAGTCTTCACTTTATAAGGACTTTACTGGGGCTCCCATAGGCATGCCTTTTTGCCCTGTATCTAGGTCTGGACAAGGGTAAGTGGTTGAACACA	-	chr1_19337580_19337828_CREB1_MA0018.3_center54	CREB1	ATGACTTCACC	54	EGR1	ACGCCCACGCA	239	228	229	776	624	571	3.47877	3.42941	0.0493608	1.49376	-1.93565	1.98501
chr1_19337580_19337828_CREB1_MA0018.3_center54_to_ETS1_HUMAN.H11MO.0.A	chr1_19337580_19337828	CAGAAAGTTCAGAGGAAATTTACCGCAAGGCAGAGCGTTTACCAGCCGAACCGGAAGTCTCCGCGGCAGTGAAAGGCTTTGCAGAAAAGCACTGAAAAGAAAATACTTTCGCAATGAATGAGCTGGGCCCGCCTGGCTCGGGCTGACTCACCAAGAAGTCTTCACTTTATAAGGACTTTACTGGGGCTCCCATAGGCATGCCTTTTTGCCCTGTATCTAGGTCTGGACAAGGGTAAGTGGTTGAACACA	-	chr1_19337580_19337828_CREB1_MA0018.3_center54	CREB1	TGACTTCAC	54	ETS	ACCGGAAGT	480	475	515	1104	924	822	2.93692	3.42941	-0.492491	1.49376	-1.93565	1.44316
chr1_19337580_19337828_CREB1_MA0018.3_center54_to_FOSL1_MA0477.1	chr1_19337580_19337828	CAGAAAGTTCAGAGGAAATTTACCGCAAGGCAGAGCGTTTACCAGCCGAGTGACTCATCTCCGCGGCAGTGAAAGGCTTTGCAGAAAAGCACTGAAAAGAAAATACTTTCGCAATGAATGAGCTGGGCCCGCCTGGCTCGGGCTGACTCACCAAGAAGTCTTCACTTTATAAGGACTTTACTGGGGCTCCCATAGGCATGCCTTTTTGCCCTGTATCTAGGTCTGGACAAGGGTAAGTGGTTGAACACA	-	chr1_19337580_19337828_CREB1_MA0018.3_center54	CREB1	TGACTTCAC	54	AP-1	GTGACTCAT	251	265	237	1175	995	958	4.02329	3.42941	0.593878	1.49376	-1.93565	2.52953
chr1_19337580_19337828_CREB1_MA0018.3_center54_to_MAFK_MA0496.2	chr1_19337580_19337828	CAGAAAGTTCAGAGGAAATTTACCGCAAGGCAGAGCGTTTACCAGCCTGCTGAGTCAGCACCGCGGCAGTGAAAGGCTTTGCAGAAAAGCACTGAAAAGAAAATACTTTCGCAATGAATGAGCTGGGCCCGCCTGGCTCGGGCTGACTCACCAAGAAGTCTTCACTTTATAAGGACTTTACTGGGGCTCCCATAGGCATGCCTTTTTGCCCTGTATCTAGGTCTGGACAAGGGTAAGTGGTTGAACACA	-	chr1_19337580_19337828_CREB1_MA0018.3_center54	CREB1	GATGACTTCACCT	54	MAF	TGCTGAGTCAGCA	238	231	225	441	386	293	2.68899	3.42941	-0.740418	1.49376	-1.93565	1.19523
chr1_19337580_19337828_CREB1_MA0018.3_center54_to_MECP2_HUMAN.H11MO.0.C	chr1_19337580_19337828	CAGAAAGTTCAGAGGAAATTTACCGCAAGGCAGAGCGTTTACCAGCCGATCCCGGAGCCTCCGCGGCAGTGAAAGGCTTTGCAGAAAAGCACTGAAAAGAAAATACTTTCGCAATGAATGAGCTGGGCCCGCCTGGCTCGGGCTGACTCACCAAGAAGTCTTCACTTTATAAGGACTTTACTGGGGCTCCCATAGGCATGCCTTTTTGCCCTGTATCTAGGTCTGGACAAGGGTAAGTGGTTGAACACA	-	chr1_19337580_19337828_CREB1_MA0018.3_center54	CREB1	GACTTCA	54	MECP2	CCCGGAG	497	540	532	477	433	480	1.76781	3.42941	-1.6616	1.49376	-1.93565	0.274046
chr1_19337580_19337828_CREB1_MA0018.3_center54_to_TP53_MA0106.3	chr1_19337580_19337828	CAGAAAGTTCAGAGGAAATTTACCGCAAGGCAGAGCGTTTACCAGCACATGCCCGGGCATGTGCGGCAGTGAAAGGCTTTGCAGAAAAGCACTGAAAAGAAAATACTTTCGCAATGAATGAGCTGGGCCCGCCTGGCTCGGGCTGACTCACCAAGAAGTCTTCACTTTATAAGGACTTTACTGGGGCTCCCATAGGCATGCCTTTTTGCCCTGTATCTAGGTCTGGACAAGGGTAAGTGGTTGAACACA	-	chr1_19337580_19337828_CREB1_MA0018.3_center54	CREB1	CGATGACTTCACCTCC	54	P53	ACATGCCCGGGCATGT	213	216	212	1327	1128	1424	4.52219	3.42941	1.09278	1.49376	-1.93565	3.02843
chr1_19337580_19337828_EGR1_C2H2_1_center60_to_CREB1_MA0018.3	chr1_19337580_19337828	CAGAAAGTTCAGAGGAAATTTACCGCAAGGCAGAGCGTTTACCAGCCGATGACTTCTGACGTCAGGCAGTGAAAGGCTTTGCAGAAAAGCACTGAAAAGAAAATACTTTCGCAATGAATGAGCTGGGCCCGCCTGGCTCGGGCTGACTCACCAAGAAGTCTTCACTTTATAAGGACTTTACTGGGGCTCCCATAGGCATGCCTTTTTGCCCTGTATCTAGGTCTGGACAAGGGTAAGTGGTTGAACACA	-	chr1_19337580_19337828_EGR1_C2H2_1_center60	EGR1	ACCTCCGC	60	CREB1	TGACGTCA	478	562	493	981	864	619	2.6958	3.42941	-0.733604	1.66149	-1.76792	1.03432
chr1_19337580_19337828_EGR1_C2H2_1_center60_to_E2F1_HUMAN.H11MO.0.A	chr1_19337580_19337828	CAGAAAGTTCAGAGGAAATTTACCGCAAGGCAGAGCGTTTACCAGCCGATGACTTCGGCGGGAAGGCAGTGAAAGGCTTTGCAGAAAAGCACTGAAAAGAAAATACTTTCGCAATGAATGAGCTGGGCCCGCCTGGCTCGGGCTGACTCACCAAGAAGTCTTCACTTTATAAGGACTTTACTGGGGCTCCCATAGGCATGCCTTTTTGCCCTGTATCTAGGTCTGGACAAGGGTAAGTGGTTGAACACA	-	chr1_19337580_19337828_EGR1_C2H2_1_center60	EGR1	ACCTCCGC	60	E2F1	GGCGGGAA	471	443	424	321	290	321	1.4166	3.42941	-2.01281	1.66149	-1.76792	-0.244888
chr1_19337580_19337828_EGR1_C2H2_1_center60_to_ETS1_HUMAN.H11MO.0.A	chr1_19337580_19337828	CAGAAAGTTCAGAGGAAATTTACCGCAAGGCAGAGCGTTTACCAGCCGATGACTTACCGGAAGTGGCAGTGAAAGGCTTTGCAGAAAAGCACTGAAAAGAAAATACTTTCGCAATGAATGAGCTGGGCCCGCCTGGCTCGGGCTGACTCACCAAGAAGTCTTCACTTTATAAGGACTTTACTGGGGCTCCCATAGGCATGCCTTTTTGCCCTGTATCTAGGTCTGGACAAGGGTAAGTGGTTGAACACA	-	chr1_19337580_19337828_EGR1_C2H2_1_center60	EGR1	CACCTCCGC	60	ETS	ACCGGAAGT	216	242	233	828	695	609	3.60986	3.42941	0.180446	1.66149	-1.76792	1.94837
chr1_19337580_19337828_EGR1_C2H2_1_center60_to_FOSL1_MA0477.1	chr1_19337580_19337828	CAGAAAGTTCAGAGGAAATTTACCGCAAGGCAGAGCGTTTACCAGCCGATGACTTGTGACTCATGGCAGTGAAAGGCTTTGCAGAAAAGCACTGAAAAGAAAATACTTTCGCAATGAATGAGCTGGGCCCGCCTGGCTCGGGCTGACTCACCAAGAAGTCTTCACTTTATAAGGACTTTACTGGGGCTCCCATAGGCATGCCTTTTTGCCCTGTATCTAGGTCTGGACAAGGGTAAGTGGTTGAACACA	-	chr1_19337580_19337828_EGR1_C2H2_1_center60	EGR1	CACCTCCGC	60	AP-1	GTGACTCAT	195	258	272	657	577	516	3.25443	3.42941	-0.174983	1.66149	-1.76792	1.59294
chr1_19337580_19337828_EGR1_C2H2_1_center60_to_MAFK_MA0496.2	chr1_19337580_19337828	CAGAAAGTTCAGAGGAAATTTACCGCAAGGCAGAGCGTTTACCAGCCGATGACTGCTGAGTCAGCACAGTGAAAGGCTTTGCAGAAAAGCACTGAAAAGAAAATACTTTCGCAATGAATGAGCTGGGCCCGCCTGGCTCGGGCTGACTCACCAAGAAGTCTTCACTTTATAAGGACTTTACTGGGGCTCCCATAGGCATGCCTTTTTGCCCTGTATCTAGGTCTGGACAAGGGTAAGTGGTTGAACACA	-	chr1_19337580_19337828_EGR1_C2H2_1_center60	EGR1	TTCACCTCCGCGG	60	MAF	TGCTGAGTCAGCA	381	392	372	502	440	344	2.16331	3.42941	-1.2661	1.66149	-1.76792	0.501819
chr1_19337580_19337828_EGR1_C2H2_1_center60_to_MECP2_HUMAN.H11MO.0.C	chr1_19337580_19337828	CAGAAAGTTCAGAGGAAATTTACCGCAAGGCAGAGCGTTTACCAGCCGATGACTTCCCCGGAGCGGCAGTGAAAGGCTTTGCAGAAAAGCACTGAAAAGAAAATACTTTCGCAATGAATGAGCTGGGCCCGCCTGGCTCGGGCTGACTCACCAAGAAGTCTTCACTTTATAAGGACTTTACTGGGGCTCCCATAGGCATGCCTTTTTGCCCTGTATCTAGGTCTGGACAAGGGTAAGTGGTTGAACACA	-	chr1_19337580_19337828_EGR1_C2H2_1_center60	EGR1	ACCTCCG	60	MECP2	CCCGGAG	325	287	341	353	287	302	1.93625	3.42941	-1.49316	1.66149	-1.76792	0.274757
chr1_19337580_19337828_EGR1_C2H2_1_center60_to_TP53_MA0106.3	chr1_19337580_19337828	CAGAAAGTTCAGAGGAAATTTACCGCAAGGCAGAGCGTTTACCAGCCGATGAACATGCCCGGGCATGTGTGAAAGGCTTTGCAGAAAAGCACTGAAAAGAAAATACTTTCGCAATGAATGAGCTGGGCCCGCCTGGCTCGGGCTGACTCACCAAGAAGTCTTCACTTTATAAGGACTTTACTGGGGCTCCCATAGGCATGCCTTTTTGCCCTGTATCTAGGTCTGGACAAGGGTAAGTGGTTGAACACA	-	chr1_19337580_19337828_EGR1_C2H2_1_center60	EGR1	CTTCACCTCCGCGGCA	60	P53	ACATGCCCGGGCATGT	329	335	344	2556	2069	3216	4.85148	3.42941	1.42207	1.66149	-1.76792	3.18999
chr1_19337580_19337828_MAFK_MA0496.2_center147_to_CREB1_MA0018.3	chr1_19337580_19337828	CAGAAAGTTCAGAGGAAATTTACCGCAAGGCAGAGCGTTTACCAGCCGATGACTTCACCTCCGCGGCAGTGAAAGGCTTTGCAGAAAAGCACTGAAAAGAAAATACTTTCGCAATGAATGAGCTGGGCCCGCCTGGCTCGGGCTGACGTCACAAGAAGTCTTCACTTTATAAGGACTTTACTGGGGCTCCCATAGGCATGCCTTTTTGCCCTGTATCTAGGTCTGGACAAGGGTAAGTGGTTGAACACA	-	chr1_19337580_19337828_MAFK_MA0496.2_center147	MAF	TGACTCAC	147	CREB1	TGACGTCA	191	208	211	309	291	226	2.43112	3.42941	-0.998289	1.02214	-2.40727	1.40898
chr1_19337580_19337828_MAFK_MA0496.2_center147_to_E2F1_HUMAN.H11MO.0.A	chr1_19337580_19337828	CAGAAAGTTCAGAGGAAATTTACCGCAAGGCAGAGCGTTTACCAGCCGATGACTTCACCTCCGCGGCAGTGAAAGGCTTTGCAGAAAAGCACTGAAAAGAAAATACTTTCGCAATGAATGAGCTGGGCCCGCCTGGCTCGGGCGGCGGGAACAAGAAGTCTTCACTTTATAAGGACTTTACTGGGGCTCCCATAGGCATGCCTTTTTGCCCTGTATCTAGGTCTGGACAAGGGTAAGTGGTTGAACACA	-	chr1_19337580_19337828_MAFK_MA0496.2_center147	MAF	TGACTCAC	147	E2F1	GGCGGGAA	170	209	190	111	139	174	1.47688	3.42941	-1.95253	1.02214	-2.40727	0.454739
chr1_19337580_19337828_MAFK_MA0496.2_center147_to_EGR1_C2H2_1	chr1_19337580_19337828	CAGAAAGTTCAGAGGAAATTTACCGCAAGGCAGAGCGTTTACCAGCCGATGACTTCACCTCCGCGGCAGTGAAAGGCTTTGCAGAAAAGCACTGAAAAGAAAATACTTTCGCAATGAATGAGCTGGGCCCGCCTGGCTCGGACGCCCACGCAAAGAAGTCTTCACTTTATAAGGACTTTACTGGGGCTCCCATAGGCATGCCTTTTTGCCCTGTATCTAGGTCTGGACAAGGGTAAGTGGTTGAACACA	-	chr1_19337580_19337828_MAFK_MA0496.2_center147	MAF	GCTGACTCACC	147	EGR1	ACGCCCACGCA	193	220	229	425	351	333	2.76088	3.42941	-0.668528	1.02214	-2.40727	1.73874
chr1_19337580_19337828_MAFK_MA0496.2_center147_to_ETS1_HUMAN.H11MO.0.A	chr1_19337580_19337828	CAGAAAGTTCAGAGGAAATTTACCGCAAGGCAGAGCGTTTACCAGCCGATGACTTCACCTCCGCGGCAGTGAAAGGCTTTGCAGAAAAGCACTGAAAAGAAAATACTTTCGCAATGAATGAGCTGGGCCCGCCTGGCTCGGGACCGGAAGTCAAGAAGTCTTCACTTTATAAGGACTTTACTGGGGCTCCCATAGGCATGCCTTTTTGCCCTGTATCTAGGTCTGGACAAGGGTAAGTGGTTGAACACA	-	chr1_19337580_19337828_MAFK_MA0496.2_center147	MAF	CTGACTCAC	147	ETS	ACCGGAAGT	104	99	101	162	148	120	2.48068	3.42941	-0.948734	1.02214	-2.40727	1.45854
chr1_19337580_19337828_MAFK_MA0496.2_center147_to_MECP2_HUMAN.H11MO.0.C	chr1_19337580_19337828	CAGAAAGTTCAGAGGAAATTTACCGCAAGGCAGAGCGTTTACCAGCCGATGACTTCACCTCCGCGGCAGTGAAAGGCTTTGCAGAAAAGCACTGAAAAGAAAATACTTTCGCAATGAATGAGCTGGGCCCGCCTGGCTCGGGCCCCGGAGCCAAGAAGTCTTCACTTTATAAGGACTTTACTGGGGCTCCCATAGGCATGCCTTTTTGCCCTGTATCTAGGTCTGGACAAGGGTAAGTGGTTGAACACA	-	chr1_19337580_19337828_MAFK_MA0496.2_center147	MAF	TGACTCA	147	MECP2	CCCGGAG	435	431	459	243	233	326	1.17235	3.42941	-2.25706	1.02214	-2.40727	0.15021
chr1_19337580_19337828_MAFK_MA0496.2_center147_to_TP53_MA0106.3	chr1_19337580_19337828	CAGAAAGTTCAGAGGAAATTTACCGCAAGGCAGAGCGTTTACCAGCCGATGACTTCACCTCCGCGGCAGTGAAAGGCTTTGCAGAAAAGCACTGAAAAGAAAATACTTTCGCAATGAATGAGCTGGGCCCGCCTGGCTCACATGCCCGGGCATGTAAGTCTTCACTTTATAAGGACTTTACTGGGGCTCCCATAGGCATGCCTTTTTGCCCTGTATCTAGGTCTGGACAAGGGTAAGTGGTTGAACACA	-	chr1_19337580_19337828_MAFK_MA0496.2_center147	MAF	GGGCTGACTCACCAAG	147	P53	ACATGCCCGGGCATGT	234	210	247	1003	839	1307	4.07618	3.42941	0.646766	1.02214	-2.40727	3.05404
chr1_19408058_19408306_EGR1_C2H2_1_center85_to_CREB1_MA0018.3	chr1_19408058_19408306	CTAGACATGGGGCCAGGGAAGAAGGGAAGATGCCGCGAAGAAGGGCCTGGAAGGGGACGAAGGGCGTGGATTATCAGAGGATGACGTCATAGTCGGCAAGGATGGGTGGGGAGTGTTGAGTCATCCAAGCGTTCAGCAAATGTCACAAGACAACGACAAATTGAGCAAATTCTTCCTGCTCTTGCTGCCGGGTCCTGCTTCCACCCTGCTTTTATTTTATCATGCCGCTTTTCTTCTAGAACCCGAGCA	-	chr1_19408058_19408306_EGR1_C2H2_1_center85	EGR1	AGTGGGAG	85	CREB1	TGACGTCA	583	598	593	943	872	752	2.51509	1.95494	0.560151	-1.73133	-3.68627	4.24642
chr1_19408058_19408306_EGR1_C2H2_1_center85_to_ETS1_HUMAN.H11MO.0.A	chr1_19408058_19408306	CTAGACATGGGGCCAGGGAAGAAGGGAAGATGCCGCGAAGAAGGGCCTGGAAGGGGACGAAGGGCGTGGATTATCAGAGGACCGGAAGTTAGTCGGCAAGGATGGGTGGGGAGTGTTGAGTCATCCAAGCGTTCAGCAAATGTCACAAGACAACGACAAATTGAGCAAATTCTTCCTGCTCTTGCTGCCGGGTCCTGCTTCCACCCTGCTTTTATTTTATCATGCCGCTTTTCTTCTAGAACCCGAGCA	-	chr1_19408058_19408306_EGR1_C2H2_1_center85	EGR1	AAGTGGGAG	85	ETS	ACCGGAAGT	210	194	228	175	139	149	1.49788	1.95494	-0.457064	-1.73133	-3.68627	3.2292
chr1_19408058_19408306_EGR1_C2H2_1_center85_to_FOSL1_MA0477.1	chr1_19408058_19408306	CTAGACATGGGGCCAGGGAAGAAGGGAAGATGCCGCGAAGAAGGGCCTGGAAGGGGACGAAGGGCGTGGATTATCAGAGGGTGACTCATTAGTCGGCAAGGATGGGTGGGGAGTGTTGAGTCATCCAAGCGTTCAGCAAATGTCACAAGACAACGACAAATTGAGCAAATTCTTCCTGCTCTTGCTGCCGGGTCCTGCTTCCACCCTGCTTTTATTTTATCATGCCGCTTTTCTTCTAGAACCCGAGCA	-	chr1_19408058_19408306_EGR1_C2H2_1_center85	EGR1	AAGTGGGAG	85	AP-1	GTGACTCAT	562	579	613	912	799	761	2.46487	1.95494	0.509933	-1.73133	-3.68627	4.1962
chr1_19408058_19408306_EGR1_C2H2_1_center85_to_MAFK_MA0496.2	chr1_19408058_19408306	CTAGACATGGGGCCAGGGAAGAAGGGAAGATGCCGCGAAGAAGGGCCTGGAAGGGGACGAAGGGCGTGGATTATCAGATGCTGAGTCAGCAGTCGGCAAGGATGGGTGGGGAGTGTTGAGTCATCCAAGCGTTCAGCAAATGTCACAAGACAACGACAAATTGAGCAAATTCTTCCTGCTCTTGCTGCCGGGTCCTGCTTCCACCCTGCTTTTATTTTATCATGCCGCTTTTCTTCTAGAACCCGAGCA	-	chr1_19408058_19408306_EGR1_C2H2_1_center85	EGR1	GGAAGTGGGAGTA	85	MAF	TGCTGAGTCAGCA	365	401	380	584	486	514	2.4217	1.95494	0.466761	-1.73133	-3.68627	4.15303
chr1_19408058_19408306_EGR1_C2H2_1_center85_to_MECP2_HUMAN.H11MO.0.C	chr1_19408058_19408306	CTAGACATGGGGCCAGGGAAGAAGGGAAGATGCCGCGAAGAAGGGCCTGGAAGGGGACGAAGGGCGTGGATTATCAGAGGACCCGGAGGTAGTCGGCAAGGATGGGTGGGGAGTGTTGAGTCATCCAAGCGTTCAGCAAATGTCACAAGACAACGACAAATTGAGCAAATTCTTCCTGCTCTTGCTGCCGGGTCCTGCTTCCACCCTGCTTTTATTTTATCATGCCGCTTTTCTTCTAGAACCCGAGCA	-	chr1_19408058_19408306_EGR1_C2H2_1_center85	EGR1	AGTGGGA	85	MECP2	CCCGGAG	199	217	188	13	5	28	-1.91207	1.95494	-3.86701	-1.73133	-3.68627	-0.180745
chr1_19408058_19408306_EGR1_C2H2_1_center85_to_TP53_MA0106.3	chr1_19408058_19408306	CTAGACATGGGGCCAGGGAAGAAGGGAAGATGCCGCGAAGAAGGGCCTGGAAGGGGACGAAGGGCGTGGATTATCAGACATGCCCGGGCATGTCGGCAAGGATGGGTGGGGAGTGTTGAGTCATCCAAGCGTTCAGCAAATGTCACAAGACAACGACAAATTGAGCAAATTCTTCCTGCTCTTGCTGCCGGGTCCTGCTTCCACCCTGCTTTTATTTTATCATGCCGCTTTTCTTCTAGAACCCGAGCA	-	chr1_19408058_19408306_EGR1_C2H2_1_center85	EGR1	AGGAAGTGGGAGTAGT	85	P53	ACATGCCCGGGCATGT	217	216	236	1572	1219	1925	4.70942	1.95494	2.75448	-1.73133	-3.68627	6.44074
chr1_19408058_19408306_MAFK_MA0496.2_center120_to_CREB1_MA0018.3	chr1_19408058_19408306	CTAGACATGGGGCCAGGGAAGAAGGGAAGATGCCGCGAAGAAGGGCCTGGAAGGGGACGAAGGGCGTGGATTATCAGAGGAAGTGGGAGTAGTCGGCAAGGATGGGTGGGGAGTGTTGACGTCACCAAGCGTTCAGCAAATGTCACAAGACAACGACAAATTGAGCAAATTCTTCCTGCTCTTGCTGCCGGGTCCTGCTTCCACCCTGCTTTTATTTTATCATGCCGCTTTTCTTCTAGAACCCGAGCA	-	chr1_19408058_19408306_MAFK_MA0496.2_center120	MAF	TGAGTCAT	120	CREB1	TGACGTCA	210	211	222	123	99	158	1.12256	1.95494	-0.832381	0.52702	-1.42792	0.595539
chr1_19408058_19408306_MAFK_MA0496.2_center120_to_E2F1_HUMAN.H11MO.0.A	chr1_19408058_19408306	CTAGACATGGGGCCAGGGAAGAAGGGAAGATGCCGCGAAGAAGGGCCTGGAAGGGGACGAAGGGCGTGGATTATCAGAGGAAGTGGGAGTAGTCGGCAAGGATGGGTGGGGAGTGTGGCGGGAACCAAGCGTTCAGCAAATGTCACAAGACAACGACAAATTGAGCAAATTCTTCCTGCTCTTGCTGCCGGGTCCTGCTTCCACCCTGCTTTTATTTTATCATGCCGCTTTTCTTCTAGAACCCGAGCA	-	chr1_19408058_19408306_MAFK_MA0496.2_center120	MAF	TGAGTCAT	120	E2F1	GGCGGGAA	155	177	160	44	36	113	0.430989	1.95494	-1.52395	0.52702	-1.42792	-0.0960312
chr1_19408058_19408306_MAFK_MA0496.2_center120_to_EGR1_C2H2_1	chr1_19408058_19408306	CTAGACATGGGGCCAGGGAAGAAGGGAAGATGCCGCGAAGAAGGGCCTGGAAGGGGACGAAGGGCGTGGATTATCAGAGGAAGTGGGAGTAGTCGGCAAGGATGGGTGGGGAGTACGCCCACGCACAAGCGTTCAGCAAATGTCACAAGACAACGACAAATTGAGCAAATTCTTCCTGCTCTTGCTGCCGGGTCCTGCTTCCACCCTGCTTTTATTTTATCATGCCGCTTTTCTTCTAGAACCCGAGCA	-	chr1_19408058_19408306_MAFK_MA0496.2_center120	MAF	GTTGAGTCATC	120	EGR1	ACGCCCACGCA	88	77	95	45	43	81	1.22343	1.95494	-0.731507	0.52702	-1.42792	0.696412
chr1_19408058_19408306_MAFK_MA0496.2_center120_to_ETS1_HUMAN.H11MO.0.A	chr1_19408058_19408306	CTAGACATGGGGCCAGGGAAGAAGGGAAGATGCCGCGAAGAAGGGCCTGGAAGGGGACGAAGGGCGTGGATTATCAGAGGAAGTGGGAGTAGTCGGCAAGGATGGGTGGGGAGTGACCGGAAGTCCAAGCGTTCAGCAAATGTCACAAGACAACGACAAATTGAGCAAATTCTTCCTGCTCTTGCTGCCGGGTCCTGCTTCCACCCTGCTTTTATTTTATCATGCCGCTTTTCTTCTAGAACCCGAGCA	-	chr1_19408058_19408306_MAFK_MA0496.2_center120	MAF	TTGAGTCAT	120	ETS	ACCGGAAGT	594	555	580	343	300	506	1.27926	1.95494	-0.675678	0.52702	-1.42792	0.752241
chr1_19408058_19408306_MAFK_MA0496.2_center120_to_MECP2_HUMAN.H11MO.0.C	chr1_19408058_19408306	CTAGACATGGGGCCAGGGAAGAAGGGAAGATGCCGCGAAGAAGGGCCTGGAAGGGGACGAAGGGCGTGGATTATCAGAGGAAGTGGGAGTAGTCGGCAAGGATGGGTGGGGAGTGTCCCGGAGTCCAAGCGTTCAGCAAATGTCACAAGACAACGACAAATTGAGCAAATTCTTCCTGCTCTTGCTGCCGGGTCCTGCTTCCACCCTGCTTTTATTTTATCATGCCGCTTTTCTTCTAGAACCCGAGCA	-	chr1_19408058_19408306_MAFK_MA0496.2_center120	MAF	TGAGTCA	120	MECP2	CCCGGAG	393	397	434	144	126	263	0.633796	1.95494	-1.32114	0.52702	-1.42792	0.106776
chr1_19408058_19408306_MAFK_MA0496.2_center120_to_TP53_MA0106.3	chr1_19408058_19408306	CTAGACATGGGGCCAGGGAAGAAGGGAAGATGCCGCGAAGAAGGGCCTGGAAGGGGACGAAGGGCGTGGATTATCAGAGGAAGTGGGAGTAGTCGGCAAGGATGGGTGGGGAACATGCCCGGGCATGTGCGTTCAGCAAATGTCACAAGACAACGACAAATTGAGCAAATTCTTCCTGCTCTTGCTGCCGGGTCCTGCTTCCACCCTGCTTTTATTTTATCATGCCGCTTTTCTTCTAGAACCCGAGCA	-	chr1_19408058_19408306_MAFK_MA0496.2_center120	MAF	GTGTTGAGTCATCCAA	120	P53	ACATGCCCGGGCATGT	486	462	448	1547	1318	2093	3.71093	1.95494	1.75599	0.52702	-1.42792	3.18391
chr1_199241802_199242050_ETS1_HUMAN.H11MO.0.A_center123_to_CREB1_MA0018.3	chr1_199241802_199242050	TAAATACACAGTAACCTCAGAGGGAGGCCTGGCATGTCCGGTTTAGGCAGTAGCCAGCTGGGCTGAGGGCTGCTGGCTTTGGGTCAAGAGCAAGCGCCCCCATGCCGGTCATTAGTTGCTGACGTCAGCTTTCCTTATTAGTCATTATTGCCTGAGGATTTTCTAGTGATAGAGTGTTAATACTGTAAGAAATGCTATAATTGCATGACTAGATTAGAAGATATGTACTGTACTTCATTATTCTACTTT	-	chr1_199241802_199242050_ETS1_HUMAN.H11MO.0.A_center123	ETS	CAGGAAAT	123	CREB1	TGACGTCA	183	171	183	50	43	70	0.14804	2.01547	-1.86743	0.129779	-1.88569	0.0182606
chr1_199241802_199242050_ETS1_HUMAN.H11MO.0.A_center123_to_EGR1_C2H2_1	chr1_199241802_199242050	TAAATACACAGTAACCTCAGAGGGAGGCCTGGCATGTCCGGTTTAGGCAGTAGCCAGCTGGGCTGAGGGCTGCTGGCTTTGGGTCAAGAGCAAGCGCCCCCATGCCGGTCATTAGTTACGCCCACGCACTTTCCTTATTAGTCATTATTGCCTGAGGATTTTCTAGTGATAGAGTGTTAATACTGTAAGAAATGCTATAATTGCATGACTAGATTAGAAGATATGTACTGTACTTCATTATTCTACTTT	-	chr1_199241802_199242050_ETS1_HUMAN.H11MO.0.A_center123	ETS	GCCAGGAAATG	123	EGR1	ACGCCCACGCA	141	155	148	43	43	66	0.322978	2.01547	-1.6925	0.129779	-1.88569	0.193199
chr1_199241802_199242050_ETS1_HUMAN.H11MO.0.A_center123_to_FOSL1_MA0477.1	chr1_199241802_199242050	TAAATACACAGTAACCTCAGAGGGAGGCCTGGCATGTCCGGTTTAGGCAGTAGCCAGCTGGGCTGAGGGCTGCTGGCTTTGGGTCAAGAGCAAGCGCCCCCATGCCGGTCATTAGTTGGTGACTCATGCTTTCCTTATTAGTCATTATTGCCTGAGGATTTTCTAGTGATAGAGTGTTAATACTGTAAGAAATGCTATAATTGCATGACTAGATTAGAAGATATGTACTGTACTTCATTATTCTACTTT	-	chr1_199241802_199242050_ETS1_HUMAN.H11MO.0.A_center123	ETS	CCAGGAAAT	123	AP-1	GTGACTCAT	253	242	269	229	237	271	1.87489	2.01547	-0.140579	0.129779	-1.88569	1.74511
chr1_199241802_199242050_ETS1_HUMAN.H11MO.0.A_center123_to_MAFK_MA0496.2	chr1_199241802_199242050	TAAATACACAGTAACCTCAGAGGGAGGCCTGGCATGTCCGGTTTAGGCAGTAGCCAGCTGGGCTGAGGGCTGCTGGCTTTGGGTCAAGAGCAAGCGCCCCCATGCCGGTCATTAGTTGCTGAGTCAGCATTTCCTTATTAGTCATTATTGCCTGAGGATTTTCTAGTGATAGAGTGTTAATACTGTAAGAAATGCTATAATTGCATGACTAGATTAGAAGATATGTACTGTACTTCATTATTCTACTTT	-	chr1_199241802_199242050_ETS1_HUMAN.H11MO.0.A_center123	ETS	TGCCAGGAAATGC	123	MAF	TGCTGAGTCAGCA	262	273	280	75	68	133	0.280626	2.01547	-1.73485	0.129779	-1.88569	0.150847
chr1_199241802_199242050_ETS1_HUMAN.H11MO.0.A_center123_to_MECP2_HUMAN.H11MO.0.C	chr1_199241802_199242050	TAAATACACAGTAACCTCAGAGGGAGGCCTGGCATGTCCGGTTTAGGCAGTAGCCAGCTGGGCTGAGGGCTGCTGGCTTTGGGTCAAGAGCAAGCGCCCCCATGCCGGTCATTAGTTGCCCCGGAGTGCTTTCCTTATTAGTCATTATTGCCTGAGGATTTTCTAGTGATAGAGTGTTAATACTGTAAGAAATGCTATAATTGCATGACTAGATTAGAAGATATGTACTGTACTTCATTATTCTACTTT	-	chr1_199241802_199242050_ETS1_HUMAN.H11MO.0.A_center123	ETS	CAGGAAA	123	MECP2	CCCGGAG	274	322	303	105	92	155	0.516428	2.01547	-1.49905	0.129779	-1.88569	0.386649
chr1_199241802_199242050_ETS1_HUMAN.H11MO.0.A_center123_to_TP53_MA0106.3	chr1_199241802_199242050	TAAATACACAGTAACCTCAGAGGGAGGCCTGGCATGTCCGGTTTAGGCAGTAGCCAGCTGGGCTGAGGGCTGCTGGCTTTGGGTCAAGAGCAAGCGCCCCCATGCCGGTCATTAGACATGCCCGGGCATGTTCCTTATTAGTCATTATTGCCTGAGGATTTTCTAGTGATAGAGTGTTAATACTGTAAGAAATGCTATAATTGCATGACTAGATTAGAAGATATGTACTGTACTTCATTATTCTACTTT	-	chr1_199241802_199242050_ETS1_HUMAN.H11MO.0.A_center123	ETS	TTGCCAGGAAATGCTT	123	P53	ACATGCCCGGGCATGT	200	183	208	605	503	812	3.58133	2.01547	1.56586	0.129779	-1.88569	3.45155
chr1_199241802_199242050_FOSL1_MA0477.1_center141_to_CREB1_MA0018.3	chr1_199241802_199242050	TAAATACACAGTAACCTCAGAGGGAGGCCTGGCATGTCCGGTTTAGGCAGTAGCCAGCTGGGCTGAGGGCTGCTGGCTTTGGGTCAAGAGCAAGCGCCCCCATGCCGGTCATTAGTTGCCAGGAAATGCTTTCCTTATGACGTCATATTGCCTGAGGATTTTCTAGTGATAGAGTGTTAATACTGTAAGAAATGCTATAATTGCATGACTAGATTAGAAGATATGTACTGTACTTCATTATTCTACTTT	-	chr1_199241802_199242050_FOSL1_MA0477.1_center141	AP-1	TTAGTCAT	141	CREB1	TGACGTCA	168	190	183	161	146	143	1.6896	2.01547	-0.325874	0.186008	-1.82946	1.50359
chr1_199241802_199242050_FOSL1_MA0477.1_center141_to_E2F1_HUMAN.H11MO.0.A	chr1_199241802_199242050	TAAATACACAGTAACCTCAGAGGGAGGCCTGGCATGTCCGGTTTAGGCAGTAGCCAGCTGGGCTGAGGGCTGCTGGCTTTGGGTCAAGAGCAAGCGCCCCCATGCCGGTCATTAGTTGCCAGGAAATGCTTTCCTTAGGCGGGAATATTGCCTGAGGATTTTCTAGTGATAGAGTGTTAATACTGTAAGAAATGCTATAATTGCATGACTAGATTAGAAGATATGTACTGTACTTCATTATTCTACTTT	-	chr1_199241802_199242050_FOSL1_MA0477.1_center141	AP-1	TTAGTCAT	141	E2F1	GGCGGGAA	318	307	328	75	64	94	-0.145812	2.01547	-2.16128	0.186008	-1.82946	-0.331819
chr1_199241802_199242050_FOSL1_MA0477.1_center141_to_EGR1_C2H2_1	chr1_199241802_199242050	TAAATACACAGTAACCTCAGAGGGAGGCCTGGCATGTCCGGTTTAGGCAGTAGCCAGCTGGGCTGAGGGCTGCTGGCTTTGGGTCAAGAGCAAGCGCCCCCATGCCGGTCATTAGTTGCCAGGAAATGCTTTCCTACGCCCACGCAATTGCCTGAGGATTTTCTAGTGATAGAGTGTTAATACTGTAAGAAATGCTATAATTGCATGACTAGATTAGAAGATATGTACTGTACTTCATTATTCTACTTT	-	chr1_199241802_199242050_FOSL1_MA0477.1_center141	AP-1	TATTAGTCATT	141	EGR1	ACGCCCACGCA	110	93	93	38	32	55	0.615195	2.01547	-1.40028	0.186008	-1.82946	0.429187
chr1_199241802_199242050_FOSL1_MA0477.1_center141_to_ETS1_HUMAN.H11MO.0.A	chr1_199241802_199242050	TAAATACACAGTAACCTCAGAGGGAGGCCTGGCATGTCCGGTTTAGGCAGTAGCCAGCTGGGCTGAGGGCTGCTGGCTTTGGGTCAAGAGCAAGCGCCCCCATGCCGGTCATTAGTTGCCAGGAAATGCTTTCCTTACCGGAAGTTATTGCCTGAGGATTTTCTAGTGATAGAGTGTTAATACTGTAAGAAATGCTATAATTGCATGACTAGATTAGAAGATATGTACTGTACTTCATTATTCTACTTT	-	chr1_199241802_199242050_FOSL1_MA0477.1_center141	AP-1	ATTAGTCAT	141	ETS	ACCGGAAGT	526	569	544	179	142	262	0.369196	2.01547	-1.64628	0.186008	-1.82946	0.183188
chr1_199241802_199242050_FOSL1_MA0477.1_center141_to_MECP2_HUMAN.H11MO.0.C	chr1_199241802_199242050	TAAATACACAGTAACCTCAGAGGGAGGCCTGGCATGTCCGGTTTAGGCAGTAGCCAGCTGGGCTGAGGGCTGCTGGCTTTGGGTCAAGAGCAAGCGCCCCCATGCCGGTCATTAGTTGCCAGGAAATGCTTTCCTTACCCGGAGTTATTGCCTGAGGATTTTCTAGTGATAGAGTGTTAATACTGTAAGAAATGCTATAATTGCATGACTAGATTAGAAGATATGTACTGTACTTCATTATTCTACTTT	-	chr1_199241802_199242050_FOSL1_MA0477.1_center141	AP-1	TTAGTCA	141	MECP2	CCCGGAG	230	247	239	61	48	75	-0.079693	2.01547	-2.09517	0.186008	-1.82946	-0.265701
chr1_199241802_199242050_FOSL1_MA0477.1_center141_to_TP53_MA0106.3	chr1_199241802_199242050	TAAATACACAGTAACCTCAGAGGGAGGCCTGGCATGTCCGGTTTAGGCAGTAGCCAGCTGGGCTGAGGGCTGCTGGCTTTGGGTCAAGAGCAAGCGCCCCCATGCCGGTCATTAGTTGCCAGGAAATGCTTTCACATGCCCGGGCATGTGCCTGAGGATTTTCTAGTGATAGAGTGTTAATACTGTAAGAAATGCTATAATTGCATGACTAGATTAGAAGATATGTACTGTACTTCATTATTCTACTTT	-	chr1_199241802_199242050_FOSL1_MA0477.1_center141	AP-1	CTTATTAGTCATTATT	141	P53	ACATGCCCGGGCATGT	263	282	310	335	287	478	2.23903	2.01547	0.223562	0.186008	-1.82946	2.05303
chr1_200609148_200609396_MAFK_MA0496.2_center98_to_CREB1_MA0018.3	chr1_200609148_200609396	GGGGAAAGGGCTAATATTTTGAAGTGATGAAGTCTTGGGCTTCAGTACCAGCATGAAAATGTGGACATTTTGAAAAAATACAGATAGGACTTCGTGACGTCACAGATATGGAGATTAGGAAGAGAAATGAGTCAGTGATGACAGCAGGGCTTTGACTGAGCAGGACTGGGGGCGTGGTAGCACCATAGGCAATAGGGAAGTCAGAAAGGAGGAACTAGGCTTTCTGTAGGGAAGATGATAAATTTGGCT	+	chr1_200609148_200609396_MAFK_MA0496.2_center98	MAF	TGACTAAG	98	CREB1	TGACGTCA	297	300	289	190	183	203	1.31169	3.52125	-2.20956	0.618302	-2.90295	0.693389
chr1_200609148_200609396_MAFK_MA0496.2_center98_to_E2F1_HUMAN.H11MO.0.A	chr1_200609148_200609396	GGGGAAAGGGCTAATATTTTGAAGTGATGAAGTCTTGGGCTTCAGTACCAGCATGAAAATGTGGACATTTTGAAAAAATACAGATAGGACTTCGGGCGGGAACAGATATGGAGATTAGGAAGAGAAATGAGTCAGTGATGACAGCAGGGCTTTGACTGAGCAGGACTGGGGGCGTGGTAGCACCATAGGCAATAGGGAAGTCAGAAAGGAGGAACTAGGCTTTCTGTAGGGAAGATGATAAATTTGGCT	+	chr1_200609148_200609396_MAFK_MA0496.2_center98	MAF	TGACTAAG	98	E2F1	GGCGGGAA	68	65	72	23	30	70	1.06929	3.52125	-2.45196	0.618302	-2.90295	0.450988
chr1_200609148_200609396_MAFK_MA0496.2_center98_to_EGR1_C2H2_1	chr1_200609148_200609396	GGGGAAAGGGCTAATATTTTGAAGTGATGAAGTCTTGGGCTTCAGTACCAGCATGAAAATGTGGACATTTTGAAAAAATACAGATAGGACTTACGCCCACGCAAGATATGGAGATTAGGAAGAGAAATGAGTCAGTGATGACAGCAGGGCTTTGACTGAGCAGGACTGGGGGCGTGGTAGCACCATAGGCAATAGGGAAGTCAGAAAGGAGGAACTAGGCTTTCTGTAGGGAAGATGATAAATTTGGCT	+	chr1_200609148_200609396_MAFK_MA0496.2_center98	MAF	CGTGACTAAGC	98	EGR1	ACGCCCACGCA	160	210	208	118	116	175	1.38461	3.52125	-2.13664	0.618302	-2.90295	0.76631
chr1_200609148_200609396_MAFK_MA0496.2_center98_to_ETS1_HUMAN.H11MO.0.A	chr1_200609148_200609396	GGGGAAAGGGCTAATATTTTGAAGTGATGAAGTCTTGGGCTTCAGTACCAGCATGAAAATGTGGACATTTTGAAAAAATACAGATAGGACTTCACCGGAAGTCAGATATGGAGATTAGGAAGAGAAATGAGTCAGTGATGACAGCAGGGCTTTGACTGAGCAGGACTGGGGGCGTGGTAGCACCATAGGCAATAGGGAAGTCAGAAAGGAGGAACTAGGCTTTCTGTAGGGAAGATGATAAATTTGGCT	+	chr1_200609148_200609396_MAFK_MA0496.2_center98	MAF	GTGACTAAG	98	ETS	ACCGGAAGT	118	98	113	142	131	147	2.28135	3.52125	-1.2399	0.618302	-2.90295	1.66305
chr1_200609148_200609396_MAFK_MA0496.2_center98_to_MECP2_HUMAN.H11MO.0.C	chr1_200609148_200609396	GGGGAAAGGGCTAATATTTTGAAGTGATGAAGTCTTGGGCTTCAGTACCAGCATGAAAATGTGGACATTTTGAAAAAATACAGATAGGACTTCGCCCGGAGGCAGATATGGAGATTAGGAAGAGAAATGAGTCAGTGATGACAGCAGGGCTTTGACTGAGCAGGACTGGGGGCGTGGTAGCACCATAGGCAATAGGGAAGTCAGAAAGGAGGAACTAGGCTTTCTGTAGGGAAGATGATAAATTTGGCT	+	chr1_200609148_200609396_MAFK_MA0496.2_center98	MAF	TGACTAA	98	MECP2	CCCGGAG	90	101	122	40	55	78	1.01586	3.52125	-2.50539	0.618302	-2.90295	0.397554
chr1_200609148_200609396_MAFK_MA0496.2_center98_to_TP53_MA0106.3	chr1_200609148_200609396	GGGGAAAGGGCTAATATTTTGAAGTGATGAAGTCTTGGGCTTCAGTACCAGCATGAAAATGTGGACATTTTGAAAAAATACAGATAGGACACATGCCCGGGCATGTTATGGAGATTAGGAAGAGAAATGAGTCAGTGATGACAGCAGGGCTTTGACTGAGCAGGACTGGGGGCGTGGTAGCACCATAGGCAATAGGGAAGTCAGAAAGGAGGAACTAGGCTTTCTGTAGGGAAGATGATAAATTTGGCT	+	chr1_200609148_200609396_MAFK_MA0496.2_center98	MAF	TTCGTGACTAAGCAGA	98	P53	ACATGCCCGGGCATGT	94	127	111	658	534	885	4.52764	3.52125	1.00639	0.618302	-2.90295	3.90934
chr1_202558406_202558654_CREB1_MA0018.3_center121_to_E2F1_HUMAN.H11MO.0.A	chr1_202558406_202558654	CTTTGCATCGGTCATGCTTCTTTGCCTCTGTTTTGTGCCCCAGGACAGGACTGAATTCTTCAACCATGACATCAAGTGTGCTTGTTCTGCTGCTGCTTGGGTTACAAACAGCTGGGTGGCGGGAAGGGAGAAGAATCTTCCCTCCCTGACCTCTCCCCAAGTCAGTGACCAGGGATTTCCGCTTGGCAGGAAACACAGGGCTGAGCAAAGCCAGAGGCAGGGCTTGCTGGATGGAGAAACCAGACCCAG	-	chr1_202558406_202558654_CREB1_MA0018.3_center121	CREB1	GACATCAG	121	E2F1	GGCGGGAA	204	212	246	83	65	175	0.766337	3.69787	-2.93154	0.788477	-2.9094	-0.0221405
chr1_202558406_202558654_CREB1_MA0018.3_center121_to_EGR1_C2H2_1	chr1_202558406_202558654	CTTTGCATCGGTCATGCTTCTTTGCCTCTGTTTTGTGCCCCAGGACAGGACTGAATTCTTCAACCATGACATCAAGTGTGCTTGTTCTGCTGCTGCTTGGGTTACAAACAGCTGGACGCCCACGCAGGAGAAGAATCTTCCCTCCCTGACCTCTCCCCAAGTCAGTGACCAGGGATTTCCGCTTGGCAGGAAACACAGGGCTGAGCAAAGCCAGAGGCAGGGCTTGCTGGATGGAGAAACCAGACCCAG	-	chr1_202558406_202558654_CREB1_MA0018.3_center121	CREB1	GTGACATCAGG	121	EGR1	ACGCCCACGCA	284	317	276	325	315	423	2.1821	3.69787	-1.51578	0.788477	-2.9094	1.39362
chr1_202558406_202558654_CREB1_MA0018.3_center121_to_ETS1_HUMAN.H11MO.0.A	chr1_202558406_202558654	CTTTGCATCGGTCATGCTTCTTTGCCTCTGTTTTGTGCCCCAGGACAGGACTGAATTCTTCAACCATGACATCAAGTGTGCTTGTTCTGCTGCTGCTTGGGTTACAAACAGCTGGGACCGGAAGTGGGAGAAGAATCTTCCCTCCCTGACCTCTCCCCAAGTCAGTGACCAGGGATTTCCGCTTGGCAGGAAACACAGGGCTGAGCAAAGCCAGAGGCAGGGCTTGCTGGATGGAGAAACCAGACCCAG	-	chr1_202558406_202558654_CREB1_MA0018.3_center121	CREB1	TGACATCAG	121	ETS	ACCGGAAGT	218	213	233	180	158	258	1.71834	3.69787	-1.97954	0.788477	-2.9094	0.929862
chr1_202558406_202558654_CREB1_MA0018.3_center121_to_FOSL1_MA0477.1	chr1_202558406_202558654	CTTTGCATCGGTCATGCTTCTTTGCCTCTGTTTTGTGCCCCAGGACAGGACTGAATTCTTCAACCATGACATCAAGTGTGCTTGTTCTGCTGCTGCTTGGGTTACAAACAGCTGGGGTGACTCATGGGAGAAGAATCTTCCCTCCCTGACCTCTCCCCAAGTCAGTGACCAGGGATTTCCGCTTGGCAGGAAACACAGGGCTGAGCAAAGCCAGAGGCAGGGCTTGCTGGATGGAGAAACCAGACCCAG	-	chr1_202558406_202558654_CREB1_MA0018.3_center121	CREB1	TGACATCAG	121	AP-1	GTGACTCAT	233	219	209	1171	1046	1004	4.25022	3.69787	0.552344	0.788477	-2.9094	3.46174
chr1_202558406_202558654_CREB1_MA0018.3_center121_to_MAFK_MA0496.2	chr1_202558406_202558654	CTTTGCATCGGTCATGCTTCTTTGCCTCTGTTTTGTGCCCCAGGACAGGACTGAATTCTTCAACCATGACATCAAGTGTGCTTGTTCTGCTGCTGCTTGGGTTACAAACAGCTGTGCTGAGTCAGCAGAGAAGAATCTTCCCTCCCTGACCTCTCCCCAAGTCAGTGACCAGGGATTTCCGCTTGGCAGGAAACACAGGGCTGAGCAAAGCCAGAGGCAGGGCTTGCTGGATGGAGAAACCAGACCCAG	-	chr1_202558406_202558654_CREB1_MA0018.3_center121	CREB1	GGTGACATCAGGG	121	MAF	TGCTGAGTCAGCA	144	138	148	516	468	443	3.69727	3.69787	-0.000607322	0.788477	-2.9094	2.90879
chr1_202558406_202558654_CREB1_MA0018.3_center121_to_MECP2_HUMAN.H11MO.0.C	chr1_202558406_202558654	CTTTGCATCGGTCATGCTTCTTTGCCTCTGTTTTGTGCCCCAGGACAGGACTGAATTCTTCAACCATGACATCAAGTGTGCTTGTTCTGCTGCTGCTTGGGTTACAAACAGCTGGGTCCCGGAGGGGGAGAAGAATCTTCCCTCCCTGACCTCTCCCCAAGTCAGTGACCAGGGATTTCCGCTTGGCAGGAAACACAGGGCTGAGCAAAGCCAGAGGCAGGGCTTGCTGGATGGAGAAACCAGACCCAG	-	chr1_202558406_202558654_CREB1_MA0018.3_center121	CREB1	GACATCA	121	MECP2	CCCGGAG	159	181	199	62	60	98	0.574546	3.69787	-3.12333	0.788477	-2.9094	-0.213931
chr1_202558406_202558654_CREB1_MA0018.3_center121_to_TP53_MA0106.3	chr1_202558406_202558654	CTTTGCATCGGTCATGCTTCTTTGCCTCTGTTTTGTGCCCCAGGACAGGACTGAATTCTTCAACCATGACATCAAGTGTGCTTGTTCTGCTGCTGCTTGGGTTACAAACAGCTACATGCCCGGGCATGTGAAGAATCTTCCCTCCCTGACCTCTCCCCAAGTCAGTGACCAGGGATTTCCGCTTGGCAGGAAACACAGGGCTGAGCAAAGCCAGAGGCAGGGCTTGCTGGATGGAGAAACCAGACCCAG	-	chr1_202558406_202558654_CREB1_MA0018.3_center121	CREB1	GGGTGACATCAGGGGA	121	P53	ACATGCCCGGGCATGT	357	387	337	1867	1480	2456	4.30512	3.69787	0.607242	0.788477	-2.9094	3.51664
chr1_202558406_202558654_CREB1_MA0018.3_center71_to_E2F1_HUMAN.H11MO.0.A	chr1_202558406_202558654	CTTTGCATCGGTCATGCTTCTTTGCCTCTGTTTTGTGCCCCAGGACAGGACTGAATTCTTCAACCATGGCGGGAAGTGTGCTTGTTCTGCTGCTGCTTGGGTTACAAACAGCTGGGTGACATCAGGGGAGAAGAATCTTCCCTCCCTGACCTCTCCCCAAGTCAGTGACCAGGGATTTCCGCTTGGCAGGAAACACAGGGCTGAGCAAAGCCAGAGGCAGGGCTTGCTGGATGGAGAAACCAGACCCAG	-	chr1_202558406_202558654_CREB1_MA0018.3_center71	CREB1	GACATCAA	71	E2F1	GGCGGGAA	306	306	273	528	440	767	2.83742	3.69787	-0.860457	2.33546	-1.36241	0.501956
chr1_202558406_202558654_CREB1_MA0018.3_center71_to_EGR1_C2H2_1	chr1_202558406_202558654	CTTTGCATCGGTCATGCTTCTTTGCCTCTGTTTTGTGCCCCAGGACAGGACTGAATTCTTCAACCACGCCCACGCATGTGCTTGTTCTGCTGCTGCTTGGGTTACAAACAGCTGGGTGACATCAGGGGAGAAGAATCTTCCCTCCCTGACCTCTCCCCAAGTCAGTGACCAGGGATTTCCGCTTGGCAGGAAACACAGGGCTGAGCAAAGCCAGAGGCAGGGCTTGCTGGATGGAGAAACCAGACCCAG	-	chr1_202558406_202558654_CREB1_MA0018.3_center71	CREB1	ATGACATCAAG	71	EGR1	ACGCCCACGCA	171	237	219	714	599	723	3.63653	3.69787	-0.0613436	2.33546	-1.36241	1.30107
chr1_202558406_202558654_CREB1_MA0018.3_center71_to_ETS1_HUMAN.H11MO.0.A	chr1_202558406_202558654	CTTTGCATCGGTCATGCTTCTTTGCCTCTGTTTTGTGCCCCAGGACAGGACTGAATTCTTCAACCAACCGGAAGTGTGTGCTTGTTCTGCTGCTGCTTGGGTTACAAACAGCTGGGTGACATCAGGGGAGAAGAATCTTCCCTCCCTGACCTCTCCCCAAGTCAGTGACCAGGGATTTCCGCTTGGCAGGAAACACAGGGCTGAGCAAAGCCAGAGGCAGGGCTTGCTGGATGGAGAAACCAGACCCAG	-	chr1_202558406_202558654_CREB1_MA0018.3_center71	CREB1	TGACATCAA	71	ETS	ACCGGAAGT	477	446	479	1343	1177	1225	3.37226	3.69787	-0.325614	2.33546	-1.36241	1.0368
chr1_202558406_202558654_CREB1_MA0018.3_center71_to_FOSL1_MA0477.1	chr1_202558406_202558654	CTTTGCATCGGTCATGCTTCTTTGCCTCTGTTTTGTGCCCCAGGACAGGACTGAATTCTTCAACCAGTGACTCATGTGTGCTTGTTCTGCTGCTGCTTGGGTTACAAACAGCTGGGTGACATCAGGGGAGAAGAATCTTCCCTCCCTGACCTCTCCCCAAGTCAGTGACCAGGGATTTCCGCTTGGCAGGAAACACAGGGCTGAGCAAAGCCAGAGGCAGGGCTTGCTGGATGGAGAAACCAGACCCAG	-	chr1_202558406_202558654_CREB1_MA0018.3_center71	CREB1	TGACATCAA	71	AP-1	GTGACTCAT	264	279	299	1916	1688	1957	4.66298	3.69787	0.965106	2.33546	-1.36241	2.32752
chr1_202558406_202558654_CREB1_MA0018.3_center71_to_MAFK_MA0496.2	chr1_202558406_202558654	CTTTGCATCGGTCATGCTTCTTTGCCTCTGTTTTGTGCCCCAGGACAGGACTGAATTCTTCAACTGCTGAGTCAGCAGTGCTTGTTCTGCTGCTGCTTGGGTTACAAACAGCTGGGTGACATCAGGGGAGAAGAATCTTCCCTCCCTGACCTCTCCCCAAGTCAGTGACCAGGGATTTCCGCTTGGCAGGAAACACAGGGCTGAGCAAAGCCAGAGGCAGGGCTTGCTGGATGGAGAAACCAGACCCAG	-	chr1_202558406_202558654_CREB1_MA0018.3_center71	CREB1	CATGACATCAAGT	71	MAF	TGCTGAGTCAGCA	172	171	172	606	518	622	3.69307	3.69787	-0.00479991	2.33546	-1.36241	1.35761
chr1_202558406_202558654_CREB1_MA0018.3_center71_to_MECP2_HUMAN.H11MO.0.C	chr1_202558406_202558654	CTTTGCATCGGTCATGCTTCTTTGCCTCTGTTTTGTGCCCCAGGACAGGACTGAATTCTTCAACCATCCCGGAGAGTGTGCTTGTTCTGCTGCTGCTTGGGTTACAAACAGCTGGGTGACATCAGGGGAGAAGAATCTTCCCTCCCTGACCTCTCCCCAAGTCAGTGACCAGGGATTTCCGCTTGGCAGGAAACACAGGGCTGAGCAAAGCCAGAGGCAGGGCTTGCTGGATGGAGAAACCAGACCCAG	-	chr1_202558406_202558654_CREB1_MA0018.3_center71	CREB1	GACATCA	71	MECP2	CCCGGAG	239	230	250	393	321	405	2.5628	3.69787	-1.13508	2.33546	-1.36241	0.227335
chr1_202558406_202558654_CREB1_MA0018.3_center71_to_TP53_MA0106.3	chr1_202558406_202558654	CTTTGCATCGGTCATGCTTCTTTGCCTCTGTTTTGTGCCCCAGGACAGGACTGAATTCTTCAAACATGCCCGGGCATGTGCTTGTTCTGCTGCTGCTTGGGTTACAAACAGCTGGGTGACATCAGGGGAGAAGAATCTTCCCTCCCTGACCTCTCCCCAAGTCAGTGACCAGGGATTTCCGCTTGGCAGGAAACACAGGGCTGAGCAAAGCCAGAGGCAGGGCTTGCTGGATGGAGAAACCAGACCCAG	-	chr1_202558406_202558654_CREB1_MA0018.3_center71	CREB1	CCATGACATCAAGTGT	71	P53	ACATGCCCGGGCATGT	203	210	209	1615	1302	2200	4.91696	3.69787	1.21908	2.33546	-1.36241	2.58149
chr1_202558406_202558654_ETS1_HUMAN.H11MO.0.A_center178_to_CREB1_MA0018.3	chr1_202558406_202558654	CTTTGCATCGGTCATGCTTCTTTGCCTCTGTTTTGTGCCCCAGGACAGGACTGAATTCTTCAACCATGACATCAAGTGTGCTTGTTCTGCTGCTGCTTGGGTTACAAACAGCTGGGTGACATCAGGGGAGAAGAATCTTCCCTCCCTGACCTCTCCCCAAGTCAGTGACCAGGGTGACGTCATTGGCAGGAAACACAGGGCTGAGCAAAGCCAGAGGCAGGGCTTGCTGGATGGAGAAACCAGACCCAG	-	chr1_202558406_202558654_ETS1_HUMAN.H11MO.0.A_center178	ETS	ATTTCCGC	178	CREB1	TGACGTCA	146	162	150	693	572	603	3.98416	3.69787	0.286289	2.47787	-1.22001	1.5063
chr1_202558406_202558654_ETS1_HUMAN.H11MO.0.A_center178_to_E2F1_HUMAN.H11MO.0.A	chr1_202558406_202558654	CTTTGCATCGGTCATGCTTCTTTGCCTCTGTTTTGTGCCCCAGGACAGGACTGAATTCTTCAACCATGACATCAAGTGTGCTTGTTCTGCTGCTGCTTGGGTTACAAACAGCTGGGTGACATCAGGGGAGAAGAATCTTCCCTCCCTGACCTCTCCCCAAGTCAGTGACCAGGGGGCGGGAATTGGCAGGAAACACAGGGCTGAGCAAAGCCAGAGGCAGGGCTTGCTGGATGGAGAAACCAGACCCAG	-	chr1_202558406_202558654_ETS1_HUMAN.H11MO.0.A_center178	ETS	ATTTCCGC	178	E2F1	GGCGGGAA	263	244	270	325	321	375	2.32061	3.69787	-1.37726	2.47787	-1.22001	-0.157256
chr1_202558406_202558654_ETS1_HUMAN.H11MO.0.A_center178_to_EGR1_C2H2_1	chr1_202558406_202558654	CTTTGCATCGGTCATGCTTCTTTGCCTCTGTTTTGTGCCCCAGGACAGGACTGAATTCTTCAACCATGACATCAAGTGTGCTTGTTCTGCTGCTGCTTGGGTTACAAACAGCTGGGTGACATCAGGGGAGAAGAATCTTCCCTCCCTGACCTCTCCCCAAGTCAGTGACCAGACGCCCACGCATGGCAGGAAACACAGGGCTGAGCAAAGCCAGAGGCAGGGCTTGCTGGATGGAGAAACCAGACCCAG	-	chr1_202558406_202558654_ETS1_HUMAN.H11MO.0.A_center178	ETS	GGATTTCCGCT	178	EGR1	ACGCCCACGCA	74	101	105	315	235	272	3.50169	3.69787	-0.196188	2.47787	-1.22001	1.02382
chr1_202558406_202558654_ETS1_HUMAN.H11MO.0.A_center178_to_FOSL1_MA0477.1	chr1_202558406_202558654	CTTTGCATCGGTCATGCTTCTTTGCCTCTGTTTTGTGCCCCAGGACAGGACTGAATTCTTCAACCATGACATCAAGTGTGCTTGTTCTGCTGCTGCTTGGGTTACAAACAGCTGGGTGACATCAGGGGAGAAGAATCTTCCCTCCCTGACCTCTCCCCAAGTCAGTGACCAGGGTGACTCATTTGGCAGGAAACACAGGGCTGAGCAAAGCCAGAGGCAGGGCTTGCTGGATGGAGAAACCAGACCCAG	-	chr1_202558406_202558654_ETS1_HUMAN.H11MO.0.A_center178	ETS	GATTTCCGC	178	AP-1	GTGACTCAT	224	231	224	1006	890	880	3.99442	3.69787	0.296546	2.47787	-1.22001	1.51655
chr1_202558406_202558654_ETS1_HUMAN.H11MO.0.A_center178_to_MAFK_MA0496.2	chr1_202558406_202558654	CTTTGCATCGGTCATGCTTCTTTGCCTCTGTTTTGTGCCCCAGGACAGGACTGAATTCTTCAACCATGACATCAAGTGTGCTTGTTCTGCTGCTGCTTGGGTTACAAACAGCTGGGTGACATCAGGGGAGAAGAATCTTCCCTCCCTGACCTCTCCCCAAGTCAGTGACCATGCTGAGTCAGCAGGCAGGAAACACAGGGCTGAGCAAAGCCAGAGGCAGGGCTTGCTGGATGGAGAAACCAGACCCAG	-	chr1_202558406_202558654_ETS1_HUMAN.H11MO.0.A_center178	ETS	GGGATTTCCGCTT	178	MAF	TGCTGAGTCAGCA	112	151	126	251	228	200	2.78159	3.69787	-0.916288	2.47787	-1.22001	0.30372
chr1_202558406_202558654_ETS1_HUMAN.H11MO.0.A_center178_to_MECP2_HUMAN.H11MO.0.C	chr1_202558406_202558654	CTTTGCATCGGTCATGCTTCTTTGCCTCTGTTTTGTGCCCCAGGACAGGACTGAATTCTTCAACCATGACATCAAGTGTGCTTGTTCTGCTGCTGCTTGGGTTACAAACAGCTGGGTGACATCAGGGGAGAAGAATCTTCCCTCCCTGACCTCTCCCCAAGTCAGTGACCAGGGCCCGGAGCTTGGCAGGAAACACAGGGCTGAGCAAAGCCAGAGGCAGGGCTTGCTGGATGGAGAAACCAGACCCAG	-	chr1_202558406_202558654_ETS1_HUMAN.H11MO.0.A_center178	ETS	ATTTCCG	178	MECP2	CCCGGAG	301	316	325	490	435	542	2.56309	3.69787	-1.13478	2.47787	-1.22001	0.0852261
chr1_202558406_202558654_ETS1_HUMAN.H11MO.0.A_center178_to_TP53_MA0106.3	chr1_202558406_202558654	CTTTGCATCGGTCATGCTTCTTTGCCTCTGTTTTGTGCCCCAGGACAGGACTGAATTCTTCAACCATGACATCAAGTGTGCTTGTTCTGCTGCTGCTTGGGTTACAAACAGCTGGGTGACATCAGGGGAGAAGAATCTTCCCTCCCTGACCTCTCCCCAAGTCAGTGACCACATGCCCGGGCATGTCAGGAAACACAGGGCTGAGCAAAGCCAGAGGCAGGGCTTGCTGGATGGAGAAACCAGACCCAG	-	chr1_202558406_202558654_ETS1_HUMAN.H11MO.0.A_center178	ETS	AGGGATTTCCGCTTGG	178	P53	ACATGCCCGGGCATGT	161	181	171	975	781	1284	4.44986	3.69787	0.751981	2.47787	-1.22001	1.97199
chr1_207064068_207064316_CREB1_MA0018.3_center151_to_E2F1_HUMAN.H11MO.0.A	chr1_207064068_207064316	GAGGGGAGATTAACACTGTCCAGAAATCCGAAAATCTCTTTGTAGGTGTGGAGAGTGGACCTGGATAGGAGGAAAGGGAGGGTGCTATTTTAGGAGTACAGTAGTCTCCCTTTATCTGTGGTTTCACTTCCTGTGATTTCAGTTACTGGCGGGAACAGTGGTTTGAAAATATTTATTACATGGAAAATTCCGGAAATAAACAATTCATAAGTTTAAATCGCGTGCTACTCTGAGCAGCGTGATAAAGTC	+	chr1_207064068_207064316_CREB1_MA0018.3_center151	CREB1	GACGTCAA	151	E2F1	GGCGGGAA	187	199	170	64	54	112	0.563793	3.12366	-2.55986	0.472913	-2.65074	0.0908804
chr1_207064068_207064316_CREB1_MA0018.3_center151_to_EGR1_C2H2_1	chr1_207064068_207064316	GAGGGGAGATTAACACTGTCCAGAAATCCGAAAATCTCTTTGTAGGTGTGGAGAGTGGACCTGGATAGGAGGAAAGGGAGGGTGCTATTTTAGGAGTACAGTAGTCTCCCTTTATCTGTGGTTTCACTTCCTGTGATTTCAGTTAACGCCCACGCAAGTGGTTTGAAAATATTTATTACATGGAAAATTCCGGAAATAAACAATTCATAAGTTTAAATCGCGTGCTACTCTGAGCAGCGTGATAAAGTC	+	chr1_207064068_207064316_CREB1_MA0018.3_center151	CREB1	CTGACGTCAAC	151	EGR1	ACGCCCACGCA	188	209	234	295	225	229	2.21094	3.12366	-0.912717	0.472913	-2.65074	1.73803
chr1_207064068_207064316_CREB1_MA0018.3_center151_to_ETS1_HUMAN.H11MO.0.A	chr1_207064068_207064316	GAGGGGAGATTAACACTGTCCAGAAATCCGAAAATCTCTTTGTAGGTGTGGAGAGTGGACCTGGATAGGAGGAAAGGGAGGGTGCTATTTTAGGAGTACAGTAGTCTCCCTTTATCTGTGGTTTCACTTCCTGTGATTTCAGTTACACCGGAAGTCAGTGGTTTGAAAATATTTATTACATGGAAAATTCCGGAAATAAACAATTCATAAGTTTAAATCGCGTGCTACTCTGAGCAGCGTGATAAAGTC	+	chr1_207064068_207064316_CREB1_MA0018.3_center151	CREB1	TGACGTCAA	151	ETS	ACCGGAAGT	162	165	161	124	110	139	1.52448	3.12366	-1.59917	0.472913	-2.65074	1.05157
chr1_207064068_207064316_CREB1_MA0018.3_center151_to_FOSL1_MA0477.1	chr1_207064068_207064316	GAGGGGAGATTAACACTGTCCAGAAATCCGAAAATCTCTTTGTAGGTGTGGAGAGTGGACCTGGATAGGAGGAAAGGGAGGGTGCTATTTTAGGAGTACAGTAGTCTCCCTTTATCTGTGGTTTCACTTCCTGTGATTTCAGTTACGTGACTCATCAGTGGTTTGAAAATATTTATTACATGGAAAATTCCGGAAATAAACAATTCATAAGTTTAAATCGCGTGCTACTCTGAGCAGCGTGATAAAGTC	+	chr1_207064068_207064316_CREB1_MA0018.3_center151	CREB1	TGACGTCAA	151	AP-1	GTGACTCAT	305	313	289	944	853	746	3.46742	3.12366	0.343765	0.472913	-2.65074	2.99451
chr1_207064068_207064316_CREB1_MA0018.3_center151_to_MAFK_MA0496.2	chr1_207064068_207064316	GAGGGGAGATTAACACTGTCCAGAAATCCGAAAATCTCTTTGTAGGTGTGGAGAGTGGACCTGGATAGGAGGAAAGGGAGGGTGCTATTTTAGGAGTACAGTAGTCTCCCTTTATCTGTGGTTTCACTTCCTGTGATTTCAGTTTGCTGAGTCAGCAGTGGTTTGAAAATATTTATTACATGGAAAATTCCGGAAATAAACAATTCATAAGTTTAAATCGCGTGCTACTCTGAGCAGCGTGATAAAGTC	+	chr1_207064068_207064316_CREB1_MA0018.3_center151	CREB1	ACTGACGTCAACA	151	MAF	TGCTGAGTCAGCA	174	204	214	177	149	205	1.75076	3.12366	-1.37289	0.472913	-2.65074	1.27785
chr1_207064068_207064316_CREB1_MA0018.3_center151_to_MECP2_HUMAN.H11MO.0.C	chr1_207064068_207064316	GAGGGGAGATTAACACTGTCCAGAAATCCGAAAATCTCTTTGTAGGTGTGGAGAGTGGACCTGGATAGGAGGAAAGGGAGGGTGCTATTTTAGGAGTACAGTAGTCTCCCTTTATCTGTGGTTTCACTTCCTGTGATTTCAGTTACTCCCGGAGACAGTGGTTTGAAAATATTTATTACATGGAAAATTCCGGAAATAAACAATTCATAAGTTTAAATCGCGTGCTACTCTGAGCAGCGTGATAAAGTC	+	chr1_207064068_207064316_CREB1_MA0018.3_center151	CREB1	GACGTCA	151	MECP2	CCCGGAG	344	386	360	145	126	176	0.61413	3.12366	-2.50953	0.472913	-2.65074	0.141217
chr1_207064068_207064316_CREB1_MA0018.3_center151_to_TP53_MA0106.3	chr1_207064068_207064316	GAGGGGAGATTAACACTGTCCAGAAATCCGAAAATCTCTTTGTAGGTGTGGAGAGTGGACCTGGATAGGAGGAAAGGGAGGGTGCTATTTTAGGAGTACAGTAGTCTCCCTTTATCTGTGGTTTCACTTCCTGTGATTTCAGTACATGCCCGGGCATGTGGTTTGAAAATATTTATTACATGGAAAATTCCGGAAATAAACAATTCATAAGTTTAAATCGCGTGCTACTCTGAGCAGCGTGATAAAGTC	+	chr1_207064068_207064316_CREB1_MA0018.3_center151	CREB1	TACTGACGTCAACAGT	151	P53	ACATGCCCGGGCATGT	155	168	165	345	337	404	3.07868	3.12366	-0.0449766	0.472913	-2.65074	2.60577
chr1_207064068_207064316_ETS1_HUMAN.H11MO.0.A_center129_to_CREB1_MA0018.3	chr1_207064068_207064316	GAGGGGAGATTAACACTGTCCAGAAATCCGAAAATCTCTTTGTAGGTGTGGAGAGTGGACCTGGATAGGAGGAAAGGGAGGGTGCTATTTTAGGAGTACAGTAGTCTCCCTTTATCTGTGGTTTCTGACGTCATGATTTCAGTTACTGACGTCAACAGTGGTTTGAAAATATTTATTACATGGAAAATTCCGGAAATAAACAATTCATAAGTTTAAATCGCGTGCTACTCTGAGCAGCGTGATAAAGTC	+	chr1_207064068_207064316_ETS1_HUMAN.H11MO.0.A_center129	ETS	ACTTCCTG	129	CREB1	TGACGTCA	406	464	392	313	359	262	1.56238	3.12366	-1.56128	2.03644	-1.08721	-0.474062
chr1_207064068_207064316_ETS1_HUMAN.H11MO.0.A_center129_to_E2F1_HUMAN.H11MO.0.A	chr1_207064068_207064316	GAGGGGAGATTAACACTGTCCAGAAATCCGAAAATCTCTTTGTAGGTGTGGAGAGTGGACCTGGATAGGAGGAAAGGGAGGGTGCTATTTTAGGAGTACAGTAGTCTCCCTTTATCTGTGGTTTCGGCGGGAATGATTTCAGTTACTGACGTCAACAGTGGTTTGAAAATATTTATTACATGGAAAATTCCGGAAATAAACAATTCATAAGTTTAAATCGCGTGCTACTCTGAGCAGCGTGATAAAGTC	+	chr1_207064068_207064316_ETS1_HUMAN.H11MO.0.A_center129	ETS	ACTTCCTG	129	E2F1	GGCGGGAA	99	92	107	96	93	94	1.86494	3.12366	-1.25872	2.03644	-1.08721	-0.171501
chr1_207064068_207064316_ETS1_HUMAN.H11MO.0.A_center129_to_EGR1_C2H2_1	chr1_207064068_207064316	GAGGGGAGATTAACACTGTCCAGAAATCCGAAAATCTCTTTGTAGGTGTGGAGAGTGGACCTGGATAGGAGGAAAGGGAGGGTGCTATTTTAGGAGTACAGTAGTCTCCCTTTATCTGTGGTTACGCCCACGCAGATTTCAGTTACTGACGTCAACAGTGGTTTGAAAATATTTATTACATGGAAAATTCCGGAAATAAACAATTCATAAGTTTAAATCGCGTGCTACTCTGAGCAGCGTGATAAAGTC	+	chr1_207064068_207064316_ETS1_HUMAN.H11MO.0.A_center129	ETS	TCACTTCCTGT	129	EGR1	ACGCCCACGCA	78	86	75	106	78	84	2.10839	3.12366	-1.01527	2.03644	-1.08721	0.0719469
chr1_207064068_207064316_ETS1_HUMAN.H11MO.0.A_center129_to_FOSL1_MA0477.1	chr1_207064068_207064316	GAGGGGAGATTAACACTGTCCAGAAATCCGAAAATCTCTTTGTAGGTGTGGAGAGTGGACCTGGATAGGAGGAAAGGGAGGGTGCTATTTTAGGAGTACAGTAGTCTCCCTTTATCTGTGGTTTGTGACTCATTGATTTCAGTTACTGACGTCAACAGTGGTTTGAAAATATTTATTACATGGAAAATTCCGGAAATAAACAATTCATAAGTTTAAATCGCGTGCTACTCTGAGCAGCGTGATAAAGTC	+	chr1_207064068_207064316_ETS1_HUMAN.H11MO.0.A_center129	ETS	CACTTCCTG	129	AP-1	GTGACTCAT	136	148	153	403	358	336	3.29757	3.12366	0.17391	2.03644	-1.08721	1.26112
chr1_207064068_207064316_ETS1_HUMAN.H11MO.0.A_center129_to_MAFK_MA0496.2	chr1_207064068_207064316	GAGGGGAGATTAACACTGTCCAGAAATCCGAAAATCTCTTTGTAGGTGTGGAGAGTGGACCTGGATAGGAGGAAAGGGAGGGTGCTATTTTAGGAGTACAGTAGTCTCCCTTTATCTGTGGTTGCTGAGTCAGCAATTTCAGTTACTGACGTCAACAGTGGTTTGAAAATATTTATTACATGGAAAATTCCGGAAATAAACAATTCATAAGTTTAAATCGCGTGCTACTCTGAGCAGCGTGATAAAGTC	+	chr1_207064068_207064316_ETS1_HUMAN.H11MO.0.A_center129	ETS	TTCACTTCCTGTG	129	MAF	TGCTGAGTCAGCA	124	115	126	177	172	163	2.4449	3.12366	-0.678753	2.03644	-1.08721	0.408462
chr1_207064068_207064316_ETS1_HUMAN.H11MO.0.A_center129_to_MECP2_HUMAN.H11MO.0.C	chr1_207064068_207064316	GAGGGGAGATTAACACTGTCCAGAAATCCGAAAATCTCTTTGTAGGTGTGGAGAGTGGACCTGGATAGGAGGAAAGGGAGGGTGCTATTTTAGGAGTACAGTAGTCTCCCTTTATCTGTGGTTTCCCCGGAGGTGATTTCAGTTACTGACGTCAACAGTGGTTTGAAAATATTTATTACATGGAAAATTCCGGAAATAAACAATTCATAAGTTTAAATCGCGTGCTACTCTGAGCAGCGTGATAAAGTC	+	chr1_207064068_207064316_ETS1_HUMAN.H11MO.0.A_center129	ETS	ACTTCCT	129	MECP2	CCCGGAG	129	122	130	143	162	151	2.2111	3.12366	-0.912558	2.03644	-1.08721	0.174656
chr1_207064068_207064316_ETS1_HUMAN.H11MO.0.A_center129_to_TP53_MA0106.3	chr1_207064068_207064316	GAGGGGAGATTAACACTGTCCAGAAATCCGAAAATCTCTTTGTAGGTGTGGAGAGTGGACCTGGATAGGAGGAAAGGGAGGGTGCTATTTTAGGAGTACAGTAGTCTCCCTTTATCTGTGGACATGCCCGGGCATGTTTCAGTTACTGACGTCAACAGTGGTTTGAAAATATTTATTACATGGAAAATTCCGGAAATAAACAATTCATAAGTTTAAATCGCGTGCTACTCTGAGCAGCGTGATAAAGTC	+	chr1_207064068_207064316_ETS1_HUMAN.H11MO.0.A_center129	ETS	TTTCACTTCCTGTGAT	129	P53	ACATGCCCGGGCATGT	189	216	216	796	663	1005	3.88398	3.12366	0.760326	2.03644	-1.08721	1.84754
chr1_209577365_209577613_FOSL1_MA0477.1_center125_to_CREB1_MA0018.3	chr1_209577365_209577613	TAAGAATGCTATAAAAAGGGCTCTTGCTTGGGATAACCAGTGTCGAATCTGACTGAGATTCCTCCTATTGATCTTCTGTGACTCACGGACAGAGCAGAGGAAGAGGATTTGAAATTTAGCCTGACGTCATTCCCGGTGACCTGGTATTAAGGTGATTCTTAGGTATGCCTGAGCTGTCCTGGAAAGGTCTCTGTGCCAAGGCAATTTGGGTGCCCAGGGTCCAGGTCAGTGACTCCAACCCAACCACCA	-	chr1_209577365_209577613_FOSL1_MA0477.1_center125	AP-1	TGACTCAC	125	CREB1	TGACGTCA	515	576	535	625	594	512	2.07139	3.20848	-1.13709	0.244662	-2.96382	1.82673
chr1_209577365_209577613_FOSL1_MA0477.1_center125_to_E2F1_HUMAN.H11MO.0.A	chr1_209577365_209577613	TAAGAATGCTATAAAAAGGGCTCTTGCTTGGGATAACCAGTGTCGAATCTGACTGAGATTCCTCCTATTGATCTTCTGTGACTCACGGACAGAGCAGAGGAAGAGGATTTGAAATTTAGCCGGCGGGAATTCCCGGTGACCTGGTATTAAGGTGATTCTTAGGTATGCCTGAGCTGTCCTGGAAAGGTCTCTGTGCCAAGGCAATTTGGGTGCCCAGGGTCCAGGTCAGTGACTCCAACCCAACCACCA	-	chr1_209577365_209577613_FOSL1_MA0477.1_center125	AP-1	TGACTCAC	125	E2F1	GGCGGGAA	189	216	185	111	86	183	1.20387	3.20848	-2.00461	0.244662	-2.96382	0.959204
chr1_209577365_209577613_FOSL1_MA0477.1_center125_to_EGR1_C2H2_1	chr1_209577365_209577613	TAAGAATGCTATAAAAAGGGCTCTTGCTTGGGATAACCAGTGTCGAATCTGACTGAGATTCCTCCTATTGATCTTCTGTGACTCACGGACAGAGCAGAGGAAGAGGATTTGAAATTTAGACGCCCACGCATCCCGGTGACCTGGTATTAAGGTGATTCTTAGGTATGCCTGAGCTGTCCTGGAAAGGTCTCTGTGCCAAGGCAATTTGGGTGCCCAGGGTCCAGGTCAGTGACTCCAACCCAACCACCA	-	chr1_209577365_209577613_FOSL1_MA0477.1_center125	AP-1	CCTGACTCACT	125	EGR1	ACGCCCACGCA	535	512	539	447	413	463	1.67633	3.20848	-1.53215	0.244662	-2.96382	1.43167
chr1_209577365_209577613_FOSL1_MA0477.1_center125_to_ETS1_HUMAN.H11MO.0.A	chr1_209577365_209577613	TAAGAATGCTATAAAAAGGGCTCTTGCTTGGGATAACCAGTGTCGAATCTGACTGAGATTCCTCCTATTGATCTTCTGTGACTCACGGACAGAGCAGAGGAAGAGGATTTGAAATTTAGCACCGGAAGTTTCCCGGTGACCTGGTATTAAGGTGATTCTTAGGTATGCCTGAGCTGTCCTGGAAAGGTCTCTGTGCCAAGGCAATTTGGGTGCCCAGGGTCCAGGTCAGTGACTCCAACCCAACCACCA	-	chr1_209577365_209577613_FOSL1_MA0477.1_center125	AP-1	CTGACTCAC	125	ETS	ACCGGAAGT	316	318	314	189	160	215	1.15899	3.20848	-2.04949	0.244662	-2.96382	0.914332
chr1_209577365_209577613_FOSL1_MA0477.1_center125_to_MECP2_HUMAN.H11MO.0.C	chr1_209577365_209577613	TAAGAATGCTATAAAAAGGGCTCTTGCTTGGGATAACCAGTGTCGAATCTGACTGAGATTCCTCCTATTGATCTTCTGTGACTCACGGACAGAGCAGAGGAAGAGGATTTGAAATTTAGCCCCCGGAGCTTCCCGGTGACCTGGTATTAAGGTGATTCTTAGGTATGCCTGAGCTGTCCTGGAAAGGTCTCTGTGCCAAGGCAATTTGGGTGCCCAGGGTCCAGGTCAGTGACTCCAACCCAACCACCA	-	chr1_209577365_209577613_FOSL1_MA0477.1_center125	AP-1	TGACTCA	125	MECP2	CCCGGAG	203	304	244	77	99	139	0.628364	3.20848	-2.58012	0.244662	-2.96382	0.383702
chr1_209577365_209577613_FOSL1_MA0477.1_center125_to_TP53_MA0106.3	chr1_209577365_209577613	TAAGAATGCTATAAAAAGGGCTCTTGCTTGGGATAACCAGTGTCGAATCTGACTGAGATTCCTCCTATTGATCTTCTGTGACTCACGGACAGAGCAGAGGAAGAGGATTTGAAATTTACATGCCCGGGCATGTCGGTGACCTGGTATTAAGGTGATTCTTAGGTATGCCTGAGCTGTCCTGGAAAGGTCTCTGTGCCAAGGCAATTTGGGTGCCCAGGGTCCAGGTCAGTGACTCCAACCCAACCACCA	-	chr1_209577365_209577613_FOSL1_MA0477.1_center125	AP-1	AGCCTGACTCACTTCC	125	P53	ACATGCCCGGGCATGT	274	296	284	1211	948	1552	4.00422	3.20848	0.795741	0.244662	-2.96382	3.75956
chr1_209577365_209577613_FOSL1_MA0477.1_center82_to_CREB1_MA0018.3	chr1_209577365_209577613	TAAGAATGCTATAAAAAGGGCTCTTGCTTGGGATAACCAGTGTCGAATCTGACTGAGATTCCTCCTATTGATCTTCTGTGACGTCAGGACAGAGCAGAGGAAGAGGATTTGAAATTTAGCCTGACTCACTTCCCGGTGACCTGGTATTAAGGTGATTCTTAGGTATGCCTGAGCTGTCCTGGAAAGGTCTCTGTGCCAAGGCAATTTGGGTGCCCAGGGTCCAGGTCAGTGACTCCAACCCAACCACCA	-	chr1_209577365_209577613_FOSL1_MA0477.1_center82	AP-1	TGACTCAC	82	CREB1	TGACGTCA	175	171	161	193	152	148	1.92069	3.20848	-1.28779	0.658228	-2.55025	1.26246
chr1_209577365_209577613_FOSL1_MA0477.1_center82_to_E2F1_HUMAN.H11MO.0.A	chr1_209577365_209577613	TAAGAATGCTATAAAAAGGGCTCTTGCTTGGGATAACCAGTGTCGAATCTGACTGAGATTCCTCCTATTGATCTTCTGGGCGGGAAGGACAGAGCAGAGGAAGAGGATTTGAAATTTAGCCTGACTCACTTCCCGGTGACCTGGTATTAAGGTGATTCTTAGGTATGCCTGAGCTGTCCTGGAAAGGTCTCTGTGCCAAGGCAATTTGGGTGCCCAGGGTCCAGGTCAGTGACTCCAACCCAACCACCA	-	chr1_209577365_209577613_FOSL1_MA0477.1_center82	AP-1	TGACTCAC	82	E2F1	GGCGGGAA	168	212	201	81	87	140	0.950532	3.20848	-2.25795	0.658228	-2.55025	0.292304
chr1_209577365_209577613_FOSL1_MA0477.1_center82_to_EGR1_C2H2_1	chr1_209577365_209577613	TAAGAATGCTATAAAAAGGGCTCTTGCTTGGGATAACCAGTGTCGAATCTGACTGAGATTCCTCCTATTGATCTTCACGCCCACGCAGACAGAGCAGAGGAAGAGGATTTGAAATTTAGCCTGACTCACTTCCCGGTGACCTGGTATTAAGGTGATTCTTAGGTATGCCTGAGCTGTCCTGGAAAGGTCTCTGTGCCAAGGCAATTTGGGTGCCCAGGGTCCAGGTCAGTGACTCCAACCCAACCACCA	-	chr1_209577365_209577613_FOSL1_MA0477.1_center82	AP-1	TGTGACTCACG	82	EGR1	ACGCCCACGCA	274	284	267	490	422	447	2.67121	3.20848	-0.537274	0.658228	-2.55025	2.01298
chr1_209577365_209577613_FOSL1_MA0477.1_center82_to_ETS1_HUMAN.H11MO.0.A	chr1_209577365_209577613	TAAGAATGCTATAAAAAGGGCTCTTGCTTGGGATAACCAGTGTCGAATCTGACTGAGATTCCTCCTATTGATCTTCTACCGGAAGTGGACAGAGCAGAGGAAGAGGATTTGAAATTTAGCCTGACTCACTTCCCGGTGACCTGGTATTAAGGTGATTCTTAGGTATGCCTGAGCTGTCCTGGAAAGGTCTCTGTGCCAAGGCAATTTGGGTGCCCAGGGTCCAGGTCAGTGACTCCAACCCAACCACCA	-	chr1_209577365_209577613_FOSL1_MA0477.1_center82	AP-1	GTGACTCAC	82	ETS	ACCGGAAGT	462	474	436	514	453	625	2.11989	3.20848	-1.08859	0.658228	-2.55025	1.46167
chr1_209577365_209577613_FOSL1_MA0477.1_center82_to_MECP2_HUMAN.H11MO.0.C	chr1_209577365_209577613	TAAGAATGCTATAAAAAGGGCTCTTGCTTGGGATAACCAGTGTCGAATCTGACTGAGATTCCTCCTATTGATCTTCTGCCCGGAGCGGACAGAGCAGAGGAAGAGGATTTGAAATTTAGCCTGACTCACTTCCCGGTGACCTGGTATTAAGGTGATTCTTAGGTATGCCTGAGCTGTCCTGGAAAGGTCTCTGTGCCAAGGCAATTTGGGTGCCCAGGGTCCAGGTCAGTGACTCCAACCCAACCACCA	-	chr1_209577365_209577613_FOSL1_MA0477.1_center82	AP-1	TGACTCA	82	MECP2	CCCGGAG	471	520	540	204	204	308	0.785946	3.20848	-2.42253	0.658228	-2.55025	0.127718
chr1_209577365_209577613_FOSL1_MA0477.1_center82_to_TP53_MA0106.3	chr1_209577365_209577613	TAAGAATGCTATAAAAAGGGCTCTTGCTTGGGATAACCAGTGTCGAATCTGACTGAGATTCCTCCTATTGATCTACATGCCCGGGCATGTAGAGCAGAGGAAGAGGATTTGAAATTTAGCCTGACTCACTTCCCGGTGACCTGGTATTAAGGTGATTCTTAGGTATGCCTGAGCTGTCCTGGAAAGGTCTCTGTGCCAAGGCAATTTGGGTGCCCAGGGTCCAGGTCAGTGACTCCAACCCAACCACCA	-	chr1_209577365_209577613_FOSL1_MA0477.1_center82	AP-1	TCTGTGACTCACGGAC	82	P53	ACATGCCCGGGCATGT	231	223	248	1558	1202	1745	4.58889	3.20848	1.38041	0.658228	-2.55025	3.93066
chr1_209577365_209577613_MECP2_HUMAN.H11MO.0.C_center134_to_CREB1_MA0018.3	chr1_209577365_209577613	TAAGAATGCTATAAAAAGGGCTCTTGCTTGGGATAACCAGTGTCGAATCTGACTGAGATTCCTCCTATTGATCTTCTGTGACTCACGGACAGAGCAGAGGAAGAGGATTTGAAATTTAGCCTGACTCACTTGACGTCAACCTGGTATTAAGGTGATTCTTAGGTATGCCTGAGCTGTCCTGGAAAGGTCTCTGTGCCAAGGCAATTTGGGTGCCCAGGGTCCAGGTCAGTGACTCCAACCCAACCACCA	-	chr1_209577365_209577613_MECP2_HUMAN.H11MO.0.C_center134	MECP2	TCCCGGTG	134	CREB1	TGACGTCA	227	219	211	206	180	207	1.78358	3.20848	-1.4249	1.74595	-1.46253	0.0376291
chr1_209577365_209577613_MECP2_HUMAN.H11MO.0.C_center134_to_E2F1_HUMAN.H11MO.0.A	chr1_209577365_209577613	TAAGAATGCTATAAAAAGGGCTCTTGCTTGGGATAACCAGTGTCGAATCTGACTGAGATTCCTCCTATTGATCTTCTGTGACTCACGGACAGAGCAGAGGAAGAGGATTTGAAATTTAGCCTGACTCACTGGCGGGAAACCTGGTATTAAGGTGATTCTTAGGTATGCCTGAGCTGTCCTGGAAAGGTCTCTGTGCCAAGGCAATTTGGGTGCCCAGGGTCCAGGTCAGTGACTCCAACCCAACCACCA	-	chr1_209577365_209577613_MECP2_HUMAN.H11MO.0.C_center134	MECP2	TCCCGGTG	134	E2F1	GGCGGGAA	230	202	196	105	89	164	1.04144	3.20848	-2.16704	1.74595	-1.46253	-0.704517
chr1_209577365_209577613_MECP2_HUMAN.H11MO.0.C_center134_to_EGR1_C2H2_1	chr1_209577365_209577613	TAAGAATGCTATAAAAAGGGCTCTTGCTTGGGATAACCAGTGTCGAATCTGACTGAGATTCCTCCTATTGATCTTCTGTGACTCACGGACAGAGCAGAGGAAGAGGATTTGAAATTTAGCCTGACTCAACGCCCACGCACCTGGTATTAAGGTGATTCTTAGGTATGCCTGAGCTGTCCTGGAAAGGTCTCTGTGCCAAGGCAATTTGGGTGCCCAGGGTCCAGGTCAGTGACTCCAACCCAACCACCA	-	chr1_209577365_209577613_MECP2_HUMAN.H11MO.0.C_center134	MECP2	CTTCCCGGTGA	134	EGR1	ACGCCCACGCA	478	513	468	301	262	397	1.28512	3.20848	-1.92336	1.74595	-1.46253	-0.460838
chr1_209577365_209577613_MECP2_HUMAN.H11MO.0.C_center134_to_FOSL1_MA0477.1	chr1_209577365_209577613	TAAGAATGCTATAAAAAGGGCTCTTGCTTGGGATAACCAGTGTCGAATCTGACTGAGATTCCTCCTATTGATCTTCTGTGACTCACGGACAGAGCAGAGGAAGAGGATTTGAAATTTAGCCTGACTCACGTGACTCATACCTGGTATTAAGGTGATTCTTAGGTATGCCTGAGCTGTCCTGGAAAGGTCTCTGTGCCAAGGCAATTTGGGTGCCCAGGGTCCAGGTCAGTGACTCCAACCCAACCACCA	-	chr1_209577365_209577613_MECP2_HUMAN.H11MO.0.C_center134	MECP2	TTCCCGGTG	134	AP-1	GTGACTCAT	402	448	421	282	294	351	1.46609	3.20848	-1.74239	1.74595	-1.46253	-0.279864
chr1_209577365_209577613_MECP2_HUMAN.H11MO.0.C_center134_to_MAFK_MA0496.2	chr1_209577365_209577613	TAAGAATGCTATAAAAAGGGCTCTTGCTTGGGATAACCAGTGTCGAATCTGACTGAGATTCCTCCTATTGATCTTCTGTGACTCACGGACAGAGCAGAGGAAGAGGATTTGAAATTTAGCCTGACTCTGCTGAGTCAGCACTGGTATTAAGGTGATTCTTAGGTATGCCTGAGCTGTCCTGGAAAGGTCTCTGTGCCAAGGCAATTTGGGTGCCCAGGGTCCAGGTCAGTGACTCCAACCCAACCACCA	-	chr1_209577365_209577613_MECP2_HUMAN.H11MO.0.C_center134	MECP2	ACTTCCCGGTGAC	134	MAF	TGCTGAGTCAGCA	587	571	587	230	204	299	0.640668	3.20848	-2.56781	1.74595	-1.46253	-1.10529
chr1_209577365_209577613_MECP2_HUMAN.H11MO.0.C_center134_to_TP53_MA0106.3	chr1_209577365_209577613	TAAGAATGCTATAAAAAGGGCTCTTGCTTGGGATAACCAGTGTCGAATCTGACTGAGATTCCTCCTATTGATCTTCTGTGACTCACGGACAGAGCAGAGGAAGAGGATTTGAAATTTAGCCTGACTACATGCCCGGGCATGTGGTATTAAGGTGATTCTTAGGTATGCCTGAGCTGTCCTGGAAAGGTCTCTGTGCCAAGGCAATTTGGGTGCCCAGGGTCCAGGTCAGTGACTCCAACCCAACCACCA	-	chr1_209577365_209577613_MECP2_HUMAN.H11MO.0.C_center134	MECP2	CACTTCCCGGTGACCT	134	P53	ACATGCCCGGGCATGT	216	242	231	620	501	768	3.34946	3.20848	0.140977	1.74595	-1.46253	1.6035
chr1_209830520_209830768_EGR1_C2H2_1_center100_to_CREB1_MA0018.3	chr1_209830520_209830768	TTCTTCCATCTCAGAGGCTCCAGCACATACCAGCAGGGTTTCCTCCTTCATACCAACAGGGGTGGCTCTGACTAAGGACAGGAGCACGCCAGGAGGTGACGTCAGAAGGTGACCGCAACATTCTGGTGAGCTGACAAGGTGAAGCAGAGGACGTGACGAGAGGATGACACAACTTCCCCTTTGCCAAAGGAAGGAGATCCCCTGCCCTGAGGTCAAGAGCCTGGGCCACCTCACAGGCTACAGCTCCTT	+	chr1_209830520_209830768_EGR1_C2H2_1_center100	EGR1	CGTGGACA	100	CREB1	TGACGTCA	246	226	284	3293	2892	2678	5.52664	5.16252	0.364122	3.49667	-1.66585	2.02997
chr1_209830520_209830768_EGR1_C2H2_1_center100_to_E2F1_HUMAN.H11MO.0.A	chr1_209830520_209830768	TTCTTCCATCTCAGAGGCTCCAGCACATACCAGCAGGGTTTCCTCCTTCATACCAACAGGGGTGGCTCTGACTAAGGACAGGAGCACGCCAGGAGGGGCGGGAAGAAGGTGACCGCAACATTCTGGTGAGCTGACAAGGTGAAGCAGAGGACGTGACGAGAGGATGACACAACTTCCCCTTTGCCAAAGGAAGGAGATCCCCTGCCCTGAGGTCAAGAGCCTGGGCCACCTCACAGGCTACAGCTCCTT	+	chr1_209830520_209830768_EGR1_C2H2_1_center100	EGR1	CGTGGACA	100	E2F1	GGCGGGAA	171	168	199	1296	1089	1209	4.68835	5.16252	-0.474171	3.49667	-1.66585	1.19168
chr1_209830520_209830768_EGR1_C2H2_1_center100_to_ETS1_HUMAN.H11MO.0.A	chr1_209830520_209830768	TTCTTCCATCTCAGAGGCTCCAGCACATACCAGCAGGGTTTCCTCCTTCATACCAACAGGGGTGGCTCTGACTAAGGACAGGAGCACGCCAGGAGACCGGAAGTGAAGGTGACCGCAACATTCTGGTGAGCTGACAAGGTGAAGCAGAGGACGTGACGAGAGGATGACACAACTTCCCCTTTGCCAAAGGAAGGAGATCCCCTGCCCTGAGGTCAAGAGCCTGGGCCACCTCACAGGCTACAGCTCCTT	+	chr1_209830520_209830768_EGR1_C2H2_1_center100	EGR1	GCGTGGACA	100	ETS	ACCGGAAGT	165	168	162	2391	2012	2117	5.67546	5.16252	0.512939	3.49667	-1.66585	2.17879
chr1_209830520_209830768_EGR1_C2H2_1_center100_to_FOSL1_MA0477.1	chr1_209830520_209830768	TTCTTCCATCTCAGAGGCTCCAGCACATACCAGCAGGGTTTCCTCCTTCATACCAACAGGGGTGGCTCTGACTAAGGACAGGAGCACGCCAGGAGGTGACTCATGAAGGTGACCGCAACATTCTGGTGAGCTGACAAGGTGAAGCAGAGGACGTGACGAGAGGATGACACAACTTCCCCTTTGCCAAAGGAAGGAGATCCCCTGCCCTGAGGTCAAGAGCCTGGGCCACCTCACAGGCTACAGCTCCTT	+	chr1_209830520_209830768_EGR1_C2H2_1_center100	EGR1	GCGTGGACA	100	AP-1	GTGACTCAT	137	144	137	1892	1684	1780	5.63257	5.16252	0.470051	3.49667	-1.66585	2.1359
chr1_209830520_209830768_EGR1_C2H2_1_center100_to_MAFK_MA0496.2	chr1_209830520_209830768	TTCTTCCATCTCAGAGGCTCCAGCACATACCAGCAGGGTTTCCTCCTTCATACCAACAGGGGTGGCTCTGACTAAGGACAGGAGCACGCCAGGTGCTGAGTCAGCAAGGTGACCGCAACATTCTGGTGAGCTGACAAGGTGAAGCAGAGGACGTGACGAGAGGATGACACAACTTCCCCTTTGCCAAAGGAAGGAGATCCCCTGCCCTGAGGTCAAGAGCCTGGGCCACCTCACAGGCTACAGCTCCTT	+	chr1_209830520_209830768_EGR1_C2H2_1_center100	EGR1	AGGCGTGGACAGA	100	MAF	TGCTGAGTCAGCA	509	502	531	5105	4512	4609	5.16491	5.16252	0.00238789	3.49667	-1.66585	1.66824
chr1_209830520_209830768_EGR1_C2H2_1_center100_to_MECP2_HUMAN.H11MO.0.C	chr1_209830520_209830768	TTCTTCCATCTCAGAGGCTCCAGCACATACCAGCAGGGTTTCCTCCTTCATACCAACAGGGGTGGCTCTGACTAAGGACAGGAGCACGCCAGGAGGCCCGGAGAGAAGGTGACCGCAACATTCTGGTGAGCTGACAAGGTGAAGCAGAGGACGTGACGAGAGGATGACACAACTTCCCCTTTGCCAAAGGAAGGAGATCCCCTGCCCTGAGGTCAAGAGCCTGGGCCACCTCACAGGCTACAGCTCCTT	+	chr1_209830520_209830768_EGR1_C2H2_1_center100	EGR1	CGTGGAC	100	MECP2	CCCGGAG	122	128	123	692	645	737	4.41166	5.16252	-0.750862	3.49667	-1.66585	0.914988
chr1_209830520_209830768_EGR1_C2H2_1_center100_to_TP53_MA0106.3	chr1_209830520_209830768	TTCTTCCATCTCAGAGGCTCCAGCACATACCAGCAGGGTTTCCTCCTTCATACCAACAGGGGTGGCTCTGACTAAGGACAGGAGCACGCCAGACATGCCCGGGCATGTGTGACCGCAACATTCTGGTGAGCTGACAAGGTGAAGCAGAGGACGTGACGAGAGGATGACACAACTTCCCCTTTGCCAAAGGAAGGAGATCCCCTGCCCTGAGGTCAAGAGCCTGGGCCACCTCACAGGCTACAGCTCCTT	+	chr1_209830520_209830768_EGR1_C2H2_1_center100	EGR1	GAGGCGTGGACAGAAG	100	P53	ACATGCCCGGGCATGT	170	172	195	3287	2667	4009	6.11251	5.16252	0.949982	3.49667	-1.66585	2.61583
chr1_212769734_212769982_TP53_MA0106.3_center69_to_E2F1_HUMAN.H11MO.0.A	chr1_212769734_212769982	TATAGAGCCTTAGCTTTAACTTTCACACCCCCCACAGCACTCTTCTGCCTTGGCTCTGTTACATGGGCGGGAATGTAGAACCAAAGGAAACACAAAGTGAAAATGAAACGAATGTTCCACCTGAGTCACTGTCTGTGTTTCTCTTTTATCACCAAAGCAATGAACTCCCACACAACTGAGGCTTGTTCTATTTAGGTTGTAAAACGTCATCTTTGTAATTAAAGCACACTATTATTGTTATAAAGTAAA	-	chr1_212769734_212769982_TP53_MA0106.3_center69	P53	TCCTGACA	69	E2F1	GGCGGGAA	115	129	147	34	51	53	0.405165	3.3806	-2.97544	0.0855155	-3.29509	0.31965
chr1_212769734_212769982_TP53_MA0106.3_center69_to_EGR1_C2H2_1	chr1_212769734_212769982	TATAGAGCCTTAGCTTTAACTTTCACACCCCCCACAGCACTCTTCTGCCTTGGCTCTGTTACAACGCCCACGCAGTAGAACCAAAGGAAACACAAAGTGAAAATGAAACGAATGTTCCACCTGAGTCACTGTCTGTGTTTCTCTTTTATCACCAAAGCAATGAACTCCCACACAACTGAGGCTTGTTCTATTTAGGTTGTAAAACGTCATCTTTGTAATTAAAGCACACTATTATTGTTATAAAGTAAA	-	chr1_212769734_212769982_TP53_MA0106.3_center69	P53	TGTCCTGACAT	69	EGR1	ACGCCCACGCA	179	215	230	70	77	119	0.64084	3.3806	-2.73976	0.0855155	-3.29509	0.555325
chr1_212769734_212769982_TP53_MA0106.3_center69_to_ETS1_HUMAN.H11MO.0.A	chr1_212769734_212769982	TATAGAGCCTTAGCTTTAACTTTCACACCCCCCACAGCACTCTTCTGCCTTGGCTCTGTTACATACCGGAAGTTGTAGAACCAAAGGAAACACAAAGTGAAAATGAAACGAATGTTCCACCTGAGTCACTGTCTGTGTTTCTCTTTTATCACCAAAGCAATGAACTCCCACACAACTGAGGCTTGTTCTATTTAGGTTGTAAAACGTCATCTTTGTAATTAAAGCACACTATTATTGTTATAAAGTAAA	-	chr1_212769734_212769982_TP53_MA0106.3_center69	P53	GTCCTGACA	69	ETS	ACCGGAAGT	112	109	107	50	47	65	0.866811	3.3806	-2.51379	0.0855155	-3.29509	0.781295
chr1_212769734_212769982_TP53_MA0106.3_center69_to_FOSL1_MA0477.1	chr1_212769734_212769982	TATAGAGCCTTAGCTTTAACTTTCACACCCCCCACAGCACTCTTCTGCCTTGGCTCTGTTACATGTGACTCATTGTAGAACCAAAGGAAACACAAAGTGAAAATGAAACGAATGTTCCACCTGAGTCACTGTCTGTGTTTCTCTTTTATCACCAAAGCAATGAACTCCCACACAACTGAGGCTTGTTCTATTTAGGTTGTAAAACGTCATCTTTGTAATTAAAGCACACTATTATTGTTATAAAGTAAA	-	chr1_212769734_212769982_TP53_MA0106.3_center69	P53	GTCCTGACA	69	AP-1	GTGACTCAT	179	190	156	85	106	120	1.15621	3.3806	-2.22439	0.0855155	-3.29509	1.07069
chr1_212769734_212769982_TP53_MA0106.3_center69_to_MAFK_MA0496.2	chr1_212769734_212769982	TATAGAGCCTTAGCTTTAACTTTCACACCCCCCACAGCACTCTTCTGCCTTGGCTCTGTTACTGCTGAGTCAGCATAGAACCAAAGGAAACACAAAGTGAAAATGAAACGAATGTTCCACCTGAGTCACTGTCTGTGTTTCTCTTTTATCACCAAAGCAATGAACTCCCACACAACTGAGGCTTGTTCTATTTAGGTTGTAAAACGTCATCTTTGTAATTAAAGCACACTATTATTGTTATAAAGTAAA	-	chr1_212769734_212769982_TP53_MA0106.3_center69	P53	ATGTCCTGACATG	69	MAF	TGCTGAGTCAGCA	109	131	117	52	47	61	0.73935	3.3806	-2.64125	0.0855155	-3.29509	0.653835
chr1_214996855_214997103_EGR1_C2H2_1_center184_to_CREB1_MA0018.3	chr1_214996855_214997103	TAGGTGTGTCTGAACTCAAACTCTCCTTGGGCAGGTCTTGCTGTGGCTGCTGTGGGGGATGGTGGTGAGACTCCCAGGTGACTGGAGTTGTGTATCTAGGAGGATTATGGCTGCTTCTGCTGAGTCATGCAGGTTGTTCCGGAAGTGGAGGAAAGCCGGTAGTCACAGGCCTCACCCAGCTGACGTCAGCAAACCGAAGGGCCCGTCTCCCTCCCACCATGCTCCCTGCAACTGCCCCCAGACTGTTTC	+	chr1_214996855_214997103_EGR1_C2H2_1_center184	EGR1	TCCCACAC	184	CREB1	TGACGTCA	299	318	325	1397	1136	1424	4.00053	3.9107	0.0898228	2.78319	-1.12752	1.21734
chr1_214996855_214997103_EGR1_C2H2_1_center184_to_E2F1_HUMAN.H11MO.0.A	chr1_214996855_214997103	TAGGTGTGTCTGAACTCAAACTCTCCTTGGGCAGGTCTTGCTGTGGCTGCTGTGGGGGATGGTGGTGAGACTCCCAGGTGACTGGAGTTGTGTATCTAGGAGGATTATGGCTGCTTCTGCTGAGTCATGCAGGTTGTTCCGGAAGTGGAGGAAAGCCGGTAGTCACAGGCCTCACCCAGCGGCGGGAAGCAAACCGAAGGGCCCGTCTCCCTCCCACCATGCTCCCTGCAACTGCCCCCAGACTGTTTC	+	chr1_214996855_214997103_EGR1_C2H2_1_center184	EGR1	TCCCACAC	184	E2F1	GGCGGGAA	577	614	638	1258	869	1653	2.9141	3.9107	-0.996608	2.78319	-1.12752	0.130911
chr1_214996855_214997103_EGR1_C2H2_1_center184_to_ETS1_HUMAN.H11MO.0.A	chr1_214996855_214997103	TAGGTGTGTCTGAACTCAAACTCTCCTTGGGCAGGTCTTGCTGTGGCTGCTGTGGGGGATGGTGGTGAGACTCCCAGGTGACTGGAGTTGTGTATCTAGGAGGATTATGGCTGCTTCTGCTGAGTCATGCAGGTTGTTCCGGAAGTGGAGGAAAGCCGGTAGTCACAGGCCTCACCCAGACCGGAAGTGCAAACCGAAGGGCCCGTCTCCCTCCCACCATGCTCCCTGCAACTGCCCCCAGACTGTTTC	+	chr1_214996855_214997103_EGR1_C2H2_1_center184	EGR1	CTCCCACAC	184	ETS	ACCGGAAGT	255	272	282	951	729	1319	3.75851	3.9107	-0.152197	2.78319	-1.12752	0.975321
chr1_214996855_214997103_EGR1_C2H2_1_center184_to_FOSL1_MA0477.1	chr1_214996855_214997103	TAGGTGTGTCTGAACTCAAACTCTCCTTGGGCAGGTCTTGCTGTGGCTGCTGTGGGGGATGGTGGTGAGACTCCCAGGTGACTGGAGTTGTGTATCTAGGAGGATTATGGCTGCTTCTGCTGAGTCATGCAGGTTGTTCCGGAAGTGGAGGAAAGCCGGTAGTCACAGGCCTCACCCAGGTGACTCATGCAAACCGAAGGGCCCGTCTCCCTCCCACCATGCTCCCTGCAACTGCCCCCAGACTGTTTC	+	chr1_214996855_214997103_EGR1_C2H2_1_center184	EGR1	CTCCCACAC	184	AP-1	GTGACTCAT	427	486	453	3037	2417	2968	4.55973	3.9107	0.649023	2.78319	-1.12752	1.77654
chr1_214996855_214997103_EGR1_C2H2_1_center184_to_MAFK_MA0496.2	chr1_214996855_214997103	TAGGTGTGTCTGAACTCAAACTCTCCTTGGGCAGGTCTTGCTGTGGCTGCTGTGGGGGATGGTGGTGAGACTCCCAGGTGACTGGAGTTGTGTATCTAGGAGGATTATGGCTGCTTCTGCTGAGTCATGCAGGTTGTTCCGGAAGTGGAGGAAAGCCGGTAGTCACAGGCCTCACCCTGCTGAGTCAGCAAAACCGAAGGGCCCGTCTCCCTCCCACCATGCTCCCTGCAACTGCCCCCAGACTGTTTC	+	chr1_214996855_214997103_EGR1_C2H2_1_center184	EGR1	AGCTCCCACACGC	184	MAF	TGCTGAGTCAGCA	214	224	251	878	617	848	3.68892	3.9107	-0.221789	2.78319	-1.12752	0.905729
chr1_214996855_214997103_EGR1_C2H2_1_center184_to_MECP2_HUMAN.H11MO.0.C	chr1_214996855_214997103	TAGGTGTGTCTGAACTCAAACTCTCCTTGGGCAGGTCTTGCTGTGGCTGCTGTGGGGGATGGTGGTGAGACTCCCAGGTGACTGGAGTTGTGTATCTAGGAGGATTATGGCTGCTTCTGCTGAGTCATGCAGGTTGTTCCGGAAGTGGAGGAAAGCCGGTAGTCACAGGCCTCACCCAGCCCCGGAGCGCAAACCGAAGGGCCCGTCTCCCTCCCACCATGCTCCCTGCAACTGCCCCCAGACTGTTTC	+	chr1_214996855_214997103_EGR1_C2H2_1_center184	EGR1	TCCCACA	184	MECP2	CCCGGAG	671	644	698	2320	1721	2648	3.63137	3.9107	-0.279338	2.78319	-1.12752	0.848181
chr1_214996855_214997103_EGR1_C2H2_1_center184_to_TP53_MA0106.3	chr1_214996855_214997103	TAGGTGTGTCTGAACTCAAACTCTCCTTGGGCAGGTCTTGCTGTGGCTGCTGTGGGGGATGGTGGTGAGACTCCCAGGTGACTGGAGTTGTGTATCTAGGAGGATTATGGCTGCTTCTGCTGAGTCATGCAGGTTGTTCCGGAAGTGGAGGAAAGCCGGTAGTCACAGGCCTCACCACATGCCCGGGCATGTACCGAAGGGCCCGTCTCCCTCCCACCATGCTCCCTGCAACTGCCCCCAGACTGTTTC	+	chr1_214996855_214997103_EGR1_C2H2_1_center184	EGR1	CAGCTCCCACACGCAA	184	P53	ACATGCCCGGGCATGT	525	575	558	2087	1582	2860	3.84665	3.9107	-0.0640508	2.78319	-1.12752	1.06347
chr1_214996855_214997103_FOSL1_MA0477.1_center124_to_CREB1_MA0018.3	chr1_214996855_214997103	TAGGTGTGTCTGAACTCAAACTCTCCTTGGGCAGGTCTTGCTGTGGCTGCTGTGGGGGATGGTGGTGAGACTCCCAGGTGACTGGAGTTGTGTATCTAGGAGGATTATGGCTGCTTCTGCTGACGTCAGCAGGTTGTTCCGGAAGTGGAGGAAAGCCGGTAGTCACAGGCCTCACCCAGCTCCCACACGCAAACCGAAGGGCCCGTCTCCCTCCCACCATGCTCCCTGCAACTGCCCCCAGACTGTTTC	+	chr1_214996855_214997103_FOSL1_MA0477.1_center124	AP-1	TGAGTCAT	124	CREB1	TGACGTCA	603	604	616	807	704	1089	2.39903	3.9107	-1.51167	0.997212	-2.91349	1.40182
chr1_214996855_214997103_FOSL1_MA0477.1_center124_to_E2F1_HUMAN.H11MO.0.A	chr1_214996855_214997103	TAGGTGTGTCTGAACTCAAACTCTCCTTGGGCAGGTCTTGCTGTGGCTGCTGTGGGGGATGGTGGTGAGACTCCCAGGTGACTGGAGTTGTGTATCTAGGAGGATTATGGCTGCTTCTGCGGCGGGAAGCAGGTTGTTCCGGAAGTGGAGGAAAGCCGGTAGTCACAGGCCTCACCCAGCTCCCACACGCAAACCGAAGGGCCCGTCTCCCTCCCACCATGCTCCCTGCAACTGCCCCCAGACTGTTTC	+	chr1_214996855_214997103_FOSL1_MA0477.1_center124	AP-1	TGAGTCAT	124	E2F1	GGCGGGAA	292	316	338	211	133	281	1.25723	3.9107	-2.65347	0.997212	-2.91349	0.260023
chr1_214996855_214997103_FOSL1_MA0477.1_center124_to_EGR1_C2H2_1	chr1_214996855_214997103	TAGGTGTGTCTGAACTCAAACTCTCCTTGGGCAGGTCTTGCTGTGGCTGCTGTGGGGGATGGTGGTGAGACTCCCAGGTGACTGGAGTTGTGTATCTAGGAGGATTATGGCTGCTTCTACGCCCACGCACAGGTTGTTCCGGAAGTGGAGGAAAGCCGGTAGTCACAGGCCTCACCCAGCTCCCACACGCAAACCGAAGGGCCCGTCTCCCTCCCACCATGCTCCCTGCAACTGCCCCCAGACTGTTTC	+	chr1_214996855_214997103_FOSL1_MA0477.1_center124	AP-1	GCTGAGTCATG	124	EGR1	ACGCCCACGCA	459	481	501	586	429	638	2.10364	3.9107	-1.80706	0.997212	-2.91349	1.10643
chr1_214996855_214997103_FOSL1_MA0477.1_center124_to_ETS1_HUMAN.H11MO.0.A	chr1_214996855_214997103	TAGGTGTGTCTGAACTCAAACTCTCCTTGGGCAGGTCTTGCTGTGGCTGCTGTGGGGGATGGTGGTGAGACTCCCAGGTGACTGGAGTTGTGTATCTAGGAGGATTATGGCTGCTTCTGACCGGAAGTGCAGGTTGTTCCGGAAGTGGAGGAAAGCCGGTAGTCACAGGCCTCACCCAGCTCCCACACGCAAACCGAAGGGCCCGTCTCCCTCCCACCATGCTCCCTGCAACTGCCCCCAGACTGTTTC	+	chr1_214996855_214997103_FOSL1_MA0477.1_center124	AP-1	CTGAGTCAT	124	ETS	ACCGGAAGT	257	246	267	315	227	369	2.13128	3.9107	-1.77942	0.997212	-2.91349	1.13407
chr1_214996855_214997103_FOSL1_MA0477.1_center124_to_MECP2_HUMAN.H11MO.0.C	chr1_214996855_214997103	TAGGTGTGTCTGAACTCAAACTCTCCTTGGGCAGGTCTTGCTGTGGCTGCTGTGGGGGATGGTGGTGAGACTCCCAGGTGACTGGAGTTGTGTATCTAGGAGGATTATGGCTGCTTCTGCCCCGGAGTGCAGGTTGTTCCGGAAGTGGAGGAAAGCCGGTAGTCACAGGCCTCACCCAGCTCCCACACGCAAACCGAAGGGCCCGTCTCCCTCCCACCATGCTCCCTGCAACTGCCCCCAGACTGTTTC	+	chr1_214996855_214997103_FOSL1_MA0477.1_center124	AP-1	TGAGTCA	124	MECP2	CCCGGAG	259	288	270	225	159	277	1.5729	3.9107	-2.3378	0.997212	-2.91349	0.575689
chr1_214996855_214997103_FOSL1_MA0477.1_center124_to_TP53_MA0106.3	chr1_214996855_214997103	TAGGTGTGTCTGAACTCAAACTCTCCTTGGGCAGGTCTTGCTGTGGCTGCTGTGGGGGATGGTGGTGAGACTCCCAGGTGACTGGAGTTGTGTATCTAGGAGGATTATGGCTGCTTACATGCCCGGGCATGTGTTGTTCCGGAAGTGGAGGAAAGCCGGTAGTCACAGGCCTCACCCAGCTCCCACACGCAAACCGAAGGGCCCGTCTCCCTCCCACCATGCTCCCTGCAACTGCCCCCAGACTGTTTC	+	chr1_214996855_214997103_FOSL1_MA0477.1_center124	AP-1	CTGCTGAGTCATGCAG	124	P53	ACATGCCCGGGCATGT	321	343	352	1729	1293	1873	4.17876	3.9107	0.268061	0.997212	-2.91349	3.18155
chr1_214996855_214997103_MAFK_MA0496.2_center124_to_FOSL1_MA0477.1	chr1_214996855_214997103	TAGGTGTGTCTGAACTCAAACTCTCCTTGGGCAGGTCTTGCTGTGGCTGCTGTGGGGGATGGTGGTGAGACTCCCAGGTGACTGGAGTTGTGTATCTAGGAGGATTATGGCTGCTTCTGGTGACTCATGCAGGTTGTTCCGGAAGTGGAGGAAAGCCGGTAGTCACAGGCCTCACCCAGCTCCCACACGCAAACCGAAGGGCCCGTCTCCCTCCCACCATGCTCCCTGCAACTGCCCCCAGACTGTTTC	+	chr1_214996855_214997103_MAFK_MA0496.2_center124	MAF	CTGAGTCAT	124	AP-1	GTGACTCAT	349	340	389	656	569	654	2.74097	3.9107	-1.16973	1.57987	-2.33084	1.16111
chr1_217833748_217833996_ETS1_HUMAN.H11MO.0.A_center97_to_CREB1_MA0018.3	chr1_217833748_217833996	GAACACCTCTTTAAAGCTTCAGTTTGGGTGTGGCATATATCCCATCTGCTCACAACACATAGACAAGCCCCACATCGGTGGGATGAGTATGAATGACGTCATTTATGAAGAAGGGGAGATGGGATGACTAATTTTGAACAAGAATACAATCCACCCTGGCACATACTGATGTTAATCATCATCTACATTGGTCATAGCAAACATCTTCCAACTTGTATCCCTGTGAATCATTTATCCAGTTGGTAAAAA	-	chr1_217833748_217833996_ETS1_HUMAN.H11MO.0.A_center97	ETS	TCATCCTT	97	CREB1	TGACGTCA	203	202	215	555	558	392	3.28704	3.59691	-0.309871	0.391291	-3.20562	2.89575
chr1_217833748_217833996_ETS1_HUMAN.H11MO.0.A_center97_to_E2F1_HUMAN.H11MO.0.A	chr1_217833748_217833996	GAACACCTCTTTAAAGCTTCAGTTTGGGTGTGGCATATATCCCATCTGCTCACAACACATAGACAAGCCCCACATCGGTGGGATGAGTATGAAGGCGGGAATTTATGAAGAAGGGGAGATGGGATGACTAATTTTGAACAAGAATACAATCCACCCTGGCACATACTGATGTTAATCATCATCTACATTGGTCATAGCAAACATCTTCCAACTTGTATCCCTGTGAATCATTTATCCAGTTGGTAAAAA	-	chr1_217833748_217833996_ETS1_HUMAN.H11MO.0.A_center97	ETS	TCATCCTT	97	E2F1	GGCGGGAA	84	77	81	107	109	127	2.41972	3.59691	-1.17719	0.391291	-3.20562	2.02843
chr1_217833748_217833996_ETS1_HUMAN.H11MO.0.A_center97_to_EGR1_C2H2_1	chr1_217833748_217833996	GAACACCTCTTTAAAGCTTCAGTTTGGGTGTGGCATATATCCCATCTGCTCACAACACATAGACAAGCCCCACATCGGTGGGATGAGTATGACGCCCACGCATTATGAAGAAGGGGAGATGGGATGACTAATTTTGAACAAGAATACAATCCACCCTGGCACATACTGATGTTAATCATCATCTACATTGGTCATAGCAAACATCTTCCAACTTGTATCCCTGTGAATCATTTATCCAGTTGGTAAAAA	-	chr1_217833748_217833996_ETS1_HUMAN.H11MO.0.A_center97	ETS	AATCATCCTTT	97	EGR1	ACGCCCACGCA	48	45	45	54	49	63	2.16267	3.59691	-1.43424	0.391291	-3.20562	1.77138
chr1_217833748_217833996_ETS1_HUMAN.H11MO.0.A_center97_to_FOSL1_MA0477.1	chr1_217833748_217833996	GAACACCTCTTTAAAGCTTCAGTTTGGGTGTGGCATATATCCCATCTGCTCACAACACATAGACAAGCCCCACATCGGTGGGATGAGTATGAGTGACTCATTTTATGAAGAAGGGGAGATGGGATGACTAATTTTGAACAAGAATACAATCCACCCTGGCACATACTGATGTTAATCATCATCTACATTGGTCATAGCAAACATCTTCCAACTTGTATCCCTGTGAATCATTTATCCAGTTGGTAAAAA	-	chr1_217833748_217833996_ETS1_HUMAN.H11MO.0.A_center97	ETS	ATCATCCTT	97	AP-1	GTGACTCAT	46	48	35	150	145	109	3.63496	3.59691	0.0380476	0.391291	-3.20562	3.24366
chr1_217833748_217833996_ETS1_HUMAN.H11MO.0.A_center97_to_MAFK_MA0496.2	chr1_217833748_217833996	GAACACCTCTTTAAAGCTTCAGTTTGGGTGTGGCATATATCCCATCTGCTCACAACACATAGACAAGCCCCACATCGGTGGGATGAGTATTGCTGAGTCAGCATATGAAGAAGGGGAGATGGGATGACTAATTTTGAACAAGAATACAATCCACCCTGGCACATACTGATGTTAATCATCATCTACATTGGTCATAGCAAACATCTTCCAACTTGTATCCCTGTGAATCATTTATCCAGTTGGTAAAAA	-	chr1_217833748_217833996_ETS1_HUMAN.H11MO.0.A_center97	ETS	GAATCATCCTTTT	97	MAF	TGCTGAGTCAGCA	79	70	94	116	114	102	2.41159	3.59691	-1.18532	0.391291	-3.20562	2.0203
chr1_217833748_217833996_ETS1_HUMAN.H11MO.0.A_center97_to_MECP2_HUMAN.H11MO.0.C	chr1_217833748_217833996	GAACACCTCTTTAAAGCTTCAGTTTGGGTGTGGCATATATCCCATCTGCTCACAACACATAGACAAGCCCCACATCGGTGGGATGAGTATGAACCCGGAGTTTTATGAAGAAGGGGAGATGGGATGACTAATTTTGAACAAGAATACAATCCACCCTGGCACATACTGATGTTAATCATCATCTACATTGGTCATAGCAAACATCTTCCAACTTGTATCCCTGTGAATCATTTATCCAGTTGGTAAAAA	-	chr1_217833748_217833996_ETS1_HUMAN.H11MO.0.A_center97	ETS	TCATCCT	97	MECP2	CCCGGAG	38	60	59	22	17	39	0.832044	3.59691	-2.76486	0.391291	-3.20562	0.440753
chr1_217833748_217833996_ETS1_HUMAN.H11MO.0.A_center97_to_TP53_MA0106.3	chr1_217833748_217833996	GAACACCTCTTTAAAGCTTCAGTTTGGGTGTGGCATATATCCCATCTGCTCACAACACATAGACAAGCCCCACATCGGTGGGATGAGTAACATGCCCGGGCATGTTGAAGAAGGGGAGATGGGATGACTAATTTTGAACAAGAATACAATCCACCCTGGCACATACTGATGTTAATCATCATCTACATTGGTCATAGCAAACATCTTCCAACTTGTATCCCTGTGAATCATTTATCCAGTTGGTAAAAA	-	chr1_217833748_217833996_ETS1_HUMAN.H11MO.0.A_center97	ETS	TGAATCATCCTTTTTA	97	P53	ACATGCCCGGGCATGT	43	54	47	305	254	341	4.55834	3.59691	0.961427	0.391291	-3.20562	4.16704
chr1_217833748_217833996_TP53_MA0106.3_center209_to_E2F1_HUMAN.H11MO.0.A	chr1_217833748_217833996	GAACACCTCTTTAAAGCTTCAGTTTGGGTGTGGCATATATCCCATCTGCTCACAACACATAGACAAGCCCCACATCGGTGGGATGAGTATGAATCATCCTTTTTATGAAGAAGGGGAGATGGGATGACTAATTTTGAACAAGAATACAATCCACCCTGGCACATACTGATGTTAATCATCATCTACATTGGTCATAGCAAACATCGGCGGGAATGTATCCCTGTGAATCATTTATCCAGTTGGTAAAAA	-	chr1_217833748_217833996_TP53_MA0106.3_center209	P53	TTCCAACT	209	E2F1	GGCGGGAA	42	35	35	113	92	107	3.40425	3.59691	-0.192655	1.50388	-2.09303	1.90037
chr1_217833748_217833996_TP53_MA0106.3_center209_to_EGR1_C2H2_1	chr1_217833748_217833996	GAACACCTCTTTAAAGCTTCAGTTTGGGTGTGGCATATATCCCATCTGCTCACAACACATAGACAAGCCCCACATCGGTGGGATGAGTATGAATCATCCTTTTTATGAAGAAGGGGAGATGGGATGACTAATTTTGAACAAGAATACAATCCACCCTGGCACATACTGATGTTAATCATCATCTACATTGGTCATAGCAAACAACGCCCACGCAGTATCCCTGTGAATCATTTATCCAGTTGGTAAAAA	-	chr1_217833748_217833996_TP53_MA0106.3_center209	P53	TCTTCCAACTT	209	EGR1	ACGCCCACGCA	152	151	147	1065	958	838	4.64896	3.59691	1.05206	1.50388	-2.09303	3.14509
chr1_217833748_217833996_TP53_MA0106.3_center209_to_ETS1_HUMAN.H11MO.0.A	chr1_217833748_217833996	GAACACCTCTTTAAAGCTTCAGTTTGGGTGTGGCATATATCCCATCTGCTCACAACACATAGACAAGCCCCACATCGGTGGGATGAGTATGAATCATCCTTTTTATGAAGAAGGGGAGATGGGATGACTAATTTTGAACAAGAATACAATCCACCCTGGCACATACTGATGTTAATCATCATCTACATTGGTCATAGCAAACATACCGGAAGTTGTATCCCTGTGAATCATTTATCCAGTTGGTAAAAA	-	chr1_217833748_217833996_TP53_MA0106.3_center209	P53	CTTCCAACT	209	ETS	ACCGGAAGT	92	85	79	555	555	500	4.62179	3.59691	1.02488	1.50388	-2.09303	3.11791
chr1_217833748_217833996_TP53_MA0106.3_center209_to_FOSL1_MA0477.1	chr1_217833748_217833996	GAACACCTCTTTAAAGCTTCAGTTTGGGTGTGGCATATATCCCATCTGCTCACAACACATAGACAAGCCCCACATCGGTGGGATGAGTATGAATCATCCTTTTTATGAAGAAGGGGAGATGGGATGACTAATTTTGAACAAGAATACAATCCACCCTGGCACATACTGATGTTAATCATCATCTACATTGGTCATAGCAAACATGTGACTCATTGTATCCCTGTGAATCATTTATCCAGTTGGTAAAAA	-	chr1_217833748_217833996_TP53_MA0106.3_center209	P53	CTTCCAACT	209	AP-1	GTGACTCAT	77	72	66	589	549	453	4.87248	3.59691	1.27557	1.50388	-2.09303	3.3686
chr1_217833748_217833996_TP53_MA0106.3_center209_to_MAFK_MA0496.2	chr1_217833748_217833996	GAACACCTCTTTAAAGCTTCAGTTTGGGTGTGGCATATATCCCATCTGCTCACAACACATAGACAAGCCCCACATCGGTGGGATGAGTATGAATCATCCTTTTTATGAAGAAGGGGAGATGGGATGACTAATTTTGAACAAGAATACAATCCACCCTGGCACATACTGATGTTAATCATCATCTACATTGGTCATAGCAAACTGCTGAGTCAGCATATCCCTGTGAATCATTTATCCAGTTGGTAAAAA	-	chr1_217833748_217833996_TP53_MA0106.3_center209	P53	ATCTTCCAACTTG	209	MAF	TGCTGAGTCAGCA	172	155	192	861	827	729	4.19669	3.59691	0.59978	1.50388	-2.09303	2.69281
chr1_218774424_218774672_TP53_MA0106.3_center122_to_E2F1_HUMAN.H11MO.0.A	chr1_218774424_218774672	GAAAAGAAAGCAGATTTTGGGTTAAATGAGTAATGGAGAACTGAATACGCCCTATCCTCCAGGGAGAAGAGTTGGGAGAGGTTGGAGGAGGTGTGATTTTAAGTAAGTCTTGGACAAGGGCGGGAATGCCCAGCCCACAGGCAAGCAGGTAGGAGGTTGTTATGCTCCTTCAGGAATCAGGCCTGACTGAGGCCCTGTCCAGGATGGTGGAAAGGAAGGGCCACCACTAAGAAAGAATTGCCAGTACTT	+	chr1_218774424_218774672_TP53_MA0106.3_center122	P53	TCTGAACT	122	E2F1	GGCGGGAA	321	325	309	78	103	158	0.366275	3.41002	-3.04374	-0.372753	-3.78277	0.739028
chr1_218774424_218774672_TP53_MA0106.3_center122_to_EGR1_C2H2_1	chr1_218774424_218774672	GAAAAGAAAGCAGATTTTGGGTTAAATGAGTAATGGAGAACTGAATACGCCCTATCCTCCAGGGAGAAGAGTTGGGAGAGGTTGGAGGAGGTGTGATTTTAAGTAAGTCTTGGACAACGCCCACGCAGCCCAGCCCACAGGCAAGCAGGTAGGAGGTTGTTATGCTCCTTCAGGAATCAGGCCTGACTGAGGCCCTGTCCAGGATGGTGGAAAGGAAGGGCCACCACTAAGAAAGAATTGCCAGTACTT	+	chr1_218774424_218774672_TP53_MA0106.3_center122	P53	AGTCTGAACTT	122	EGR1	ACGCCCACGCA	226	269	253	71	64	138	0.375643	3.41002	-3.03438	-0.372753	-3.78277	0.748396
chr1_218774424_218774672_TP53_MA0106.3_center122_to_ETS1_HUMAN.H11MO.0.A	chr1_218774424_218774672	GAAAAGAAAGCAGATTTTGGGTTAAATGAGTAATGGAGAACTGAATACGCCCTATCCTCCAGGGAGAAGAGTTGGGAGAGGTTGGAGGAGGTGTGATTTTAAGTAAGTCTTGGACAAACCGGAAGTTGCCCAGCCCACAGGCAAGCAGGTAGGAGGTTGTTATGCTCCTTCAGGAATCAGGCCTGACTGAGGCCCTGTCCAGGATGGTGGAAAGGAAGGGCCACCACTAAGAAAGAATTGCCAGTACTT	+	chr1_218774424_218774672_TP53_MA0106.3_center122	P53	GTCTGAACT	122	ETS	ACCGGAAGT	172	169	236	92	89	188	1.18263	3.41002	-2.22739	-0.372753	-3.78277	1.55538
chr1_218774424_218774672_TP53_MA0106.3_center122_to_FOSL1_MA0477.1	chr1_218774424_218774672	GAAAAGAAAGCAGATTTTGGGTTAAATGAGTAATGGAGAACTGAATACGCCCTATCCTCCAGGGAGAAGAGTTGGGAGAGGTTGGAGGAGGTGTGATTTTAAGTAAGTCTTGGACAAGTGACTCATTGCCCAGCCCACAGGCAAGCAGGTAGGAGGTTGTTATGCTCCTTCAGGAATCAGGCCTGACTGAGGCCCTGTCCAGGATGGTGGAAAGGAAGGGCCACCACTAAGAAAGAATTGCCAGTACTT	+	chr1_218774424_218774672_TP53_MA0106.3_center122	P53	GTCTGAACT	122	AP-1	GTGACTCAT	111	155	140	50	45	81	0.65243	3.41002	-2.75759	-0.372753	-3.78277	1.02518
chr1_218774424_218774672_TP53_MA0106.3_center122_to_MAFK_MA0496.2	chr1_218774424_218774672	GAAAAGAAAGCAGATTTTGGGTTAAATGAGTAATGGAGAACTGAATACGCCCTATCCTCCAGGGAGAAGAGTTGGGAGAGGTTGGAGGAGGTGTGATTTTAAGTAAGTCTTGGACTGCTGAGTCAGCACCCAGCCCACAGGCAAGCAGGTAGGAGGTTGTTATGCTCCTTCAGGAATCAGGCCTGACTGAGGCCCTGTCCAGGATGGTGGAAAGGAAGGGCCACCACTAAGAAAGAATTGCCAGTACTT	+	chr1_218774424_218774672_TP53_MA0106.3_center122	P53	AAGTCTGAACTTG	122	MAF	TGCTGAGTCAGCA	145	140	145	51	39	85	0.540431	3.41002	-2.86959	-0.372753	-3.78277	0.913184
chr1_220509722_220509970_TP53_MA0106.3_center79_to_E2F1_HUMAN.H11MO.0.A	chr1_220509722_220509970	TTCCTGATTCATTCCTTATACATATAGGGAACCCAGCATGAGCCTAAGCTGGGTTCACTCTAGGACTCAGGCATGGGCGGGAATGTTGCAAAAACTCATGGGTCAGCAACAGAGACTTACTTATGAGAAAGGTAGAAGAACCTCCCGGAGAAGAACCTTTCTTAGGAAAGAGAGCTTCTAAGGCAAACAAGTTTGATACAAGGACAGTGGTCCAGAGTAGGAGGGGTAAAAGGGCAAAAGAAGTGAGAT	-	chr1_220509722_220509970_TP53_MA0106.3_center79	P53	TCAAGGCT	79	E2F1	GGCGGGAA	53	41	42	5	9	16	-0.344031	2.06422	-2.40825	-1.31121	-3.37543	0.967178
chr1_220509722_220509970_TP53_MA0106.3_center79_to_EGR1_C2H2_1	chr1_220509722_220509970	TTCCTGATTCATTCCTTATACATATAGGGAACCCAGCATGAGCCTAAGCTGGGTTCACTCTAGGACTCAGGCAACGCCCACGCAGTTGCAAAAACTCATGGGTCAGCAACAGAGACTTACTTATGAGAAAGGTAGAAGAACCTCCCGGAGAAGAACCTTTCTTAGGAAAGAGAGCTTCTAAGGCAAACAAGTTTGATACAAGGACAGTGGTCCAGAGTAGGAGGGGTAAAAGGGCAAAAGAAGTGAGAT	-	chr1_220509722_220509970_TP53_MA0106.3_center79	P53	TGTCAAGGCTT	79	EGR1	ACGCCCACGCA	183	174	176	30	22	35	-0.743414	2.06422	-2.80763	-1.31121	-3.37543	0.567795
chr1_220509722_220509970_TP53_MA0106.3_center79_to_ETS1_HUMAN.H11MO.0.A	chr1_220509722_220509970	TTCCTGATTCATTCCTTATACATATAGGGAACCCAGCATGAGCCTAAGCTGGGTTCACTCTAGGACTCAGGCATACCGGAAGTTGTTGCAAAAACTCATGGGTCAGCAACAGAGACTTACTTATGAGAAAGGTAGAAGAACCTCCCGGAGAAGAACCTTTCTTAGGAAAGAGAGCTTCTAAGGCAAACAAGTTTGATACAAGGACAGTGGTCCAGAGTAGGAGGGGTAAAAGGGCAAAAGAAGTGAGAT	-	chr1_220509722_220509970_TP53_MA0106.3_center79	P53	GTCAAGGCT	79	ETS	ACCGGAAGT	125	109	110	32	29	55	0.276518	2.06422	-1.7877	-1.31121	-3.37543	1.58773
chr1_220509722_220509970_TP53_MA0106.3_center79_to_FOSL1_MA0477.1	chr1_220509722_220509970	TTCCTGATTCATTCCTTATACATATAGGGAACCCAGCATGAGCCTAAGCTGGGTTCACTCTAGGACTCAGGCATGTGACTCATTGTTGCAAAAACTCATGGGTCAGCAACAGAGACTTACTTATGAGAAAGGTAGAAGAACCTCCCGGAGAAGAACCTTTCTTAGGAAAGAGAGCTTCTAAGGCAAACAAGTTTGATACAAGGACAGTGGTCCAGAGTAGGAGGGGTAAAAGGGCAAAAGAAGTGAGAT	-	chr1_220509722_220509970_TP53_MA0106.3_center79	P53	GTCAAGGCT	79	AP-1	GTGACTCAT	147	180	191	23	24	50	-0.581559	2.06422	-2.64578	-1.31121	-3.37543	0.72965
chr1_220509722_220509970_TP53_MA0106.3_center79_to_MAFK_MA0496.2	chr1_220509722_220509970	TTCCTGATTCATTCCTTATACATATAGGGAACCCAGCATGAGCCTAAGCTGGGTTCACTCTAGGACTCAGGCTGCTGAGTCAGCATTGCAAAAACTCATGGGTCAGCAACAGAGACTTACTTATGAGAAAGGTAGAAGAACCTCCCGGAGAAGAACCTTTCTTAGGAAAGAGAGCTTCTAAGGCAAACAAGTTTGATACAAGGACAGTGGTCCAGAGTAGGAGGGGTAAAAGGGCAAAAGAAGTGAGAT	-	chr1_220509722_220509970_TP53_MA0106.3_center79	P53	ATGTCAAGGCTTG	79	MAF	TGCTGAGTCAGCA	59	41	60	10	5	12	-0.718368	2.06422	-2.78259	-1.31121	-3.37543	0.592842
chr1_221613365_221613613_FOSL1_MA0477.1_center120_to_CREB1_MA0018.3	chr1_221613365_221613613	TCATCAGTATAGCTTCTGTCATAGTCATTTGGAGATGAAACATATTTTAATTAATATGTGCCCACTTCATTCTGAGGCTCTGTAGGTGGCACTCCCCAGGGGAAAGTCCCTAAAAGTGACGTCACGTGATTATTCATGTCCTGTGGCATCAGTCTTTGAAACCAATATCTACAGGAAATAAATACCAGGAATGTGAATGCAGATGCCTTGAGAAGACCACTAATCCTGCTATGATAAGTAACTGGGCAG	+	chr1_221613365_221613613_FOSL1_MA0477.1_center120	AP-1	TGAGTCAC	120	CREB1	TGACGTCA	148	153	153	551	631	372	3.80353	4.74947	-0.945944	0.946337	-3.80313	2.85719
chr1_221613365_221613613_FOSL1_MA0477.1_center120_to_E2F1_HUMAN.H11MO.0.A	chr1_221613365_221613613	TCATCAGTATAGCTTCTGTCATAGTCATTTGGAGATGAAACATATTTTAATTAATATGTGCCCACTTCATTCTGAGGCTCTGTAGGTGGCACTCCCCAGGGGAAAGTCCCTAAAAGGGCGGGAACGTGATTATTCATGTCCTGTGGCATCAGTCTTTGAAACCAATATCTACAGGAAATAAATACCAGGAATGTGAATGCAGATGCCTTGAGAAGACCACTAATCCTGCTATGATAAGTAACTGGGCAG	+	chr1_221613365_221613613_FOSL1_MA0477.1_center120	AP-1	TGAGTCAC	120	E2F1	GGCGGGAA	317	372	330	323	325	325	1.88691	4.74947	-2.86256	0.946337	-3.80313	0.940576
chr1_221613365_221613613_FOSL1_MA0477.1_center120_to_EGR1_C2H2_1	chr1_221613365_221613613	TCATCAGTATAGCTTCTGTCATAGTCATTTGGAGATGAAACATATTTTAATTAATATGTGCCCACTTCATTCTGAGGCTCTGTAGGTGGCACTCCCCAGGGGAAAGTCCCTAAAACGCCCACGCAGTGATTATTCATGTCCTGTGGCATCAGTCTTTGAAACCAATATCTACAGGAAATAAATACCAGGAATGTGAATGCAGATGCCTTGAGAAGACCACTAATCCTGCTATGATAAGTAACTGGGCAG	+	chr1_221613365_221613613_FOSL1_MA0477.1_center120	AP-1	AGTGAGTCACC	120	EGR1	ACGCCCACGCA	173	180	185	912	826	520	4.09559	4.74947	-0.65388	0.946337	-3.80313	3.14925
chr1_221613365_221613613_FOSL1_MA0477.1_center120_to_ETS1_HUMAN.H11MO.0.A	chr1_221613365_221613613	TCATCAGTATAGCTTCTGTCATAGTCATTTGGAGATGAAACATATTTTAATTAATATGTGCCCACTTCATTCTGAGGCTCTGTAGGTGGCACTCCCCAGGGGAAAGTCCCTAAAAACCGGAAGTCGTGATTATTCATGTCCTGTGGCATCAGTCTTTGAAACCAATATCTACAGGAAATAAATACCAGGAATGTGAATGCAGATGCCTTGAGAAGACCACTAATCCTGCTATGATAAGTAACTGGGCAG	+	chr1_221613365_221613613_FOSL1_MA0477.1_center120	AP-1	GTGAGTCAC	120	ETS	ACCGGAAGT	210	219	264	725	762	561	3.5663	4.74947	-1.18317	0.946337	-3.80313	2.61996
chr1_221613365_221613613_FOSL1_MA0477.1_center120_to_MECP2_HUMAN.H11MO.0.C	chr1_221613365_221613613	TCATCAGTATAGCTTCTGTCATAGTCATTTGGAGATGAAACATATTTTAATTAATATGTGCCCACTTCATTCTGAGGCTCTGTAGGTGGCACTCCCCAGGGGAAAGTCCCTAAAAGCCCGGAGCCGTGATTATTCATGTCCTGTGGCATCAGTCTTTGAAACCAATATCTACAGGAAATAAATACCAGGAATGTGAATGCAGATGCCTTGAGAAGACCACTAATCCTGCTATGATAAGTAACTGGGCAG	+	chr1_221613365_221613613_FOSL1_MA0477.1_center120	AP-1	TGAGTCA	120	MECP2	CCCGGAG	274	277	273	290	254	286	1.94855	4.74947	-2.80092	0.946337	-3.80313	1.00221
chr1_221613365_221613613_FOSL1_MA0477.1_center120_to_TP53_MA0106.3	chr1_221613365_221613613	TCATCAGTATAGCTTCTGTCATAGTCATTTGGAGATGAAACATATTTTAATTAATATGTGCCCACTTCATTCTGAGGCTCTGTAGGTGGCACTCCCCAGGGGAAAGTCCCTAACATGCCCGGGCATGTATTATTCATGTCCTGTGGCATCAGTCTTTGAAACCAATATCTACAGGAAATAAATACCAGGAATGTGAATGCAGATGCCTTGAGAAGACCACTAATCCTGCTATGATAAGTAACTGGGCAG	+	chr1_221613365_221613613_FOSL1_MA0477.1_center120	AP-1	AAAGTGAGTCACCGTG	120	P53	ACATGCCCGGGCATGT	257	258	235	1165	888	1377	4.08765	4.74947	-0.661824	0.946337	-3.80313	3.14131
chr1_222340711_222340959_EGR1_C2H2_1_center36_to_CREB1_MA0018.3	chr1_222340711_222340959	TAGCGTGAGTCTGACTCATATCCCACATACTGTGACGTCAGAGAATTGGGGTTTTGAGAGGTGAGTCAAGAGACTCCAGATGCCCACATGTTATTTTCACTGTGAGGCTGGACACTCATCATTAGACCATCCTCCAAAAGAGCTGTGTTGGTCACTTGTTCATTTCGGTGTGCATGAACTAAATCATAATAGTTTTTAGAAAGTGTATAAGCTGCCTATTAAAAAGTCAACCTCCAAAGTCACAATAGA	+	chr1_222340711_222340959_EGR1_C2H2_1_center36	EGR1	AGTGGGTT	36	CREB1	TGACGTCA	351	357	322	875	930	730	3.28941	2.35715	0.932263	0.689304	-1.66784	2.60011
chr1_222340711_222340959_EGR1_C2H2_1_center36_to_E2F1_HUMAN.H11MO.0.A	chr1_222340711_222340959	TAGCGTGAGTCTGACTCATATCCCACATACTGGGCGGGAAGAGAATTGGGGTTTTGAGAGGTGAGTCAAGAGACTCCAGATGCCCACATGTTATTTTCACTGTGAGGCTGGACACTCATCATTAGACCATCCTCCAAAAGAGCTGTGTTGGTCACTTGTTCATTTCGGTGTGCATGAACTAAATCATAATAGTTTTTAGAAAGTGTATAAGCTGCCTATTAAAAAGTCAACCTCCAAAGTCACAATAGA	+	chr1_222340711_222340959_EGR1_C2H2_1_center36	EGR1	AGTGGGTT	36	E2F1	GGCGGGAA	202	239	217	201	145	237	1.71362	2.35715	-0.643527	0.689304	-1.66784	1.02432
chr1_222340711_222340959_EGR1_C2H2_1_center36_to_ETS1_HUMAN.H11MO.0.A	chr1_222340711_222340959	TAGCGTGAGTCTGACTCATATCCCACATACTACCGGAAGTGAGAATTGGGGTTTTGAGAGGTGAGTCAAGAGACTCCAGATGCCCACATGTTATTTTCACTGTGAGGCTGGACACTCATCATTAGACCATCCTCCAAAAGAGCTGTGTTGGTCACTTGTTCATTTCGGTGTGCATGAACTAAATCATAATAGTTTTTAGAAAGTGTATAAGCTGCCTATTAAAAAGTCAACCTCCAAAGTCACAATAGA	+	chr1_222340711_222340959_EGR1_C2H2_1_center36	EGR1	GAGTGGGTT	36	ETS	ACCGGAAGT	84	90	86	198	193	179	3.09456	2.35715	0.737416	0.689304	-1.66784	2.40526
chr1_222340711_222340959_EGR1_C2H2_1_center36_to_FOSL1_MA0477.1	chr1_222340711_222340959	TAGCGTGAGTCTGACTCATATCCCACATACTGTGACTCATGAGAATTGGGGTTTTGAGAGGTGAGTCAAGAGACTCCAGATGCCCACATGTTATTTTCACTGTGAGGCTGGACACTCATCATTAGACCATCCTCCAAAAGAGCTGTGTTGGTCACTTGTTCATTTCGGTGTGCATGAACTAAATCATAATAGTTTTTAGAAAGTGTATAAGCTGCCTATTAAAAAGTCAACCTCCAAAGTCACAATAGA	+	chr1_222340711_222340959_EGR1_C2H2_1_center36	EGR1	GAGTGGGTT	36	AP-1	GTGACTCAT	96	128	106	389	363	359	3.71224	2.35715	1.3551	0.689304	-1.66784	3.02294
chr1_222340711_222340959_EGR1_C2H2_1_center36_to_MAFK_MA0496.2	chr1_222340711_222340959	TAGCGTGAGTCTGACTCATATCCCACATATGCTGAGTCAGCAGAATTGGGGTTTTGAGAGGTGAGTCAAGAGACTCCAGATGCCCACATGTTATTTTCACTGTGAGGCTGGACACTCATCATTAGACCATCCTCCAAAAGAGCTGTGTTGGTCACTTGTTCATTTCGGTGTGCATGAACTAAATCATAATAGTTTTTAGAAAGTGTATAAGCTGCCTATTAAAAAGTCAACCTCCAAAGTCACAATAGA	+	chr1_222340711_222340959_EGR1_C2H2_1_center36	EGR1	CTGAGTGGGTTGA	36	MAF	TGCTGAGTCAGCA	108	121	114	178	176	161	2.54962	2.35715	0.192473	0.689304	-1.66784	1.86032
chr1_222340711_222340959_EGR1_C2H2_1_center36_to_MECP2_HUMAN.H11MO.0.C	chr1_222340711_222340959	TAGCGTGAGTCTGACTCATATCCCACATACTGCCCGGAGTGAGAATTGGGGTTTTGAGAGGTGAGTCAAGAGACTCCAGATGCCCACATGTTATTTTCACTGTGAGGCTGGACACTCATCATTAGACCATCCTCCAAAAGAGCTGTGTTGGTCACTTGTTCATTTCGGTGTGCATGAACTAAATCATAATAGTTTTTAGAAAGTGTATAAGCTGCCTATTAAAAAGTCAACCTCCAAAGTCACAATAGA	+	chr1_222340711_222340959_EGR1_C2H2_1_center36	EGR1	AGTGGGT	36	MECP2	CCCGGAG	435	473	480	260	250	341	1.19665	2.35715	-1.1605	0.689304	-1.66784	0.507344
chr1_222340711_222340959_EGR1_C2H2_1_center36_to_TP53_MA0106.3	chr1_222340711_222340959	TAGCGTGAGTCTGACTCATATCCCACATACATGCCCGGGCATGTATTGGGGTTTTGAGAGGTGAGTCAAGAGACTCCAGATGCCCACATGTTATTTTCACTGTGAGGCTGGACACTCATCATTAGACCATCCTCCAAAAGAGCTGTGTTGGTCACTTGTTCATTTCGGTGTGCATGAACTAAATCATAATAGTTTTTAGAAAGTGTATAAGCTGCCTATTAAAAAGTCAACCTCCAAAGTCACAATAGA	+	chr1_222340711_222340959_EGR1_C2H2_1_center36	EGR1	ACTGAGTGGGTTGAGA	36	P53	ACATGCCCGGGCATGT	268	280	283	804	719	1081	3.53904	2.35715	1.18189	0.689304	-1.66784	2.84973
chr1_233315380_233315628_TP53_MA0106.3_center117_to_E2F1_HUMAN.H11MO.0.A	chr1_233315380_233315628	AACAAAGAAGAAGAGAAAGTTGCTCATGAAAGGTTTAAGGAAGCAATAACATTTCCAAATAGGGAAGGGGCATAAGCTATGAGCTAAGACTTGCCTGGGCCTGTCCAGACATGGGCGGGAAAGCCAAAGCAACTAACTGGGCTAAAGTGTAAGAACTGATAGTTGATAGGAGGCTTTAGAGTAAGAAGCTATTATTCCTAGTGTCTATTATTATATTTTTAAACCAAGACAAGCTTTGAAGAGGAACTT	-	chr1_233315380_233315628_TP53_MA0106.3_center117	P53	CTTGAGTA	117	E2F1	GGCGGGAA	28	36	47	79	72	108	3.10861	4.01644	-0.907825	2.129	-1.88743	0.979608
chr1_233315380_233315628_TP53_MA0106.3_center117_to_EGR1_C2H2_1	chr1_233315380_233315628	AACAAAGAAGAAGAGAAAGTTGCTCATGAAAGGTTTAAGGAAGCAATAACATTTCCAAATAGGGAAGGGGCATAAGCTATGAGCTAAGACTTGCCTGGGCCTGTCCAGACAACGCCCACGCAGCCAAAGCAACTAACTGGGCTAAAGTGTAAGAACTGATAGTTGATAGGAGGCTTTAGAGTAAGAAGCTATTATTCCTAGTGTCTATTATTATATTTTTAAACCAAGACAAGCTTTGAAGAGGAACTT	-	chr1_233315380_233315628_TP53_MA0106.3_center117	P53	TGCTTGAGTAA	117	EGR1	ACGCCCACGCA	44	37	37	118	118	176	3.68222	4.01644	-0.334211	2.129	-1.88743	1.55322
chr1_233315380_233315628_TP53_MA0106.3_center117_to_ETS1_HUMAN.H11MO.0.A	chr1_233315380_233315628	AACAAAGAAGAAGAGAAAGTTGCTCATGAAAGGTTTAAGGAAGCAATAACATTTCCAAATAGGGAAGGGGCATAAGCTATGAGCTAAGACTTGCCTGGGCCTGTCCAGACATACCGGAAGTAGCCAAAGCAACTAACTGGGCTAAAGTGTAAGAACTGATAGTTGATAGGAGGCTTTAGAGTAAGAAGCTATTATTCCTAGTGTCTATTATTATATTTTTAAACCAAGACAAGCTTTGAAGAGGAACTT	-	chr1_233315380_233315628_TP53_MA0106.3_center117	P53	GCTTGAGTA	117	ETS	ACCGGAAGT	54	48	46	173	136	226	3.72994	4.01644	-0.286495	2.129	-1.88743	1.60094
chr1_233315380_233315628_TP53_MA0106.3_center117_to_FOSL1_MA0477.1	chr1_233315380_233315628	AACAAAGAAGAAGAGAAAGTTGCTCATGAAAGGTTTAAGGAAGCAATAACATTTCCAAATAGGGAAGGGGCATAAGCTATGAGCTAAGACTTGCCTGGGCCTGTCCAGACATGTGACTCATAGCCAAAGCAACTAACTGGGCTAAAGTGTAAGAACTGATAGTTGATAGGAGGCTTTAGAGTAAGAAGCTATTATTCCTAGTGTCTATTATTATATTTTTAAACCAAGACAAGCTTTGAAGAGGAACTT	-	chr1_233315380_233315628_TP53_MA0106.3_center117	P53	GCTTGAGTA	117	AP-1	GTGACTCAT	63	66	75	354	326	503	4.42041	4.01644	0.403975	2.129	-1.88743	2.29141
chr1_233315380_233315628_TP53_MA0106.3_center117_to_MAFK_MA0496.2	chr1_233315380_233315628	AACAAAGAAGAAGAGAAAGTTGCTCATGAAAGGTTTAAGGAAGCAATAACATTTCCAAATAGGGAAGGGGCATAAGCTATGAGCTAAGACTTGCCTGGGCCTGTCCAGACTGCTGAGTCAGCACCAAAGCAACTAACTGGGCTAAAGTGTAAGAACTGATAGTTGATAGGAGGCTTTAGAGTAAGAAGCTATTATTCCTAGTGTCTATTATTATATTTTTAAACCAAGACAAGCTTTGAAGAGGAACTT	-	chr1_233315380_233315628_TP53_MA0106.3_center117	P53	ATGCTTGAGTAAG	117	MAF	TGCTGAGTCAGCA	32	31	43	74	77	127	3.25346	4.01644	-0.762976	2.129	-1.88743	1.12446
chr1_233315380_233315628_TP53_MA0106.3_center87_to_E2F1_HUMAN.H11MO.0.A	chr1_233315380_233315628	AACAAAGAAGAAGAGAAAGTTGCTCATGAAAGGTTTAAGGAAGCAATAACATTTCCAAATAGGGAAGGGGCATAAGCTATGAGGGCGGGAATGCCTGGGCCTGTCCAGACATGCTTGAGTAAGCCAAAGCAACTAACTGGGCTAAAGTGTAAGAACTGATAGTTGATAGGAGGCTTTAGAGTAAGAAGCTATTATTCCTAGTGTCTATTATTATATTTTTAAACCAAGACAAGCTTTGAAGAGGAACTT	-	chr1_233315380_233315628_TP53_MA0106.3_center87	P53	CTAAGACT	87	E2F1	GGCGGGAA	54	50	48	73	64	103	2.52986	4.01644	-1.48658	2.21648	-1.79995	0.313375
chr1_233315380_233315628_TP53_MA0106.3_center87_to_EGR1_C2H2_1	chr1_233315380_233315628	AACAAAGAAGAAGAGAAAGTTGCTCATGAAAGGTTTAAGGAAGCAATAACATTTCCAAATAGGGAAGGGGCATAAGCTATGACGCCCACGCAGCCTGGGCCTGTCCAGACATGCTTGAGTAAGCCAAAGCAACTAACTGGGCTAAAGTGTAAGAACTGATAGTTGATAGGAGGCTTTAGAGTAAGAAGCTATTATTCCTAGTGTCTATTATTATATTTTTAAACCAAGACAAGCTTTGAAGAGGAACTT	-	chr1_233315380_233315628_TP53_MA0106.3_center87	P53	AGCTAAGACTT	87	EGR1	ACGCCCACGCA	53	72	57	139	124	173	3.16084	4.01644	-0.855594	2.21648	-1.79995	0.944357
chr1_233315380_233315628_TP53_MA0106.3_center87_to_ETS1_HUMAN.H11MO.0.A	chr1_233315380_233315628	AACAAAGAAGAAGAGAAAGTTGCTCATGAAAGGTTTAAGGAAGCAATAACATTTCCAAATAGGGAAGGGGCATAAGCTATGAACCGGAAGTTGCCTGGGCCTGTCCAGACATGCTTGAGTAAGCCAAAGCAACTAACTGGGCTAAAGTGTAAGAACTGATAGTTGATAGGAGGCTTTAGAGTAAGAAGCTATTATTCCTAGTGTCTATTATTATATTTTTAAACCAAGACAAGCTTTGAAGAGGAACTT	-	chr1_233315380_233315628_TP53_MA0106.3_center87	P53	GCTAAGACT	87	ETS	ACCGGAAGT	81	69	58	190	159	262	3.42652	4.01644	-0.589914	2.21648	-1.79995	1.21004
chr1_233315380_233315628_TP53_MA0106.3_center87_to_FOSL1_MA0477.1	chr1_233315380_233315628	AACAAAGAAGAAGAGAAAGTTGCTCATGAAAGGTTTAAGGAAGCAATAACATTTCCAAATAGGGAAGGGGCATAAGCTATGAGTGACTCATTGCCTGGGCCTGTCCAGACATGCTTGAGTAAGCCAAAGCAACTAACTGGGCTAAAGTGTAAGAACTGATAGTTGATAGGAGGCTTTAGAGTAAGAAGCTATTATTCCTAGTGTCTATTATTATATTTTTAAACCAAGACAAGCTTTGAAGAGGAACTT	-	chr1_233315380_233315628_TP53_MA0106.3_center87	P53	GCTAAGACT	87	AP-1	GTGACTCAT	37	55	29	155	130	165	3.81436	4.01644	-0.202078	2.21648	-1.79995	1.59787
chr1_233315380_233315628_TP53_MA0106.3_center87_to_MAFK_MA0496.2	chr1_233315380_233315628	AACAAAGAAGAAGAGAAAGTTGCTCATGAAAGGTTTAAGGAAGCAATAACATTTCCAAATAGGGAAGGGGCATAAGCTATTGCTGAGTCAGCACCTGGGCCTGTCCAGACATGCTTGAGTAAGCCAAAGCAACTAACTGGGCTAAAGTGTAAGAACTGATAGTTGATAGGAGGCTTTAGAGTAAGAAGCTATTATTCCTAGTGTCTATTATTATATTTTTAAACCAAGACAAGCTTTGAAGAGGAACTT	-	chr1_233315380_233315628_TP53_MA0106.3_center87	P53	GAGCTAAGACTTG	87	MAF	TGCTGAGTCAGCA	118	105	109	206	182	272	2.87869	4.01644	-1.13774	2.21648	-1.79995	0.662207
chr1_233315380_233315628_TP53_MA0106.3_center97_to_E2F1_HUMAN.H11MO.0.A	chr1_233315380_233315628	AACAAAGAAGAAGAGAAAGTTGCTCATGAAAGGTTTAAGGAAGCAATAACATTTCCAAATAGGGAAGGGGCATAAGCTATGAGCTAAGACTTGGGCGGGAATGTCCAGACATGCTTGAGTAAGCCAAAGCAACTAACTGGGCTAAAGTGTAAGAACTGATAGTTGATAGGAGGCTTTAGAGTAAGAAGCTATTATTCCTAGTGTCTATTATTATATTTTTAAACCAAGACAAGCTTTGAAGAGGAACTT	-	chr1_233315380_233315628_TP53_MA0106.3_center97	P53	CCTGGGCC	97	E2F1	GGCGGGAA	46	67	52	17	12	29	0.33217	4.01644	-3.68427	-0.564794	-4.58123	0.896963
chr1_233315380_233315628_TP53_MA0106.3_center97_to_EGR1_C2H2_1	chr1_233315380_233315628	AACAAAGAAGAAGAGAAAGTTGCTCATGAAAGGTTTAAGGAAGCAATAACATTTCCAAATAGGGAAGGGGCATAAGCTATGAGCTAAGACTACGCCCACGCAGTCCAGACATGCTTGAGTAAGCCAAAGCAACTAACTGGGCTAAAGTGTAAGAACTGATAGTTGATAGGAGGCTTTAGAGTAAGAAGCTATTATTCCTAGTGTCTATTATTATATTTTTAAACCAAGACAAGCTTTGAAGAGGAACTT	-	chr1_233315380_233315628_TP53_MA0106.3_center97	P53	TGCCTGGGCCT	97	EGR1	ACGCCCACGCA	58	48	42	19	16	19	0.426581	4.01644	-3.58985	-0.564794	-4.58123	0.991375
chr1_233315380_233315628_TP53_MA0106.3_center97_to_ETS1_HUMAN.H11MO.0.A	chr1_233315380_233315628	AACAAAGAAGAAGAGAAAGTTGCTCATGAAAGGTTTAAGGAAGCAATAACATTTCCAAATAGGGAAGGGGCATAAGCTATGAGCTAAGACTTACCGGAAGTTGTCCAGACATGCTTGAGTAAGCCAAAGCAACTAACTGGGCTAAAGTGTAAGAACTGATAGTTGATAGGAGGCTTTAGAGTAAGAAGCTATTATTCCTAGTGTCTATTATTATATTTTTAAACCAAGACAAGCTTTGAAGAGGAACTT	-	chr1_233315380_233315628_TP53_MA0106.3_center97	P53	GCCTGGGCC	97	ETS	ACCGGAAGT	33	52	35	19	24	34	1.22638	4.01644	-2.79006	-0.564794	-4.58123	1.79117
chr1_233315380_233315628_TP53_MA0106.3_center97_to_FOSL1_MA0477.1	chr1_233315380_233315628	AACAAAGAAGAAGAGAAAGTTGCTCATGAAAGGTTTAAGGAAGCAATAACATTTCCAAATAGGGAAGGGGCATAAGCTATGAGCTAAGACTTGTGACTCATTGTCCAGACATGCTTGAGTAAGCCAAAGCAACTAACTGGGCTAAAGTGTAAGAACTGATAGTTGATAGGAGGCTTTAGAGTAAGAAGCTATTATTCCTAGTGTCTATTATTATATTTTTAAACCAAGACAAGCTTTGAAGAGGAACTT	-	chr1_233315380_233315628_TP53_MA0106.3_center97	P53	GCCTGGGCC	97	AP-1	GTGACTCAT	21	19	19	58	47	30	3.18315	4.01644	-0.833288	-0.564794	-4.58123	3.74794
chr1_233315380_233315628_TP53_MA0106.3_center97_to_MAFK_MA0496.2	chr1_233315380_233315628	AACAAAGAAGAAGAGAAAGTTGCTCATGAAAGGTTTAAGGAAGCAATAACATTTCCAAATAGGGAAGGGGCATAAGCTATGAGCTAAGACTGCTGAGTCAGCATCCAGACATGCTTGAGTAAGCCAAAGCAACTAACTGGGCTAAAGTGTAAGAACTGATAGTTGATAGGAGGCTTTAGAGTAAGAAGCTATTATTCCTAGTGTCTATTATTATATTTTTAAACCAAGACAAGCTTTGAAGAGGAACTT	-	chr1_233315380_233315628_TP53_MA0106.3_center97	P53	TTGCCTGGGCCTG	97	MAF	TGCTGAGTCAGCA	68	60	84	22	21	40	0.493125	4.01644	-3.52331	-0.564794	-4.58123	1.05792
chr1_236162895_236163143_E2F1_HUMAN.H11MO.0.A_center98_to_CREB1_MA0018.3	chr1_236162895_236163143	GATACATTGATGACTCAGACAAGCGTCTTCTTACTCATCTAGTTCGAGCTGCTAGGGAAGAAAGCATTCAAGACCTGATACTTATCTGAGGAGTTGACGTCAGTCTGGGGTGACTTTTCTCAAGGTGGGGGGACAAAGAGAATGAGAGGAAAATGAAACAGAGTGTAAACCAAAAATAAAATTCCAAGTCCGCCTACCATCGGAATGGACCCCTCCTCTCAGCCGAGGGCATTCCAAAGTCAACCTATG	+	chr1_236162895_236163143_E2F1_HUMAN.H11MO.0.A_center98	E2F1	GGCAGGAA	98	CREB1	TGACGTCA	140	155	148	336	391	272	3.17731	3.17073	0.00658352	1.43418	-1.73655	1.74313
chr1_236162895_236163143_E2F1_HUMAN.H11MO.0.A_center98_to_EGR1_C2H2_1	chr1_236162895_236163143	GATACATTGATGACTCAGACAAGCGTCTTCTTACTCATCTAGTTCGAGCTGCTAGGGAAGAAAGCATTCAAGACCTGATACTTATCTGAGGAACGCCCACGCATCTGGGGTGACTTTTCTCAAGGTGGGGGGACAAAGAGAATGAGAGGAAAATGAAACAGAGTGTAAACCAAAAATAAAATTCCAAGTCCGCCTACCATCGGAATGGACCCCTCCTCTCAGCCGAGGGCATTCCAAAGTCAACCTATG	+	chr1_236162895_236163143_E2F1_HUMAN.H11MO.0.A_center98	E2F1	GTGGCAGGAAG	98	EGR1	ACGCCCACGCA	218	221	237	474	440	398	2.93008	3.17073	-0.240648	1.43418	-1.73655	1.4959
chr1_236162895_236163143_E2F1_HUMAN.H11MO.0.A_center98_to_ETS1_HUMAN.H11MO.0.A	chr1_236162895_236163143	GATACATTGATGACTCAGACAAGCGTCTTCTTACTCATCTAGTTCGAGCTGCTAGGGAAGAAAGCATTCAAGACCTGATACTTATCTGAGGAGACCGGAAGTGTCTGGGGTGACTTTTCTCAAGGTGGGGGGACAAAGAGAATGAGAGGAAAATGAAACAGAGTGTAAACCAAAAATAAAATTCCAAGTCCGCCTACCATCGGAATGGACCCCTCCTCTCAGCCGAGGGCATTCCAAAGTCAACCTATG	+	chr1_236162895_236163143_E2F1_HUMAN.H11MO.0.A_center98	E2F1	TGGCAGGAA	98	ETS	ACCGGAAGT	206	216	172	414	402	319	2.92254	3.17073	-0.248184	1.43418	-1.73655	1.48836
chr1_236162895_236163143_E2F1_HUMAN.H11MO.0.A_center98_to_FOSL1_MA0477.1	chr1_236162895_236163143	GATACATTGATGACTCAGACAAGCGTCTTCTTACTCATCTAGTTCGAGCTGCTAGGGAAGAAAGCATTCAAGACCTGATACTTATCTGAGGAGGTGACTCATGTCTGGGGTGACTTTTCTCAAGGTGGGGGGACAAAGAGAATGAGAGGAAAATGAAACAGAGTGTAAACCAAAAATAAAATTCCAAGTCCGCCTACCATCGGAATGGACCCCTCCTCTCAGCCGAGGGCATTCCAAAGTCAACCTATG	+	chr1_236162895_236163143_E2F1_HUMAN.H11MO.0.A_center98	E2F1	TGGCAGGAA	98	AP-1	GTGACTCAT	135	117	134	500	474	429	3.8325	3.17073	0.661773	1.43418	-1.73655	2.39832
chr1_236162895_236163143_E2F1_HUMAN.H11MO.0.A_center98_to_MAFK_MA0496.2	chr1_236162895_236163143	GATACATTGATGACTCAGACAAGCGTCTTCTTACTCATCTAGTTCGAGCTGCTAGGGAAGAAAGCATTCAAGACCTGATACTTATCTGAGGTGCTGAGTCAGCACTGGGGTGACTTTTCTCAAGGTGGGGGGACAAAGAGAATGAGAGGAAAATGAAACAGAGTGTAAACCAAAAATAAAATTCCAAGTCCGCCTACCATCGGAATGGACCCCTCCTCTCAGCCGAGGGCATTCCAAAGTCAACCTATG	+	chr1_236162895_236163143_E2F1_HUMAN.H11MO.0.A_center98	E2F1	AGTGGCAGGAAGT	98	MAF	TGCTGAGTCAGCA	115	136	106	160	149	112	2.22967	3.17073	-0.941061	1.43418	-1.73655	0.795486
chr1_236162895_236163143_E2F1_HUMAN.H11MO.0.A_center98_to_MECP2_HUMAN.H11MO.0.C	chr1_236162895_236163143	GATACATTGATGACTCAGACAAGCGTCTTCTTACTCATCTAGTTCGAGCTGCTAGGGAAGAAAGCATTCAAGACCTGATACTTATCTGAGGAGTCCCGGAGAGTCTGGGGTGACTTTTCTCAAGGTGGGGGGACAAAGAGAATGAGAGGAAAATGAAACAGAGTGTAAACCAAAAATAAAATTCCAAGTCCGCCTACCATCGGAATGGACCCCTCCTCTCAGCCGAGGGCATTCCAAAGTCAACCTATG	+	chr1_236162895_236163143_E2F1_HUMAN.H11MO.0.A_center98	E2F1	GGCAGGA	98	MECP2	CCCGGAG	49	42	51	28	28	29	1.16169	3.17073	-2.00903	1.43418	-1.73655	-0.272486
chr1_236162895_236163143_E2F1_HUMAN.H11MO.0.A_center98_to_TP53_MA0106.3	chr1_236162895_236163143	GATACATTGATGACTCAGACAAGCGTCTTCTTACTCATCTAGTTCGAGCTGCTAGGGAAGAAAGCATTCAAGACCTGATACTTATCTGAGACATGCCCGGGCATGTGGGGTGACTTTTCTCAAGGTGGGGGGACAAAGAGAATGAGAGGAAAATGAAACAGAGTGTAAACCAAAAATAAAATTCCAAGTCCGCCTACCATCGGAATGGACCCCTCCTCTCAGCCGAGGGCATTCCAAAGTCAACCTATG	+	chr1_236162895_236163143_E2F1_HUMAN.H11MO.0.A_center98	E2F1	GAGTGGCAGGAAGTCT	98	P53	ACATGCCCGGGCATGT	59	68	49	260	232	364	4.16287	3.17073	0.992143	1.43418	-1.73655	2.72869
chr1_236162895_236163143_ETS1_HUMAN.H11MO.0.A_center100_to_CREB1_MA0018.3	chr1_236162895_236163143	GATACATTGATGACTCAGACAAGCGTCTTCTTACTCATCTAGTTCGAGCTGCTAGGGAAGAAAGCATTCAAGACCTGATACTTATCTGAGGAGTGGTGACGTCACTGGGGTGACTTTTCTCAAGGTGGGGGGACAAAGAGAATGAGAGGAAAATGAAACAGAGTGTAAACCAAAAATAAAATTCCAAGTCCGCCTACCATCGGAATGGACCCCTCCTCTCAGCCGAGGGCATTCCAAAGTCAACCTATG	+	chr1_236162895_236163143_ETS1_HUMAN.H11MO.0.A_center100	ETS	CAGGAAGT	100	CREB1	TGACGTCA	51	60	49	148	153	125	3.38926	3.17073	0.218531	1.83141	-1.33931	1.55785
chr1_236162895_236163143_ETS1_HUMAN.H11MO.0.A_center100_to_EGR1_C2H2_1	chr1_236162895_236163143	GATACATTGATGACTCAGACAAGCGTCTTCTTACTCATCTAGTTCGAGCTGCTAGGGAAGAAAGCATTCAAGACCTGATACTTATCTGAGGAGTACGCCCACGCATGGGGTGACTTTTCTCAAGGTGGGGGGACAAAGAGAATGAGAGGAAAATGAAACAGAGTGTAAACCAAAAATAAAATTCCAAGTCCGCCTACCATCGGAATGGACCCCTCCTCTCAGCCGAGGGCATTCCAAAGTCAACCTATG	+	chr1_236162895_236163143_ETS1_HUMAN.H11MO.0.A_center100	ETS	GGCAGGAAGTC	100	EGR1	ACGCCCACGCA	27	19	28	100	80	63	3.69613	3.17073	0.525401	1.83141	-1.33931	1.86471
chr1_236162895_236163143_ETS1_HUMAN.H11MO.0.A_center100_to_FOSL1_MA0477.1	chr1_236162895_236163143	GATACATTGATGACTCAGACAAGCGTCTTCTTACTCATCTAGTTCGAGCTGCTAGGGAAGAAAGCATTCAAGACCTGATACTTATCTGAGGAGTGGTGACTCATCTGGGGTGACTTTTCTCAAGGTGGGGGGACAAAGAGAATGAGAGGAAAATGAAACAGAGTGTAAACCAAAAATAAAATTCCAAGTCCGCCTACCATCGGAATGGACCCCTCCTCTCAGCCGAGGGCATTCCAAAGTCAACCTATG	+	chr1_236162895_236163143_ETS1_HUMAN.H11MO.0.A_center100	ETS	GCAGGAAGT	100	AP-1	GTGACTCAT	106	79	76	459	411	400	4.23994	3.17073	1.06921	1.83141	-1.33931	2.40852
chr1_236162895_236163143_ETS1_HUMAN.H11MO.0.A_center100_to_MAFK_MA0496.2	chr1_236162895_236163143	GATACATTGATGACTCAGACAAGCGTCTTCTTACTCATCTAGTTCGAGCTGCTAGGGAAGAAAGCATTCAAGACCTGATACTTATCTGAGGAGTGCTGAGTCAGCAGGGGTGACTTTTCTCAAGGTGGGGGGACAAAGAGAATGAGAGGAAAATGAAACAGAGTGTAAACCAAAAATAAAATTCCAAGTCCGCCTACCATCGGAATGGACCCCTCCTCTCAGCCGAGGGCATTCCAAAGTCAACCTATG	+	chr1_236162895_236163143_ETS1_HUMAN.H11MO.0.A_center100	ETS	TGGCAGGAAGTCT	100	MAF	TGCTGAGTCAGCA	200	212	231	317	275	215	2.32358	3.17073	-0.847148	1.83141	-1.33931	0.492166
chr1_236162895_236163143_ETS1_HUMAN.H11MO.0.A_center100_to_MECP2_HUMAN.H11MO.0.C	chr1_236162895_236163143	GATACATTGATGACTCAGACAAGCGTCTTCTTACTCATCTAGTTCGAGCTGCTAGGGAAGAAAGCATTCAAGACCTGATACTTATCTGAGGAGTGGCCCGGAGTCTGGGGTGACTTTTCTCAAGGTGGGGGGACAAAGAGAATGAGAGGAAAATGAAACAGAGTGTAAACCAAAAATAAAATTCCAAGTCCGCCTACCATCGGAATGGACCCCTCCTCTCAGCCGAGGGCATTCCAAAGTCAACCTATG	+	chr1_236162895_236163143_ETS1_HUMAN.H11MO.0.A_center100	ETS	CAGGAAG	100	MECP2	CCCGGAG	248	265	254	218	197	210	1.6488	3.17073	-1.52193	1.83141	-1.33931	-0.182613
chr1_236162895_236163143_ETS1_HUMAN.H11MO.0.A_center100_to_TP53_MA0106.3	chr1_236162895_236163143	GATACATTGATGACTCAGACAAGCGTCTTCTTACTCATCTAGTTCGAGCTGCTAGGGAAGAAAGCATTCAAGACCTGATACTTATCTGAGGAACATGCCCGGGCATGTGGTGACTTTTCTCAAGGTGGGGGGACAAAGAGAATGAGAGGAAAATGAAACAGAGTGTAAACCAAAAATAAAATTCCAAGTCCGCCTACCATCGGAATGGACCCCTCCTCTCAGCCGAGGGCATTCCAAAGTCAACCTATG	+	chr1_236162895_236163143_ETS1_HUMAN.H11MO.0.A_center100	ETS	GTGGCAGGAAGTCTGG	100	P53	ACATGCCCGGGCATGT	132	144	122	531	477	652	3.96686	3.17073	0.796135	1.83141	-1.33931	2.13545
chr1_236162895_236163143_MAFK_MA0496.2_center14_to_CREB1_MA0018.3	chr1_236162895_236163143	GATACATTGATGACGTCAACAAGCGTCTTCTTACTCATCTAGTTCGAGCTGCTAGGGAAGAAAGCATTCAAGACCTGATACTTATCTGAGGAGTGGCAGGAAGTCTGGGGTGACTTTTCTCAAGGTGGGGGGACAAAGAGAATGAGAGGAAAATGAAACAGAGTGTAAACCAAAAATAAAATTCCAAGTCCGCCTACCATCGGAATGGACCCCTCCTCTCAGCCGAGGGCATTCCAAAGTCAACCTATG	+	chr1_236162895_236163143_MAFK_MA0496.2_center14	MAF	TGACTCAG	14	CREB1	TGACGTCA	75	96	88	112	121	78	2.27052	3.17073	-0.90021	0.437909	-2.73282	1.83261
chr1_236162895_236163143_MAFK_MA0496.2_center14_to_E2F1_HUMAN.H11MO.0.A	chr1_236162895_236163143	GATACATTGAGGCGGGAAACAAGCGTCTTCTTACTCATCTAGTTCGAGCTGCTAGGGAAGAAAGCATTCAAGACCTGATACTTATCTGAGGAGTGGCAGGAAGTCTGGGGTGACTTTTCTCAAGGTGGGGGGACAAAGAGAATGAGAGGAAAATGAAACAGAGTGTAAACCAAAAATAAAATTCCAAGTCCGCCTACCATCGGAATGGACCCCTCCTCTCAGCCGAGGGCATTCCAAAGTCAACCTATG	+	chr1_236162895_236163143_MAFK_MA0496.2_center14	MAF	TGACTCAG	14	E2F1	GGCGGGAA	134	178	166	69	59	91	0.756865	3.17073	-2.41386	0.437909	-2.73282	0.318956
chr1_236162895_236163143_MAFK_MA0496.2_center14_to_EGR1_C2H2_1	chr1_236162895_236163143	GATACATTACGCCCACGCACAAGCGTCTTCTTACTCATCTAGTTCGAGCTGCTAGGGAAGAAAGCATTCAAGACCTGATACTTATCTGAGGAGTGGCAGGAAGTCTGGGGTGACTTTTCTCAAGGTGGGGGGACAAAGAGAATGAGAGGAAAATGAAACAGAGTGTAAACCAAAAATAAAATTCCAAGTCCGCCTACCATCGGAATGGACCCCTCCTCTCAGCCGAGGGCATTCCAAAGTCAACCTATG	+	chr1_236162895_236163143_MAFK_MA0496.2_center14	MAF	GATGACTCAGA	14	EGR1	ACGCCCACGCA	70	57	64	80	62	75	2.10139	3.17073	-1.06934	0.437909	-2.73282	1.66348
chr1_236162895_236163143_MAFK_MA0496.2_center14_to_ETS1_HUMAN.H11MO.0.A	chr1_236162895_236163143	GATACATTGACCGGAAGTACAAGCGTCTTCTTACTCATCTAGTTCGAGCTGCTAGGGAAGAAAGCATTCAAGACCTGATACTTATCTGAGGAGTGGCAGGAAGTCTGGGGTGACTTTTCTCAAGGTGGGGGGACAAAGAGAATGAGAGGAAAATGAAACAGAGTGTAAACCAAAAATAAAATTCCAAGTCCGCCTACCATCGGAATGGACCCCTCCTCTCAGCCGAGGGCATTCCAAAGTCAACCTATG	+	chr1_236162895_236163143_MAFK_MA0496.2_center14	MAF	ATGACTCAG	14	ETS	ACCGGAAGT	135	141	124	133	108	151	1.87212	3.17073	-1.29861	0.437909	-2.73282	1.43421
chr1_236162895_236163143_MAFK_MA0496.2_center14_to_FOSL1_MA0477.1	chr1_236162895_236163143	GATACATTGGTGACTCATACAAGCGTCTTCTTACTCATCTAGTTCGAGCTGCTAGGGAAGAAAGCATTCAAGACCTGATACTTATCTGAGGAGTGGCAGGAAGTCTGGGGTGACTTTTCTCAAGGTGGGGGGACAAAGAGAATGAGAGGAAAATGAAACAGAGTGTAAACCAAAAATAAAATTCCAAGTCCGCCTACCATCGGAATGGACCCCTCCTCTCAGCCGAGGGCATTCCAAAGTCAACCTATG	+	chr1_236162895_236163143_MAFK_MA0496.2_center14	MAF	ATGACTCAG	14	AP-1	GTGACTCAT	135	129	161	385	330	253	3.18723	3.17073	0.0164979	0.437909	-2.73282	2.74932
chr1_236162895_236163143_MAFK_MA0496.2_center14_to_MECP2_HUMAN.H11MO.0.C	chr1_236162895_236163143	GATACATTGACCCGGAGGACAAGCGTCTTCTTACTCATCTAGTTCGAGCTGCTAGGGAAGAAAGCATTCAAGACCTGATACTTATCTGAGGAGTGGCAGGAAGTCTGGGGTGACTTTTCTCAAGGTGGGGGGACAAAGAGAATGAGAGGAAAATGAAACAGAGTGTAAACCAAAAATAAAATTCCAAGTCCGCCTACCATCGGAATGGACCCCTCCTCTCAGCCGAGGGCATTCCAAAGTCAACCTATG	+	chr1_236162895_236163143_MAFK_MA0496.2_center14	MAF	TGACTCA	14	MECP2	CCCGGAG	243	222	235	99	93	162	0.873018	3.17073	-2.29771	0.437909	-2.73282	0.43511
chr1_236162895_236163143_MAFK_MA0496.2_center14_to_TP53_MA0106.3	chr1_236162895_236163143	GATACAACATGCCCGGGCATGTGCGTCTTCTTACTCATCTAGTTCGAGCTGCTAGGGAAGAAAGCATTCAAGACCTGATACTTATCTGAGGAGTGGCAGGAAGTCTGGGGTGACTTTTCTCAAGGTGGGGGGACAAAGAGAATGAGAGGAAAATGAAACAGAGTGTAAACCAAAAATAAAATTCCAAGTCCGCCTACCATCGGAATGGACCCCTCCTCTCAGCCGAGGGCATTCCAAAGTCAACCTATG	+	chr1_236162895_236163143_MAFK_MA0496.2_center14	MAF	TTGATGACTCAGACAA	14	P53	ACATGCCCGGGCATGT	214	253	247	1034	927	1215	4.07108	3.17073	0.900348	0.437909	-2.73282	3.63317
chr1_244623601_244623849_CREB1_MA0018.3_center159_to_E2F1_HUMAN.H11MO.0.A	chr1_244623601_244623849	CCTAAACCGCTCCTAAGATCGGTGCTCGAGAGATTTTACAGACCCTGCACTTGATGGATCAGCTGGCACCACCCAGATCAGTAAACTGGCTCATCTGATCTTGTGGCCCCACCCAGGAAGTGACTCAGCACAGGAAGACAGCTTCTACTCCCTATGGCGGGAACCCTGACCAATCAGCACTCCTGGCTCACTGGCTTCCGCCAACCCACCAAGTTATCCTTAAAAACTGTGCTCCCCAATTGCTTGGGG	+	chr1_244623601_244623849_CREB1_MA0018.3_center159	CREB1	GATTTCAC	159	E2F1	GGCGGGAA	483	502	468	599	564	721	2.29053	4.19874	-1.90822	2.72548	-1.47326	-0.434956
chr1_244623601_244623849_CREB1_MA0018.3_center159_to_EGR1_C2H2_1	chr1_244623601_244623849	CCTAAACCGCTCCTAAGATCGGTGCTCGAGAGATTTTACAGACCCTGCACTTGATGGATCAGCTGGCACCACCCAGATCAGTAAACTGGCTCATCTGATCTTGTGGCCCCACCCAGGAAGTGACTCAGCACAGGAAGACAGCTTCTACTCCCTACGCCCACGCACCTGACCAATCAGCACTCCTGGCTCACTGGCTTCCGCCAACCCACCAAGTTATCCTTAAAAACTGTGCTCCCCAATTGCTTGGGG	+	chr1_244623601_244623849_CREB1_MA0018.3_center159	CREB1	ATGATTTCACC	159	EGR1	ACGCCCACGCA	185	188	206	1572	1298	965	4.73604	4.19874	0.537294	2.72548	-1.47326	2.01055
chr1_244623601_244623849_CREB1_MA0018.3_center159_to_ETS1_HUMAN.H11MO.0.A	chr1_244623601_244623849	CCTAAACCGCTCCTAAGATCGGTGCTCGAGAGATTTTACAGACCCTGCACTTGATGGATCAGCTGGCACCACCCAGATCAGTAAACTGGCTCATCTGATCTTGTGGCCCCACCCAGGAAGTGACTCAGCACAGGAAGACAGCTTCTACTCCCTAACCGGAAGTCCCTGACCAATCAGCACTCCTGGCTCACTGGCTTCCGCCAACCCACCAAGTTATCCTTAAAAACTGTGCTCCCCAATTGCTTGGGG	+	chr1_244623601_244623849_CREB1_MA0018.3_center159	CREB1	TGATTTCAC	159	ETS	ACCGGAAGT	154	152	142	584	480	378	3.68305	4.19874	-0.515694	2.72548	-1.47326	0.957566
chr1_244623601_244623849_CREB1_MA0018.3_center159_to_FOSL1_MA0477.1	chr1_244623601_244623849	CCTAAACCGCTCCTAAGATCGGTGCTCGAGAGATTTTACAGACCCTGCACTTGATGGATCAGCTGGCACCACCCAGATCAGTAAACTGGCTCATCTGATCTTGTGGCCCCACCCAGGAAGTGACTCAGCACAGGAAGACAGCTTCTACTCCCTAGTGACTCATCCCTGACCAATCAGCACTCCTGGCTCACTGGCTTCCGCCAACCCACCAAGTTATCCTTAAAAACTGTGCTCCCCAATTGCTTGGGG	+	chr1_244623601_244623849_CREB1_MA0018.3_center159	CREB1	TGATTTCAC	159	AP-1	GTGACTCAT	183	201	196	2050	1782	1458	5.18326	4.19874	0.984519	2.72548	-1.47326	2.45778
chr1_244623601_244623849_CREB1_MA0018.3_center159_to_MAFK_MA0496.2	chr1_244623601_244623849	CCTAAACCGCTCCTAAGATCGGTGCTCGAGAGATTTTACAGACCCTGCACTTGATGGATCAGCTGGCACCACCCAGATCAGTAAACTGGCTCATCTGATCTTGTGGCCCCACCCAGGAAGTGACTCAGCACAGGAAGACAGCTTCTACTCCCTGCTGAGTCAGCACTGACCAATCAGCACTCCTGGCTCACTGGCTTCCGCCAACCCACCAAGTTATCCTTAAAAACTGTGCTCCCCAATTGCTTGGGG	+	chr1_244623601_244623849_CREB1_MA0018.3_center159	CREB1	TATGATTTCACCC	159	MAF	TGCTGAGTCAGCA	209	222	229	1435	1276	883	4.46088	4.19874	0.262137	2.72548	-1.47326	1.7354
chr1_244623601_244623849_CREB1_MA0018.3_center159_to_MECP2_HUMAN.H11MO.0.C	chr1_244623601_244623849	CCTAAACCGCTCCTAAGATCGGTGCTCGAGAGATTTTACAGACCCTGCACTTGATGGATCAGCTGGCACCACCCAGATCAGTAAACTGGCTCATCTGATCTTGTGGCCCCACCCAGGAAGTGACTCAGCACAGGAAGACAGCTTCTACTCCCTATCCCGGAGCCCCTGACCAATCAGCACTCCTGGCTCACTGGCTTCCGCCAACCCACCAAGTTATCCTTAAAAACTGTGCTCCCCAATTGCTTGGGG	+	chr1_244623601_244623849_CREB1_MA0018.3_center159	CREB1	GATTTCA	159	MECP2	CCCGGAG	377	423	390	900	796	694	2.98898	4.19874	-1.20976	2.72548	-1.47326	0.263496
chr1_244623601_244623849_CREB1_MA0018.3_center159_to_TP53_MA0106.3	chr1_244623601_244623849	CCTAAACCGCTCCTAAGATCGGTGCTCGAGAGATTTTACAGACCCTGCACTTGATGGATCAGCTGGCACCACCCAGATCAGTAAACTGGCTCATCTGATCTTGTGGCCCCACCCAGGAAGTGACTCAGCACAGGAAGACAGCTTCTACTCCACATGCCCGGGCATGTGACCAATCAGCACTCCTGGCTCACTGGCTTCCGCCAACCCACCAAGTTATCCTTAAAAACTGTGCTCCCCAATTGCTTGGGG	+	chr1_244623601_244623849_CREB1_MA0018.3_center159	CREB1	CTATGATTTCACCCCT	159	P53	ACATGCCCGGGCATGT	280	268	283	1708	1466	1491	4.44895	4.19874	0.250211	2.72548	-1.47326	1.72347
chr1_244623601_244623849_ETS1_HUMAN.H11MO.0.A_center117_to_CREB1_MA0018.3	chr1_244623601_244623849	CCTAAACCGCTCCTAAGATCGGTGCTCGAGAGATTTTACAGACCCTGCACTTGATGGATCAGCTGGCACCACCCAGATCAGTAAACTGGCTCATCTGATCTTGTGGCCCCACCTGACGTCAGACTCAGCACAGGAAGACAGCTTCTACTCCCTATGATTTCACCCCTGACCAATCAGCACTCCTGGCTCACTGGCTTCCGCCAACCCACCAAGTTATCCTTAAAAACTGTGCTCCCCAATTGCTTGGGG	+	chr1_244623601_244623849_ETS1_HUMAN.H11MO.0.A_center117	ETS	CAGGAAGT	117	CREB1	TGACGTCA	340	358	352	157	158	164	0.808639	4.19874	-3.3901	2.20046	-1.99828	-1.39183
chr1_244623601_244623849_ETS1_HUMAN.H11MO.0.A_center117_to_E2F1_HUMAN.H11MO.0.A	chr1_244623601_244623849	CCTAAACCGCTCCTAAGATCGGTGCTCGAGAGATTTTACAGACCCTGCACTTGATGGATCAGCTGGCACCACCCAGATCAGTAAACTGGCTCATCTGATCTTGTGGCCCCACCGGCGGGAAGACTCAGCACAGGAAGACAGCTTCTACTCCCTATGATTTCACCCCTGACCAATCAGCACTCCTGGCTCACTGGCTTCCGCCAACCCACCAAGTTATCCTTAAAAACTGTGCTCCCCAATTGCTTGGGG	+	chr1_244623601_244623849_ETS1_HUMAN.H11MO.0.A_center117	ETS	CAGGAAGT	117	E2F1	GGCGGGAA	325	342	354	118	121	203	0.6527	4.19874	-3.54604	2.20046	-1.99828	-1.54776
chr1_244623601_244623849_ETS1_HUMAN.H11MO.0.A_center117_to_EGR1_C2H2_1	chr1_244623601_244623849	CCTAAACCGCTCCTAAGATCGGTGCTCGAGAGATTTTACAGACCCTGCACTTGATGGATCAGCTGGCACCACCCAGATCAGTAAACTGGCTCATCTGATCTTGTGGCCCCAACGCCCACGCAACTCAGCACAGGAAGACAGCTTCTACTCCCTATGATTTCACCCCTGACCAATCAGCACTCCTGGCTCACTGGCTTCCGCCAACCCACCAAGTTATCCTTAAAAACTGTGCTCCCCAATTGCTTGGGG	+	chr1_244623601_244623849_ETS1_HUMAN.H11MO.0.A_center117	ETS	CCCAGGAAGTG	117	EGR1	ACGCCCACGCA	138	151	158	70	63	73	0.800332	4.19874	-3.39841	2.20046	-1.99828	-1.40013
chr1_244623601_244623849_ETS1_HUMAN.H11MO.0.A_center117_to_FOSL1_MA0477.1	chr1_244623601_244623849	CCTAAACCGCTCCTAAGATCGGTGCTCGAGAGATTTTACAGACCCTGCACTTGATGGATCAGCTGGCACCACCCAGATCAGTAAACTGGCTCATCTGATCTTGTGGCCCCACGTGACTCATGACTCAGCACAGGAAGACAGCTTCTACTCCCTATGATTTCACCCCTGACCAATCAGCACTCCTGGCTCACTGGCTTCCGCCAACCCACCAAGTTATCCTTAAAAACTGTGCTCCCCAATTGCTTGGGG	+	chr1_244623601_244623849_ETS1_HUMAN.H11MO.0.A_center117	ETS	CCAGGAAGT	117	AP-1	GTGACTCAT	565	550	548	596	504	566	1.94517	4.19874	-2.25358	2.20046	-1.99828	-0.255299
chr1_244623601_244623849_ETS1_HUMAN.H11MO.0.A_center117_to_MAFK_MA0496.2	chr1_244623601_244623849	CCTAAACCGCTCCTAAGATCGGTGCTCGAGAGATTTTACAGACCCTGCACTTGATGGATCAGCTGGCACCACCCAGATCAGTAAACTGGCTCATCTGATCTTGTGGCCCCTGCTGAGTCAGCACTCAGCACAGGAAGACAGCTTCTACTCCCTATGATTTCACCCCTGACCAATCAGCACTCCTGGCTCACTGGCTTCCGCCAACCCACCAAGTTATCCTTAAAAACTGTGCTCCCCAATTGCTTGGGG	+	chr1_244623601_244623849_ETS1_HUMAN.H11MO.0.A_center117	ETS	ACCCAGGAAGTGA	117	MAF	TGCTGAGTCAGCA	622	673	624	255	262	369	0.777356	4.19874	-3.42139	2.20046	-1.99828	-1.42311
chr1_244623601_244623849_ETS1_HUMAN.H11MO.0.A_center117_to_MECP2_HUMAN.H11MO.0.C	chr1_244623601_244623849	CCTAAACCGCTCCTAAGATCGGTGCTCGAGAGATTTTACAGACCCTGCACTTGATGGATCAGCTGGCACCACCCAGATCAGTAAACTGGCTCATCTGATCTTGTGGCCCCACCCCCGGAGTGACTCAGCACAGGAAGACAGCTTCTACTCCCTATGATTTCACCCCTGACCAATCAGCACTCCTGGCTCACTGGCTTCCGCCAACCCACCAAGTTATCCTTAAAAACTGTGCTCCCCAATTGCTTGGGG	+	chr1_244623601_244623849_ETS1_HUMAN.H11MO.0.A_center117	ETS	CAGGAAG	117	MECP2	CCCGGAG	311	331	320	411	435	400	2.3384	4.19874	-1.86035	2.20046	-1.99828	0.137932
chr1_244623601_244623849_ETS1_HUMAN.H11MO.0.A_center117_to_TP53_MA0106.3	chr1_244623601_244623849	CCTAAACCGCTCCTAAGATCGGTGCTCGAGAGATTTTACAGACCCTGCACTTGATGGATCAGCTGGCACCACCCAGATCAGTAAACTGGCTCATCTGATCTTGTGGCCCACATGCCCGGGCATGTCAGCACAGGAAGACAGCTTCTACTCCCTATGATTTCACCCCTGACCAATCAGCACTCCTGGCTCACTGGCTTCCGCCAACCCACCAAGTTATCCTTAAAAACTGTGCTCCCCAATTGCTTGGGG	+	chr1_244623601_244623849_ETS1_HUMAN.H11MO.0.A_center117	ETS	CACCCAGGAAGTGACT	117	P53	ACATGCCCGGGCATGT	247	317	298	1481	1268	1934	4.3365	4.19874	0.13776	2.20046	-1.99828	2.13604
chr1_244623601_244623849_FOSL1_MA0477.1_center124_to_CREB1_MA0018.3	chr1_244623601_244623849	CCTAAACCGCTCCTAAGATCGGTGCTCGAGAGATTTTACAGACCCTGCACTTGATGGATCAGCTGGCACCACCCAGATCAGTAAACTGGCTCATCTGATCTTGTGGCCCCACCCAGGAAGTGACGTCACACAGGAAGACAGCTTCTACTCCCTATGATTTCACCCCTGACCAATCAGCACTCCTGGCTCACTGGCTTCCGCCAACCCACCAAGTTATCCTTAAAAACTGTGCTCCCCAATTGCTTGGGG	+	chr1_244623601_244623849_FOSL1_MA0477.1_center124	AP-1	TGACTCAG	124	CREB1	TGACGTCA	119	141	137	208	191	175	2.50039	4.19874	-1.69836	0.808052	-3.39069	1.69233
chr1_244623601_244623849_FOSL1_MA0477.1_center124_to_E2F1_HUMAN.H11MO.0.A	chr1_244623601_244623849	CCTAAACCGCTCCTAAGATCGGTGCTCGAGAGATTTTACAGACCCTGCACTTGATGGATCAGCTGGCACCACCCAGATCAGTAAACTGGCTCATCTGATCTTGTGGCCCCACCCAGGAAGGGCGGGAACACAGGAAGACAGCTTCTACTCCCTATGATTTCACCCCTGACCAATCAGCACTCCTGGCTCACTGGCTTCCGCCAACCCACCAAGTTATCCTTAAAAACTGTGCTCCCCAATTGCTTGGGG	+	chr1_244623601_244623849_FOSL1_MA0477.1_center124	AP-1	TGACTCAG	124	E2F1	GGCGGGAA	163	192	183	61	72	104	0.692853	4.19874	-3.50589	0.808052	-3.39069	-0.1152
chr1_244623601_244623849_FOSL1_MA0477.1_center124_to_EGR1_C2H2_1	chr1_244623601_244623849	CCTAAACCGCTCCTAAGATCGGTGCTCGAGAGATTTTACAGACCCTGCACTTGATGGATCAGCTGGCACCACCCAGATCAGTAAACTGGCTCATCTGATCTTGTGGCCCCACCCAGGAACGCCCACGCAACAGGAAGACAGCTTCTACTCCCTATGATTTCACCCCTGACCAATCAGCACTCCTGGCTCACTGGCTTCCGCCAACCCACCAAGTTATCCTTAAAAACTGTGCTCCCCAATTGCTTGGGG	+	chr1_244623601_244623849_FOSL1_MA0477.1_center124	AP-1	AGTGACTCAGC	124	EGR1	ACGCCCACGCA	361	375	342	343	354	328	1.89026	4.19874	-2.30848	0.808052	-3.39069	1.08221
chr1_244623601_244623849_FOSL1_MA0477.1_center124_to_ETS1_HUMAN.H11MO.0.A	chr1_244623601_244623849	CCTAAACCGCTCCTAAGATCGGTGCTCGAGAGATTTTACAGACCCTGCACTTGATGGATCAGCTGGCACCACCCAGATCAGTAAACTGGCTCATCTGATCTTGTGGCCCCACCCAGGAAACCGGAAGTCACAGGAAGACAGCTTCTACTCCCTATGATTTCACCCCTGACCAATCAGCACTCCTGGCTCACTGGCTTCCGCCAACCCACCAAGTTATCCTTAAAAACTGTGCTCCCCAATTGCTTGGGG	+	chr1_244623601_244623849_FOSL1_MA0477.1_center124	AP-1	GTGACTCAG	124	ETS	ACCGGAAGT	149	162	155	137	137	149	1.79294	4.19874	-2.40581	0.808052	-3.39069	0.984885
chr1_244623601_244623849_FOSL1_MA0477.1_center124_to_MECP2_HUMAN.H11MO.0.C	chr1_244623601_244623849	CCTAAACCGCTCCTAAGATCGGTGCTCGAGAGATTTTACAGACCCTGCACTTGATGGATCAGCTGGCACCACCCAGATCAGTAAACTGGCTCATCTGATCTTGTGGCCCCACCCAGGAAGCCCGGAGGCACAGGAAGACAGCTTCTACTCCCTATGATTTCACCCCTGACCAATCAGCACTCCTGGCTCACTGGCTTCCGCCAACCCACCAAGTTATCCTTAAAAACTGTGCTCCCCAATTGCTTGGGG	+	chr1_244623601_244623849_FOSL1_MA0477.1_center124	AP-1	TGACTCA	124	MECP2	CCCGGAG	249	288	275	156	119	190	1.08312	4.19874	-3.11562	0.808052	-3.39069	0.275072
chr1_244623601_244623849_FOSL1_MA0477.1_center124_to_TP53_MA0106.3	chr1_244623601_244623849	CCTAAACCGCTCCTAAGATCGGTGCTCGAGAGATTTTACAGACCCTGCACTTGATGGATCAGCTGGCACCACCCAGATCAGTAAACTGGCTCATCTGATCTTGTGGCCCCACCCAGACATGCCCGGGCATGTGGAAGACAGCTTCTACTCCCTATGATTTCACCCCTGACCAATCAGCACTCCTGGCTCACTGGCTTCCGCCAACCCACCAAGTTATCCTTAAAAACTGTGCTCCCCAATTGCTTGGGG	+	chr1_244623601_244623849_FOSL1_MA0477.1_center124	AP-1	GAAGTGACTCAGCACA	124	P53	ACATGCCCGGGCATGT	526	561	575	2242	1820	2518	3.89861	4.19874	-0.30013	0.808052	-3.39069	3.09056
chr1_244898810_244899058_TP53_MA0106.3_center133_to_E2F1_HUMAN.H11MO.0.A	chr1_244898810_244899058	TGCCAATTTCTGGTAGCTTCGCCCCATCCTCATAATGTGAATGTGGGCCCTTAGCTTGAGTTCATCCATATTGCTTTGTTCCCCTTACTGCACATGTGTCAGGGGATGGAAATTTCCATTGCGGGCATGGGCGGGAAAGTCACCCGTGTAGGCTTTCTTGTCTGTGCAGCTGTGGGCATGTCTTAGACAAGCCCCGCTGTGCAAGTTCCCTTATCTGTGCCTTCAGGCTGTTCTTTGAAAGGATTCAAC	-	chr1_244898810_244899058_TP53_MA0106.3_center133	P53	TCTGGGCA	133	E2F1	GGCGGGAA	368	449	398	672	553	999	2.73648	4.42875	-1.69226	2.24634	-2.18241	0.49014
chr1_244898810_244899058_TP53_MA0106.3_center133_to_EGR1_C2H2_1	chr1_244898810_244899058	TGCCAATTTCTGGTAGCTTCGCCCCATCCTCATAATGTGAATGTGGGCCCTTAGCTTGAGTTCATCCATATTGCTTTGTTCCCCTTACTGCACATGTGTCAGGGGATGGAAATTTCCATTGCGGGCAACGCCCACGCAGTCACCCGTGTAGGCTTTCTTGTCTGTGCAGCTGTGGGCATGTCTTAGACAAGCCCCGCTGTGCAAGTTCCCTTATCTGTGCCTTCAGGCTGTTCTTTGAAAGGATTCAAC	-	chr1_244898810_244899058_TP53_MA0106.3_center133	P53	TGTCTGGGCAA	133	EGR1	ACGCCCACGCA	613	579	603	1528	1313	2065	3.33489	4.42875	-1.09386	2.24634	-2.18241	1.08855
chr1_244898810_244899058_TP53_MA0106.3_center133_to_ETS1_HUMAN.H11MO.0.A	chr1_244898810_244899058	TGCCAATTTCTGGTAGCTTCGCCCCATCCTCATAATGTGAATGTGGGCCCTTAGCTTGAGTTCATCCATATTGCTTTGTTCCCCTTACTGCACATGTGTCAGGGGATGGAAATTTCCATTGCGGGCATACCGGAAGTAGTCACCCGTGTAGGCTTTCTTGTCTGTGCAGCTGTGGGCATGTCTTAGACAAGCCCCGCTGTGCAAGTTCCCTTATCTGTGCCTTCAGGCTGTTCTTTGAAAGGATTCAAC	-	chr1_244898810_244899058_TP53_MA0106.3_center133	P53	GTCTGGGCA	133	ETS	ACCGGAAGT	523	577	578	1990	1597	2603	3.76815	4.42875	-0.660599	2.24634	-2.18241	1.52181
chr1_244898810_244899058_TP53_MA0106.3_center133_to_FOSL1_MA0477.1	chr1_244898810_244899058	TGCCAATTTCTGGTAGCTTCGCCCCATCCTCATAATGTGAATGTGGGCCCTTAGCTTGAGTTCATCCATATTGCTTTGTTCCCCTTACTGCACATGTGTCAGGGGATGGAAATTTCCATTGCGGGCATGTGACTCATAGTCACCCGTGTAGGCTTTCTTGTCTGTGCAGCTGTGGGCATGTCTTAGACAAGCCCCGCTGTGCAAGTTCCCTTATCTGTGCCTTCAGGCTGTTCTTTGAAAGGATTCAAC	-	chr1_244898810_244899058_TP53_MA0106.3_center133	P53	GTCTGGGCA	133	AP-1	GTGACTCAT	665	703	688	2242	1867	3057	3.68193	4.42875	-0.746821	2.24634	-2.18241	1.43558
chr1_244898810_244899058_TP53_MA0106.3_center133_to_MAFK_MA0496.2	chr1_244898810_244899058	TGCCAATTTCTGGTAGCTTCGCCCCATCCTCATAATGTGAATGTGGGCCCTTAGCTTGAGTTCATCCATATTGCTTTGTTCCCCTTACTGCACATGTGTCAGGGGATGGAAATTTCCATTGCGGGCTGCTGAGTCAGCATCACCCGTGTAGGCTTTCTTGTCTGTGCAGCTGTGGGCATGTCTTAGACAAGCCCCGCTGTGCAAGTTCCCTTATCTGTGCCTTCAGGCTGTTCTTTGAAAGGATTCAAC	-	chr1_244898810_244899058_TP53_MA0106.3_center133	P53	ATGTCTGGGCAAG	133	MAF	TGCTGAGTCAGCA	546	568	566	1416	1174	1910	3.30324	4.42875	-1.12551	2.24634	-2.18241	1.05689
chr1_246798064_246798312_CREB1_MA0018.3_center76_to_E2F1_HUMAN.H11MO.0.A	chr1_246798064_246798312	CAGCACAAGGCGGTGTGGAGCATCACGCTGTTTTAATGAGCACCTGGGTGCAGACGGGCTGAGGCCTAAAATGGCGGGAACGCCACGTGAGGACGGGGCAGGGGTTTTACAGTCTCCTGTAAACAGGAAGTGTCCCTGTCTGATGTAACGGCTACGTGGTACCTGGATGGCCTCTCTGTCTATCCTCGGTGGTGCGTGTCTTCCGGCCGGGGTGCGTGTCTTCCGGCCGGCCCTCTTCCTGCTTCTGCT	+	chr1_246798064_246798312_CREB1_MA0018.3_center76	CREB1	GGCGTCAG	76	E2F1	GGCGGGAA	925	947	985	688	605	956	1.53769	2.76042	-1.22273	1.63159	-1.12883	-0.0938989
chr1_246798064_246798312_CREB1_MA0018.3_center76_to_EGR1_C2H2_1	chr1_246798064_246798312	CAGCACAAGGCGGTGTGGAGCATCACGCTGTTTTAATGAGCACCTGGGTGCAGACGGGCTGAGGCCTAAAACGCCCACGCAGCCACGTGAGGACGGGGCAGGGGTTTTACAGTCTCCTGTAAACAGGAAGTGTCCCTGTCTGATGTAACGGCTACGTGGTACCTGGATGGCCTCTCTGTCTATCCTCGGTGGTGCGTGTCTTCCGGCCGGGGTGCGTGTCTTCCGGCCGGCCCTCTTCCTGCTTCTGCT	+	chr1_246798064_246798312_CREB1_MA0018.3_center76	CREB1	ATGGCGTCAGC	76	EGR1	ACGCCCACGCA	466	490	537	347	354	437	1.52645	2.76042	-1.23397	1.63159	-1.12883	-0.105141
chr1_246798064_246798312_CREB1_MA0018.3_center76_to_ETS1_HUMAN.H11MO.0.A	chr1_246798064_246798312	CAGCACAAGGCGGTGTGGAGCATCACGCTGTTTTAATGAGCACCTGGGTGCAGACGGGCTGAGGCCTAAAAACCGGAAGTCGCCACGTGAGGACGGGGCAGGGGTTTTACAGTCTCCTGTAAACAGGAAGTGTCCCTGTCTGATGTAACGGCTACGTGGTACCTGGATGGCCTCTCTGTCTATCCTCGGTGGTGCGTGTCTTCCGGCCGGGGTGCGTGTCTTCCGGCCGGCCCTCTTCCTGCTTCTGCT	+	chr1_246798064_246798312_CREB1_MA0018.3_center76	CREB1	TGGCGTCAG	76	ETS	ACCGGAAGT	1301	1312	1357	1387	1214	1743	2.03082	2.76042	-0.729597	1.63159	-1.12883	0.399232
chr1_246798064_246798312_CREB1_MA0018.3_center76_to_FOSL1_MA0477.1	chr1_246798064_246798312	CAGCACAAGGCGGTGTGGAGCATCACGCTGTTTTAATGAGCACCTGGGTGCAGACGGGCTGAGGCCTAAAAGTGACTCATCGCCACGTGAGGACGGGGCAGGGGTTTTACAGTCTCCTGTAAACAGGAAGTGTCCCTGTCTGATGTAACGGCTACGTGGTACCTGGATGGCCTCTCTGTCTATCCTCGGTGGTGCGTGTCTTCCGGCCGGGGTGCGTGTCTTCCGGCCGGCCCTCTTCCTGCTTCTGCT	+	chr1_246798064_246798312_CREB1_MA0018.3_center76	CREB1	TGGCGTCAG	76	AP-1	GTGACTCAT	984	972	1005	1239	1133	1317	2.25214	2.76042	-0.508273	1.63159	-1.12883	0.620556
chr1_246798064_246798312_CREB1_MA0018.3_center76_to_MAFK_MA0496.2	chr1_246798064_246798312	CAGCACAAGGCGGTGTGGAGCATCACGCTGTTTTAATGAGCACCTGGGTGCAGACGGGCTGAGGCCTAATGCTGAGTCAGCACCACGTGAGGACGGGGCAGGGGTTTTACAGTCTCCTGTAAACAGGAAGTGTCCCTGTCTGATGTAACGGCTACGTGGTACCTGGATGGCCTCTCTGTCTATCCTCGGTGGTGCGTGTCTTCCGGCCGGGGTGCGTGTCTTCCGGCCGGCCCTCTTCCTGCTTCTGCT	+	chr1_246798064_246798312_CREB1_MA0018.3_center76	CREB1	AATGGCGTCAGCG	76	MAF	TGCTGAGTCAGCA	1376	1430	1504	1454	1270	1773	1.9682	2.76042	-0.792213	1.63159	-1.12883	0.336616
chr1_246798064_246798312_CREB1_MA0018.3_center76_to_MECP2_HUMAN.H11MO.0.C	chr1_246798064_246798312	CAGCACAAGGCGGTGTGGAGCATCACGCTGTTTTAATGAGCACCTGGGTGCAGACGGGCTGAGGCCTAAAATCCCGGAGGCGCCACGTGAGGACGGGGCAGGGGTTTTACAGTCTCCTGTAAACAGGAAGTGTCCCTGTCTGATGTAACGGCTACGTGGTACCTGGATGGCCTCTCTGTCTATCCTCGGTGGTGCGTGTCTTCCGGCCGGGGTGCGTGTCTTCCGGCCGGCCCTCTTCCTGCTTCTGCT	+	chr1_246798064_246798312_CREB1_MA0018.3_center76	CREB1	GGCGTCA	76	MECP2	CCCGGAG	671	760	766	673	538	881	1.81355	2.76042	-0.946869	1.63159	-1.12883	0.18196
chr1_246798064_246798312_CREB1_MA0018.3_center76_to_TP53_MA0106.3	chr1_246798064_246798312	CAGCACAAGGCGGTGTGGAGCATCACGCTGTTTTAATGAGCACCTGGGTGCAGACGGGCTGAGGCCTAACATGCCCGGGCATGTACGTGAGGACGGGGCAGGGGTTTTACAGTCTCCTGTAAACAGGAAGTGTCCCTGTCTGATGTAACGGCTACGTGGTACCTGGATGGCCTCTCTGTCTATCCTCGGTGGTGCGTGTCTTCCGGCCGGGGTGCGTGTCTTCCGGCCGGCCCTCTTCCTGCTTCTGCT	+	chr1_246798064_246798312_CREB1_MA0018.3_center76	CREB1	AAATGGCGTCAGCGCC	76	P53	ACATGCCCGGGCATGT	708	776	712	2764	2227	2973	3.77821	2.76042	1.0178	1.63159	-1.12883	2.14663
chr1_249115368_249115616_FOSL1_MA0477.1_center28_to_CREB1_MA0018.3	chr1_249115368_249115616	CTGCAGCCTGAGTCCCCATGCCTTTGACGTCATGTCCTGGCATCCTGGGAATCTGACTGCTGTGCCCTGGGAAGGTCACCCTCCCTGCTGGCTGCTGGCTCACTGATGGATGATGCACGTTGATTCAGACTTTGTCCTCCCCAAATTCCGTTTCAGCTGAGTGCCAGGAGTCCCTGGTGAAGCAGGCCAAATGGAATGTGTTGCTGACTGCCCAAAACTGTCCCAGGTCCTCAGTGGATTCCTGCTCAG	-	chr1_249115368_249115616_FOSL1_MA0477.1_center28	AP-1	TGATTCAG	28	CREB1	TGACGTCA	501	480	482	426	419	460	1.77295	2.29358	-0.520635	-0.14218	-2.43576	1.91513
chr1_249115368_249115616_FOSL1_MA0477.1_center28_to_E2F1_HUMAN.H11MO.0.A	chr1_249115368_249115616	CTGCAGCCTGAGTCCCCATGCCTTGGCGGGAATGTCCTGGCATCCTGGGAATCTGACTGCTGTGCCCTGGGAAGGTCACCCTCCCTGCTGGCTGCTGGCTCACTGATGGATGATGCACGTTGATTCAGACTTTGTCCTCCCCAAATTCCGTTTCAGCTGAGTGCCAGGAGTCCCTGGTGAAGCAGGCCAAATGGAATGTGTTGCTGACTGCCCAAAACTGTCCCAGGTCCTCAGTGGATTCCTGCTCAG	-	chr1_249115368_249115616_FOSL1_MA0477.1_center28	AP-1	TGATTCAG	28	E2F1	GGCGGGAA	707	716	753	236	220	355	0.449772	2.29358	-1.84381	-0.14218	-2.43576	0.591952
chr1_249115368_249115616_FOSL1_MA0477.1_center28_to_EGR1_C2H2_1	chr1_249115368_249115616	CTGCAGCCTGAGTCCCCATGCCACGCCCACGCAGTCCTGGCATCCTGGGAATCTGACTGCTGTGCCCTGGGAAGGTCACCCTCCCTGCTGGCTGCTGGCTCACTGATGGATGATGCACGTTGATTCAGACTTTGTCCTCCCCAAATTCCGTTTCAGCTGAGTGCCAGGAGTCCCTGGTGAAGCAGGCCAAATGGAATGTGTTGCTGACTGCCCAAAACTGTCCCAGGTCCTCAGTGGATTCCTGCTCAG	-	chr1_249115368_249115616_FOSL1_MA0477.1_center28	AP-1	TTTGATTCAGT	28	EGR1	ACGCCCACGCA	356	358	378	355	276	244	1.66224	2.29358	-0.631345	-0.14218	-2.43576	1.80442
chr1_249115368_249115616_FOSL1_MA0477.1_center28_to_ETS1_HUMAN.H11MO.0.A	chr1_249115368_249115616	CTGCAGCCTGAGTCCCCATGCCTACCGGAAGTTGTCCTGGCATCCTGGGAATCTGACTGCTGTGCCCTGGGAAGGTCACCCTCCCTGCTGGCTGCTGGCTCACTGATGGATGATGCACGTTGATTCAGACTTTGTCCTCCCCAAATTCCGTTTCAGCTGAGTGCCAGGAGTCCCTGGTGAAGCAGGCCAAATGGAATGTGTTGCTGACTGCCCAAAACTGTCCCAGGTCCTCAGTGGATTCCTGCTCAG	-	chr1_249115368_249115616_FOSL1_MA0477.1_center28	AP-1	TTGATTCAG	28	ETS	ACCGGAAGT	767	787	779	520	443	648	1.36357	2.29358	-0.930013	-0.14218	-2.43576	1.50575
chr1_249115368_249115616_FOSL1_MA0477.1_center28_to_MECP2_HUMAN.H11MO.0.C	chr1_249115368_249115616	CTGCAGCCTGAGTCCCCATGCCTTCCCGGAGGTGTCCTGGCATCCTGGGAATCTGACTGCTGTGCCCTGGGAAGGTCACCCTCCCTGCTGGCTGCTGGCTCACTGATGGATGATGCACGTTGATTCAGACTTTGTCCTCCCCAAATTCCGTTTCAGCTGAGTGCCAGGAGTCCCTGGTGAAGCAGGCCAAATGGAATGTGTTGCTGACTGCCCAAAACTGTCCCAGGTCCTCAGTGGATTCCTGCTCAG	-	chr1_249115368_249115616_FOSL1_MA0477.1_center28	AP-1	TGATTCA	28	MECP2	CCCGGAG	564	689	608	186	160	223	0.194385	2.29358	-2.0992	-0.14218	-2.43576	0.336565
chr1_249115368_249115616_FOSL1_MA0477.1_center28_to_TP53_MA0106.3	chr1_249115368_249115616	CTGCAGCCTGAGTCCCCATGACATGCCCGGGCATGTCTGGCATCCTGGGAATCTGACTGCTGTGCCCTGGGAAGGTCACCCTCCCTGCTGGCTGCTGGCTCACTGATGGATGATGCACGTTGATTCAGACTTTGTCCTCCCCAAATTCCGTTTCAGCTGAGTGCCAGGAGTCCCTGGTGAAGCAGGCCAAATGGAATGTGTTGCTGACTGCCCAAAACTGTCCCAGGTCCTCAGTGGATTCCTGCTCAG	-	chr1_249115368_249115616_FOSL1_MA0477.1_center28	AP-1	CCTTTGATTCAGTGTC	28	P53	ACATGCCCGGGCATGT	931	978	932	4182	3241	4557	3.98878	2.29358	1.6952	-0.14218	-2.43576	4.13096
chr1_30447205_30447453_MAFK_MA0496.2_center121_to_CREB1_MA0018.3	chr1_30447205_30447453	ATTTTATCTAGTAGATCAATCAAGAAGAAATTTAAATTGAGCATTATGAGTGAGTCATTGTCTTGTATGCAAAACAATGAGTGCAAATGTTAGAGCAACAGGAGAGGGGAATTCACATGACGTCACCTGACTGTGAATGACTTCCCAATGAGGTAAGCATTCAATCTCAAACAATGCTTCGAAGATGAATGACATTTCTAAAATTCCACAGAGAGTGAGTAGTGGAGCCTGGGCCCAAATTAGGTTCTG	+	chr1_30447205_30447453_MAFK_MA0496.2_center121	MAF	TGACTCAG	121	CREB1	TGACGTCA	223	236	229	797	908	588	3.7538	4.68782	-0.934016	3.42906	-1.25876	0.324744
chr1_30447205_30447453_MAFK_MA0496.2_center121_to_E2F1_HUMAN.H11MO.0.A	chr1_30447205_30447453	ATTTTATCTAGTAGATCAATCAAGAAGAAATTTAAATTGAGCATTATGAGTGAGTCATTGTCTTGTATGCAAAACAATGAGTGCAAATGTTAGAGCAACAGGAGAGGGGAATTCACAGGCGGGAACCTGACTGTGAATGACTTCCCAATGAGGTAAGCATTCAATCTCAAACAATGCTTCGAAGATGAATGACATTTCTAAAATTCCACAGAGAGTGAGTAGTGGAGCCTGGGCCCAAATTAGGTTCTG	+	chr1_30447205_30447453_MAFK_MA0496.2_center121	MAF	TGACTCAG	121	E2F1	GGCGGGAA	53	60	55	77	75	60	2.30417	4.68782	-2.38365	3.42906	-1.25876	-1.12489
chr1_30447205_30447453_MAFK_MA0496.2_center121_to_EGR1_C2H2_1	chr1_30447205_30447453	ATTTTATCTAGTAGATCAATCAAGAAGAAATTTAAATTGAGCATTATGAGTGAGTCATTGTCTTGTATGCAAAACAATGAGTGCAAATGTTAGAGCAACAGGAGAGGGGAATTCAACGCCCACGCACTGACTGTGAATGACTTCCCAATGAGGTAAGCATTCAATCTCAAACAATGCTTCGAAGATGAATGACATTTCTAAAATTCCACAGAGAGTGAGTAGTGGAGCCTGGGCCCAAATTAGGTTCTG	+	chr1_30447205_30447453_MAFK_MA0496.2_center121	MAF	CATGACTCAGC	121	EGR1	ACGCCCACGCA	77	71	82	387	320	344	4.14206	4.68782	-0.545754	3.42906	-1.25876	0.713005
chr1_30447205_30447453_MAFK_MA0496.2_center121_to_ETS1_HUMAN.H11MO.0.A	chr1_30447205_30447453	ATTTTATCTAGTAGATCAATCAAGAAGAAATTTAAATTGAGCATTATGAGTGAGTCATTGTCTTGTATGCAAAACAATGAGTGCAAATGTTAGAGCAACAGGAGAGGGGAATTCACACCGGAAGTCCTGACTGTGAATGACTTCCCAATGAGGTAAGCATTCAATCTCAAACAATGCTTCGAAGATGAATGACATTTCTAAAATTCCACAGAGAGTGAGTAGTGGAGCCTGGGCCCAAATTAGGTTCTG	+	chr1_30447205_30447453_MAFK_MA0496.2_center121	MAF	ATGACTCAG	121	ETS	ACCGGAAGT	76	74	100	306	273	251	3.7034	4.68782	-0.98442	3.42906	-1.25876	0.27434
chr1_30447205_30447453_MAFK_MA0496.2_center121_to_FOSL1_MA0477.1	chr1_30447205_30447453	ATTTTATCTAGTAGATCAATCAAGAAGAAATTTAAATTGAGCATTATGAGTGAGTCATTGTCTTGTATGCAAAACAATGAGTGCAAATGTTAGAGCAACAGGAGAGGGGAATTCACGTGACTCATCCTGACTGTGAATGACTTCCCAATGAGGTAAGCATTCAATCTCAAACAATGCTTCGAAGATGAATGACATTTCTAAAATTCCACAGAGAGTGAGTAGTGGAGCCTGGGCCCAAATTAGGTTCTG	+	chr1_30447205_30447453_MAFK_MA0496.2_center121	MAF	ATGACTCAG	121	AP-1	GTGACTCAT	228	269	226	1539	1543	1399	4.60488	4.68782	-0.0829373	3.42906	-1.25876	1.17582
chr1_30447205_30447453_MAFK_MA0496.2_center121_to_MECP2_HUMAN.H11MO.0.C	chr1_30447205_30447453	ATTTTATCTAGTAGATCAATCAAGAAGAAATTTAAATTGAGCATTATGAGTGAGTCATTGTCTTGTATGCAAAACAATGAGTGCAAATGTTAGAGCAACAGGAGAGGGGAATTCACACCCGGAGGCCTGACTGTGAATGACTTCCCAATGAGGTAAGCATTCAATCTCAAACAATGCTTCGAAGATGAATGACATTTCTAAAATTCCACAGAGAGTGAGTAGTGGAGCCTGGGCCCAAATTAGGTTCTG	+	chr1_30447205_30447453_MAFK_MA0496.2_center121	MAF	TGACTCA	121	MECP2	CCCGGAG	133	145	135	182	167	168	2.27511	4.68782	-2.4127	3.42906	-1.25876	-1.15395
chr1_30447205_30447453_MAFK_MA0496.2_center121_to_TP53_MA0106.3	chr1_30447205_30447453	ATTTTATCTAGTAGATCAATCAAGAAGAAATTTAAATTGAGCATTATGAGTGAGTCATTGTCTTGTATGCAAAACAATGAGTGCAAATGTTAGAGCAACAGGAGAGGGGAATTACATGCCCGGGCATGTACTGTGAATGACTTCCCAATGAGGTAAGCATTCAATCTCAAACAATGCTTCGAAGATGAATGACATTTCTAAAATTCCACAGAGAGTGAGTAGTGGAGCCTGGGCCCAAATTAGGTTCTG	+	chr1_30447205_30447453_MAFK_MA0496.2_center121	MAF	CACATGACTCAGCCTG	121	P53	ACATGCCCGGGCATGT	148	169	156	957	840	1344	4.61315	4.68782	-0.0746626	3.42906	-1.25876	1.1841
chr1_30447205_30447453_TP53_MA0106.3_center123_to_E2F1_HUMAN.H11MO.0.A	chr1_30447205_30447453	ATTTTATCTAGTAGATCAATCAAGAAGAAATTTAAATTGAGCATTATGAGTGAGTCATTGTCTTGTATGCAAAACAATGAGTGCAAATGTTAGAGCAACAGGAGAGGGGAATTCACATGGGCGGGAATGACTGTGAATGACTTCCCAATGAGGTAAGCATTCAATCTCAAACAATGCTTCGAAGATGAATGACATTTCTAAAATTCCACAGAGAGTGAGTAGTGGAGCCTGGGCCCAAATTAGGTTCTG	+	chr1_30447205_30447453_TP53_MA0106.3_center123	P53	ACTCAGCC	123	E2F1	GGCGGGAA	130	153	138	227	206	179	2.51645	4.68782	-2.17137	0.756541	-3.93127	1.75991
chr1_30447205_30447453_TP53_MA0106.3_center123_to_EGR1_C2H2_1	chr1_30447205_30447453	ATTTTATCTAGTAGATCAATCAAGAAGAAATTTAAATTGAGCATTATGAGTGAGTCATTGTCTTGTATGCAAAACAATGAGTGCAAATGTTAGAGCAACAGGAGAGGGGAATTCACAACGCCCACGCAGACTGTGAATGACTTCCCAATGAGGTAAGCATTCAATCTCAAACAATGCTTCGAAGATGAATGACATTTCTAAAATTCCACAGAGAGTGAGTAGTGGAGCCTGGGCCCAAATTAGGTTCTG	+	chr1_30447205_30447453_TP53_MA0106.3_center123	P53	TGACTCAGCCT	123	EGR1	ACGCCCACGCA	80	89	72	294	270	249	3.72182	4.68782	-0.965997	0.756541	-3.93127	2.96528
chr1_30447205_30447453_TP53_MA0106.3_center123_to_ETS1_HUMAN.H11MO.0.A	chr1_30447205_30447453	ATTTTATCTAGTAGATCAATCAAGAAGAAATTTAAATTGAGCATTATGAGTGAGTCATTGTCTTGTATGCAAAACAATGAGTGCAAATGTTAGAGCAACAGGAGAGGGGAATTCACATACCGGAAGTTGACTGTGAATGACTTCCCAATGAGGTAAGCATTCAATCTCAAACAATGCTTCGAAGATGAATGACATTTCTAAAATTCCACAGAGAGTGAGTAGTGGAGCCTGGGCCCAAATTAGGTTCTG	+	chr1_30447205_30447453_TP53_MA0106.3_center123	P53	GACTCAGCC	123	ETS	ACCGGAAGT	35	37	31	113	88	83	3.42331	4.68782	-1.26451	0.756541	-3.93127	2.66677
chr1_30447205_30447453_TP53_MA0106.3_center123_to_FOSL1_MA0477.1	chr1_30447205_30447453	ATTTTATCTAGTAGATCAATCAAGAAGAAATTTAAATTGAGCATTATGAGTGAGTCATTGTCTTGTATGCAAAACAATGAGTGCAAATGTTAGAGCAACAGGAGAGGGGAATTCACATGTGACTCATTGACTGTGAATGACTTCCCAATGAGGTAAGCATTCAATCTCAAACAATGCTTCGAAGATGAATGACATTTCTAAAATTCCACAGAGAGTGAGTAGTGGAGCCTGGGCCCAAATTAGGTTCTG	+	chr1_30447205_30447453_TP53_MA0106.3_center123	P53	GACTCAGCC	123	AP-1	GTGACTCAT	226	200	187	1561	1493	1277	4.80012	4.68782	0.112303	0.756541	-3.93127	4.04358
chr1_30447205_30447453_TP53_MA0106.3_center123_to_MAFK_MA0496.2	chr1_30447205_30447453	ATTTTATCTAGTAGATCAATCAAGAAGAAATTTAAATTGAGCATTATGAGTGAGTCATTGTCTTGTATGCAAAACAATGAGTGCAAATGTTAGAGCAACAGGAGAGGGGAATTCACTGCTGAGTCAGCAACTGTGAATGACTTCCCAATGAGGTAAGCATTCAATCTCAAACAATGCTTCGAAGATGAATGACATTTCTAAAATTCCACAGAGAGTGAGTAGTGGAGCCTGGGCCCAAATTAGGTTCTG	+	chr1_30447205_30447453_TP53_MA0106.3_center123	P53	ATGACTCAGCCTG	123	MAF	TGCTGAGTCAGCA	120	107	112	394	377	327	3.67086	4.68782	-1.01696	0.756541	-3.93127	2.91432
chr1_31944428_31944676_FOSL1_MA0477.1_center158_to_CREB1_MA0018.3	chr1_31944428_31944676	TTCCGATTGGCTATTTTAAAGAGAGCAGGGGTACAAGCTGGAGTGACAGGGTGAGAAGTTTGGCGGGAGGGGTGGTTACAGAACAGTTGACTCAGGATGATTCAGGTCAGAGCAGGTGACAGGGGTGACTCAAGATGGAGCAGGTGACCAGGGGTGACGTCAGACAAAGCAGGTGACCAGGGGAACAGATGTGAACTACTGATTAGAACTGGCAGGAAACTTGTTTACTGAAACTAGAGGCAAGCGGGG	+	chr1_31944428_31944676_FOSL1_MA0477.1_center158	AP-1	TGACTCAG	158	CREB1	TGACGTCA	131	168	166	429	362	326	3.24506	2.96993	0.275136	-0.00102024	-2.97095	3.24608
chr1_31944428_31944676_FOSL1_MA0477.1_center158_to_E2F1_HUMAN.H11MO.0.A	chr1_31944428_31944676	TTCCGATTGGCTATTTTAAAGAGAGCAGGGGTACAAGCTGGAGTGACAGGGTGAGAAGTTTGGCGGGAGGGGTGGTTACAGAACAGTTGACTCAGGATGATTCAGGTCAGAGCAGGTGACAGGGGTGACTCAAGATGGAGCAGGTGACCAGGGGGGCGGGAAGACAAAGCAGGTGACCAGGGGAACAGATGTGAACTACTGATTAGAACTGGCAGGAAACTTGTTTACTGAAACTAGAGGCAAGCGGGG	+	chr1_31944428_31944676_FOSL1_MA0477.1_center158	AP-1	TGACTCAG	158	E2F1	GGCGGGAA	88	112	110	52	39	42	0.708201	2.96993	-2.26173	-0.00102024	-2.97095	0.709221
chr1_31944428_31944676_FOSL1_MA0477.1_center158_to_EGR1_C2H2_1	chr1_31944428_31944676	TTCCGATTGGCTATTTTAAAGAGAGCAGGGGTACAAGCTGGAGTGACAGGGTGAGAAGTTTGGCGGGAGGGGTGGTTACAGAACAGTTGACTCAGGATGATTCAGGTCAGAGCAGGTGACAGGGGTGACTCAAGATGGAGCAGGTGACCAGGACGCCCACGCAACAAAGCAGGTGACCAGGGGAACAGATGTGAACTACTGATTAGAACTGGCAGGAAACTTGTTTACTGAAACTAGAGGCAAGCGGGG	+	chr1_31944428_31944676_FOSL1_MA0477.1_center158	AP-1	GGTGACTCAGG	158	EGR1	ACGCCCACGCA	50	31	47	57	44	45	2.12243	2.96993	-0.847502	-0.00102024	-2.97095	2.12345
chr1_31944428_31944676_FOSL1_MA0477.1_center158_to_ETS1_HUMAN.H11MO.0.A	chr1_31944428_31944676	TTCCGATTGGCTATTTTAAAGAGAGCAGGGGTACAAGCTGGAGTGACAGGGTGAGAAGTTTGGCGGGAGGGGTGGTTACAGAACAGTTGACTCAGGATGATTCAGGTCAGAGCAGGTGACAGGGGTGACTCAAGATGGAGCAGGTGACCAGGGACCGGAAGTGACAAAGCAGGTGACCAGGGGAACAGATGTGAACTACTGATTAGAACTGGCAGGAAACTTGTTTACTGAAACTAGAGGCAAGCGGGG	+	chr1_31944428_31944676_FOSL1_MA0477.1_center158	AP-1	GTGACTCAG	158	ETS	ACCGGAAGT	21	22	20	96	68	69	3.83834	2.96993	0.868409	-0.00102024	-2.97095	3.83936
chr1_31944428_31944676_FOSL1_MA0477.1_center158_to_MECP2_HUMAN.H11MO.0.C	chr1_31944428_31944676	TTCCGATTGGCTATTTTAAAGAGAGCAGGGGTACAAGCTGGAGTGACAGGGTGAGAAGTTTGGCGGGAGGGGTGGTTACAGAACAGTTGACTCAGGATGATTCAGGTCAGAGCAGGTGACAGGGGTGACTCAAGATGGAGCAGGTGACCAGGGGCCCGGAGGGACAAAGCAGGTGACCAGGGGAACAGATGTGAACTACTGATTAGAACTGGCAGGAAACTTGTTTACTGAAACTAGAGGCAAGCGGGG	+	chr1_31944428_31944676_FOSL1_MA0477.1_center158	AP-1	TGACTCA	158	MECP2	CCCGGAG	75	90	70	34	29	37	0.659073	2.96993	-2.31086	-0.00102024	-2.97095	0.660093
chr1_31944428_31944676_FOSL1_MA0477.1_center158_to_TP53_MA0106.3	chr1_31944428_31944676	TTCCGATTGGCTATTTTAAAGAGAGCAGGGGTACAAGCTGGAGTGACAGGGTGAGAAGTTTGGCGGGAGGGGTGGTTACAGAACAGTTGACTCAGGATGATTCAGGTCAGAGCAGGTGACAGGGGTGACTCAAGATGGAGCAGGTGACCAACATGCCCGGGCATGTAAGCAGGTGACCAGGGGAACAGATGTGAACTACTGATTAGAACTGGCAGGAAACTTGTTTACTGAAACTAGAGGCAAGCGGGG	+	chr1_31944428_31944676_FOSL1_MA0477.1_center158	AP-1	GGGGTGACTCAGGACA	158	P53	ACATGCCCGGGCATGT	17	19	25	114	74	104	4.17484	2.96993	1.20491	-0.00102024	-2.97095	4.17586
chr1_31944428_31944676_TP53_MA0106.3_center110_to_E2F1_HUMAN.H11MO.0.A	chr1_31944428_31944676	TTCCGATTGGCTATTTTAAAGAGAGCAGGGGTACAAGCTGGAGTGACAGGGTGAGAAGTTTGGCGGGAGGGGTGGTTACAGAACAGTTGACTCAGGATGATTCAGGGGCGGGAAGGTGACAGGGGTGACTCAAGATGGAGCAGGTGACCAGGGGTGACTCAGGACAAAGCAGGTGACCAGGGGAACAGATGTGAACTACTGATTAGAACTGGCAGGAAACTTGTTTACTGAAACTAGAGGCAAGCGGGG	+	chr1_31944428_31944676_TP53_MA0106.3_center110	P53	TCAGAGCA	110	E2F1	GGCGGGAA	90	91	109	206	199	180	2.98034	2.96993	0.0104116	0.495895	-2.47403	2.48445
chr1_31944428_31944676_TP53_MA0106.3_center110_to_EGR1_C2H2_1	chr1_31944428_31944676	TTCCGATTGGCTATTTTAAAGAGAGCAGGGGTACAAGCTGGAGTGACAGGGTGAGAAGTTTGGCGGGAGGGGTGGTTACAGAACAGTTGACTCAGGATGATTCAACGCCCACGCAGTGACAGGGGTGACTCAAGATGGAGCAGGTGACCAGGGGTGACTCAGGACAAAGCAGGTGACCAGGGGAACAGATGTGAACTACTGATTAGAACTGGCAGGAAACTTGTTTACTGAAACTAGAGGCAAGCGGGG	+	chr1_31944428_31944676_TP53_MA0106.3_center110	P53	GGTCAGAGCAG	110	EGR1	ACGCCCACGCA	142	138	131	449	439	428	3.6365	2.96993	0.666569	0.495895	-2.47403	3.1406
chr1_31944428_31944676_TP53_MA0106.3_center110_to_ETS1_HUMAN.H11MO.0.A	chr1_31944428_31944676	TTCCGATTGGCTATTTTAAAGAGAGCAGGGGTACAAGCTGGAGTGACAGGGTGAGAAGTTTGGCGGGAGGGGTGGTTACAGAACAGTTGACTCAGGATGATTCAGACCGGAAGTGGTGACAGGGGTGACTCAAGATGGAGCAGGTGACCAGGGGTGACTCAGGACAAAGCAGGTGACCAGGGGAACAGATGTGAACTACTGATTAGAACTGGCAGGAAACTTGTTTACTGAAACTAGAGGCAAGCGGGG	+	chr1_31944428_31944676_TP53_MA0106.3_center110	P53	GTCAGAGCA	110	ETS	ACCGGAAGT	29	36	34	231	179	193	4.5588	2.96993	1.58887	0.495895	-2.47403	4.06291
chr1_31944428_31944676_TP53_MA0106.3_center110_to_FOSL1_MA0477.1	chr1_31944428_31944676	TTCCGATTGGCTATTTTAAAGAGAGCAGGGGTACAAGCTGGAGTGACAGGGTGAGAAGTTTGGCGGGAGGGGTGGTTACAGAACAGTTGACTCAGGATGATTCAGGTGACTCATGGTGACAGGGGTGACTCAAGATGGAGCAGGTGACCAGGGGTGACTCAGGACAAAGCAGGTGACCAGGGGAACAGATGTGAACTACTGATTAGAACTGGCAGGAAACTTGTTTACTGAAACTAGAGGCAAGCGGGG	+	chr1_31944428_31944676_TP53_MA0106.3_center110	P53	GTCAGAGCA	110	AP-1	GTGACTCAT	38	44	50	170	137	155	3.74815	2.96993	0.778222	0.495895	-2.47403	3.25226
chr1_31944428_31944676_TP53_MA0106.3_center110_to_MAFK_MA0496.2	chr1_31944428_31944676	TTCCGATTGGCTATTTTAAAGAGAGCAGGGGTACAAGCTGGAGTGACAGGGTGAGAAGTTTGGCGGGAGGGGTGGTTACAGAACAGTTGACTCAGGATGATTCTGCTGAGTCAGCATGACAGGGGTGACTCAAGATGGAGCAGGTGACCAGGGGTGACTCAGGACAAAGCAGGTGACCAGGGGAACAGATGTGAACTACTGATTAGAACTGGCAGGAAACTTGTTTACTGAAACTAGAGGCAAGCGGGG	+	chr1_31944428_31944676_TP53_MA0106.3_center110	P53	AGGTCAGAGCAGG	110	MAF	TGCTGAGTCAGCA	111	96	102	285	216	240	3.2073	2.96993	0.237375	0.495895	-2.47403	2.71141
chr1_36638718_36638966_ETS1_HUMAN.H11MO.0.A_center21_to_CREB1_MA0018.3	chr1_36638718_36638966	GAATCAACTCATGCACTTGACGTCAGACTCAGGAACAGTGAAAAGCTCCCCAAGAACAAGTTGAAAGGGATCTTGGTCCTTAATCATAGCAAGGATTTGGTAACCTTGGTTACCTGCAATGAGTCAGGAAAAGACTCCAAGGGAAGGGAGTGGGGGAGGCATTGTCACAGGAGGAAGAAGGGCCTCTATCCCAAATTCGATGAATGTTCTGAGTCCACATCTCTCTCTTCTCCCCACCTTCCCCCAGGA	+	chr1_36638718_36638966_ETS1_HUMAN.H11MO.0.A_center21	ETS	CAGGAAAT	21	CREB1	TGACGTCA	160	188	148	37	37	44	-0.173834	2.93541	-3.10924	0.813819	-2.12159	-0.987652
chr1_36638718_36638966_ETS1_HUMAN.H11MO.0.A_center21_to_E2F1_HUMAN.H11MO.0.A	chr1_36638718_36638966	GAATCAACTCATGCACTGGCGGGAAGACTCAGGAACAGTGAAAAGCTCCCCAAGAACAAGTTGAAAGGGATCTTGGTCCTTAATCATAGCAAGGATTTGGTAACCTTGGTTACCTGCAATGAGTCAGGAAAAGACTCCAAGGGAAGGGAGTGGGGGAGGCATTGTCACAGGAGGAAGAAGGGCCTCTATCCCAAATTCGATGAATGTTCTGAGTCCACATCTCTCTCTTCTCCCCACCTTCCCCCAGGA	+	chr1_36638718_36638966_ETS1_HUMAN.H11MO.0.A_center21	ETS	CAGGAAAT	21	E2F1	GGCGGGAA	300	296	302	51	59	77	-0.377268	2.93541	-3.31268	0.813819	-2.12159	-1.19109
chr1_36638718_36638966_ETS1_HUMAN.H11MO.0.A_center21_to_EGR1_C2H2_1	chr1_36638718_36638966	GAATCAACTCATGCAACGCCCACGCAACTCAGGAACAGTGAAAAGCTCCCCAAGAACAAGTTGAAAGGGATCTTGGTCCTTAATCATAGCAAGGATTTGGTAACCTTGGTTACCTGCAATGAGTCAGGAAAAGACTCCAAGGGAAGGGAGTGGGGGAGGCATTGTCACAGGAGGAAGAAGGGCCTCTATCCCAAATTCGATGAATGTTCTGAGTCCACATCTCTCTCTTCTCCCCACCTTCCCCCAGGA	+	chr1_36638718_36638966_ETS1_HUMAN.H11MO.0.A_center21	ETS	CTCAGGAAATG	21	EGR1	ACGCCCACGCA	175	195	184	76	78	119	0.85268	2.93541	-2.08273	0.813819	-2.12159	0.0388616
chr1_36638718_36638966_ETS1_HUMAN.H11MO.0.A_center21_to_FOSL1_MA0477.1	chr1_36638718_36638966	GAATCAACTCATGCACGTGACTCATGACTCAGGAACAGTGAAAAGCTCCCCAAGAACAAGTTGAAAGGGATCTTGGTCCTTAATCATAGCAAGGATTTGGTAACCTTGGTTACCTGCAATGAGTCAGGAAAAGACTCCAAGGGAAGGGAGTGGGGGAGGCATTGTCACAGGAGGAAGAAGGGCCTCTATCCCAAATTCGATGAATGTTCTGAGTCCACATCTCTCTCTTCTCCCCACCTTCCCCCAGGA	+	chr1_36638718_36638966_ETS1_HUMAN.H11MO.0.A_center21	ETS	TCAGGAAAT	21	AP-1	GTGACTCAT	171	172	193	134	130	172	1.60477	2.93541	-1.33064	0.813819	-2.12159	0.790947
chr1_36638718_36638966_ETS1_HUMAN.H11MO.0.A_center21_to_MAFK_MA0496.2	chr1_36638718_36638966	GAATCAACTCATGCTGCTGAGTCAGCACTCAGGAACAGTGAAAAGCTCCCCAAGAACAAGTTGAAAGGGATCTTGGTCCTTAATCATAGCAAGGATTTGGTAACCTTGGTTACCTGCAATGAGTCAGGAAAAGACTCCAAGGGAAGGGAGTGGGGGAGGCATTGTCACAGGAGGAAGAAGGGCCTCTATCCCAAATTCGATGAATGTTCTGAGTCCACATCTCTCTCTTCTCCCCACCTTCCCCCAGGA	+	chr1_36638718_36638966_ETS1_HUMAN.H11MO.0.A_center21	ETS	ACTCAGGAAATGA	21	MAF	TGCTGAGTCAGCA	282	276	281	87	82	98	0.261513	2.93541	-2.6739	0.813819	-2.12159	-0.552306
chr1_36638718_36638966_ETS1_HUMAN.H11MO.0.A_center21_to_MECP2_HUMAN.H11MO.0.C	chr1_36638718_36638966	GAATCAACTCATGCACTCCCGGAGTGACTCAGGAACAGTGAAAAGCTCCCCAAGAACAAGTTGAAAGGGATCTTGGTCCTTAATCATAGCAAGGATTTGGTAACCTTGGTTACCTGCAATGAGTCAGGAAAAGACTCCAAGGGAAGGGAGTGGGGGAGGCATTGTCACAGGAGGAAGAAGGGCCTCTATCCCAAATTCGATGAATGTTCTGAGTCCACATCTCTCTCTTCTCCCCACCTTCCCCCAGGA	+	chr1_36638718_36638966_ETS1_HUMAN.H11MO.0.A_center21	ETS	CAGGAAA	21	MECP2	CCCGGAG	136	187	149	71	65	93	0.846722	2.93541	-2.08869	0.813819	-2.12159	0.0329032
chr1_36638718_36638966_ETS1_HUMAN.H11MO.0.A_center21_to_TP53_MA0106.3	chr1_36638718_36638966	GAATCAACTCATGACATGCCCGGGCATGTCAGGAACAGTGAAAAGCTCCCCAAGAACAAGTTGAAAGGGATCTTGGTCCTTAATCATAGCAAGGATTTGGTAACCTTGGTTACCTGCAATGAGTCAGGAAAAGACTCCAAGGGAAGGGAGTGGGGGAGGCATTGTCACAGGAGGAAGAAGGGCCTCTATCCCAAATTCGATGAATGTTCTGAGTCCACATCTCTCTCTTCTCCCCACCTTCCCCCAGGA	+	chr1_36638718_36638966_ETS1_HUMAN.H11MO.0.A_center21	ETS	CACTCAGGAAATGACT	21	P53	ACATGCCCGGGCATGT	234	259	290	866	768	1186	3.73768	2.93541	0.802275	0.813819	-2.12159	2.92387
chr1_36638718_36638966_FOSL1_MA0477.1_center28_to_CREB1_MA0018.3	chr1_36638718_36638966	GAATCAACTCATGCACTCAGGAAATGACGTCAGAACAGTGAAAAGCTCCCCAAGAACAAGTTGAAAGGGATCTTGGTCCTTAATCATAGCAAGGATTTGGTAACCTTGGTTACCTGCAATGAGTCAGGAAAAGACTCCAAGGGAAGGGAGTGGGGGAGGCATTGTCACAGGAGGAAGAAGGGCCTCTATCCCAAATTCGATGAATGTTCTGAGTCCACATCTCTCTCTTCTCCCCACCTTCCCCCAGGA	+	chr1_36638718_36638966_FOSL1_MA0477.1_center28	AP-1	TGACTCAG	28	CREB1	TGACGTCA	190	206	212	339	357	303	2.69432	2.93541	-0.241089	-0.58214	-3.51755	3.27646
chr1_36638718_36638966_FOSL1_MA0477.1_center28_to_E2F1_HUMAN.H11MO.0.A	chr1_36638718_36638966	GAATCAACTCATGCACTCAGGAAAGGCGGGAAGAACAGTGAAAAGCTCCCCAAGAACAAGTTGAAAGGGATCTTGGTCCTTAATCATAGCAAGGATTTGGTAACCTTGGTTACCTGCAATGAGTCAGGAAAAGACTCCAAGGGAAGGGAGTGGGGGAGGCATTGTCACAGGAGGAAGAAGGGCCTCTATCCCAAATTCGATGAATGTTCTGAGTCCACATCTCTCTCTTCTCCCCACCTTCCCCCAGGA	+	chr1_36638718_36638966_FOSL1_MA0477.1_center28	AP-1	TGACTCAG	28	E2F1	GGCGGGAA	249	226	234	35	42	59	-0.511921	2.93541	-3.44733	-0.58214	-3.51755	0.0702195
chr1_36638718_36638966_FOSL1_MA0477.1_center28_to_EGR1_C2H2_1	chr1_36638718_36638966	GAATCAACTCATGCACTCAGGAACGCCCACGCAAACAGTGAAAAGCTCCCCAAGAACAAGTTGAAAGGGATCTTGGTCCTTAATCATAGCAAGGATTTGGTAACCTTGGTTACCTGCAATGAGTCAGGAAAAGACTCCAAGGGAAGGGAGTGGGGGAGGCATTGTCACAGGAGGAAGAAGGGCCTCTATCCCAAATTCGATGAATGTTCTGAGTCCACATCTCTCTCTTCTCCCCACCTTCCCCCAGGA	+	chr1_36638718_36638966_FOSL1_MA0477.1_center28	AP-1	AATGACTCAGG	28	EGR1	ACGCCCACGCA	129	139	117	41	42	61	0.454898	2.93541	-2.48051	-0.58214	-3.51755	1.03704
chr1_36638718_36638966_FOSL1_MA0477.1_center28_to_ETS1_HUMAN.H11MO.0.A	chr1_36638718_36638966	GAATCAACTCATGCACTCAGGAAACCGGAAGTGAACAGTGAAAAGCTCCCCAAGAACAAGTTGAAAGGGATCTTGGTCCTTAATCATAGCAAGGATTTGGTAACCTTGGTTACCTGCAATGAGTCAGGAAAAGACTCCAAGGGAAGGGAGTGGGGGAGGCATTGTCACAGGAGGAAGAAGGGCCTCTATCCCAAATTCGATGAATGTTCTGAGTCCACATCTCTCTCTTCTCCCCACCTTCCCCCAGGA	+	chr1_36638718_36638966_FOSL1_MA0477.1_center28	AP-1	ATGACTCAG	28	ETS	ACCGGAAGT	211	214	196	88	86	181	1.01756	2.93541	-1.91785	-0.58214	-3.51755	1.5997
chr1_36638718_36638966_FOSL1_MA0477.1_center28_to_MECP2_HUMAN.H11MO.0.C	chr1_36638718_36638966	GAATCAACTCATGCACTCAGGAAACCCGGAGGGAACAGTGAAAAGCTCCCCAAGAACAAGTTGAAAGGGATCTTGGTCCTTAATCATAGCAAGGATTTGGTAACCTTGGTTACCTGCAATGAGTCAGGAAAAGACTCCAAGGGAAGGGAGTGGGGGAGGCATTGTCACAGGAGGAAGAAGGGCCTCTATCCCAAATTCGATGAATGTTCTGAGTCCACATCTCTCTCTTCTCCCCACCTTCCCCCAGGA	+	chr1_36638718_36638966_FOSL1_MA0477.1_center28	AP-1	TGACTCA	28	MECP2	CCCGGAG	276	300	282	53	42	78	-0.453069	2.93541	-3.38848	-0.58214	-3.51755	0.129071
chr1_36638718_36638966_FOSL1_MA0477.1_center28_to_TP53_MA0106.3	chr1_36638718_36638966	GAATCAACTCATGCACTCAGACATGCCCGGGCATGTAGTGAAAAGCTCCCCAAGAACAAGTTGAAAGGGATCTTGGTCCTTAATCATAGCAAGGATTTGGTAACCTTGGTTACCTGCAATGAGTCAGGAAAAGACTCCAAGGGAAGGGAGTGGGGGAGGCATTGTCACAGGAGGAAGAAGGGCCTCTATCCCAAATTCGATGAATGTTCTGAGTCCACATCTCTCTCTTCTCCCCACCTTCCCCCAGGA	+	chr1_36638718_36638966_FOSL1_MA0477.1_center28	AP-1	GAAATGACTCAGGAAC	28	P53	ACATGCCCGGGCATGT	154	155	142	385	305	507	3.28653	2.93541	0.351116	-0.58214	-3.51755	3.86867
chr1_37920718_37920966_CREB1_MA0018.3_center131_to_E2F1_HUMAN.H11MO.0.A	chr1_37920718_37920966	TGCAGAGAAGTTAGGAGATCCATCAAAGCAGCCAGACCACCTGGTGGGAGGCGGCACACACTCTGCCAGTCCGGACACGGGTTAGGGAGTGGCATCACATTCCGCCGAGTCATTGCCTGCGAAGACTGGCGGGAACTCTGATGTCAGGGCTCCAAGGGGCTTCGTTCCAGCTCCAGGCTCCAGGAAAGGGCGTCGCAGGGCCCAGAGGTTACACAACTTCCCCCAAGATCGCTGTGGAAATGACTGGCA	+	chr1_37920718_37920966_CREB1_MA0018.3_center131	CREB1	AACGTCAC	131	E2F1	GGCGGGAA	202	218	198	164	113	208	1.51996	2.61261	-1.09265	1.20635	-1.40626	0.313617
chr1_37920718_37920966_CREB1_MA0018.3_center131_to_EGR1_C2H2_1	chr1_37920718_37920966	TGCAGAGAAGTTAGGAGATCCATCAAAGCAGCCAGACCACCTGGTGGGAGGCGGCACACACTCTGCCAGTCCGGACACGGGTTAGGGAGTGGCATCACATTCCGCCGAGTCATTGCCTGCGAAGAACGCCCACGCATCTGATGTCAGGGCTCCAAGGGGCTTCGTTCCAGCTCCAGGCTCCAGGAAAGGGCGTCGCAGGGCCCAGAGGTTACACAACTTCCCCCAAGATCGCTGTGGAAATGACTGGCA	+	chr1_37920718_37920966_CREB1_MA0018.3_center131	CREB1	CTAACGTCACC	131	EGR1	ACGCCCACGCA	371	385	364	779	553	669	2.77841	2.61261	0.1658	1.20635	-1.40626	1.57206
chr1_37920718_37920966_CREB1_MA0018.3_center131_to_ETS1_HUMAN.H11MO.0.A	chr1_37920718_37920966	TGCAGAGAAGTTAGGAGATCCATCAAAGCAGCCAGACCACCTGGTGGGAGGCGGCACACACTCTGCCAGTCCGGACACGGGTTAGGGAGTGGCATCACATTCCGCCGAGTCATTGCCTGCGAAGACACCGGAAGTCTCTGATGTCAGGGCTCCAAGGGGCTTCGTTCCAGCTCCAGGCTCCAGGAAAGGGCGTCGCAGGGCCCAGAGGTTACACAACTTCCCCCAAGATCGCTGTGGAAATGACTGGCA	+	chr1_37920718_37920966_CREB1_MA0018.3_center131	CREB1	TAACGTCAC	131	ETS	ACCGGAAGT	259	247	238	483	417	527	2.86023	2.61261	0.247622	1.20635	-1.40626	1.65389
chr1_37920718_37920966_CREB1_MA0018.3_center131_to_FOSL1_MA0477.1	chr1_37920718_37920966	TGCAGAGAAGTTAGGAGATCCATCAAAGCAGCCAGACCACCTGGTGGGAGGCGGCACACACTCTGCCAGTCCGGACACGGGTTAGGGAGTGGCATCACATTCCGCCGAGTCATTGCCTGCGAAGACGTGACTCATCTCTGATGTCAGGGCTCCAAGGGGCTTCGTTCCAGCTCCAGGCTCCAGGAAAGGGCGTCGCAGGGCCCAGAGGTTACACAACTTCCCCCAAGATCGCTGTGGAAATGACTGGCA	+	chr1_37920718_37920966_CREB1_MA0018.3_center131	CREB1	TAACGTCAC	131	AP-1	GTGACTCAT	302	350	309	1466	1276	1183	4.00541	2.61261	1.3928	1.20635	-1.40626	2.79907
chr1_37920718_37920966_CREB1_MA0018.3_center131_to_MAFK_MA0496.2	chr1_37920718_37920966	TGCAGAGAAGTTAGGAGATCCATCAAAGCAGCCAGACCACCTGGTGGGAGGCGGCACACACTCTGCCAGTCCGGACACGGGTTAGGGAGTGGCATCACATTCCGCCGAGTCATTGCCTGCGAAGTGCTGAGTCAGCACTGATGTCAGGGCTCCAAGGGGCTTCGTTCCAGCTCCAGGCTCCAGGAAAGGGCGTCGCAGGGCCCAGAGGTTACACAACTTCCCCCAAGATCGCTGTGGAAATGACTGGCA	+	chr1_37920718_37920966_CREB1_MA0018.3_center131	CREB1	ACTAACGTCACCT	131	MAF	TGCTGAGTCAGCA	504	547	486	937	671	815	2.5973	2.61261	-0.0153144	1.20635	-1.40626	1.39095
chr1_37920718_37920966_CREB1_MA0018.3_center131_to_MECP2_HUMAN.H11MO.0.C	chr1_37920718_37920966	TGCAGAGAAGTTAGGAGATCCATCAAAGCAGCCAGACCACCTGGTGGGAGGCGGCACACACTCTGCCAGTCCGGACACGGGTTAGGGAGTGGCATCACATTCCGCCGAGTCATTGCCTGCGAAGACTCCCGGAGCCTCTGATGTCAGGGCTCCAAGGGGCTTCGTTCCAGCTCCAGGCTCCAGGAAAGGGCGTCGCAGGGCCCAGAGGTTACACAACTTCCCCCAAGATCGCTGTGGAAATGACTGGCA	+	chr1_37920718_37920966_CREB1_MA0018.3_center131	CREB1	AACGTCA	131	MECP2	CCCGGAG	175	162	187	152	142	162	1.72765	2.61261	-0.884958	1.20635	-1.40626	0.521307
chr1_37920718_37920966_CREB1_MA0018.3_center131_to_TP53_MA0106.3	chr1_37920718_37920966	TGCAGAGAAGTTAGGAGATCCATCAAAGCAGCCAGACCACCTGGTGGGAGGCGGCACACACTCTGCCAGTCCGGACACGGGTTAGGGAGTGGCATCACATTCCGCCGAGTCATTGCCTGCGAAACATGCCCGGGCATGTGATGTCAGGGCTCCAAGGGGCTTCGTTCCAGCTCCAGGCTCCAGGAAAGGGCGTCGCAGGGCCCAGAGGTTACACAACTTCCCCCAAGATCGCTGTGGAAATGACTGGCA	+	chr1_37920718_37920966_CREB1_MA0018.3_center131	CREB1	GACTAACGTCACCTCT	131	P53	ACATGCCCGGGCATGT	93	97	95	539	371	613	4.30867	2.61261	1.69606	1.20635	-1.40626	3.10232
chr1_37920718_37920966_CREB1_MA0018.3_center94_to_E2F1_HUMAN.H11MO.0.A	chr1_37920718_37920966	TGCAGAGAAGTTAGGAGATCCATCAAAGCAGCCAGACCACCTGGTGGGAGGCGGCACACACTCTGCCAGTCCGGACACGGGTTAGGGAGTGGCGGGAAATTCCGCCGAGTCATTGCCTGCGAAGACTAACGTCACCTCTGATGTCAGGGCTCCAAGGGGCTTCGTTCCAGCTCCAGGCTCCAGGAAAGGGCGTCGCAGGGCCCAGAGGTTACACAACTTCCCCCAAGATCGCTGTGGAAATGACTGGCA	+	chr1_37920718_37920966_CREB1_MA0018.3_center94	CREB1	GGCATCAC	94	E2F1	GGCGGGAA	171	208	213	248	259	253	2.31673	2.61261	-0.295883	0.669829	-1.94278	1.6469
chr1_37920718_37920966_CREB1_MA0018.3_center94_to_EGR1_C2H2_1	chr1_37920718_37920966	TGCAGAGAAGTTAGGAGATCCATCAAAGCAGCCAGACCACCTGGTGGGAGGCGGCACACACTCTGCCAGTCCGGACACGGGTTAGGGAACGCCCACGCATTCCGCCGAGTCATTGCCTGCGAAGACTAACGTCACCTCTGATGTCAGGGCTCCAAGGGGCTTCGTTCCAGCTCCAGGCTCCAGGAAAGGGCGTCGCAGGGCCCAGAGGTTACACAACTTCCCCCAAGATCGCTGTGGAAATGACTGGCA	+	chr1_37920718_37920966_CREB1_MA0018.3_center94	CREB1	GTGGCATCACA	94	EGR1	ACGCCCACGCA	349	361	408	352	355	387	1.90863	2.61261	-0.703984	0.669829	-1.94278	1.2388
chr1_37920718_37920966_CREB1_MA0018.3_center94_to_ETS1_HUMAN.H11MO.0.A	chr1_37920718_37920966	TGCAGAGAAGTTAGGAGATCCATCAAAGCAGCCAGACCACCTGGTGGGAGGCGGCACACACTCTGCCAGTCCGGACACGGGTTAGGGAGACCGGAAGTATTCCGCCGAGTCATTGCCTGCGAAGACTAACGTCACCTCTGATGTCAGGGCTCCAAGGGGCTTCGTTCCAGCTCCAGGCTCCAGGAAAGGGCGTCGCAGGGCCCAGAGGTTACACAACTTCCCCCAAGATCGCTGTGGAAATGACTGGCA	+	chr1_37920718_37920966_CREB1_MA0018.3_center94	CREB1	TGGCATCAC	94	ETS	ACCGGAAGT	179	185	187	181	189	211	2.00551	2.61261	-0.607103	0.669829	-1.94278	1.33568
chr1_37920718_37920966_CREB1_MA0018.3_center94_to_FOSL1_MA0477.1	chr1_37920718_37920966	TGCAGAGAAGTTAGGAGATCCATCAAAGCAGCCAGACCACCTGGTGGGAGGCGGCACACACTCTGCCAGTCCGGACACGGGTTAGGGAGGTGACTCATATTCCGCCGAGTCATTGCCTGCGAAGACTAACGTCACCTCTGATGTCAGGGCTCCAAGGGGCTTCGTTCCAGCTCCAGGCTCCAGGAAAGGGCGTCGCAGGGCCCAGAGGTTACACAACTTCCCCCAAGATCGCTGTGGAAATGACTGGCA	+	chr1_37920718_37920966_CREB1_MA0018.3_center94	CREB1	TGGCATCAC	94	AP-1	GTGACTCAT	229	219	223	366	391	294	2.64079	2.61261	0.0281822	0.669829	-1.94278	1.97097
chr1_37920718_37920966_CREB1_MA0018.3_center94_to_MAFK_MA0496.2	chr1_37920718_37920966	TGCAGAGAAGTTAGGAGATCCATCAAAGCAGCCAGACCACCTGGTGGGAGGCGGCACACACTCTGCCAGTCCGGACACGGGTTAGGGTGCTGAGTCAGCATCCGCCGAGTCATTGCCTGCGAAGACTAACGTCACCTCTGATGTCAGGGCTCCAAGGGGCTTCGTTCCAGCTCCAGGCTCCAGGAAAGGGCGTCGCAGGGCCCAGAGGTTACACAACTTCCCCCAAGATCGCTGTGGAAATGACTGGCA	+	chr1_37920718_37920966_CREB1_MA0018.3_center94	CREB1	AGTGGCATCACAT	94	MAF	TGCTGAGTCAGCA	183	197	197	392	361	303	2.85632	2.61261	0.243711	0.669829	-1.94278	2.18649
chr1_37920718_37920966_CREB1_MA0018.3_center94_to_MECP2_HUMAN.H11MO.0.C	chr1_37920718_37920966	TGCAGAGAAGTTAGGAGATCCATCAAAGCAGCCAGACCACCTGGTGGGAGGCGGCACACACTCTGCCAGTCCGGACACGGGTTAGGGAGTCCCGGAGCATTCCGCCGAGTCATTGCCTGCGAAGACTAACGTCACCTCTGATGTCAGGGCTCCAAGGGGCTTCGTTCCAGCTCCAGGCTCCAGGAAAGGGCGTCGCAGGGCCCAGAGGTTACACAACTTCCCCCAAGATCGCTGTGGAAATGACTGGCA	+	chr1_37920718_37920966_CREB1_MA0018.3_center94	CREB1	GGCATCA	94	MECP2	CCCGGAG	130	126	106	101	78	113	1.58473	2.61261	-1.02788	0.669829	-1.94278	0.914903
chr1_37920718_37920966_CREB1_MA0018.3_center94_to_TP53_MA0106.3	chr1_37920718_37920966	TGCAGAGAAGTTAGGAGATCCATCAAAGCAGCCAGACCACCTGGTGGGAGGCGGCACACACTCTGCCAGTCCGGACACGGGTTAGGACATGCCCGGGCATGTCGCCGAGTCATTGCCTGCGAAGACTAACGTCACCTCTGATGTCAGGGCTCCAAGGGGCTTCGTTCCAGCTCCAGGCTCCAGGAAAGGGCGTCGCAGGGCCCAGAGGTTACACAACTTCCCCCAAGATCGCTGTGGAAATGACTGGCA	+	chr1_37920718_37920966_CREB1_MA0018.3_center94	CREB1	GAGTGGCATCACATTC	94	P53	ACATGCCCGGGCATGT	150	149	134	869	730	1046	4.51267	2.61261	1.90005	0.669829	-1.94278	3.84284
chr1_38042230_38042478_FOSL1_MA0477.1_center127_to_CREB1_MA0018.3	chr1_38042230_38042478	GGCCTCCCAAAGTGCTGGGATTACAGGCGTGAGCCACTGTGCCGAGCCTTCTTTTATTTCTTGACCTACATACTTTTAACCTTAACACATACAAGGATAATTTCACTTGCATGACTGAGGAAATGACGTCACTCTGATTTATTAATAAGCATATGTATCCAGCTTACTCAGATTATGTAGGTGGTGTGTATCTAGGCTTCAGATCAAGTTGTATCAACAGTTTTGCACTGTATTCTTGATATTAACAAA	-	chr1_38042230_38042478_FOSL1_MA0477.1_center127	AP-1	TGACTCAC	127	CREB1	TGACGTCA	128	145	121	210	182	183	2.50003	3.52838	-1.02835	-0.0379382	-3.56632	2.53797
chr1_38042230_38042478_FOSL1_MA0477.1_center127_to_E2F1_HUMAN.H11MO.0.A	chr1_38042230_38042478	GGCCTCCCAAAGTGCTGGGATTACAGGCGTGAGCCACTGTGCCGAGCCTTCTTTTATTTCTTGACCTACATACTTTTAACCTTAACACATACAAGGATAATTTCACTTGCATGACTGAGGAAAGGCGGGAACTCTGATTTATTAATAAGCATATGTATCCAGCTTACTCAGATTATGTAGGTGGTGTGTATCTAGGCTTCAGATCAAGTTGTATCAACAGTTTTGCACTGTATTCTTGATATTAACAAA	-	chr1_38042230_38042478_FOSL1_MA0477.1_center127	AP-1	TGACTCAC	127	E2F1	GGCGGGAA	115	138	111	34	26	40	0.0129835	3.52838	-3.5154	-0.0379382	-3.56632	0.0509217
chr1_38042230_38042478_FOSL1_MA0477.1_center127_to_EGR1_C2H2_1	chr1_38042230_38042478	GGCCTCCCAAAGTGCTGGGATTACAGGCGTGAGCCACTGTGCCGAGCCTTCTTTTATTTCTTGACCTACATACTTTTAACCTTAACACATACAAGGATAATTTCACTTGCATGACTGAGGAACGCCCACGCATCTGATTTATTAATAAGCATATGTATCCAGCTTACTCAGATTATGTAGGTGGTGTGTATCTAGGCTTCAGATCAAGTTGTATCAACAGTTTTGCACTGTATTCTTGATATTAACAAA	-	chr1_38042230_38042478_FOSL1_MA0477.1_center127	AP-1	AATGACTCACC	127	EGR1	ACGCCCACGCA	59	63	62	37	24	39	0.998273	3.52838	-2.53011	-0.0379382	-3.56632	1.03621
chr1_38042230_38042478_FOSL1_MA0477.1_center127_to_ETS1_HUMAN.H11MO.0.A	chr1_38042230_38042478	GGCCTCCCAAAGTGCTGGGATTACAGGCGTGAGCCACTGTGCCGAGCCTTCTTTTATTTCTTGACCTACATACTTTTAACCTTAACACATACAAGGATAATTTCACTTGCATGACTGAGGAAACCGGAAGTCTCTGATTTATTAATAAGCATATGTATCCAGCTTACTCAGATTATGTAGGTGGTGTGTATCTAGGCTTCAGATCAAGTTGTATCAACAGTTTTGCACTGTATTCTTGATATTAACAAA	-	chr1_38042230_38042478_FOSL1_MA0477.1_center127	AP-1	ATGACTCAC	127	ETS	ACCGGAAGT	157	157	138	90	89	116	1.28252	3.52838	-2.24586	-0.0379382	-3.56632	1.32046
chr1_38042230_38042478_FOSL1_MA0477.1_center127_to_MECP2_HUMAN.H11MO.0.C	chr1_38042230_38042478	GGCCTCCCAAAGTGCTGGGATTACAGGCGTGAGCCACTGTGCCGAGCCTTCTTTTATTTCTTGACCTACATACTTTTAACCTTAACACATACAAGGATAATTTCACTTGCATGACTGAGGAAACCCGGAGCCTCTGATTTATTAATAAGCATATGTATCCAGCTTACTCAGATTATGTAGGTGGTGTGTATCTAGGCTTCAGATCAAGTTGTATCAACAGTTTTGCACTGTATTCTTGATATTAACAAA	-	chr1_38042230_38042478_FOSL1_MA0477.1_center127	AP-1	TGACTCA	127	MECP2	CCCGGAG	132	133	116	45	34	68	0.474331	3.52838	-3.05405	-0.0379382	-3.56632	0.512269
chr1_38042230_38042478_FOSL1_MA0477.1_center127_to_TP53_MA0106.3	chr1_38042230_38042478	GGCCTCCCAAAGTGCTGGGATTACAGGCGTGAGCCACTGTGCCGAGCCTTCTTTTATTTCTTGACCTACATACTTTTAACCTTAACACATACAAGGATAATTTCACTTGCATGACTGAGACATGCCCGGGCATGTGATTTATTAATAAGCATATGTATCCAGCTTACTCAGATTATGTAGGTGGTGTGTATCTAGGCTTCAGATCAAGTTGTATCAACAGTTTTGCACTGTATTCTTGATATTAACAAA	-	chr1_38042230_38042478_FOSL1_MA0477.1_center127	AP-1	GAAATGACTCACCTCT	127	P53	ACATGCCCGGGCATGT	38	39	54	72	59	118	2.77395	3.52838	-0.754427	-0.0379382	-3.56632	2.81189
chr1_38331110_38331358_EGR1_C2H2_1_center145_to_CREB1_MA0018.3	chr1_38331110_38331358	CCTCAAGTGCAGCATCTCAGAAACTGAACACCTTATCTTTCCTTCTCAAACCTGCTCTTTCTCTTATGTCTTTGTTTCTTTTAATGGCATCACCCTTAATTCCAGTGAGTCAACCCCGAAACCTGAGTCATTTCTGACTCCTGACGTCACTTGCCTCCCATGTGCCCAGTCTCGTTGATCTATCACCCATCCTCTCTCTTCCATTCTCATTGCACTTAGCTTGGTTCAGTGCCCTGCATTCACGATCTC	-	chr1_38331110_38331358_EGR1_C2H2_1_center145	EGR1	ACCCTCTC	145	CREB1	TGACGTCA	670	707	680	2395	2410	1324	3.61672	2.83541	0.781307	1.66967	-1.16574	1.94705
chr1_38331110_38331358_EGR1_C2H2_1_center145_to_E2F1_HUMAN.H11MO.0.A	chr1_38331110_38331358	CCTCAAGTGCAGCATCTCAGAAACTGAACACCTTATCTTTCCTTCTCAAACCTGCTCTTTCTCTTATGTCTTTGTTTCTTTTAATGGCATCACCCTTAATTCCAGTGAGTCAACCCCGAAACCTGAGTCATTTCTGACTCCGGCGGGAACTTGCCTCCCATGTGCCCAGTCTCGTTGATCTATCACCCATCCTCTCTCTTCCATTCTCATTGCACTTAGCTTGGTTCAGTGCCCTGCATTCACGATCTC	-	chr1_38331110_38331358_EGR1_C2H2_1_center145	EGR1	ACCCTCTC	145	E2F1	GGCGGGAA	987	1032	1062	1193	1124	868	2.04653	2.83541	-0.788884	1.66967	-1.16574	0.376856
chr1_38331110_38331358_EGR1_C2H2_1_center145_to_ETS1_HUMAN.H11MO.0.A	chr1_38331110_38331358	CCTCAAGTGCAGCATCTCAGAAACTGAACACCTTATCTTTCCTTCTCAAACCTGCTCTTTCTCTTATGTCTTTGTTTCTTTTAATGGCATCACCCTTAATTCCAGTGAGTCAACCCCGAAACCTGAGTCATTTCTGACTCACCGGAAGTCTTGCCTCCCATGTGCCCAGTCTCGTTGATCTATCACCCATCCTCTCTCTTCCATTCTCATTGCACTTAGCTTGGTTCAGTGCCCTGCATTCACGATCTC	-	chr1_38331110_38331358_EGR1_C2H2_1_center145	EGR1	CACCCTCTC	145	ETS	ACCGGAAGT	600	623	625	4296	3969	3190	4.62625	2.83541	1.79084	1.66967	-1.16574	2.95658
chr1_38331110_38331358_EGR1_C2H2_1_center145_to_FOSL1_MA0477.1	chr1_38331110_38331358	CCTCAAGTGCAGCATCTCAGAAACTGAACACCTTATCTTTCCTTCTCAAACCTGCTCTTTCTCTTATGTCTTTGTTTCTTTTAATGGCATCACCCTTAATTCCAGTGAGTCAACCCCGAAACCTGAGTCATTTCTGACTCGTGACTCATCTTGCCTCCCATGTGCCCAGTCTCGTTGATCTATCACCCATCCTCTCTCTTCCATTCTCATTGCACTTAGCTTGGTTCAGTGCCCTGCATTCACGATCTC	-	chr1_38331110_38331358_EGR1_C2H2_1_center145	EGR1	CACCCTCTC	145	AP-1	GTGACTCAT	824	851	795	4000	3740	2418	4.0626	2.83541	1.22719	1.66967	-1.16574	2.39293
chr1_38331110_38331358_EGR1_C2H2_1_center145_to_MAFK_MA0496.2	chr1_38331110_38331358	CCTCAAGTGCAGCATCTCAGAAACTGAACACCTTATCTTTCCTTCTCAAACCTGCTCTTTCTCTTATGTCTTTGTTTCTTTTAATGGCATCACCCTTAATTCCAGTGAGTCAACCCCGAAACCTGAGTCATTTCTGACTGCTGAGTCAGCATGCCTCCCATGTGCCCAGTCTCGTTGATCTATCACCCATCCTCTCTCTTCCATTCTCATTGCACTTAGCTTGGTTCAGTGCCCTGCATTCACGATCTC	-	chr1_38331110_38331358_EGR1_C2H2_1_center145	EGR1	TCCACCCTCTCCT	145	MAF	TGCTGAGTCAGCA	795	760	785	2118	2036	1184	3.22406	2.83541	0.388646	1.66967	-1.16574	1.55439
chr1_38331110_38331358_EGR1_C2H2_1_center145_to_TP53_MA0106.3	chr1_38331110_38331358	CCTCAAGTGCAGCATCTCAGAAACTGAACACCTTATCTTTCCTTCTCAAACCTGCTCTTTCTCTTATGTCTTTGTTTCTTTTAATGGCATCACCCTTAATTCCAGTGAGTCAACCCCGAAACCTGAGTCATTTCTGAACATGCCCGGGCATGTCCTCCCATGTGCCCAGTCTCGTTGATCTATCACCCATCCTCTCTCTTCCATTCTCATTGCACTTAGCTTGGTTCAGTGCCCTGCATTCACGATCTC	-	chr1_38331110_38331358_EGR1_C2H2_1_center145	EGR1	CTCCACCCTCTCCTTG	145	P53	ACATGCCCGGGCATGT	1642	1732	1793	8408	7249	8479	4.16321	2.83541	1.3278	1.66967	-1.16574	2.49354
chr1_38331110_38331358_FOSL1_MA0477.1_center109_to_CREB1_MA0018.3	chr1_38331110_38331358	CCTCAAGTGCAGCATCTCAGAAACTGAACACCTTATCTTTCCTTCTCAAACCTGCTCTTTCTCTTATGTCTTTGTTTCTTTTAATGGCATCACCCTTAATTCCAGTGACGTCACCCCGAAACCTGAGTCATTTCTGACTCCACCCTCTCCTTGCCTCCCATGTGCCCAGTCTCGTTGATCTATCACCCATCCTCTCTCTTCCATTCTCATTGCACTTAGCTTGGTTCAGTGCCCTGCATTCACGATCTC	-	chr1_38331110_38331358_FOSL1_MA0477.1_center109	AP-1	TGAGTCAA	109	CREB1	TGACGTCA	754	782	802	1642	1525	918	2.83709	2.83541	0.00168175	0.0912055	-2.74421	2.74589
chr1_38331110_38331358_FOSL1_MA0477.1_center109_to_E2F1_HUMAN.H11MO.0.A	chr1_38331110_38331358	CCTCAAGTGCAGCATCTCAGAAACTGAACACCTTATCTTTCCTTCTCAAACCTGCTCTTTCTCTTATGTCTTTGTTTCTTTTAATGGCATCACCCTTAATTCCAGGGCGGGAACCCCGAAACCTGAGTCATTTCTGACTCCACCCTCTCCTTGCCTCCCATGTGCCCAGTCTCGTTGATCTATCACCCATCCTCTCTCTTCCATTCTCATTGCACTTAGCTTGGTTCAGTGCCCTGCATTCACGATCTC	-	chr1_38331110_38331358_FOSL1_MA0477.1_center109	AP-1	TGAGTCAA	109	E2F1	GGCGGGAA	1213	1246	1304	724	631	705	1.07474	2.83541	-1.76067	0.0912055	-2.74421	0.983538
chr1_38331110_38331358_FOSL1_MA0477.1_center109_to_EGR1_C2H2_1	chr1_38331110_38331358	CCTCAAGTGCAGCATCTCAGAAACTGAACACCTTATCTTTCCTTCTCAAACCTGCTCTTTCTCTTATGTCTTTGTTTCTTTTAATGGCATCACCCTTAATTCCACGCCCACGCACCCGAAACCTGAGTCATTTCTGACTCCACCCTCTCCTTGCCTCCCATGTGCCCAGTCTCGTTGATCTATCACCCATCCTCTCTCTTCCATTCTCATTGCACTTAGCTTGGTTCAGTGCCCTGCATTCACGATCTC	-	chr1_38331110_38331358_FOSL1_MA0477.1_center109	AP-1	AGTGAGTCAAC	109	EGR1	ACGCCCACGCA	2089	2145	2137	3142	2839	2031	2.34131	2.83541	-0.494098	0.0912055	-2.74421	2.25011
chr1_38331110_38331358_FOSL1_MA0477.1_center109_to_ETS1_HUMAN.H11MO.0.A	chr1_38331110_38331358	CCTCAAGTGCAGCATCTCAGAAACTGAACACCTTATCTTTCCTTCTCAAACCTGCTCTTTCTCTTATGTCTTTGTTTCTTTTAATGGCATCACCCTTAATTCCAACCGGAAGTCCCCGAAACCTGAGTCATTTCTGACTCCACCCTCTCCTTGCCTCCCATGTGCCCAGTCTCGTTGATCTATCACCCATCCTCTCTCTTCCATTCTCATTGCACTTAGCTTGGTTCAGTGCCCTGCATTCACGATCTC	-	chr1_38331110_38331358_FOSL1_MA0477.1_center109	AP-1	GTGAGTCAA	109	ETS	ACCGGAAGT	683	738	725	667	579	631	1.75513	2.83541	-1.08029	0.0912055	-2.74421	1.66392
chr1_38331110_38331358_FOSL1_MA0477.1_center109_to_MECP2_HUMAN.H11MO.0.C	chr1_38331110_38331358	CCTCAAGTGCAGCATCTCAGAAACTGAACACCTTATCTTTCCTTCTCAAACCTGCTCTTTCTCTTATGTCTTTGTTTCTTTTAATGGCATCACCCTTAATTCCAGCCCGGAGACCCCGAAACCTGAGTCATTTCTGACTCCACCCTCTCCTTGCCTCCCATGTGCCCAGTCTCGTTGATCTATCACCCATCCTCTCTCTTCCATTCTCATTGCACTTAGCTTGGTTCAGTGCCCTGCATTCACGATCTC	-	chr1_38331110_38331358_FOSL1_MA0477.1_center109	AP-1	TGAGTCA	109	MECP2	CCCGGAG	872	990	989	265	219	326	0.081303	2.83541	-2.75411	0.0912055	-2.74421	-0.00990253
chr1_38331110_38331358_FOSL1_MA0477.1_center109_to_TP53_MA0106.3	chr1_38331110_38331358	CCTCAAGTGCAGCATCTCAGAAACTGAACACCTTATCTTTCCTTCTCAAACCTGCTCTTTCTCTTATGTCTTTGTTTCTTTTAATGGCATCACCCTTAATTACATGCCCGGGCATGTGAAACCTGAGTCATTTCTGACTCCACCCTCTCCTTGCCTCCCATGTGCCCAGTCTCGTTGATCTATCACCCATCCTCTCTCTTCCATTCTCATTGCACTTAGCTTGGTTCAGTGCCCTGCATTCACGATCTC	-	chr1_38331110_38331358_FOSL1_MA0477.1_center109	AP-1	CCAGTGAGTCAACCCC	109	P53	ACATGCCCGGGCATGT	745	811	796	1979	1588	2466	3.25234	2.83541	0.416928	0.0912055	-2.74421	3.16113
chr1_39649492_39649740_CREB1_MA0018.3_center166_to_E2F1_HUMAN.H11MO.0.A	chr1_39649492_39649740	GGGAGGTATAGCGAGAGTAGCTGCAGAAACCTCTGGGTGGCACCCTGCCCCCACAGGATTACCAAAGAATGACATGTGTGGAAGAGGCTCAGGCCTGTGTTGGCAGGAAGAAGTGACTCATTTTTCATCAAAGGAATTTCAAAGAACATATAATGACAGGATGGCGGGAAAGGAGCAGGTGGAGACAGGAACCTTGATTGAGCTGCTGGAAGATATTAAATGGTGTGGCTGCCTGGGCAGTCAGAATGA	+	chr1_39649492_39649740_CREB1_MA0018.3_center166	CREB1	GATGTCAC	166	E2F1	GGCGGGAA	81	96	103	67	55	61	1.31444	3.40215	-2.0877	1.25429	-2.14785	0.0601468
chr1_39649492_39649740_CREB1_MA0018.3_center166_to_EGR1_C2H2_1	chr1_39649492_39649740	GGGAGGTATAGCGAGAGTAGCTGCAGAAACCTCTGGGTGGCACCCTGCCCCCACAGGATTACCAAAGAATGACATGTGTGGAAGAGGCTCAGGCCTGTGTTGGCAGGAAGAAGTGACTCATTTTTCATCAAAGGAATTTCAAAGAACATATAATGACAGGACGCCCACGCAGGAGCAGGTGGAGACAGGAACCTTGATTGAGCTGCTGGAAGATATTAAATGGTGTGGCTGCCTGGGCAGTCAGAATGA	+	chr1_39649492_39649740_CREB1_MA0018.3_center166	CREB1	ATGATGTCACA	166	EGR1	ACGCCCACGCA	145	126	125	234	188	169	2.54977	3.40215	-0.852373	1.25429	-2.14785	1.29548
chr1_39649492_39649740_CREB1_MA0018.3_center166_to_ETS1_HUMAN.H11MO.0.A	chr1_39649492_39649740	GGGAGGTATAGCGAGAGTAGCTGCAGAAACCTCTGGGTGGCACCCTGCCCCCACAGGATTACCAAAGAATGACATGTGTGGAAGAGGCTCAGGCCTGTGTTGGCAGGAAGAAGTGACTCATTTTTCATCAAAGGAATTTCAAAGAACATATAATGACAGGAACCGGAAGTAGGAGCAGGTGGAGACAGGAACCTTGATTGAGCTGCTGGAAGATATTAAATGGTGTGGCTGCCTGGGCAGTCAGAATGA	+	chr1_39649492_39649740_CREB1_MA0018.3_center166	CREB1	TGATGTCAC	166	ETS	ACCGGAAGT	120	121	109	324	299	213	3.26014	3.40215	-0.142005	1.25429	-2.14785	2.00585
chr1_39649492_39649740_CREB1_MA0018.3_center166_to_FOSL1_MA0477.1	chr1_39649492_39649740	GGGAGGTATAGCGAGAGTAGCTGCAGAAACCTCTGGGTGGCACCCTGCCCCCACAGGATTACCAAAGAATGACATGTGTGGAAGAGGCTCAGGCCTGTGTTGGCAGGAAGAAGTGACTCATTTTTCATCAAAGGAATTTCAAAGAACATATAATGACAGGAGTGACTCATAGGAGCAGGTGGAGACAGGAACCTTGATTGAGCTGCTGGAAGATATTAAATGGTGTGGCTGCCTGGGCAGTCAGAATGA	+	chr1_39649492_39649740_CREB1_MA0018.3_center166	CREB1	TGATGTCAC	166	AP-1	GTGACTCAT	126	111	111	294	303	183	3.18539	3.40215	-0.216755	1.25429	-2.14785	1.9311
chr1_39649492_39649740_CREB1_MA0018.3_center166_to_MAFK_MA0496.2	chr1_39649492_39649740	GGGAGGTATAGCGAGAGTAGCTGCAGAAACCTCTGGGTGGCACCCTGCCCCCACAGGATTACCAAAGAATGACATGTGTGGAAGAGGCTCAGGCCTGTGTTGGCAGGAAGAAGTGACTCATTTTTCATCAAAGGAATTTCAAAGAACATATAATGACAGTGCTGAGTCAGCAGAGCAGGTGGAGACAGGAACCTTGATTGAGCTGCTGGAAGATATTAAATGGTGTGGCTGCCTGGGCAGTCAGAATGA	+	chr1_39649492_39649740_CREB1_MA0018.3_center166	CREB1	GATGATGTCACAG	166	MAF	TGCTGAGTCAGCA	163	189	171	272	232	154	2.34772	3.40215	-1.05442	1.25429	-2.14785	1.09343
chr1_39649492_39649740_CREB1_MA0018.3_center166_to_MECP2_HUMAN.H11MO.0.C	chr1_39649492_39649740	GGGAGGTATAGCGAGAGTAGCTGCAGAAACCTCTGGGTGGCACCCTGCCCCCACAGGATTACCAAAGAATGACATGTGTGGAAGAGGCTCAGGCCTGTGTTGGCAGGAAGAAGTGACTCATTTTTCATCAAAGGAATTTCAAAGAACATATAATGACAGGATCCCGGAGCAGGAGCAGGTGGAGACAGGAACCTTGATTGAGCTGCTGGAAGATATTAAATGGTGTGGCTGCCTGGGCAGTCAGAATGA	+	chr1_39649492_39649740_CREB1_MA0018.3_center166	CREB1	GATGTCA	166	MECP2	CCCGGAG	263	280	269	231	198	168	1.53732	3.40215	-1.86482	1.25429	-2.14785	0.283028
chr1_39649492_39649740_CREB1_MA0018.3_center166_to_TP53_MA0106.3	chr1_39649492_39649740	GGGAGGTATAGCGAGAGTAGCTGCAGAAACCTCTGGGTGGCACCCTGCCCCCACAGGATTACCAAAGAATGACATGTGTGGAAGAGGCTCAGGCCTGTGTTGGCAGGAAGAAGTGACTCATTTTTCATCAAAGGAATTTCAAAGAACATATAATGACAACATGCCCGGGCATGTGCAGGTGGAGACAGGAACCTTGATTGAGCTGCTGGAAGATATTAAATGGTGTGGCTGCCTGGGCAGTCAGAATGA	+	chr1_39649492_39649740_CREB1_MA0018.3_center166	CREB1	GGATGATGTCACAGGA	166	P53	ACATGCCCGGGCATGT	189	190	212	842	738	1027	4.04792	3.40215	0.645771	1.25429	-2.14785	2.79362
chr1_39649492_39649740_E2F1_HUMAN.H11MO.0.A_center105_to_CREB1_MA0018.3	chr1_39649492_39649740	GGGAGGTATAGCGAGAGTAGCTGCAGAAACCTCTGGGTGGCACCCTGCCCCCACAGGATTACCAAAGAATGACATGTGTGGAAGAGGCTCAGGCCTGTGTTTGACGTCAGAAGTGACTCATTTTTCATCAAAGGAATTTCAAAGAACATATAATGACAGGATGATGTCACAGGAGCAGGTGGAGACAGGAACCTTGATTGAGCTGCTGGAAGATATTAAATGGTGTGGCTGCCTGGGCAGTCAGAATGA	+	chr1_39649492_39649740_E2F1_HUMAN.H11MO.0.A_center105	E2F1	GGCAGGAA	105	CREB1	TGACGTCA	333	458	397	482	576	286	2.23052	3.40215	-1.17163	1.1178	-2.28434	1.11272
chr1_39649492_39649740_E2F1_HUMAN.H11MO.0.A_center105_to_EGR1_C2H2_1	chr1_39649492_39649740	GGGAGGTATAGCGAGAGTAGCTGCAGAAACCTCTGGGTGGCACCCTGCCCCCACAGGATTACCAAAGAATGACATGTGTGGAAGAGGCTCAGGCCTGTGACGCCCACGCAAAGTGACTCATTTTTCATCAAAGGAATTTCAAAGAACATATAATGACAGGATGATGTCACAGGAGCAGGTGGAGACAGGAACCTTGATTGAGCTGCTGGAAGATATTAAATGGTGTGGCTGCCTGGGCAGTCAGAATGA	+	chr1_39649492_39649740_E2F1_HUMAN.H11MO.0.A_center105	E2F1	TTGGCAGGAAG	105	EGR1	ACGCCCACGCA	203	208	194	610	572	451	3.42544	3.40215	0.0232939	1.1178	-2.28434	2.30764
chr1_39649492_39649740_E2F1_HUMAN.H11MO.0.A_center105_to_ETS1_HUMAN.H11MO.0.A	chr1_39649492_39649740	GGGAGGTATAGCGAGAGTAGCTGCAGAAACCTCTGGGTGGCACCCTGCCCCCACAGGATTACCAAAGAATGACATGTGTGGAAGAGGCTCAGGCCTGTGTACCGGAAGTGAAGTGACTCATTTTTCATCAAAGGAATTTCAAAGAACATATAATGACAGGATGATGTCACAGGAGCAGGTGGAGACAGGAACCTTGATTGAGCTGCTGGAAGATATTAAATGGTGTGGCTGCCTGGGCAGTCAGAATGA	+	chr1_39649492_39649740_E2F1_HUMAN.H11MO.0.A_center105	E2F1	TGGCAGGAA	105	ETS	ACCGGAAGT	183	161	162	700	696	398	3.85807	3.40215	0.455929	1.1178	-2.28434	2.74027
chr1_39649492_39649740_E2F1_HUMAN.H11MO.0.A_center105_to_FOSL1_MA0477.1	chr1_39649492_39649740	GGGAGGTATAGCGAGAGTAGCTGCAGAAACCTCTGGGTGGCACCCTGCCCCCACAGGATTACCAAAGAATGACATGTGTGGAAGAGGCTCAGGCCTGTGTGTGACTCATGAAGTGACTCATTTTTCATCAAAGGAATTTCAAAGAACATATAATGACAGGATGATGTCACAGGAGCAGGTGGAGACAGGAACCTTGATTGAGCTGCTGGAAGATATTAAATGGTGTGGCTGCCTGGGCAGTCAGAATGA	+	chr1_39649492_39649740_E2F1_HUMAN.H11MO.0.A_center105	E2F1	TGGCAGGAA	105	AP-1	GTGACTCAT	132	142	175	768	755	440	4.16465	3.40215	0.762503	1.1178	-2.28434	3.04685
chr1_39649492_39649740_E2F1_HUMAN.H11MO.0.A_center105_to_MAFK_MA0496.2	chr1_39649492_39649740	GGGAGGTATAGCGAGAGTAGCTGCAGAAACCTCTGGGTGGCACCCTGCCCCCACAGGATTACCAAAGAATGACATGTGTGGAAGAGGCTCAGGCCTGTTGCTGAGTCAGCAAGTGACTCATTTTTCATCAAAGGAATTTCAAAGAACATATAATGACAGGATGATGTCACAGGAGCAGGTGGAGACAGGAACCTTGATTGAGCTGCTGGAAGATATTAAATGGTGTGGCTGCCTGGGCAGTCAGAATGA	+	chr1_39649492_39649740_E2F1_HUMAN.H11MO.0.A_center105	E2F1	GTTGGCAGGAAGA	105	MAF	TGCTGAGTCAGCA	57	68	65	207	183	128	3.45437	3.40215	0.0522207	1.1178	-2.28434	2.33656
chr1_39649492_39649740_E2F1_HUMAN.H11MO.0.A_center105_to_MECP2_HUMAN.H11MO.0.C	chr1_39649492_39649740	GGGAGGTATAGCGAGAGTAGCTGCAGAAACCTCTGGGTGGCACCCTGCCCCCACAGGATTACCAAAGAATGACATGTGTGGAAGAGGCTCAGGCCTGTGTTCCCGGAGAGAAGTGACTCATTTTTCATCAAAGGAATTTCAAAGAACATATAATGACAGGATGATGTCACAGGAGCAGGTGGAGACAGGAACCTTGATTGAGCTGCTGGAAGATATTAAATGGTGTGGCTGCCTGGGCAGTCAGAATGA	+	chr1_39649492_39649740_E2F1_HUMAN.H11MO.0.A_center105	E2F1	GGCAGGA	105	MECP2	CCCGGAG	244	268	264	226	268	162	1.77819	3.40215	-1.62396	1.1178	-2.28434	0.660383
chr1_39649492_39649740_E2F1_HUMAN.H11MO.0.A_center105_to_TP53_MA0106.3	chr1_39649492_39649740	GGGAGGTATAGCGAGAGTAGCTGCAGAAACCTCTGGGTGGCACCCTGCCCCCACAGGATTACCAAAGAATGACATGTGTGGAAGAGGCTCAGGCCTGACATGCCCGGGCATGTTGACTCATTTTTCATCAAAGGAATTTCAAAGAACATATAATGACAGGATGATGTCACAGGAGCAGGTGGAGACAGGAACCTTGATTGAGCTGCTGGAAGATATTAAATGGTGTGGCTGCCTGGGCAGTCAGAATGA	+	chr1_39649492_39649740_E2F1_HUMAN.H11MO.0.A_center105	E2F1	TGTTGGCAGGAAGAAG	105	P53	ACATGCCCGGGCATGT	283	325	306	1127	955	1503	3.85929	3.40215	0.45714	1.1178	-2.28434	2.74148
chr1_39649492_39649740_ETS1_HUMAN.H11MO.0.A_center107_to_CREB1_MA0018.3	chr1_39649492_39649740	GGGAGGTATAGCGAGAGTAGCTGCAGAAACCTCTGGGTGGCACCCTGCCCCCACAGGATTACCAAAGAATGACATGTGTGGAAGAGGCTCAGGCCTGTGTTGGTGACGTCAAGTGACTCATTTTTCATCAAAGGAATTTCAAAGAACATATAATGACAGGATGATGTCACAGGAGCAGGTGGAGACAGGAACCTTGATTGAGCTGCTGGAAGATATTAAATGGTGTGGCTGCCTGGGCAGTCAGAATGA	+	chr1_39649492_39649740_ETS1_HUMAN.H11MO.0.A_center107	ETS	CAGGAAGA	107	CREB1	TGACGTCA	144	139	149	187	200	111	2.23456	3.40215	-1.16759	1.7594	-1.64275	0.475162
chr1_39649492_39649740_ETS1_HUMAN.H11MO.0.A_center107_to_E2F1_HUMAN.H11MO.0.A	chr1_39649492_39649740	GGGAGGTATAGCGAGAGTAGCTGCAGAAACCTCTGGGTGGCACCCTGCCCCCACAGGATTACCAAAGAATGACATGTGTGGAAGAGGCTCAGGCCTGTGTTGGGGCGGGAAAGTGACTCATTTTTCATCAAAGGAATTTCAAAGAACATATAATGACAGGATGATGTCACAGGAGCAGGTGGAGACAGGAACCTTGATTGAGCTGCTGGAAGATATTAAATGGTGTGGCTGCCTGGGCAGTCAGAATGA	+	chr1_39649492_39649740_ETS1_HUMAN.H11MO.0.A_center107	ETS	CAGGAAGA	107	E2F1	GGCGGGAA	118	117	106	123	119	85	1.93147	3.40215	-1.47067	1.7594	-1.64275	0.172078
chr1_39649492_39649740_ETS1_HUMAN.H11MO.0.A_center107_to_EGR1_C2H2_1	chr1_39649492_39649740	GGGAGGTATAGCGAGAGTAGCTGCAGAAACCTCTGGGTGGCACCCTGCCCCCACAGGATTACCAAAGAATGACATGTGTGGAAGAGGCTCAGGCCTGTGTTACGCCCACGCAGTGACTCATTTTTCATCAAAGGAATTTCAAAGAACATATAATGACAGGATGATGTCACAGGAGCAGGTGGAGACAGGAACCTTGATTGAGCTGCTGGAAGATATTAAATGGTGTGGCTGCCTGGGCAGTCAGAATGA	+	chr1_39649492_39649740_ETS1_HUMAN.H11MO.0.A_center107	ETS	GGCAGGAAGAA	107	EGR1	ACGCCCACGCA	180	198	187	478	426	273	3.08135	3.40215	-0.3208	1.7594	-1.64275	1.32195
chr1_39649492_39649740_ETS1_HUMAN.H11MO.0.A_center107_to_FOSL1_MA0477.1	chr1_39649492_39649740	GGGAGGTATAGCGAGAGTAGCTGCAGAAACCTCTGGGTGGCACCCTGCCCCCACAGGATTACCAAAGAATGACATGTGTGGAAGAGGCTCAGGCCTGTGTTGGTGACTCATAGTGACTCATTTTTCATCAAAGGAATTTCAAAGAACATATAATGACAGGATGATGTCACAGGAGCAGGTGGAGACAGGAACCTTGATTGAGCTGCTGGAAGATATTAAATGGTGTGGCTGCCTGGGCAGTCAGAATGA	+	chr1_39649492_39649740_ETS1_HUMAN.H11MO.0.A_center107	ETS	GCAGGAAGA	107	AP-1	GTGACTCAT	78	82	71	428	425	280	4.30877	3.40215	0.90662	1.7594	-1.64275	2.54937
chr1_39649492_39649740_ETS1_HUMAN.H11MO.0.A_center107_to_MAFK_MA0496.2	chr1_39649492_39649740	GGGAGGTATAGCGAGAGTAGCTGCAGAAACCTCTGGGTGGCACCCTGCCCCCACAGGATTACCAAAGAATGACATGTGTGGAAGAGGCTCAGGCCTGTGTTGCTGAGTCAGCATGACTCATTTTTCATCAAAGGAATTTCAAAGAACATATAATGACAGGATGATGTCACAGGAGCAGGTGGAGACAGGAACCTTGATTGAGCTGCTGGAAGATATTAAATGGTGTGGCTGCCTGGGCAGTCAGAATGA	+	chr1_39649492_39649740_ETS1_HUMAN.H11MO.0.A_center107	ETS	TGGCAGGAAGAAG	107	MAF	TGCTGAGTCAGCA	303	337	369	1256	1302	846	3.77606	3.40215	0.373912	1.7594	-1.64275	2.01666
chr1_39649492_39649740_ETS1_HUMAN.H11MO.0.A_center107_to_MECP2_HUMAN.H11MO.0.C	chr1_39649492_39649740	GGGAGGTATAGCGAGAGTAGCTGCAGAAACCTCTGGGTGGCACCCTGCCCCCACAGGATTACCAAAGAATGACATGTGTGGAAGAGGCTCAGGCCTGTGTTGGCCCGGAGAAGTGACTCATTTTTCATCAAAGGAATTTCAAAGAACATATAATGACAGGATGATGTCACAGGAGCAGGTGGAGACAGGAACCTTGATTGAGCTGCTGGAAGATATTAAATGGTGTGGCTGCCTGGGCAGTCAGAATGA	+	chr1_39649492_39649740_ETS1_HUMAN.H11MO.0.A_center107	ETS	CAGGAAG	107	MECP2	CCCGGAG	137	153	149	165	206	123	2.18888	3.40215	-1.21327	1.7594	-1.64275	0.42948
chr1_39649492_39649740_ETS1_HUMAN.H11MO.0.A_center107_to_TP53_MA0106.3	chr1_39649492_39649740	GGGAGGTATAGCGAGAGTAGCTGCAGAAACCTCTGGGTGGCACCCTGCCCCCACAGGATTACCAAAGAATGACATGTGTGGAAGAGGCTCAGGCCTGTGACATGCCCGGGCATGTACTCATTTTTCATCAAAGGAATTTCAAAGAACATATAATGACAGGATGATGTCACAGGAGCAGGTGGAGACAGGAACCTTGATTGAGCTGCTGGAAGATATTAAATGGTGTGGCTGCCTGGGCAGTCAGAATGA	+	chr1_39649492_39649740_ETS1_HUMAN.H11MO.0.A_center107	ETS	TTGGCAGGAAGAAGTG	107	P53	ACATGCCCGGGCATGT	185	178	179	716	601	991	3.96707	3.40215	0.564924	1.7594	-1.64275	2.20767
chr1_39649492_39649740_ETS1_HUMAN.H11MO.0.A_center160_to_CREB1_MA0018.3	chr1_39649492_39649740	GGGAGGTATAGCGAGAGTAGCTGCAGAAACCTCTGGGTGGCACCCTGCCCCCACAGGATTACCAAAGAATGACATGTGTGGAAGAGGCTCAGGCCTGTGTTGGCAGGAAGAAGTGACTCATTTTTCATCAAAGGAATTTCAAAGAACATATAATGATGACGTCATGTCACAGGAGCAGGTGGAGACAGGAACCTTGATTGAGCTGCTGGAAGATATTAAATGGTGTGGCTGCCTGGGCAGTCAGAATGA	+	chr1_39649492_39649740_ETS1_HUMAN.H11MO.0.A_center160	ETS	CAGGATGA	160	CREB1	TGACGTCA	138	175	159	417	374	268	3.17547	3.40215	-0.226674	1.58101	-1.82113	1.59446
chr1_39649492_39649740_ETS1_HUMAN.H11MO.0.A_center160_to_E2F1_HUMAN.H11MO.0.A	chr1_39649492_39649740	GGGAGGTATAGCGAGAGTAGCTGCAGAAACCTCTGGGTGGCACCCTGCCCCCACAGGATTACCAAAGAATGACATGTGTGGAAGAGGCTCAGGCCTGTGTTGGCAGGAAGAAGTGACTCATTTTTCATCAAAGGAATTTCAAAGAACATATAATGAGGCGGGAATGTCACAGGAGCAGGTGGAGACAGGAACCTTGATTGAGCTGCTGGAAGATATTAAATGGTGTGGCTGCCTGGGCAGTCAGAATGA	+	chr1_39649492_39649740_ETS1_HUMAN.H11MO.0.A_center160	ETS	CAGGATGA	160	E2F1	GGCGGGAA	119	104	127	149	126	137	2.17496	3.40215	-1.22719	1.58101	-1.82113	0.593943
chr1_39649492_39649740_ETS1_HUMAN.H11MO.0.A_center160_to_EGR1_C2H2_1	chr1_39649492_39649740	GGGAGGTATAGCGAGAGTAGCTGCAGAAACCTCTGGGTGGCACCCTGCCCCCACAGGATTACCAAAGAATGACATGTGTGGAAGAGGCTCAGGCCTGTGTTGGCAGGAAGAAGTGACTCATTTTTCATCAAAGGAATTTCAAAGAACATATAATACGCCCACGCAGTCACAGGAGCAGGTGGAGACAGGAACCTTGATTGAGCTGCTGGAAGATATTAAATGGTGTGGCTGCCTGGGCAGTCAGAATGA	+	chr1_39649492_39649740_ETS1_HUMAN.H11MO.0.A_center160	ETS	GACAGGATGAT	160	EGR1	ACGCCCACGCA	147	171	165	305	279	246	2.75804	3.40215	-0.644103	1.58101	-1.82113	1.17703
chr1_39649492_39649740_ETS1_HUMAN.H11MO.0.A_center160_to_FOSL1_MA0477.1	chr1_39649492_39649740	GGGAGGTATAGCGAGAGTAGCTGCAGAAACCTCTGGGTGGCACCCTGCCCCCACAGGATTACCAAAGAATGACATGTGTGGAAGAGGCTCAGGCCTGTGTTGGCAGGAAGAAGTGACTCATTTTTCATCAAAGGAATTTCAAAGAACATATAATGGTGACTCATTGTCACAGGAGCAGGTGGAGACAGGAACCTTGATTGAGCTGCTGGAAGATATTAAATGGTGTGGCTGCCTGGGCAGTCAGAATGA	+	chr1_39649492_39649740_ETS1_HUMAN.H11MO.0.A_center160	ETS	ACAGGATGA	160	AP-1	GTGACTCAT	69	62	83	345	290	275	4.05742	3.40215	0.655278	1.58101	-1.82113	2.47641
chr1_39649492_39649740_ETS1_HUMAN.H11MO.0.A_center160_to_MAFK_MA0496.2	chr1_39649492_39649740	GGGAGGTATAGCGAGAGTAGCTGCAGAAACCTCTGGGTGGCACCCTGCCCCCACAGGATTACCAAAGAATGACATGTGTGGAAGAGGCTCAGGCCTGTGTTGGCAGGAAGAAGTGACTCATTTTTCATCAAAGGAATTTCAAAGAACATATAATGCTGAGTCAGCATCACAGGAGCAGGTGGAGACAGGAACCTTGATTGAGCTGCTGGAAGATATTAAATGGTGTGGCTGCCTGGGCAGTCAGAATGA	+	chr1_39649492_39649740_ETS1_HUMAN.H11MO.0.A_center160	ETS	TGACAGGATGATG	160	MAF	TGCTGAGTCAGCA	136	139	134	342	311	272	3.15407	3.40215	-0.248073	1.58101	-1.82113	1.57306
chr1_39649492_39649740_ETS1_HUMAN.H11MO.0.A_center160_to_MECP2_HUMAN.H11MO.0.C	chr1_39649492_39649740	GGGAGGTATAGCGAGAGTAGCTGCAGAAACCTCTGGGTGGCACCCTGCCCCCACAGGATTACCAAAGAATGACATGTGTGGAAGAGGCTCAGGCCTGTGTTGGCAGGAAGAAGTGACTCATTTTTCATCAAAGGAATTTCAAAGAACATATAATGACCCGGAGATGTCACAGGAGCAGGTGGAGACAGGAACCTTGATTGAGCTGCTGGAAGATATTAAATGGTGTGGCTGCCTGGGCAGTCAGAATGA	+	chr1_39649492_39649740_ETS1_HUMAN.H11MO.0.A_center160	ETS	CAGGATG	160	MECP2	CCCGGAG	148	150	163	134	130	126	1.71011	3.40215	-1.69204	1.58101	-1.82113	0.129094
chr1_39649492_39649740_ETS1_HUMAN.H11MO.0.A_center160_to_TP53_MA0106.3	chr1_39649492_39649740	GGGAGGTATAGCGAGAGTAGCTGCAGAAACCTCTGGGTGGCACCCTGCCCCCACAGGATTACCAAAGAATGACATGTGTGGAAGAGGCTCAGGCCTGTGTTGGCAGGAAGAAGTGACTCATTTTTCATCAAAGGAATTTCAAAGAACATATAACATGCCCGGGCATGTACAGGAGCAGGTGGAGACAGGAACCTTGATTGAGCTGCTGGAAGATATTAAATGGTGTGGCTGCCTGGGCAGTCAGAATGA	+	chr1_39649492_39649740_ETS1_HUMAN.H11MO.0.A_center160	ETS	ATGACAGGATGATGTC	160	P53	ACATGCCCGGGCATGT	148	153	153	755	643	947	4.26643	3.40215	0.864283	1.58101	-1.82113	2.68541
chr1_41341444_41341692_EGR1_C2H2_1_center135_to_CREB1_MA0018.3	chr1_41341444_41341692	CTTCTTGCACATCTGTGGAAAGGGGAGTTTGCTTTGAACTGCATTTCCTCACCAGCGTCACCCATTCCTTAAGAGTCAGGTTGATAAACGAGTCAATGCTGAGCCCAAACCAGGCAGGATTAATCATTTCCTGACGTCAATTGCTGCTGCTGCTGCTGCTGCATCCTGTGTCTGAGTCATTTCCTCATCTTTAATAGCTAACATGATGCCCAGTACAAAATAGGTATGGGGGAATATTTACTGAATGAA	+	chr1_41341444_41341692_EGR1_C2H2_1_center135	EGR1	TCCTCCAC	135	CREB1	TGACGTCA	312	369	384	1680	1594	1173	4.07011	3.5213	0.548803	1.17209	-2.34921	2.89801
chr1_41341444_41341692_EGR1_C2H2_1_center135_to_E2F1_HUMAN.H11MO.0.A	chr1_41341444_41341692	CTTCTTGCACATCTGTGGAAAGGGGAGTTTGCTTTGAACTGCATTTCCTCACCAGCGTCACCCATTCCTTAAGAGTCAGGTTGATAAACGAGTCAATGCTGAGCCCAAACCAGGCAGGATTAATCATTTCCGGCGGGAAATTGCTGCTGCTGCTGCTGCTGCATCCTGTGTCTGAGTCATTTCCTCATCTTTAATAGCTAACATGATGCCCAGTACAAAATAGGTATGGGGGAATATTTACTGAATGAA	+	chr1_41341444_41341692_EGR1_C2H2_1_center135	EGR1	TCCTCCAC	135	E2F1	GGCGGGAA	145	128	158	749	654	540	4.16213	3.5213	0.640831	1.17209	-2.34921	2.99004
chr1_41341444_41341692_EGR1_C2H2_1_center135_to_ETS1_HUMAN.H11MO.0.A	chr1_41341444_41341692	CTTCTTGCACATCTGTGGAAAGGGGAGTTTGCTTTGAACTGCATTTCCTCACCAGCGTCACCCATTCCTTAAGAGTCAGGTTGATAAACGAGTCAATGCTGAGCCCAAACCAGGCAGGATTAATCATTTCACCGGAAGTATTGCTGCTGCTGCTGCTGCTGCATCCTGTGTCTGAGTCATTTCCTCATCTTTAATAGCTAACATGATGCCCAGTACAAAATAGGTATGGGGGAATATTTACTGAATGAA	+	chr1_41341444_41341692_EGR1_C2H2_1_center135	EGR1	CTCCTCCAC	135	ETS	ACCGGAAGT	56	71	66	177	129	113	3.10101	3.5213	-0.420298	1.17209	-2.34921	1.92891
chr1_41341444_41341692_EGR1_C2H2_1_center135_to_FOSL1_MA0477.1	chr1_41341444_41341692	CTTCTTGCACATCTGTGGAAAGGGGAGTTTGCTTTGAACTGCATTTCCTCACCAGCGTCACCCATTCCTTAAGAGTCAGGTTGATAAACGAGTCAATGCTGAGCCCAAACCAGGCAGGATTAATCATTTCGTGACTCATATTGCTGCTGCTGCTGCTGCTGCATCCTGTGTCTGAGTCATTTCCTCATCTTTAATAGCTAACATGATGCCCAGTACAAAATAGGTATGGGGGAATATTTACTGAATGAA	+	chr1_41341444_41341692_EGR1_C2H2_1_center135	EGR1	CTCCTCCAC	135	AP-1	GTGACTCAT	210	170	199	1342	1174	1039	4.59639	3.5213	1.07509	1.17209	-2.34921	3.4243
chr1_41341444_41341692_EGR1_C2H2_1_center135_to_MAFK_MA0496.2	chr1_41341444_41341692	CTTCTTGCACATCTGTGGAAAGGGGAGTTTGCTTTGAACTGCATTTCCTCACCAGCGTCACCCATTCCTTAAGAGTCAGGTTGATAAACGAGTCAATGCTGAGCCCAAACCAGGCAGGATTAATCATTTGCTGAGTCAGCATGCTGCTGCTGCTGCTGCTGCATCCTGTGTCTGAGTCATTTCCTCATCTTTAATAGCTAACATGATGCCCAGTACAAAATAGGTATGGGGGAATATTTACTGAATGAA	+	chr1_41341444_41341692_EGR1_C2H2_1_center135	EGR1	TCCTCCTCCACAT	135	MAF	TGCTGAGTCAGCA	337	327	329	867	760	532	3.13227	3.5213	-0.389032	1.17209	-2.34921	1.96018
chr1_41341444_41341692_EGR1_C2H2_1_center135_to_MECP2_HUMAN.H11MO.0.C	chr1_41341444_41341692	CTTCTTGCACATCTGTGGAAAGGGGAGTTTGCTTTGAACTGCATTTCCTCACCAGCGTCACCCATTCCTTAAGAGTCAGGTTGATAAACGAGTCAATGCTGAGCCCAAACCAGGCAGGATTAATCATTTCCCCCGGAGCATTGCTGCTGCTGCTGCTGCTGCATCCTGTGTCTGAGTCATTTCCTCATCTTTAATAGCTAACATGATGCCCAGTACAAAATAGGTATGGGGGAATATTTACTGAATGAA	+	chr1_41341444_41341692_EGR1_C2H2_1_center135	EGR1	TCCTCCA	135	MECP2	CCCGGAG	135	152	133	227	195	170	2.47235	3.5213	-1.04895	1.17209	-2.34921	1.30026
chr1_41341444_41341692_EGR1_C2H2_1_center135_to_TP53_MA0106.3	chr1_41341444_41341692	CTTCTTGCACATCTGTGGAAAGGGGAGTTTGCTTTGAACTGCATTTCCTCACCAGCGTCACCCATTCCTTAAGAGTCAGGTTGATAAACGAGTCAATGCTGAGCCCAAACCAGGCAGGATTAATCATACATGCCCGGGCATGTCTGCTGCTGCTGCTGCTGCATCCTGTGTCTGAGTCATTTCCTCATCTTTAATAGCTAACATGATGCCCAGTACAAAATAGGTATGGGGGAATATTTACTGAATGAA	+	chr1_41341444_41341692_EGR1_C2H2_1_center135	EGR1	TTCCTCCTCCACATTG	135	P53	ACATGCCCGGGCATGT	102	91	117	721	571	842	4.68519	3.5213	1.16389	1.17209	-2.34921	3.5131
chr1_41341444_41341692_ETS1_HUMAN.H11MO.0.A_center129_to_CREB1_MA0018.3	chr1_41341444_41341692	CTTCTTGCACATCTGTGGAAAGGGGAGTTTGCTTTGAACTGCATTTCCTCACCAGCGTCACCCATTCCTTAAGAGTCAGGTTGATAAACGAGTCAATGCTGAGCCCAAACCAGGCAGGATTAATCTGACGTCACTCCACATTGCTGCTGCTGCTGCTGCTGCATCCTGTGTCTGAGTCATTTCCTCATCTTTAATAGCTAACATGATGCCCAGTACAAAATAGGTATGGGGGAATATTTACTGAATGAA	+	chr1_41341444_41341692_ETS1_HUMAN.H11MO.0.A_center129	ETS	ATTTCCTC	129	CREB1	TGACGTCA	87	111	114	176	184	128	2.64984	3.5213	-0.871464	1.09022	-2.43108	1.55962
chr1_41341444_41341692_ETS1_HUMAN.H11MO.0.A_center129_to_E2F1_HUMAN.H11MO.0.A	chr1_41341444_41341692	CTTCTTGCACATCTGTGGAAAGGGGAGTTTGCTTTGAACTGCATTTCCTCACCAGCGTCACCCATTCCTTAAGAGTCAGGTTGATAAACGAGTCAATGCTGAGCCCAAACCAGGCAGGATTAATCGGCGGGAACTCCACATTGCTGCTGCTGCTGCTGCTGCATCCTGTGTCTGAGTCATTTCCTCATCTTTAATAGCTAACATGATGCCCAGTACAAAATAGGTATGGGGGAATATTTACTGAATGAA	+	chr1_41341444_41341692_ETS1_HUMAN.H11MO.0.A_center129	ETS	ATTTCCTC	129	E2F1	GGCGGGAA	164	180	174	96	72	149	1.1374	3.5213	-2.38391	1.09022	-2.43108	0.047173
chr1_41341444_41341692_ETS1_HUMAN.H11MO.0.A_center129_to_EGR1_C2H2_1	chr1_41341444_41341692	CTTCTTGCACATCTGTGGAAAGGGGAGTTTGCTTTGAACTGCATTTCCTCACCAGCGTCACCCATTCCTTAAGAGTCAGGTTGATAAACGAGTCAATGCTGAGCCCAAACCAGGCAGGATTAAACGCCCACGCATCCACATTGCTGCTGCTGCTGCTGCTGCATCCTGTGTCTGAGTCATTTCCTCATCTTTAATAGCTAACATGATGCCCAGTACAAAATAGGTATGGGGGAATATTTACTGAATGAA	+	chr1_41341444_41341692_ETS1_HUMAN.H11MO.0.A_center129	ETS	TCATTTCCTCC	129	EGR1	ACGCCCACGCA	139	144	110	374	293	263	3.21999	3.5213	-0.301311	1.09022	-2.43108	2.12977
chr1_41341444_41341692_ETS1_HUMAN.H11MO.0.A_center129_to_FOSL1_MA0477.1	chr1_41341444_41341692	CTTCTTGCACATCTGTGGAAAGGGGAGTTTGCTTTGAACTGCATTTCCTCACCAGCGTCACCCATTCCTTAAGAGTCAGGTTGATAAACGAGTCAATGCTGAGCCCAAACCAGGCAGGATTAATGTGACTCATCTCCACATTGCTGCTGCTGCTGCTGCTGCATCCTGTGTCTGAGTCATTTCCTCATCTTTAATAGCTAACATGATGCCCAGTACAAAATAGGTATGGGGGAATATTTACTGAATGAA	+	chr1_41341444_41341692_ETS1_HUMAN.H11MO.0.A_center129	ETS	CATTTCCTC	129	AP-1	GTGACTCAT	151	147	152	494	461	327	3.51749	3.5213	-0.00380855	1.09022	-2.43108	2.42727
chr1_41341444_41341692_ETS1_HUMAN.H11MO.0.A_center129_to_MAFK_MA0496.2	chr1_41341444_41341692	CTTCTTGCACATCTGTGGAAAGGGGAGTTTGCTTTGAACTGCATTTCCTCACCAGCGTCACCCATTCCTTAAGAGTCAGGTTGATAAACGAGTCAATGCTGAGCCCAAACCAGGCAGGATTATGCTGAGTCAGCACCACATTGCTGCTGCTGCTGCTGCTGCATCCTGTGTCTGAGTCATTTCCTCATCTTTAATAGCTAACATGATGCCCAGTACAAAATAGGTATGGGGGAATATTTACTGAATGAA	+	chr1_41341444_41341692_ETS1_HUMAN.H11MO.0.A_center129	ETS	ATCATTTCCTCCT	129	MAF	TGCTGAGTCAGCA	215	224	208	223	186	197	1.85375	3.5213	-1.66756	1.09022	-2.43108	0.763524
chr1_41341444_41341692_ETS1_HUMAN.H11MO.0.A_center129_to_MECP2_HUMAN.H11MO.0.C	chr1_41341444_41341692	CTTCTTGCACATCTGTGGAAAGGGGAGTTTGCTTTGAACTGCATTTCCTCACCAGCGTCACCCATTCCTTAAGAGTCAGGTTGATAAACGAGTCAATGCTGAGCCCAAACCAGGCAGGATTAATCCCCGGAGCCTCCACATTGCTGCTGCTGCTGCTGCTGCATCCTGTGTCTGAGTCATTTCCTCATCTTTAATAGCTAACATGATGCCCAGTACAAAATAGGTATGGGGGAATATTTACTGAATGAA	+	chr1_41341444_41341692_ETS1_HUMAN.H11MO.0.A_center129	ETS	ATTTCCT	129	MECP2	CCCGGAG	196	216	210	97	74	116	0.770507	3.5213	-2.7508	1.09022	-2.43108	-0.319716
chr1_41341444_41341692_ETS1_HUMAN.H11MO.0.A_center129_to_TP53_MA0106.3	chr1_41341444_41341692	CTTCTTGCACATCTGTGGAAAGGGGAGTTTGCTTTGAACTGCATTTCCTCACCAGCGTCACCCATTCCTTAAGAGTCAGGTTGATAAACGAGTCAATGCTGAGCCCAAACCAGGCAGGATTACATGCCCGGGCATGTACATTGCTGCTGCTGCTGCTGCTGCATCCTGTGTCTGAGTCATTTCCTCATCTTTAATAGCTAACATGATGCCCAGTACAAAATAGGTATGGGGGAATATTTACTGAATGAA	+	chr1_41341444_41341692_ETS1_HUMAN.H11MO.0.A_center129	ETS	AATCATTTCCTCCTCC	129	P53	ACATGCCCGGGCATGT	116	145	128	1163	788	1274	4.9501	3.5213	1.42879	1.09022	-2.43108	3.85987
chr1_41341444_41341692_ETS1_HUMAN.H11MO.0.A_center182_to_CREB1_MA0018.3	chr1_41341444_41341692	CTTCTTGCACATCTGTGGAAAGGGGAGTTTGCTTTGAACTGCATTTCCTCACCAGCGTCACCCATTCCTTAAGAGTCAGGTTGATAAACGAGTCAATGCTGAGCCCAAACCAGGCAGGATTAATCATTTCCTCCTCCACATTGCTGCTGCTGCTGCTGCTGCATCCTGTGTCTGAGTCTGACGTCAATCTTTAATAGCTAACATGATGCCCAGTACAAAATAGGTATGGGGGAATATTTACTGAATGAA	+	chr1_41341444_41341692_ETS1_HUMAN.H11MO.0.A_center182	ETS	ATTTCCTC	182	CREB1	TGACGTCA	110	99	108	59	58	69	1.13609	3.5213	-2.38521	1.38383	-2.13747	-0.247742
chr1_41341444_41341692_ETS1_HUMAN.H11MO.0.A_center182_to_EGR1_C2H2_1	chr1_41341444_41341692	CTTCTTGCACATCTGTGGAAAGGGGAGTTTGCTTTGAACTGCATTTCCTCACCAGCGTCACCCATTCCTTAAGAGTCAGGTTGATAAACGAGTCAATGCTGAGCCCAAACCAGGCAGGATTAATCATTTCCTCCTCCACATTGCTGCTGCTGCTGCTGCTGCATCCTGTGTCTGAGACGCCCACGCATCTTTAATAGCTAACATGATGCCCAGTACAAAATAGGTATGGGGGAATATTTACTGAATGAA	+	chr1_41341444_41341692_ETS1_HUMAN.H11MO.0.A_center182	ETS	TCATTTCCTCA	182	EGR1	ACGCCCACGCA	170	176	180	103	78	104	1.02648	3.5213	-2.49482	1.38383	-2.13747	-0.357353
chr1_41341444_41341692_ETS1_HUMAN.H11MO.0.A_center182_to_FOSL1_MA0477.1	chr1_41341444_41341692	CTTCTTGCACATCTGTGGAAAGGGGAGTTTGCTTTGAACTGCATTTCCTCACCAGCGTCACCCATTCCTTAAGAGTCAGGTTGATAAACGAGTCAATGCTGAGCCCAAACCAGGCAGGATTAATCATTTCCTCCTCCACATTGCTGCTGCTGCTGCTGCTGCATCCTGTGTCTGAGTGTGACTCATATCTTTAATAGCTAACATGATGCCCAGTACAAAATAGGTATGGGGGAATATTTACTGAATGAA	+	chr1_41341444_41341692_ETS1_HUMAN.H11MO.0.A_center182	ETS	CATTTCCTC	182	AP-1	GTGACTCAT	166	182	206	280	234	216	2.37169	3.5213	-1.14961	1.38383	-2.13747	0.987861
chr1_41341444_41341692_ETS1_HUMAN.H11MO.0.A_center182_to_MAFK_MA0496.2	chr1_41341444_41341692	CTTCTTGCACATCTGTGGAAAGGGGAGTTTGCTTTGAACTGCATTTCCTCACCAGCGTCACCCATTCCTTAAGAGTCAGGTTGATAAACGAGTCAATGCTGAGCCCAAACCAGGCAGGATTAATCATTTCCTCCTCCACATTGCTGCTGCTGCTGCTGCTGCATCCTGTGTCTGATGCTGAGTCAGCACTTTAATAGCTAACATGATGCCCAGTACAAAATAGGTATGGGGGAATATTTACTGAATGAA	+	chr1_41341444_41341692_ETS1_HUMAN.H11MO.0.A_center182	ETS	GTCATTTCCTCAT	182	MAF	TGCTGAGTCAGCA	269	308	278	101	74	142	0.427521	3.5213	-3.09378	1.38383	-2.13747	-0.956312
chr1_41341444_41341692_ETS1_HUMAN.H11MO.0.A_center182_to_MECP2_HUMAN.H11MO.0.C	chr1_41341444_41341692	CTTCTTGCACATCTGTGGAAAGGGGAGTTTGCTTTGAACTGCATTTCCTCACCAGCGTCACCCATTCCTTAAGAGTCAGGTTGATAAACGAGTCAATGCTGAGCCCAAACCAGGCAGGATTAATCATTTCCTCCTCCACATTGCTGCTGCTGCTGCTGCTGCATCCTGTGTCTGAGTCCCCGGAGCATCTTTAATAGCTAACATGATGCCCAGTACAAAATAGGTATGGGGGAATATTTACTGAATGAA	+	chr1_41341444_41341692_ETS1_HUMAN.H11MO.0.A_center182	ETS	ATTTCCT	182	MECP2	CCCGGAG	125	116	128	33	31	59	0.25969	3.5213	-3.26161	1.38383	-2.13747	-1.12414
chr1_41341444_41341692_ETS1_HUMAN.H11MO.0.A_center182_to_TP53_MA0106.3	chr1_41341444_41341692	CTTCTTGCACATCTGTGGAAAGGGGAGTTTGCTTTGAACTGCATTTCCTCACCAGCGTCACCCATTCCTTAAGAGTCAGGTTGATAAACGAGTCAATGCTGAGCCCAAACCAGGCAGGATTAATCATTTCCTCCTCCACATTGCTGCTGCTGCTGCTGCTGCATCCTGTGTCTGACATGCCCGGGCATGTTTAATAGCTAACATGATGCCCAGTACAAAATAGGTATGGGGGAATATTTACTGAATGAA	+	chr1_41341444_41341692_ETS1_HUMAN.H11MO.0.A_center182	ETS	AGTCATTTCCTCATCT	182	P53	ACATGCCCGGGCATGT	204	233	243	1053	811	1372	4.1322	3.5213	0.610894	1.38383	-2.13747	2.74837
chr1_41341444_41341692_FOSL1_MA0477.1_center176_to_CREB1_MA0018.3	chr1_41341444_41341692	CTTCTTGCACATCTGTGGAAAGGGGAGTTTGCTTTGAACTGCATTTCCTCACCAGCGTCACCCATTCCTTAAGAGTCAGGTTGATAAACGAGTCAATGCTGAGCCCAAACCAGGCAGGATTAATCATTTCCTCCTCCACATTGCTGCTGCTGCTGCTGCTGCATCCTGTGTCTGACGTCATTCCTCATCTTTAATAGCTAACATGATGCCCAGTACAAAATAGGTATGGGGGAATATTTACTGAATGAA	+	chr1_41341444_41341692_FOSL1_MA0477.1_center176	AP-1	TGAGTCAT	176	CREB1	TGACGTCA	349	407	383	245	218	270	1.28707	3.5213	-2.23423	0.437907	-3.0834	0.849167
chr1_41341444_41341692_FOSL1_MA0477.1_center176_to_E2F1_HUMAN.H11MO.0.A	chr1_41341444_41341692	CTTCTTGCACATCTGTGGAAAGGGGAGTTTGCTTTGAACTGCATTTCCTCACCAGCGTCACCCATTCCTTAAGAGTCAGGTTGATAAACGAGTCAATGCTGAGCCCAAACCAGGCAGGATTAATCATTTCCTCCTCCACATTGCTGCTGCTGCTGCTGCTGCATCCTGTGTCGGCGGGAATTCCTCATCTTTAATAGCTAACATGATGCCCAGTACAAAATAGGTATGGGGGAATATTTACTGAATGAA	+	chr1_41341444_41341692_FOSL1_MA0477.1_center176	AP-1	TGAGTCAT	176	E2F1	GGCGGGAA	240	237	239	75	63	112	0.341848	3.5213	-3.17946	0.437907	-3.0834	-0.0960589
chr1_41341444_41341692_FOSL1_MA0477.1_center176_to_EGR1_C2H2_1	chr1_41341444_41341692	CTTCTTGCACATCTGTGGAAAGGGGAGTTTGCTTTGAACTGCATTTCCTCACCAGCGTCACCCATTCCTTAAGAGTCAGGTTGATAAACGAGTCAATGCTGAGCCCAAACCAGGCAGGATTAATCATTTCCTCCTCCACATTGCTGCTGCTGCTGCTGCTGCATCCTGTGACGCCCACGCATCCTCATCTTTAATAGCTAACATGATGCCCAGTACAAAATAGGTATGGGGGAATATTTACTGAATGAA	+	chr1_41341444_41341692_FOSL1_MA0477.1_center176	AP-1	TCTGAGTCATT	176	EGR1	ACGCCCACGCA	267	253	247	184	152	192	1.37946	3.5213	-2.14185	0.437907	-3.0834	0.941551
chr1_41341444_41341692_FOSL1_MA0477.1_center176_to_ETS1_HUMAN.H11MO.0.A	chr1_41341444_41341692	CTTCTTGCACATCTGTGGAAAGGGGAGTTTGCTTTGAACTGCATTTCCTCACCAGCGTCACCCATTCCTTAAGAGTCAGGTTGATAAACGAGTCAATGCTGAGCCCAAACCAGGCAGGATTAATCATTTCCTCCTCCACATTGCTGCTGCTGCTGCTGCTGCATCCTGTGTACCGGAAGTTTCCTCATCTTTAATAGCTAACATGATGCCCAGTACAAAATAGGTATGGGGGAATATTTACTGAATGAA	+	chr1_41341444_41341692_FOSL1_MA0477.1_center176	AP-1	CTGAGTCAT	176	ETS	ACCGGAAGT	220	221	182	93	69	156	0.859266	3.5213	-2.66204	0.437907	-3.0834	0.421359
chr1_41341444_41341692_FOSL1_MA0477.1_center176_to_MECP2_HUMAN.H11MO.0.C	chr1_41341444_41341692	CTTCTTGCACATCTGTGGAAAGGGGAGTTTGCTTTGAACTGCATTTCCTCACCAGCGTCACCCATTCCTTAAGAGTCAGGTTGATAAACGAGTCAATGCTGAGCCCAAACCAGGCAGGATTAATCATTTCCTCCTCCACATTGCTGCTGCTGCTGCTGCTGCATCCTGTGTCCCCGGAGTTTCCTCATCTTTAATAGCTAACATGATGCCCAGTACAAAATAGGTATGGGGGAATATTTACTGAATGAA	+	chr1_41341444_41341692_FOSL1_MA0477.1_center176	AP-1	TGAGTCA	176	MECP2	CCCGGAG	76	74	78	33	29	32	0.624837	3.5213	-2.89647	0.437907	-3.0834	0.18693
chr1_41341444_41341692_FOSL1_MA0477.1_center176_to_TP53_MA0106.3	chr1_41341444_41341692	CTTCTTGCACATCTGTGGAAAGGGGAGTTTGCTTTGAACTGCATTTCCTCACCAGCGTCACCCATTCCTTAAGAGTCAGGTTGATAAACGAGTCAATGCTGAGCCCAAACCAGGCAGGATTAATCATTTCCTCCTCCACATTGCTGCTGCTGCTGCTGCTGCATCCTGACATGCCCGGGCATGTTCATCTTTAATAGCTAACATGATGCCCAGTACAAAATAGGTATGGGGGAATATTTACTGAATGAA	+	chr1_41341444_41341692_FOSL1_MA0477.1_center176	AP-1	TGTCTGAGTCATTTCC	176	P53	ACATGCCCGGGCATGT	98	102	107	383	339	564	3.93942	3.5213	0.418112	0.437907	-3.0834	3.50151
chr1_43938204_43938452_CREB1_MA0018.3_center94_to_E2F1_HUMAN.H11MO.0.A	chr1_43938204_43938452	TTAAGTGCCGGCGCTACTTGATCTCTTAATGCCTTGCCCATCACCTGCATTCCCTCCCATGCTCCCACCATTGATAATGTGGGTAATGATGGCGGGAACACATGCCATGGATTACTCACTTCCTCATTCTTCCCCAGCAAGGTTATCGCTGTGTTCCTCAAATACATGAGCAACGGAATTCCAGAATCCCATTTTGAGGAACTATTTTCTGATTTCACAATGGCTATGTCAGTCTGAGTTCAAATAGGA	+	chr1_43938204_43938452_CREB1_MA0018.3_center94	CREB1	GATGTCAC	94	E2F1	GGCGGGAA	288	280	280	189	141	293	1.39813	3.8325	-2.43436	0.748127	-3.08437	0.650007
chr1_43938204_43938452_CREB1_MA0018.3_center94_to_EGR1_C2H2_1	chr1_43938204_43938452	TTAAGTGCCGGCGCTACTTGATCTCTTAATGCCTTGCCCATCACCTGCATTCCCTCCCATGCTCCCACCATTGATAATGTGGGTAATGACGCCCACGCAACATGCCATGGATTACTCACTTCCTCATTCTTCCCCAGCAAGGTTATCGCTGTGTTCCTCAAATACATGAGCAACGGAATTCCAGAATCCCATTTTGAGGAACTATTTTCTGATTTCACAATGGCTATGTCAGTCTGAGTTCAAATAGGA	+	chr1_43938204_43938452_CREB1_MA0018.3_center94	CREB1	ATGATGTCACC	94	EGR1	ACGCCCACGCA	343	328	355	1108	917	812	3.44955	3.8325	-0.382948	0.748127	-3.08437	2.70142
chr1_43938204_43938452_CREB1_MA0018.3_center94_to_ETS1_HUMAN.H11MO.0.A	chr1_43938204_43938452	TTAAGTGCCGGCGCTACTTGATCTCTTAATGCCTTGCCCATCACCTGCATTCCCTCCCATGCTCCCACCATTGATAATGTGGGTAATGAACCGGAAGTCACATGCCATGGATTACTCACTTCCTCATTCTTCCCCAGCAAGGTTATCGCTGTGTTCCTCAAATACATGAGCAACGGAATTCCAGAATCCCATTTTGAGGAACTATTTTCTGATTTCACAATGGCTATGTCAGTCTGAGTTCAAATAGGA	+	chr1_43938204_43938452_CREB1_MA0018.3_center94	CREB1	TGATGTCAC	94	ETS	ACCGGAAGT	424	389	439	460	409	401	1.98187	3.8325	-1.85063	0.748127	-3.08437	1.23374
chr1_43938204_43938452_CREB1_MA0018.3_center94_to_FOSL1_MA0477.1	chr1_43938204_43938452	TTAAGTGCCGGCGCTACTTGATCTCTTAATGCCTTGCCCATCACCTGCATTCCCTCCCATGCTCCCACCATTGATAATGTGGGTAATGAGTGACTCATCACATGCCATGGATTACTCACTTCCTCATTCTTCCCCAGCAAGGTTATCGCTGTGTTCCTCAAATACATGAGCAACGGAATTCCAGAATCCCATTTTGAGGAACTATTTTCTGATTTCACAATGGCTATGTCAGTCTGAGTTCAAATAGGA	+	chr1_43938204_43938452_CREB1_MA0018.3_center94	CREB1	TGATGTCAC	94	AP-1	GTGACTCAT	203	209	219	1319	1101	1081	4.4398	3.8325	0.607302	0.748127	-3.08437	3.69167
chr1_43938204_43938452_CREB1_MA0018.3_center94_to_MAFK_MA0496.2	chr1_43938204_43938452	TTAAGTGCCGGCGCTACTTGATCTCTTAATGCCTTGCCCATCACCTGCATTCCCTCCCATGCTCCCACCATTGATAATGTGGGTAATTGCTGAGTCAGCACATGCCATGGATTACTCACTTCCTCATTCTTCCCCAGCAAGGTTATCGCTGTGTTCCTCAAATACATGAGCAACGGAATTCCAGAATCCCATTTTGAGGAACTATTTTCTGATTTCACAATGGCTATGTCAGTCTGAGTTCAAATAGGA	+	chr1_43938204_43938452_CREB1_MA0018.3_center94	CREB1	GATGATGTCACCA	94	MAF	TGCTGAGTCAGCA	389	397	395	1329	1159	1073	3.5664	3.8325	-0.266101	0.748127	-3.08437	2.81827
chr1_43938204_43938452_CREB1_MA0018.3_center94_to_MECP2_HUMAN.H11MO.0.C	chr1_43938204_43938452	TTAAGTGCCGGCGCTACTTGATCTCTTAATGCCTTGCCCATCACCTGCATTCCCTCCCATGCTCCCACCATTGATAATGTGGGTAATGATCCCGGAGCCACATGCCATGGATTACTCACTTCCTCATTCTTCCCCAGCAAGGTTATCGCTGTGTTCCTCAAATACATGAGCAACGGAATTCCAGAATCCCATTTTGAGGAACTATTTTCTGATTTCACAATGGCTATGTCAGTCTGAGTTCAAATAGGA	+	chr1_43938204_43938452_CREB1_MA0018.3_center94	CREB1	GATGTCA	94	MECP2	CCCGGAG	276	271	269	192	180	243	1.49382	3.8325	-2.33868	0.748127	-3.08437	0.745691
chr1_43938204_43938452_CREB1_MA0018.3_center94_to_TP53_MA0106.3	chr1_43938204_43938452	TTAAGTGCCGGCGCTACTTGATCTCTTAATGCCTTGCCCATCACCTGCATTCCCTCCCATGCTCCCACCATTGATAATGTGGGTAAACATGCCCGGGCATGTTGCCATGGATTACTCACTTCCTCATTCTTCCCCAGCAAGGTTATCGCTGTGTTCCTCAAATACATGAGCAACGGAATTCCAGAATCCCATTTTGAGGAACTATTTTCTGATTTCACAATGGCTATGTCAGTCTGAGTTCAAATAGGA	+	chr1_43938204_43938452_CREB1_MA0018.3_center94	CREB1	TGATGATGTCACCACA	94	P53	ACATGCCCGGGCATGT	217	235	263	931	665	959	3.75195	3.8325	-0.0805445	0.748127	-3.08437	3.00383
chr1_43938204_43938452_ETS1_HUMAN.H11MO.0.A_center121_to_CREB1_MA0018.3	chr1_43938204_43938452	TTAAGTGCCGGCGCTACTTGATCTCTTAATGCCTTGCCCATCACCTGCATTCCCTCCCATGCTCCCACCATTGATAATGTGGGTAATGATGATGTCACCACATGCCATGGATTACTCTGACGTCAATTCTTCCCCAGCAAGGTTATCGCTGTGTTCCTCAAATACATGAGCAACGGAATTCCAGAATCCCATTTTGAGGAACTATTTTCTGATTTCACAATGGCTATGTCAGTCTGAGTTCAAATAGGA	+	chr1_43938204_43938452_ETS1_HUMAN.H11MO.0.A_center121	ETS	ACTTCCTC	121	CREB1	TGACGTCA	164	142	122	117	109	100	1.56197	3.8325	-2.27052	1.43313	-2.39937	0.128845
chr1_43938204_43938452_ETS1_HUMAN.H11MO.0.A_center121_to_EGR1_C2H2_1	chr1_43938204_43938452	TTAAGTGCCGGCGCTACTTGATCTCTTAATGCCTTGCCCATCACCTGCATTCCCTCCCATGCTCCCACCATTGATAATGTGGGTAATGATGATGTCACCACATGCCATGGATTACACGCCCACGCATTCTTCCCCAGCAAGGTTATCGCTGTGTTCCTCAAATACATGAGCAACGGAATTCCAGAATCCCATTTTGAGGAACTATTTTCTGATTTCACAATGGCTATGTCAGTCTGAGTTCAAATAGGA	+	chr1_43938204_43938452_ETS1_HUMAN.H11MO.0.A_center121	ETS	TCACTTCCTCA	121	EGR1	ACGCCCACGCA	116	147	144	101	115	120	1.6573	3.8325	-2.1752	1.43313	-2.39937	0.224169
chr1_43938204_43938452_ETS1_HUMAN.H11MO.0.A_center121_to_FOSL1_MA0477.1	chr1_43938204_43938452	TTAAGTGCCGGCGCTACTTGATCTCTTAATGCCTTGCCCATCACCTGCATTCCCTCCCATGCTCCCACCATTGATAATGTGGGTAATGATGATGTCACCACATGCCATGGATTACTGTGACTCATATTCTTCCCCAGCAAGGTTATCGCTGTGTTCCTCAAATACATGAGCAACGGAATTCCAGAATCCCATTTTGAGGAACTATTTTCTGATTTCACAATGGCTATGTCAGTCTGAGTTCAAATAGGA	+	chr1_43938204_43938452_ETS1_HUMAN.H11MO.0.A_center121	ETS	CACTTCCTC	121	AP-1	GTGACTCAT	323	291	312	449	459	426	2.48999	3.8325	-1.34251	1.43313	-2.39937	1.05686
chr1_43938204_43938452_ETS1_HUMAN.H11MO.0.A_center121_to_MAFK_MA0496.2	chr1_43938204_43938452	TTAAGTGCCGGCGCTACTTGATCTCTTAATGCCTTGCCCATCACCTGCATTCCCTCCCATGCTCCCACCATTGATAATGTGGGTAATGATGATGTCACCACATGCCATGGATTATGCTGAGTCAGCATCTTCCCCAGCAAGGTTATCGCTGTGTTCCTCAAATACATGAGCAACGGAATTCCAGAATCCCATTTTGAGGAACTATTTTCTGATTTCACAATGGCTATGTCAGTCTGAGTTCAAATAGGA	+	chr1_43938204_43938452_ETS1_HUMAN.H11MO.0.A_center121	ETS	CTCACTTCCTCAT	121	MAF	TGCTGAGTCAGCA	311	352	286	118	126	121	0.568926	3.8325	-3.26357	1.43313	-2.39937	-0.864204
chr1_43938204_43938452_ETS1_HUMAN.H11MO.0.A_center121_to_MECP2_HUMAN.H11MO.0.C	chr1_43938204_43938452	TTAAGTGCCGGCGCTACTTGATCTCTTAATGCCTTGCCCATCACCTGCATTCCCTCCCATGCTCCCACCATTGATAATGTGGGTAATGATGATGTCACCACATGCCATGGATTACTCCCCGGAGCATTCTTCCCCAGCAAGGTTATCGCTGTGTTCCTCAAATACATGAGCAACGGAATTCCAGAATCCCATTTTGAGGAACTATTTTCTGATTTCACAATGGCTATGTCAGTCTGAGTTCAAATAGGA	+	chr1_43938204_43938452_ETS1_HUMAN.H11MO.0.A_center121	ETS	ACTTCCT	121	MECP2	CCCGGAG	204	169	203	77	103	82	0.825459	3.8325	-3.00704	1.43313	-2.39937	-0.607671
chr1_43938204_43938452_ETS1_HUMAN.H11MO.0.A_center121_to_TP53_MA0106.3	chr1_43938204_43938452	TTAAGTGCCGGCGCTACTTGATCTCTTAATGCCTTGCCCATCACCTGCATTCCCTCCCATGCTCCCACCATTGATAATGTGGGTAATGATGATGTCACCACATGCCATGGATTACATGCCCGGGCATGTTTCCCCAGCAAGGTTATCGCTGTGTTCCTCAAATACATGAGCAACGGAATTCCAGAATCCCATTTTGAGGAACTATTTTCTGATTTCACAATGGCTATGTCAGTCTGAGTTCAAATAGGA	+	chr1_43938204_43938452_ETS1_HUMAN.H11MO.0.A_center121	ETS	ACTCACTTCCTCATTC	121	P53	ACATGCCCGGGCATGT	173	184	158	573	459	700	3.64367	3.8325	-0.18883	1.43313	-2.39937	2.21054
chr1_43938204_43938452_FOSL1_MA0477.1_center115_to_CREB1_MA0018.3	chr1_43938204_43938452	TTAAGTGCCGGCGCTACTTGATCTCTTAATGCCTTGCCCATCACCTGCATTCCCTCCCATGCTCCCACCATTGATAATGTGGGTAATGATGATGTCACCACATGCCATGGATGACGTCATTCCTCATTCTTCCCCAGCAAGGTTATCGCTGTGTTCCTCAAATACATGAGCAACGGAATTCCAGAATCCCATTTTGAGGAACTATTTTCTGATTTCACAATGGCTATGTCAGTCTGAGTTCAAATAGGA	+	chr1_43938204_43938452_FOSL1_MA0477.1_center115	AP-1	TTACTCAC	115	CREB1	TGACGTCA	524	542	537	230	267	230	0.828062	3.8325	-3.00443	0.368626	-3.46387	0.459436
chr1_43938204_43938452_FOSL1_MA0477.1_center115_to_E2F1_HUMAN.H11MO.0.A	chr1_43938204_43938452	TTAAGTGCCGGCGCTACTTGATCTCTTAATGCCTTGCCCATCACCTGCATTCCCTCCCATGCTCCCACCATTGATAATGTGGGTAATGATGATGTCACCACATGCCATGGAGGCGGGAATTCCTCATTCTTCCCCAGCAAGGTTATCGCTGTGTTCCTCAAATACATGAGCAACGGAATTCCAGAATCCCATTTTGAGGAACTATTTTCTGATTTCACAATGGCTATGTCAGTCTGAGTTCAAATAGGA	+	chr1_43938204_43938452_FOSL1_MA0477.1_center115	AP-1	TTACTCAC	115	E2F1	GGCGGGAA	585	580	552	212	226	230	0.581268	3.8325	-3.25123	0.368626	-3.46387	0.212642
chr1_43938204_43938452_FOSL1_MA0477.1_center115_to_EGR1_C2H2_1	chr1_43938204_43938452	TTAAGTGCCGGCGCTACTTGATCTCTTAATGCCTTGCCCATCACCTGCATTCCCTCCCATGCTCCCACCATTGATAATGTGGGTAATGATGATGTCACCACATGCCATGACGCCCACGCATCCTCATTCTTCCCCAGCAAGGTTATCGCTGTGTTCCTCAAATACATGAGCAACGGAATTCCAGAATCCCATTTTGAGGAACTATTTTCTGATTTCACAATGGCTATGTCAGTCTGAGTTCAAATAGGA	+	chr1_43938204_43938452_FOSL1_MA0477.1_center115	AP-1	GATTACTCACT	115	EGR1	ACGCCCACGCA	462	463	462	745	709	590	2.54481	3.8325	-1.28768	0.368626	-3.46387	2.17619
chr1_43938204_43938452_FOSL1_MA0477.1_center115_to_ETS1_HUMAN.H11MO.0.A	chr1_43938204_43938452	TTAAGTGCCGGCGCTACTTGATCTCTTAATGCCTTGCCCATCACCTGCATTCCCTCCCATGCTCCCACCATTGATAATGTGGGTAATGATGATGTCACCACATGCCATGGACCGGAAGTTTCCTCATTCTTCCCCAGCAAGGTTATCGCTGTGTTCCTCAAATACATGAGCAACGGAATTCCAGAATCCCATTTTGAGGAACTATTTTCTGATTTCACAATGGCTATGTCAGTCTGAGTTCAAATAGGA	+	chr1_43938204_43938452_FOSL1_MA0477.1_center115	AP-1	ATTACTCAC	115	ETS	ACCGGAAGT	227	286	267	183	162	177	1.36318	3.8325	-2.46931	0.368626	-3.46387	0.994556
chr1_43938204_43938452_FOSL1_MA0477.1_center115_to_MECP2_HUMAN.H11MO.0.C	chr1_43938204_43938452	TTAAGTGCCGGCGCTACTTGATCTCTTAATGCCTTGCCCATCACCTGCATTCCCTCCCATGCTCCCACCATTGATAATGTGGGTAATGATGATGTCACCACATGCCATGGACCCGGAGCTTCCTCATTCTTCCCCAGCAAGGTTATCGCTGTGTTCCTCAAATACATGAGCAACGGAATTCCAGAATCCCATTTTGAGGAACTATTTTCTGATTTCACAATGGCTATGTCAGTCTGAGTTCAAATAGGA	+	chr1_43938204_43938452_FOSL1_MA0477.1_center115	AP-1	TTACTCA	115	MECP2	CCCGGAG	475	498	511	204	210	239	0.743495	3.8325	-3.089	0.368626	-3.46387	0.374868
chr1_43938204_43938452_FOSL1_MA0477.1_center115_to_TP53_MA0106.3	chr1_43938204_43938452	TTAAGTGCCGGCGCTACTTGATCTCTTAATGCCTTGCCCATCACCTGCATTCCCTCCCATGCTCCCACCATTGATAATGTGGGTAATGATGATGTCACCACATGCCAACATGCCCGGGCATGTTCATTCTTCCCCAGCAAGGTTATCGCTGTGTTCCTCAAATACATGAGCAACGGAATTCCAGAATCCCATTTTGAGGAACTATTTTCTGATTTCACAATGGCTATGTCAGTCTGAGTTCAAATAGGA	+	chr1_43938204_43938452_FOSL1_MA0477.1_center115	AP-1	TGGATTACTCACTTCC	115	P53	ACATGCCCGGGCATGT	208	295	247	604	522	764	3.23491	3.8325	-0.597585	0.368626	-3.46387	2.86629
chr1_43938204_43938452_TP53_MA0106.3_center98_to_E2F1_HUMAN.H11MO.0.A	chr1_43938204_43938452	TTAAGTGCCGGCGCTACTTGATCTCTTAATGCCTTGCCCATCACCTGCATTCCCTCCCATGCTCCCACCATTGATAATGTGGGTAATGATGATGGGCGGGAATGCCATGGATTACTCACTTCCTCATTCTTCCCCAGCAAGGTTATCGCTGTGTTCCTCAAATACATGAGCAACGGAATTCCAGAATCCCATTTTGAGGAACTATTTTCTGATTTCACAATGGCTATGTCAGTCTGAGTTCAAATAGGA	+	chr1_43938204_43938452_TP53_MA0106.3_center98	P53	TCACCACA	98	E2F1	GGCGGGAA	250	265	252	169	157	188	1.34449	3.8325	-2.48801	-0.212828	-4.04533	1.55731
chr1_43938204_43938452_TP53_MA0106.3_center98_to_EGR1_C2H2_1	chr1_43938204_43938452	TTAAGTGCCGGCGCTACTTGATCTCTTAATGCCTTGCCCATCACCTGCATTCCCTCCCATGCTCCCACCATTGATAATGTGGGTAATGATGAACGCCCACGCAGCCATGGATTACTCACTTCCTCATTCTTCCCCAGCAAGGTTATCGCTGTGTTCCTCAAATACATGAGCAACGGAATTCCAGAATCCCATTTTGAGGAACTATTTTCTGATTTCACAATGGCTATGTCAGTCTGAGTTCAAATAGGA	+	chr1_43938204_43938452_TP53_MA0106.3_center98	P53	TGTCACCACAT	98	EGR1	ACGCCCACGCA	144	209	169	401	367	321	3.043	3.8325	-0.7895	-0.212828	-4.04533	3.25583
chr1_43938204_43938452_TP53_MA0106.3_center98_to_ETS1_HUMAN.H11MO.0.A	chr1_43938204_43938452	TTAAGTGCCGGCGCTACTTGATCTCTTAATGCCTTGCCCATCACCTGCATTCCCTCCCATGCTCCCACCATTGATAATGTGGGTAATGATGATACCGGAAGTTGCCATGGATTACTCACTTCCTCATTCTTCCCCAGCAAGGTTATCGCTGTGTTCCTCAAATACATGAGCAACGGAATTCCAGAATCCCATTTTGAGGAACTATTTTCTGATTTCACAATGGCTATGTCAGTCTGAGTTCAAATAGGA	+	chr1_43938204_43938452_TP53_MA0106.3_center98	P53	GTCACCACA	98	ETS	ACCGGAAGT	372	428	348	518	453	491	2.29634	3.8325	-1.53616	-0.212828	-4.04533	2.50917
chr1_43938204_43938452_TP53_MA0106.3_center98_to_FOSL1_MA0477.1	chr1_43938204_43938452	TTAAGTGCCGGCGCTACTTGATCTCTTAATGCCTTGCCCATCACCTGCATTCCCTCCCATGCTCCCACCATTGATAATGTGGGTAATGATGATGTGACTCATTGCCATGGATTACTCACTTCCTCATTCTTCCCCAGCAAGGTTATCGCTGTGTTCCTCAAATACATGAGCAACGGAATTCCAGAATCCCATTTTGAGGAACTATTTTCTGATTTCACAATGGCTATGTCAGTCTGAGTTCAAATAGGA	+	chr1_43938204_43938452_TP53_MA0106.3_center98	P53	GTCACCACA	98	AP-1	GTGACTCAT	658	669	603	2847	2533	2392	3.97953	3.8325	0.147037	-0.212828	-4.04533	4.19236
chr1_43938204_43938452_TP53_MA0106.3_center98_to_MAFK_MA0496.2	chr1_43938204_43938452	TTAAGTGCCGGCGCTACTTGATCTCTTAATGCCTTGCCCATCACCTGCATTCCCTCCCATGCTCCCACCATTGATAATGTGGGTAATGATGTGCTGAGTCAGCACCATGGATTACTCACTTCCTCATTCTTCCCCAGCAAGGTTATCGCTGTGTTCCTCAAATACATGAGCAACGGAATTCCAGAATCCCATTTTGAGGAACTATTTTCTGATTTCACAATGGCTATGTCAGTCTGAGTTCAAATAGGA	+	chr1_43938204_43938452_TP53_MA0106.3_center98	P53	ATGTCACCACATG	98	MAF	TGCTGAGTCAGCA	140	147	127	240	217	184	2.60918	3.8325	-1.22332	-0.212828	-4.04533	2.82201
chr1_51069367_51069615_TP53_MA0106.3_center54_to_E2F1_HUMAN.H11MO.0.A	chr1_51069367_51069615	GTTGAAGCAAGCTTATCAAGAATGCTAGTTACCAAGTGTACATGCACTTGGGCGGGAAAGCCCACTGCCACATTCTTGTAGCAGGGTTAAACAGCAGTTTAGTCACCTCATAAAAAAGCACACTGTTAAAAAGGAAGTGACTAATAATATTCTGGAACCAACAGAATATTAAAAGACATGTGCAGGTCAAGATCAATTATCAACAAAACTCCTGTGTAAATAGCTCAAAAAACTGTGTTCTCTGCCTGG	+	chr1_51069367_51069615_TP53_MA0106.3_center54	P53	TCTGGACT	54	E2F1	GGCGGGAA	92	78	80	22	26	52	0.506812	2.27319	-1.76638	0.21719	-2.056	0.289622
chr1_51069367_51069615_TP53_MA0106.3_center54_to_EGR1_C2H2_1	chr1_51069367_51069615	GTTGAAGCAAGCTTATCAAGAATGCTAGTTACCAAGTGTACATGCACTACGCCCACGCAGCCCACTGCCACATTCTTGTAGCAGGGTTAAACAGCAGTTTAGTCACCTCATAAAAAAGCACACTGTTAAAAAGGAAGTGACTAATAATATTCTGGAACCAACAGAATATTAAAAGACATGTGCAGGTCAAGATCAATTATCAACAAAACTCCTGTGTAAATAGCTCAAAAAACTGTGTTCTCTGCCTGG	+	chr1_51069367_51069615_TP53_MA0106.3_center54	P53	TGTCTGGACTA	54	EGR1	ACGCCCACGCA	129	139	113	111	113	135	1.82772	2.27319	-0.445466	0.21719	-2.056	1.61053
chr1_51069367_51069615_TP53_MA0106.3_center54_to_ETS1_HUMAN.H11MO.0.A	chr1_51069367_51069615	GTTGAAGCAAGCTTATCAAGAATGCTAGTTACCAAGTGTACATGCACTTACCGGAAGTAGCCCACTGCCACATTCTTGTAGCAGGGTTAAACAGCAGTTTAGTCACCTCATAAAAAAGCACACTGTTAAAAAGGAAGTGACTAATAATATTCTGGAACCAACAGAATATTAAAAGACATGTGCAGGTCAAGATCAATTATCAACAAAACTCCTGTGTAAATAGCTCAAAAAACTGTGTTCTCTGCCTGG	+	chr1_51069367_51069615_TP53_MA0106.3_center54	P53	GTCTGGACT	54	ETS	ACCGGAAGT	34	26	21	12	17	23	1.21826	2.27319	-1.05493	0.21719	-2.056	1.00107
chr1_51069367_51069615_TP53_MA0106.3_center54_to_FOSL1_MA0477.1	chr1_51069367_51069615	GTTGAAGCAAGCTTATCAAGAATGCTAGTTACCAAGTGTACATGCACTTGTGACTCATAGCCCACTGCCACATTCTTGTAGCAGGGTTAAACAGCAGTTTAGTCACCTCATAAAAAAGCACACTGTTAAAAAGGAAGTGACTAATAATATTCTGGAACCAACAGAATATTAAAAGACATGTGCAGGTCAAGATCAATTATCAACAAAACTCCTGTGTAAATAGCTCAAAAAACTGTGTTCTCTGCCTGG	+	chr1_51069367_51069615_TP53_MA0106.3_center54	P53	GTCTGGACT	54	AP-1	GTGACTCAT	59	71	51	103	97	121	2.73712	2.27319	0.463929	0.21719	-2.056	2.51993
chr1_51069367_51069615_TP53_MA0106.3_center54_to_MAFK_MA0496.2	chr1_51069367_51069615	GTTGAAGCAAGCTTATCAAGAATGCTAGTTACCAAGTGTACATGCACTGCTGAGTCAGCACCCACTGCCACATTCTTGTAGCAGGGTTAAACAGCAGTTTAGTCACCTCATAAAAAAGCACACTGTTAAAAAGGAAGTGACTAATAATATTCTGGAACCAACAGAATATTAAAAGACATGTGCAGGTCAAGATCAATTATCAACAAAACTCCTGTGTAAATAGCTCAAAAAACTGTGTTCTCTGCCTGG	+	chr1_51069367_51069615_TP53_MA0106.3_center54	P53	TTGTCTGGACTAG	54	MAF	TGCTGAGTCAGCA	25	26	25	8	3	12	0.11393	2.27319	-2.15926	0.21719	-2.056	-0.10326
chr1_54422888_54423136_CREB1_MA0018.3_center164_to_E2F1_HUMAN.H11MO.0.A	chr1_54422888_54423136	ACTGATCCTAACACACCATCTTGCTGTGGAAACTTCCAGACATTCAAGAGGAAGGTGGATGAGAGAGGCCTGCTCTTGCCACAAGTCAGTTTCCCTGTCCTCTTAGGTTCCTCTCCTCTCCATTTCCTGTCACACCTAATCCCTTTCATTTTTTCTCACTGGCGGGAACTGAGATAGATGAACCACTAGAAAGCAGGGTGGAGGCCCCAGCCTGGGCTGTGGAATGCTGTTTTGATCTCCTTTCCCTCT	+	chr1_54422888_54423136_CREB1_MA0018.3_center164	CREB1	GACCTCAT	164	E2F1	GGCGGGAA	320	301	319	109	81	162	0.432678	2.82752	-2.39484	-0.949932	-3.77745	1.38261
chr1_54422888_54423136_CREB1_MA0018.3_center164_to_EGR1_C2H2_1	chr1_54422888_54423136	ACTGATCCTAACACACCATCTTGCTGTGGAAACTTCCAGACATTCAAGAGGAAGGTGGATGAGAGAGGCCTGCTCTTGCCACAAGTCAGTTTCCCTGTCCTCTTAGGTTCCTCTCCTCTCCATTTCCTGTCACACCTAATCCCTTTCATTTTTTCTCAACGCCCACGCATGAGATAGATGAACCACTAGAAAGCAGGGTGGAGGCCCCAGCCTGGGCTGTGGAATGCTGTTTTGATCTCCTTTCCCTCT	+	chr1_54422888_54423136_CREB1_MA0018.3_center164	CREB1	CTGACCTCATC	164	EGR1	ACGCCCACGCA	866	893	858	1087	925	1153	2.20105	2.82752	-0.626472	-0.949932	-3.77745	3.15098
chr1_54422888_54423136_CREB1_MA0018.3_center164_to_ETS1_HUMAN.H11MO.0.A	chr1_54422888_54423136	ACTGATCCTAACACACCATCTTGCTGTGGAAACTTCCAGACATTCAAGAGGAAGGTGGATGAGAGAGGCCTGCTCTTGCCACAAGTCAGTTTCCCTGTCCTCTTAGGTTCCTCTCCTCTCCATTTCCTGTCACACCTAATCCCTTTCATTTTTTCTCACACCGGAAGTCTGAGATAGATGAACCACTAGAAAGCAGGGTGGAGGCCCCAGCCTGGGCTGTGGAATGCTGTTTTGATCTCCTTTCCCTCT	+	chr1_54422888_54423136_CREB1_MA0018.3_center164	CREB1	TGACCTCAT	164	ETS	ACCGGAAGT	411	412	413	341	277	436	1.65681	2.82752	-1.17071	-0.949932	-3.77745	2.60674
chr1_54422888_54423136_CREB1_MA0018.3_center164_to_FOSL1_MA0477.1	chr1_54422888_54423136	ACTGATCCTAACACACCATCTTGCTGTGGAAACTTCCAGACATTCAAGAGGAAGGTGGATGAGAGAGGCCTGCTCTTGCCACAAGTCAGTTTCCCTGTCCTCTTAGGTTCCTCTCCTCTCCATTTCCTGTCACACCTAATCCCTTTCATTTTTTCTCACGTGACTCATCTGAGATAGATGAACCACTAGAAAGCAGGGTGGAGGCCCCAGCCTGGGCTGTGGAATGCTGTTTTGATCTCCTTTCCCTCT	+	chr1_54422888_54423136_CREB1_MA0018.3_center164	CREB1	TGACCTCAT	164	AP-1	GTGACTCAT	404	444	473	653	577	648	2.45132	2.82752	-0.376204	-0.949932	-3.77745	3.40125
chr1_54422888_54423136_CREB1_MA0018.3_center164_to_MAFK_MA0496.2	chr1_54422888_54423136	ACTGATCCTAACACACCATCTTGCTGTGGAAACTTCCAGACATTCAAGAGGAAGGTGGATGAGAGAGGCCTGCTCTTGCCACAAGTCAGTTTCCCTGTCCTCTTAGGTTCCTCTCCTCTCCATTTCCTGTCACACCTAATCCCTTTCATTTTTTCTCTGCTGAGTCAGCAGAGATAGATGAACCACTAGAAAGCAGGGTGGAGGCCCCAGCCTGGGCTGTGGAATGCTGTTTTGATCTCCTTTCCCTCT	+	chr1_54422888_54423136_CREB1_MA0018.3_center164	CREB1	ACTGACCTCATCT	164	MAF	TGCTGAGTCAGCA	844	921	944	1156	929	1225	2.21134	2.82752	-0.616183	-0.949932	-3.77745	3.16127
chr1_54422888_54423136_CREB1_MA0018.3_center164_to_MECP2_HUMAN.H11MO.0.C	chr1_54422888_54423136	ACTGATCCTAACACACCATCTTGCTGTGGAAACTTCCAGACATTCAAGAGGAAGGTGGATGAGAGAGGCCTGCTCTTGCCACAAGTCAGTTTCCCTGTCCTCTTAGGTTCCTCTCCTCTCCATTTCCTGTCACACCTAATCCCTTTCATTTTTTCTCACTCCCGGAGTCTGAGATAGATGAACCACTAGAAAGCAGGGTGGAGGCCCCAGCCTGGGCTGTGGAATGCTGTTTTGATCTCCTTTCCCTCT	+	chr1_54422888_54423136_CREB1_MA0018.3_center164	CREB1	GACCTCA	164	MECP2	CCCGGAG	383	401	408	151	124	199	0.550341	2.82752	-2.27718	-0.949932	-3.77745	1.50027
chr1_54422888_54423136_CREB1_MA0018.3_center164_to_TP53_MA0106.3	chr1_54422888_54423136	ACTGATCCTAACACACCATCTTGCTGTGGAAACTTCCAGACATTCAAGAGGAAGGTGGATGAGAGAGGCCTGCTCTTGCCACAAGTCAGTTTCCCTGTCCTCTTAGGTTCCTCTCCTCTCCATTTCCTGTCACACCTAATCCCTTTCATTTTTTCTACATGCCCGGGCATGTGATAGATGAACCACTAGAAAGCAGGGTGGAGGCCCCAGCCTGGGCTGTGGAATGCTGTTTTGATCTCCTTTCCCTCT	+	chr1_54422888_54423136_CREB1_MA0018.3_center164	CREB1	CACTGACCTCATCTGA	164	P53	ACATGCCCGGGCATGT	455	441	487	816	669	928	2.71341	2.82752	-0.114106	-0.949932	-3.77745	3.66335
chr1_54422888_54423136_ETS1_HUMAN.H11MO.0.A_center125_to_CREB1_MA0018.3	chr1_54422888_54423136	ACTGATCCTAACACACCATCTTGCTGTGGAAACTTCCAGACATTCAAGAGGAAGGTGGATGAGAGAGGCCTGCTCTTGCCACAAGTCAGTTTCCCTGTCCTCTTAGGTTCCTCTCCTCTCCTGACGTCATCACACCTAATCCCTTTCATTTTTTCTCACTGACCTCATCTGAGATAGATGAACCACTAGAAAGCAGGGTGGAGGCCCCAGCCTGGGCTGTGGAATGCTGTTTTGATCTCCTTTCCCTCT	+	chr1_54422888_54423136_ETS1_HUMAN.H11MO.0.A_center125	ETS	ATTTCCTG	125	CREB1	TGACGTCA	284	308	308	643	519	578	2.89969	2.82752	0.0721657	1.34766	-1.47986	1.55202
chr1_54422888_54423136_ETS1_HUMAN.H11MO.0.A_center125_to_E2F1_HUMAN.H11MO.0.A	chr1_54422888_54423136	ACTGATCCTAACACACCATCTTGCTGTGGAAACTTCCAGACATTCAAGAGGAAGGTGGATGAGAGAGGCCTGCTCTTGCCACAAGTCAGTTTCCCTGTCCTCTTAGGTTCCTCTCCTCTCCGGCGGGAATCACACCTAATCCCTTTCATTTTTTCTCACTGACCTCATCTGAGATAGATGAACCACTAGAAAGCAGGGTGGAGGCCCCAGCCTGGGCTGTGGAATGCTGTTTTGATCTCCTTTCCCTCT	+	chr1_54422888_54423136_ETS1_HUMAN.H11MO.0.A_center125	ETS	ATTTCCTG	125	E2F1	GGCGGGAA	302	276	305	177	174	264	1.35728	2.82752	-1.47024	1.34766	-1.47986	0.00962021
chr1_54422888_54423136_ETS1_HUMAN.H11MO.0.A_center125_to_EGR1_C2H2_1	chr1_54422888_54423136	ACTGATCCTAACACACCATCTTGCTGTGGAAACTTCCAGACATTCAAGAGGAAGGTGGATGAGAGAGGCCTGCTCTTGCCACAAGTCAGTTTCCCTGTCCTCTTAGGTTCCTCTCCTCTACGCCCACGCACACACCTAATCCCTTTCATTTTTTCTCACTGACCTCATCTGAGATAGATGAACCACTAGAAAGCAGGGTGGAGGCCCCAGCCTGGGCTGTGGAATGCTGTTTTGATCTCCTTTCCCTCT	+	chr1_54422888_54423136_ETS1_HUMAN.H11MO.0.A_center125	ETS	CCATTTCCTGT	125	EGR1	ACGCCCACGCA	441	427	416	814	639	883	2.77565	2.82752	-0.0518735	1.34766	-1.47986	1.42798
chr1_54422888_54423136_ETS1_HUMAN.H11MO.0.A_center125_to_FOSL1_MA0477.1	chr1_54422888_54423136	ACTGATCCTAACACACCATCTTGCTGTGGAAACTTCCAGACATTCAAGAGGAAGGTGGATGAGAGAGGCCTGCTCTTGCCACAAGTCAGTTTCCCTGTCCTCTTAGGTTCCTCTCCTCTCGTGACTCATTCACACCTAATCCCTTTCATTTTTTCTCACTGACCTCATCTGAGATAGATGAACCACTAGAAAGCAGGGTGGAGGCCCCAGCCTGGGCTGTGGAATGCTGTTTTGATCTCCTTTCCCTCT	+	chr1_54422888_54423136_ETS1_HUMAN.H11MO.0.A_center125	ETS	CATTTCCTG	125	AP-1	GTGACTCAT	761	813	748	1470	1195	1438	2.75712	2.82752	-0.0704035	1.34766	-1.47986	1.40945
chr1_54422888_54423136_ETS1_HUMAN.H11MO.0.A_center125_to_MAFK_MA0496.2	chr1_54422888_54423136	ACTGATCCTAACACACCATCTTGCTGTGGAAACTTCCAGACATTCAAGAGGAAGGTGGATGAGAGAGGCCTGCTCTTGCCACAAGTCAGTTTCCCTGTCCTCTTAGGTTCCTCTCCTCTGCTGAGTCAGCAACACCTAATCCCTTTCATTTTTTCTCACTGACCTCATCTGAGATAGATGAACCACTAGAAAGCAGGGTGGAGGCCCCAGCCTGGGCTGTGGAATGCTGTTTTGATCTCCTTTCCCTCT	+	chr1_54422888_54423136_ETS1_HUMAN.H11MO.0.A_center125	ETS	TCCATTTCCTGTC	125	MAF	TGCTGAGTCAGCA	309	283	328	410	349	469	2.32827	2.82752	-0.499251	1.34766	-1.47986	0.980606
chr1_54422888_54423136_ETS1_HUMAN.H11MO.0.A_center125_to_MECP2_HUMAN.H11MO.0.C	chr1_54422888_54423136	ACTGATCCTAACACACCATCTTGCTGTGGAAACTTCCAGACATTCAAGAGGAAGGTGGATGAGAGAGGCCTGCTCTTGCCACAAGTCAGTTTCCCTGTCCTCTTAGGTTCCTCTCCTCTCCCCCGGAGGTCACACCTAATCCCTTTCATTTTTTCTCACTGACCTCATCTGAGATAGATGAACCACTAGAAAGCAGGGTGGAGGCCCCAGCCTGGGCTGTGGAATGCTGTTTTGATCTCCTTTCCCTCT	+	chr1_54422888_54423136_ETS1_HUMAN.H11MO.0.A_center125	ETS	ATTTCCT	125	MECP2	CCCGGAG	276	321	356	288	250	353	1.80773	2.82752	-1.01979	1.34766	-1.47986	0.46007
chr1_54422888_54423136_ETS1_HUMAN.H11MO.0.A_center125_to_TP53_MA0106.3	chr1_54422888_54423136	ACTGATCCTAACACACCATCTTGCTGTGGAAACTTCCAGACATTCAAGAGGAAGGTGGATGAGAGAGGCCTGCTCTTGCCACAAGTCAGTTTCCCTGTCCTCTTAGGTTCCTCTCCTACATGCCCGGGCATGTACCTAATCCCTTTCATTTTTTCTCACTGACCTCATCTGAGATAGATGAACCACTAGAAAGCAGGGTGGAGGCCCCAGCCTGGGCTGTGGAATGCTGTTTTGATCTCCTTTCCCTCT	+	chr1_54422888_54423136_ETS1_HUMAN.H11MO.0.A_center125	ETS	CTCCATTTCCTGTCAC	125	P53	ACATGCCCGGGCATGT	414	442	429	1554	1239	1984	3.7819	2.82752	0.95438	1.34766	-1.47986	2.43424
chr1_55894724_55894972_FOSL1_MA0477.1_center125_to_CREB1_MA0018.3	chr1_55894724_55894972	TATCTGTGTGACCTCAGAAAAGTCAATCTCCTAGATCCCTCCCAGCTCTGACATTCTGCTATTAATATTTTGCTACCTCTTTTACCCGGTATCTACAGCTCATGTCCTGGCCCACCCAGCATGACGTCAGCCTCAAGAACCTCAGGCACTCGCTCACTCCAAGGATTTTCCATTCTTTGGAGAACCTTTCACTCTTCAAATATTGTCTTTCTGATGTGGTCCTTGGCAGCGTCATAGATCTCTCCAGCT	+	chr1_55894724_55894972_FOSL1_MA0477.1_center125	AP-1	TGAGTCAT	125	CREB1	TGACGTCA	423	403	433	184	166	218	0.760023	3.21815	-2.45812	0.187707	-3.03044	0.572317
chr1_55894724_55894972_FOSL1_MA0477.1_center125_to_E2F1_HUMAN.H11MO.0.A	chr1_55894724_55894972	TATCTGTGTGACCTCAGAAAAGTCAATCTCCTAGATCCCTCCCAGCTCTGACATTCTGCTATTAATATTTTGCTACCTCTTTTACCCGGTATCTACAGCTCATGTCCTGGCCCACCCAGCAGGCGGGAAGCCTCAAGAACCTCAGGCACTCGCTCACTCCAAGGATTTTCCATTCTTTGGAGAACCTTTCACTCTTCAAATATTGTCTTTCTGATGTGGTCCTTGGCAGCGTCATAGATCTCTCCAGCT	+	chr1_55894724_55894972_FOSL1_MA0477.1_center125	AP-1	TGAGTCAT	125	E2F1	GGCGGGAA	363	400	385	153	132	191	0.625062	3.21815	-2.59309	0.187707	-3.03044	0.437355
chr1_55894724_55894972_FOSL1_MA0477.1_center125_to_EGR1_C2H2_1	chr1_55894724_55894972	TATCTGTGTGACCTCAGAAAAGTCAATCTCCTAGATCCCTCCCAGCTCTGACATTCTGCTATTAATATTTTGCTACCTCTTTTACCCGGTATCTACAGCTCATGTCCTGGCCCACCCAGACGCCCACGCACCTCAAGAACCTCAGGCACTCGCTCACTCCAAGGATTTTCCATTCTTTGGAGAACCTTTCACTCTTCAAATATTGTCTTTCTGATGTGGTCCTTGGCAGCGTCATAGATCTCTCCAGCT	+	chr1_55894724_55894972_FOSL1_MA0477.1_center125	AP-1	CATGAGTCATG	125	EGR1	ACGCCCACGCA	766	826	851	295	283	476	0.653217	3.21815	-2.56493	0.187707	-3.03044	0.46551
chr1_55894724_55894972_FOSL1_MA0477.1_center125_to_ETS1_HUMAN.H11MO.0.A	chr1_55894724_55894972	TATCTGTGTGACCTCAGAAAAGTCAATCTCCTAGATCCCTCCCAGCTCTGACATTCTGCTATTAATATTTTGCTACCTCTTTTACCCGGTATCTACAGCTCATGTCCTGGCCCACCCAGCACCGGAAGTGCCTCAAGAACCTCAGGCACTCGCTCACTCCAAGGATTTTCCATTCTTTGGAGAACCTTTCACTCTTCAAATATTGTCTTTCTGATGTGGTCCTTGGCAGCGTCATAGATCTCTCCAGCT	+	chr1_55894724_55894972_FOSL1_MA0477.1_center125	AP-1	ATGAGTCAT	125	ETS	ACCGGAAGT	383	387	366	201	181	290	1.11791	3.21815	-2.10024	0.187707	-3.03044	0.930199
chr1_55894724_55894972_FOSL1_MA0477.1_center125_to_MECP2_HUMAN.H11MO.0.C	chr1_55894724_55894972	TATCTGTGTGACCTCAGAAAAGTCAATCTCCTAGATCCCTCCCAGCTCTGACATTCTGCTATTAATATTTTGCTACCTCTTTTACCCGGTATCTACAGCTCATGTCCTGGCCCACCCAGCACCCGGAGTGCCTCAAGAACCTCAGGCACTCGCTCACTCCAAGGATTTTCCATTCTTTGGAGAACCTTTCACTCTTCAAATATTGTCTTTCTGATGTGGTCCTTGGCAGCGTCATAGATCTCTCCAGCT	+	chr1_55894724_55894972_FOSL1_MA0477.1_center125	AP-1	TGAGTCA	125	MECP2	CCCGGAG	354	419	379	152	111	218	0.596564	3.21815	-2.62158	0.187707	-3.03044	0.408857
chr1_55894724_55894972_FOSL1_MA0477.1_center125_to_TP53_MA0106.3	chr1_55894724_55894972	TATCTGTGTGACCTCAGAAAAGTCAATCTCCTAGATCCCTCCCAGCTCTGACATTCTGCTATTAATATTTTGCTACCTCTTTTACCCGGTATCTACAGCTCATGTCCTGGCCCACCCACATGCCCGGGCATGTCAAGAACCTCAGGCACTCGCTCACTCCAAGGATTTTCCATTCTTTGGAGAACCTTTCACTCTTCAAATATTGTCTTTCTGATGTGGTCCTTGGCAGCGTCATAGATCTCTCCAGCT	+	chr1_55894724_55894972_FOSL1_MA0477.1_center125	AP-1	AGCATGAGTCATGCCT	125	P53	ACATGCCCGGGCATGT	550	606	557	1611	1314	2061	3.43125	3.21815	0.213103	0.187707	-3.03044	3.24354
chr1_59221283_59221531_ETS1_HUMAN.H11MO.0.A_center126_to_CREB1_MA0018.3	chr1_59221283_59221531	GCCCAGAATTATGGAGCCTAAGAGGCAGCACCTCTGCTTTCTGAAGAGGAAGCCGTAGTGCCGTGGACTTCACCACGTGCACAGTGGCTGCATCCAGACCTGAATGCCCCTCTCATTACTCATGACGTCAGAGCTTTGAACACTTCACACAGGAAGATGACTCGCTCCTCCAACAAGATGCAGAAAGTCTTTCCAAGCAAATGACTTGAAGTGTTTAAATATTCTGTTTCTTAGTCTGCTTTTTTTCTG	+	chr1_59221283_59221531_ETS1_HUMAN.H11MO.0.A_center126	ETS	CCGGAAGT	126	CREB1	TGACGTCA	103	88	90	67	55	88	1.45311	3.59416	-2.14105	2.15916	-1.435	-0.706049
chr1_59221283_59221531_ETS1_HUMAN.H11MO.0.A_center126_to_EGR1_C2H2_1	chr1_59221283_59221531	GCCCAGAATTATGGAGCCTAAGAGGCAGCACCTCTGCTTTCTGAAGAGGAAGCCGTAGTGCCGTGGACTTCACCACGTGCACAGTGGCTGCATCCAGACCTGAATGCCCCTCTCATTACTACGCCCACGCAAGCTTTGAACACTTCACACAGGAAGATGACTCGCTCCTCCAACAAGATGCAGAAAGTCTTTCCAAGCAAATGACTTGAAGTGTTTAAATATTCTGTTTCTTAGTCTGCTTTTTTTCTG	+	chr1_59221283_59221531_ETS1_HUMAN.H11MO.0.A_center126	ETS	CACCGGAAGTG	126	EGR1	ACGCCCACGCA	155	187	189	139	106	189	1.57949	3.59416	-2.01467	2.15916	-1.435	-0.579669
chr1_59221283_59221531_ETS1_HUMAN.H11MO.0.A_center126_to_FOSL1_MA0477.1	chr1_59221283_59221531	GCCCAGAATTATGGAGCCTAAGAGGCAGCACCTCTGCTTTCTGAAGAGGAAGCCGTAGTGCCGTGGACTTCACCACGTGCACAGTGGCTGCATCCAGACCTGAATGCCCCTCTCATTACTCGTGACTCATGAGCTTTGAACACTTCACACAGGAAGATGACTCGCTCCTCCAACAAGATGCAGAAAGTCTTTCCAAGCAAATGACTTGAAGTGTTTAAATATTCTGTTTCTTAGTCTGCTTTTTTTCTG	+	chr1_59221283_59221531_ETS1_HUMAN.H11MO.0.A_center126	ETS	ACCGGAAGT	126	AP-1	GTGACTCAT	614	649	644	523	444	863	1.78739	3.59416	-1.80677	2.15916	-1.435	-0.371772
chr1_59221283_59221531_ETS1_HUMAN.H11MO.0.A_center126_to_MAFK_MA0496.2	chr1_59221283_59221531	GCCCAGAATTATGGAGCCTAAGAGGCAGCACCTCTGCTTTCTGAAGAGGAAGCCGTAGTGCCGTGGACTTCACCACGTGCACAGTGGCTGCATCCAGACCTGAATGCCCCTCTCATTACTGCTGAGTCAGCAGCTTTGAACACTTCACACAGGAAGATGACTCGCTCCTCCAACAAGATGCAGAAAGTCTTTCCAAGCAAATGACTTGAAGTGTTTAAATATTCTGTTTCTTAGTCTGCTTTTTTTCTG	+	chr1_59221283_59221531_ETS1_HUMAN.H11MO.0.A_center126	ETS	TCACCGGAAGTGA	126	MAF	TGCTGAGTCAGCA	326	299	327	174	136	322	1.22552	3.59416	-2.36863	2.15916	-1.435	-0.933639
chr1_59221283_59221531_ETS1_HUMAN.H11MO.0.A_center126_to_MECP2_HUMAN.H11MO.0.C	chr1_59221283_59221531	GCCCAGAATTATGGAGCCTAAGAGGCAGCACCTCTGCTTTCTGAAGAGGAAGCCGTAGTGCCGTGGACTTCACCACGTGCACAGTGGCTGCATCCAGACCTGAATGCCCCTCTCATTACTCACCCGGAGTGAGCTTTGAACACTTCACACAGGAAGATGACTCGCTCCTCCAACAAGATGCAGAAAGTCTTTCCAAGCAAATGACTTGAAGTGTTTAAATATTCTGTTTCTTAGTCTGCTTTTTTTCTG	+	chr1_59221283_59221531_ETS1_HUMAN.H11MO.0.A_center126	ETS	CCGGAAG	126	MECP2	CCCGGAG	493	564	523	685	549	937	2.33427	3.59416	-1.25989	2.15916	-1.435	0.175105
chr1_59221283_59221531_ETS1_HUMAN.H11MO.0.A_center126_to_TP53_MA0106.3	chr1_59221283_59221531	GCCCAGAATTATGGAGCCTAAGAGGCAGCACCTCTGCTTTCTGAAGAGGAAGCCGTAGTGCCGTGGACTTCACCACGTGCACAGTGGCTGCATCCAGACCTGAATGCCCCTCTCATTAACATGCCCGGGCATGTTTTGAACACTTCACACAGGAAGATGACTCGCTCCTCCAACAAGATGCAGAAAGTCTTTCCAAGCAAATGACTTGAAGTGTTTAAATATTCTGTTTCTTAGTCTGCTTTTTTTCTG	+	chr1_59221283_59221531_ETS1_HUMAN.H11MO.0.A_center126	ETS	CTCACCGGAAGTGAGC	126	P53	ACATGCCCGGGCATGT	231	230	213	1005	702	1248	4.00816	3.59416	0.414008	2.15916	-1.435	1.849
chr1_59221283_59221531_ETS1_HUMAN.H11MO.0.A_center153_to_CREB1_MA0018.3	chr1_59221283_59221531	GCCCAGAATTATGGAGCCTAAGAGGCAGCACCTCTGCTTTCTGAAGAGGAAGCCGTAGTGCCGTGGACTTCACCACGTGCACAGTGGCTGCATCCAGACCTGAATGCCCCTCTCATTACTCACCGGAAGTGAGCTTTGAACACTTCACATGACGTCATGACTCGCTCCTCCAACAAGATGCAGAAAGTCTTTCCAAGCAAATGACTTGAAGTGTTTAAATATTCTGTTTCTTAGTCTGCTTTTTTTCTG	+	chr1_59221283_59221531_ETS1_HUMAN.H11MO.0.A_center153	ETS	CAGGAAGA	153	CREB1	TGACGTCA	181	191	198	464	405	464	3.16459	3.59416	-0.429564	2.39929	-1.19486	0.7653
chr1_59221283_59221531_ETS1_HUMAN.H11MO.0.A_center153_to_E2F1_HUMAN.H11MO.0.A	chr1_59221283_59221531	GCCCAGAATTATGGAGCCTAAGAGGCAGCACCTCTGCTTTCTGAAGAGGAAGCCGTAGTGCCGTGGACTTCACCACGTGCACAGTGGCTGCATCCAGACCTGAATGCCCCTCTCATTACTCACCGGAAGTGAGCTTTGAACACTTCACAGGCGGGAATGACTCGCTCCTCCAACAAGATGCAGAAAGTCTTTCCAAGCAAATGACTTGAAGTGTTTAAATATTCTGTTTCTTAGTCTGCTTTTTTTCTG	+	chr1_59221283_59221531_ETS1_HUMAN.H11MO.0.A_center153	ETS	CAGGAAGA	153	E2F1	GGCGGGAA	473	512	496	645	579	888	2.39935	3.59416	-1.19481	2.39929	-1.19486	5.69443e-05
chr1_59221283_59221531_ETS1_HUMAN.H11MO.0.A_center153_to_EGR1_C2H2_1	chr1_59221283_59221531	GCCCAGAATTATGGAGCCTAAGAGGCAGCACCTCTGCTTTCTGAAGAGGAAGCCGTAGTGCCGTGGACTTCACCACGTGCACAGTGGCTGCATCCAGACCTGAATGCCCCTCTCATTACTCACCGGAAGTGAGCTTTGAACACTTCAACGCCCACGCAGACTCGCTCCTCCAACAAGATGCAGAAAGTCTTTCCAAGCAAATGACTTGAAGTGTTTAAATATTCTGTTTCTTAGTCTGCTTTTTTTCTG	+	chr1_59221283_59221531_ETS1_HUMAN.H11MO.0.A_center153	ETS	CACAGGAAGAT	153	EGR1	ACGCCCACGCA	285	304	315	848	719	1054	3.43548	3.59416	-0.158677	2.39929	-1.19486	1.03619
chr1_59221283_59221531_ETS1_HUMAN.H11MO.0.A_center153_to_FOSL1_MA0477.1	chr1_59221283_59221531	GCCCAGAATTATGGAGCCTAAGAGGCAGCACCTCTGCTTTCTGAAGAGGAAGCCGTAGTGCCGTGGACTTCACCACGTGCACAGTGGCTGCATCCAGACCTGAATGCCCCTCTCATTACTCACCGGAAGTGAGCTTTGAACACTTCACGTGACTCATTGACTCGCTCCTCCAACAAGATGCAGAAAGTCTTTCCAAGCAAATGACTTGAAGTGTTTAAATATTCTGTTTCTTAGTCTGCTTTTTTTCTG	+	chr1_59221283_59221531_ETS1_HUMAN.H11MO.0.A_center153	ETS	ACAGGAAGA	153	AP-1	GTGACTCAT	541	581	555	1439	1348	1747	3.35069	3.59416	-0.243462	2.39929	-1.19486	0.951402
chr1_59221283_59221531_ETS1_HUMAN.H11MO.0.A_center153_to_MAFK_MA0496.2	chr1_59221283_59221531	GCCCAGAATTATGGAGCCTAAGAGGCAGCACCTCTGCTTTCTGAAGAGGAAGCCGTAGTGCCGTGGACTTCACCACGTGCACAGTGGCTGCATCCAGACCTGAATGCCCCTCTCATTACTCACCGGAAGTGAGCTTTGAACACTTCTGCTGAGTCAGCAACTCGCTCCTCCAACAAGATGCAGAAAGTCTTTCCAAGCAAATGACTTGAAGTGTTTAAATATTCTGTTTCTTAGTCTGCTTTTTTTCTG	+	chr1_59221283_59221531_ETS1_HUMAN.H11MO.0.A_center153	ETS	ACACAGGAAGATG	153	MAF	TGCTGAGTCAGCA	320	326	338	586	522	738	2.8095	3.59416	-0.784655	2.39929	-1.19486	0.410209
chr1_59221283_59221531_ETS1_HUMAN.H11MO.0.A_center153_to_MECP2_HUMAN.H11MO.0.C	chr1_59221283_59221531	GCCCAGAATTATGGAGCCTAAGAGGCAGCACCTCTGCTTTCTGAAGAGGAAGCCGTAGTGCCGTGGACTTCACCACGTGCACAGTGGCTGCATCCAGACCTGAATGCCCCTCTCATTACTCACCGGAAGTGAGCTTTGAACACTTCACACCCGGAGATGACTCGCTCCTCCAACAAGATGCAGAAAGTCTTTCCAAGCAAATGACTTGAAGTGTTTAAATATTCTGTTTCTTAGTCTGCTTTTTTTCTG	+	chr1_59221283_59221531_ETS1_HUMAN.H11MO.0.A_center153	ETS	CAGGAAG	153	MECP2	CCCGGAG	608	619	606	1104	992	1076	2.73845	3.59416	-0.85571	2.39929	-1.19486	0.339154
chr1_59221283_59221531_ETS1_HUMAN.H11MO.0.A_center153_to_TP53_MA0106.3	chr1_59221283_59221531	GCCCAGAATTATGGAGCCTAAGAGGCAGCACCTCTGCTTTCTGAAGAGGAAGCCGTAGTGCCGTGGACTTCACCACGTGCACAGTGGCTGCATCCAGACCTGAATGCCCCTCTCATTACTCACCGGAAGTGAGCTTTGAACACTTACATGCCCGGGCATGTTCGCTCCTCCAACAAGATGCAGAAAGTCTTTCCAAGCAAATGACTTGAAGTGTTTAAATATTCTGTTTCTTAGTCTGCTTTTTTTCTG	+	chr1_59221283_59221531_ETS1_HUMAN.H11MO.0.A_center153	ETS	CACACAGGAAGATGAC	153	P53	ACATGCCCGGGCATGT	517	556	556	2531	2163	3465	4.20797	3.59416	0.613818	2.39929	-1.19486	1.80868
chr1_59221283_59221531_MECP2_HUMAN.H11MO.0.C_center125_to_CREB1_MA0018.3	chr1_59221283_59221531	GCCCAGAATTATGGAGCCTAAGAGGCAGCACCTCTGCTTTCTGAAGAGGAAGCCGTAGTGCCGTGGACTTCACCACGTGCACAGTGGCTGCATCCAGACCTGAATGCCCCTCTCATTACTCTGACGTCATGAGCTTTGAACACTTCACACAGGAAGATGACTCGCTCCTCCAACAAGATGCAGAAAGTCTTTCCAAGCAAATGACTTGAAGTGTTTAAATATTCTGTTTCTTAGTCTGCTTTTTTTCTG	+	chr1_59221283_59221531_MECP2_HUMAN.H11MO.0.C_center125	MECP2	ACCGGAAG	125	CREB1	TGACGTCA	312	312	349	231	188	318	1.47346	3.59416	-2.12069	2.02369	-1.57047	-0.550227
chr1_59221283_59221531_MECP2_HUMAN.H11MO.0.C_center125_to_E2F1_HUMAN.H11MO.0.A	chr1_59221283_59221531	GCCCAGAATTATGGAGCCTAAGAGGCAGCACCTCTGCTTTCTGAAGAGGAAGCCGTAGTGCCGTGGACTTCACCACGTGCACAGTGGCTGCATCCAGACCTGAATGCCCCTCTCATTACTCGGCGGGAATGAGCTTTGAACACTTCACACAGGAAGATGACTCGCTCCTCCAACAAGATGCAGAAAGTCTTTCCAAGCAAATGACTTGAAGTGTTTAAATATTCTGTTTCTTAGTCTGCTTTTTTTCTG	+	chr1_59221283_59221531_MECP2_HUMAN.H11MO.0.C_center125	MECP2	ACCGGAAG	125	E2F1	GGCGGGAA	564	659	618	368	319	729	1.43748	3.59416	-2.15667	2.02369	-1.57047	-0.586206
chr1_59221283_59221531_MECP2_HUMAN.H11MO.0.C_center125_to_EGR1_C2H2_1	chr1_59221283_59221531	GCCCAGAATTATGGAGCCTAAGAGGCAGCACCTCTGCTTTCTGAAGAGGAAGCCGTAGTGCCGTGGACTTCACCACGTGCACAGTGGCTGCATCCAGACCTGAATGCCCCTCTCATTACACGCCCACGCAGAGCTTTGAACACTTCACACAGGAAGATGACTCGCTCCTCCAACAAGATGCAGAAAGTCTTTCCAAGCAAATGACTTGAAGTGTTTAAATATTCTGTTTCTTAGTCTGCTTTTTTTCTG	+	chr1_59221283_59221531_MECP2_HUMAN.H11MO.0.C_center125	MECP2	TCACCGGAAGT	125	EGR1	ACGCCCACGCA	275	296	283	186	157	319	1.47228	3.59416	-2.12188	2.02369	-1.57047	-0.551412
chr1_59221283_59221531_MECP2_HUMAN.H11MO.0.C_center125_to_FOSL1_MA0477.1	chr1_59221283_59221531	GCCCAGAATTATGGAGCCTAAGAGGCAGCACCTCTGCTTTCTGAAGAGGAAGCCGTAGTGCCGTGGACTTCACCACGTGCACAGTGGCTGCATCCAGACCTGAATGCCCCTCTCATTACTGTGACTCATTGAGCTTTGAACACTTCACACAGGAAGATGACTCGCTCCTCCAACAAGATGCAGAAAGTCTTTCCAAGCAAATGACTTGAAGTGTTTAAATATTCTGTTTCTTAGTCTGCTTTTTTTCTG	+	chr1_59221283_59221531_MECP2_HUMAN.H11MO.0.C_center125	MECP2	CACCGGAAG	125	AP-1	GTGACTCAT	265	293	278	233	186	422	1.83247	3.59416	-1.76169	2.02369	-1.57047	-0.191226
chr1_59221283_59221531_MECP2_HUMAN.H11MO.0.C_center125_to_MAFK_MA0496.2	chr1_59221283_59221531	GCCCAGAATTATGGAGCCTAAGAGGCAGCACCTCTGCTTTCTGAAGAGGAAGCCGTAGTGCCGTGGACTTCACCACGTGCACAGTGGCTGCATCCAGACCTGAATGCCCCTCTCATTATGCTGAGTCAGCAAGCTTTGAACACTTCACACAGGAAGATGACTCGCTCCTCCAACAAGATGCAGAAAGTCTTTCCAAGCAAATGACTTGAAGTGTTTAAATATTCTGTTTCTTAGTCTGCTTTTTTTCTG	+	chr1_59221283_59221531_MECP2_HUMAN.H11MO.0.C_center125	MECP2	CTCACCGGAAGTG	125	MAF	TGCTGAGTCAGCA	336	324	309	187	147	303	1.23477	3.59416	-2.35939	2.02369	-1.57047	-0.788921
chr1_59221283_59221531_MECP2_HUMAN.H11MO.0.C_center125_to_TP53_MA0106.3	chr1_59221283_59221531	GCCCAGAATTATGGAGCCTAAGAGGCAGCACCTCTGCTTTCTGAAGAGGAAGCCGTAGTGCCGTGGACTTCACCACGTGCACAGTGGCTGCATCCAGACCTGAATGCCCCTCTCATTACATGCCCGGGCATGTCTTTGAACACTTCACACAGGAAGATGACTCGCTCCTCCAACAAGATGCAGAAAGTCTTTCCAAGCAAATGACTTGAAGTGTTTAAATATTCTGTTTCTTAGTCTGCTTTTTTTCTG	+	chr1_59221283_59221531_MECP2_HUMAN.H11MO.0.C_center125	MECP2	ACTCACCGGAAGTGAG	125	P53	ACATGCCCGGGCATGT	192	194	183	842	604	1086	4.026	3.59416	0.431842	2.02369	-1.57047	2.00231
chr1_68152384_68152632_TP53_MA0106.3_center85_to_E2F1_HUMAN.H11MO.0.A	chr1_68152384_68152632	TTTGTCCGACTAGAGTGTGGCTGGACTTTCAGCCGAGATGTGCTAGTTTCATCACCAGGATTTTCTGTGGTACAGAACATGGGCGGGAATGCTGGGGACTGCCAGCAGCGGAAGAGATCCCTGTGAGTCAGCAGTCAGCCCAGCTACTCCCTACCTACATCTGCACTGCCTCCCGTGACTAATTCCTTTAGCAGGGCAGATTAGATAAAGCCAAATGAATTCCTGGCTCACCCCTCATTAAGGAGTCAG	+	chr1_68152384_68152632_TP53_MA0106.3_center85	P53	TCTAAGCA	85	E2F1	GGCGGGAA	252	236	243	642	568	594	3.25508	4.55266	-1.29758	1.16591	-3.38675	2.08918
chr1_68152384_68152632_TP53_MA0106.3_center85_to_EGR1_C2H2_1	chr1_68152384_68152632	TTTGTCCGACTAGAGTGTGGCTGGACTTTCAGCCGAGATGTGCTAGTTTCATCACCAGGATTTTCTGTGGTACAGAACAACGCCCACGCAGCTGGGGACTGCCAGCAGCGGAAGAGATCCCTGTGAGTCAGCAGTCAGCCCAGCTACTCCCTACCTACATCTGCACTGCCTCCCGTGACTAATTCCTTTAGCAGGGCAGATTAGATAAAGCCAAATGAATTCCTGGCTCACCCCTCATTAAGGAGTCAG	+	chr1_68152384_68152632_TP53_MA0106.3_center85	P53	TGTCTAAGCAT	85	EGR1	ACGCCCACGCA	224	236	268	1364	1218	937	4.27546	4.55266	-0.2772	1.16591	-3.38675	3.10955
chr1_68152384_68152632_TP53_MA0106.3_center85_to_ETS1_HUMAN.H11MO.0.A	chr1_68152384_68152632	TTTGTCCGACTAGAGTGTGGCTGGACTTTCAGCCGAGATGTGCTAGTTTCATCACCAGGATTTTCTGTGGTACAGAACATACCGGAAGTTGCTGGGGACTGCCAGCAGCGGAAGAGATCCCTGTGAGTCAGCAGTCAGCCCAGCTACTCCCTACCTACATCTGCACTGCCTCCCGTGACTAATTCCTTTAGCAGGGCAGATTAGATAAAGCCAAATGAATTCCTGGCTCACCCCTCATTAAGGAGTCAG	+	chr1_68152384_68152632_TP53_MA0106.3_center85	P53	GTCTAAGCA	85	ETS	ACCGGAAGT	167	152	170	790	643	607	4.03296	4.55266	-0.519702	1.16591	-3.38675	2.86705
chr1_68152384_68152632_TP53_MA0106.3_center85_to_FOSL1_MA0477.1	chr1_68152384_68152632	TTTGTCCGACTAGAGTGTGGCTGGACTTTCAGCCGAGATGTGCTAGTTTCATCACCAGGATTTTCTGTGGTACAGAACATGTGACTCATTGCTGGGGACTGCCAGCAGCGGAAGAGATCCCTGTGAGTCAGCAGTCAGCCCAGCTACTCCCTACCTACATCTGCACTGCCTCCCGTGACTAATTCCTTTAGCAGGGCAGATTAGATAAAGCCAAATGAATTCCTGGCTCACCCCTCATTAAGGAGTCAG	+	chr1_68152384_68152632_TP53_MA0106.3_center85	P53	GTCTAAGCA	85	AP-1	GTGACTCAT	375	438	430	3788	3379	2881	5.00395	4.55266	0.451288	1.16591	-3.38675	3.83804
chr1_68152384_68152632_TP53_MA0106.3_center85_to_MAFK_MA0496.2	chr1_68152384_68152632	TTTGTCCGACTAGAGTGTGGCTGGACTTTCAGCCGAGATGTGCTAGTTTCATCACCAGGATTTTCTGTGGTACAGAACTGCTGAGTCAGCACTGGGGACTGCCAGCAGCGGAAGAGATCCCTGTGAGTCAGCAGTCAGCCCAGCTACTCCCTACCTACATCTGCACTGCCTCCCGTGACTAATTCCTTTAGCAGGGCAGATTAGATAAAGCCAAATGAATTCCTGGCTCACCCCTCATTAAGGAGTCAG	+	chr1_68152384_68152632_TP53_MA0106.3_center85	P53	ATGTCTAAGCATG	85	MAF	TGCTGAGTCAGCA	147	201	176	702	588	573	3.80091	4.55266	-0.751754	1.16591	-3.38675	2.635
chr1_68850142_68850390_FOSL1_MA0477.1_center54_to_CREB1_MA0018.3	chr1_68850142_68850390	CATCACGAAATCTGTTCTCATTCTAATTTAGAATGCAGGAACTTGTGTGGTGACGTCAATGTTTGAAAAGCTCAAATTAAGTAGTGGTGATCTCAACCATGATTCACTGATGAGAACTGGAAAGTGATTCATCTCCTTTATGTGCTTGTCCTTGGGAGTCTCCAGGCTTAAAGGTCTTCCAGAAACACACTGCACTCAAGGAAAGACACTGGGCCCTCCTGTGGTGGTATTTTAGCAATTACACAGAGG	+	chr1_68850142_68850390_FOSL1_MA0477.1_center54	AP-1	TGACTCAT	54	CREB1	TGACGTCA	121	135	129	166	168	146	2.28771	3.28964	-1.00193	0.536096	-2.75354	1.75161
chr1_68850142_68850390_FOSL1_MA0477.1_center54_to_E2F1_HUMAN.H11MO.0.A	chr1_68850142_68850390	CATCACGAAATCTGTTCTCATTCTAATTTAGAATGCAGGAACTTGTGTGGGGCGGGAAATGTTTGAAAAGCTCAAATTAAGTAGTGGTGATCTCAACCATGATTCACTGATGAGAACTGGAAAGTGATTCATCTCCTTTATGTGCTTGTCCTTGGGAGTCTCCAGGCTTAAAGGTCTTCCAGAAACACACTGCACTCAAGGAAAGACACTGGGCCCTCCTGTGGTGGTATTTTAGCAATTACACAGAGG	+	chr1_68850142_68850390_FOSL1_MA0477.1_center54	AP-1	TGACTCAT	54	E2F1	GGCGGGAA	275	254	239	83	83	115	0.436252	3.28964	-2.85338	0.536096	-2.75354	-0.0998448
chr1_68850142_68850390_FOSL1_MA0477.1_center54_to_EGR1_C2H2_1	chr1_68850142_68850390	CATCACGAAATCTGTTCTCATTCTAATTTAGAATGCAGGAACTTGTGTACGCCCACGCATGTTTGAAAAGCTCAAATTAAGTAGTGGTGATCTCAACCATGATTCACTGATGAGAACTGGAAAGTGATTCATCTCCTTTATGTGCTTGTCCTTGGGAGTCTCCAGGCTTAAAGGTCTTCCAGAAACACACTGCACTCAAGGAAAGACACTGGGCCCTCCTGTGGTGGTATTTTAGCAATTACACAGAGG	+	chr1_68850142_68850390_FOSL1_MA0477.1_center54	AP-1	GGTGACTCATA	54	EGR1	ACGCCCACGCA	264	257	265	279	268	306	2.04905	3.28964	-1.24058	0.536096	-2.75354	1.51296
chr1_68850142_68850390_FOSL1_MA0477.1_center54_to_ETS1_HUMAN.H11MO.0.A	chr1_68850142_68850390	CATCACGAAATCTGTTCTCATTCTAATTTAGAATGCAGGAACTTGTGTGACCGGAAGTATGTTTGAAAAGCTCAAATTAAGTAGTGGTGATCTCAACCATGATTCACTGATGAGAACTGGAAAGTGATTCATCTCCTTTATGTGCTTGTCCTTGGGAGTCTCCAGGCTTAAAGGTCTTCCAGAAACACACTGCACTCAAGGAAAGACACTGGGCCCTCCTGTGGTGGTATTTTAGCAATTACACAGAGG	+	chr1_68850142_68850390_FOSL1_MA0477.1_center54	AP-1	GTGACTCAT	54	ETS	ACCGGAAGT	209	227	200	222	185	223	1.91445	3.28964	-1.37519	0.536096	-2.75354	1.37835
chr1_68850142_68850390_FOSL1_MA0477.1_center54_to_MECP2_HUMAN.H11MO.0.C	chr1_68850142_68850390	CATCACGAAATCTGTTCTCATTCTAATTTAGAATGCAGGAACTTGTGTGGCCCGGAGTATGTTTGAAAAGCTCAAATTAAGTAGTGGTGATCTCAACCATGATTCACTGATGAGAACTGGAAAGTGATTCATCTCCTTTATGTGCTTGTCCTTGGGAGTCTCCAGGCTTAAAGGTCTTCCAGAAACACACTGCACTCAAGGAAAGACACTGGGCCCTCCTGTGGTGGTATTTTAGCAATTACACAGAGG	+	chr1_68850142_68850390_FOSL1_MA0477.1_center54	AP-1	TGACTCA	54	MECP2	CCCGGAG	255	260	289	91	100	111	0.508685	3.28964	-2.78095	0.536096	-2.75354	-0.0274109
chr1_68850142_68850390_FOSL1_MA0477.1_center54_to_TP53_MA0106.3	chr1_68850142_68850390	CATCACGAAATCTGTTCTCATTCTAATTTAGAATGCAGGAACTTGTACATGCCCGGGCATGTTTGAAAAGCTCAAATTAAGTAGTGGTGATCTCAACCATGATTCACTGATGAGAACTGGAAAGTGATTCATCTCCTTTATGTGCTTGTCCTTGGGAGTCTCCAGGCTTAAAGGTCTTCCAGAAACACACTGCACTCAAGGAAAGACACTGGGCCCTCCTGTGGTGGTATTTTAGCAATTACACAGAGG	+	chr1_68850142_68850390_FOSL1_MA0477.1_center54	AP-1	GTGGTGACTCATATGT	54	P53	ACATGCCCGGGCATGT	276	279	241	1076	941	1298	3.96438	3.28964	0.674744	0.536096	-2.75354	3.42828
chr1_68850142_68850390_TP53_MA0106.3_center39_to_E2F1_HUMAN.H11MO.0.A	chr1_68850142_68850390	CATCACGAAATCTGTTCTCATTCTAATTTAGAATGGGCGGGAATGTGTGGTGACTCATATGTTTGAAAAGCTCAAATTAAGTAGTGGTGATCTCAACCATGATTCACTGATGAGAACTGGAAAGTGATTCATCTCCTTTATGTGCTTGTCCTTGGGAGTCTCCAGGCTTAAAGGTCTTCCAGAAACACACTGCACTCAAGGAAAGACACTGGGCCCTCCTGTGGTGGTATTTTAGCAATTACACAGAGG	+	chr1_68850142_68850390_TP53_MA0106.3_center39	P53	CAGGAACT	39	E2F1	GGCGGGAA	156	175	149	320	297	295	2.88266	3.28964	-0.406973	1.74037	-1.54927	1.1423
chr1_68850142_68850390_TP53_MA0106.3_center39_to_EGR1_C2H2_1	chr1_68850142_68850390	CATCACGAAATCTGTTCTCATTCTAATTTAGAAACGCCCACGCAGTGTGGTGACTCATATGTTTGAAAAGCTCAAATTAAGTAGTGGTGATCTCAACCATGATTCACTGATGAGAACTGGAAAGTGATTCATCTCCTTTATGTGCTTGTCCTTGGGAGTCTCCAGGCTTAAAGGTCTTCCAGAAACACACTGCACTCAAGGAAAGACACTGGGCCCTCCTGTGGTGGTATTTTAGCAATTACACAGAGG	+	chr1_68850142_68850390_TP53_MA0106.3_center39	P53	TGCAGGAACTT	39	EGR1	ACGCCCACGCA	131	167	151	673	615	529	4.00193	3.28964	0.712294	1.74037	-1.54927	2.26156
chr1_68850142_68850390_TP53_MA0106.3_center39_to_ETS1_HUMAN.H11MO.0.A	chr1_68850142_68850390	CATCACGAAATCTGTTCTCATTCTAATTTAGAATACCGGAAGTTGTGTGGTGACTCATATGTTTGAAAAGCTCAAATTAAGTAGTGGTGATCTCAACCATGATTCACTGATGAGAACTGGAAAGTGATTCATCTCCTTTATGTGCTTGTCCTTGGGAGTCTCCAGGCTTAAAGGTCTTCCAGAAACACACTGCACTCAAGGAAAGACACTGGGCCCTCCTGTGGTGGTATTTTAGCAATTACACAGAGG	+	chr1_68850142_68850390_TP53_MA0106.3_center39	P53	GCAGGAACT	39	ETS	ACCGGAAGT	165	161	143	777	715	527	4.10817	3.28964	0.818539	1.74037	-1.54927	2.36781
chr1_68850142_68850390_TP53_MA0106.3_center39_to_FOSL1_MA0477.1	chr1_68850142_68850390	CATCACGAAATCTGTTCTCATTCTAATTTAGAATGTGACTCATTGTGTGGTGACTCATATGTTTGAAAAGCTCAAATTAAGTAGTGGTGATCTCAACCATGATTCACTGATGAGAACTGGAAAGTGATTCATCTCCTTTATGTGCTTGTCCTTGGGAGTCTCCAGGCTTAAAGGTCTTCCAGAAACACACTGCACTCAAGGAAAGACACTGGGCCCTCCTGTGGTGGTATTTTAGCAATTACACAGAGG	+	chr1_68850142_68850390_TP53_MA0106.3_center39	P53	GCAGGAACT	39	AP-1	GTGACTCAT	164	168	164	1040	1038	939	4.57667	3.28964	1.28704	1.74037	-1.54927	2.8363
chr1_68850142_68850390_TP53_MA0106.3_center39_to_MAFK_MA0496.2	chr1_68850142_68850390	CATCACGAAATCTGTTCTCATTCTAATTTAGATGCTGAGTCAGCATGTGGTGACTCATATGTTTGAAAAGCTCAAATTAAGTAGTGGTGATCTCAACCATGATTCACTGATGAGAACTGGAAAGTGATTCATCTCCTTTATGTGCTTGTCCTTGGGAGTCTCCAGGCTTAAAGGTCTTCCAGAAACACACTGCACTCAAGGAAAGACACTGGGCCCTCCTGTGGTGGTATTTTAGCAATTACACAGAGG	+	chr1_68850142_68850390_TP53_MA0106.3_center39	P53	ATGCAGGAACTTG	39	MAF	TGCTGAGTCAGCA	156	142	139	608	583	485	3.92206	3.28964	0.632421	1.74037	-1.54927	2.18169
chr1_69520969_69521217_EGR1_C2H2_1_center165_to_CREB1_MA0018.3	chr1_69520969_69521217	ACGGTTAGGGTGGGCCCTTGGTTGAATTCTTTTGAACAAAAGAACAGCCTGAAAAATCAAGCTGTGGGCACAGATAAGGGAACTTGCACAGCAGAGCTTGCCTAAGACATGCCTACTGCAGCACAGACAAGAAAGGCTACACAGGTGACCTGCCCAGACATTGACGTCATAGAAAATTCCATCCTCTAACACATGTGCAGTTAAGGGGAACAAAGCAATATAGAGTAACTCAAGCTAAGGGCCCACATA	+	chr1_69520969_69521217_EGR1_C2H2_1_center165	EGR1	GCCCACGA	165	CREB1	TGACGTCA	71	83	79	62	51	82	1.61882	3.20429	-1.58547	1.18414	-2.02015	0.434678
chr1_69520969_69521217_EGR1_C2H2_1_center165_to_E2F1_HUMAN.H11MO.0.A	chr1_69520969_69521217	ACGGTTAGGGTGGGCCCTTGGTTGAATTCTTTTGAACAAAAGAACAGCCTGAAAAATCAAGCTGTGGGCACAGATAAGGGAACTTGCACAGCAGAGCTTGCCTAAGACATGCCTACTGCAGCACAGACAAGAAAGGCTACACAGGTGACCTGCCCAGACATGGCGGGAATAGAAAATTCCATCCTCTAACACATGTGCAGTTAAGGGGAACAAAGCAATATAGAGTAACTCAAGCTAAGGGCCCACATA	+	chr1_69520969_69521217_EGR1_C2H2_1_center165	EGR1	GCCCACGA	165	E2F1	GGCGGGAA	146	151	170	50	36	80	0.348172	3.20429	-2.85612	1.18414	-2.02015	-0.835972
chr1_69520969_69521217_EGR1_C2H2_1_center165_to_ETS1_HUMAN.H11MO.0.A	chr1_69520969_69521217	ACGGTTAGGGTGGGCCCTTGGTTGAATTCTTTTGAACAAAAGAACAGCCTGAAAAATCAAGCTGTGGGCACAGATAAGGGAACTTGCACAGCAGAGCTTGCCTAAGACATGCCTACTGCAGCACAGACAAGAAAGGCTACACAGGTGACCTGCCCAGACAACCGGAAGTTAGAAAATTCCATCCTCTAACACATGTGCAGTTAAGGGGAACAAAGCAATATAGAGTAACTCAAGCTAAGGGCCCACATA	+	chr1_69520969_69521217_EGR1_C2H2_1_center165	EGR1	TGCCCACGA	165	ETS	ACCGGAAGT	55	83	59	35	38	67	1.35808	3.20429	-1.84622	1.18414	-2.02015	0.173933
chr1_69520969_69521217_EGR1_C2H2_1_center165_to_FOSL1_MA0477.1	chr1_69520969_69521217	ACGGTTAGGGTGGGCCCTTGGTTGAATTCTTTTGAACAAAAGAACAGCCTGAAAAATCAAGCTGTGGGCACAGATAAGGGAACTTGCACAGCAGAGCTTGCCTAAGACATGCCTACTGCAGCACAGACAAGAAAGGCTACACAGGTGACCTGCCCAGACAGTGACTCATTAGAAAATTCCATCCTCTAACACATGTGCAGTTAAGGGGAACAAAGCAATATAGAGTAACTCAAGCTAAGGGCCCACATA	+	chr1_69520969_69521217_EGR1_C2H2_1_center165	EGR1	TGCCCACGA	165	AP-1	GTGACTCAT	75	71	65	41	28	58	1.11681	3.20429	-2.08748	1.18414	-2.02015	-0.0673335
chr1_69520969_69521217_EGR1_C2H2_1_center165_to_MAFK_MA0496.2	chr1_69520969_69521217	ACGGTTAGGGTGGGCCCTTGGTTGAATTCTTTTGAACAAAAGAACAGCCTGAAAAATCAAGCTGTGGGCACAGATAAGGGAACTTGCACAGCAGAGCTTGCCTAAGACATGCCTACTGCAGCACAGACAAGAAAGGCTACACAGGTGACCTGCCCAGATGCTGAGTCAGCAGAAAATTCCATCCTCTAACACATGTGCAGTTAAGGGGAACAAAGCAATATAGAGTAACTCAAGCTAAGGGCCCACATA	+	chr1_69520969_69521217_EGR1_C2H2_1_center165	EGR1	CATGCCCACGATA	165	MAF	TGCTGAGTCAGCA	50	72	67	20	18	30	0.387583	3.20429	-2.81671	1.18414	-2.02015	-0.79656
chr1_69520969_69521217_EGR1_C2H2_1_center165_to_MECP2_HUMAN.H11MO.0.C	chr1_69520969_69521217	ACGGTTAGGGTGGGCCCTTGGTTGAATTCTTTTGAACAAAAGAACAGCCTGAAAAATCAAGCTGTGGGCACAGATAAGGGAACTTGCACAGCAGAGCTTGCCTAAGACATGCCTACTGCAGCACAGACAAGAAAGGCTACACAGGTGACCTGCCCAGACATCCCGGAGATAGAAAATTCCATCCTCTAACACATGTGCAGTTAAGGGGAACAAAGCAATATAGAGTAACTCAAGCTAAGGGCCCACATA	+	chr1_69520969_69521217_EGR1_C2H2_1_center165	EGR1	GCCCACG	165	MECP2	CCCGGAG	38	47	48	25	18	29	0.986296	3.20429	-2.218	1.18414	-2.02015	-0.197847
chr1_69520969_69521217_EGR1_C2H2_1_center165_to_TP53_MA0106.3	chr1_69520969_69521217	ACGGTTAGGGTGGGCCCTTGGTTGAATTCTTTTGAACAAAAGAACAGCCTGAAAAATCAAGCTGTGGGCACAGATAAGGGAACTTGCACAGCAGAGCTTGCCTAAGACATGCCTACTGCAGCACAGACAAGAAAGGCTACACAGGTGACCTGCCCAGACATGCCCGGGCATGTAAATTCCATCCTCTAACACATGTGCAGTTAAGGGGAACAAAGCAATATAGAGTAACTCAAGCTAAGGGCCCACATA	+	chr1_69520969_69521217_EGR1_C2H2_1_center165	EGR1	ACATGCCCACGATAGA	165	P53	ACATGCCCGGGCATGT	64	62	60	273	218	344	4.05274	3.20429	0.848449	1.18414	-2.02015	2.8686
chr1_69520969_69521217_TP53_MA0106.3_center156_to_E2F1_HUMAN.H11MO.0.A	chr1_69520969_69521217	ACGGTTAGGGTGGGCCCTTGGTTGAATTCTTTTGAACAAAAGAACAGCCTGAAAAATCAAGCTGTGGGCACAGATAAGGGAACTTGCACAGCAGAGCTTGCCTAAGACATGCCTACTGCAGCACAGACAAGAAAGGCTACACAGGTGACCTGGGCGGGAATGCCCACGATAGAAAATTCCATCCTCTAACACATGTGCAGTTAAGGGGAACAAAGCAATATAGAGTAACTCAAGCTAAGGGCCCACATA	+	chr1_69520969_69521217_TP53_MA0106.3_center156	P53	CCCAGACA	156	E2F1	GGCGGGAA	43	51	47	11	13	26	0.343186	3.20429	-2.86111	-0.415963	-3.62026	0.759149
chr1_69520969_69521217_TP53_MA0106.3_center156_to_EGR1_C2H2_1	chr1_69520969_69521217	ACGGTTAGGGTGGGCCCTTGGTTGAATTCTTTTGAACAAAAGAACAGCCTGAAAAATCAAGCTGTGGGCACAGATAAGGGAACTTGCACAGCAGAGCTTGCCTAAGACATGCCTACTGCAGCACAGACAAGAAAGGCTACACAGGTGACCACGCCCACGCAGCCCACGATAGAAAATTCCATCCTCTAACACATGTGCAGTTAAGGGGAACAAAGCAATATAGAGTAACTCAAGCTAAGGGCCCACATA	+	chr1_69520969_69521217_TP53_MA0106.3_center156	P53	TGCCCAGACAT	156	EGR1	ACGCCCACGCA	18	18	11	12	10	18	1.61908	3.20429	-1.58521	-0.415963	-3.62026	2.03504
chr1_69520969_69521217_TP53_MA0106.3_center156_to_ETS1_HUMAN.H11MO.0.A	chr1_69520969_69521217	ACGGTTAGGGTGGGCCCTTGGTTGAATTCTTTTGAACAAAAGAACAGCCTGAAAAATCAAGCTGTGGGCACAGATAAGGGAACTTGCACAGCAGAGCTTGCCTAAGACATGCCTACTGCAGCACAGACAAGAAAGGCTACACAGGTGACCTACCGGAAGTTGCCCACGATAGAAAATTCCATCCTCTAACACATGTGCAGTTAAGGGGAACAAAGCAATATAGAGTAACTCAAGCTAAGGGCCCACATA	+	chr1_69520969_69521217_TP53_MA0106.3_center156	P53	GCCCAGACA	156	ETS	ACCGGAAGT	27	32	33	9	12	30	0.96865	3.20429	-2.23564	-0.415963	-3.62026	1.38461
chr1_69520969_69521217_TP53_MA0106.3_center156_to_FOSL1_MA0477.1	chr1_69520969_69521217	ACGGTTAGGGTGGGCCCTTGGTTGAATTCTTTTGAACAAAAGAACAGCCTGAAAAATCAAGCTGTGGGCACAGATAAGGGAACTTGCACAGCAGAGCTTGCCTAAGACATGCCTACTGCAGCACAGACAAGAAAGGCTACACAGGTGACCTGTGACTCATTGCCCACGATAGAAAATTCCATCCTCTAACACATGTGCAGTTAAGGGGAACAAAGCAATATAGAGTAACTCAAGCTAAGGGCCCACATA	+	chr1_69520969_69521217_TP53_MA0106.3_center156	P53	GCCCAGACA	156	AP-1	GTGACTCAT	54	30	54	40	35	54	1.77413	3.20429	-1.43017	-0.415963	-3.62026	2.19009
chr1_69520969_69521217_TP53_MA0106.3_center156_to_MAFK_MA0496.2	chr1_69520969_69521217	ACGGTTAGGGTGGGCCCTTGGTTGAATTCTTTTGAACAAAAGAACAGCCTGAAAAATCAAGCTGTGGGCACAGATAAGGGAACTTGCACAGCAGAGCTTGCCTAAGACATGCCTACTGCAGCACAGACAAGAAAGGCTACACAGGTGACTGCTGAGTCAGCACCCACGATAGAAAATTCCATCCTCTAACACATGTGCAGTTAAGGGGAACAAAGCAATATAGAGTAACTCAAGCTAAGGGCCCACATA	+	chr1_69520969_69521217_TP53_MA0106.3_center156	P53	CTGCCCAGACATG	156	MAF	TGCTGAGTCAGCA	57	74	56	16	24	26	0.380495	3.20429	-2.8238	-0.415963	-3.62026	0.796458
chr1_7086369_7086617_E2F1_HUMAN.H11MO.0.A_center131_to_CREB1_MA0018.3	chr1_7086369_7086617	TATTGGAAAGCCCCCATGAAGGTCTCTAAAACCTTTTGAAACTAATCTTATAGTCTTAGTTTATATCAGAATTCTGGCAAGGGGAGCCACAGGTAGCAGGAAATCCAGACCTGCTCTCCTGAGTCATTGACGTCATCCCACCGGGGCTGCCACTCCCACAATACATTCTGAATCACACATGAGGCCGTGCCACGGATGACTCCCCCCCTGGACATATAGGAATATCATGATGAAGTCAGAATTCTCACA	-	chr1_7086369_7086617_E2F1_HUMAN.H11MO.0.A_center131	E2F1	TTCCCTTC	131	CREB1	TGACGTCA	113	143	114	131	149	107	2.05705	2.6291	-0.572052	1.30772	-1.32138	0.74933
chr1_7086369_7086617_E2F1_HUMAN.H11MO.0.A_center131_to_EGR1_C2H2_1	chr1_7086369_7086617	TATTGGAAAGCCCCCATGAAGGTCTCTAAAACCTTTTGAAACTAATCTTATAGTCTTAGTTTATATCAGAATTCTGGCAAGGGGAGCCACAGGTAGCAGGAAATCCAGACCTGCTCTCCTGAGTCACGCCCACGCACCCACCGGGGCTGCCACTCCCACAATACATTCTGAATCACACATGAGGCCGTGCCACGGATGACTCCCCCCCTGGACATATAGGAATATCATGATGAAGTCAGAATTCTCACA	-	chr1_7086369_7086617_E2F1_HUMAN.H11MO.0.A_center131	E2F1	ATTTCCCTTCT	131	EGR1	ACGCCCACGCA	184	186	177	77	78	93	0.767846	2.6291	-1.86126	1.30772	-1.32138	-0.539875
chr1_7086369_7086617_E2F1_HUMAN.H11MO.0.A_center131_to_ETS1_HUMAN.H11MO.0.A	chr1_7086369_7086617	TATTGGAAAGCCCCCATGAAGGTCTCTAAAACCTTTTGAAACTAATCTTATAGTCTTAGTTTATATCAGAATTCTGGCAAGGGGAGCCACAGGTAGCAGGAAATCCAGACCTGCTCTCCTGAGTCAACCGGAAGTTCCCACCGGGGCTGCCACTCCCACAATACATTCTGAATCACACATGAGGCCGTGCCACGGATGACTCCCCCCCTGGACATATAGGAATATCATGATGAAGTCAGAATTCTCACA	-	chr1_7086369_7086617_E2F1_HUMAN.H11MO.0.A_center131	E2F1	TTTCCCTTC	131	ETS	ACCGGAAGT	107	106	115	175	158	127	2.47215	2.6291	-0.156957	1.30772	-1.32138	1.16442
chr1_7086369_7086617_E2F1_HUMAN.H11MO.0.A_center131_to_FOSL1_MA0477.1	chr1_7086369_7086617	TATTGGAAAGCCCCCATGAAGGTCTCTAAAACCTTTTGAAACTAATCTTATAGTCTTAGTTTATATCAGAATTCTGGCAAGGGGAGCCACAGGTAGCAGGAAATCCAGACCTGCTCTCCTGAGTCAGTGACTCATTCCCACCGGGGCTGCCACTCCCACAATACATTCTGAATCACACATGAGGCCGTGCCACGGATGACTCCCCCCCTGGACATATAGGAATATCATGATGAAGTCAGAATTCTCACA	-	chr1_7086369_7086617_E2F1_HUMAN.H11MO.0.A_center131	E2F1	TTTCCCTTC	131	AP-1	GTGACTCAT	115	123	122	152	162	116	2.25109	2.6291	-0.378015	1.30772	-1.32138	0.943366
chr1_7086369_7086617_E2F1_HUMAN.H11MO.0.A_center131_to_MAFK_MA0496.2	chr1_7086369_7086617	TATTGGAAAGCCCCCATGAAGGTCTCTAAAACCTTTTGAAACTAATCTTATAGTCTTAGTTTATATCAGAATTCTGGCAAGGGGAGCCACAGGTAGCAGGAAATCCAGACCTGCTCTCCTGAGTTGCTGAGTCAGCACCACCGGGGCTGCCACTCCCACAATACATTCTGAATCACACATGAGGCCGTGCCACGGATGACTCCCCCCCTGGACATATAGGAATATCATGATGAAGTCAGAATTCTCACA	-	chr1_7086369_7086617_E2F1_HUMAN.H11MO.0.A_center131	E2F1	CATTTCCCTTCTC	131	MAF	TGCTGAGTCAGCA	205	190	188	88	84	103	0.824038	2.6291	-1.80506	1.30772	-1.32138	-0.483683
chr1_7086369_7086617_E2F1_HUMAN.H11MO.0.A_center131_to_MECP2_HUMAN.H11MO.0.C	chr1_7086369_7086617	TATTGGAAAGCCCCCATGAAGGTCTCTAAAACCTTTTGAAACTAATCTTATAGTCTTAGTTTATATCAGAATTCTGGCAAGGGGAGCCACAGGTAGCAGGAAATCCAGACCTGCTCTCCTGAGTCATCCCGGAGCTCCCACCGGGGCTGCCACTCCCACAATACATTCTGAATCACACATGAGGCCGTGCCACGGATGACTCCCCCCCTGGACATATAGGAATATCATGATGAAGTCAGAATTCTCACA	-	chr1_7086369_7086617_E2F1_HUMAN.H11MO.0.A_center131	E2F1	TTCCCTT	131	MECP2	CCCGGAG	256	226	266	170	153	176	1.34501	2.6291	-1.2841	1.30772	-1.32138	0.0372851
chr1_7086369_7086617_E2F1_HUMAN.H11MO.0.A_center131_to_TP53_MA0106.3	chr1_7086369_7086617	TATTGGAAAGCCCCCATGAAGGTCTCTAAAACCTTTTGAAACTAATCTTATAGTCTTAGTTTATATCAGAATTCTGGCAAGGGGAGCCACAGGTAGCAGGAAATCCAGACCTGCTCTCCTGAGACATGCCCGGGCATGTACCGGGGCTGCCACTCCCACAATACATTCTGAATCACACATGAGGCCGTGCCACGGATGACTCCCCCCCTGGACATATAGGAATATCATGATGAAGTCAGAATTCTCACA	-	chr1_7086369_7086617_E2F1_HUMAN.H11MO.0.A_center131	E2F1	TCATTTCCCTTCTCCC	131	P53	ACATGCCCGGGCATGT	146	128	145	806	711	1044	4.5062	2.6291	1.8771	1.30772	-1.32138	3.19848
chr1_7086369_7086617_ETS1_HUMAN.H11MO.0.A_center129_to_CREB1_MA0018.3	chr1_7086369_7086617	TATTGGAAAGCCCCCATGAAGGTCTCTAAAACCTTTTGAAACTAATCTTATAGTCTTAGTTTATATCAGAATTCTGGCAAGGGGAGCCACAGGTAGCAGGAAATCCAGACCTGCTCTCCTGAGTCTGACGTCATCTCCCACCGGGGCTGCCACTCCCACAATACATTCTGAATCACACATGAGGCCGTGCCACGGATGACTCCCCCCCTGGACATATAGGAATATCATGATGAAGTCAGAATTCTCACA	-	chr1_7086369_7086617_ETS1_HUMAN.H11MO.0.A_center129	ETS	ATTTCCCT	129	CREB1	TGACGTCA	213	238	240	176	191	147	1.55987	2.6291	-1.06923	0.490959	-2.13814	1.06892
chr1_7086369_7086617_ETS1_HUMAN.H11MO.0.A_center129_to_E2F1_HUMAN.H11MO.0.A	chr1_7086369_7086617	TATTGGAAAGCCCCCATGAAGGTCTCTAAAACCTTTTGAAACTAATCTTATAGTCTTAGTTTATATCAGAATTCTGGCAAGGGGAGCCACAGGTAGCAGGAAATCCAGACCTGCTCTCCTGAGTCGGCGGGAATCTCCCACCGGGGCTGCCACTCCCACAATACATTCTGAATCACACATGAGGCCGTGCCACGGATGACTCCCCCCCTGGACATATAGGAATATCATGATGAAGTCAGAATTCTCACA	-	chr1_7086369_7086617_ETS1_HUMAN.H11MO.0.A_center129	ETS	ATTTCCCT	129	E2F1	GGCGGGAA	107	125	107	41	35	55	0.500708	2.6291	-2.12839	0.490959	-2.13814	0.0097489
chr1_7086369_7086617_ETS1_HUMAN.H11MO.0.A_center129_to_EGR1_C2H2_1	chr1_7086369_7086617	TATTGGAAAGCCCCCATGAAGGTCTCTAAAACCTTTTGAAACTAATCTTATAGTCTTAGTTTATATCAGAATTCTGGCAAGGGGAGCCACAGGTAGCAGGAAATCCAGACCTGCTCTCCTGAGACGCCCACGCACTCCCACCGGGGCTGCCACTCCCACAATACATTCTGAATCACACATGAGGCCGTGCCACGGATGACTCCCCCCCTGGACATATAGGAATATCATGATGAAGTCAGAATTCTCACA	-	chr1_7086369_7086617_ETS1_HUMAN.H11MO.0.A_center129	ETS	TCATTTCCCTT	129	EGR1	ACGCCCACGCA	128	136	133	63	58	82	0.91913	2.6291	-1.70997	0.490959	-2.13814	0.428171
chr1_7086369_7086617_ETS1_HUMAN.H11MO.0.A_center129_to_FOSL1_MA0477.1	chr1_7086369_7086617	TATTGGAAAGCCCCCATGAAGGTCTCTAAAACCTTTTGAAACTAATCTTATAGTCTTAGTTTATATCAGAATTCTGGCAAGGGGAGCCACAGGTAGCAGGAAATCCAGACCTGCTCTCCTGAGTGTGACTCATTCTCCCACCGGGGCTGCCACTCCCACAATACATTCTGAATCACACATGAGGCCGTGCCACGGATGACTCCCCCCCTGGACATATAGGAATATCATGATGAAGTCAGAATTCTCACA	-	chr1_7086369_7086617_ETS1_HUMAN.H11MO.0.A_center129	ETS	CATTTCCCT	129	AP-1	GTGACTCAT	301	303	333	386	407	298	2.2192	2.6291	-0.409902	0.490959	-2.13814	1.72824
chr1_7086369_7086617_ETS1_HUMAN.H11MO.0.A_center129_to_MAFK_MA0496.2	chr1_7086369_7086617	TATTGGAAAGCCCCCATGAAGGTCTCTAAAACCTTTTGAAACTAATCTTATAGTCTTAGTTTATATCAGAATTCTGGCAAGGGGAGCCACAGGTAGCAGGAAATCCAGACCTGCTCTCCTGATGCTGAGTCAGCATCCCACCGGGGCTGCCACTCCCACAATACATTCTGAATCACACATGAGGCCGTGCCACGGATGACTCCCCCCCTGGACATATAGGAATATCATGATGAAGTCAGAATTCTCACA	-	chr1_7086369_7086617_ETS1_HUMAN.H11MO.0.A_center129	ETS	GTCATTTCCCTTC	129	MAF	TGCTGAGTCAGCA	160	181	148	90	65	78	0.85662	2.6291	-1.77248	0.490959	-2.13814	0.365661
chr1_7086369_7086617_ETS1_HUMAN.H11MO.0.A_center129_to_MECP2_HUMAN.H11MO.0.C	chr1_7086369_7086617	TATTGGAAAGCCCCCATGAAGGTCTCTAAAACCTTTTGAAACTAATCTTATAGTCTTAGTTTATATCAGAATTCTGGCAAGGGGAGCCACAGGTAGCAGGAAATCCAGACCTGCTCTCCTGAGTCCCCGGAGTTCTCCCACCGGGGCTGCCACTCCCACAATACATTCTGAATCACACATGAGGCCGTGCCACGGATGACTCCCCCCCTGGACATATAGGAATATCATGATGAAGTCAGAATTCTCACA	-	chr1_7086369_7086617_ETS1_HUMAN.H11MO.0.A_center129	ETS	ATTTCCC	129	MECP2	CCCGGAG	90	97	98	25	22	38	0.112554	2.6291	-2.51655	0.490959	-2.13814	-0.378406
chr1_7086369_7086617_ETS1_HUMAN.H11MO.0.A_center129_to_TP53_MA0106.3	chr1_7086369_7086617	TATTGGAAAGCCCCCATGAAGGTCTCTAAAACCTTTTGAAACTAATCTTATAGTCTTAGTTTATATCAGAATTCTGGCAAGGGGAGCCACAGGTAGCAGGAAATCCAGACCTGCTCTCCTGACATGCCCGGGCATGTCCACCGGGGCTGCCACTCCCACAATACATTCTGAATCACACATGAGGCCGTGCCACGGATGACTCCCCCCCTGGACATATAGGAATATCATGATGAAGTCAGAATTCTCACA	-	chr1_7086369_7086617_ETS1_HUMAN.H11MO.0.A_center129	ETS	AGTCATTTCCCTTCTC	129	P53	ACATGCCCGGGCATGT	142	158	159	963	813	1215	4.60119	2.6291	1.97209	0.490959	-2.13814	4.11023
chr1_8272111_8272359_ETS1_HUMAN.H11MO.0.A_center135_to_CREB1_MA0018.3	chr1_8272111_8272359	GGCAGGAGAATCGTGCCCTAGCACACGGAGAGGGTGGGGTTCAAACGTGCACACTTGCTTTTCTTTCCTAAAGCCATGTATCGAGACTATTTGTTTAGTCCTGTTCTGAAAGATGATGCAACATGACTCGATGACGTCAGGGCAGTTGCCTTGCTGCCGCGAGGTAAGGAATGTCACGTCGCTCAAATGTGCTTCGCATTCCCAGAAATATGCCGCAGCTGAAAGGGAGGAGATGACTCAATGTTCCCC	-	chr1_8272111_8272359_ETS1_HUMAN.H11MO.0.A_center135	ETS	AAGGAAGT	135	CREB1	TGACGTCA	632	719	715	1696	1715	1485	3.22588	3.22782	-0.00194655	2.09523	-1.13259	1.13064
chr1_8272111_8272359_ETS1_HUMAN.H11MO.0.A_center135_to_EGR1_C2H2_1	chr1_8272111_8272359	GGCAGGAGAATCGTGCCCTAGCACACGGAGAGGGTGGGGTTCAAACGTGCACACTTGCTTTTCTTTCCTAAAGCCATGTATCGAGACTATTTGTTTAGTCCTGTTCTGAAAGATGATGCAACATGACTCACGCCCACGCAGGCAGTTGCCTTGCTGCCGCGAGGTAAGGAATGTCACGTCGCTCAAATGTGCTTCGCATTCCCAGAAATATGCCGCAGCTGAAAGGGAGGAGATGACTCAATGTTCCCC	-	chr1_8272111_8272359_ETS1_HUMAN.H11MO.0.A_center135	ETS	GAAAGGAAGTG	135	EGR1	ACGCCCACGCA	170	178	169	517	537	508	3.55697	3.22782	0.329147	2.09523	-1.13259	1.46174
chr1_8272111_8272359_ETS1_HUMAN.H11MO.0.A_center135_to_FOSL1_MA0477.1	chr1_8272111_8272359	GGCAGGAGAATCGTGCCCTAGCACACGGAGAGGGTGGGGTTCAAACGTGCACACTTGCTTTTCTTTCCTAAAGCCATGTATCGAGACTATTTGTTTAGTCCTGTTCTGAAAGATGATGCAACATGACTCGGTGACTCATGGGCAGTTGCCTTGCTGCCGCGAGGTAAGGAATGTCACGTCGCTCAAATGTGCTTCGCATTCCCAGAAATATGCCGCAGCTGAAAGGGAGGAGATGACTCAATGTTCCCC	-	chr1_8272111_8272359_ETS1_HUMAN.H11MO.0.A_center135	ETS	AAAGGAAGT	135	AP-1	GTGACTCAT	741	844	765	2606	2466	2261	3.61593	3.22782	0.388105	2.09523	-1.13259	1.5207
chr1_8272111_8272359_ETS1_HUMAN.H11MO.0.A_center135_to_MAFK_MA0496.2	chr1_8272111_8272359	GGCAGGAGAATCGTGCCCTAGCACACGGAGAGGGTGGGGTTCAAACGTGCACACTTGCTTTTCTTTCCTAAAGCCATGTATCGAGACTATTTGTTTAGTCCTGTTCTGAAAGATGATGCAACATGACTTGCTGAGTCAGCAGCAGTTGCCTTGCTGCCGCGAGGTAAGGAATGTCACGTCGCTCAAATGTGCTTCGCATTCCCAGAAATATGCCGCAGCTGAAAGGGAGGAGATGACTCAATGTTCCCC	-	chr1_8272111_8272359_ETS1_HUMAN.H11MO.0.A_center135	ETS	CGAAAGGAAGTGG	135	MAF	TGCTGAGTCAGCA	335	381	338	720	663	727	2.94604	3.22782	-0.281785	2.09523	-1.13259	0.850806
chr1_8272111_8272359_ETS1_HUMAN.H11MO.0.A_center135_to_MECP2_HUMAN.H11MO.0.C	chr1_8272111_8272359	GGCAGGAGAATCGTGCCCTAGCACACGGAGAGGGTGGGGTTCAAACGTGCACACTTGCTTTTCTTTCCTAAAGCCATGTATCGAGACTATTTGTTTAGTCCTGTTCTGAAAGATGATGCAACATGACTCGACCCGGAGTGGGCAGTTGCCTTGCTGCCGCGAGGTAAGGAATGTCACGTCGCTCAAATGTGCTTCGCATTCCCAGAAATATGCCGCAGCTGAAAGGGAGGAGATGACTCAATGTTCCCC	-	chr1_8272111_8272359_ETS1_HUMAN.H11MO.0.A_center135	ETS	AAGGAAG	135	MECP2	CCCGGAG	209	244	224	271	239	319	2.20341	3.22782	-1.02441	2.09523	-1.13259	0.108183
chr1_8272111_8272359_ETS1_HUMAN.H11MO.0.A_center135_to_TP53_MA0106.3	chr1_8272111_8272359	GGCAGGAGAATCGTGCCCTAGCACACGGAGAGGGTGGGGTTCAAACGTGCACACTTGCTTTTCTTTCCTAAAGCCATGTATCGAGACTATTTGTTTAGTCCTGTTCTGAAAGATGATGCAACATGACACATGCCCGGGCATGTAGTTGCCTTGCTGCCGCGAGGTAAGGAATGTCACGTCGCTCAAATGTGCTTCGCATTCCCAGAAATATGCCGCAGCTGAAAGGGAGGAGATGACTCAATGTTCCCC	-	chr1_8272111_8272359_ETS1_HUMAN.H11MO.0.A_center135	ETS	TCGAAAGGAAGTGGGC	135	P53	ACATGCCCGGGCATGT	231	251	225	1561	1323	2114	4.70506	3.22782	1.47724	2.09523	-1.13259	2.60983
chr1_86073085_86073333_EGR1_C2H2_1_center104_to_CREB1_MA0018.3	chr1_86073085_86073333	TGCCCTCACGTTCTTCCTGGTGGGGGGCCTCCCAAGGACATTCTGCCTCAGGTTCTTATTGTCTGAGGTCACTGAGCCTCCTGAAAGTATTTCAGGAATGTGACGTCATGACTCACTCTCTTCCTTGAGTTCACAGTCTGAAGTTCATAAAACCTCTTCCCCCTTTAGTCATTCTTATTCAAATACCGGCCCACAAGTTTCACAGATGGAGCTGGCAGGAGGAATCTTGGGAAGCATTTTTTTGCTCAG	+	chr1_86073085_86073333_EGR1_C2H2_1_center104	EGR1	TGGAGGCC	104	CREB1	TGACGTCA	403	417	446	592	574	418	2.32793	2.62233	-0.294402	1.18902	-1.43331	1.13891
chr1_86073085_86073333_EGR1_C2H2_1_center104_to_E2F1_HUMAN.H11MO.0.A	chr1_86073085_86073333	TGCCCTCACGTTCTTCCTGGTGGGGGGCCTCCCAAGGACATTCTGCCTCAGGTTCTTATTGTCTGAGGTCACTGAGCCTCCTGAAAGTATTTCAGGAATGGGCGGGAATGACTCACTCTCTTCCTTGAGTTCACAGTCTGAAGTTCATAAAACCTCTTCCCCCTTTAGTCATTCTTATTCAAATACCGGCCCACAAGTTTCACAGATGGAGCTGGCAGGAGGAATCTTGGGAAGCATTTTTTTGCTCAG	+	chr1_86073085_86073333_EGR1_C2H2_1_center104	EGR1	TGGAGGCC	104	E2F1	GGCGGGAA	330	365	375	652	576	681	2.77011	2.62233	0.147779	1.18902	-1.43331	1.58109
chr1_86073085_86073333_EGR1_C2H2_1_center104_to_ETS1_HUMAN.H11MO.0.A	chr1_86073085_86073333	TGCCCTCACGTTCTTCCTGGTGGGGGGCCTCCCAAGGACATTCTGCCTCAGGTTCTTATTGTCTGAGGTCACTGAGCCTCCTGAAAGTATTTCAGGAATACCGGAAGTTGACTCACTCTCTTCCTTGAGTTCACAGTCTGAAGTTCATAAAACCTCTTCCCCCTTTAGTCATTCTTATTCAAATACCGGCCCACAAGTTTCACAGATGGAGCTGGCAGGAGGAATCTTGGGAAGCATTTTTTTGCTCAG	+	chr1_86073085_86073333_EGR1_C2H2_1_center104	EGR1	GTGGAGGCC	104	ETS	ACCGGAAGT	134	120	117	324	318	245	3.24761	2.62233	0.625274	1.18902	-1.43331	2.05858
chr1_86073085_86073333_EGR1_C2H2_1_center104_to_FOSL1_MA0477.1	chr1_86073085_86073333	TGCCCTCACGTTCTTCCTGGTGGGGGGCCTCCCAAGGACATTCTGCCTCAGGTTCTTATTGTCTGAGGTCACTGAGCCTCCTGAAAGTATTTCAGGAATGTGACTCATTGACTCACTCTCTTCCTTGAGTTCACAGTCTGAAGTTCATAAAACCTCTTCCCCCTTTAGTCATTCTTATTCAAATACCGGCCCACAAGTTTCACAGATGGAGCTGGCAGGAGGAATCTTGGGAAGCATTTTTTTGCTCAG	+	chr1_86073085_86073333_EGR1_C2H2_1_center104	EGR1	GTGGAGGCC	104	AP-1	GTGACTCAT	158	159	146	239	237	243	2.58076	2.62233	-0.0415737	1.18902	-1.43331	1.39173
chr1_86073085_86073333_EGR1_C2H2_1_center104_to_MAFK_MA0496.2	chr1_86073085_86073333	TGCCCTCACGTTCTTCCTGGTGGGGGGCCTCCCAAGGACATTCTGCCTCAGGTTCTTATTGTCTGAGGTCACTGAGCCTCCTGAAAGTATTTCAGGATGCTGAGTCAGCAACTCACTCTCTTCCTTGAGTTCACAGTCTGAAGTTCATAAAACCTCTTCCCCCTTTAGTCATTCTTATTCAAATACCGGCCCACAAGTTTCACAGATGGAGCTGGCAGGAGGAATCTTGGGAAGCATTTTTTTGCTCAG	+	chr1_86073085_86073333_EGR1_C2H2_1_center104	EGR1	ATGTGGAGGCCTG	104	MAF	TGCTGAGTCAGCA	699	725	699	262	222	308	0.482484	2.62233	-2.13985	1.18902	-1.43331	-0.70654
chr1_86073085_86073333_EGR1_C2H2_1_center104_to_MECP2_HUMAN.H11MO.0.C	chr1_86073085_86073333	TGCCCTCACGTTCTTCCTGGTGGGGGGCCTCCCAAGGACATTCTGCCTCAGGTTCTTATTGTCTGAGGTCACTGAGCCTCCTGAAAGTATTTCAGGAATGCCCGGAGCTGACTCACTCTCTTCCTTGAGTTCACAGTCTGAAGTTCATAAAACCTCTTCCCCCTTTAGTCATTCTTATTCAAATACCGGCCCACAAGTTTCACAGATGGAGCTGGCAGGAGGAATCTTGGGAAGCATTTTTTTGCTCAG	+	chr1_86073085_86073333_EGR1_C2H2_1_center104	EGR1	TGGAGGC	104	MECP2	CCCGGAG	266	291	278	1011	830	828	3.64223	2.62233	1.01989	1.18902	-1.43331	2.4532
chr1_86073085_86073333_EGR1_C2H2_1_center104_to_TP53_MA0106.3	chr1_86073085_86073333	TGCCCTCACGTTCTTCCTGGTGGGGGGCCTCCCAAGGACATTCTGCCTCAGGTTCTTATTGTCTGAGGTCACTGAGCCTCCTGAAAGTATTTCAGGACATGCCCGGGCATGTTCACTCTCTTCCTTGAGTTCACAGTCTGAAGTTCATAAAACCTCTTCCCCCTTTAGTCATTCTTATTCAAATACCGGCCCACAAGTTTCACAGATGGAGCTGGCAGGAGGAATCTTGGGAAGCATTTTTTTGCTCAG	+	chr1_86073085_86073333_EGR1_C2H2_1_center104	EGR1	AATGTGGAGGCCTGAC	104	P53	ACATGCCCGGGCATGT	310	323	369	1080	808	1286	3.55743	2.62233	0.935097	1.18902	-1.43331	2.3684
chr1_8933718_8933966_E2F1_HUMAN.H11MO.0.A_center191_to_CREB1_MA0018.3	chr1_8933718_8933966	CTTTGTAGCTCTGTGTTACCTCCAGCACATGGCGCGATGGACAGAGTGGGTGAGGTTGGCAAAGGAGCTTCAGGCAGAATCACTCAGCGGTGCTAAACTCACAGAGAACTGCCAGTCGGAGCTGAGTCACCATCTGTGAGTCACAGGCCTAGCAGTGGAACCCCAGCCCTTCCCTTCCCCTTGCACCTGACGTCACCCTCAGGAAGAAAGGATCCTTGAGGCCTGACTTCGTTGGGCAAAAGAATGCCT	-	chr1_8933718_8933966_E2F1_HUMAN.H11MO.0.A_center191	E2F1	TCCCCTCC	191	CREB1	TGACGTCA	181	185	181	724	644	572	3.80477	3.33605	0.468724	1.95311	-1.38294	1.85166
chr1_8933718_8933966_E2F1_HUMAN.H11MO.0.A_center191_to_EGR1_C2H2_1	chr1_8933718_8933966	CTTTGTAGCTCTGTGTTACCTCCAGCACATGGCGCGATGGACAGAGTGGGTGAGGTTGGCAAAGGAGCTTCAGGCAGAATCACTCAGCGGTGCTAAACTCACAGAGAACTGCCAGTCGGAGCTGAGTCACCATCTGTGAGTCACAGGCCTAGCAGTGGAACCCCAGCCCTTCCCTTCCCCTTGCAACGCCCACGCACCTCAGGAAGAAAGGATCCTTGAGGCCTGACTTCGTTGGGCAAAAGAATGCCT	-	chr1_8933718_8933966_E2F1_HUMAN.H11MO.0.A_center191	E2F1	CCTCCCCTCCC	191	EGR1	ACGCCCACGCA	476	496	458	1571	1321	1651	3.59483	3.33605	0.258782	1.95311	-1.38294	1.64172
chr1_8933718_8933966_E2F1_HUMAN.H11MO.0.A_center191_to_ETS1_HUMAN.H11MO.0.A	chr1_8933718_8933966	CTTTGTAGCTCTGTGTTACCTCCAGCACATGGCGCGATGGACAGAGTGGGTGAGGTTGGCAAAGGAGCTTCAGGCAGAATCACTCAGCGGTGCTAAACTCACAGAGAACTGCCAGTCGGAGCTGAGTCACCATCTGTGAGTCACAGGCCTAGCAGTGGAACCCCAGCCCTTCCCTTCCCCTTGCACACCGGAAGTCCCTCAGGAAGAAAGGATCCTTGAGGCCTGACTTCGTTGGGCAAAAGAATGCCT	-	chr1_8933718_8933966_E2F1_HUMAN.H11MO.0.A_center191	E2F1	CTCCCCTCC	191	ETS	ACCGGAAGT	200	165	200	565	487	602	3.47444	3.33605	0.138387	1.95311	-1.38294	1.52132
chr1_8933718_8933966_E2F1_HUMAN.H11MO.0.A_center191_to_FOSL1_MA0477.1	chr1_8933718_8933966	CTTTGTAGCTCTGTGTTACCTCCAGCACATGGCGCGATGGACAGAGTGGGTGAGGTTGGCAAAGGAGCTTCAGGCAGAATCACTCAGCGGTGCTAAACTCACAGAGAACTGCCAGTCGGAGCTGAGTCACCATCTGTGAGTCACAGGCCTAGCAGTGGAACCCCAGCCCTTCCCTTCCCCTTGCACGTGACTCATCCCTCAGGAAGAAAGGATCCTTGAGGCCTGACTTCGTTGGGCAAAAGAATGCCT	-	chr1_8933718_8933966_E2F1_HUMAN.H11MO.0.A_center191	E2F1	CTCCCCTCC	191	AP-1	GTGACTCAT	328	381	350	1330	1161	1221	3.7653	3.33605	0.42925	1.95311	-1.38294	1.81219
chr1_8933718_8933966_E2F1_HUMAN.H11MO.0.A_center191_to_MAFK_MA0496.2	chr1_8933718_8933966	CTTTGTAGCTCTGTGTTACCTCCAGCACATGGCGCGATGGACAGAGTGGGTGAGGTTGGCAAAGGAGCTTCAGGCAGAATCACTCAGCGGTGCTAAACTCACAGAGAACTGCCAGTCGGAGCTGAGTCACCATCTGTGAGTCACAGGCCTAGCAGTGGAACCCCAGCCCTTCCCTTCCCCTTGCTGCTGAGTCAGCACTCAGGAAGAAAGGATCCTTGAGGCCTGACTTCGTTGGGCAAAAGAATGCCT	-	chr1_8933718_8933966_E2F1_HUMAN.H11MO.0.A_center191	E2F1	ACCTCCCCTCCCC	191	MAF	TGCTGAGTCAGCA	623	628	557	1205	1046	1070	2.83443	3.33605	-0.501623	1.95311	-1.38294	0.881314
chr1_8933718_8933966_E2F1_HUMAN.H11MO.0.A_center191_to_MECP2_HUMAN.H11MO.0.C	chr1_8933718_8933966	CTTTGTAGCTCTGTGTTACCTCCAGCACATGGCGCGATGGACAGAGTGGGTGAGGTTGGCAAAGGAGCTTCAGGCAGAATCACTCAGCGGTGCTAAACTCACAGAGAACTGCCAGTCGGAGCTGAGTCACCATCTGTGAGTCACAGGCCTAGCAGTGGAACCCCAGCCCTTCCCTTCCCCTTGCACCCCCGGAGCCCCTCAGGAAGAAAGGATCCTTGAGGCCTGACTTCGTTGGGCAAAAGAATGCCT	-	chr1_8933718_8933966_E2F1_HUMAN.H11MO.0.A_center191	E2F1	TCCCCTC	191	MECP2	CCCGGAG	315	314	323	386	274	480	2.13741	3.33605	-1.19864	1.95311	-1.38294	0.184294
chr1_8933718_8933966_E2F1_HUMAN.H11MO.0.A_center191_to_TP53_MA0106.3	chr1_8933718_8933966	CTTTGTAGCTCTGTGTTACCTCCAGCACATGGCGCGATGGACAGAGTGGGTGAGGTTGGCAAAGGAGCTTCAGGCAGAATCACTCAGCGGTGCTAAACTCACAGAGAACTGCCAGTCGGAGCTGAGTCACCATCTGTGAGTCACAGGCCTAGCAGTGGAACCCCAGCCCTTCCCTTCCCCTTGACATGCCCGGGCATGTCAGGAAGAAAGGATCCTTGAGGCCTGACTTCGTTGGGCAAAAGAATGCCT	-	chr1_8933718_8933966_E2F1_HUMAN.H11MO.0.A_center191	E2F1	CACCTCCCCTCCCCCT	191	P53	ACATGCCCGGGCATGT	179	188	182	1400	1077	1718	4.8241	3.33605	1.48805	1.95311	-1.38294	2.87099
chr1_8933718_8933966_EGR1_C2H2_1_center196_to_CREB1_MA0018.3	chr1_8933718_8933966	CTTTGTAGCTCTGTGTTACCTCCAGCACATGGCGCGATGGACAGAGTGGGTGAGGTTGGCAAAGGAGCTTCAGGCAGAATCACTCAGCGGTGCTAAACTCACAGAGAACTGCCAGTCGGAGCTGAGTCACCATCTGTGAGTCACAGGCCTAGCAGTGGAACCCCAGCCCTTCCCTTCCCCTTGCACCTCCCCTGACGTCAAGGAAGAAAGGATCCTTGAGGCCTGACTTCGTTGGGCAAAAGAATGCCT	-	chr1_8933718_8933966_EGR1_C2H2_1_center196	EGR1	TCCCCCTC	196	CREB1	TGACGTCA	161	186	203	400	358	435	3.04663	3.33605	-0.289421	2.30608	-1.02997	0.740546
chr1_8933718_8933966_EGR1_C2H2_1_center196_to_E2F1_HUMAN.H11MO.0.A	chr1_8933718_8933966	CTTTGTAGCTCTGTGTTACCTCCAGCACATGGCGCGATGGACAGAGTGGGTGAGGTTGGCAAAGGAGCTTCAGGCAGAATCACTCAGCGGTGCTAAACTCACAGAGAACTGCCAGTCGGAGCTGAGTCACCATCTGTGAGTCACAGGCCTAGCAGTGGAACCCCAGCCCTTCCCTTCCCCTTGCACCTCCCCGGCGGGAAAGGAAGAAAGGATCCTTGAGGCCTGACTTCGTTGGGCAAAAGAATGCCT	-	chr1_8933718_8933966_EGR1_C2H2_1_center196	EGR1	TCCCCCTC	196	E2F1	GGCGGGAA	169	199	176	230	182	281	2.24127	3.33605	-1.09478	2.30608	-1.02997	-0.064814
chr1_8933718_8933966_EGR1_C2H2_1_center196_to_ETS1_HUMAN.H11MO.0.A	chr1_8933718_8933966	CTTTGTAGCTCTGTGTTACCTCCAGCACATGGCGCGATGGACAGAGTGGGTGAGGTTGGCAAAGGAGCTTCAGGCAGAATCACTCAGCGGTGCTAAACTCACAGAGAACTGCCAGTCGGAGCTGAGTCACCATCTGTGAGTCACAGGCCTAGCAGTGGAACCCCAGCCCTTCCCTTCCCCTTGCACCTCCCACCGGAAGTAGGAAGAAAGGATCCTTGAGGCCTGACTTCGTTGGGCAAAAGAATGCCT	-	chr1_8933718_8933966_EGR1_C2H2_1_center196	EGR1	CTCCCCCTC	196	ETS	ACCGGAAGT	145	166	151	406	365	387	3.27547	3.33605	-0.0605783	2.30608	-1.02997	0.969389
chr1_8933718_8933966_EGR1_C2H2_1_center196_to_FOSL1_MA0477.1	chr1_8933718_8933966	CTTTGTAGCTCTGTGTTACCTCCAGCACATGGCGCGATGGACAGAGTGGGTGAGGTTGGCAAAGGAGCTTCAGGCAGAATCACTCAGCGGTGCTAAACTCACAGAGAACTGCCAGTCGGAGCTGAGTCACCATCTGTGAGTCACAGGCCTAGCAGTGGAACCCCAGCCCTTCCCTTCCCCTTGCACCTCCCGTGACTCATAGGAAGAAAGGATCCTTGAGGCCTGACTTCGTTGGGCAAAAGAATGCCT	-	chr1_8933718_8933966_EGR1_C2H2_1_center196	EGR1	CTCCCCCTC	196	AP-1	GTGACTCAT	61	86	77	328	274	305	3.96526	3.33605	0.629206	2.30608	-1.02997	1.65917
chr1_8933718_8933966_EGR1_C2H2_1_center196_to_MAFK_MA0496.2	chr1_8933718_8933966	CTTTGTAGCTCTGTGTTACCTCCAGCACATGGCGCGATGGACAGAGTGGGTGAGGTTGGCAAAGGAGCTTCAGGCAGAATCACTCAGCGGTGCTAAACTCACAGAGAACTGCCAGTCGGAGCTGAGTCACCATCTGTGAGTCACAGGCCTAGCAGTGGAACCCCAGCCCTTCCCTTCCCCTTGCACCTCTGCTGAGTCAGCAGAAGAAAGGATCCTTGAGGCCTGACTTCGTTGGGCAAAAGAATGCCT	-	chr1_8933718_8933966_EGR1_C2H2_1_center196	EGR1	CCCTCCCCCTCAG	196	MAF	TGCTGAGTCAGCA	181	179	196	257	239	272	2.39957	3.33605	-0.936483	2.30608	-1.02997	0.0934837
chr1_8933718_8933966_EGR1_C2H2_1_center196_to_TP53_MA0106.3	chr1_8933718_8933966	CTTTGTAGCTCTGTGTTACCTCCAGCACATGGCGCGATGGACAGAGTGGGTGAGGTTGGCAAAGGAGCTTCAGGCAGAATCACTCAGCGGTGCTAAACTCACAGAGAACTGCCAGTCGGAGCTGAGTCACCATCTGTGAGTCACAGGCCTAGCAGTGGAACCCCAGCCCTTCCCTTCCCCTTGCACCTACATGCCCGGGCATGTAGAAAGGATCCTTGAGGCCTGACTTCGTTGGGCAAAAGAATGCCT	-	chr1_8933718_8933966_EGR1_C2H2_1_center196	EGR1	CCCCTCCCCCTCAGGA	196	P53	ACATGCCCGGGCATGT	250	269	255	1783	1476	2385	4.74971	3.33605	1.41366	2.30608	-1.02997	2.44362
chr1_8933718_8933966_MAFK_MA0496.2_center126_to_CREB1_MA0018.3	chr1_8933718_8933966	CTTTGTAGCTCTGTGTTACCTCCAGCACATGGCGCGATGGACAGAGTGGGTGAGGTTGGCAAAGGAGCTTCAGGCAGAATCACTCAGCGGTGCTAAACTCACAGAGAACTGCCAGTCGGAGCTGACGTCACATCTGTGAGTCACAGGCCTAGCAGTGGAACCCCAGCCCTTCCCTTCCCCTTGCACCTCCCCTCCCCCTCAGGAAGAAAGGATCCTTGAGGCCTGACTTCGTTGGGCAAAAGAATGCCT	-	chr1_8933718_8933966_MAFK_MA0496.2_center126	MAF	TGAGTCAC	126	CREB1	TGACGTCA	125	156	163	200	220	265	2.54422	3.33605	-0.79183	1.65544	-1.68061	0.888781
chr1_8933718_8933966_MAFK_MA0496.2_center126_to_E2F1_HUMAN.H11MO.0.A	chr1_8933718_8933966	CTTTGTAGCTCTGTGTTACCTCCAGCACATGGCGCGATGGACAGAGTGGGTGAGGTTGGCAAAGGAGCTTCAGGCAGAATCACTCAGCGGTGCTAAACTCACAGAGAACTGCCAGTCGGAGCGGCGGGAACATCTGTGAGTCACAGGCCTAGCAGTGGAACCCCAGCCCTTCCCTTCCCCTTGCACCTCCCCTCCCCCTCAGGAAGAAAGGATCCTTGAGGCCTGACTTCGTTGGGCAAAAGAATGCCT	-	chr1_8933718_8933966_MAFK_MA0496.2_center126	MAF	TGAGTCAC	126	E2F1	GGCGGGAA	94	116	133	80	77	145	1.66494	3.33605	-1.67111	1.65544	-1.68061	0.00949705
chr1_8933718_8933966_MAFK_MA0496.2_center126_to_EGR1_C2H2_1	chr1_8933718_8933966	CTTTGTAGCTCTGTGTTACCTCCAGCACATGGCGCGATGGACAGAGTGGGTGAGGTTGGCAAAGGAGCTTCAGGCAGAATCACTCAGCGGTGCTAAACTCACAGAGAACTGCCAGTCGGAACGCCCACGCAATCTGTGAGTCACAGGCCTAGCAGTGGAACCCCAGCCCTTCCCTTCCCCTTGCACCTCCCCTCCCCCTCAGGAAGAAAGGATCCTTGAGGCCTGACTTCGTTGGGCAAAAGAATGCCT	-	chr1_8933718_8933966_MAFK_MA0496.2_center126	MAF	GCTGAGTCACC	126	EGR1	ACGCCCACGCA	271	283	326	412	353	450	2.38806	3.33605	-0.947986	1.65544	-1.68061	0.732625
chr1_8933718_8933966_MAFK_MA0496.2_center126_to_ETS1_HUMAN.H11MO.0.A	chr1_8933718_8933966	CTTTGTAGCTCTGTGTTACCTCCAGCACATGGCGCGATGGACAGAGTGGGTGAGGTTGGCAAAGGAGCTTCAGGCAGAATCACTCAGCGGTGCTAAACTCACAGAGAACTGCCAGTCGGAGACCGGAAGTCATCTGTGAGTCACAGGCCTAGCAGTGGAACCCCAGCCCTTCCCTTCCCCTTGCACCTCCCCTCCCCCTCAGGAAGAAAGGATCCTTGAGGCCTGACTTCGTTGGGCAAAAGAATGCCT	-	chr1_8933718_8933966_MAFK_MA0496.2_center126	MAF	CTGAGTCAC	126	ETS	ACCGGAAGT	164	185	174	377	327	399	3.0048	3.33605	-0.331248	1.65544	-1.68061	1.34936
chr1_8933718_8933966_MAFK_MA0496.2_center126_to_MECP2_HUMAN.H11MO.0.C	chr1_8933718_8933966	CTTTGTAGCTCTGTGTTACCTCCAGCACATGGCGCGATGGACAGAGTGGGTGAGGTTGGCAAAGGAGCTTCAGGCAGAATCACTCAGCGGTGCTAAACTCACAGAGAACTGCCAGTCGGAGCCCCGGAGCCATCTGTGAGTCACAGGCCTAGCAGTGGAACCCCAGCCCTTCCCTTCCCCTTGCACCTCCCCTCCCCCTCAGGAAGAAAGGATCCTTGAGGCCTGACTTCGTTGGGCAAAAGAATGCCT	-	chr1_8933718_8933966_MAFK_MA0496.2_center126	MAF	TGAGTCA	126	MECP2	CCCGGAG	329	353	338	274	221	443	1.72398	3.33605	-1.61207	1.65544	-1.68061	0.0685433
chr1_8933718_8933966_MAFK_MA0496.2_center126_to_TP53_MA0106.3	chr1_8933718_8933966	CTTTGTAGCTCTGTGTTACCTCCAGCACATGGCGCGATGGACAGAGTGGGTGAGGTTGGCAAAGGAGCTTCAGGCAGAATCACTCAGCGGTGCTAAACTCACAGAGAACTGCCAGTCGACATGCCCGGGCATGTTGTGAGTCACAGGCCTAGCAGTGGAACCCCAGCCCTTCCCTTCCCCTTGCACCTCCCCTCCCCCTCAGGAAGAAAGGATCCTTGAGGCCTGACTTCGTTGGGCAAAAGAATGCCT	-	chr1_8933718_8933966_MAFK_MA0496.2_center126	MAF	GAGCTGAGTCACCATC	126	P53	ACATGCCCGGGCATGT	197	240	241	1585	1177	2020	4.70073	3.33605	1.36468	1.65544	-1.68061	3.04529
chr1_94167231_94167479_ETS1_HUMAN.H11MO.0.A_center158_to_CREB1_MA0018.3	chr1_94167231_94167479	CCACTCTGCCTGCTTCCCAGGCCTGCCCCTGGGCCTCTCTCCAAGGATGATTCTGTCTCCATTTTTGGTATCTACAGGCCTTGTGGGACTGGGAGGACTGAACTGGGCCCAGCATTCTCCAGGTGACTCACCAGGCAGGCCATGCAGAAAAGCCTGACGTCACATCCCTGAGTGGCCAGTCATCCTCCTGGTACCTGCCTTAAGAACATGTGAGCCACCCTCAGGGGCAGGGTGGGACTGGGCTGTGCT	+	chr1_94167231_94167479_ETS1_HUMAN.H11MO.0.A_center158	ETS	ACTTCCTG	158	CREB1	TGACGTCA	514	475	539	768	699	542	2.39179	3.60954	-1.21775	1.26596	-2.34358	1.12583
chr1_94167231_94167479_ETS1_HUMAN.H11MO.0.A_center158_to_E2F1_HUMAN.H11MO.0.A	chr1_94167231_94167479	CCACTCTGCCTGCTTCCCAGGCCTGCCCCTGGGCCTCTCTCCAAGGATGATTCTGTCTCCATTTTTGGTATCTACAGGCCTTGTGGGACTGGGAGGACTGAACTGGGCCCAGCATTCTCCAGGTGACTCACCAGGCAGGCCATGCAGAAAAGCCGGCGGGAACATCCCTGAGTGGCCAGTCATCCTCCTGGTACCTGCCTTAAGAACATGTGAGCCACCCTCAGGGGCAGGGTGGGACTGGGCTGTGCT	+	chr1_94167231_94167479_ETS1_HUMAN.H11MO.0.A_center158	ETS	ACTTCCTG	158	E2F1	GGCGGGAA	430	395	419	98	99	145	0.0171552	3.60954	-3.59239	1.26596	-2.34358	-1.2488
chr1_94167231_94167479_ETS1_HUMAN.H11MO.0.A_center158_to_EGR1_C2H2_1	chr1_94167231_94167479	CCACTCTGCCTGCTTCCCAGGCCTGCCCCTGGGCCTCTCTCCAAGGATGATTCTGTCTCCATTTTTGGTATCTACAGGCCTTGTGGGACTGGGAGGACTGAACTGGGCCCAGCATTCTCCAGGTGACTCACCAGGCAGGCCATGCAGAAAAGACGCCCACGCAATCCCTGAGTGGCCAGTCATCCTCCTGGTACCTGCCTTAAGAACATGTGAGCCACCCTCAGGGGCAGGGTGGGACTGGGCTGTGCT	+	chr1_94167231_94167479_ETS1_HUMAN.H11MO.0.A_center158	ETS	CCACTTCCTGC	158	EGR1	ACGCCCACGCA	278	303	306	573	513	481	2.79174	3.60954	-0.817804	1.26596	-2.34358	1.52578
chr1_94167231_94167479_ETS1_HUMAN.H11MO.0.A_center158_to_FOSL1_MA0477.1	chr1_94167231_94167479	CCACTCTGCCTGCTTCCCAGGCCTGCCCCTGGGCCTCTCTCCAAGGATGATTCTGTCTCCATTTTTGGTATCTACAGGCCTTGTGGGACTGGGAGGACTGAACTGGGCCCAGCATTCTCCAGGTGACTCACCAGGCAGGCCATGCAGAAAAGCGTGACTCATCATCCCTGAGTGGCCAGTCATCCTCCTGGTACCTGCCTTAAGAACATGTGAGCCACCCTCAGGGGCAGGGTGGGACTGGGCTGTGCT	+	chr1_94167231_94167479_ETS1_HUMAN.H11MO.0.A_center158	ETS	CACTTCCTG	158	AP-1	GTGACTCAT	454	484	477	1322	1216	989	3.3097	3.60954	-0.299839	1.26596	-2.34358	2.04375
chr1_94167231_94167479_ETS1_HUMAN.H11MO.0.A_center158_to_MAFK_MA0496.2	chr1_94167231_94167479	CCACTCTGCCTGCTTCCCAGGCCTGCCCCTGGGCCTCTCTCCAAGGATGATTCTGTCTCCATTTTTGGTATCTACAGGCCTTGTGGGACTGGGAGGACTGAACTGGGCCCAGCATTCTCCAGGTGACTCACCAGGCAGGCCATGCAGAAAATGCTGAGTCAGCATCCCTGAGTGGCCAGTCATCCTCCTGGTACCTGCCTTAAGAACATGTGAGCCACCCTCAGGGGCAGGGTGGGACTGGGCTGTGCT	+	chr1_94167231_94167479_ETS1_HUMAN.H11MO.0.A_center158	ETS	GCCACTTCCTGCA	158	MAF	TGCTGAGTCAGCA	601	616	591	1102	957	853	2.66698	3.60954	-0.942562	1.26596	-2.34358	1.40102
chr1_94167231_94167479_ETS1_HUMAN.H11MO.0.A_center158_to_MECP2_HUMAN.H11MO.0.C	chr1_94167231_94167479	CCACTCTGCCTGCTTCCCAGGCCTGCCCCTGGGCCTCTCTCCAAGGATGATTCTGTCTCCATTTTTGGTATCTACAGGCCTTGTGGGACTGGGAGGACTGAACTGGGCCCAGCATTCTCCAGGTGACTCACCAGGCAGGCCATGCAGAAAAGCCCCCGGAGGCATCCCTGAGTGGCCAGTCATCCTCCTGGTACCTGCCTTAAGAACATGTGAGCCACCCTCAGGGGCAGGGTGGGACTGGGCTGTGCT	+	chr1_94167231_94167479_ETS1_HUMAN.H11MO.0.A_center158	ETS	ACTTCCT	158	MECP2	CCCGGAG	1141	1172	1158	703	661	792	1.24074	3.60954	-2.3688	1.26596	-2.34358	-0.0252145
chr1_94167231_94167479_ETS1_HUMAN.H11MO.0.A_center158_to_TP53_MA0106.3	chr1_94167231_94167479	CCACTCTGCCTGCTTCCCAGGCCTGCCCCTGGGCCTCTCTCCAAGGATGATTCTGTCTCCATTTTTGGTATCTACAGGCCTTGTGGGACTGGGAGGACTGAACTGGGCCCAGCATTCTCCAGGTGACTCACCAGGCAGGCCATGCAGAAAACATGCCCGGGCATGTCCTGAGTGGCCAGTCATCCTCCTGGTACCTGCCTTAAGAACATGTGAGCCACCCTCAGGGGCAGGGTGGGACTGGGCTGTGCT	+	chr1_94167231_94167479_ETS1_HUMAN.H11MO.0.A_center158	ETS	AGCCACTTCCTGCATC	158	P53	ACATGCCCGGGCATGT	602	682	661	2187	1786	2614	3.66347	3.60954	0.0539241	1.26596	-2.34358	2.39751
chr1_94167231_94167479_FOSL1_MA0477.1_center127_to_CREB1_MA0018.3	chr1_94167231_94167479	CCACTCTGCCTGCTTCCCAGGCCTGCCCCTGGGCCTCTCTCCAAGGATGATTCTGTCTCCATTTTTGGTATCTACAGGCCTTGTGGGACTGGGAGGACTGAACTGGGCCCAGCATTCTCCAGGTGACGTCACAGGCAGGCCATGCAGAAAAGCCACTTCCTGCATCCCTGAGTGGCCAGTCATCCTCCTGGTACCTGCCTTAAGAACATGTGAGCCACCCTCAGGGGCAGGGTGGGACTGGGCTGTGCT	+	chr1_94167231_94167479_FOSL1_MA0477.1_center127	AP-1	TGACTCAC	127	CREB1	TGACGTCA	376	415	389	1013	936	769	3.19391	3.60954	-0.415627	1.02061	-2.58893	2.1733
chr1_94167231_94167479_FOSL1_MA0477.1_center127_to_E2F1_HUMAN.H11MO.0.A	chr1_94167231_94167479	CCACTCTGCCTGCTTCCCAGGCCTGCCCCTGGGCCTCTCTCCAAGGATGATTCTGTCTCCATTTTTGGTATCTACAGGCCTTGTGGGACTGGGAGGACTGAACTGGGCCCAGCATTCTCCAGGGGCGGGAACAGGCAGGCCATGCAGAAAAGCCACTTCCTGCATCCCTGAGTGGCCAGTCATCCTCCTGGTACCTGCCTTAAGAACATGTGAGCCACCCTCAGGGGCAGGGTGGGACTGGGCTGTGCT	+	chr1_94167231_94167479_FOSL1_MA0477.1_center127	AP-1	TGACTCAC	127	E2F1	GGCGGGAA	364	382	340	189	159	289	1.08831	3.60954	-2.52123	1.02061	-2.58893	0.0676999
chr1_94167231_94167479_FOSL1_MA0477.1_center127_to_EGR1_C2H2_1	chr1_94167231_94167479	CCACTCTGCCTGCTTCCCAGGCCTGCCCCTGGGCCTCTCTCCAAGGATGATTCTGTCTCCATTTTTGGTATCTACAGGCCTTGTGGGACTGGGAGGACTGAACTGGGCCCAGCATTCTCCAACGCCCACGCAAGGCAGGCCATGCAGAAAAGCCACTTCCTGCATCCCTGAGTGGCCAGTCATCCTCCTGGTACCTGCCTTAAGAACATGTGAGCCACCCTCAGGGGCAGGGTGGGACTGGGCTGTGCT	+	chr1_94167231_94167479_FOSL1_MA0477.1_center127	AP-1	GGTGACTCACC	127	EGR1	ACGCCCACGCA	404	439	469	740	542	660	2.50627	3.60954	-1.10327	1.02061	-2.58893	1.48566
chr1_94167231_94167479_FOSL1_MA0477.1_center127_to_ETS1_HUMAN.H11MO.0.A	chr1_94167231_94167479	CCACTCTGCCTGCTTCCCAGGCCTGCCCCTGGGCCTCTCTCCAAGGATGATTCTGTCTCCATTTTTGGTATCTACAGGCCTTGTGGGACTGGGAGGACTGAACTGGGCCCAGCATTCTCCAGACCGGAAGTCAGGCAGGCCATGCAGAAAAGCCACTTCCTGCATCCCTGAGTGGCCAGTCATCCTCCTGGTACCTGCCTTAAGAACATGTGAGCCACCCTCAGGGGCAGGGTGGGACTGGGCTGTGCT	+	chr1_94167231_94167479_FOSL1_MA0477.1_center127	AP-1	GTGACTCAC	127	ETS	ACCGGAAGT	799	880	886	864	725	1280	2.02832	3.60954	-1.58122	1.02061	-2.58893	1.00771
chr1_94167231_94167479_FOSL1_MA0477.1_center127_to_MECP2_HUMAN.H11MO.0.C	chr1_94167231_94167479	CCACTCTGCCTGCTTCCCAGGCCTGCCCCTGGGCCTCTCTCCAAGGATGATTCTGTCTCCATTTTTGGTATCTACAGGCCTTGTGGGACTGGGAGGACTGAACTGGGCCCAGCATTCTCCAGGCCCGGAGCCAGGCAGGCCATGCAGAAAAGCCACTTCCTGCATCCCTGAGTGGCCAGTCATCCTCCTGGTACCTGCCTTAAGAACATGTGAGCCACCCTCAGGGGCAGGGTGGGACTGGGCTGTGCT	+	chr1_94167231_94167479_FOSL1_MA0477.1_center127	AP-1	TGACTCA	127	MECP2	CCCGGAG	424	437	440	260	201	349	1.18913	3.60954	-2.42041	1.02061	-2.58893	0.168519
chr1_94167231_94167479_FOSL1_MA0477.1_center127_to_TP53_MA0106.3	chr1_94167231_94167479	CCACTCTGCCTGCTTCCCAGGCCTGCCCCTGGGCCTCTCTCCAAGGATGATTCTGTCTCCATTTTTGGTATCTACAGGCCTTGTGGGACTGGGAGGACTGAACTGGGCCCAGCATTCTCACATGCCCGGGCATGTCAGGCCATGCAGAAAAGCCACTTCCTGCATCCCTGAGTGGCCAGTCATCCTCCTGGTACCTGCCTTAAGAACATGTGAGCCACCCTCAGGGGCAGGGTGGGACTGGGCTGTGCT	+	chr1_94167231_94167479_FOSL1_MA0477.1_center127	AP-1	CAGGTGACTCACCAGG	127	P53	ACATGCCCGGGCATGT	644	641	728	2401	1791	2584	3.66229	3.60954	0.0527529	1.02061	-2.58893	2.64168
chr1_98789495_98789743_E2F1_HUMAN.H11MO.0.A_center70_to_CREB1_MA0018.3	chr1_98789495_98789743	TTTGGCTAGGCTGAATTACATTTCTGGTGAGGGTGGGCCACGGAGAAATTCTTGCAAGATTTGGAATGACGTCAGGAAGTCTCAGCTATTTTGTGGTTCACACGCCTTGTCGCTTATCTGCTGATTCACCACCTTGGAATGAGGCAGCAGCTGAGCCTGCAACTGTTCAACTTTCCTCTAAACTTTCCTTCAGCTTCTCCAACTTTTGGACCAATTCTATAGCACCATGATGAAGGGCCTTTGCTTCTG	+	chr1_98789495_98789743_E2F1_HUMAN.H11MO.0.A_center70	E2F1	GGCAGGAA	70	CREB1	TGACGTCA	470	469	464	1360	1227	1018	3.35011	2.63997	0.710137	0.900696	-1.73927	2.44941
chr1_98789495_98789743_E2F1_HUMAN.H11MO.0.A_center70_to_EGR1_C2H2_1	chr1_98789495_98789743	TTTGGCTAGGCTGAATTACATTTCTGGTGAGGGTGGGCCACGGAGAAATTCTTGCAAGATTTGGACGCCCACGCAGAAGTCTCAGCTATTTTGTGGTTCACACGCCTTGTCGCTTATCTGCTGATTCACCACCTTGGAATGAGGCAGCAGCTGAGCCTGCAACTGTTCAACTTTCCTCTAAACTTTCCTTCAGCTTCTCCAACTTTTGGACCAATTCTATAGCACCATGATGAAGGGCCTTTGCTTCTG	+	chr1_98789495_98789743_E2F1_HUMAN.H11MO.0.A_center70	E2F1	AAGGCAGGAAG	70	EGR1	ACGCCCACGCA	428	443	459	1223	957	1157	3.26469	2.63997	0.624725	0.900696	-1.73927	2.364
chr1_98789495_98789743_E2F1_HUMAN.H11MO.0.A_center70_to_ETS1_HUMAN.H11MO.0.A	chr1_98789495_98789743	TTTGGCTAGGCTGAATTACATTTCTGGTGAGGGTGGGCCACGGAGAAATTCTTGCAAGATTTGGAACCGGAAGTGGAAGTCTCAGCTATTTTGTGGTTCACACGCCTTGTCGCTTATCTGCTGATTCACCACCTTGGAATGAGGCAGCAGCTGAGCCTGCAACTGTTCAACTTTCCTCTAAACTTTCCTTCAGCTTCTCCAACTTTTGGACCAATTCTATAGCACCATGATGAAGGGCCTTTGCTTCTG	+	chr1_98789495_98789743_E2F1_HUMAN.H11MO.0.A_center70	E2F1	AGGCAGGAA	70	ETS	ACCGGAAGT	277	325	334	792	622	593	3.07664	2.63997	0.436676	0.900696	-1.73927	2.17595
chr1_98789495_98789743_E2F1_HUMAN.H11MO.0.A_center70_to_FOSL1_MA0477.1	chr1_98789495_98789743	TTTGGCTAGGCTGAATTACATTTCTGGTGAGGGTGGGCCACGGAGAAATTCTTGCAAGATTTGGAGTGACTCATGGAAGTCTCAGCTATTTTGTGGTTCACACGCCTTGTCGCTTATCTGCTGATTCACCACCTTGGAATGAGGCAGCAGCTGAGCCTGCAACTGTTCAACTTTCCTCTAAACTTTCCTTCAGCTTCTCCAACTTTTGGACCAATTCTATAGCACCATGATGAAGGGCCTTTGCTTCTG	+	chr1_98789495_98789743_E2F1_HUMAN.H11MO.0.A_center70	E2F1	AGGCAGGAA	70	AP-1	GTGACTCAT	411	414	404	1777	1500	1585	3.9389	2.63997	1.29893	0.900696	-1.73927	3.03821
[truncated: 8,623 more rows]
